# Supplementary material for: Safety of corticosteroids in young children with acute respiratory conditions: a systematic review and meta-analysis
Source: PubMed Central journal article supplement — BMJ Open. 2019 Aug 1;9(8):e028511. doi: 10.1136/bmjopen-2018-028511 (PMC6688746; doi:10.1136/bmjopen-2018-028511), 2019-08-01

## Supplement 6 Forest plots of adverse events

### Systemic vs. Placebo

- a. Infection & respiratory system p. 2-12
- b. Gastro-intestinal tract p. 13-22
- c. CNS & behaviour effects p. 23-29
- d. Dermatologic conditions p. 30-32
- e. Endocrine/ metabolic & musculoskeletal systems p. 33-35
- f. Cardiovascular system p. 36-38
- g. General adverse events/ other symptoms p. 39-40
- h. Immune system & oncology p. 41

### Inhaled vs. Placebo

- a. Infection & respiratory system p. 42-47
- b. Gastro-intestinal tract p. 48-51
- c. CNS & behaviour effects p. 52-54
- d. Dermatologic conditions p. 55-57
- e. Endocrine/ metabolic & musculoskeletal systems p. 58
- f. Cardiovascular system p. 59

### Dexamethasone vs. Other steroid

- a. Gastro-intestinal tract p. 60-63
- b. CNS & behaviour effects p. 64-66
- c. Dermatologic conditions p. 67
- d. Endocrine/ metabolic & musculoskeletal systems p. 68
- e. Cardiovascular system p. 69
- f. General adverse events/ other symptoms p. 70-71

## SYSTEMIC vs. PLACEBO – Infection & Respiratory

### Severe infections

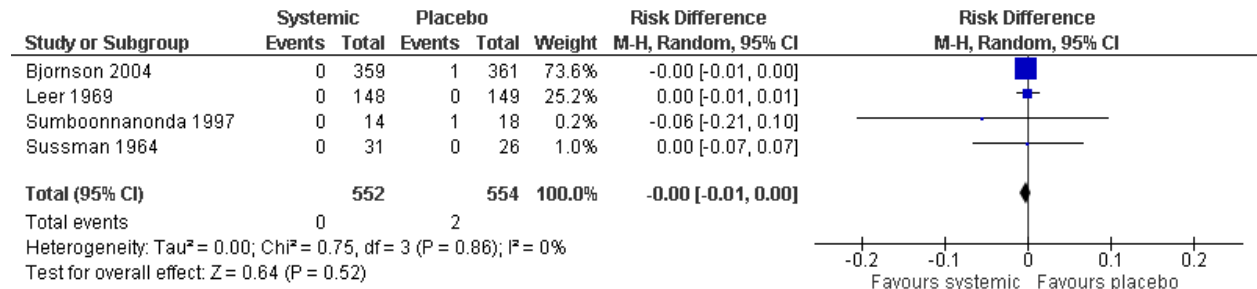

### Severe infections – Peto

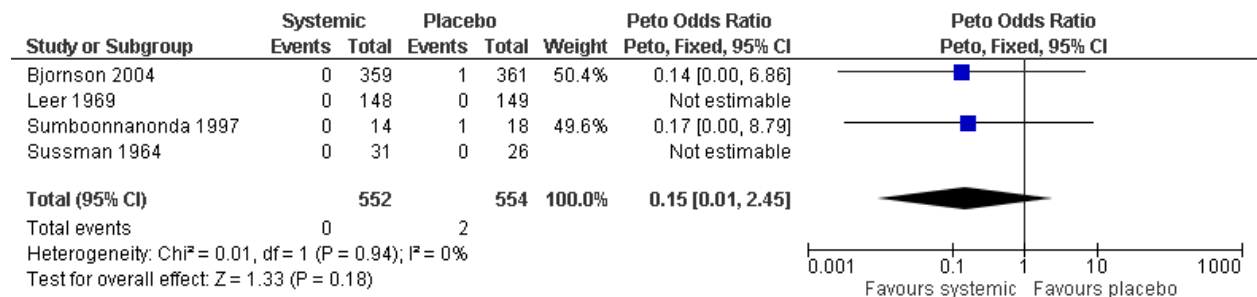

### Severe infections (by dose)

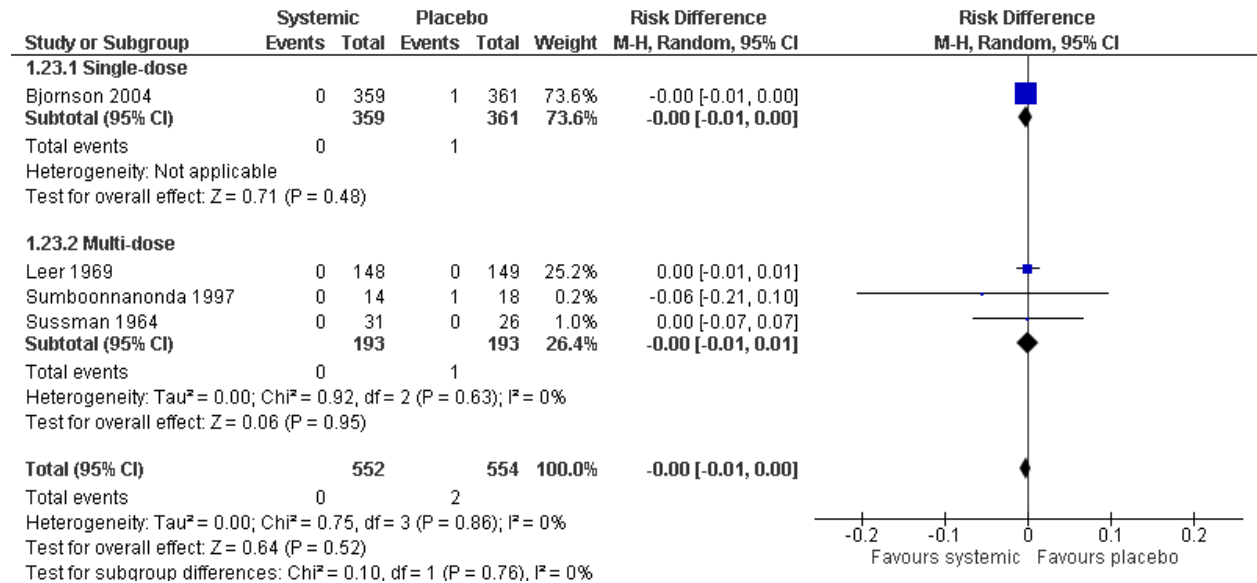

Severe infections (by dose) – Peto

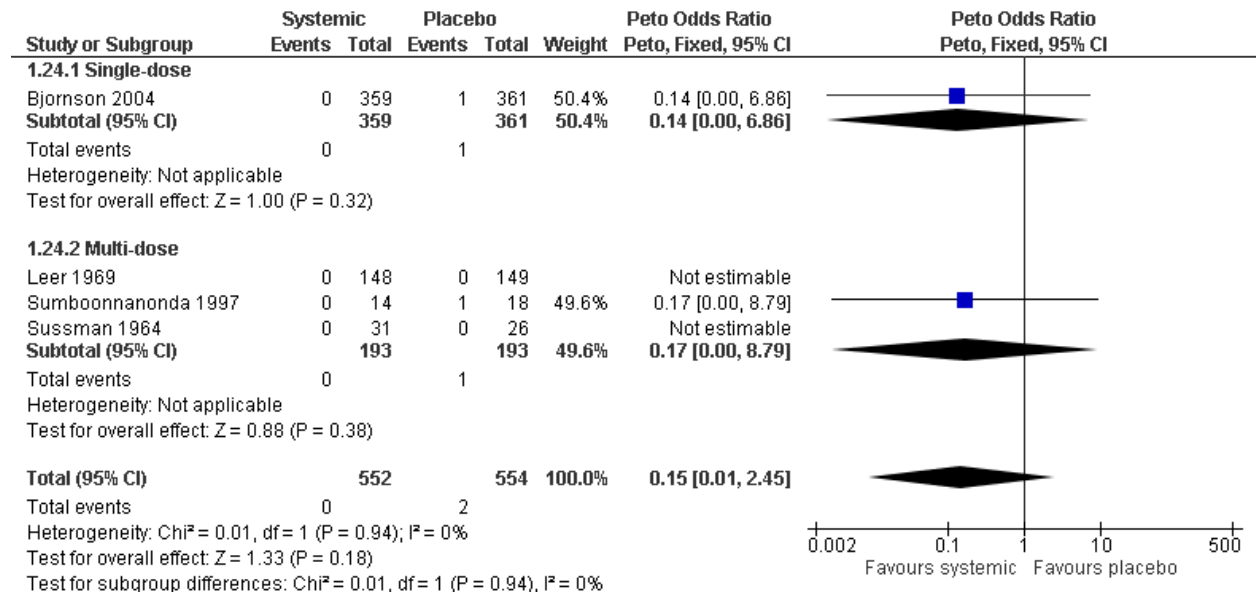

Severe infections (by condition)

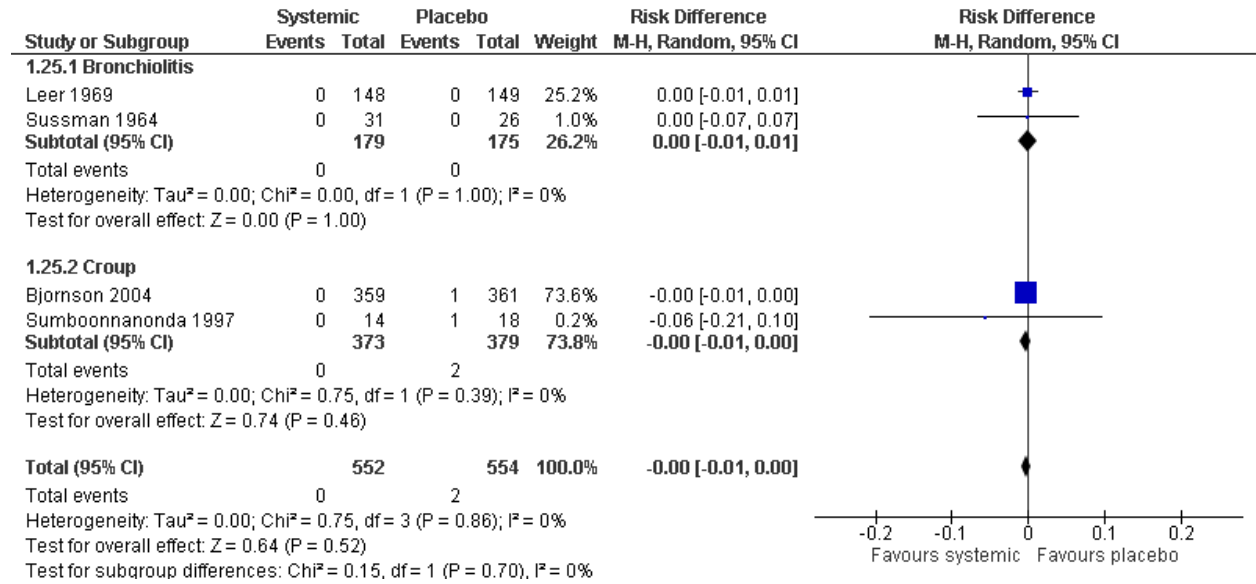

Severe infections (by condition) – Peto

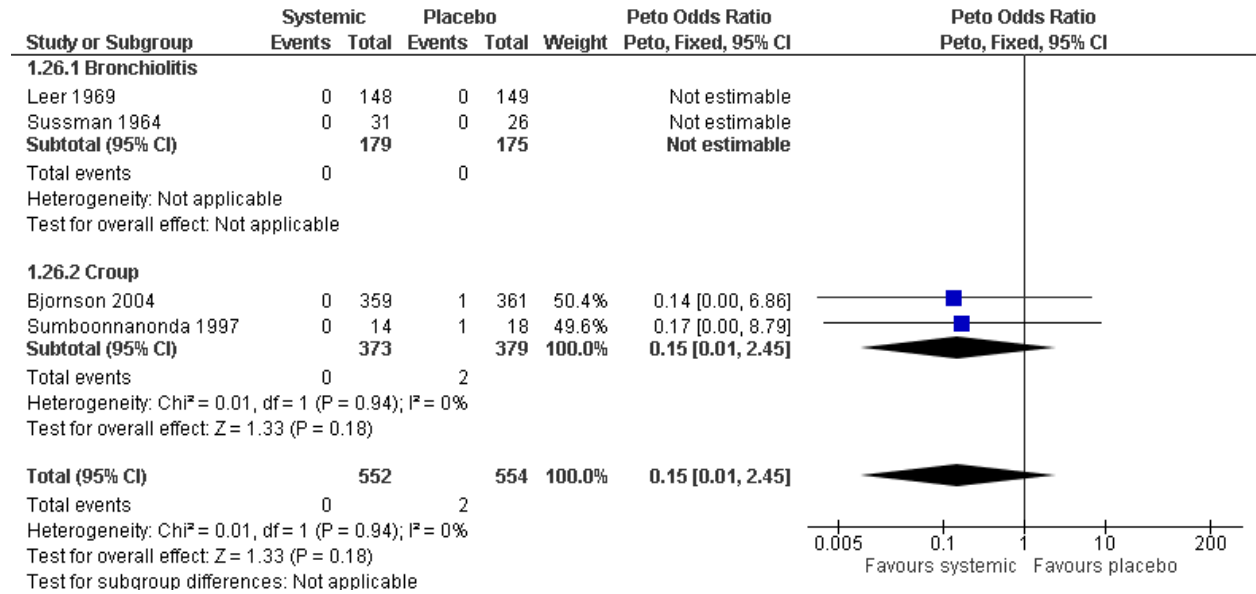

Systemic infections

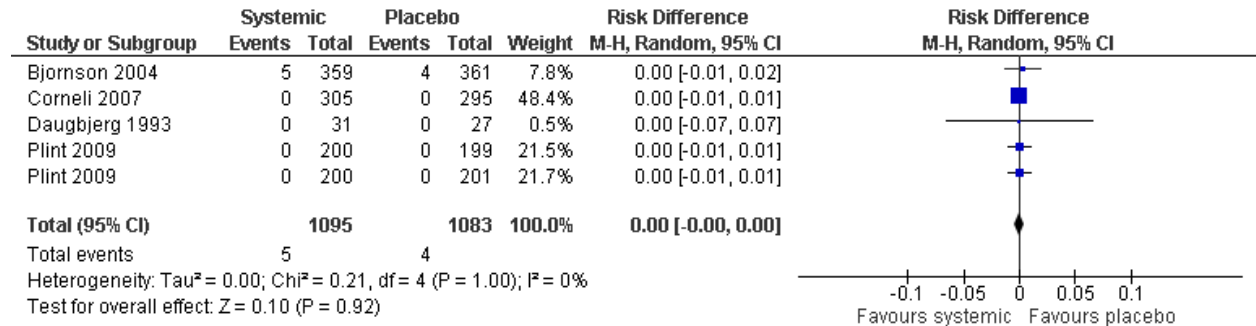

Systemic infections – Peto

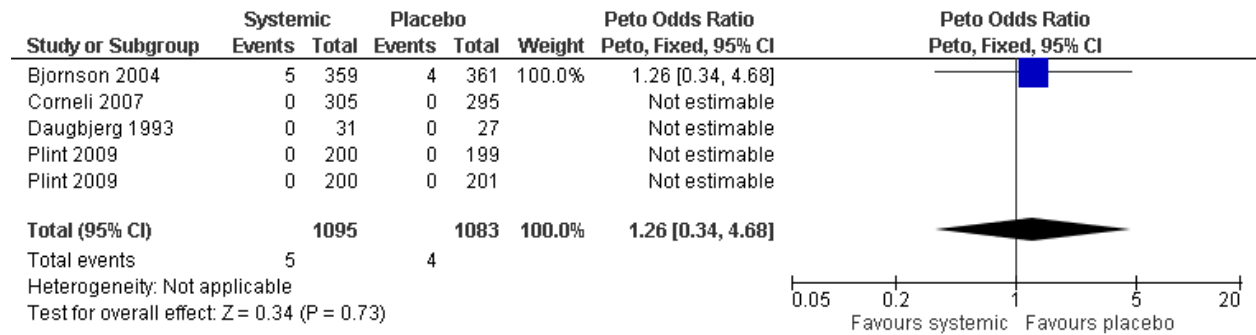

Systemic infections (by dose)

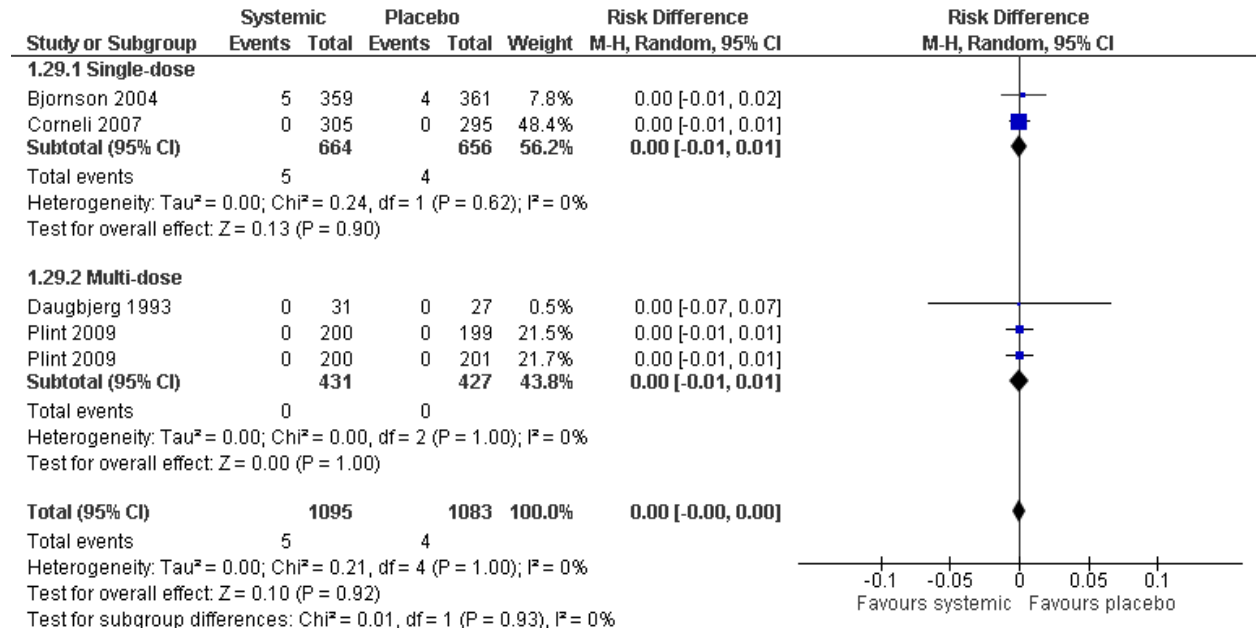

Systemic infections (by dose) – Peto

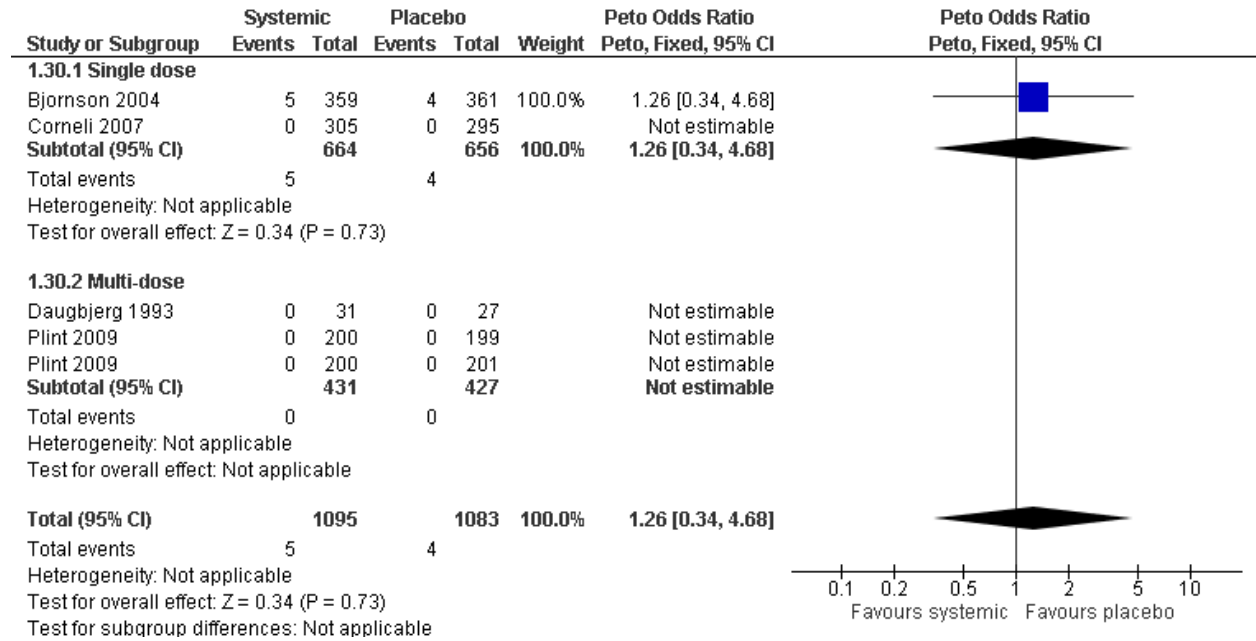

Systemic infections (by condition)

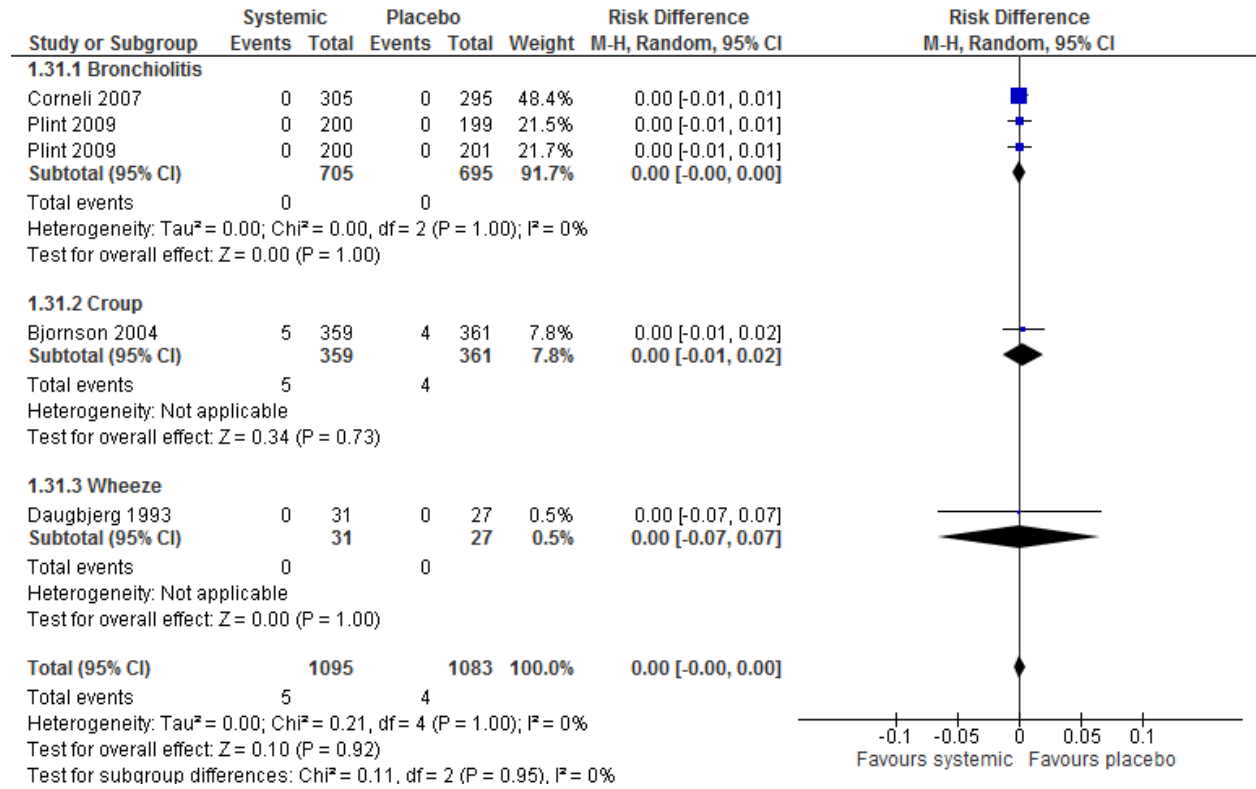

Systemic infections (by condition) – Peto

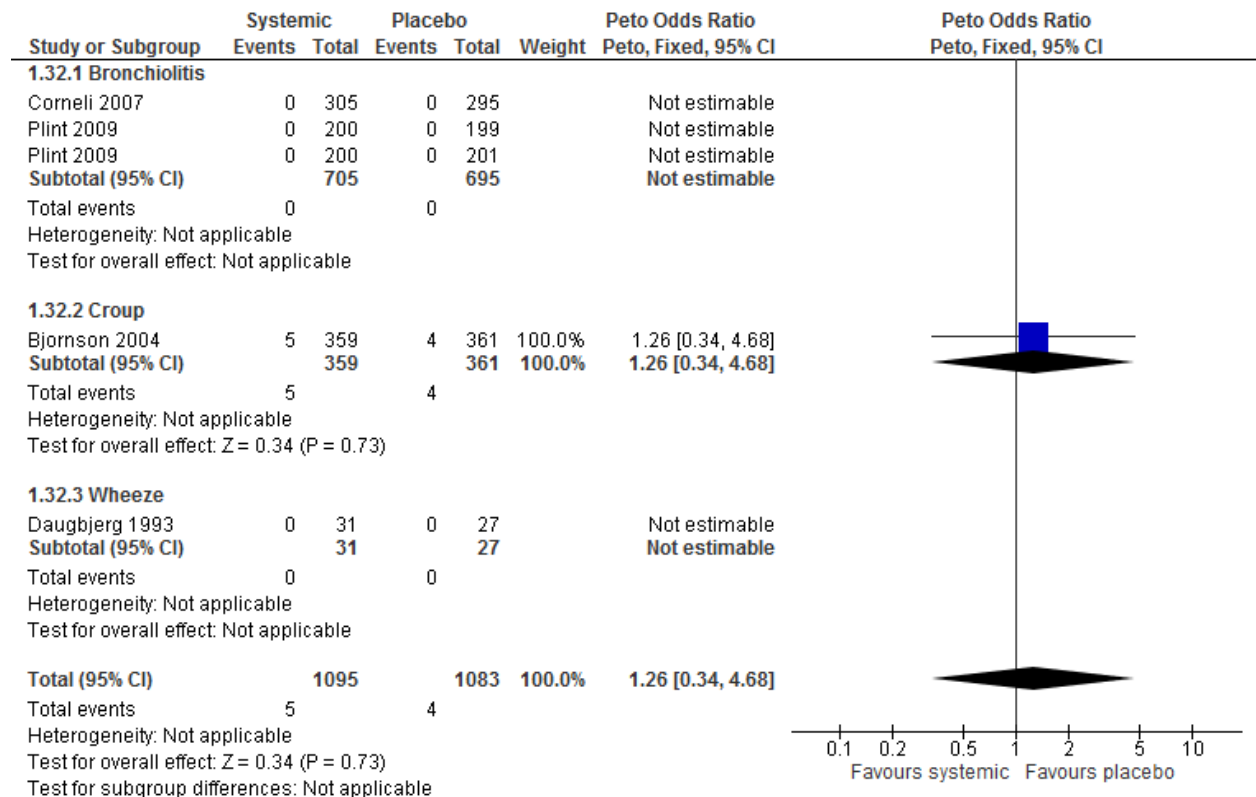

## Lung/trachea

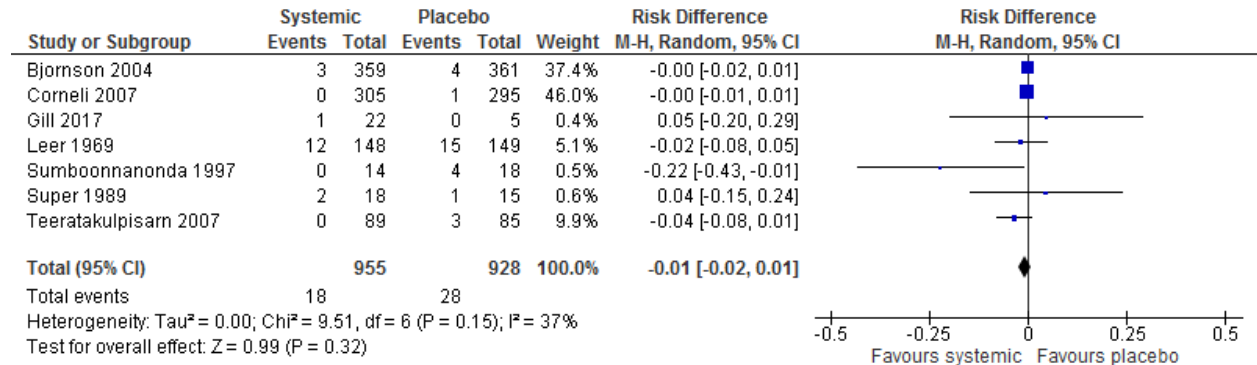

## Lung/trachea – Peto

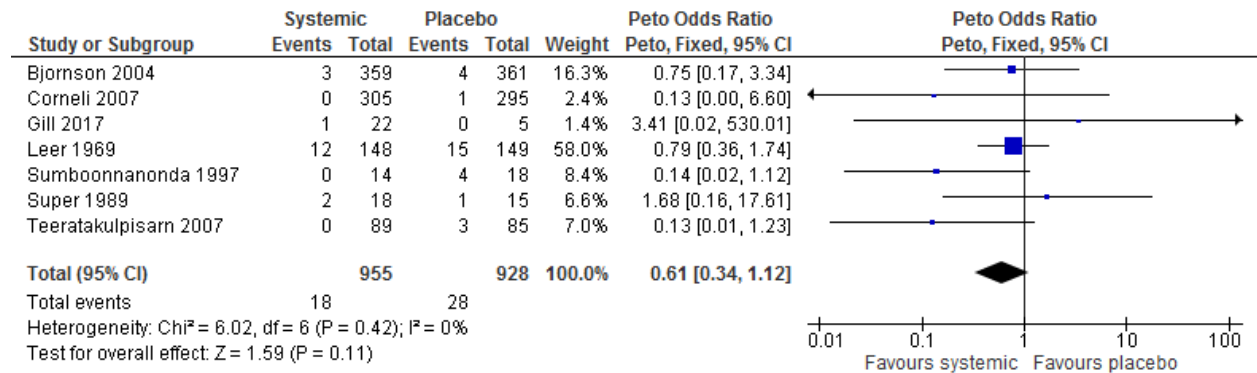

## Lung/trachea (by dose)

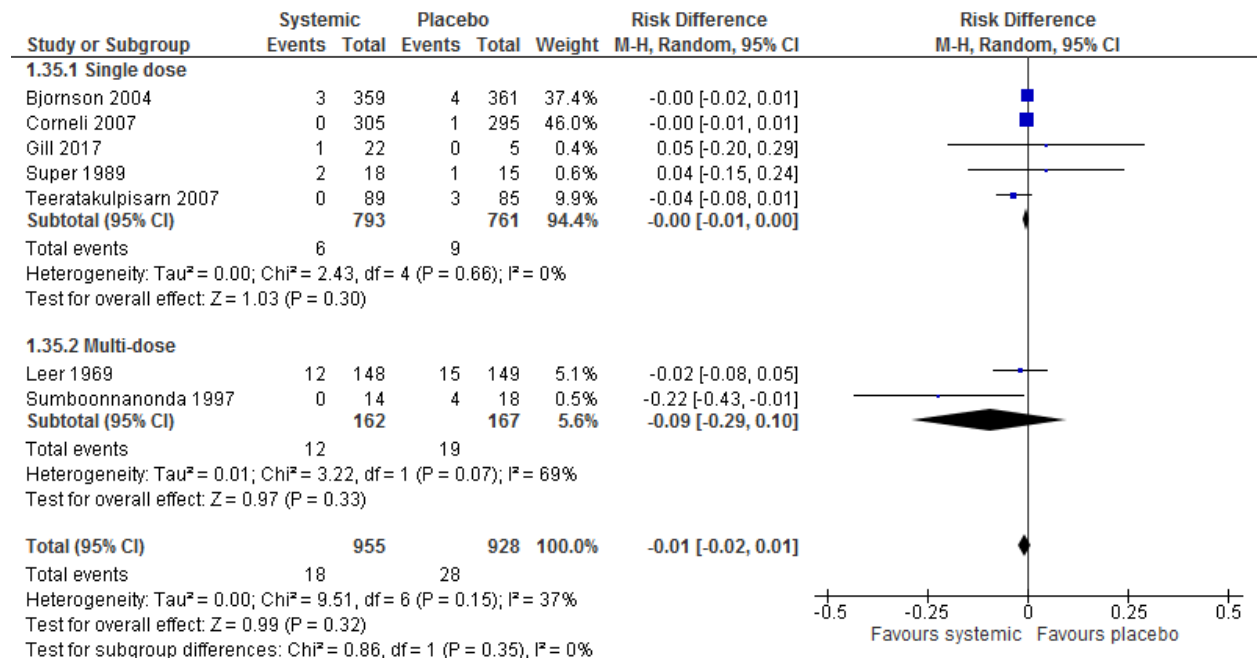

Lung/trachea (by dose) – Peto

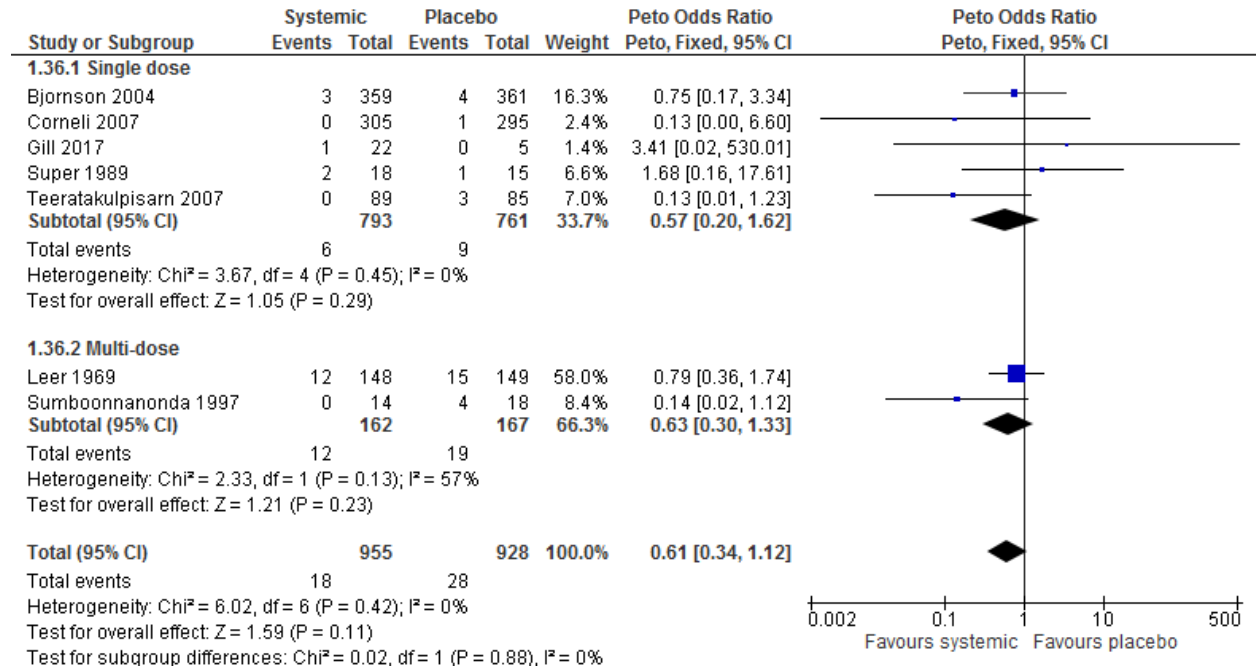

Lung/trachea (by condition)

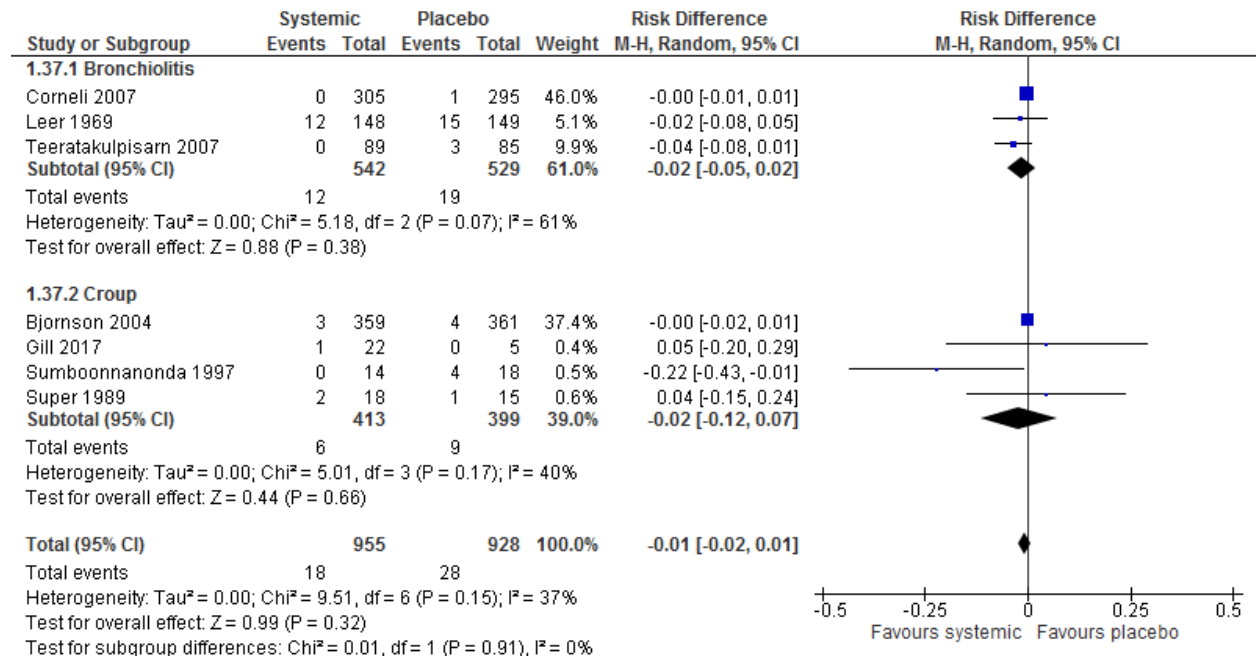



Lung/trachea (by condition) – Peto

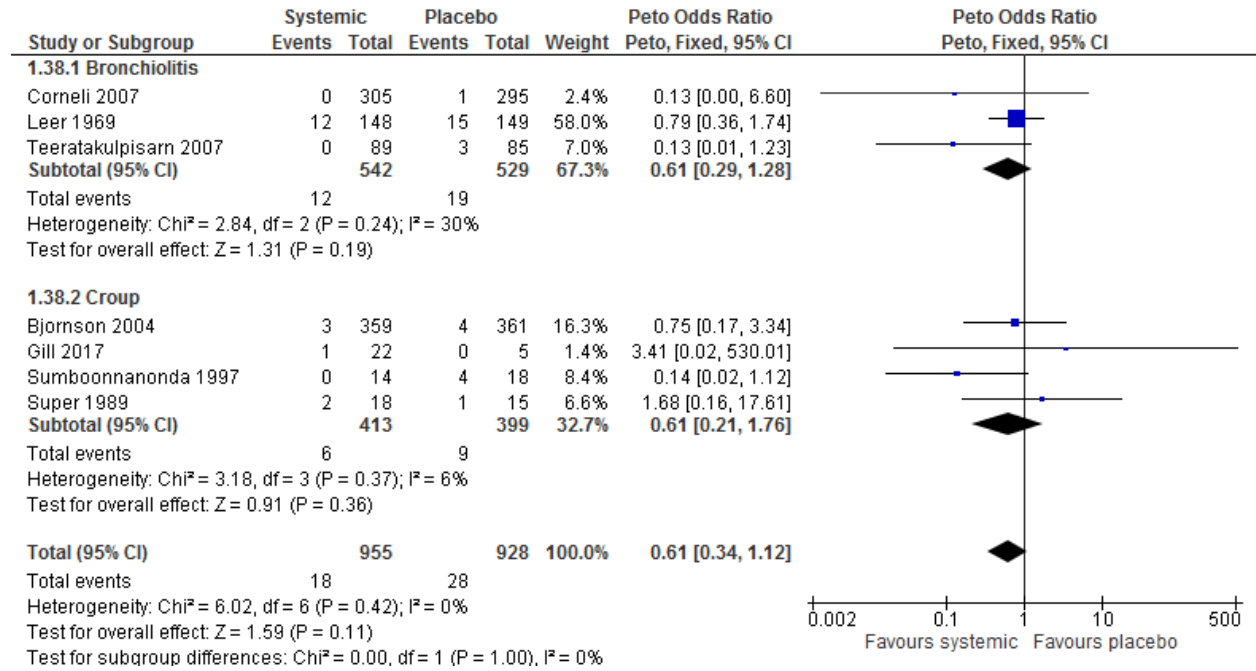

URT

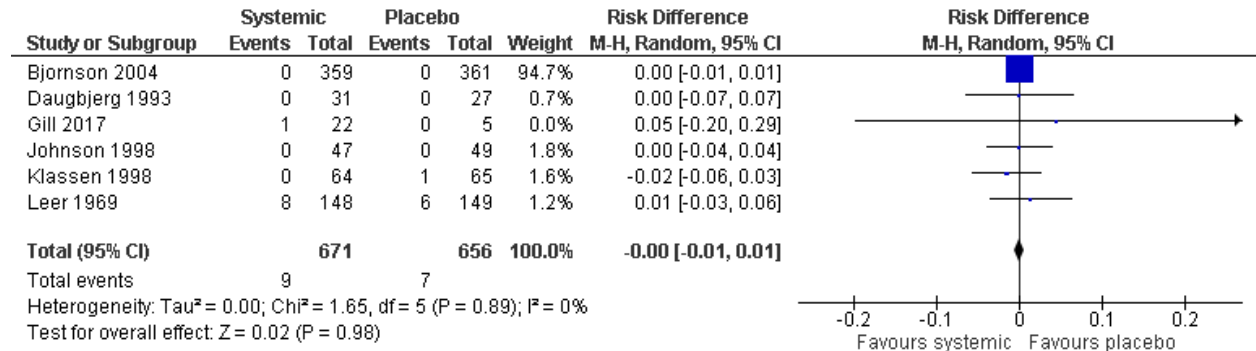

URT – Peto

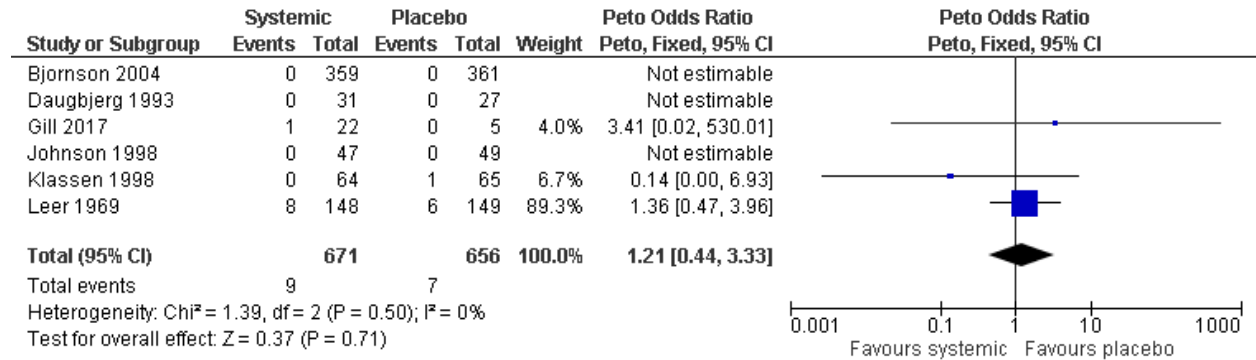

URT (by dose)

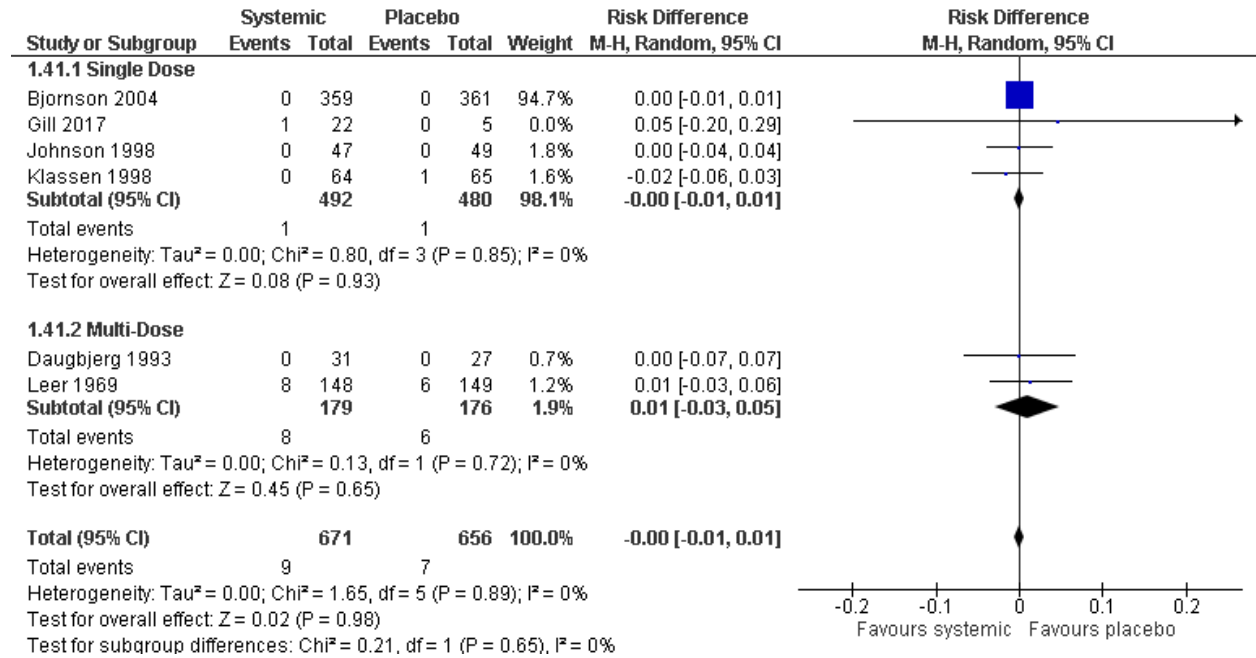

URT (by dose) – Peto

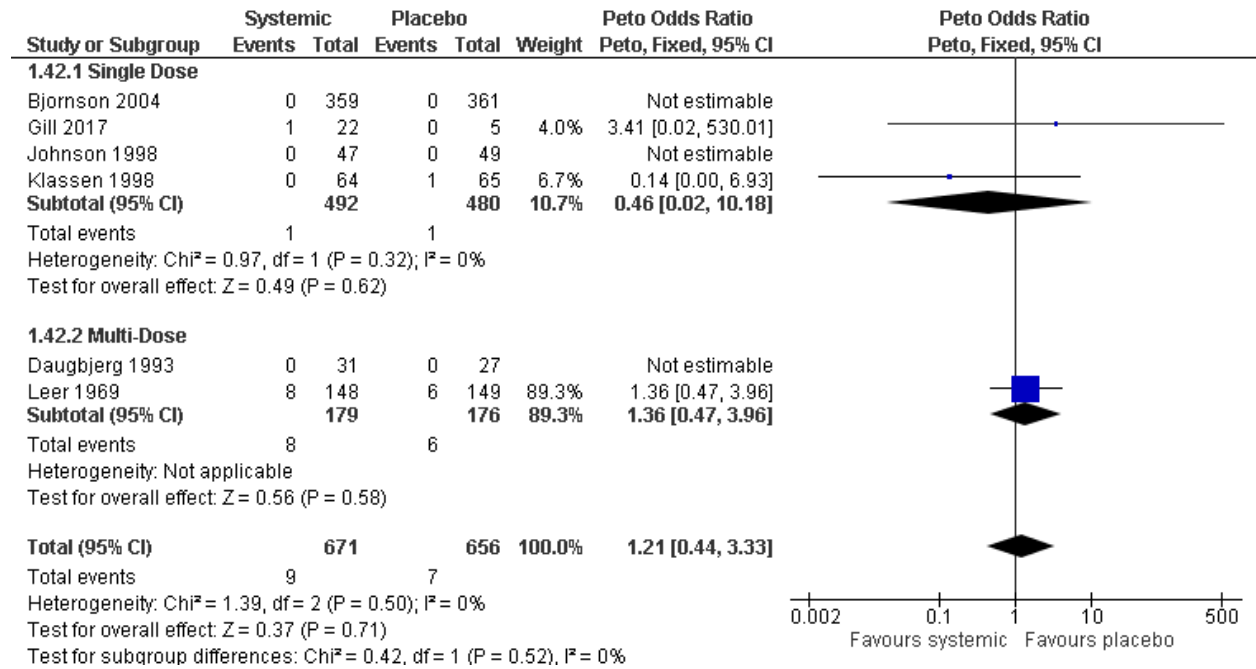

URT (by condition)

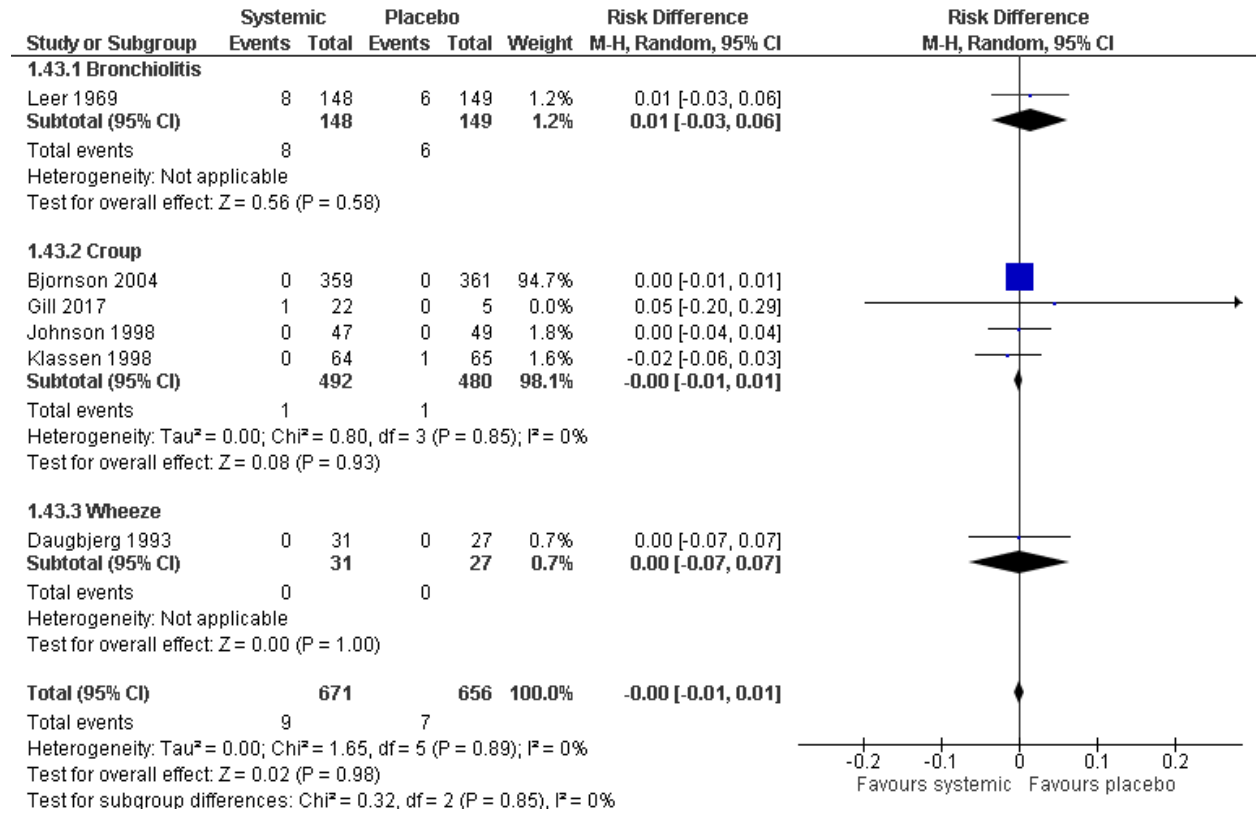

URT (by condition) – Peto

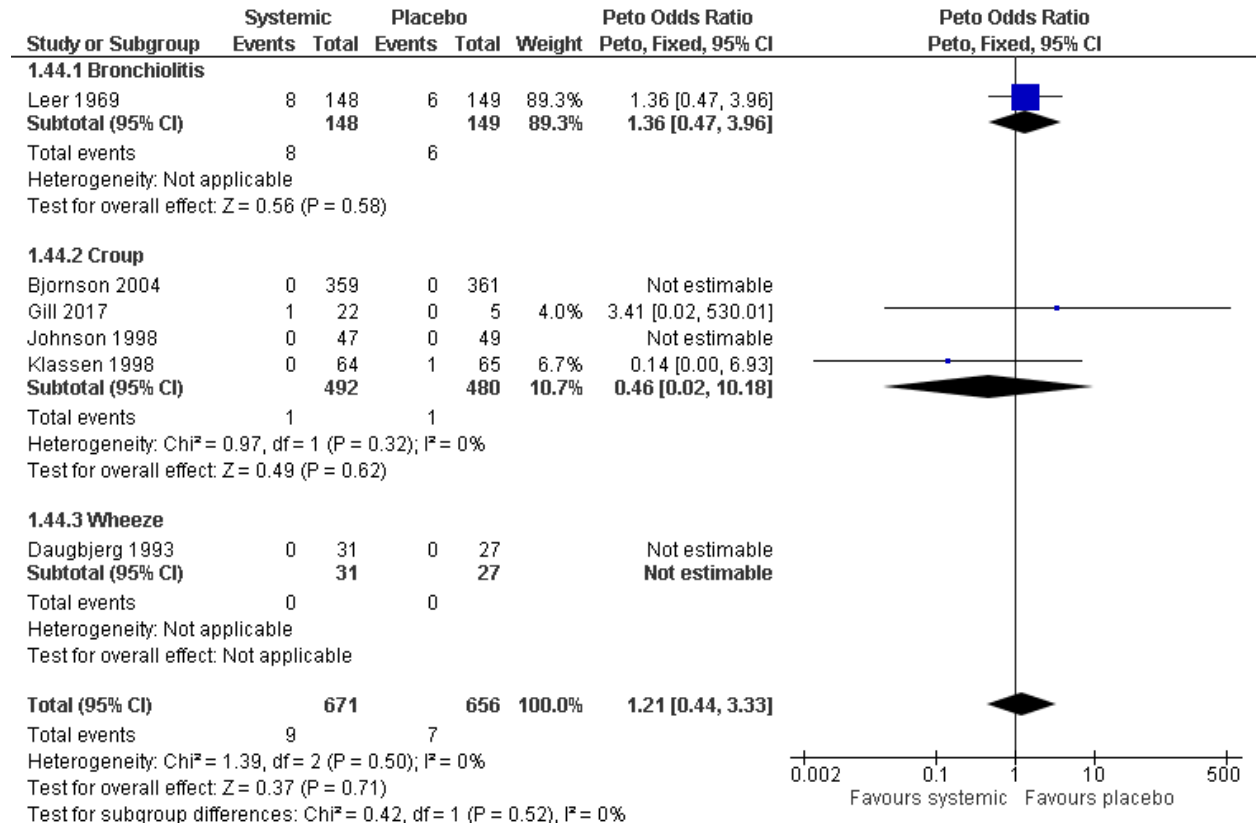

Voice complaints

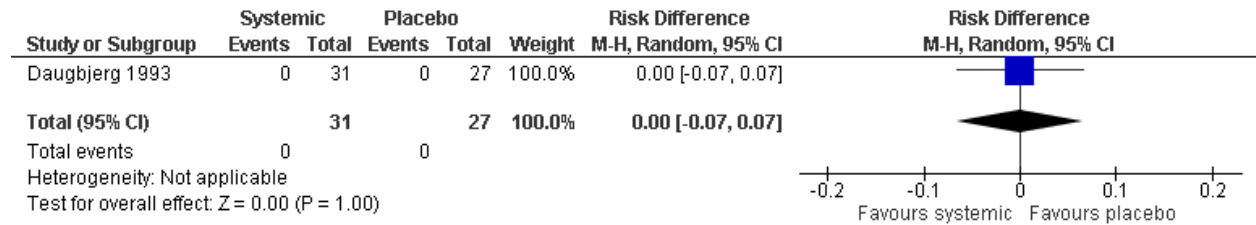

Voice complaints – Peto

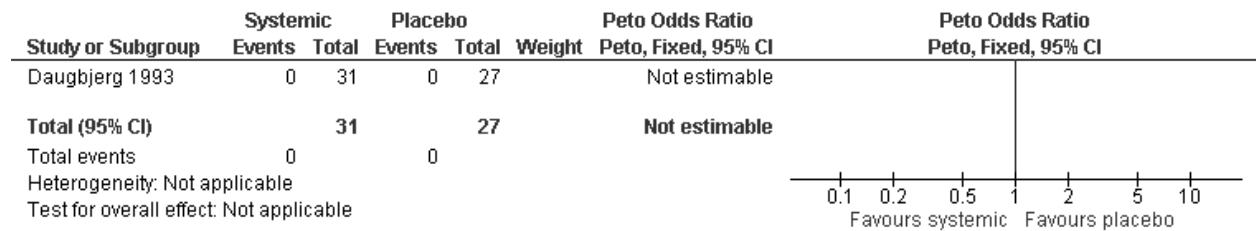

**SYSTEMIC vs. PLACEBO – GI**

**GI bleeding**

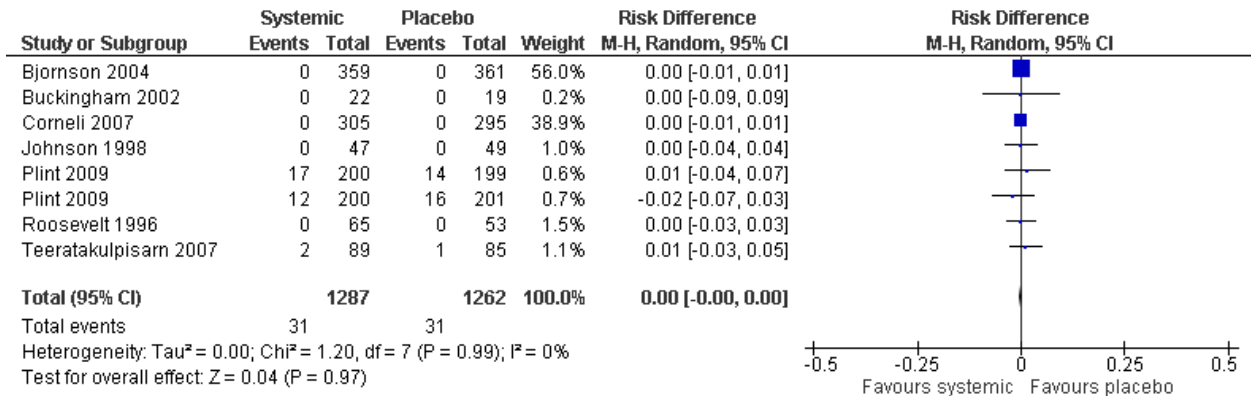

**GI bleeding – Peto**

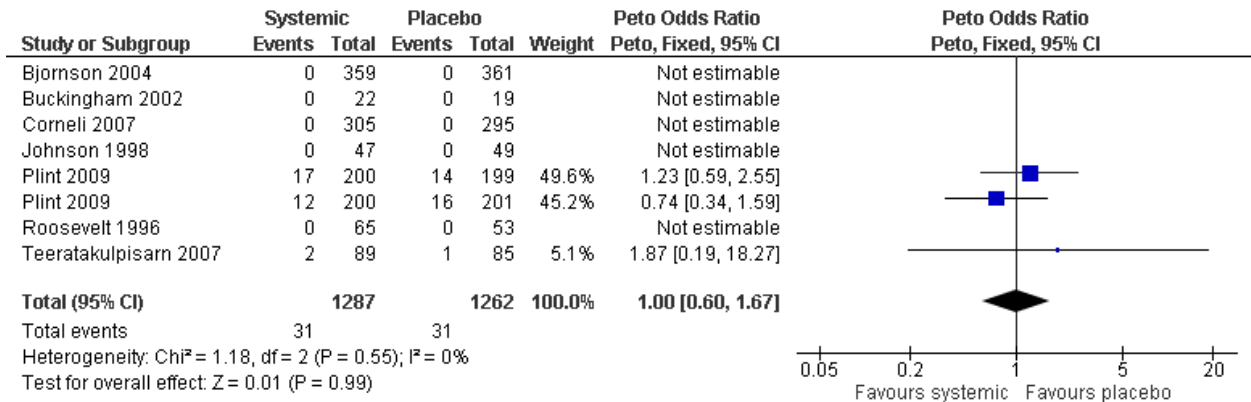

## GI bleeding (by dose)

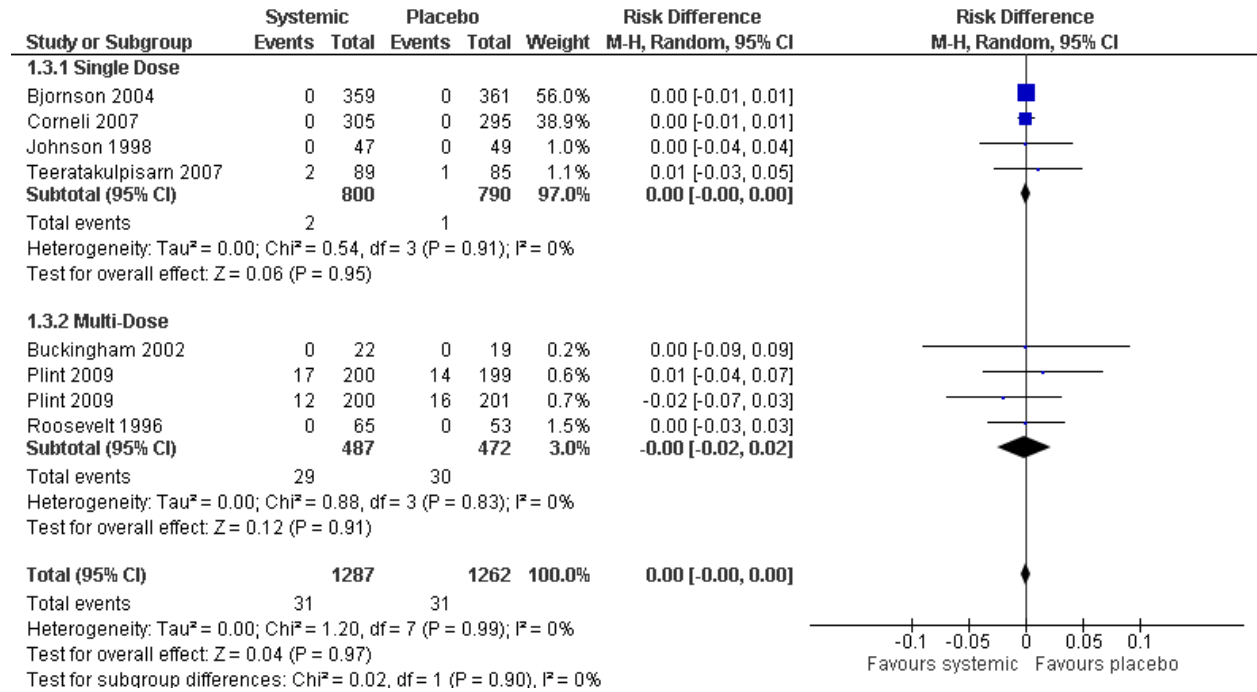

## GI bleeding (by dose) – Peto

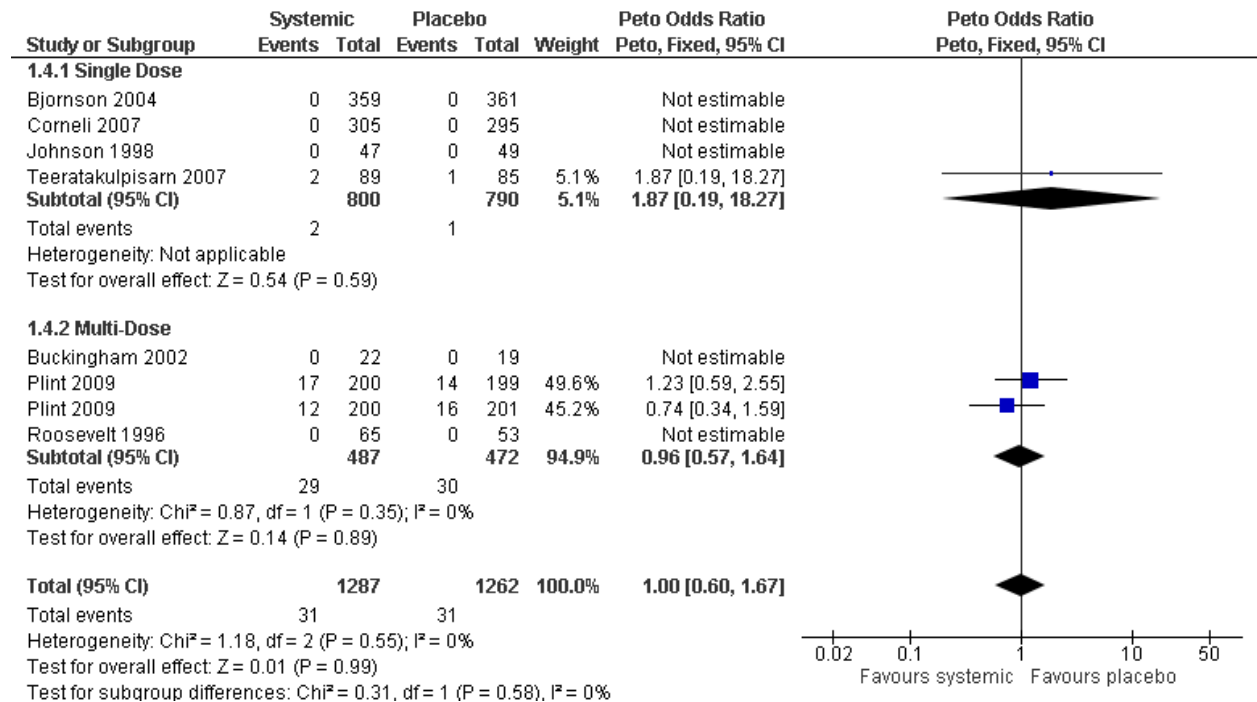

GI bleeding (by condition)

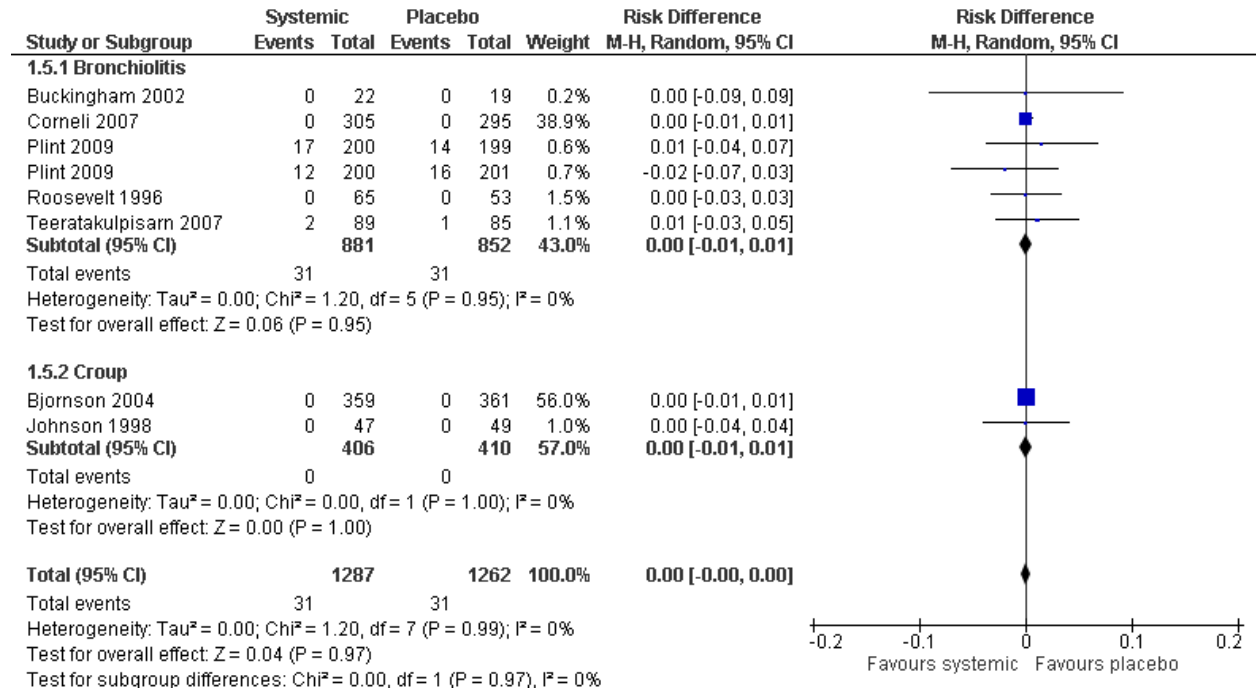

GI bleeding (by condition) - Peto

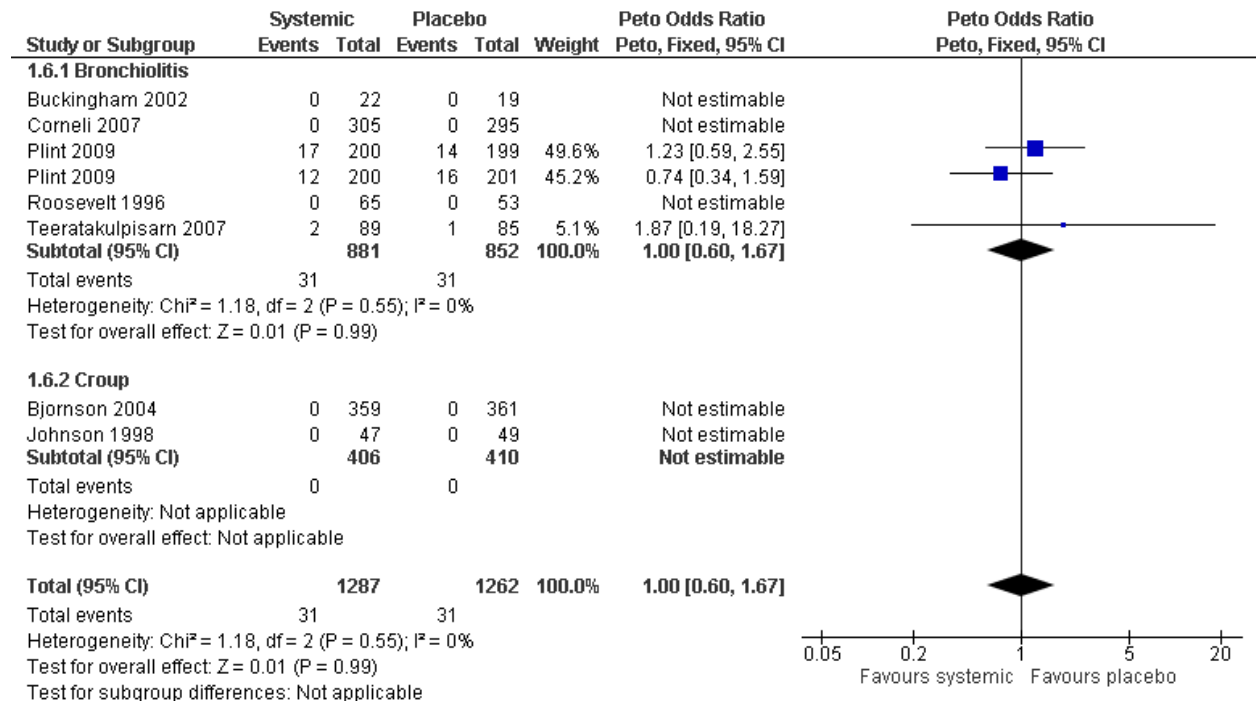

## Vomiting

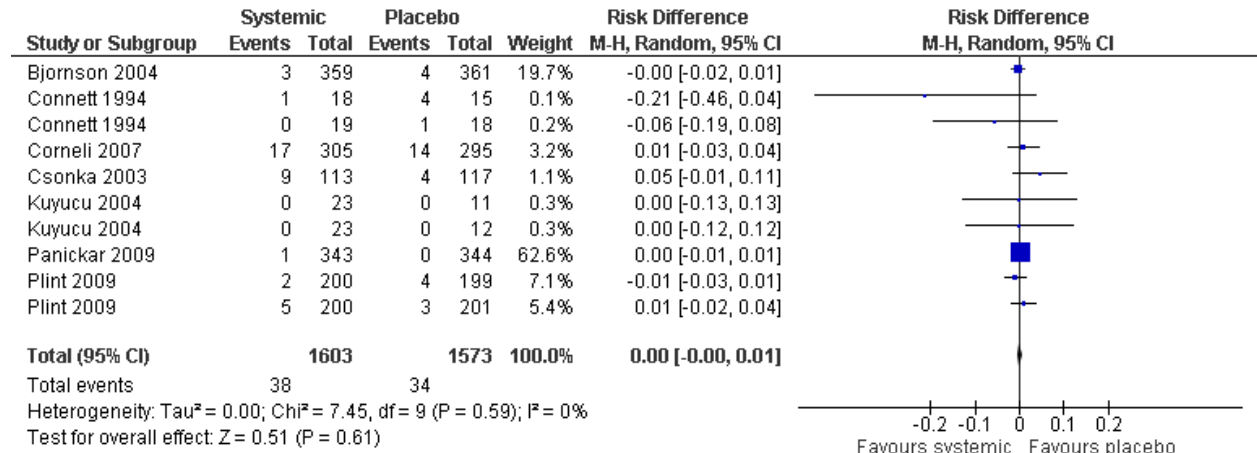

## Vomiting – Peto

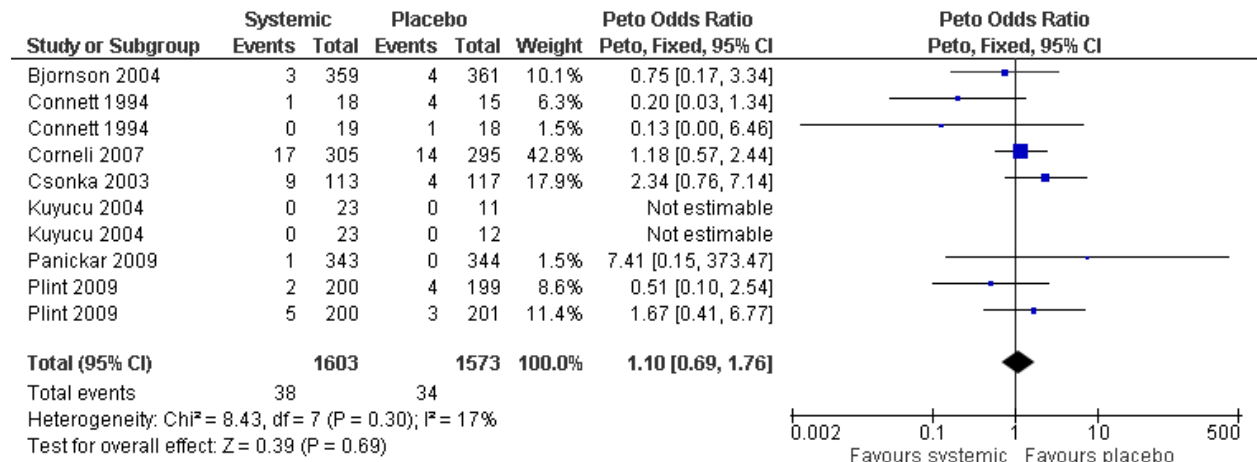



Vomiting (by dose)

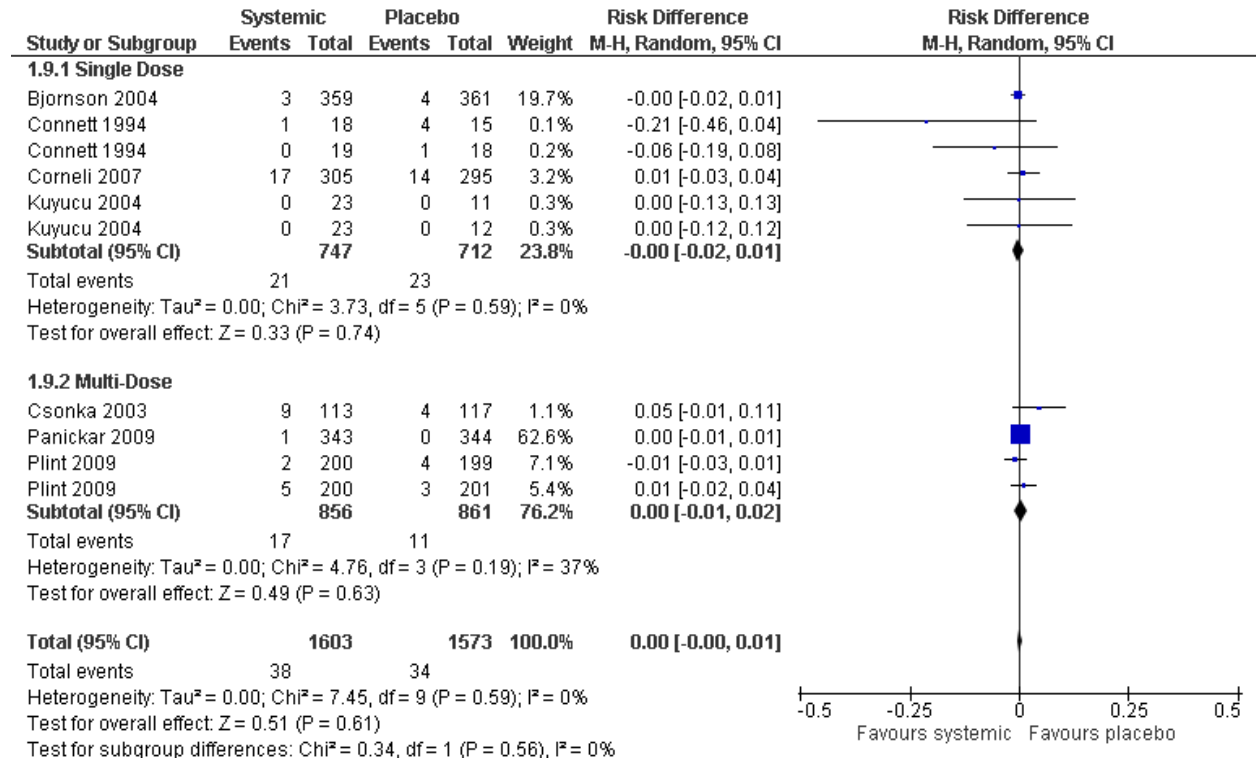

Vomiting (by dose) – Peto

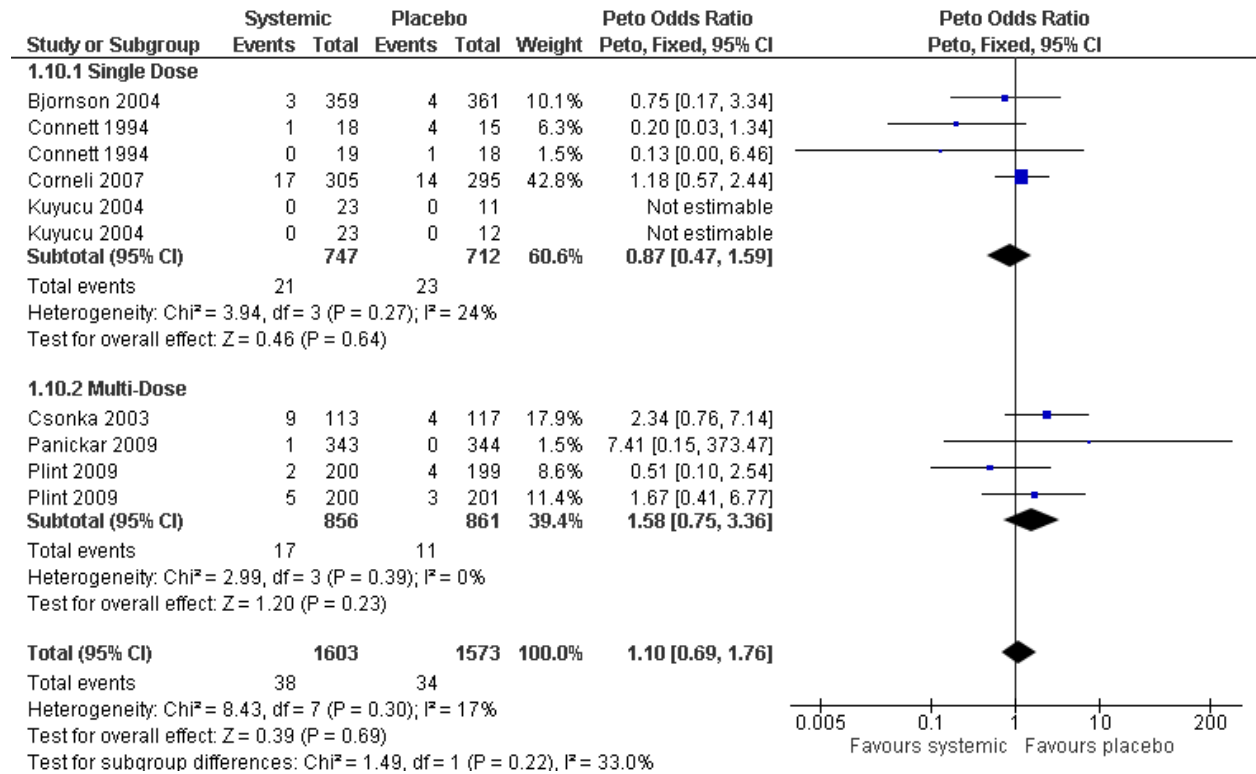

## Vomiting (by condition)

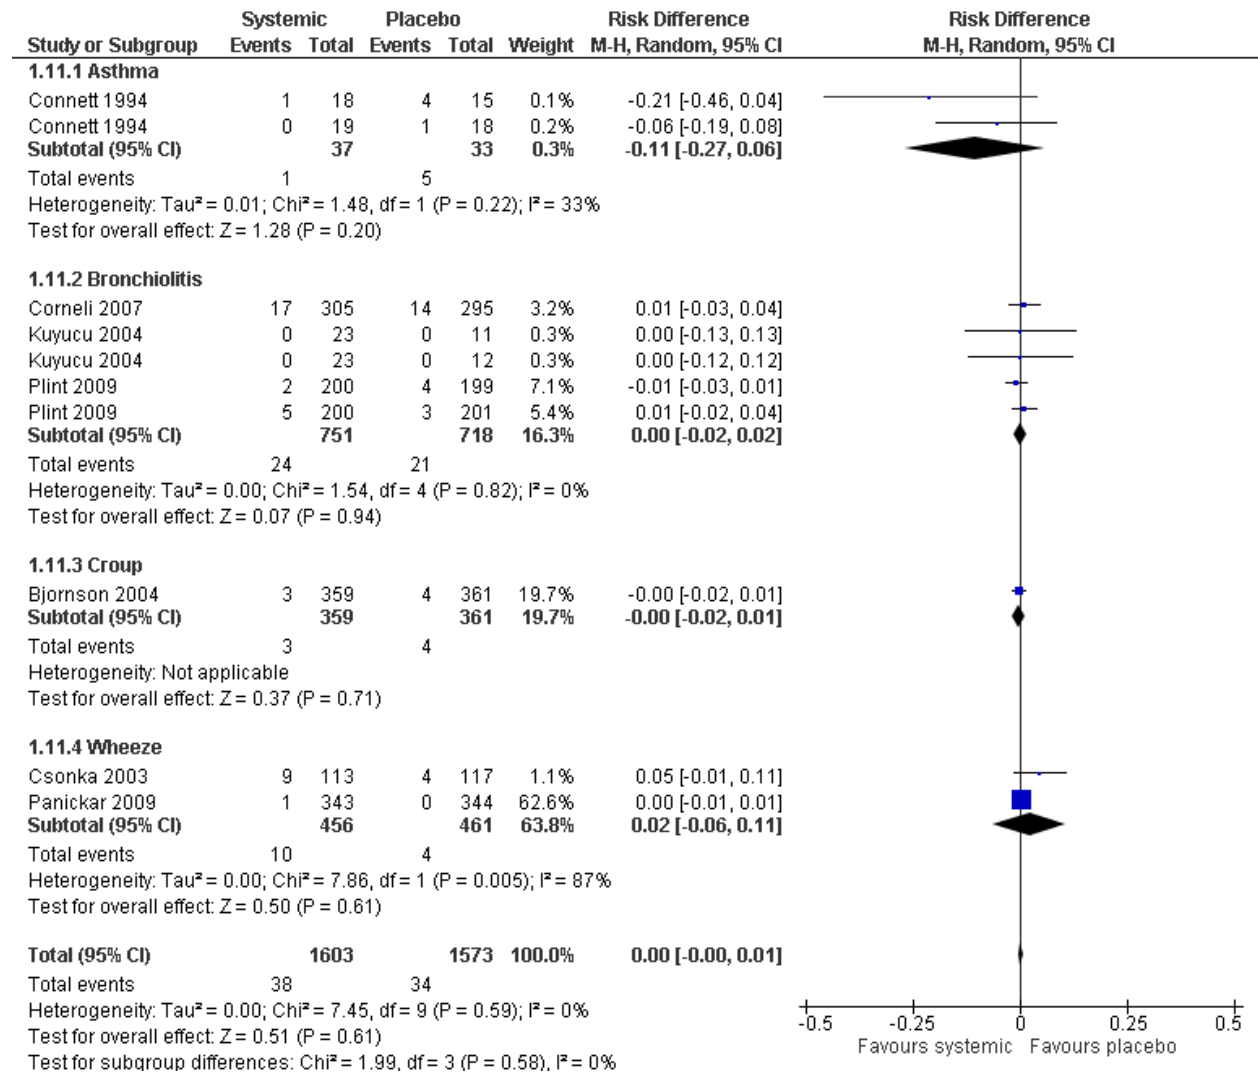

Vomiting (by condition) – Peto

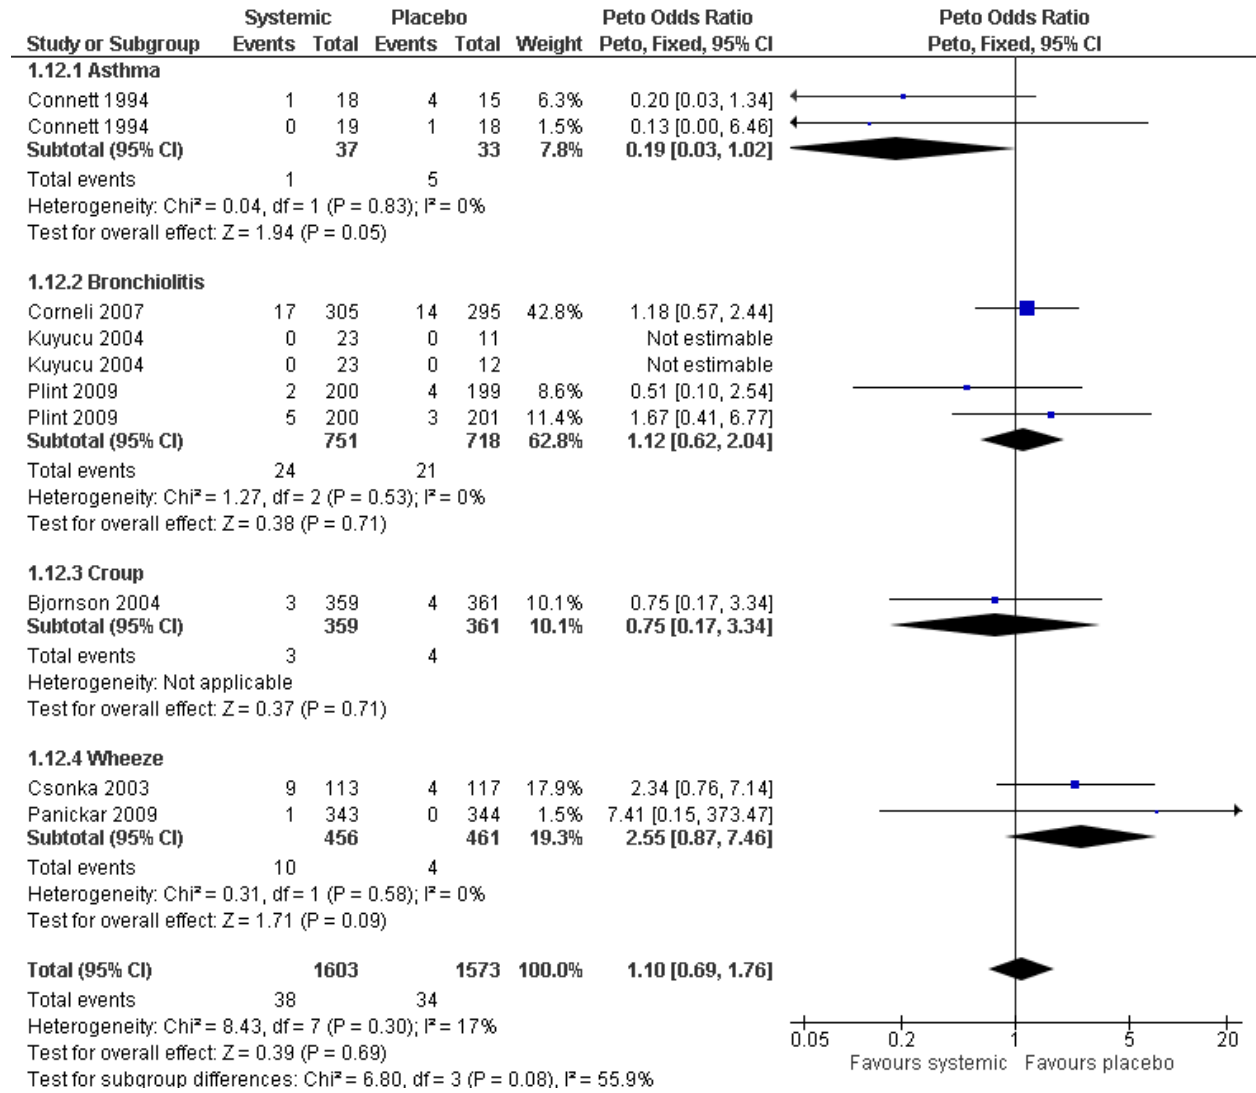

Abdominal pain

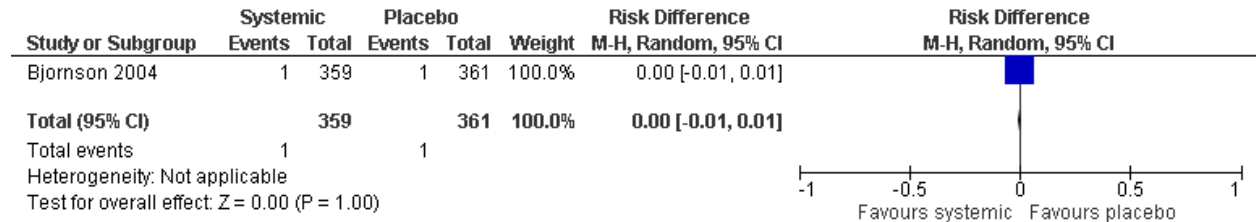

### Abdominal pain – Peto

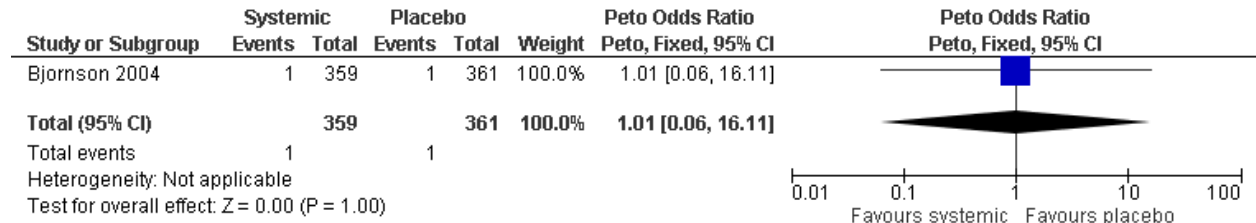

### Diarrhea

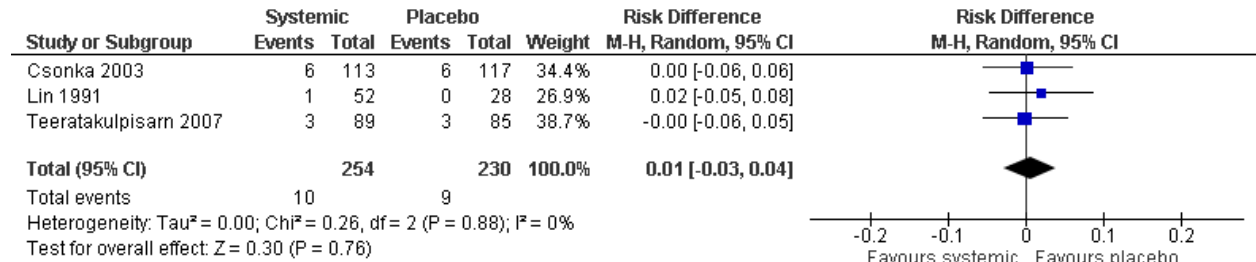

### Diarrhea – Peto

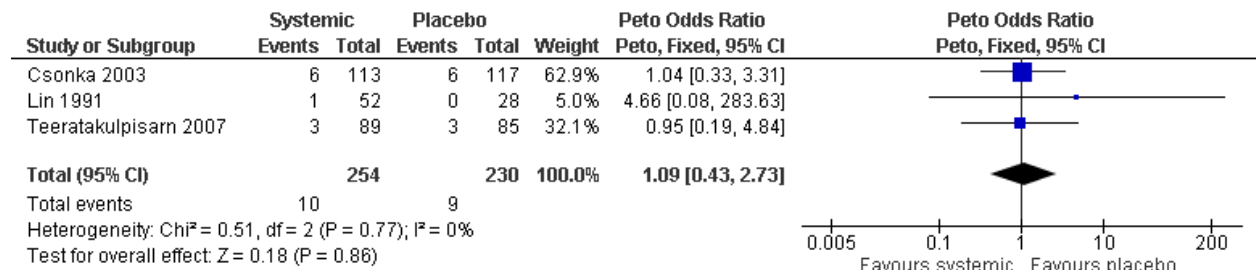

### Diarrhea (by dose)

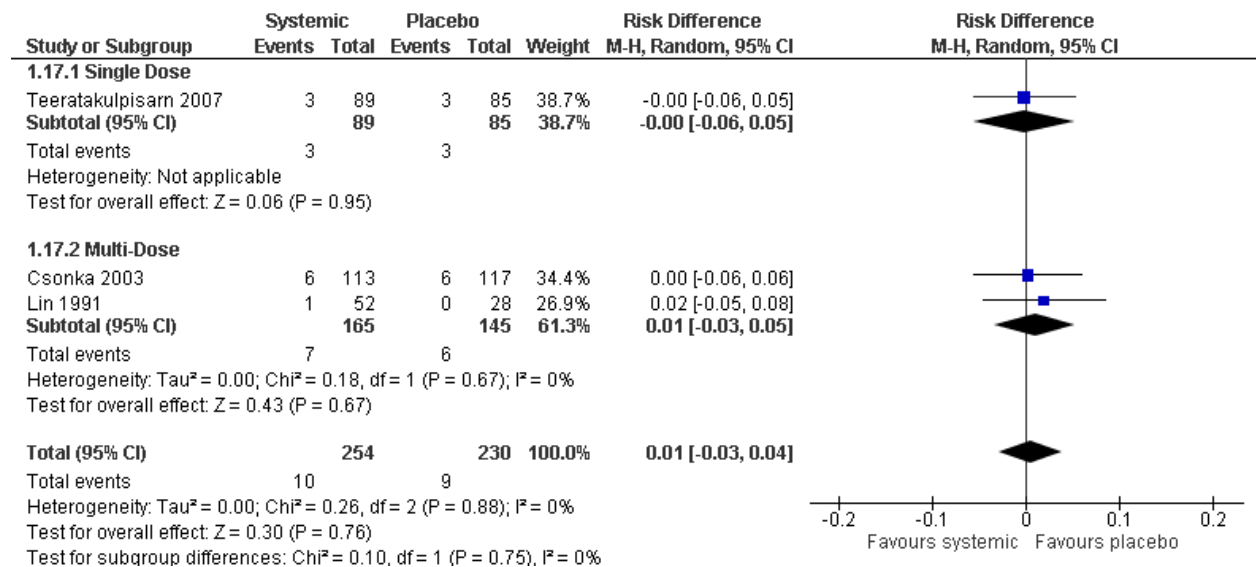

Diarrhea (by dose) – Peto

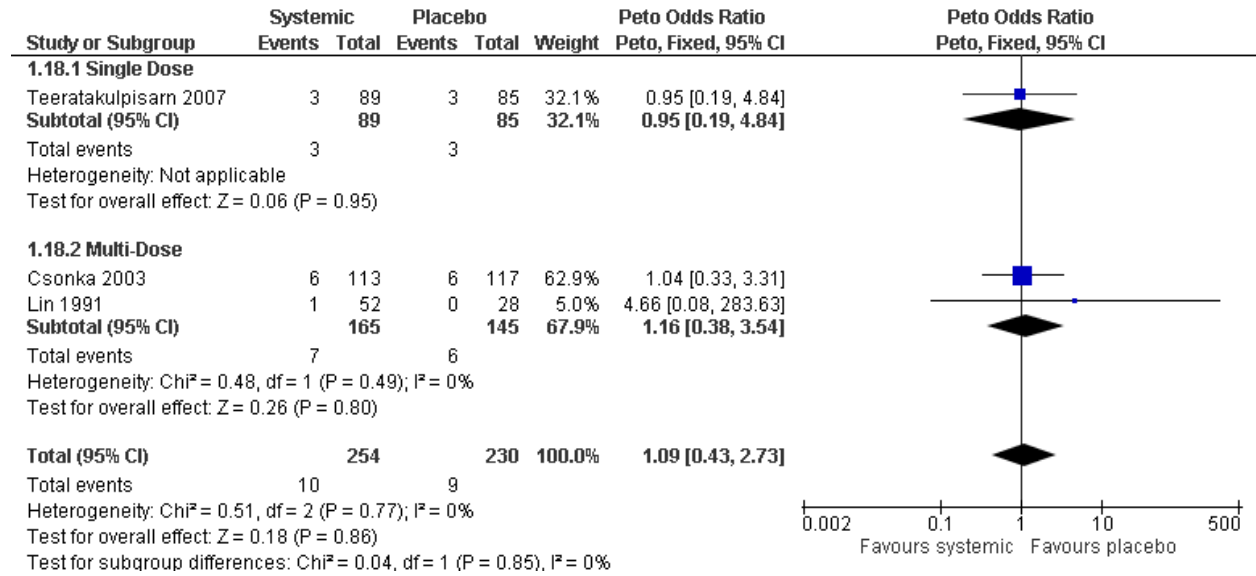

Diarrhea (by condition)

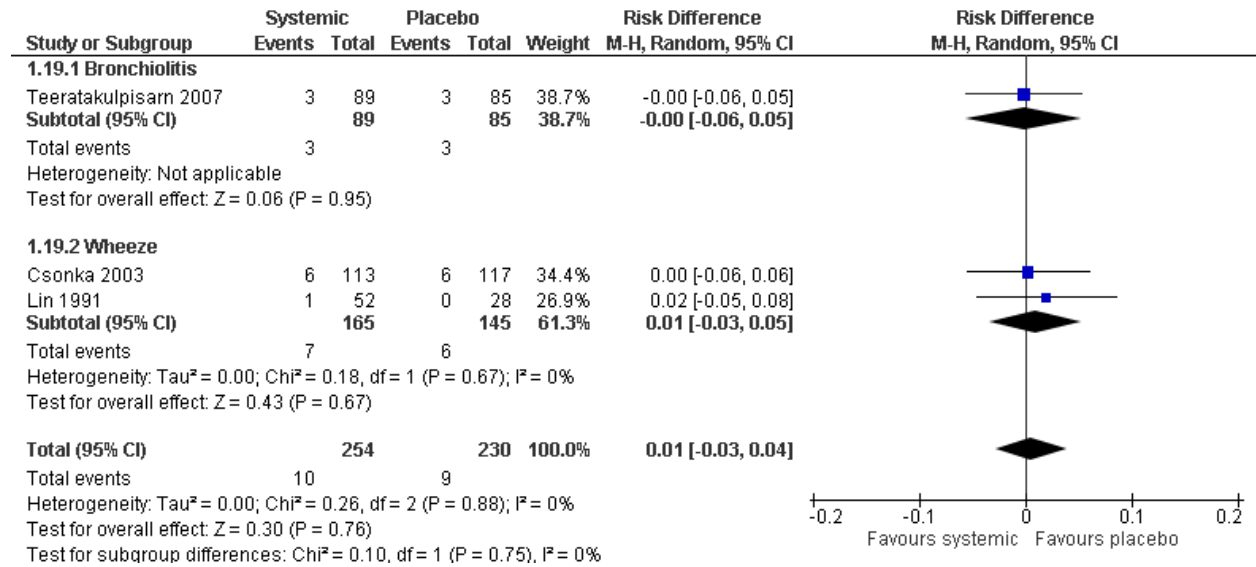

Diarrhea (by condition) – Peto

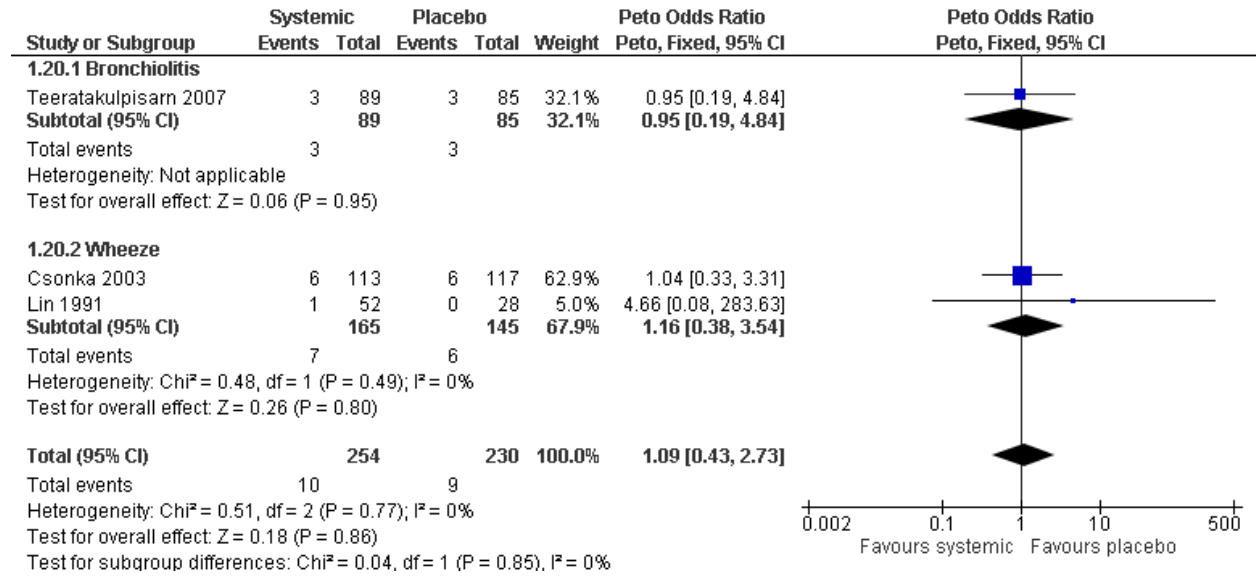

**SYSTEMIC vs. PLACEBO – CNS & Behaviour**

**Tremor/jitteriness**

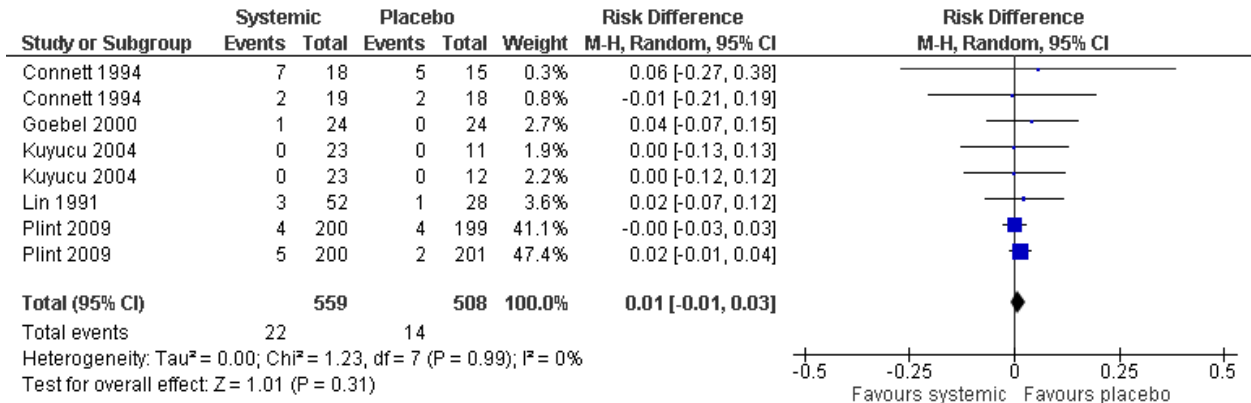

**Tremor/jitteriness – Peto**

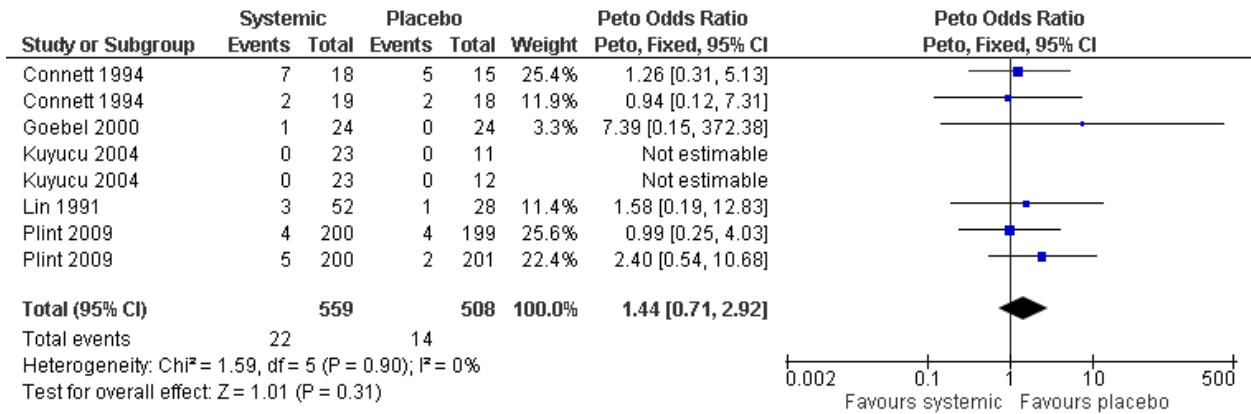

Tremor/jitteriness (by dose)

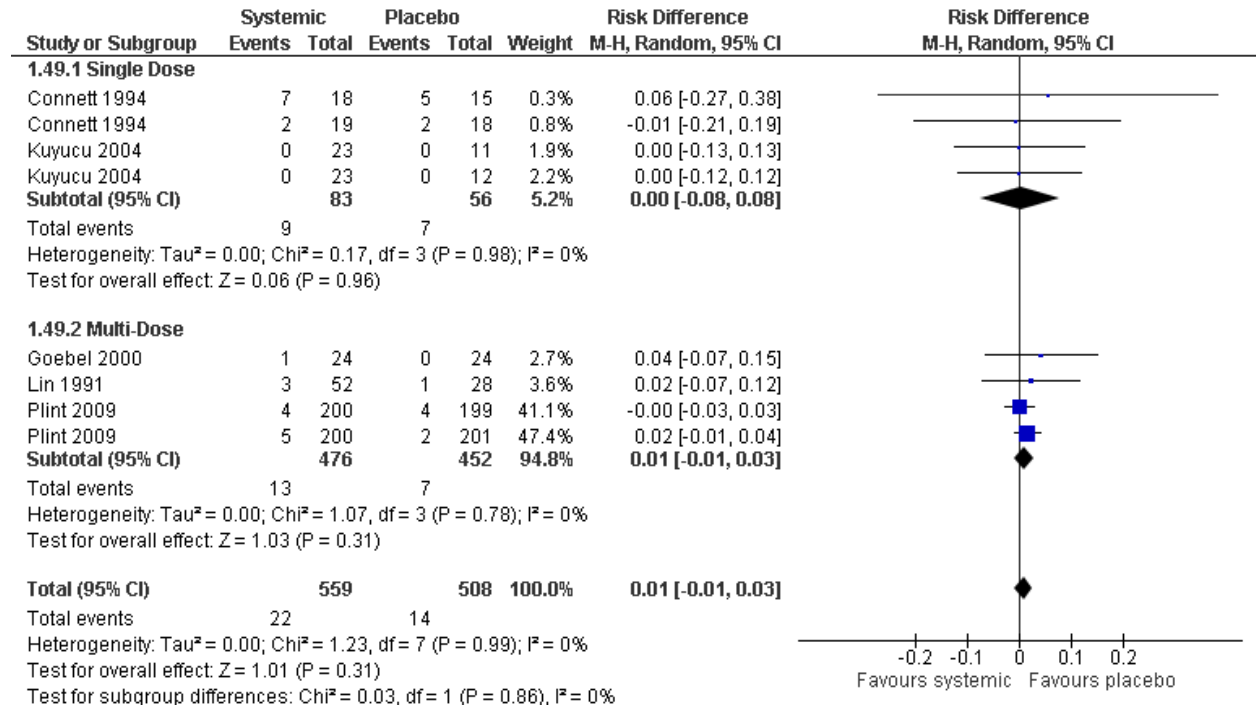

Tremor/jitteriness (by dose) – Peto

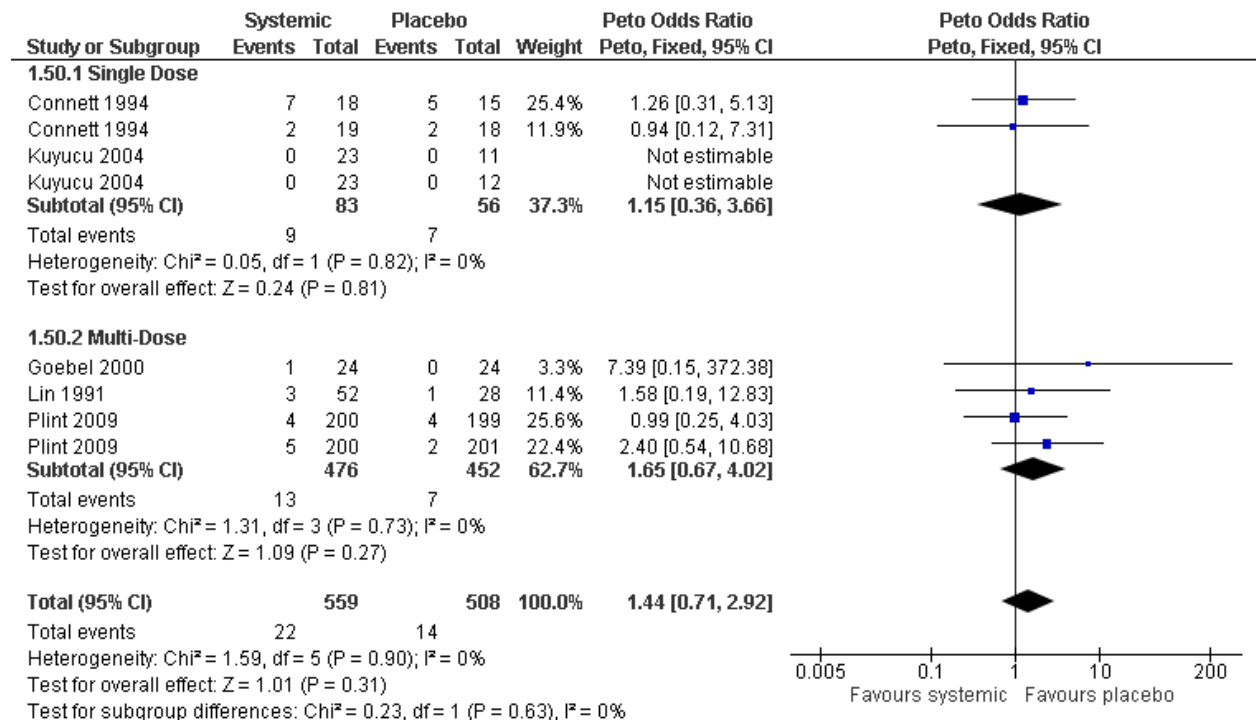



Tremor/jitteriness (by condition)

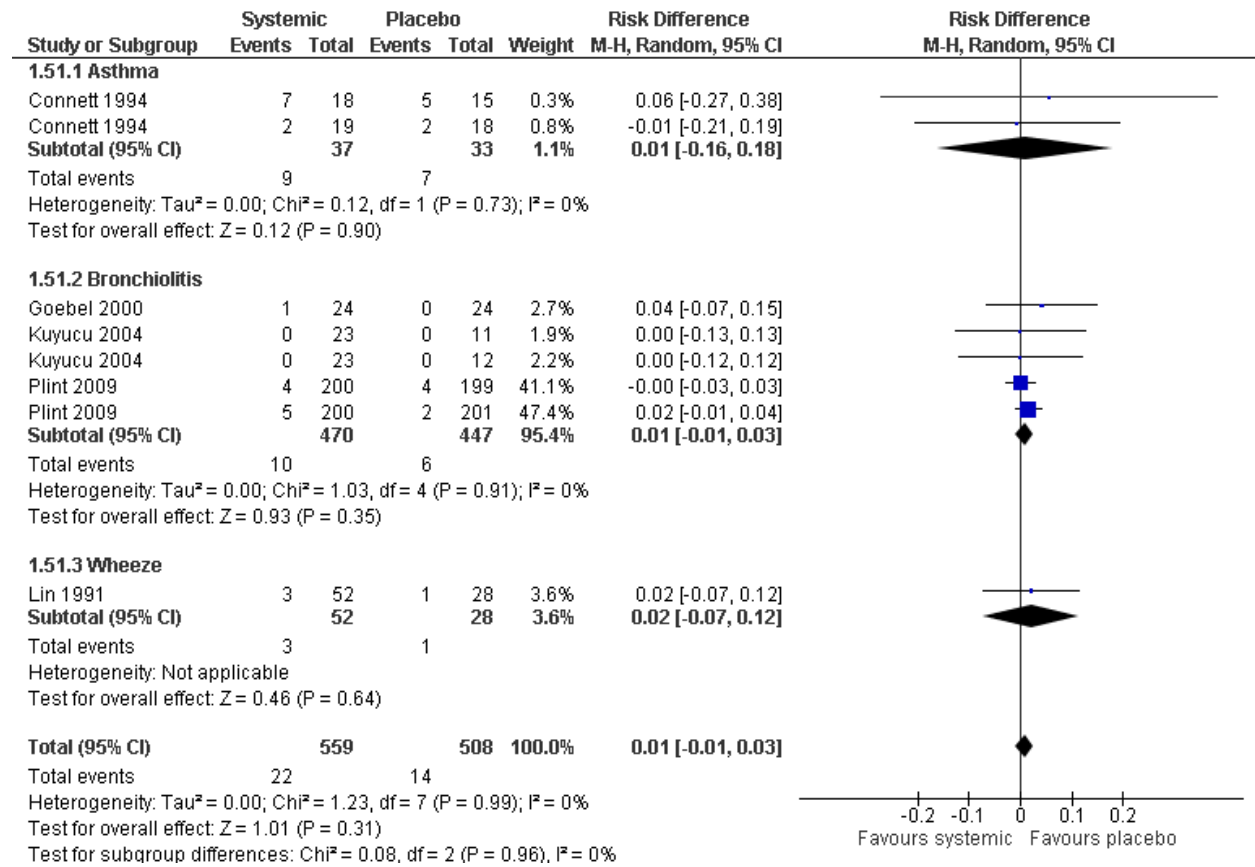

## Tremor/jitteriness (by condition) – Peto

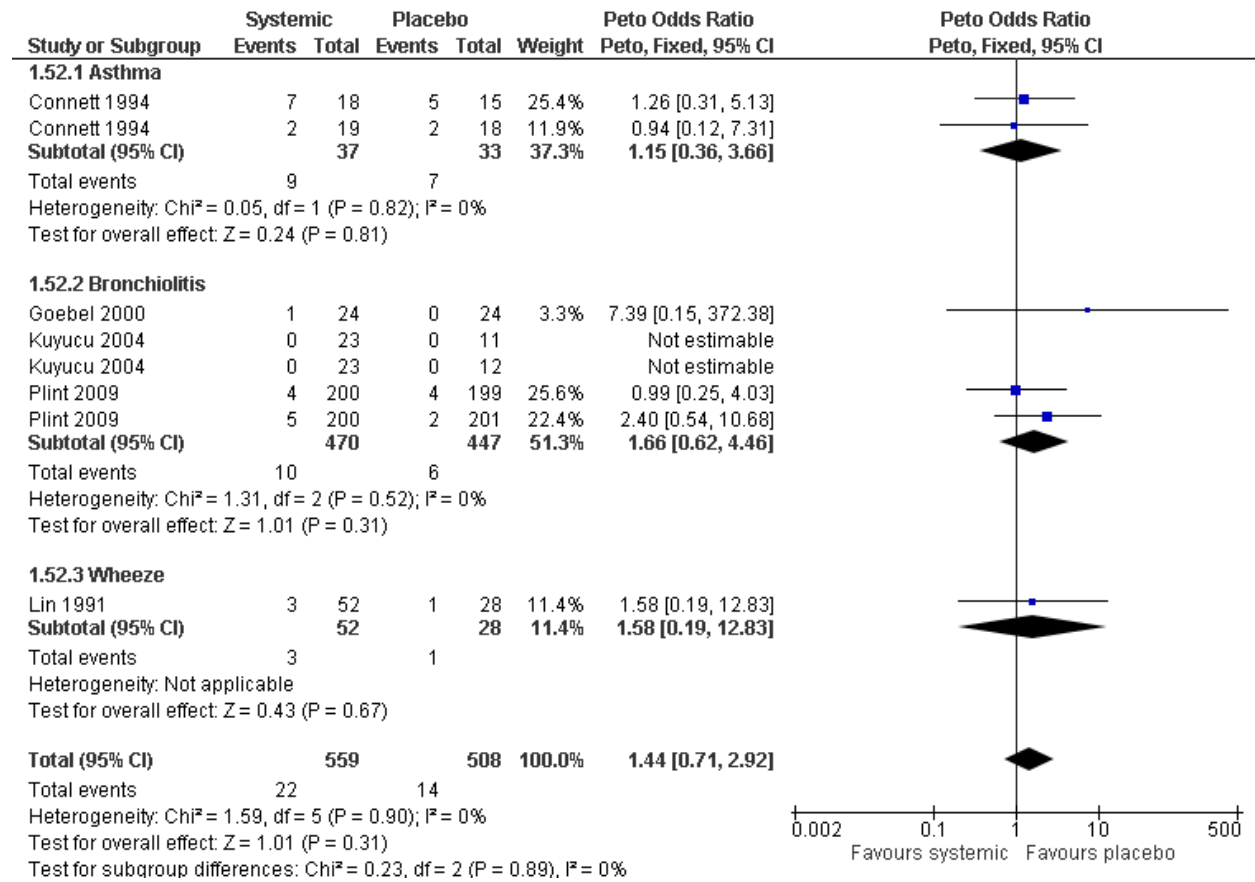

## Behaviour change

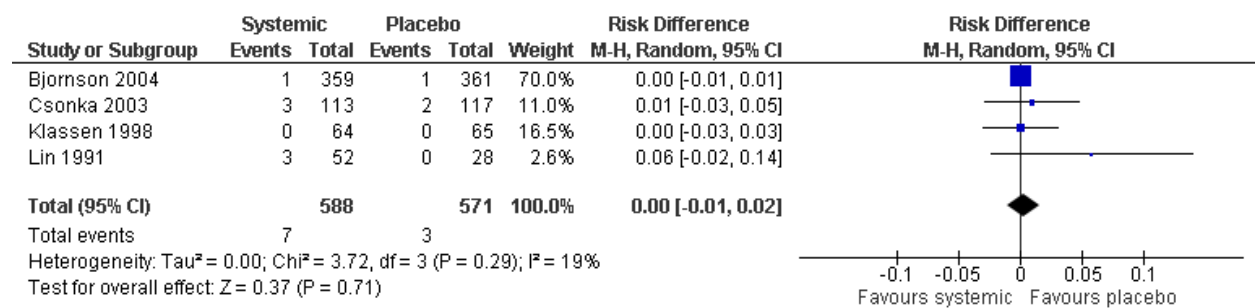

## Behaviour change – Peto

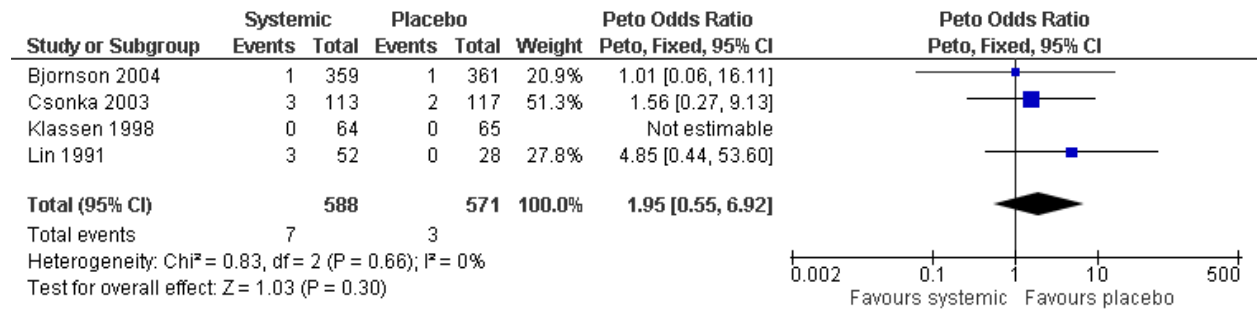

## Behaviour change (by dose)

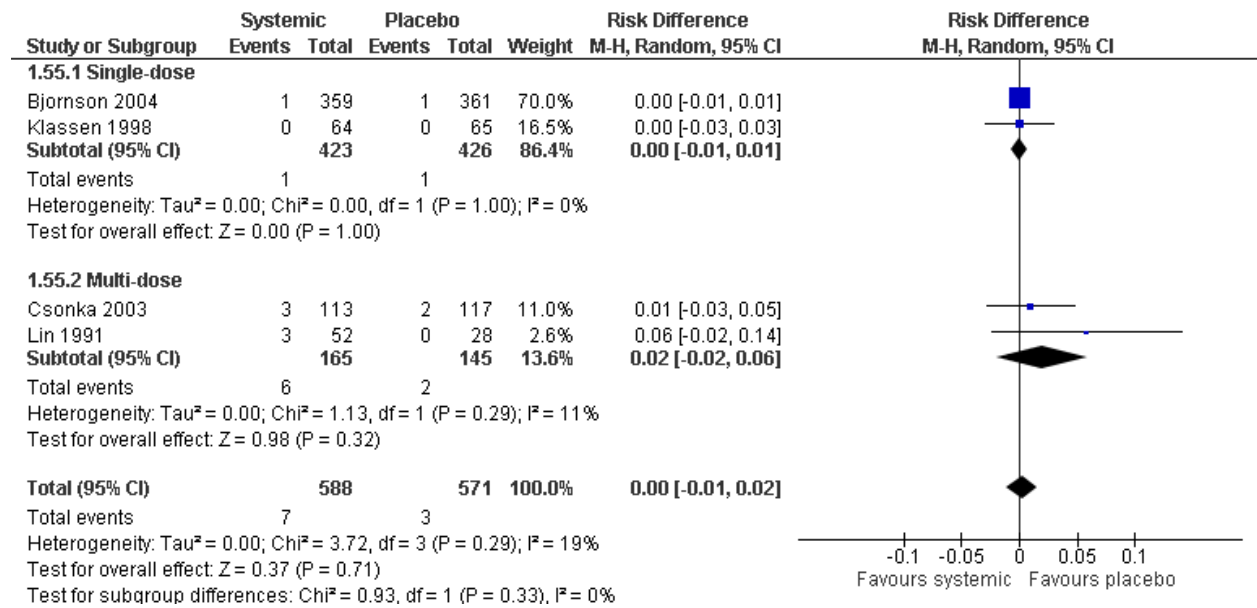

Behaviour change (by dose) – Peto

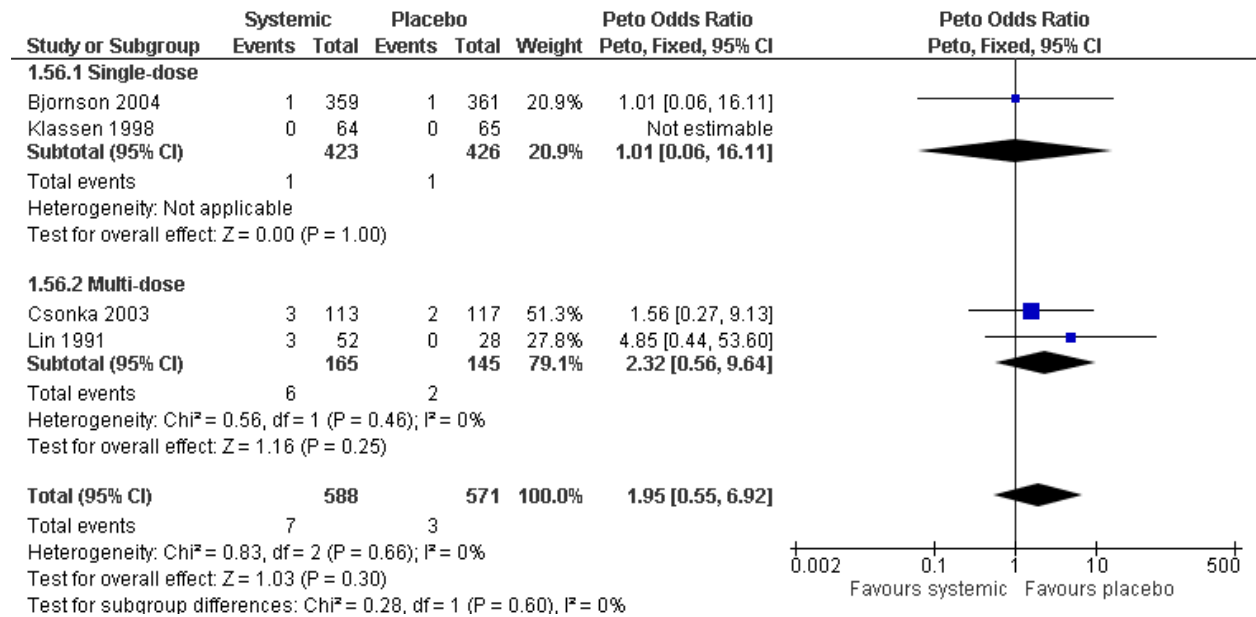

Behaviour change (by condition)

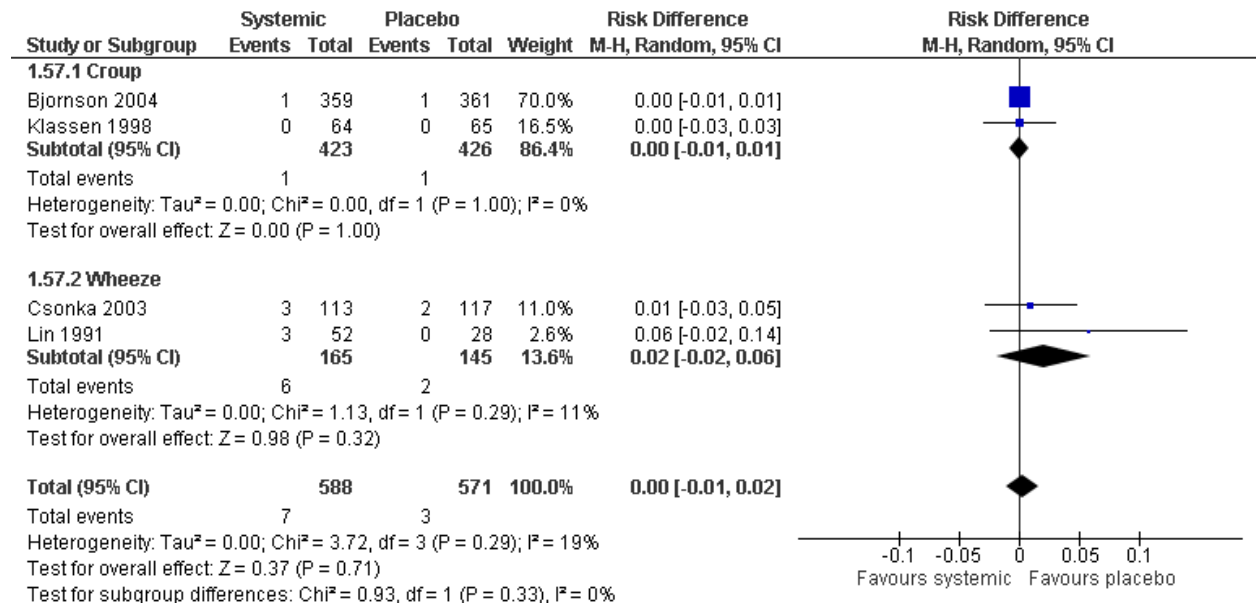

### Behaviour change (by condition) – Peto

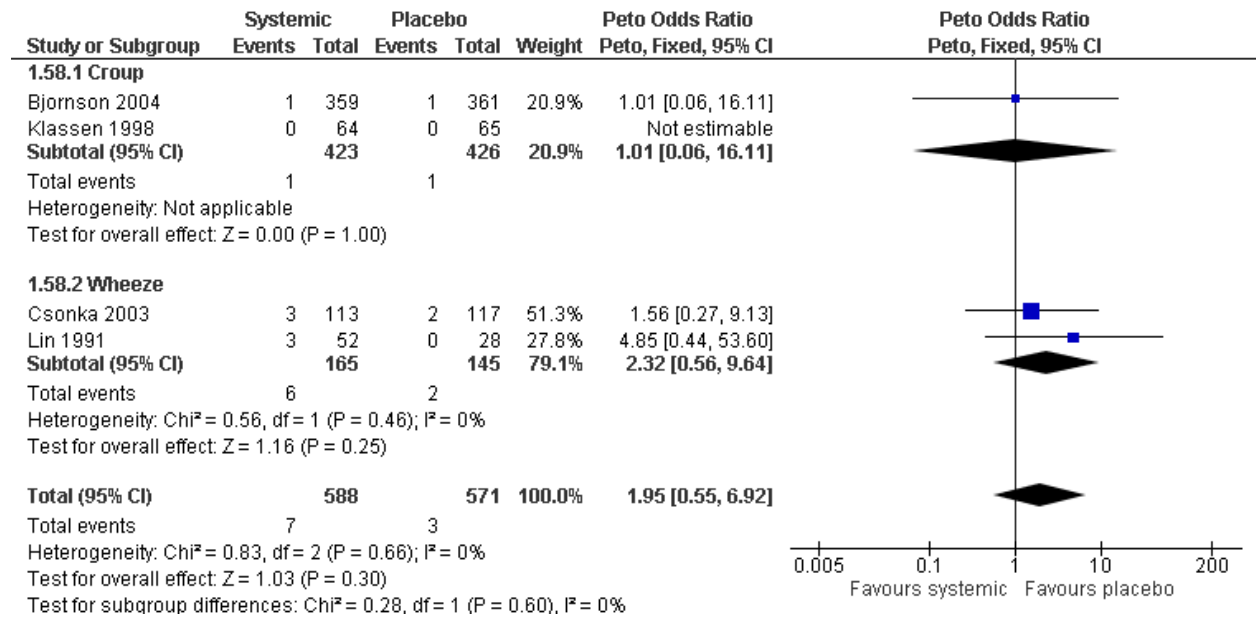

### Headache

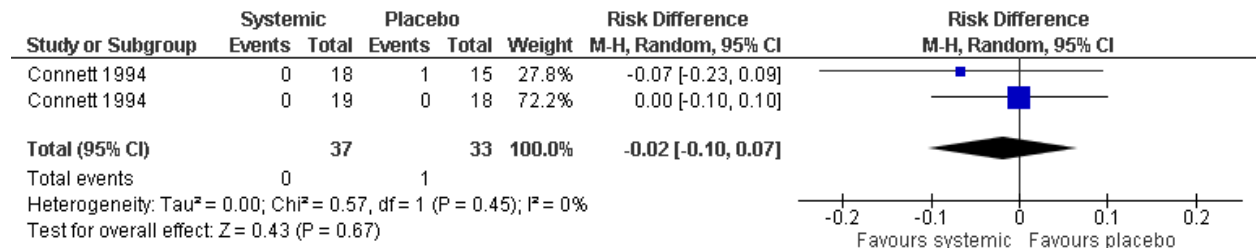

### Headache – Peto

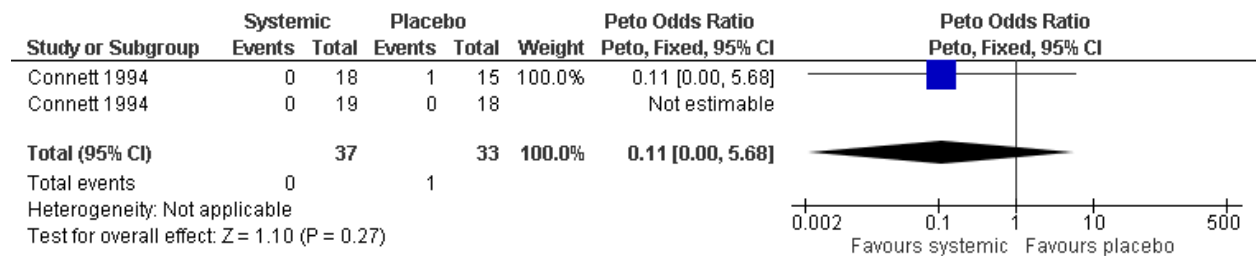

## SYSTEMIC vs. PLACEBO – Dermatologic

### Integument

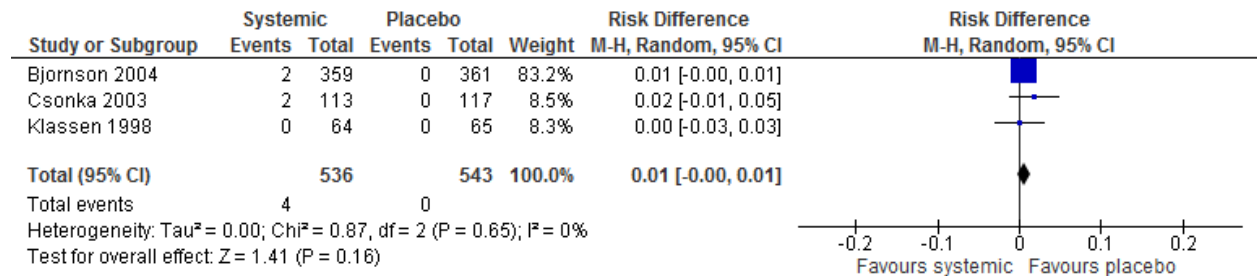

### Integument – Peto

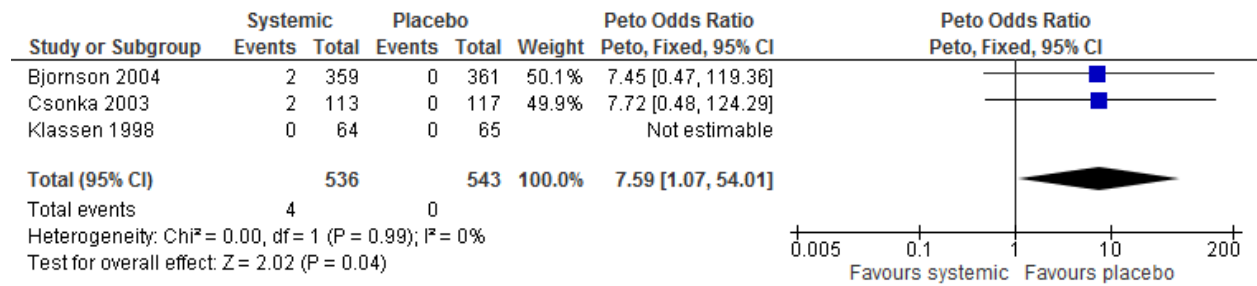

### Integument (by dose)

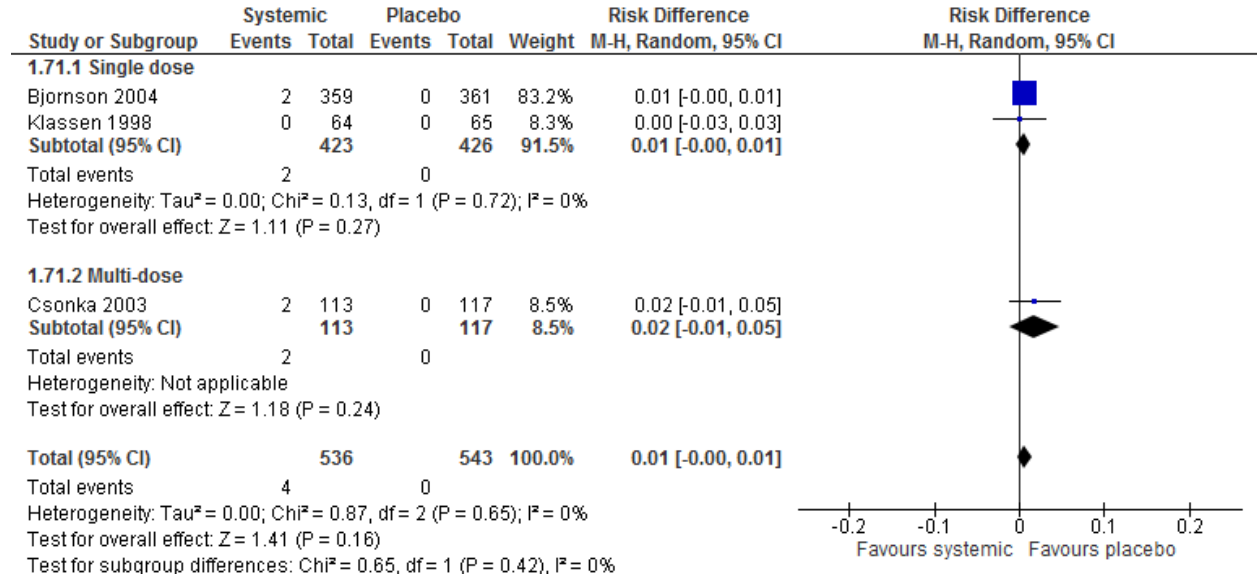

Integument (by dose) – Peto

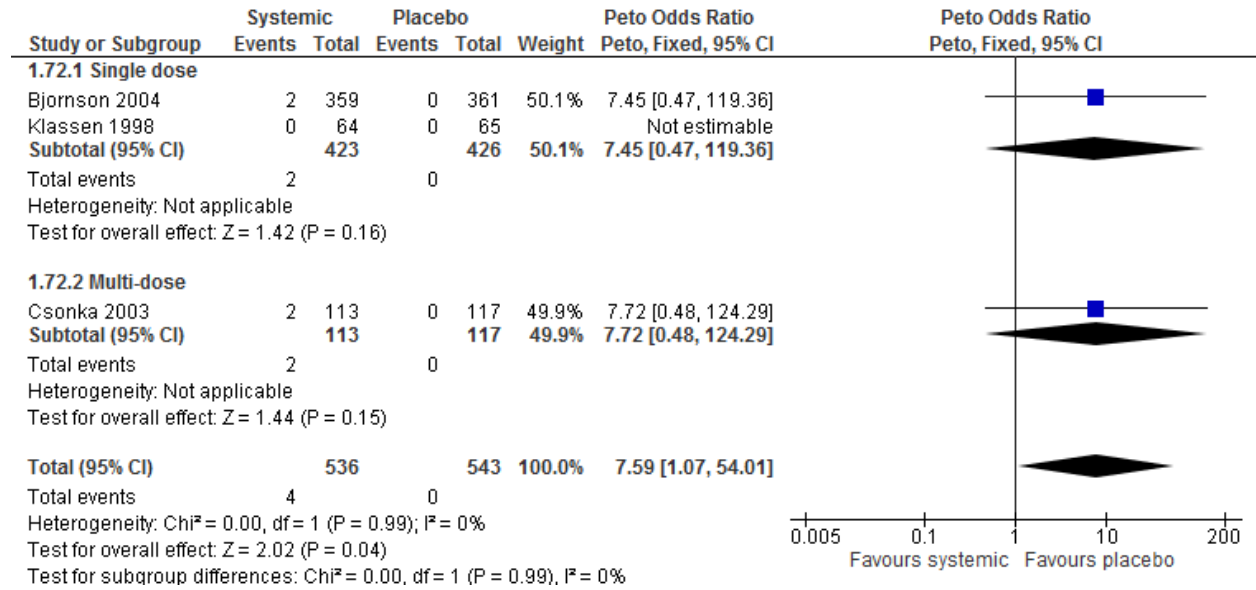

Integument (by condition)

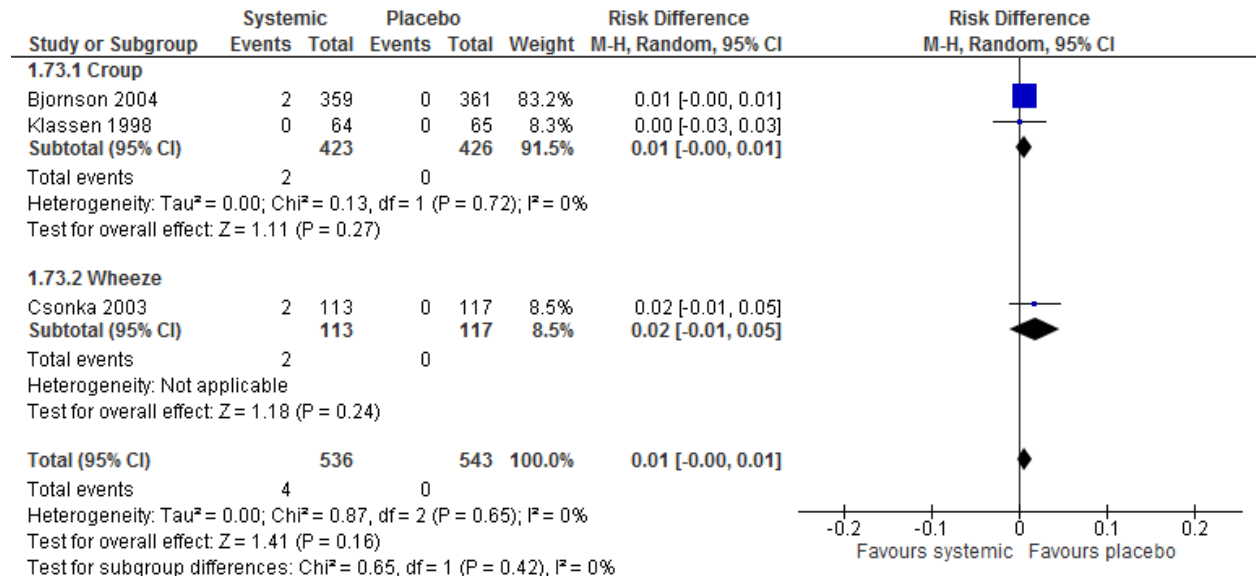

Integument (by condition) – Peto

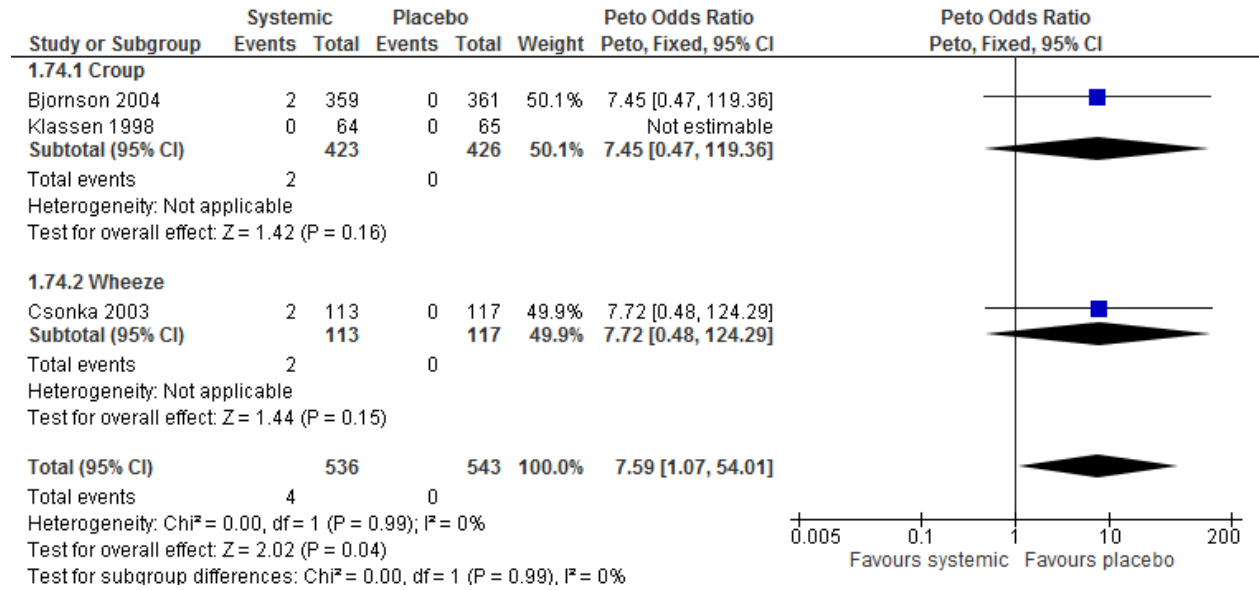



## SYSTEMIC vs. PLACEBO – Endocrine/Metabolic & Musculoskeletal

### Fluid & electrolyte abnormalities

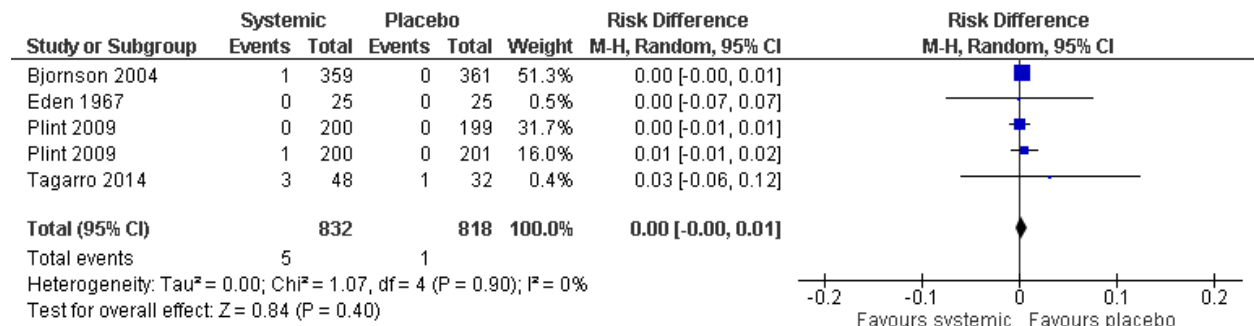

### Fluid & electrolyte abnormalities – Peto

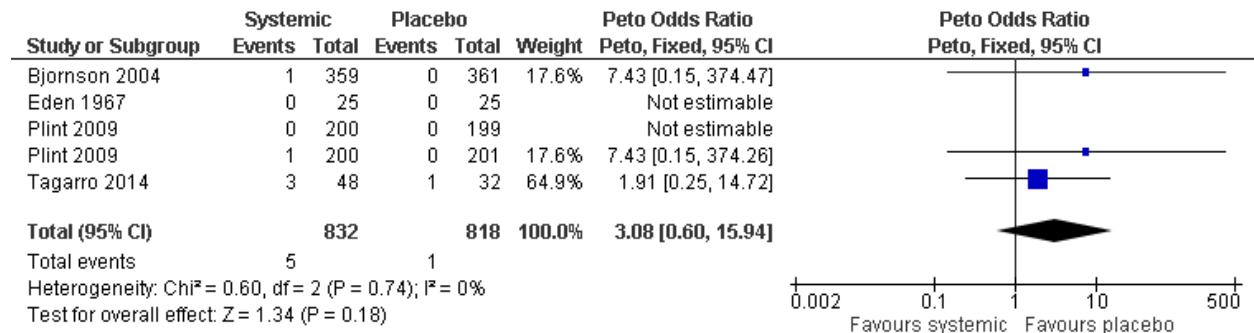

### Fluid & electrolyte abnormalities (by dose)

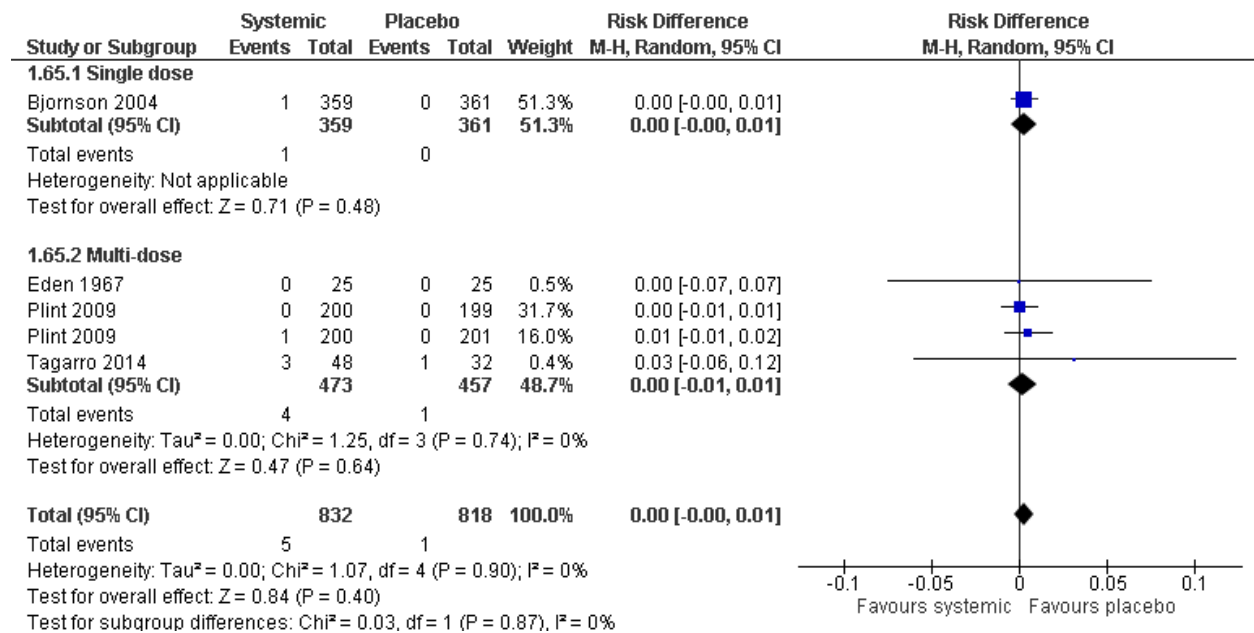

Fluid & electrolyte abnormalities (by dose) – Peto

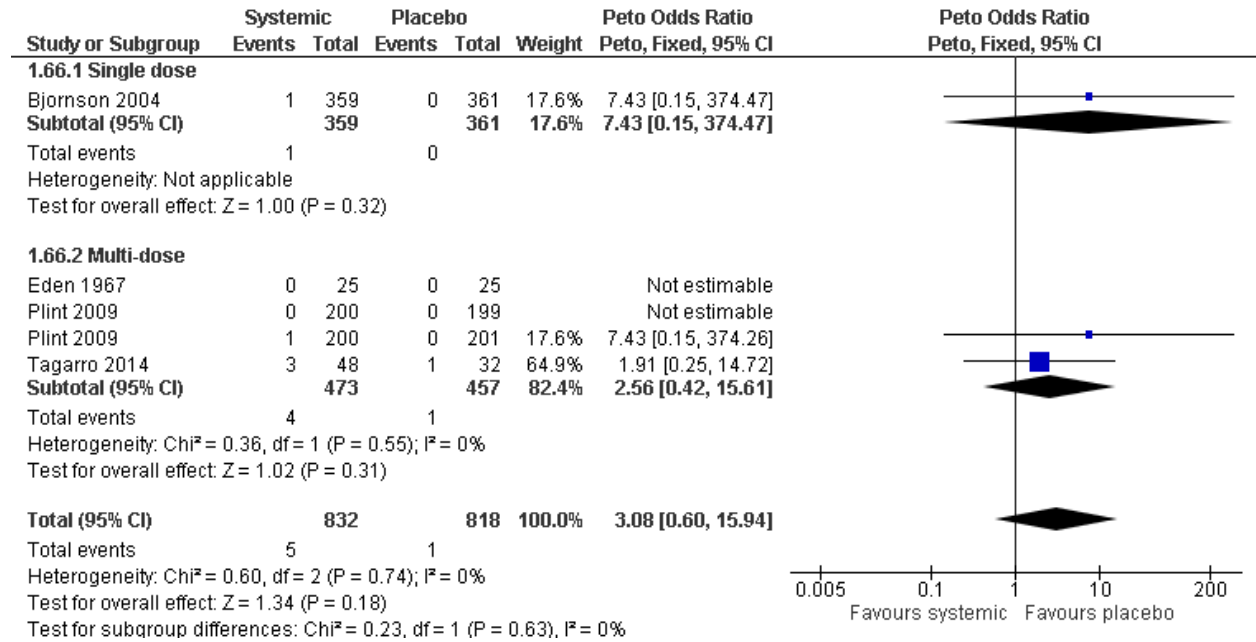

Fluid & electrolyte abnormalities (by condition)

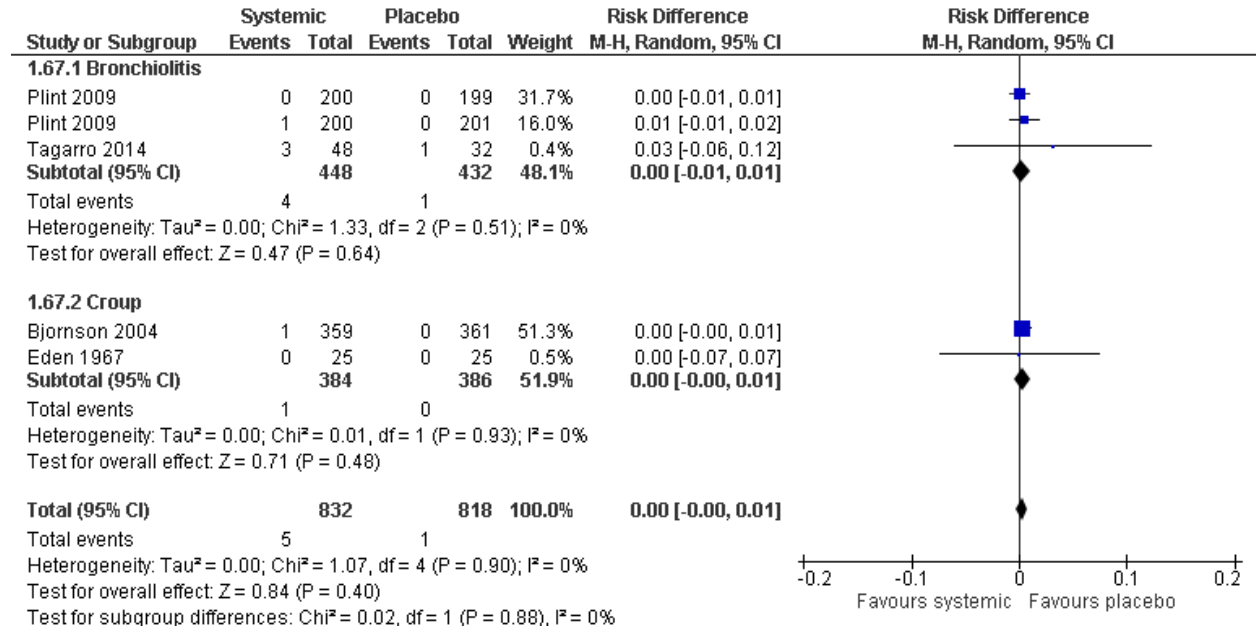

Fluid & electrolyte abnormalities (by condition) - Peto

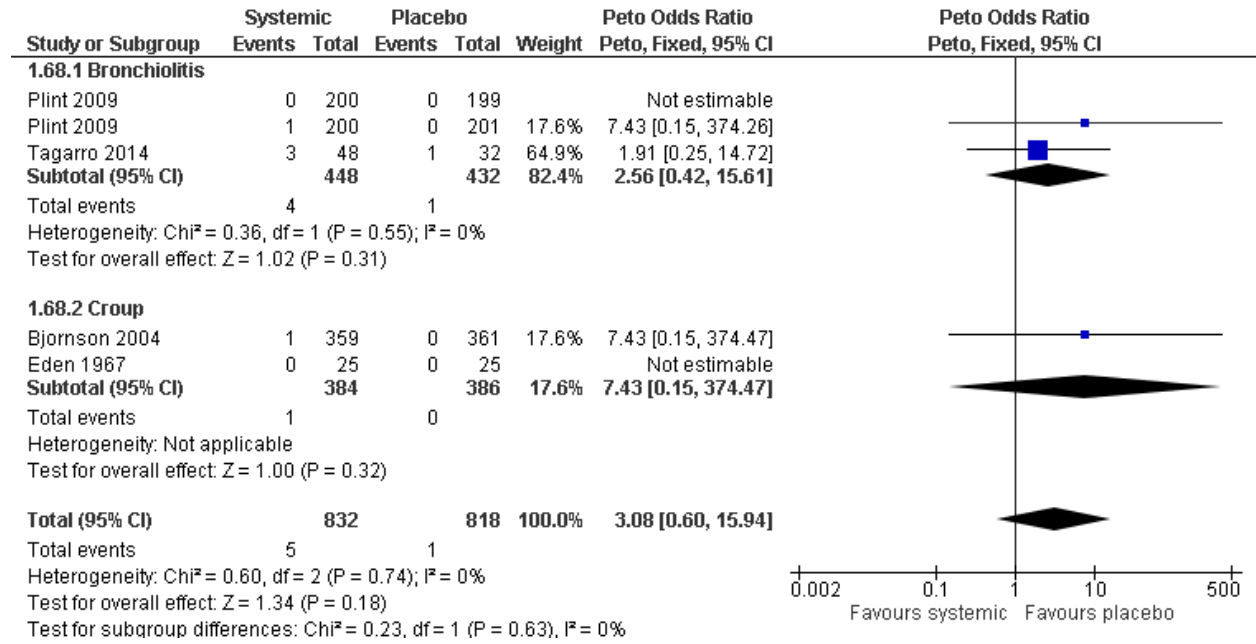

## SYSTEMIC vs. PLACEBO – Cardiovascular

### Arrhythmia

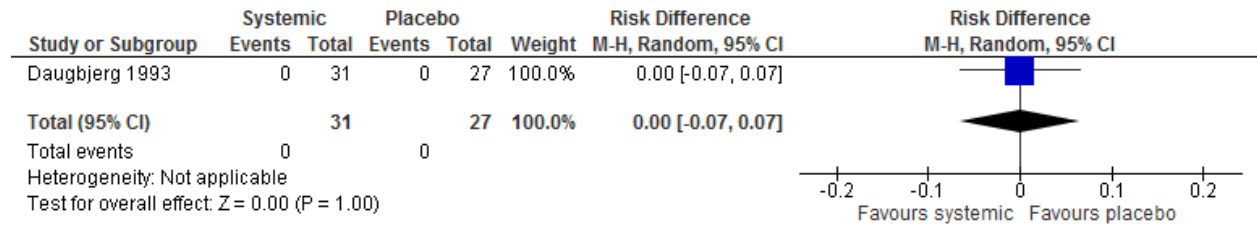

### Arrhythmia - Peto

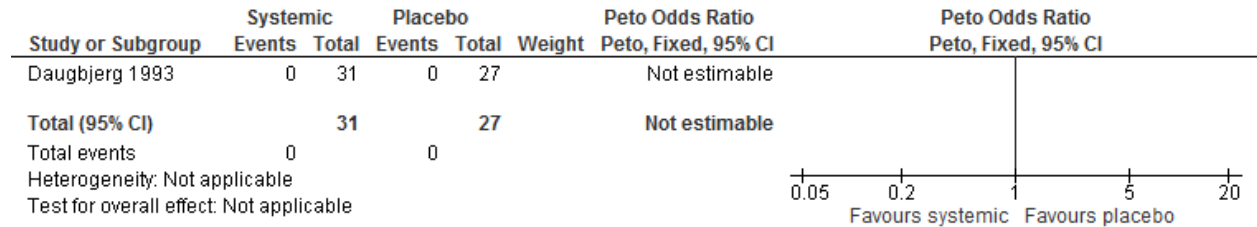

### Hypertension

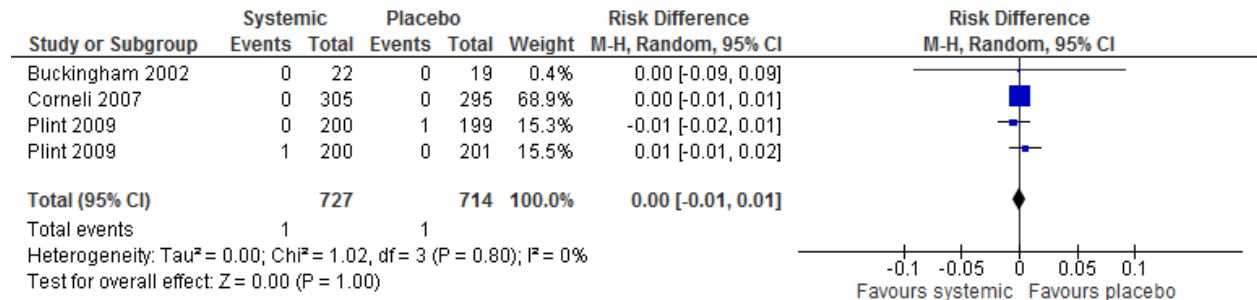

### Hypertension – Peto

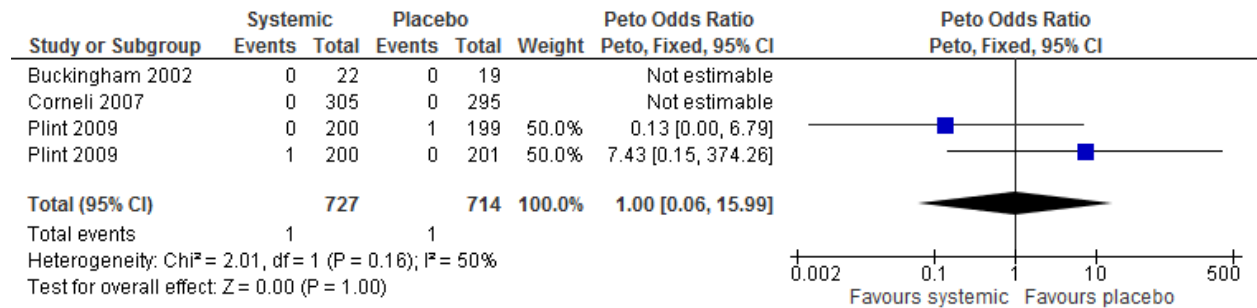

## Hypertension (by dose)

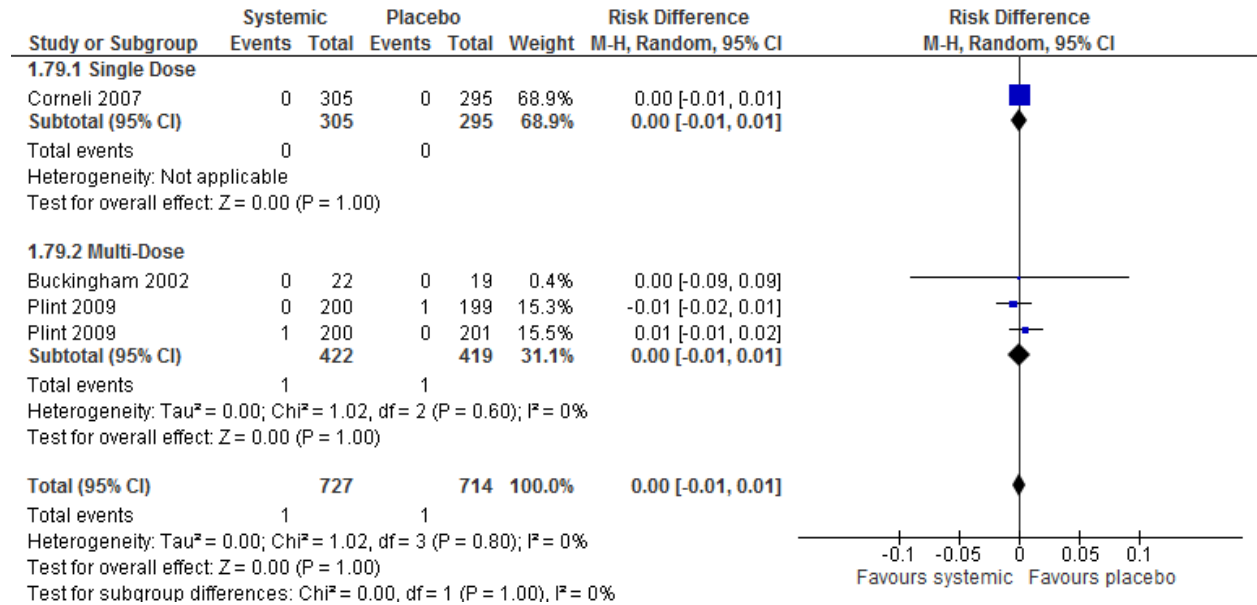

## Hypertension (by dose) - Peto

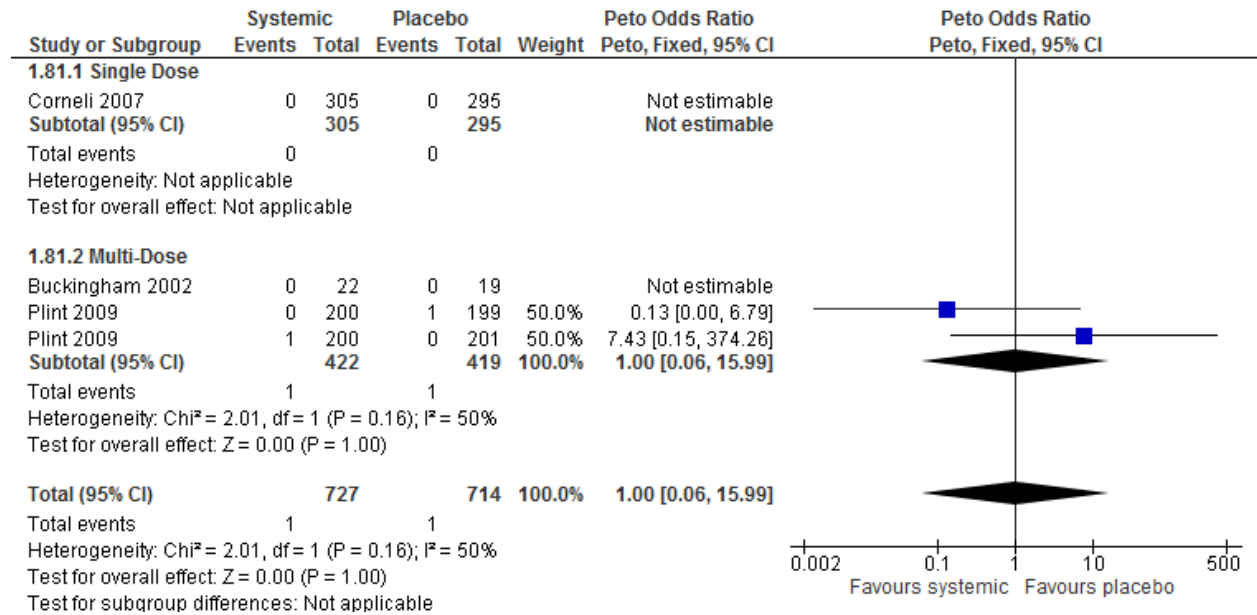

## Congestive heart failure

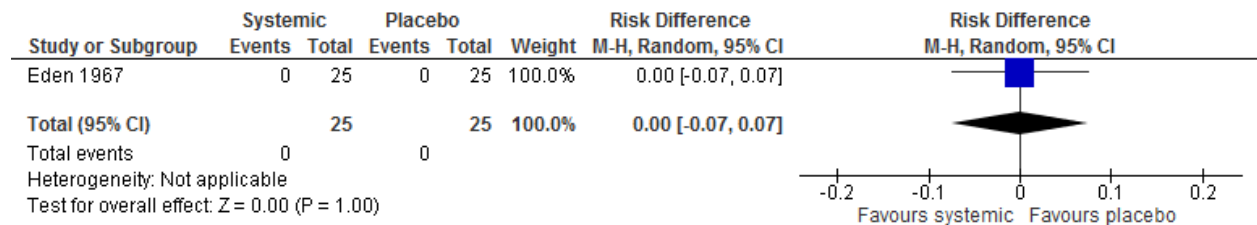

### Congestive heart failure - Peto

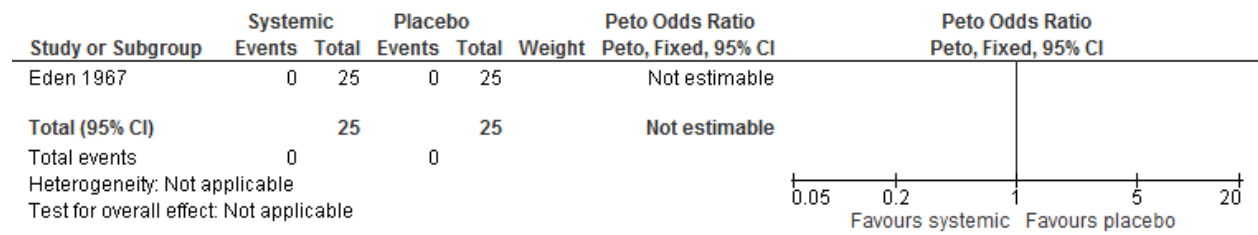

## SYSTEMIC vs. PLACEBO – General

### General complaints

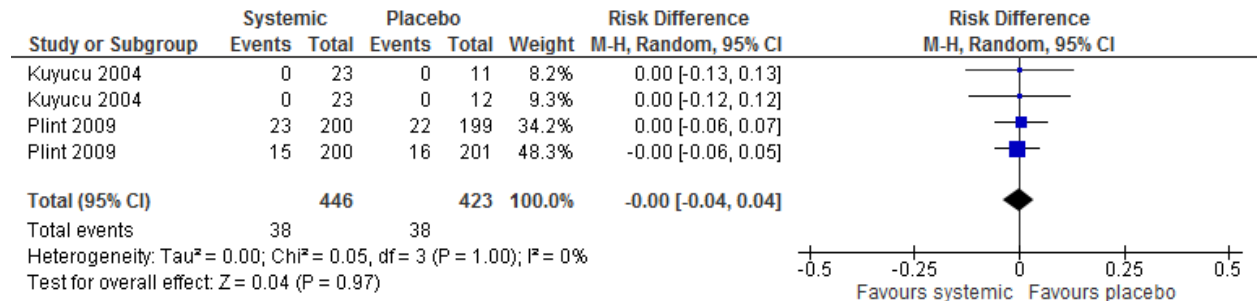

### General complaints – Peto

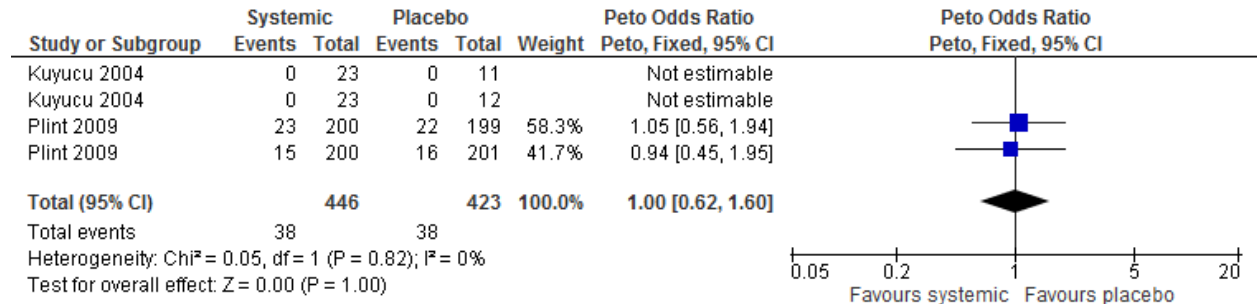

### General complaints (by dose)

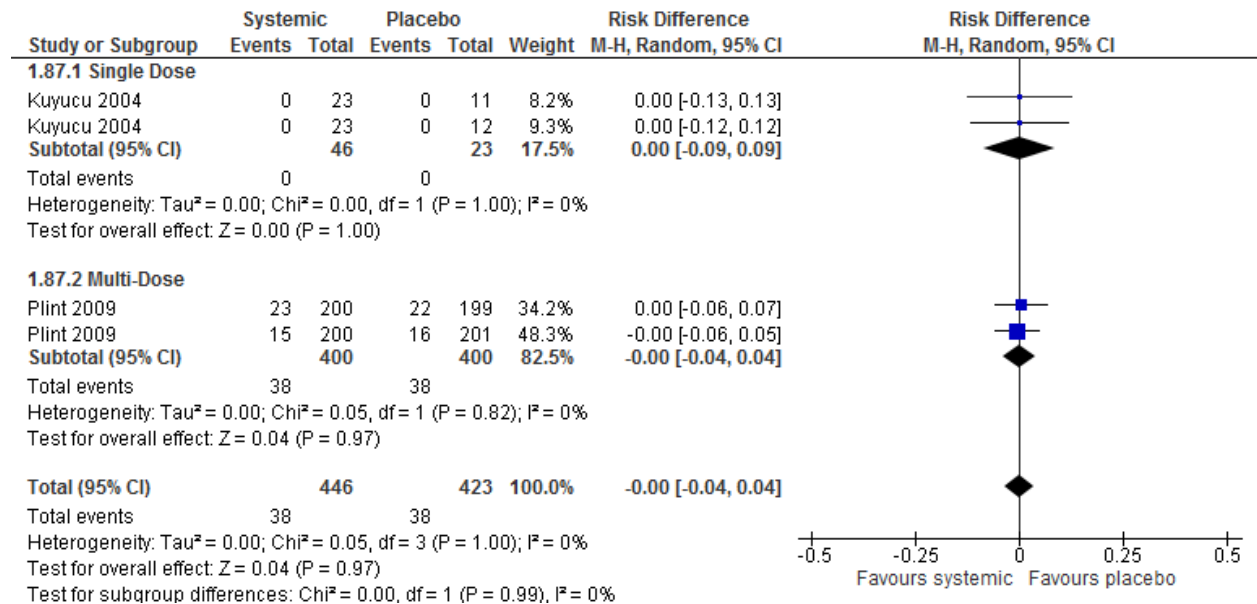

General complaints (by dose) – Peto

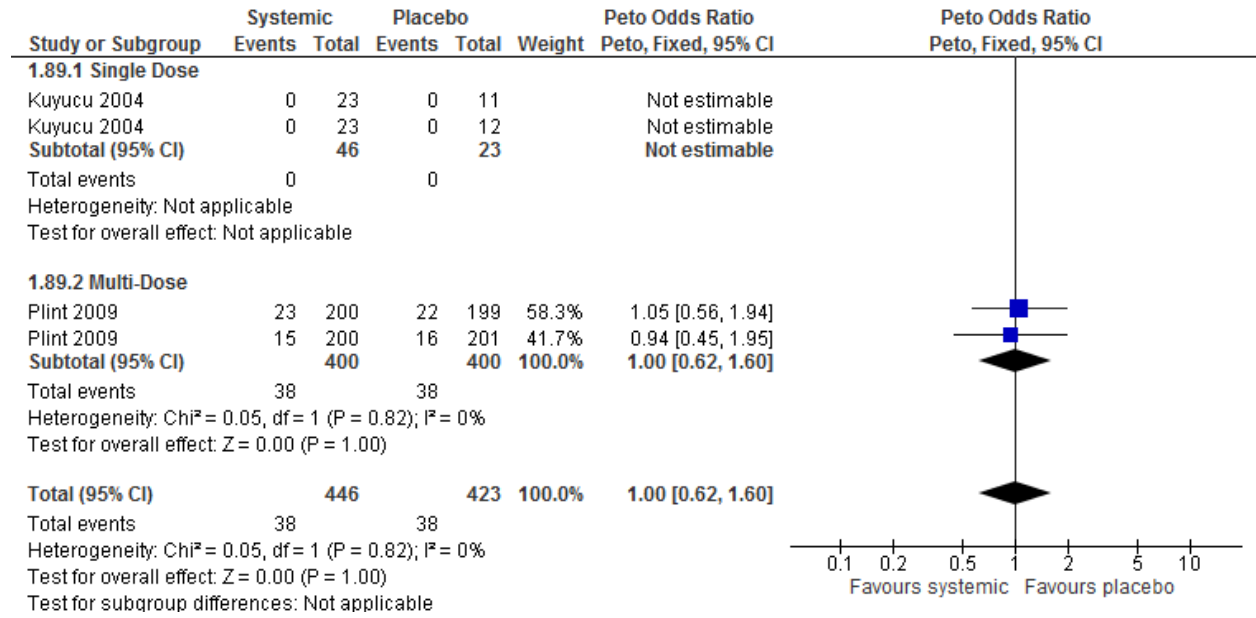



## SYSTEMIC vs. PLACEBO – Immune System

### Immunosuppression

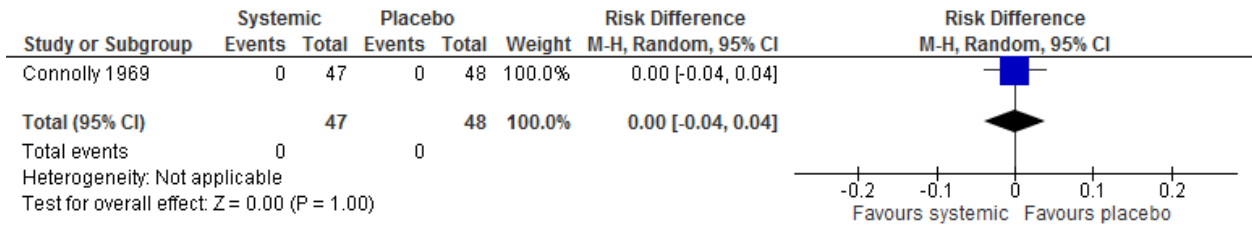

### Immunosuppression – Peto

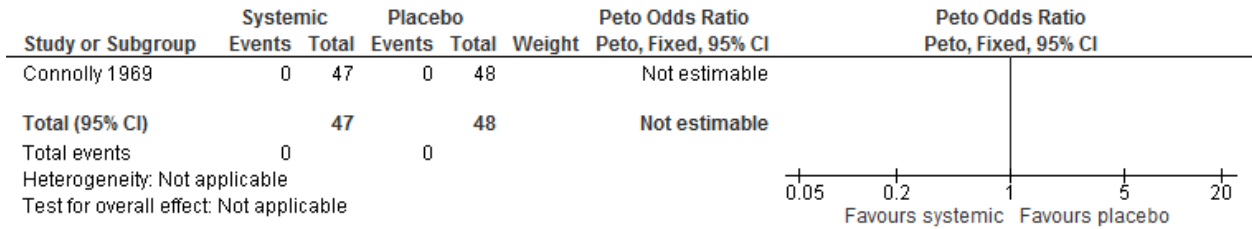

## INHALED vs. PLACEBO – Infection & Respiratory

### Severe infections

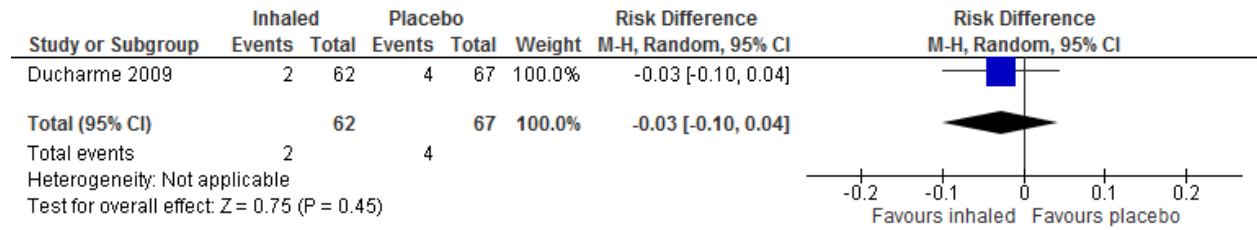

### Severe infections – Peto

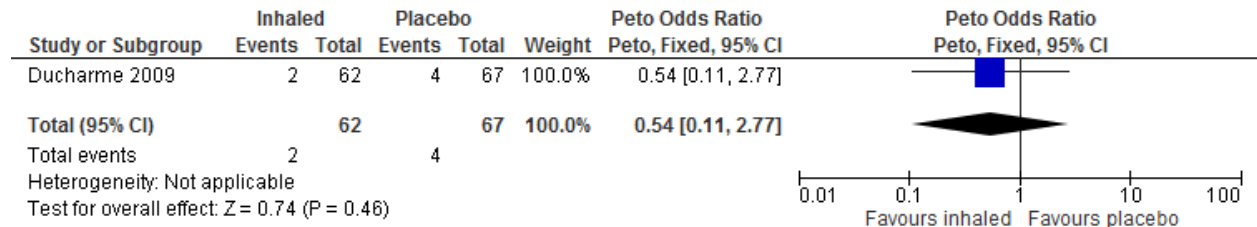

### Systemic infections

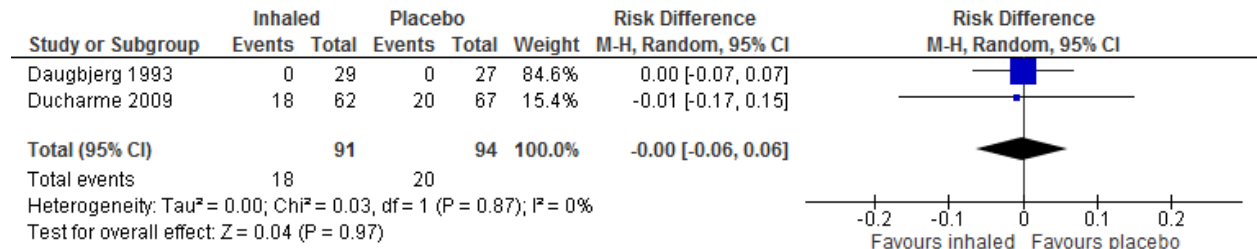

### Systemic infections – Peto

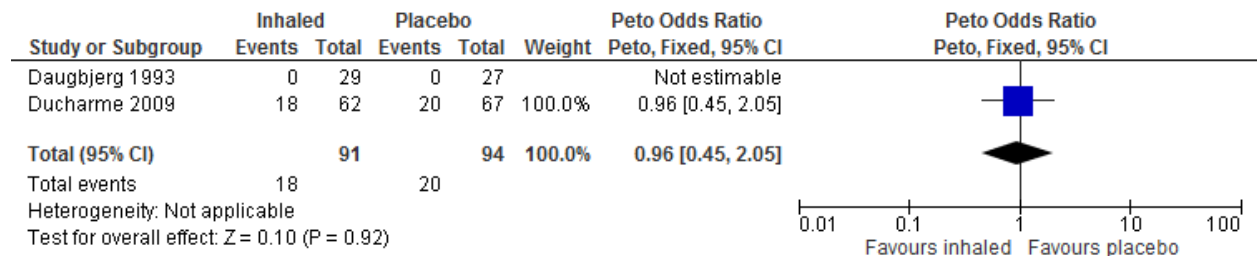

### Lung/trachea

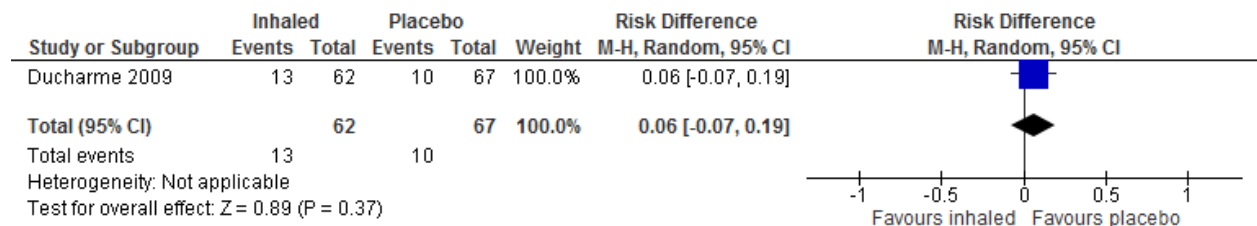

Lung/trachea – Peto

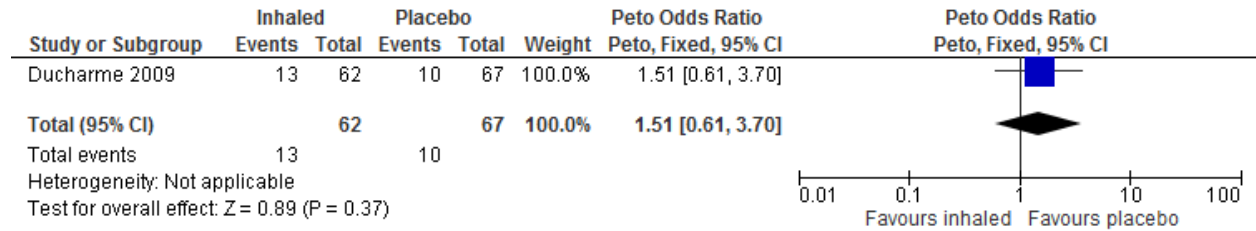

URT

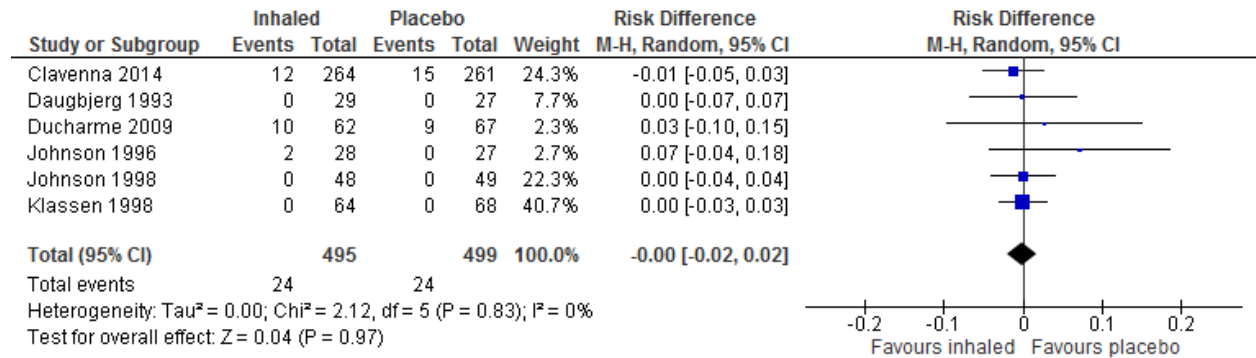

URT – Peto

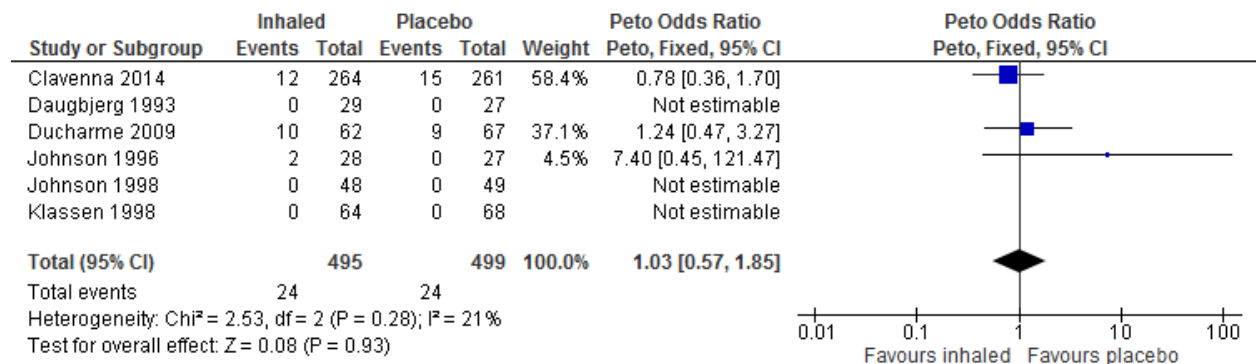

URT (by dose)

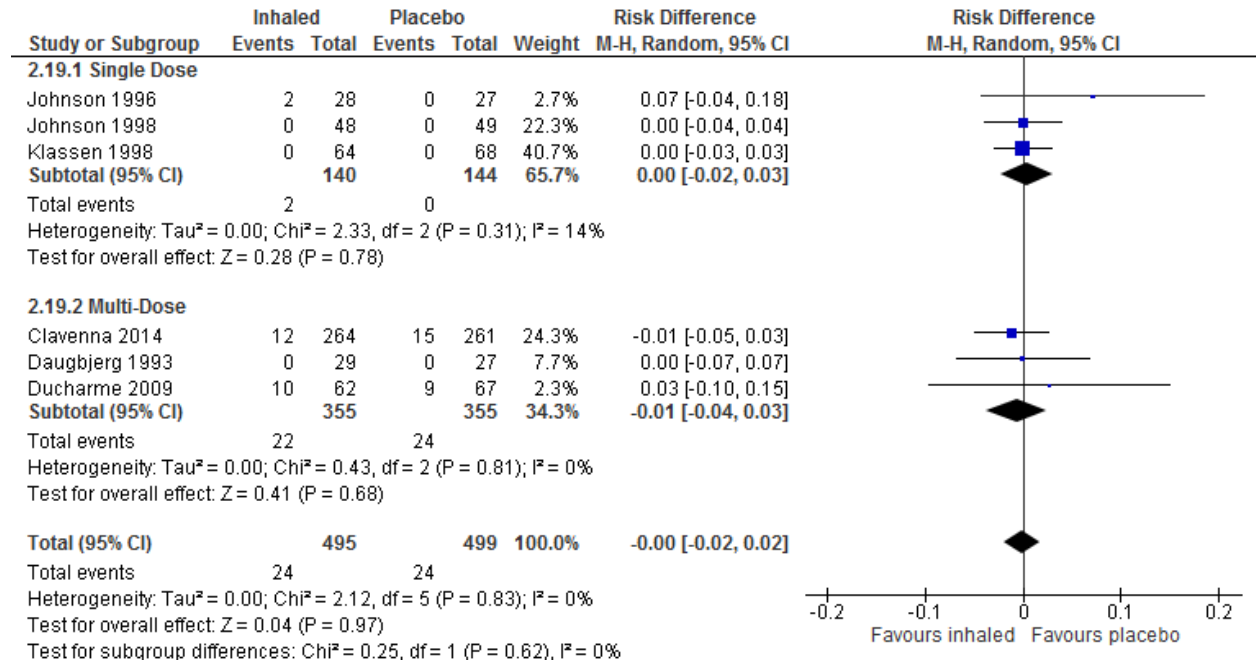

URT (by dose) – Peto

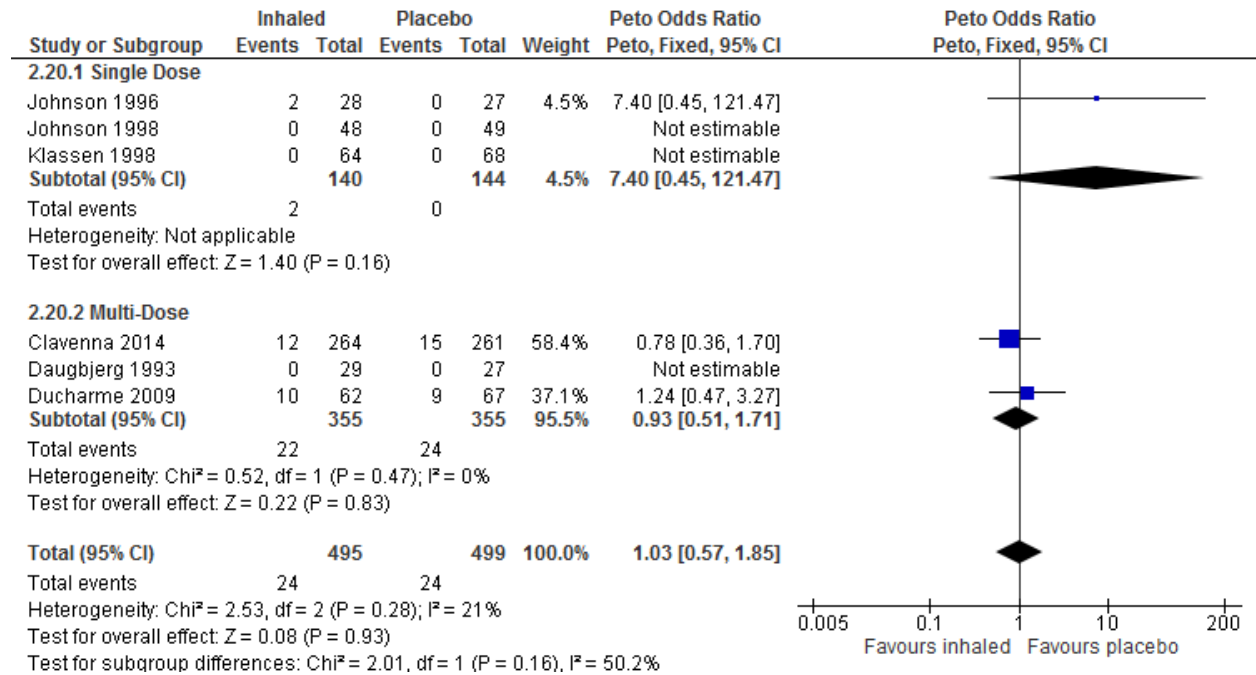

URT (by condition)

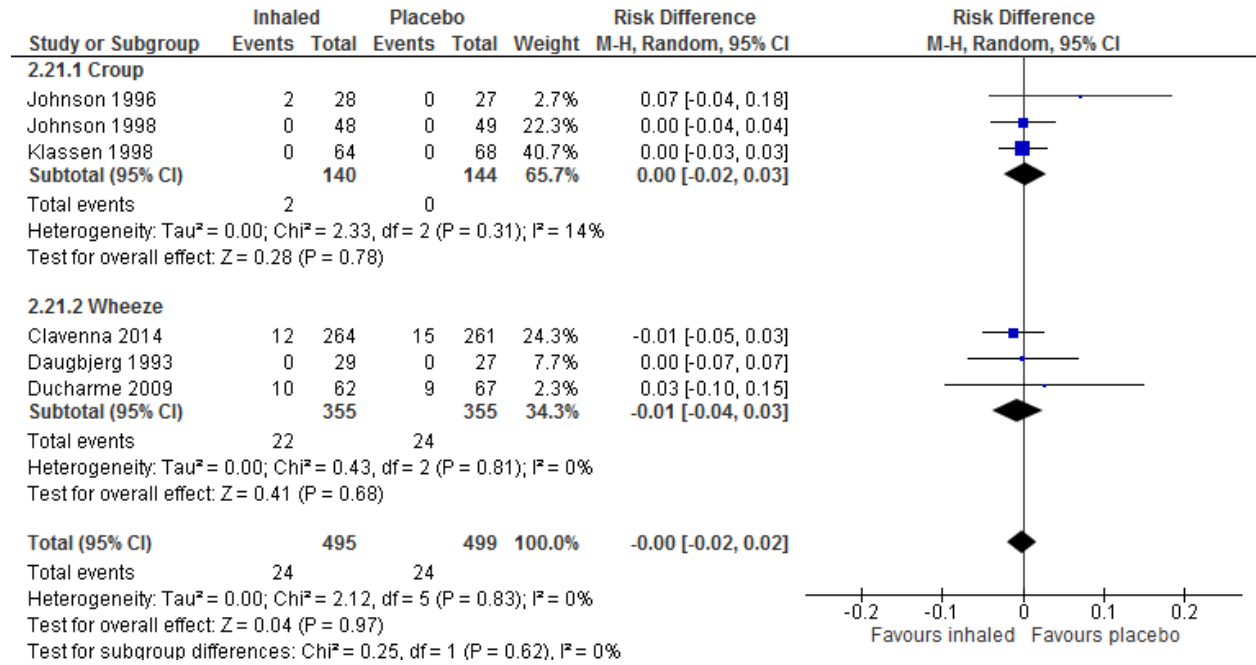

URT (by condition) – Peto

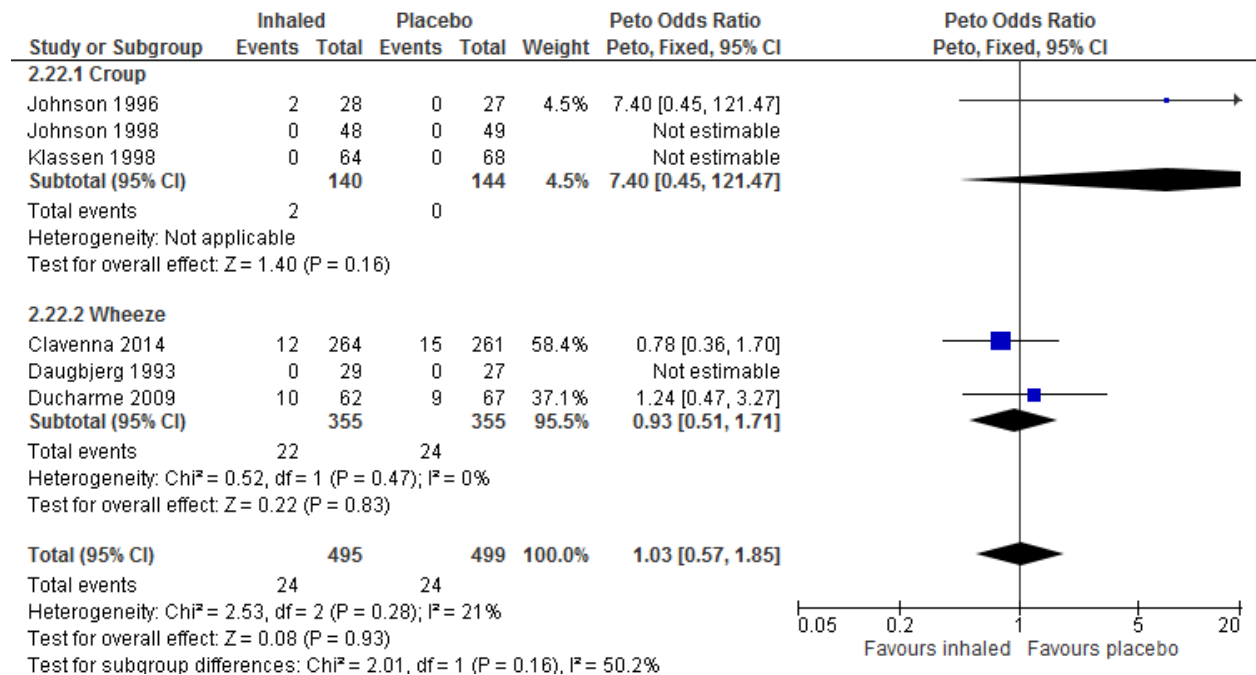

## Voice complaints

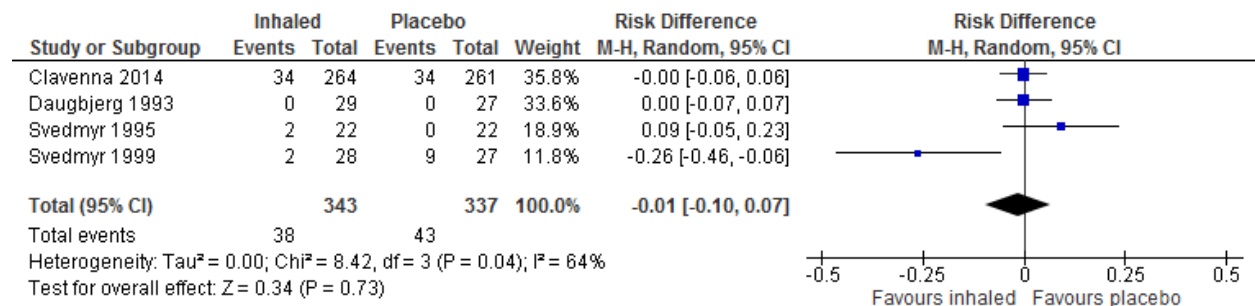

## Voice complaints – Peto

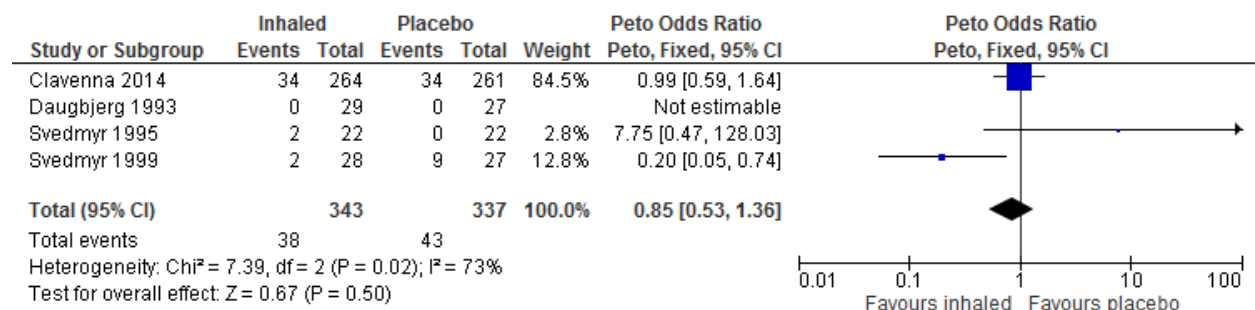

## Voice complaints (by condition)

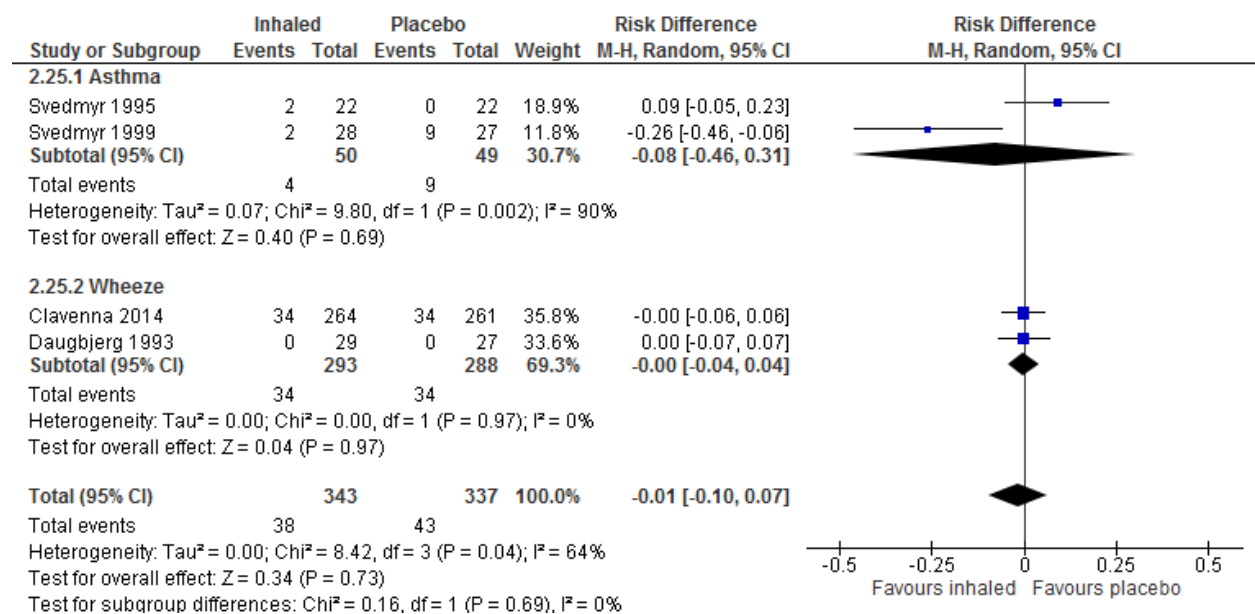

Voice complaints (by condition) - Peto

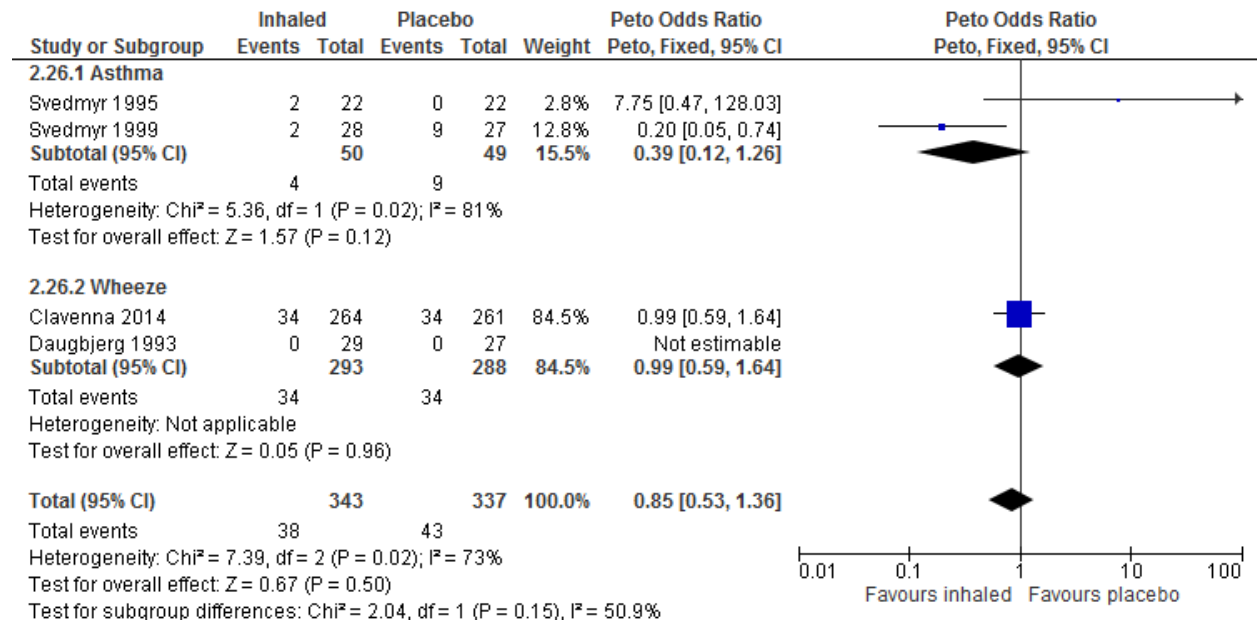

## INHALED vs. PLACEBO – GI

### GI bleeding

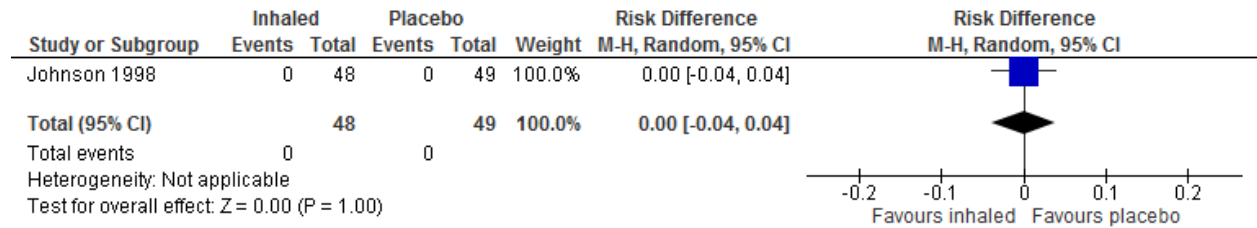

### GI bleeding – Peto

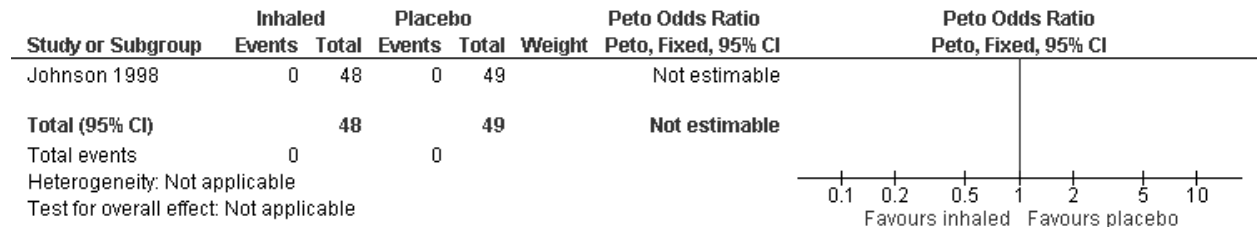

### Vomiting

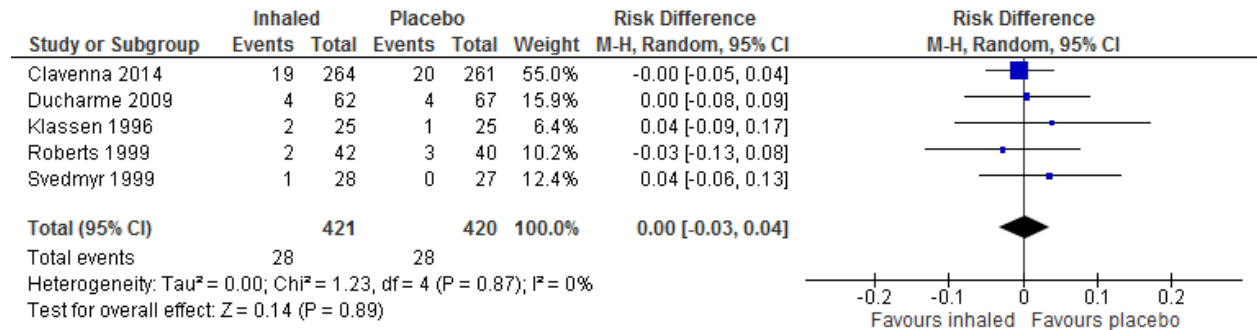

### Vomiting – Peto

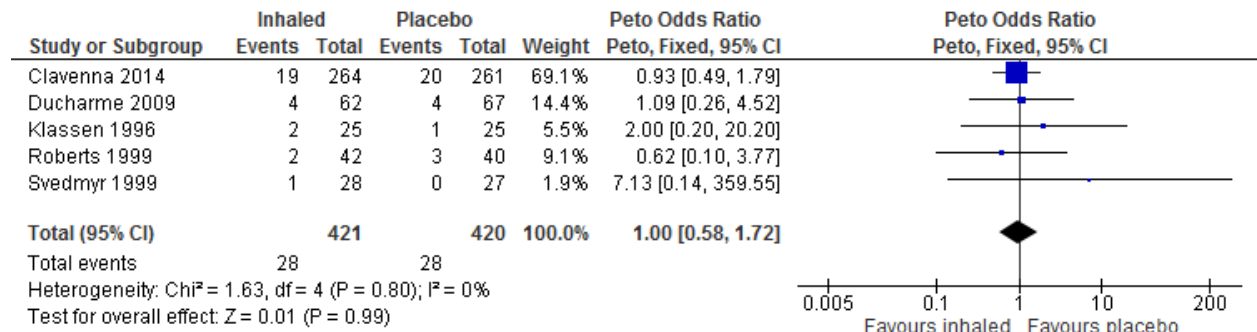



## Vomiting (by dose)

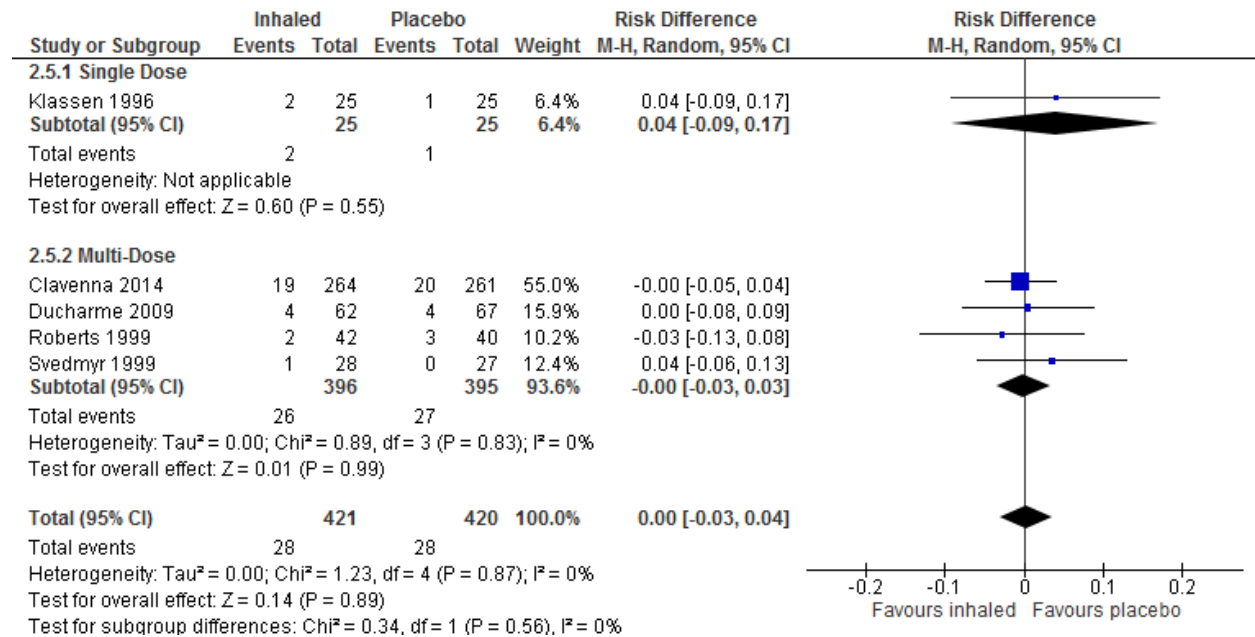

## Vomiting (by dose) – Peto

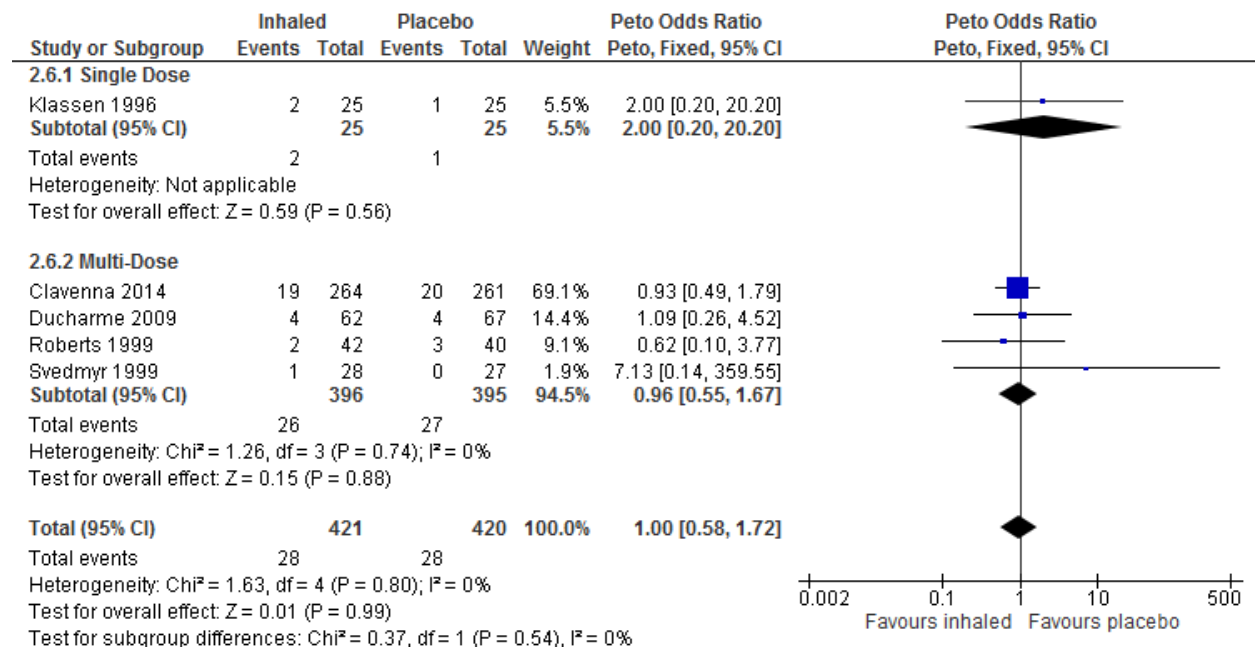

## Vomiting (by condition)

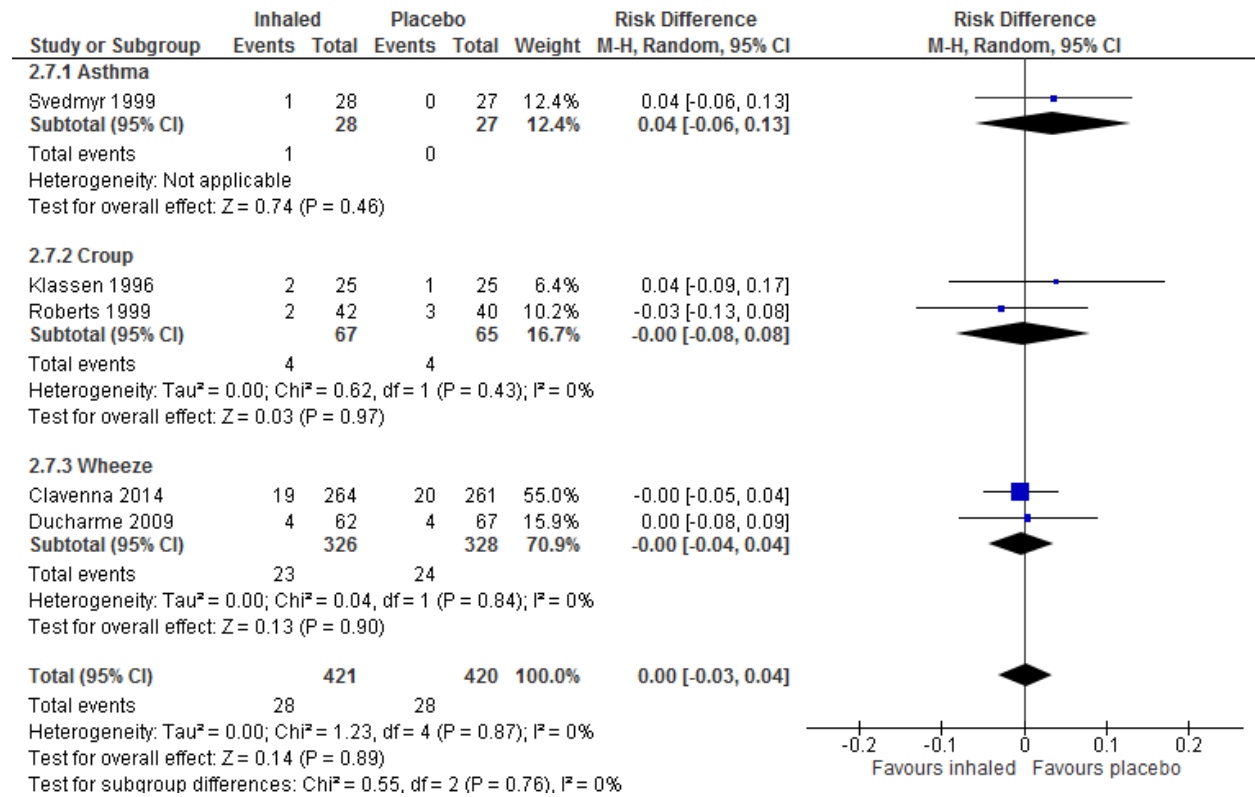

Vomiting (by condition) - Peto

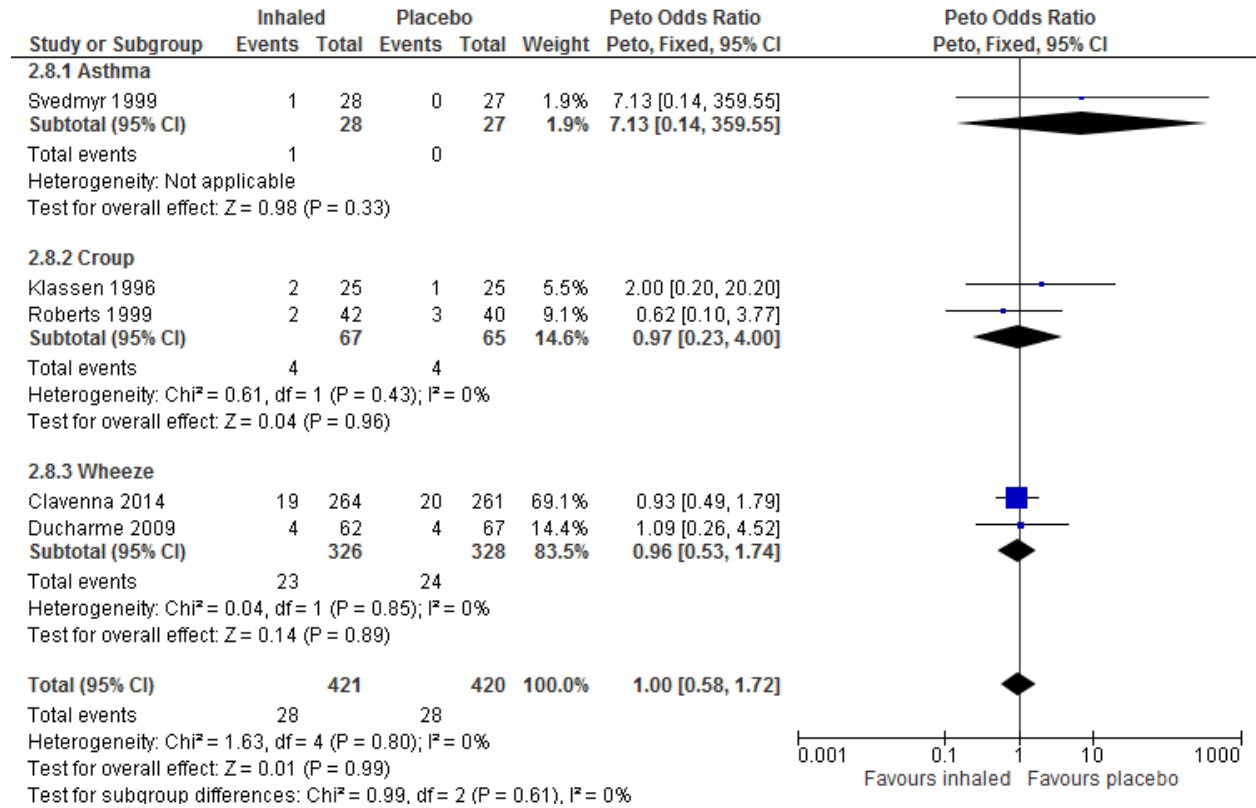

Diarrhea

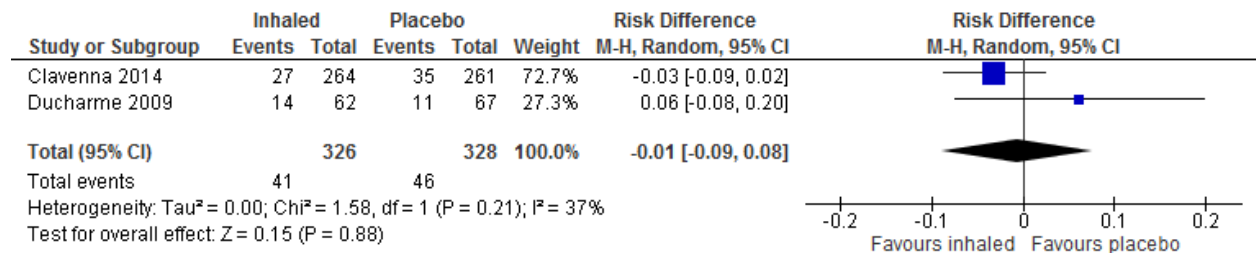

Diarrhea – Peto

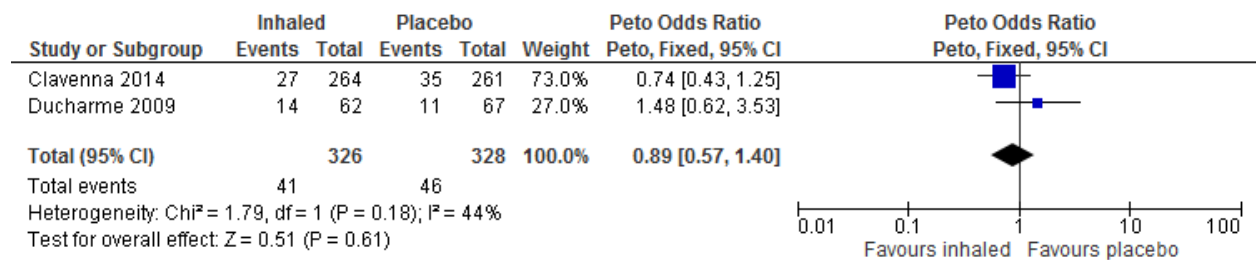

## INHALED vs. PLACEBO – CNS & Behaviour

### Behaviour change

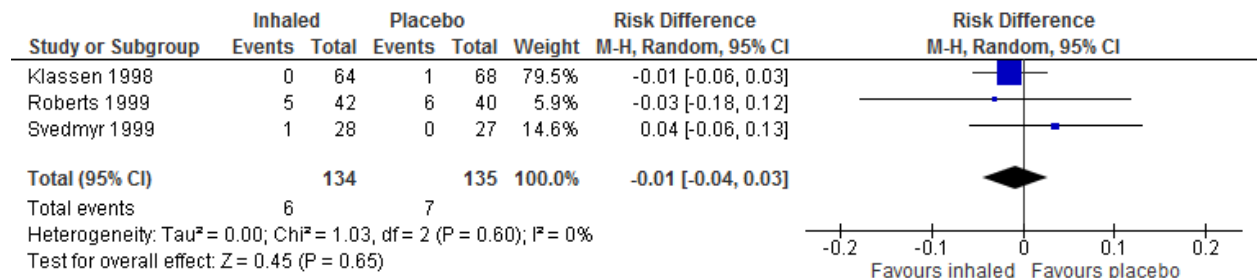

### Behaviour change – Peto

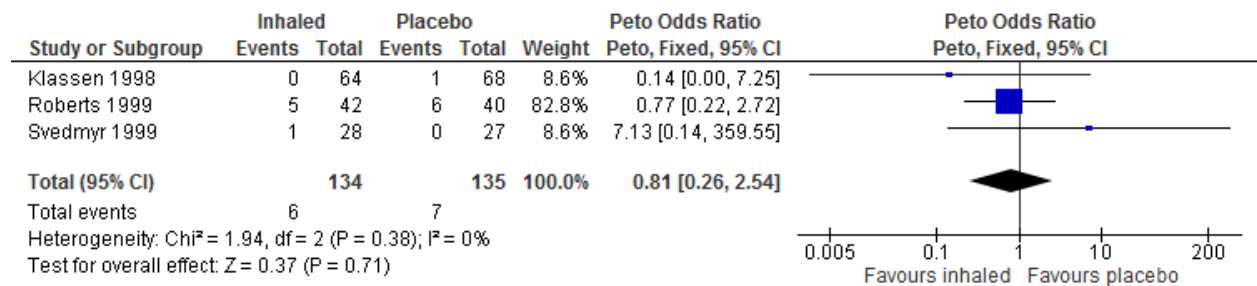

### Behaviour change (by dose)

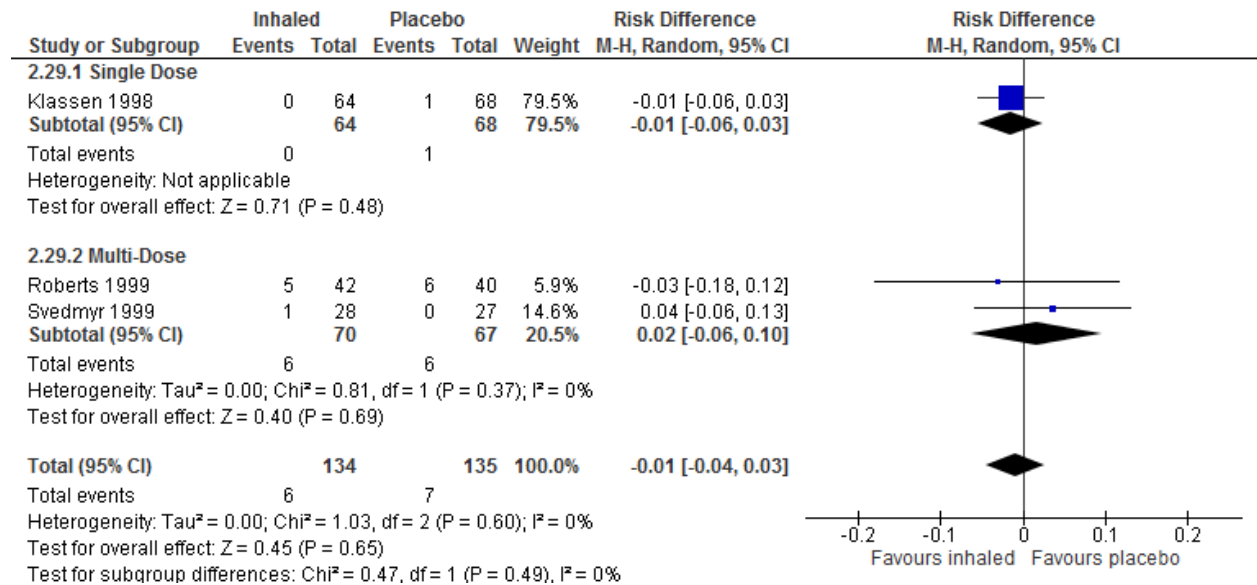

Behaviour change (by dose) – Peto

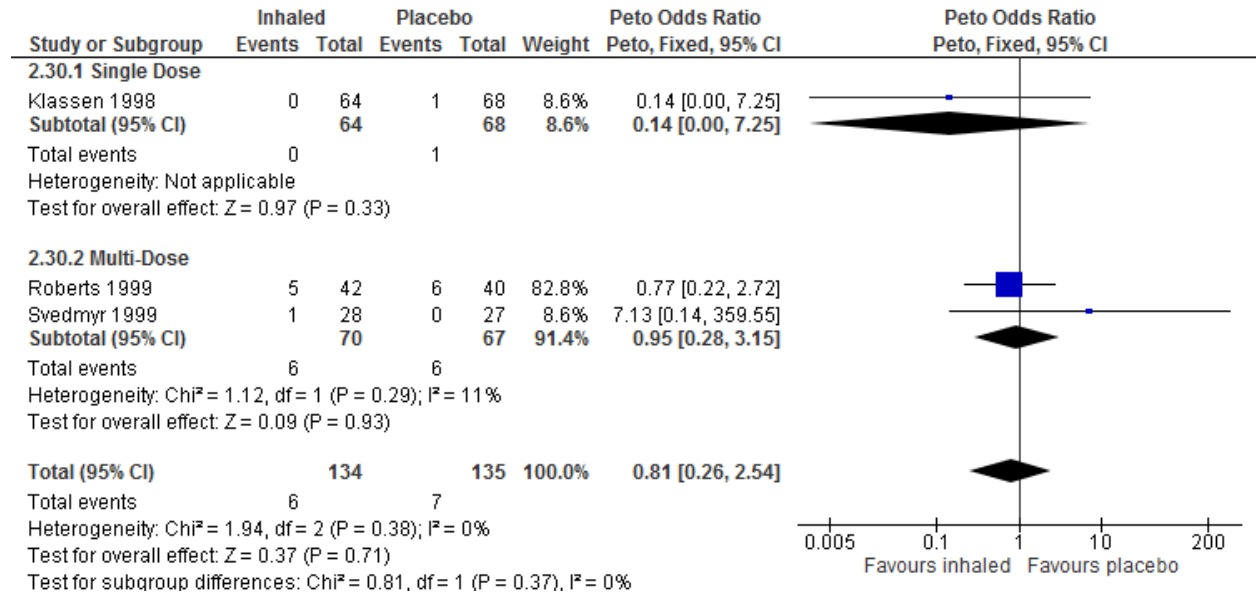

Behaviour change (by condition)

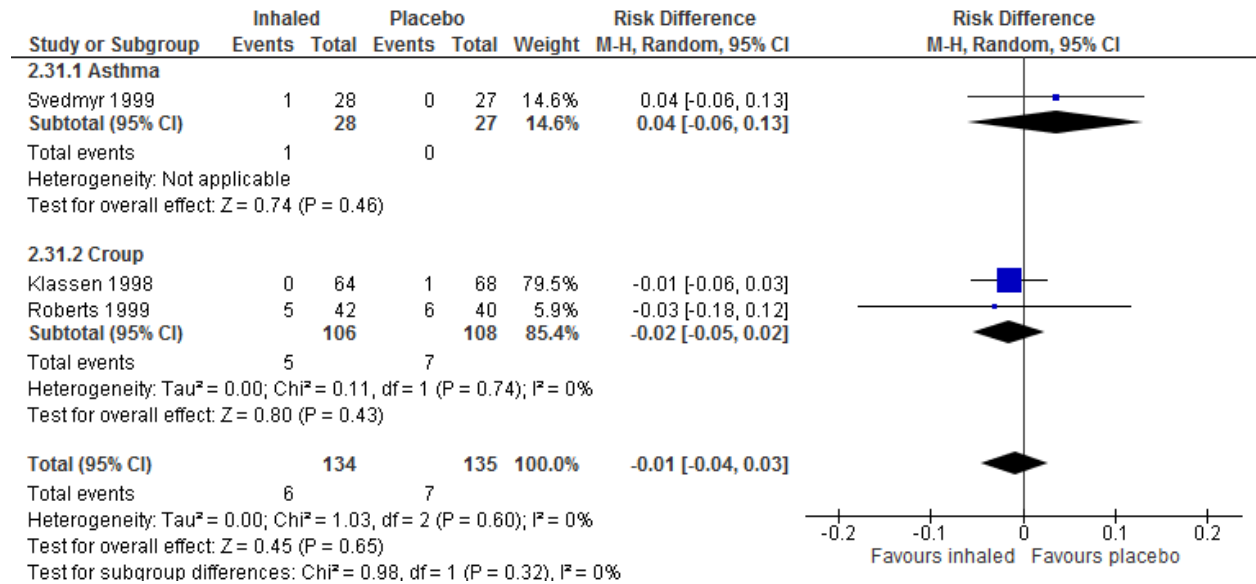

Behaviour change (by condition) – Peto

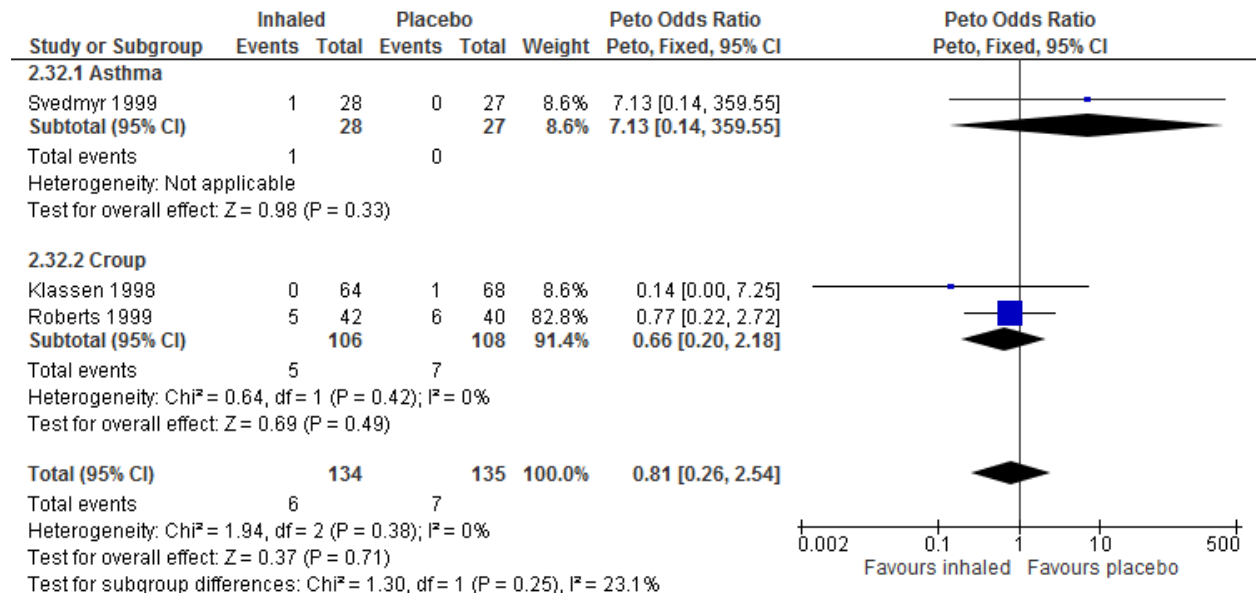

## INHALED vs. PLACEBO – Dermatologic

### Burn

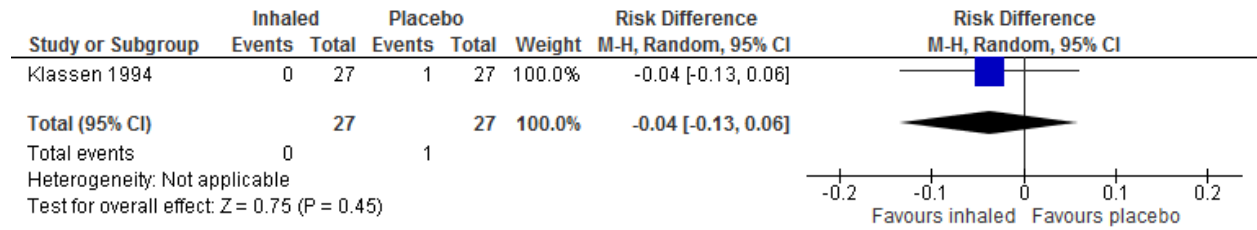

### Burn – Peto

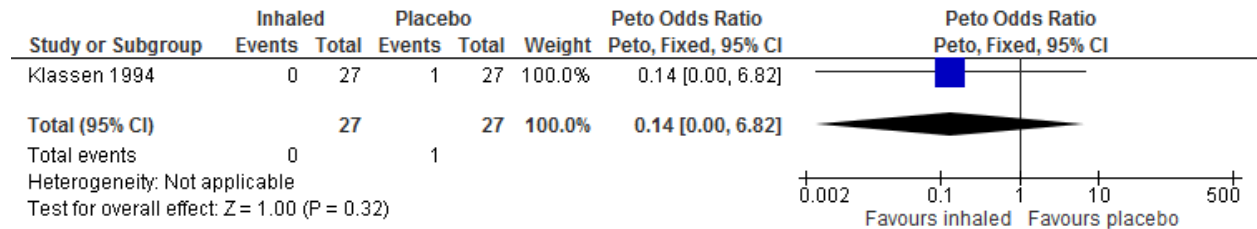

### Integument

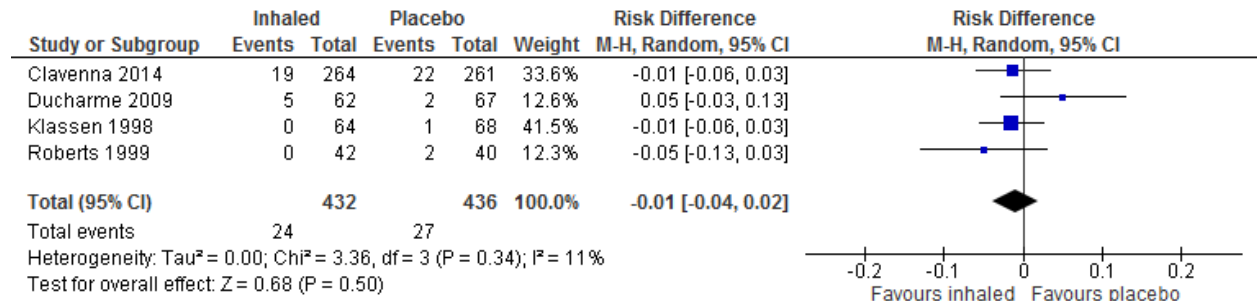

### Integument – Peto

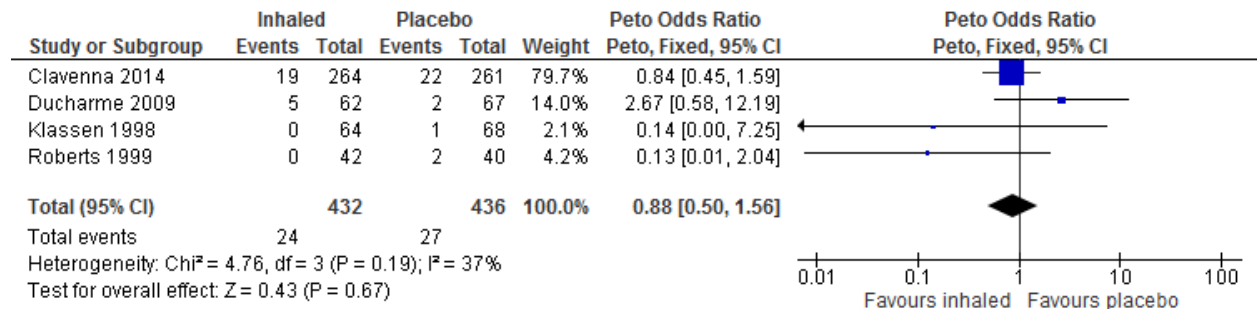

Integument (by dose)

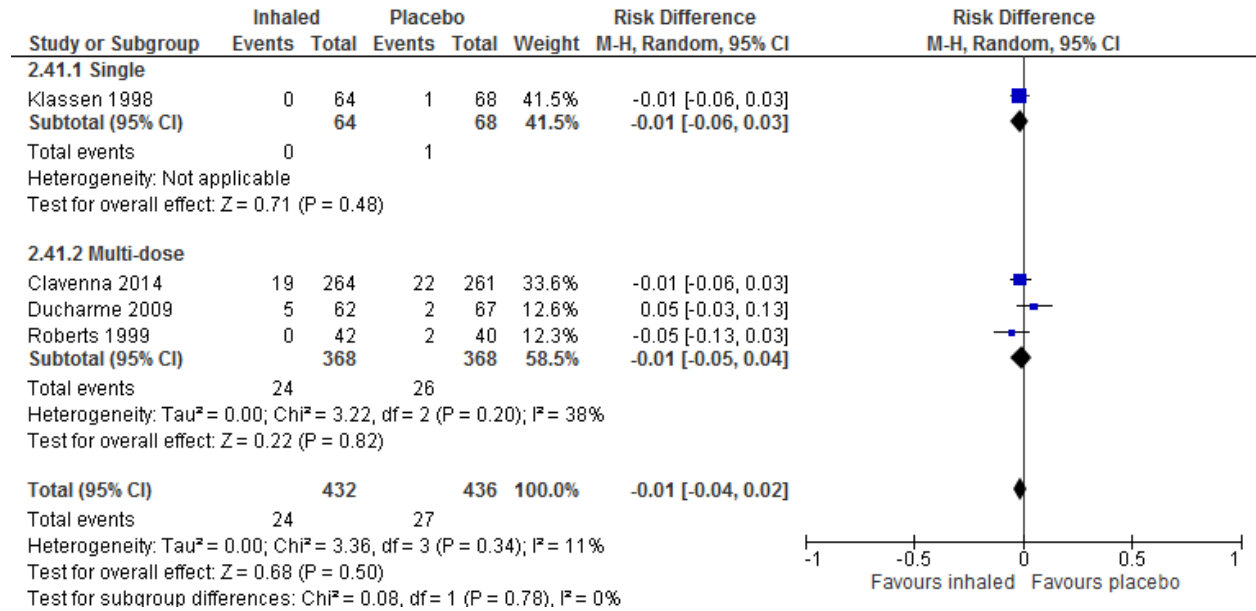

Integument (by dose) – Peto

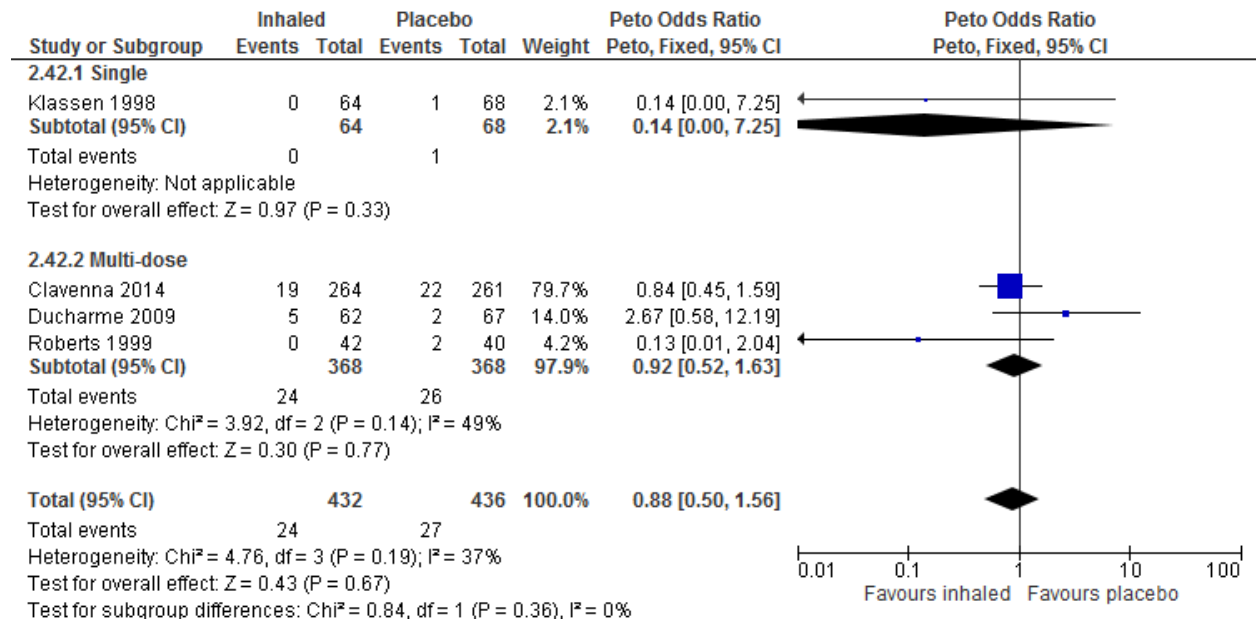



Integument (by condition)

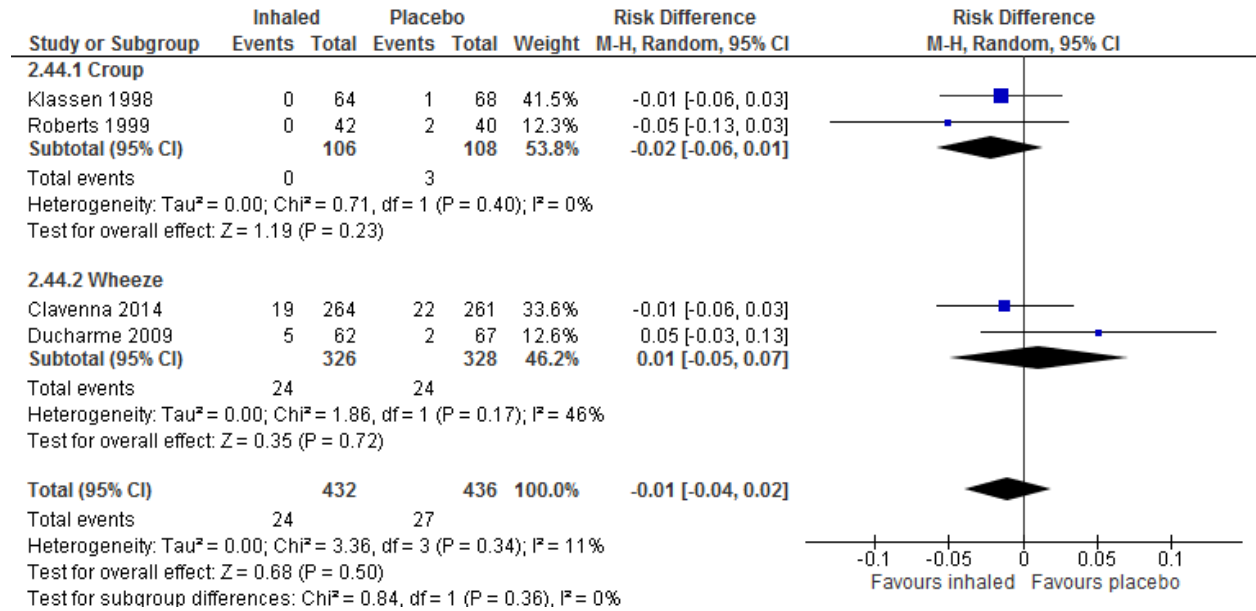

Integument (by condition) – Peto

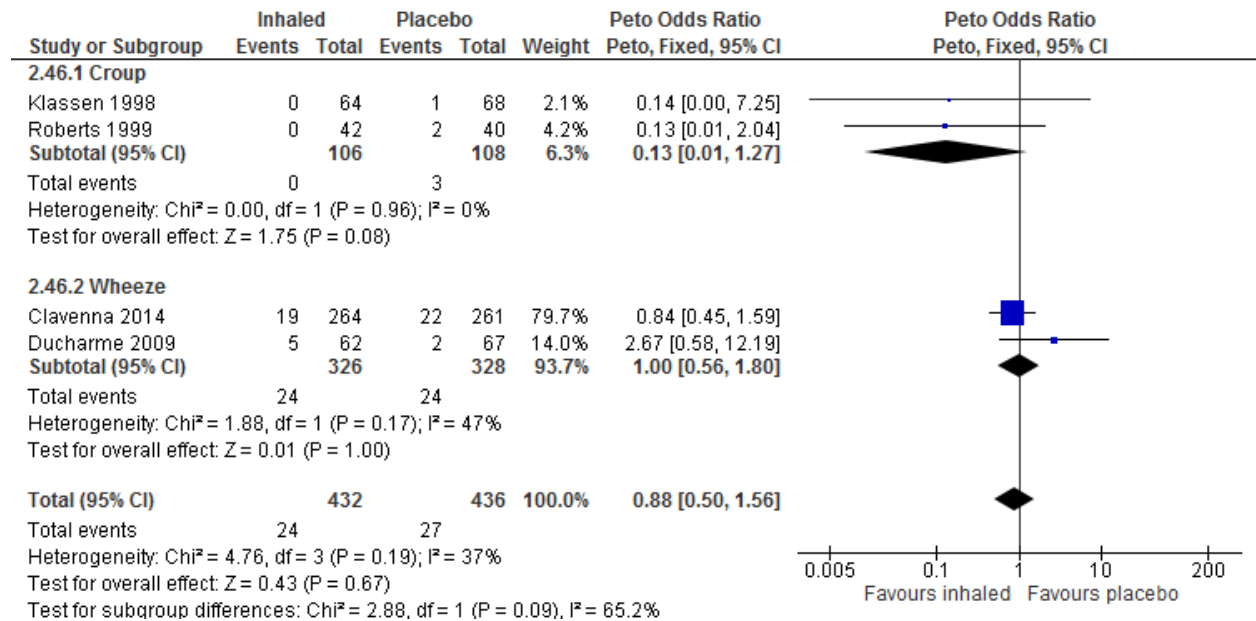

## INHALED vs. PLACEBO – Endocrine/Metabolic & Musculoskeletal

Growth – change from baseline, cm

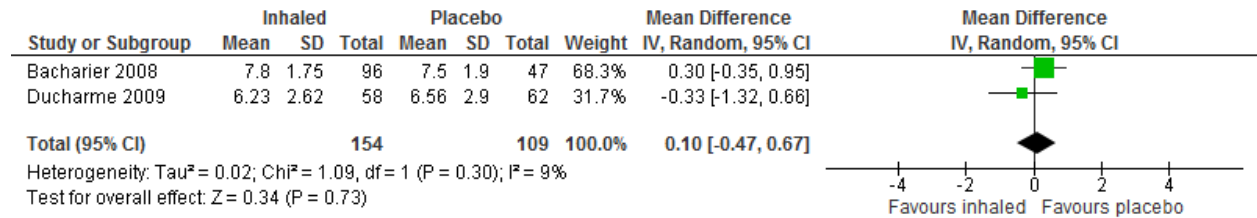

Adrenal suppression

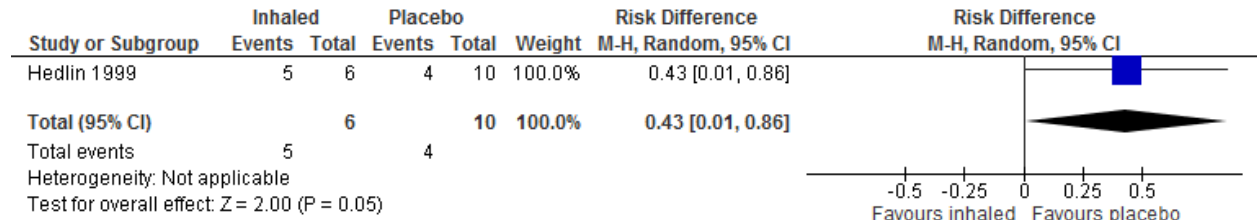

Adrenal suppression - Peto

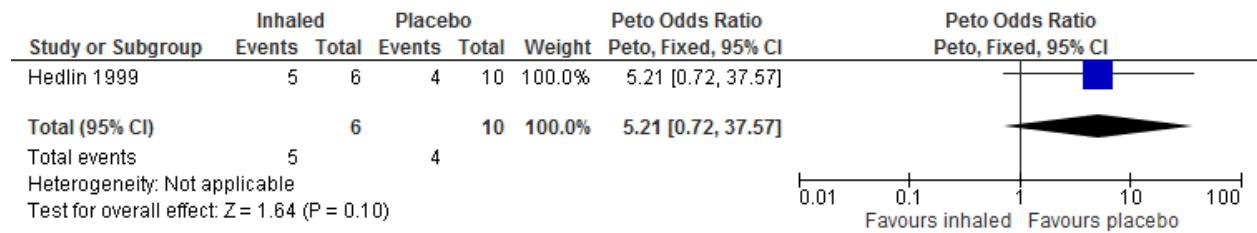

**INHALED vs. PLACEBO – Cardiovascular**

**Arrhythmia**

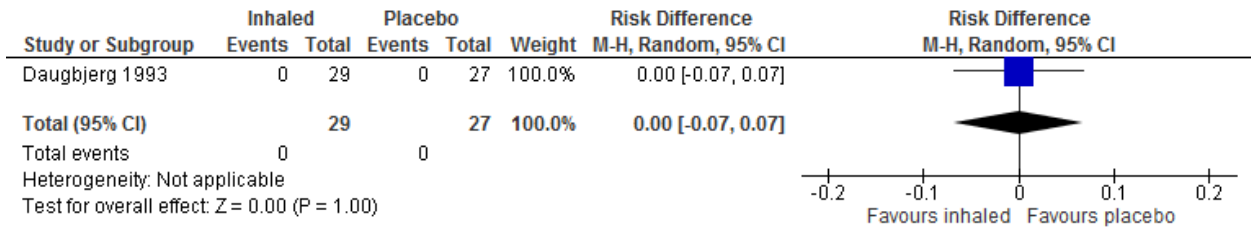

**Arrhythmia – Peto**

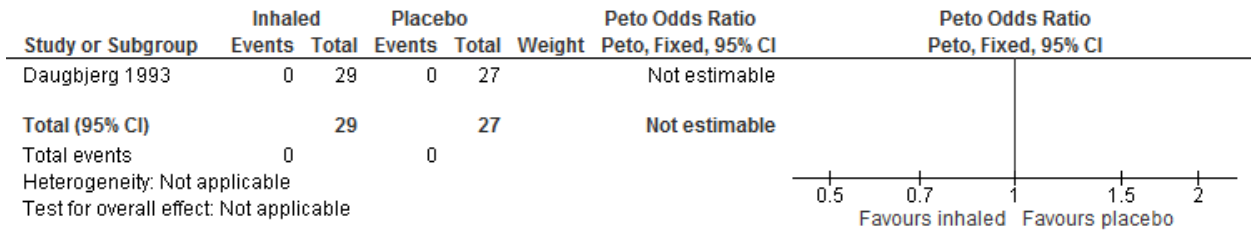

## DEXAMETHASONE vs. OTHER STEROID – GI

### Vomiting

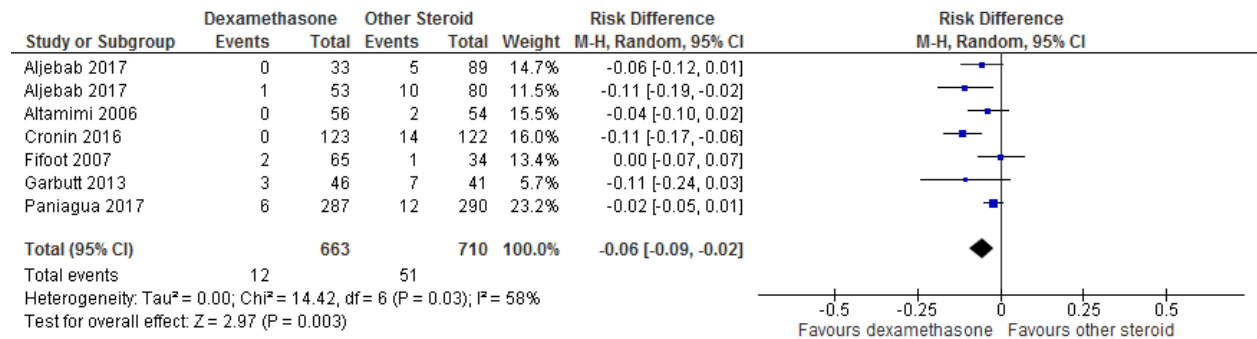

### Vomiting – Peto

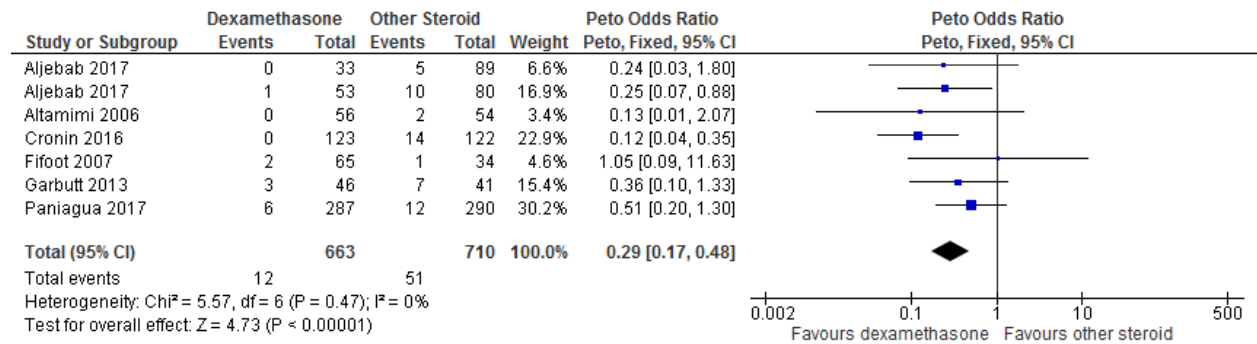

### Vomiting (by dose)

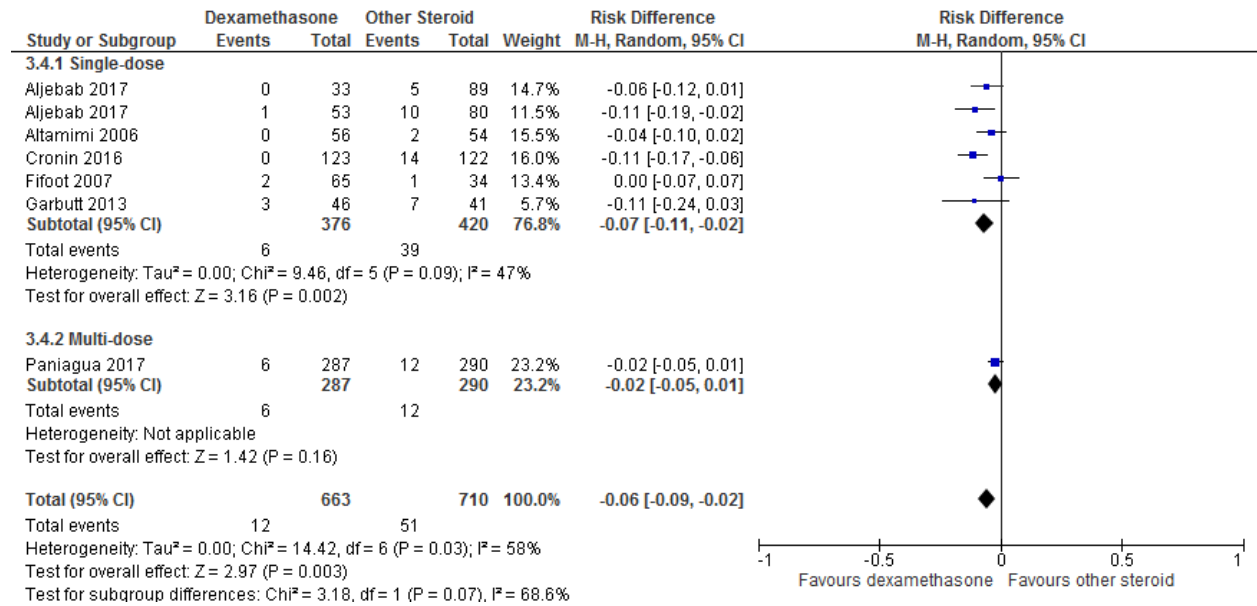

### Vomiting (by dose) – Peto

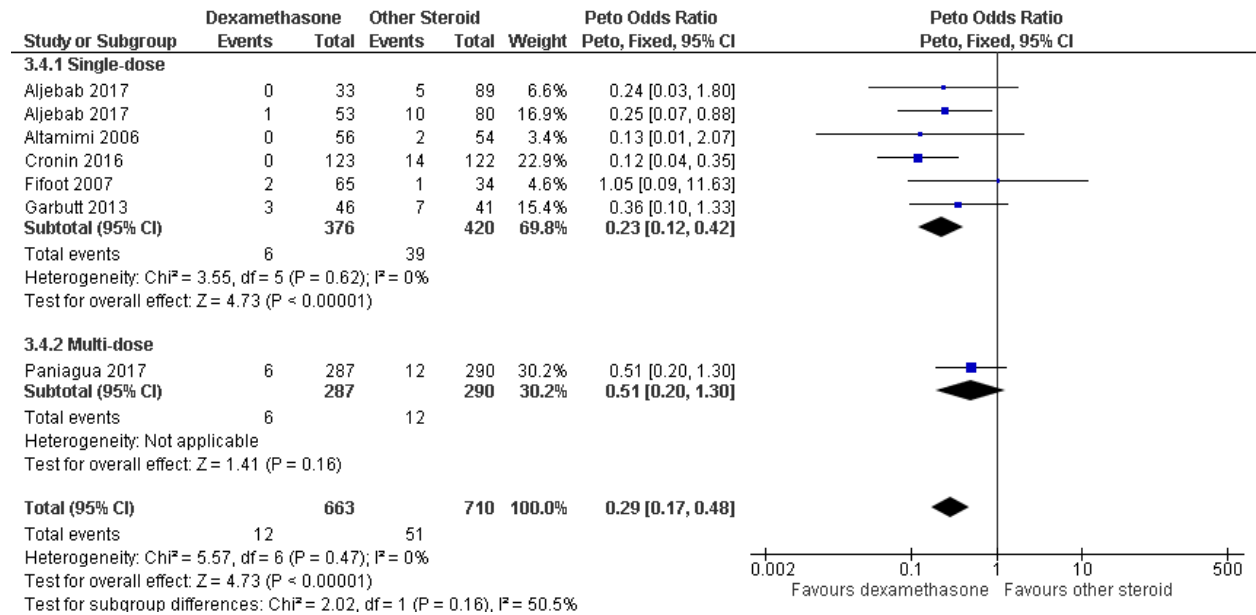

### Vomiting (by condition)

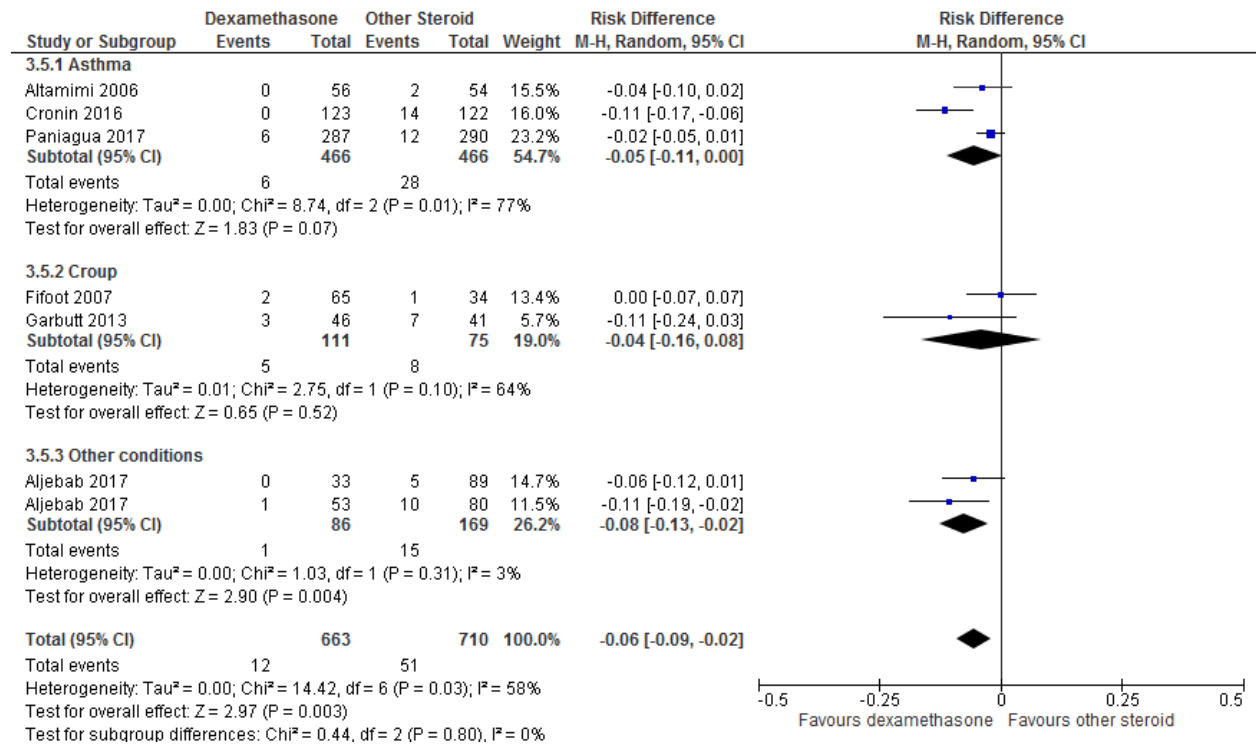

### Vomiting (by condition) – Peto

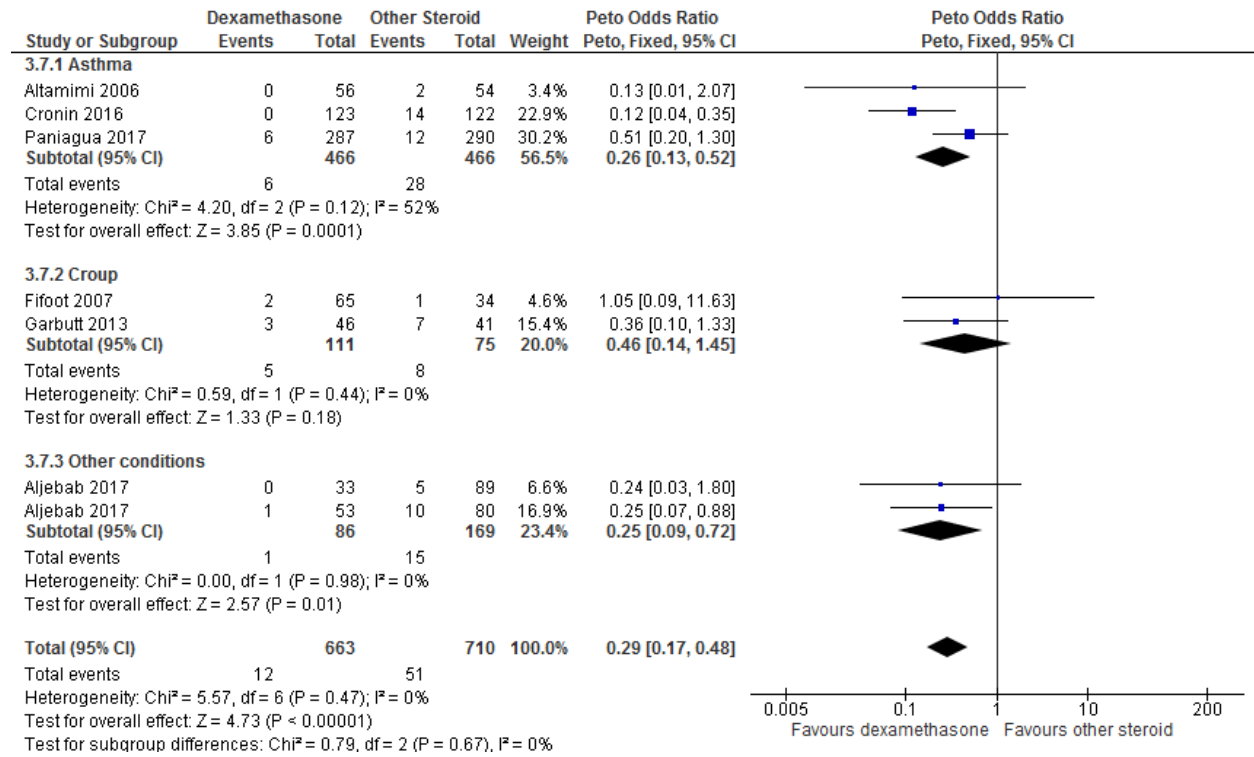

### Abdominal pain

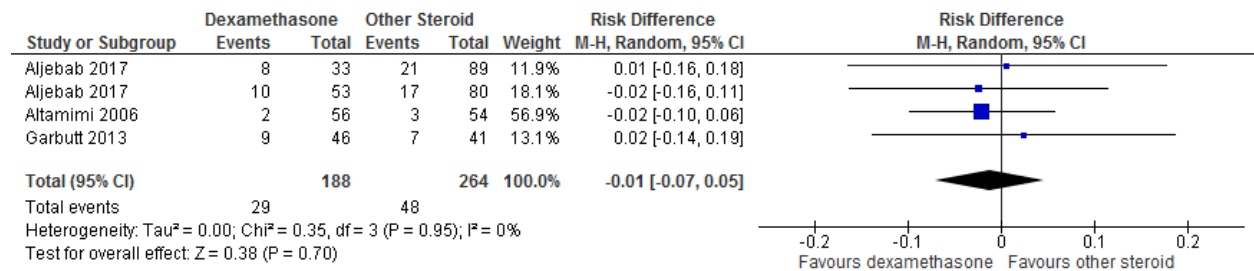

### Abdominal pain – Peto

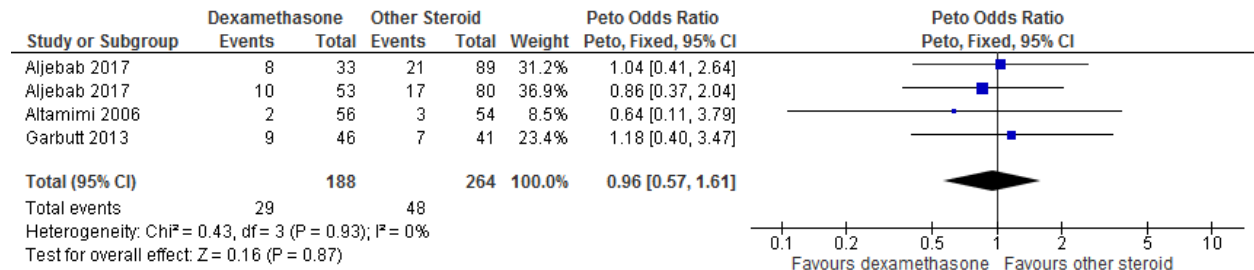

### Abdominal pain (by condition)

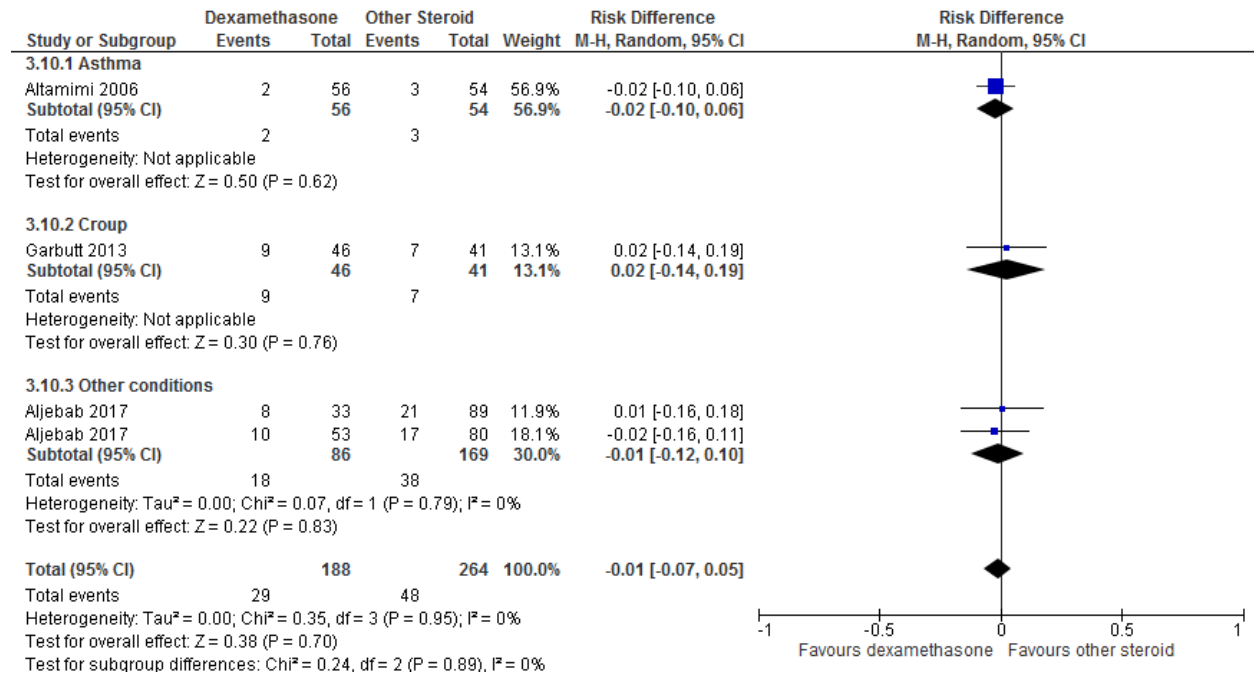

### Abdominal pain (by condition) – Peto

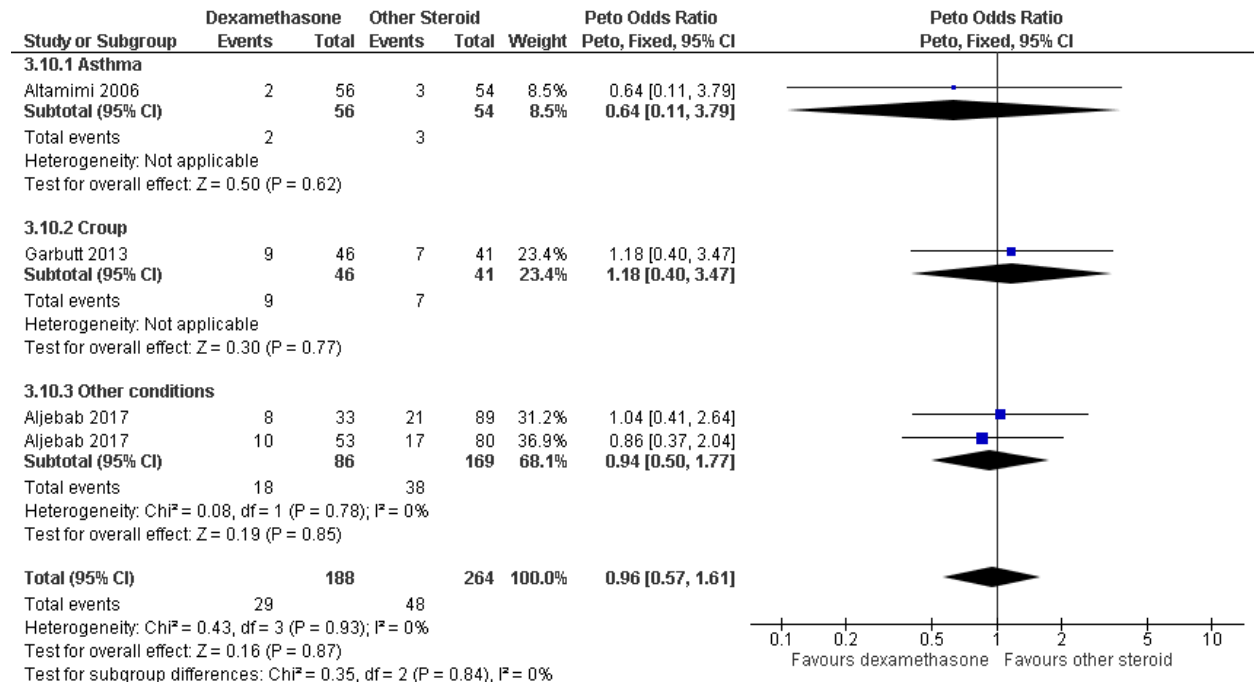

## DEXAMETHASONE vs. OTHER STEROID – CNS & Behaviour

### Tremor/jitteriness

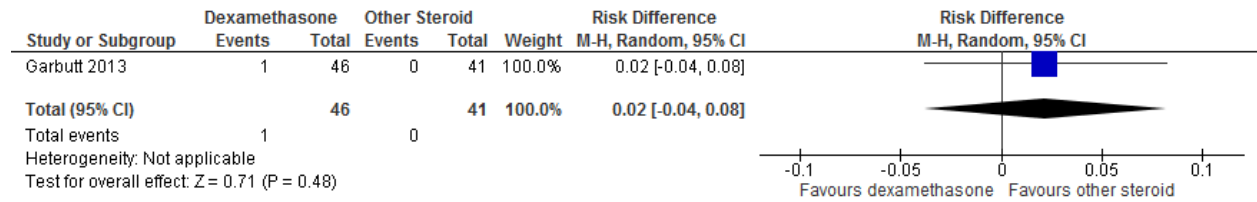

### Tremor/jitteriness – Peto

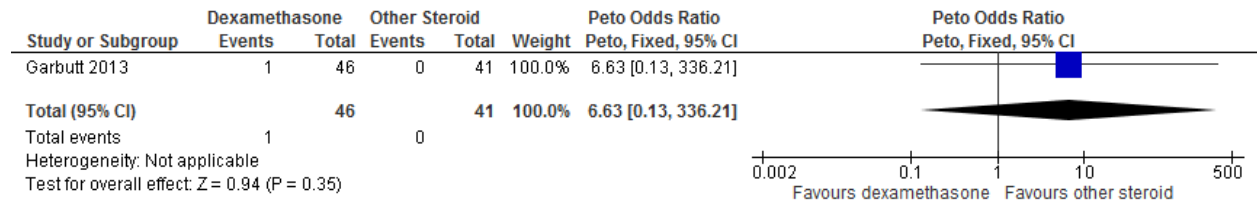

### Behaviour change

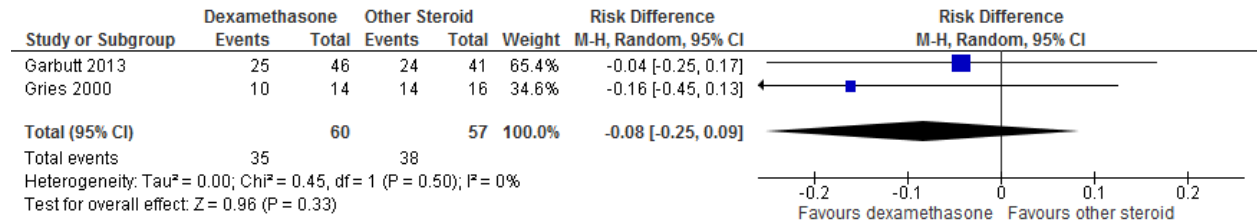

### Behaviour change – Peto

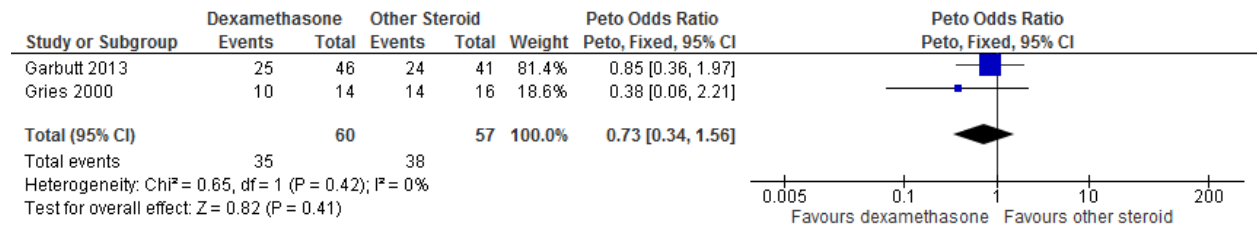



### Behaviour change (by condition)

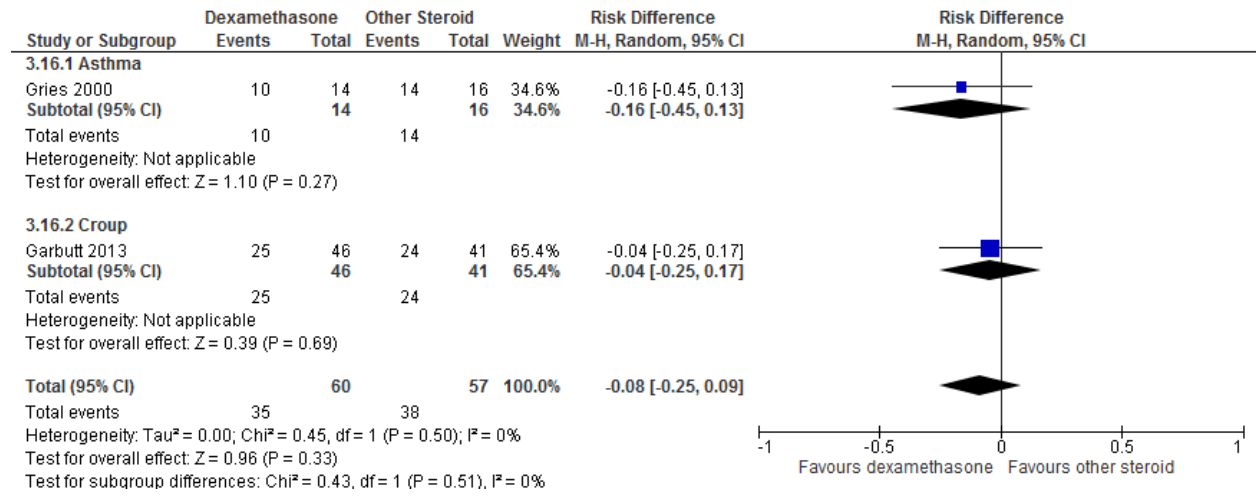

### Behaviour change (by condition) – Peto

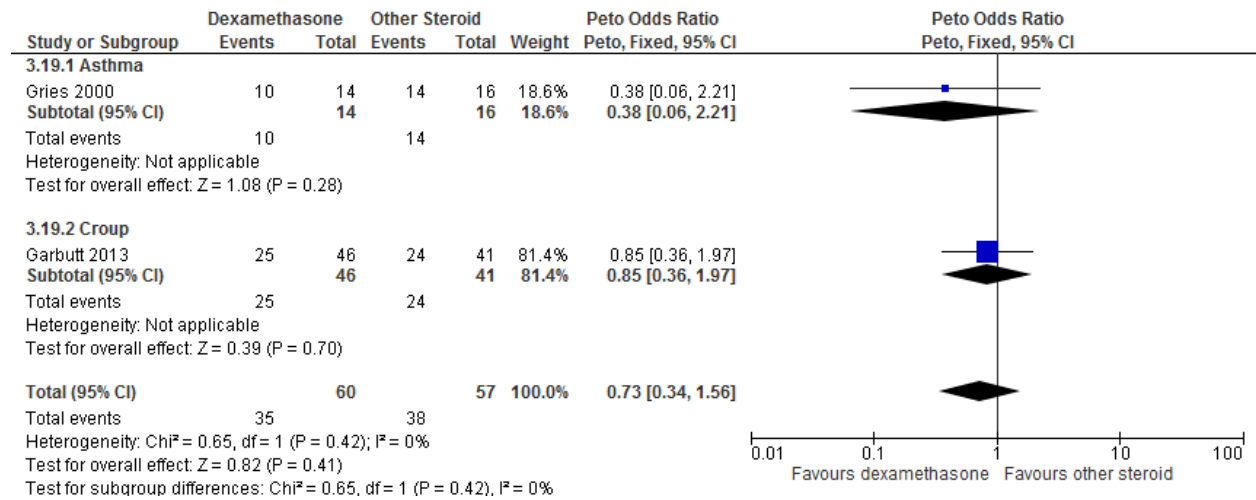

### Headache

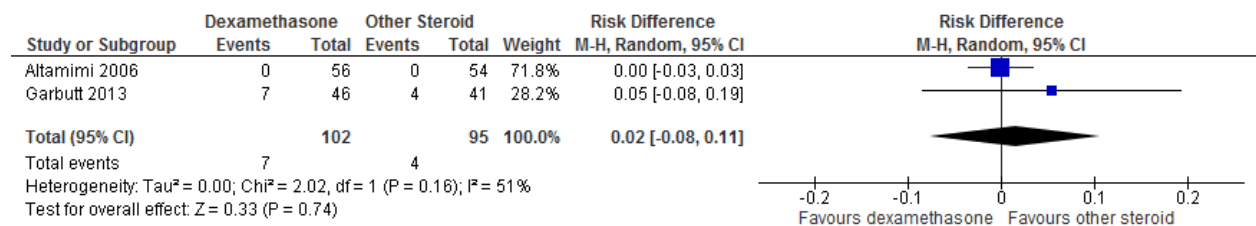

## Headache – Peto

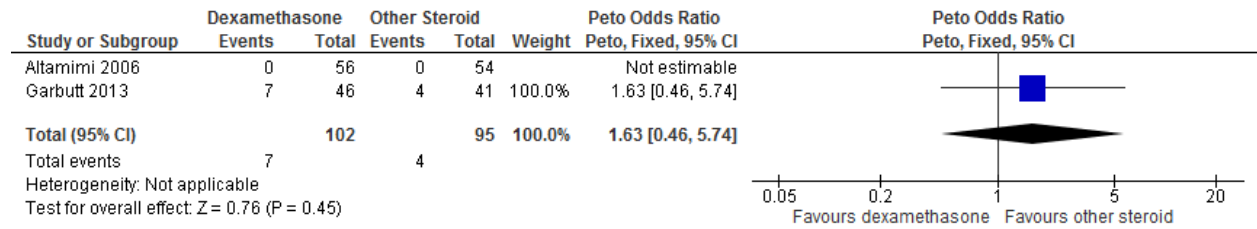

## Headache (by condition)

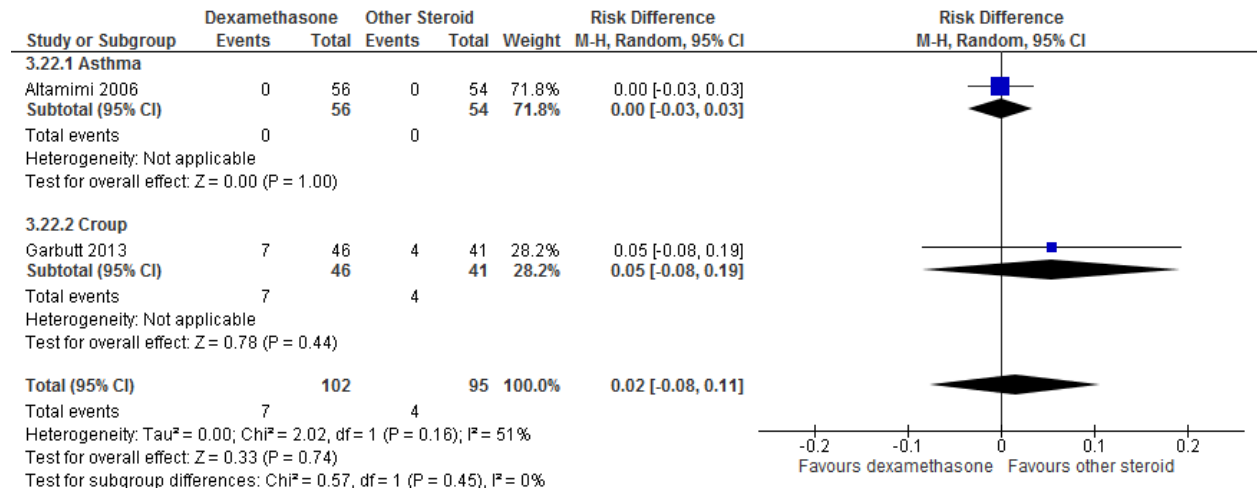

## Headache (by condition) – Peto

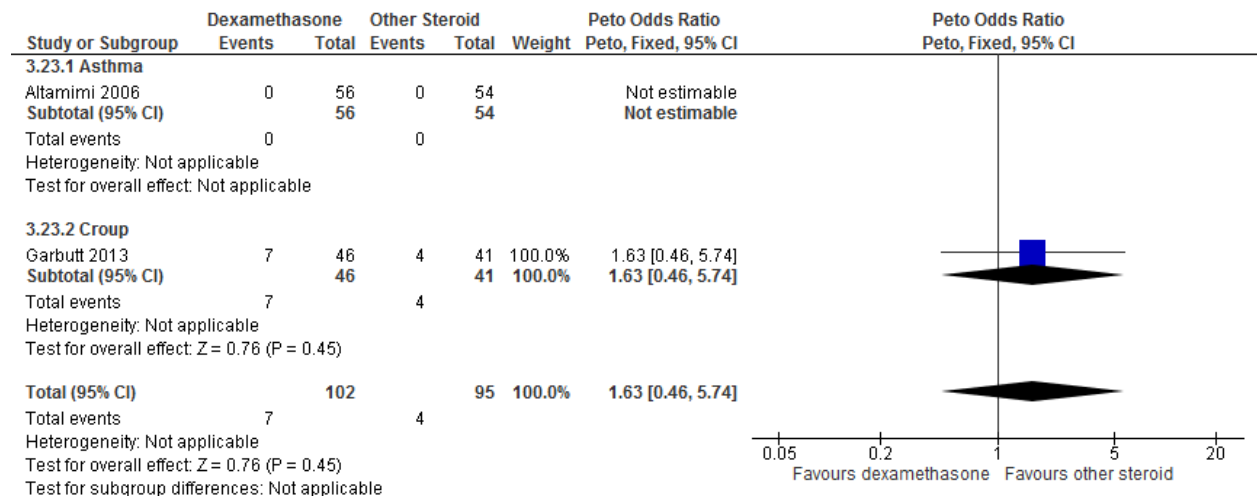

## DEXAMETHASONE vs. OTHER STEROID – Dermatologic

### Phlebitis

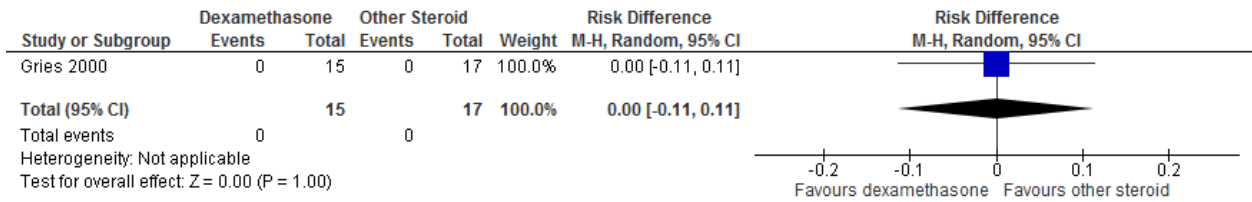

### Phlebitis – Peto

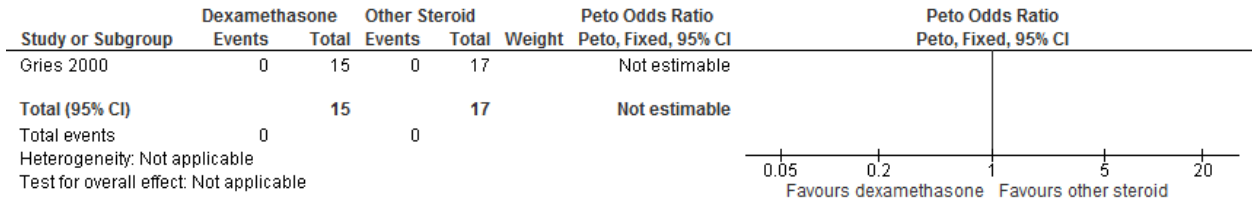

## DEXAMETHASONE vs. OTHER STEROID – Endocrine/Metabolic & Musculoskeletal

### Fluid & electrolyte abnormalities

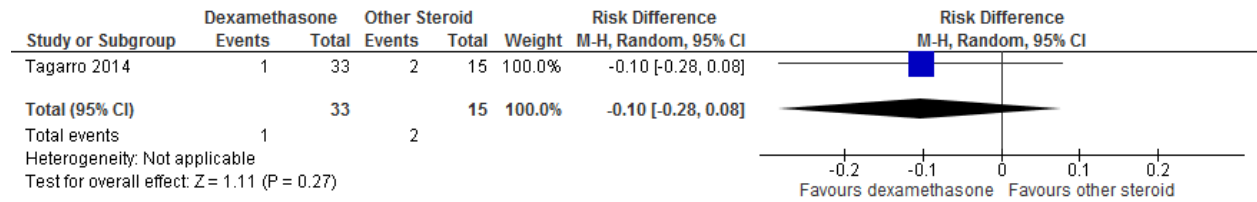

### Fluid & electrolyte abnormalities – Peto

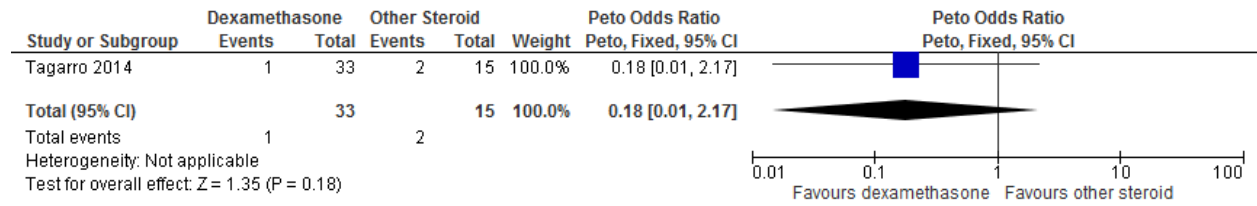

## DEXAMETHASONE vs. OTHER STEROID – Cardiovascular

### Arrhythmia

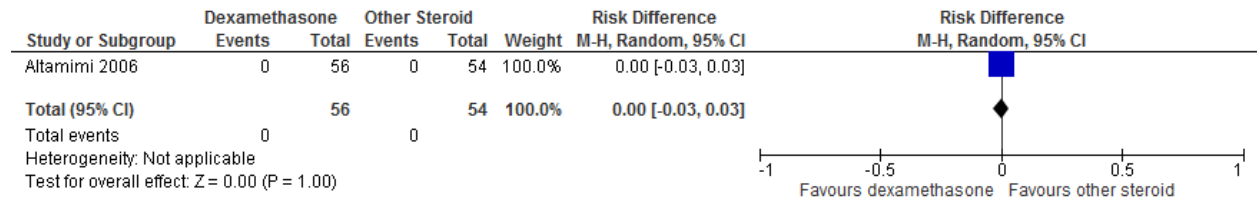

### Arrhythmia – Peto

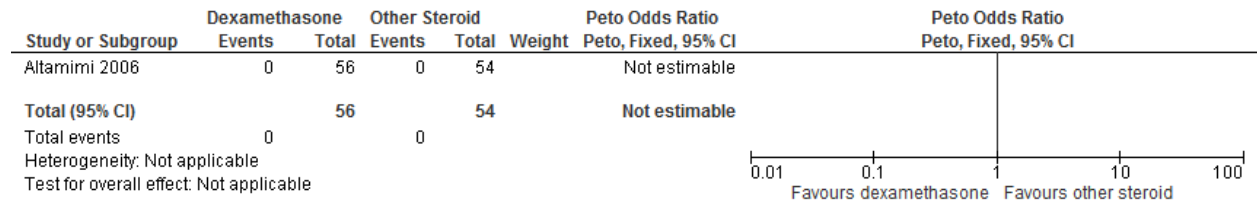

### Hypertension

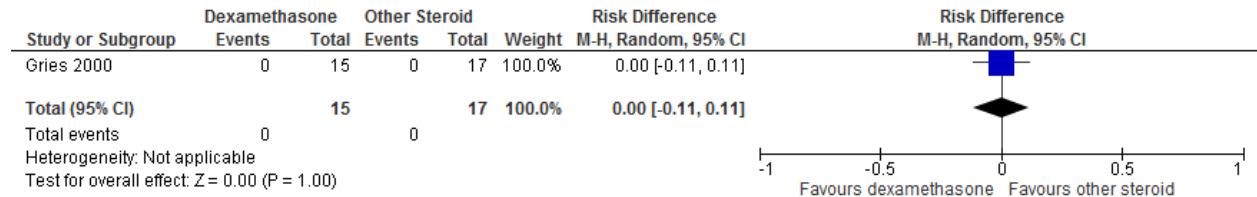

### Hypertension – Peto

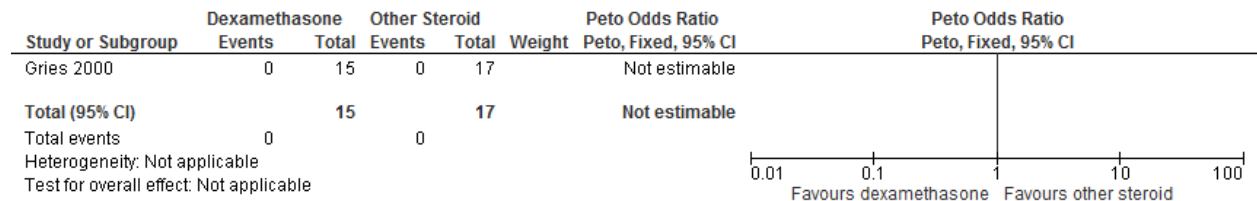

## DEXAMETHASONE vs. OTHER STEROID – General

### General complaints

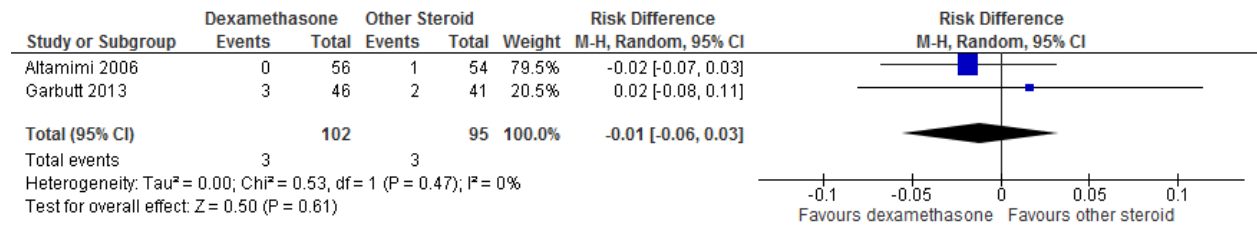

### General complaints – Peto

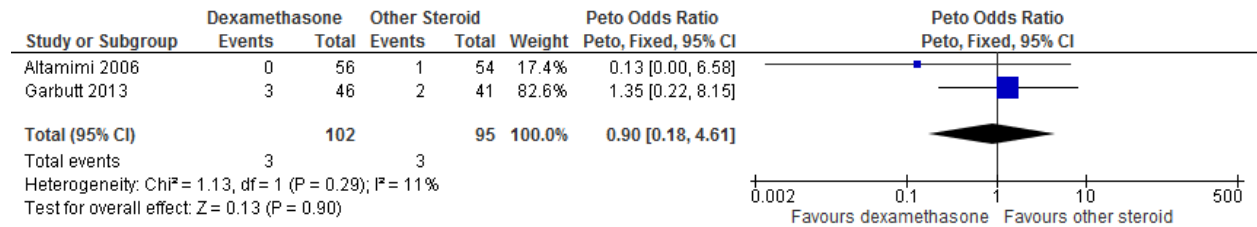

### General complaints (by condition)

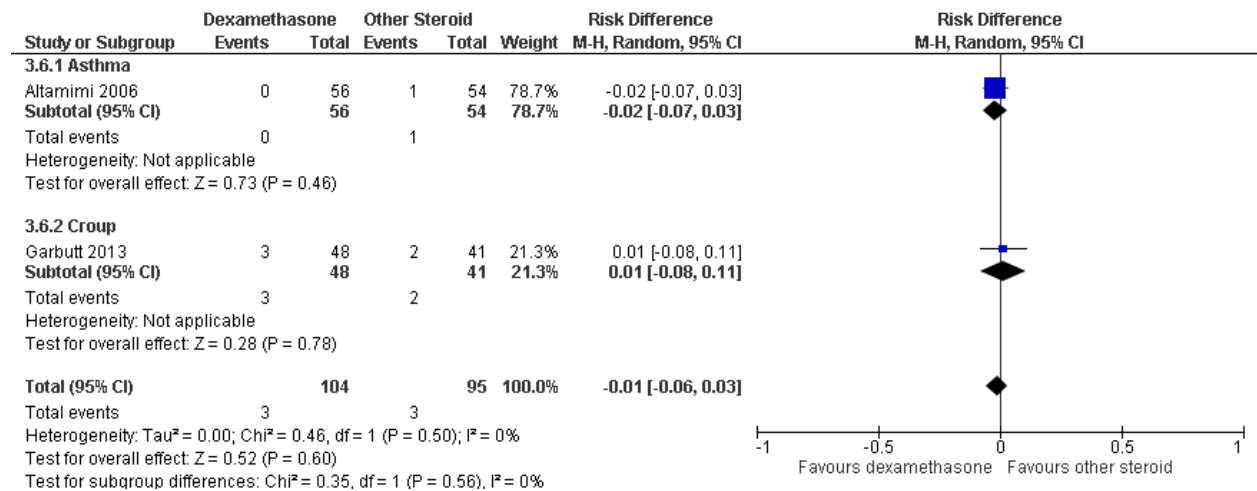

General complaints (by condition) – Peto

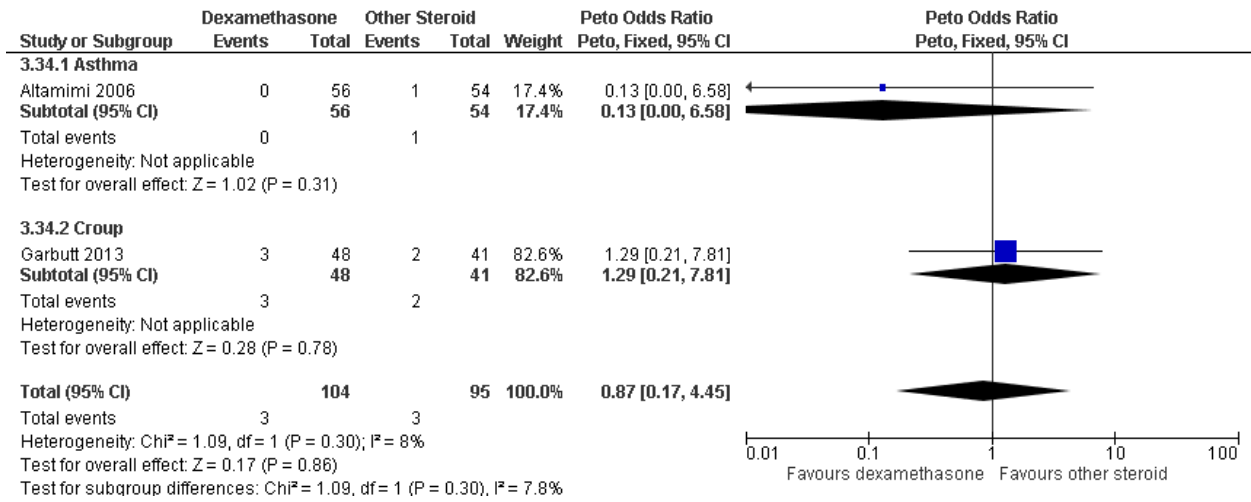

Supplement: bmjopen-2018-028511supp006.pdf [file bmjopen-2018-028511supp006.pdf]
