# Supplementary material for: Safety of corticosteroids in young children with acute respiratory conditions: a systematic review and meta-analysis
Source: PubMed Central journal article supplement — BMJ Open. 2019 Aug 1;9(8):e028511. doi: 10.1136/bmjopen-2018-028511 (PMC6688746; doi:10.1136/bmjopen-2018-028511), 2019-08-01
Supplement: bmjopen-2018-028511.draft_revisions.pdf [file bmjopen-2018-028511.draft_revisions.pdf]

# BMJ Open

BMJ Open is committed to open peer review. As part of this commitment we make the peer review history of every article we publish publicly available.

When an article is published we post the peer reviewers' comments and the authors' responses online. We also post the versions of the paper that were used during peer review. These are the versions that the peer review comments apply to.

The versions of the paper that follow are the versions that were submitted during the peer review process. They are not the versions of record or the final published versions. They should not be cited or distributed as the published version of this manuscript.

BMJ Open is an open access journal and the full, final, typeset and author-corrected version of record of the manuscript is available on our site with no access controls, subscription charges or pay-per-view fees (<http://bmjopen.bmj.com>).

If you have any questions on BMJ Open's open peer review process please email [info.bmjopen@bmj.com](mailto:info.bmjopen@bmj.com)

# BMJ Open

## Safety of Corticosteroids in Young Children with Acute Respiratory Conditions: A Systematic Review and Meta-Analysis

|                               |                                                                                                                                                                                                                                                                                                                                                                                                                                                                                                                                                                                                                                                                                                                                                                                                                                                                                                                                                                                                                                                                                                                                                                                                                                                                                                                                                                                                                                                                                                                                                          |
|-------------------------------|----------------------------------------------------------------------------------------------------------------------------------------------------------------------------------------------------------------------------------------------------------------------------------------------------------------------------------------------------------------------------------------------------------------------------------------------------------------------------------------------------------------------------------------------------------------------------------------------------------------------------------------------------------------------------------------------------------------------------------------------------------------------------------------------------------------------------------------------------------------------------------------------------------------------------------------------------------------------------------------------------------------------------------------------------------------------------------------------------------------------------------------------------------------------------------------------------------------------------------------------------------------------------------------------------------------------------------------------------------------------------------------------------------------------------------------------------------------------------------------------------------------------------------------------------------|
| Journal:                      | <i>BMJ Open</i>                                                                                                                                                                                                                                                                                                                                                                                                                                                                                                                                                                                                                                                                                                                                                                                                                                                                                                                                                                                                                                                                                                                                                                                                                                                                                                                                                                                                                                                                                                                                          |
| Manuscript ID                 | bmjopen-2018-028511                                                                                                                                                                                                                                                                                                                                                                                                                                                                                                                                                                                                                                                                                                                                                                                                                                                                                                                                                                                                                                                                                                                                                                                                                                                                                                                                                                                                                                                                                                                                      |
| Article Type:                 | Research                                                                                                                                                                                                                                                                                                                                                                                                                                                                                                                                                                                                                                                                                                                                                                                                                                                                                                                                                                                                                                                                                                                                                                                                                                                                                                                                                                                                                                                                                                                                                 |
| Date Submitted by the Author: | 11-Dec-2018                                                                                                                                                                                                                                                                                                                                                                                                                                                                                                                                                                                                                                                                                                                                                                                                                                                                                                                                                                                                                                                                                                                                                                                                                                                                                                                                                                                                                                                                                                                                              |
| Complete List of Authors:     | <p>Fernandes, Ricardo; Hospital de Santa Maria, Pediatrics; Laboratory of Clinical Pharmacology and Therapeutics, Faculty of Medicine, Instituto de Medicina Molecular, University of Lisbon</p> <p>Wingert, Aileen; University of Alberta Faculty of Medicine and Dentistry, Alberta Research Centre for Health Evidence</p> <p>Vandermeer, Ben; University of Alberta Faculty of Medicine &amp; Dentistry, Alberta Research Centre for Health Evidence</p> <p>Featherstone, Robin; University of Alberta Faculty of Medicine &amp; Dentistry, Alberta Research Centre for Health Evidence</p> <p>Ali, Samina; University of Alberta, Pediatrics; Women &amp; Children's Health Research Institute, Pediatrics, University of Alberta</p> <p>Plint, AMy; University of Ottawa,</p> <p>Stang, Antonia; University of Calgary, Pediatrics, Emergency Medicine, Community Health Sciences</p> <p>Rowe, Brian; University of Alberta, Emergency Medicine; University of Alberta, School of Public Health</p> <p>Johnson, David; University of Calgary Cumming School of Medicine, Pediatrics, Emergency Medicine, and Physiology and Pharmacology</p> <p>Allain, Dominic; University of Alberta, Pediatrics, Faculty of Medicine &amp; Dentistry</p> <p>Klassen, Terry; Manitoba Institute of Child Health &amp; Associate Dean of Academic, Faculty of Medicine, University of Manitoba</p> <p>Hartling, Lisa; University of Alberta, Pediatrics; University of Alberta Faculty of Medicine and Dentistry, Alberta Research Centre for Health Evidence</p> |
| Keywords:                     | corticosteroids, Asthma < THORACIC MEDICINE, bronchiolitis, croup, PAEDIATRICS, safety                                                                                                                                                                                                                                                                                                                                                                                                                                                                                                                                                                                                                                                                                                                                                                                                                                                                                                                                                                                                                                                                                                                                                                                                                                                                                                                                                                                                                                                                   |
|                               |                                                                                                                                                                                                                                                                                                                                                                                                                                                                                                                                                                                                                                                                                                                                                                                                                                                                                                                                                                                                                                                                                                                                                                                                                                                                                                                                                                                                                                                                                                                                                          |

SCHOLARONE™  
Manuscripts

1  
2  
3 **Safety of Corticosteroids in Young Children with Acute Respiratory Conditions: A**  
4 **Systematic Review & Meta-Analysis**  
5

6 Ricardo M. Fernandes, Aileen Wingert, Ben Vandermeer, Robin Featherstone, Samina Ali, Amy  
7 C. Plint, Antonia S. Stang, Brian H. Rowe, David W. Johnson, Dominic Allain, Terry P. Klassen,  
8 Lisa Hartling  
9

10  
11 **Ricardo M. Fernandes**, Department of Pediatrics, Hospital de Santa Maria, Lisbon, Portugal;  
12 Laboratory of Clinical Pharmacology and Therapeutics, Faculty of Medicine, Instituto de  
13 Medicina Molecular, University of Lisbon, Lisbon, Portugal  
14

15  
16 **Aileen Wingert**, Alberta Research Centre for Health Evidence, Department of Pediatrics,  
17 Faculty of Medicine & Dentistry, University of Alberta, Edmonton Clinic Health Academy  
18 11405 – 87 Avenue, Edmonton, Alberta, Canada  
19

20  
21 **Ben Vandermeer**, Alberta Research Centre for Health Evidence, Department of Pediatrics,  
22 Faculty of Medicine & Dentistry, University of Alberta, Edmonton Clinic Health Academy  
23 11405 – 87 Avenue, Edmonton, Alberta, Canada  
24

25  
26 **Robin Featherstone**, Alberta Research Centre for Health Evidence, Department of Pediatrics,  
27 Faculty of Medicine & Dentistry, University of Alberta, Edmonton Clinic Health Academy  
28 11405 – 87 Avenue, Edmonton, Alberta, Canada  
29

30  
31 **Samina Ali**, Department of Pediatrics, Faculty of Medicine & Dentistry, University of Alberta,  
32 Edmonton Clinic Health Academy 11405 – 87 Avenue, Edmonton, Alberta, Canada; Women &  
33 Children's Health Research Institute, Department of Pediatrics, University of Alberta, 5-083  
34 Edmonton Clinic Health Academy 11405 – 87 Avenue, Edmonton, Alberta, Canada  
35

36  
37 **Amy C. Plint**, Department of Pediatrics, University of Ottawa, Children's Hospital of Eastern  
38 Ontario 401 Smyth Road, Ottawa, Ontario, Canada  
39

40  
41 **Antonia S. Stang**, Departments of Pediatrics, Emergency Medicine, Community Health  
42 Sciences, University of Calgary, 2500 University Drive NW, Calgary, Alberta, Canada  
43

44  
45 **Brian H. Rowe**, Department of Emergency Medicine, University of Alberta, 8440 – 112 Street  
46 NW, Edmonton, Alberta, Canada; School of Public Health, University of Alberta, Edmonton  
47 Clinic Health Academy 11405 – 87 Avenue, Edmonton, Alberta, Canada  
48

49  
50 **David W. Johnson**, Departments of Pediatrics, Emergency Medicine, and Physiology and  
51 Pharmacology, Cumming School of Medicine, University of Calgary, 2500 University Drive  
52 NW, Calgary, Alberta, Canada  
53

54  
55 **Dominic Allain**, Department of Pediatrics, Faculty of Medicine & Dentistry, University of  
56 Alberta, Edmonton Clinic Health Academy 11405 – 87 Avenue, Edmonton, Alberta, Canada  
57  
58  
59  
60

1  
2  
3 **Terry P. Klassen**, Manitoba Institute of Child Health, University of Winnipeg, Children's  
4 Hospital of Research Institute of Manitoba 513 – 715 McDermot Avenue, Winnipeg, Manitoba,  
5 Canada  
6

7  
8 **Lisa Hartling**, Alberta Research Centre for Health Evidence, Department of Pediatrics, Faculty  
9 of Medicine & Dentistry, University of Alberta, Edmonton Clinic Health Academy 11405 – 87  
10 Avenue, Edmonton, Alberta, Canada; Department of Pediatrics, Faculty of Medicine &  
11 Dentistry, University of Alberta, Edmonton Clinic Health Academy 11405 – 87 Avenue,  
12 Edmonton, Alberta, Canada  
13

14  
15  
16 **Corresponding author:** Dr. Lisa Hartling, 11405 - 87 Avenue, Edmonton, Alberta, T6G 1C9,  
17 Canada; phone: 780-492-6124; e-mail: [hartling@ualberta.ca](mailto:hartling@ualberta.ca);  
18

19 **Manuscript = 3654 words**  
20  
21  
22  
23  
24  
25  
26  
27  
28  
29  
30  
31  
32  
33  
34  
35  
36  
37  
38  
39  
40  
41  
42  
43  
44  
45  
46  
47  
48  
49  
50  
51  
52  
53  
54  
55  
56  
57  
58  
59  
60

## ABSTRACT (300 words)

**Objective:** To systematically review adverse events (AEs) with short-term corticosteroid use for respiratory conditions in young children.

**Design:** Systematic review of primary studies. Literature searches were conducted in Medline, Cochrane CENTRAL, Embase, and regulatory agencies. Study selection and methodological quality (McHarm scale) involved duplicate independent reviews. One reviewer extracted with another reviewer verifying data. Meta-analyses used Peto odds ratios (pOR) and Mantel-Haenszel risk differences (random effects model), with 95% confidence intervals (CI). Subgroup analyses were conducted for respiratory condition and dose.

**Eligibility criteria and outcome measure(s):** Children <6 years with an acute respiratory condition, given inhaled (high-dose) or systemic corticosteroids up to 14 days, were eligible. We extracted AEs as reported by study authors and used a categorization model by organ systems.

**Results:** Eighty-five studies (11,505 children) were included; most were randomized trials (n=68). Methodological quality was poor overall due to lack of assessment and inadequate reporting of AEs. Meta-analysis of six studies (1,373 children) found fewer cases of vomiting comparing oral dexamethasone with prednisone (pOR 0.29, 95% CI 0.17 to 0.48; I<sup>2</sup>=0%). The mean difference in change-from-baseline height after one year between inhaled corticosteroid and placebo was 0.10 cm (two studies, n=268; 95% CI -0.47, 0.67). Results from five studies with heterogeneous interventions, comparators, and measurements, were not pooled; one study found a smaller mean change in height z-score with recurrent high-dose inhaled fluticasone over one year. No statistically significant differences were found comparing systemic or inhaled corticosteroid with placebo, or between corticosteroids, for other AEs; CIs around estimates were often wide, due to small samples and few events.

**Conclusions:** Evidence suggests that short-term high-dose inhaled or systemic corticosteroids use is not associated with an increase in AEs across organ systems. Uncertainties remain, particularly for recurrent use and growth outcomes, due to low study quality, poor reporting and imprecision.

### Strengths and limitations of this study:

- Examined safety outcomes associated with short-term corticosteroid use across multiple common acute respiratory conditions in young children
- Broad range of adverse events captured across organ systems
- Inconsistent definitions, assessments and reporting of adverse events
- Extensive variation in corticosteroid formulations and dosages within and between studies
- Did not examine long-term corticosteroid use (more than 14 days)

## INTRODUCTION

Corticosteroids are the cornerstone of treatment for many common pediatric respiratory conditions including croup and asthma.<sup>1-3</sup> These conditions often result in presentation to urgent and emergency care settings, in otherwise healthy children. Previous studies examining corticosteroid use in chronic asthma have demonstrated the potential for short- and long-term adverse events, particularly growth inhibition, bone disease, and adrenal suppression.<sup>4-6</sup> While corticosteroids have demonstrated effectiveness for the acute treatment of many respiratory indications, clinicians are faced with considerable uncertainty regarding short-term safety, particularly among the youngest children.<sup>1</sup>

Previous systematic reviews have examined corticosteroids in preschool or school-aged asthma or wheezing;<sup>4, 7, 8</sup> however, most focused on efficacy and were restricted to randomized controlled trials (RCTs). These reviews also focused on a specific underlying condition, disease severity, or particular corticosteroid, and mostly for longer-term administration (e.g., for recurrent, persistent or chronic asthma). Current guidance on systematic assessment of harms highlights the need to include data from observational studies when considering safety outcomes.<sup>9</sup> As well, it has been suggested that it may be useful to have a wider view of the evidence across a number of similar indications.<sup>10</sup> Recent knowledge synthesis approaches have studied specific safety outcomes across conditions to increase power, with the assumption that some safety outcomes are not confounded by condition.<sup>10</sup> Such a comprehensive approach to knowledge synthesis in this area is critical to inform treatment decisions, reduce practice variation, and optimize management of young children who seek care due to acute respiratory illness.

1  
2  
3 The goal of this study was to synthesize evidence regarding the safety of short course  
4 corticosteroid use in young children (less than six years) with acute respiratory conditions.  
5  
6  
7  
8  
9

## 10 **METHODS**

11  
12 This review followed internationally recommended methods and standards for systematic  
13 reviews.<sup>11-13</sup> An *a priori* protocol was developed (available from authors).  
14  
15  
16  
17  
18

### 19 **Literature search**

20  
21 Original database searches were conducted September 2014 in Ovid Medline, the Cochrane  
22 Central Register of Controlled Trials (CENTRAL) via Wiley Cochrane Library, and Ovid  
23 Embase. Additional sources included regulatory agency databases: Drugs@FDA, Health  
24 Canada's Drug Products Database, and the European Medicines Agency's European Public  
25 Assessment Reports. Search strategies combined index terms and keywords for respiratory  
26 illnesses, children and drug classes identified in the Global Initiative for Asthma (GINA)<sup>14</sup>  
27 guidelines. Study design filters were applied to limit results to RCTs and observational studies.  
28  
29 Update searches were executed in Medline and CENTRAL in February 2016, and then again in  
30  
31 July 2017. Detailed search strategies are in Supplement 1.  
32  
33  
34  
35  
36  
37  
38  
39  
40  
41  
42  
43

### 44 **Eligibility criteria**

45  
46 We included primary studies involving children up to six years old treated with single or  
47 recurrent systemic (any dose) or high-dose inhaled (as defined by the GINA guidelines<sup>14</sup>)  
48 corticosteroids for up to 14 days for an acute respiratory condition in an inpatient or outpatient  
49 setting. See Supplement 2 for detailed eligibility criteria.  
50  
51  
52  
53  
54  
55  
56  
57  
58  
59  
60

1  
2  
3  
4  
5 Given the lack of standardized terminology for safety, we gathered information on all potentially  
6 drug-related harm outcomes<sup>15</sup> from studies including, but not limited to: adverse drug reactions,  
7  
8 adverse drug events, medication errors, side effects and potential adverse drug events. For  
9  
10 consistency these outcomes are referred to in the manuscript as adverse events (AEs). Studies  
11  
12 that did not report or mention AEs were excluded. Due to resource constraints and mean age of  
13  
14 the studies, no attempt was made to contact study authors if no harms were reported in the text,  
15  
16 or when there was potentially missing data; such efforts are unlikely to yield additional data.  
17  
18  
19  
20  
21  
22  
23

### 24 **Study selection**

25  
26 Two reviewers independently screened the titles and abstracts of all records using *a priori*  
27  
28 selection criteria. Full texts of potentially eligible studies were reviewed by two reviewers  
29  
30 independently using a standard form. Disagreements were resolved through consensus or  
31  
32 consultation with a third reviewer.  
33  
34  
35  
36  
37

### 38 **Data extraction**

39  
40 One reviewer extracted data using a structured form, with verification by a second reviewer.  
41  
42 Data were extracted on study characteristics (design features), patient characteristics (age, sex,  
43  
44 baseline characteristics), respiratory conditions, interventions (type, dose, duration, route of  
45  
46 administration, timing, co-interventions, rescue medications), outcomes (types and timing), care  
47  
48 setting, funding sources, and results.  
49  
50  
51  
52  
53  
54  
55  
56  
57



1  
2  
3 AEs were extracted as reported by study authors and categorized using a published model based  
4 on organ systems (see Results).<sup>16</sup> A panel of clinicians with specialties in pediatrics, emergency  
5 medicine, respiratory medicine and clinical pharmacology rated each AE in order of clinical  
6 severity independent of knowledge of the study results.  
7  
8  
9  
10  
11  
12  
13

### 14 **Assessment of methodological quality**

15  
16  
17 Two reviewers independently assessed the methodological quality of studies using the McMaster  
18 Quality Assessment Scale for Harms (McHarm)<sup>17</sup>; disagreements were resolved through  
19 discussion.  
20  
21  
22  
23  
24  
25

### 26 **Data synthesis**

27  
28 A comparative summary of AEs for studies with more than one treatment arm was presented to  
29 provide an overall picture of which interventions had a high risk of specific AEs. Data for AEs  
30 were pooled using a Peto odds ratio (pOR) and a risk difference (RD) using a Mantel-Haenszel  
31 random effects model, with 95% confidence intervals (CI). Studies that reported at least one  
32 event in at least one treatment arm were included in the analysis of pORs and all comparative  
33 studies were used for analysis of RD. One AE (growth) was reported as a continuous outcome  
34 and data were pooled using a mean difference (MD; in cm). The I<sup>2</sup> statistic was presented to  
35 quantify the magnitude of statistical heterogeneity between studies.<sup>18</sup> Subgroup analyses from  
36 study-level data were conducted for respiratory condition and dose (single versus multi-dose)  
37 using Cochran's Q ( $\alpha=0.05$ ) to detect statistical heterogeneity. Studies contributing no numerical  
38 data for analysis (e.g., single arm studies, studies that reported no AEs overall) are summarized  
39 in Supplement 3. Assessment of small-study bias (for meta-analyses with at least eight studies)  
40  
41  
42  
43  
44  
45  
46  
47  
48  
49  
50  
51  
52  
53  
54  
55  
56  
57  
58  
59  
60

1  
2  
3 was planned using the funnel plot and Egger's test;<sup>19</sup> however, this was not conducted due to  
4 inadequate number of studies for each outcome. Analyses were conducted using Review  
5 Manager Version 5.3 (Cochrane Collaboration).<sup>20</sup> Graphs were constructed using TIBCO  
6  
7  
8  
9  
10 Spotfire S+ Workbench, Version 3.4.<sup>21</sup>  
11  
12  
13

## 14 **RESULTS**

15  
16 Database and grey literature searches yielded 9,134 records. Eighty-six papers (85 studies)<sup>22-107</sup>  
17 involving 11,505 participants were included (Figure 1). Characteristics of the included studies  
18 are in Supplement 3. There was large variation in corticosteroid type, dose, duration and route of  
19 administration, both for systemic and inhaled corticosteroids. Methodological quality of studies  
20 was poor overall due to inadequate reporting of how AEs were defined and collected  
21  
22  
23  
24  
25  
26  
27  
28  
29 (Supplement 4).  
30  
31  
32

### 33 **Adverse events**

34  
35 Results below are presented according to the categories in Table 1. Figures 2, 3 and 4 display  
36 forest plots of AEs comparing systemic corticosteroid to placebo, inhaled corticosteroid to  
37 placebo, and systemic dexamethasone to another systemic corticosteroid, respectively. Results of  
38 meta-analyses and subgroup analyses are in Supplement 5, with effect estimates and 95% CIs.  
39  
40  
41  
42  
43  
44  
45  
46  
47  
48  
49  
50  
51  
52  
53  
54  
55  
56  
57  
58  
59  
60 There was large variation in the number of studies and number of patients with available data for  
meta-analysis across comparisons and outcomes. Further, for four safety outcomes there were no  
events in both study arms (double-zero) across studies. In most cases the subgroup analyses by  
dose and condition did not differ substantially from the overall results. Studies reporting no AEs  
overall are summarized in Supplement 6.

### *Infections & Respiratory System*

The number of studies contributing to each meta-analysis ranged from one to seven (range 58 to 2,178 children). There were no statistically significant differences between: a) *systemic corticosteroid compared to placebo* for severe infections,<sup>29, 73, 95, 98</sup> systemic infections,<sup>29, 39, 42, 82</sup> infections of the lung/trachea,<sup>29, 39, 53, 73, 95, 97, 104</sup> and the upper respiratory tract,<sup>29, 42, 53, 64, 66, 73</sup> and voice complaints<sup>42</sup> (estimated pORs between 0.15 and 1.26) and b) *inhaled corticosteroid compared to placebo* for severe infections,<sup>44</sup> systemic infections,<sup>42, 44</sup> lung/trachea,<sup>44</sup> infections of the upper respiratory tract<sup>36, 42, 44, 64-66</sup> or voice complaints<sup>36, 42, 99, 100</sup> (estimated pORs between 0.54 and 1.51). No study comparing *dexamethasone with another corticosteroid* reported infections or respiratory AEs.

### *Gastro-Intestinal Tract (GI)*

The number of studies contributing to each meta-analysis ranged from one to seven (range 97 to 3,176 children). There were no statistically significant differences between: a) *systemic corticosteroid and placebo* for GI bleeding,<sup>29, 31, 39, 64, 82, 86, 104</sup> vomiting,<sup>29, 37, 39, 41, 69, 80, 82</sup> abdominal pain,<sup>29</sup> or diarrhea;<sup>41, 76, 104</sup> and b) *inhaled corticosteroid and placebo* for GI bleeding,<sup>64</sup> vomiting,<sup>36, 44, 68, 84, 100</sup> or diarrhea.<sup>36, 44</sup> Estimated pORs for both comparisons ranged from 0.89 to 1.10.

Meta-analysis of six studies (1,373 children)<sup>24, 26, 40, 48, 51, 79</sup> found fewer cases of vomiting in patients who received *dexamethasone compared with another corticosteroid*, although the number of events was small (12/663 versus 51/710 cases; pOR 0.29, 95% CI 0.17, 0.48; I<sup>2</sup>=0%). These studies focused on asthma (n=3),<sup>26, 40, 79</sup> croup (n=2),<sup>48, 51</sup> or both (n=1);<sup>24</sup> all compared

1  
2  
3 oral dexamethasone with oral prednisone. No statistically significant difference was found for  
4 abdominal pain between *dexamethasone and another corticosteroid*.<sup>24, 26, 51</sup>  
5  
6  
7  
8  
9

### 10 *CNS & Behaviour Effects*

11  
12 The number of studies for each meta-analysis ranged from one to five (range 70 to 1,159  
13 children). The estimated pORs for the *systemic corticosteroid and placebo* were 1.44 for  
14 tremor/jitteriness,<sup>37, 54, 69, 76, 82</sup> 1.95 for behaviour change,<sup>29, 41, 66, 76</sup> and 0.11 for headache,<sup>37</sup> with  
15  
16  
17  
18 no statistically significant differences. There were also no differences between *inhaled*  
19  
20  
21 *corticosteroid and placebo* for behaviour change,<sup>66, 84, 100</sup> and *dexamethasone and another*  
22  
23 *corticosteroid* for behaviour change,<sup>51, 56</sup> headache,<sup>26, 51</sup> or tremor/jitteriness,<sup>51</sup> the latter with an  
24  
25  
26  
27  
28  
29  
30  
31  
32  
33  
34  
35  
36  
37  
38  
39  
40  
41  
42  
43  
44  
45  
46  
47  
48  
49  
50  
51  
52  
53  
54  
55  
56  
57  
58  
59  
60  
estimated pOR of 6.63 from a small study (n=87) with only one reported event.

### 31 *Dermatologic Conditions*

32  
33 The number of studies per meta-analysis ranged from one to four (range 32 to 1,079 children).  
34  
35  
36  
37  
38  
39  
40  
41  
42  
43  
44  
45  
46  
47  
48  
49  
50  
51  
52  
53  
54  
55  
56  
57  
58  
59  
60  
There were no statistically significant differences between: a) *systemic corticosteroid and placebo* for rash and hives,<sup>29, 41, 66</sup> albeit with an estimated pOR of 7.59 (4/536 versus 0/543; 95% CI 1.07, 54.01); and b) *inhaled corticosteroid and placebo* for rash,<sup>36, 44, 84</sup> hives<sup>66</sup> and burning sensation<sup>67</sup> (estimated pORs 0.88 and 0.14, respectively). No events of phlebitis were reported comparing *dexamethasone to another corticosteroid*.<sup>56</sup>

### 49 *Endocrine/metabolic & Musculoskeletal Systems*

1  
2  
3 There were no statistically significant differences for electrolyte abnormalities between *systemic*  
4 *corticosteroid and placebo* (estimated pOR 3.08)<sup>29, 46, 82, 101</sup> and *dexamethasone to another*  
5 *corticosteroid* (estimated pOR 0.18).<sup>101</sup>  
6  
7  
8  
9  
10

11  
12 Pooled data for linear growth between *inhaled corticosteroid and placebo* included two studies  
13 (n=263) using recurrent doses for acute wheeze with follow-up at one year.<sup>27, 44</sup> The estimated  
14 change-from-baseline height was small (MD 0.10 cm; 95% CI -0.47 to 0.67; I<sup>2</sup>=9%). Five  
15 studies reported measurements of growth (height and weight) ranging from one to three years of  
16 follow-up, which could not be pooled due to heterogeneous interventions, comparators, or  
17 outcome measurements.<sup>28, 30, 44, 57, 70</sup> Three studies included data on inhaled corticosteroid versus  
18 placebo. One RCT on asthma<sup>57</sup> (n=20) comparing budesonide and placebo found no signs of  
19 growth retardation by height measurements at 12 months or after up to six treatments. An RCT  
20 of episodic wheeze<sup>28</sup> (n=294) found height at three years of age was unaffected in children  
21 receiving budesonide or placebo. One RCT of inhaled fluticasone propionate at very high doses  
22 (1500 mcg daily during upper respiratory infections) versus placebo in recurrent wheeze<sup>44</sup>  
23 reported additional outcome data on height that was not pooled in the meta-analysis mentioned  
24 above. There was a smaller mean change in height z score in the corticosteroid group over one  
25 year (MD -0.24; 95% CI -0.40 to -0.08; adjusted results).<sup>44</sup> Furthermore, mean weight was  
26 significantly lower at one-year follow-up in the fluticasone group (n=62) versus placebo (n=67);  
27 two children given fluticasone and one given placebo met criteria for 'failure to thrive'.<sup>44</sup> Finally,  
28 two small trials did not report group differences for other comparisons: total and mean height  
29 growth (at eight to 19 months) for intravenous (IV) dexamethasone versus inhaled budesonide in  
30 asthma (n=18);<sup>70</sup> weight and height gains at two years for theophylline and metaproterenol with  
31  
32  
33  
34  
35  
36  
37  
38  
39  
40  
41  
42  
43  
44  
45  
46  
47  
48  
49  
50  
51  
52  
53  
54  
55  
56  
57  
58  
59  
60

1  
2  
3 or without systemic prednisone on prevention of wheeze during upper respiratory infections in  
4  
5 asthma (n=32).<sup>30</sup>  
6  
7

8  
9  
10 Five studies reported on adrenal function/suppression, with few children contributing data for  
11 this outcome.<sup>44, 56, 57, 70, 88</sup> The RCT of high-dose inhaled fluticasone propionate versus placebo  
12 (99 children with data)<sup>44</sup> found no significant differences between groups in basal cortisol  
13 (baseline and 12 months). Another RCT in asthma reported no differences in serum cortisol and  
14 urinary cortisol/creatinine after 10 days of inhaled budesonide or placebo (16 children with data).  
15 A subgroup who received oral betamethasone (n=9) showed significant changes from baseline  
16 after three days, but no differences at 12 to 14 days.<sup>57</sup> Two studies included comparisons  
17 between different corticosteroids. One RCT<sup>88</sup> in acute asthma compared IV prednisolone (n=20)  
18 with nebulized budesonide (n=30) and found significant levels of suppressed serum cortisol in  
19 the prednisolone group, albeit not considered pathologic by the study authors. Although another  
20 RCT<sup>56</sup> comparing intramuscular (IM) dexamethasone with oral prednisone for asthma (n=32)  
21 found lower median urinary cortisol/creatinine in the former group at day 14, there was no  
22 statistically significant difference. An RCT<sup>70</sup> comparing IV dexamethasone (n=9) with inhaled  
23 budesonide (n=9) found no significant differences between groups from baseline for blood  
24 pressure and blood glucose measurements.  
25  
26  
27  
28  
29  
30  
31  
32  
33  
34  
35  
36  
37  
38  
39  
40  
41  
42  
43  
44

45  
46  
47 Five studies reported on bone health biomarkers, three of which compared inhaled  
48 corticosteroids and placebo; no pooled analyses were performed.<sup>28, 44, 57, 60, 91</sup> One RCT<sup>28</sup>  
49 compared inhaled budesonide (n=294) with placebo in episodic wheeze and found no effect on  
50 bone mineral density over three years. The RCT comparing high-dose inhaled fluticasone  
51  
52  
53  
54  
55  
56  
57

propionate with placebo (n=59 children with data) in viral wheeze<sup>44</sup> reported no statistically significant differences between groups in lumbar bone mineral density, bone mineral content or bone age at 12 months. A small RCT<sup>57</sup> comparing inhaled budesonide with placebo (n=20) in asthma found transient decreased levels of bone and collagen markers post-treatment and in a subset of children who received oral betamethasone, with no difference between groups. A study of patients with acute respiratory illness<sup>91</sup> compared hydrocortisone (n=28), methylprednisone (n=21) and controls (n=51) and found decreased levels of osteocalcin and alkaline phosphatase in younger children two days post-treatment; these effects were reversed 12 days after treatment. A non-randomized controlled trial (nRCT) of 36 asthma patients<sup>60</sup> compared IV methylprednisolone of three different durations and found that all had decreasing levels of serum osteocalcin that correlated with increasing duration of treatment.

### *Cardiovascular System*

No significant differences were found between *systemic corticosteroid and placebo* in three bronchiolitis studies reporting hypertension (estimated pOR 1).<sup>31, 39, 82</sup> Single studies with up to 110 children did not report events for arrhythmia<sup>42</sup> and congestive heart failure<sup>46</sup> (*systemic or inhaled corticosteroid versus placebo*); and arrhythmia<sup>26</sup> or hypertension<sup>56</sup> (*dexamethasone with another corticosteroid*).

### *General AEs/ Other Symptoms*

Meta-analyses included a total of two studies (range 197 to 869 children). There were no statistically significant differences between: a) *systemic corticosteroid and placebo* for pallor;<sup>69</sup>

1  
2  
3 <sup>82</sup> and b) *dexamethasone with another corticosteroid* for dizziness<sup>51</sup> or excessive urination.<sup>26</sup> No  
4  
5 study comparing *inhaled corticosteroid with placebo* reported general AEs.  
6  
7

### 8 9 10 *Immune System & Oncology*

11  
12 One study (95 participants)<sup>38</sup> compared *systemic corticosteroid and placebo* and found no  
13  
14 occurrences of immunosuppression. No other study reported immune system-related AEs.  
15  
16

## 17 18 19 **DISCUSSION**

20  
21 This systematic review of studies in which short-course corticosteroids were administered to  
22  
23 children under six years of age for acute respiratory conditions, included 85 studies involving  
24  
25 more than 11,000 patients. These studies used a variety of delivery routes, doses, formulations  
26  
27 and duration of corticosteroids. Overall, the evidence suggests that short-term corticosteroid use  
28  
29 is not associated with a significant increase in AEs across organ systems. However, given the  
30  
31 low quality of included studies, the heterogeneous and poor reporting of AEs, and the lack of  
32  
33 precision of results, considerable uncertainties remain regarding the safety of high-dose inhaled  
34  
35 or systemic corticosteroids for these indications in this age range. Importantly, these results can  
36  
37 help guide future research in the collection and reporting of AEs, particularly concerning  
38  
39 measures of growth and behavioral outcomes; this in turn is needed to help inform shared  
40  
41 decision-making between clinicians and parents/caregivers of young children.  
42  
43  
44  
45  
46  
47  
48

49 A common concern when using corticosteroids in young children is effect on growth. Results  
50  
51 from a single, small trial (n=129) of recurrent high-dose inhaled fluticasone propionate in  
52  
53 wheezing preschoolers were heterogeneous across outcome measures, but suggested a small  
54  
55  
56  
57



1  
2  
3 significant risk of growth suppression.<sup>44</sup> Observational data have also suggested that multiple  
4 corticosteroid bursts can increase the risk of growth suppression, fractures, bone mineral  
5 accretion and osteopenia in children with underlying respiratory disease.<sup>5, 6, 108</sup> Conversely, a  
6 pooled analysis using change-from-baseline linear growth did not find significant differences,  
7 albeit the other included study used a substantially lower equivalent dose of inhaled  
8 corticosteroid.<sup>109</sup> Further, results from individual studies reporting transient differences in bone  
9 and adrenal biomarkers are of unclear clinical relevance, particularly for previously healthy  
10 children and single use. This calls for caution and monitoring of linear growth, particularly when  
11 use of high-dose inhaled or systemic corticosteroid is recurrent.  
12  
13  
14  
15  
16  
17  
18  
19  
20  
21  
22  
23  
24  
25

26 We found no other statistically significant differences between systemic or inhaled corticosteroid  
27 and placebo, or between dexamethasone and other systemic corticosteroid, including subgroup  
28 analyses by respiratory condition or dose, for AEs across organ systems. Due to small sample  
29 sizes and low number of events, these results should be interpreted with caution. While we found  
30 increased pORs when comparing systemic corticosteroids for behavioural outcomes such as  
31 tremor/jitteriness and behaviour change, there were wide confidence intervals around estimates.  
32  
33 No study examined neurodevelopmental outcomes after corticosteroid administration; ideally,  
34 studies should assess children for potentially related long-term AEs using validated instruments  
35 in this domain. Results from case series and case reports added anecdotal evidence of rare cases  
36 of hypersensitivity, infection or behavioral AEs, which have been described.<sup>110, 111</sup> While the  
37 estimated increased pOR for rash and hives was close to statistical significance, no other  
38 differences were found in systemic or severe infections as well as immunosuppression.  
39  
40  
41  
42  
43  
44  
45  
46  
47  
48  
49  
50  
51  
52  
53  
54  
55  
56  
57  
58  
59  
60

1  
2  
3 This review did not ascertain a clear safety advantage between systemic or inhaled  
4 corticosteroids compared with placebo. When comparing between different systemic  
5 corticosteroids, evidence favored oral dexamethasone over oral prednisone for vomiting (pOR  
6 0.029; 95% CI 0.17 to 0.48;  $I^2=0\%$ ). Differences in palatability and tolerability between  
7 corticosteroids are well known to parents, healthcare providers and researchers, and can  
8 influence adherence to medication in children.<sup>112</sup> Further, different specific formulations of  
9 corticosteroid (e.g., prednisolone tablets versus prednisolone syrup) have been shown to  
10 influence taste and vomiting.<sup>24</sup> However, cost and access to better tolerated formulations may be  
11 problematic. Subgroup analyses also found no significant differences between groups by  
12 respiratory condition or dose (single versus multiple) for these outcomes. Due to extensive  
13 variation in dosing within and across studies, we were unable to analyze data or draw further  
14 conclusions with respect to dosage or differences between specific molecules. It should be noted  
15 that among the eight RCTs<sup>34, 42, 45, 50, 64, 66, 70, 88</sup> directly comparing systemic and inhaled routes of  
16 corticosteroid administration, none contributed meaningful data for meta-analysis. The decision  
17 to initiate corticosteroid and the selection of drug, dose and mode of administration must  
18 consider these uncertainties on harms, as well as existing evidence on comparative potency and  
19 clinical effectiveness. The risk-benefit rationale is less established for repeated acute use in  
20 younger children, such as in recurrent wheezing.<sup>113</sup>

### 21 22 23 24 25 26 27 28 29 30 31 32 33 34 35 36 37 38 39 40 41 42 43 44 45 46 47 **Strengths and limitations**

48  
49 We conducted a comprehensive systematic review of the literature following rigorous methods,  
50 including grey literature, to minimize potential for publication and selection bias. We examined  
51 safety outcomes across multiple acute respiratory conditions using 'baskets' of outcomes in each  
52  
53  
54  
55  
56  
57  
58  
59  
60

1  
2  
3 organ system to increase our ability to detect rare events and the precision of our estimates.<sup>16</sup>  
4  
5 This approach is reflective of clinical practice where corticosteroids are used across many  
6  
7 respiratory diseases, even if the evidence base is not entirely robust for children. A recent  
8  
9 systematic review also assessed the toxicity of short-course oral corticosteroids in children across  
10  
11 clinical conditions.<sup>114</sup> However, there was scarce overlap in respiratory conditions across  
12  
13 included studies, and authors mostly provided estimates of the incidence of AEs within treatment  
14  
15 groups rather than comparative treatment effects. Studies in adults have also adopted similar  
16  
17 approaches to estimate incidence rates of AEs. For example, findings from a recent retrospective  
18  
19 cohort in adults showed a significant increase in rates of sepsis, venous thromboembolism and  
20  
21 fracture.<sup>115</sup>  
22  
23  
24  
25  
26  
27

28 This review was limited by the quality of the primary literature, particularly regarding the  
29  
30 definition, assessment and reporting of AEs. This underscores the challenges researchers  
31  
32 encounter when attempting to synthesize safety data due to sparse and poor reporting,<sup>116</sup> and  
33  
34 highlights the urgent need to enhance detection and reporting of AEs. Common nomenclature  
35  
36 (e.g., [www.meddra.org](http://www.meddra.org)) and standardized approaches to collection of AE data should be  
37  
38 implemented to help draw comparisons across studies. Further, safety reporting was not a  
39  
40 primary focus of the studies, AEs were rarely defined a priori, and methods for ascertaining AEs  
41  
42 were usually absent. While the McHarm scale is recommended to be used in conjunction with  
43  
44 other quality assessment tools to evaluate the broader elements of study quality, we used it  
45  
46 exclusively to assess methodological quality since the primary focus of this review was on AEs.  
47  
48 The AEs reported typically reflect what is detected by a healthcare provider; it is difficult to  
49  
50 discern what is reported by patients as well as what patients consider important. The duration of  
51  
52  
53  
54  
55  
56  
57

1  
2  
3 surveillance of most studies was insufficient to detect many of the long-term AEs potentially  
4 associated with corticosteroid use. Although the present study suggests that single doses of  
5 systemic or inhaled corticosteroids may result in few AEs, recurrent courses may lead to long-  
6 term risks, as cumulative dosing has been shown to be a determinant of safety.<sup>108</sup> Finally, there  
7 was variation within and across studies with respect to maintenance corticosteroids, and  
8 concomitant and rescue medications. Due to the variation in corticosteroids and extensive range  
9 of AEs reported (including when a single study contributes to an outcome or in cases of zero  
10 events, where meta-analysis was not feasible or meaningful) amongst varied study designs of  
11 overall poor quality, we did not attempt to rate the quality of the body of the evidence using the  
12 Grading of Recommendations Assessment, Development and Evaluation (GRADE) approach.  
13  
14  
15  
16  
17  
18  
19  
20  
21  
22  
23  
24  
25  
26  
27

## 28 **CONCLUSION**

29  
30 This is the most comprehensive systematic review to date examining the safety of corticosteroids  
31 for managing acute respiratory conditions among young children, an age group of great clinical  
32 concern. While the existing evidence suggests that short-term high-dose inhaled or systemic  
33 corticosteroids is not associated with a significant increase in AEs across organ systems,  
34  
35  
36  
37  
38  
39  
40  
41  
42  
43  
44  
45  
46  
47  
48  
49  
50  
51  
52  
53  
54  
55  
56  
57  
58  
59  
60

## Tables

Table 1. Number of studies and participants reporting adverse events

## Figures

Figure 1. PRISMA study flow selection

Figure 2. Forest plot of adverse events – systemic versus placebo

Figure 3. Forest plot of adverse events – inhaled versus placebo

Figure 4. Forest plot of adverse events – dexamethasone versus other

## Supplementary data

Supplement 1 - Search strategy

Supplement 2 - Eligibility criteria for study inclusion

Supplement 3 - Characteristics of included studies

a. Summary characteristics of included studies

b. Summary characteristics of included studies – comparisons

Supplement 4 - Methodological quality of included studies

a. Summary of methodological quality assessments

b. Methodological quality assessments of included studies

Supplement 5 - Effect estimates for all adverse events with subgroups

a. Infection & respiratory system

b. Gastro-intestinal tract

c. CNS & behaviour effects

d. Dermatologic conditions

e. Endocrine/ metabolic & musculoskeletal system

f. Cardiovascular system

g. General adverse events/ other symptoms

h. Immune system & oncology

Supplement 6 - Studies reporting no adverse events

**Acknowledgments:** We gratefully acknowledge the following individuals for their contributions: Megan Nuspl, Sanjaya Dhakal and Pritam Chordiya for assisting with screening, initial data extraction and verification, and article retrieval; Marc Parsons for assisting with data extraction and verification, and quality assessment; and, Jack Yeung, Marta Oleszczuk and Igor Pravdivyi for assistance with translations. MN, SD, PC and MP received remuneration for their work from a Canadian Institutes of Health Research (CIHR) grant (funding reference number KRS134306). JY, MO and IP did not receive remuneration for the translation work. None of the acknowledged individuals have industry affiliations, or any conflicts of interest to declare.

**Contributors:** RMF, AW, BV, SA, ACP, ASS, BHR, DWJ, DA, TPK, and LH critically reviewed and contributed to drafts of the report. RF conducted the literature searches. AW

1  
2  
3 conducted screening, quality assessments, and data extraction. AW and BV conducted data  
4 analysis. RMF, AW, BV, SA, ACP, ASS, BHR, DWJ, DA, TPK, and LH contributed to  
5 interpretation of results. All of the authors approved the final version of this report.  
6  
7

8 **Funding:** This study was funded by a Knowledge Synthesis Grant from CIHR (funding  
9 reference number KRS134306). The funder had no role in the design of the study, the collection,  
10 analysis or interpretation of data, the writing of the report, or the decision to submit the paper for  
11 publication.  
12  
13  
14

15 **Competing interests:** All authors declare funding from CIHR for the submitted work. LH was  
16 funded in part by a New Investigator Salary Award from the CIHR; ASP is supported by a Tier  
17 II University of Ottawa Research Chair Award; BHR was supported by a Tier I Canada Research  
18 Chair in Evidence-based Emergency Medicine from CIHR. The remaining authors have no  
19 financial relationships relevant to this manuscript to disclose. DWJ, TPK and ASP are also  
20 authors on some of the included studies. The other authors have no conflicts of interest to  
21 declare.  
22  
23  
24

25 **Provenance and peer review:** Not commissioned; externally peer-reviewed.  
26  
27

28 **Data sharing statement:** Dr. Hartling had full access to all of the data in the study and takes  
29 responsibility for the integrity of the data and the accuracy of the data analysis. Data for this  
30 systematic review are available from the corresponding author upon reasonable request.  
31  
32  
33  
34  
35  
36  
37  
38  
39  
40  
41  
42  
43  
44  
45  
46  
47  
48  
49  
50  
51  
52  
53  
54  
55  
56  
57  
58  
59  
60

**REFERENCES**

1. de Benedictis FM, Bush A. Corticosteroids in respiratory diseases in children. *Am J Respir Crit Care Med* 2012;185(1):12-23.
2. Johnson D. Croup. *BMJ Clin Evid* 2009.
3. Russell KF, Liang Y, O'Gorman K, et al. Glucocorticoids for croup. *Cochrane Database Syst Rev* 2011;1(CD001955).
4. Adams NP, Bestall JC, Jones P, et al. Fluticasone at different doses for chronic asthma in adults and children. *Cochrane Database Syst Rev* 2008;4(CD003534).
5. Kelly HW, Sternberg AL, Lescher R, et al. Effect of inhaled glucocorticoids in childhood on adult height. *N Engl J Med* 2012;367(10):904-912.
6. van Staa T, Cooper C, Leufkens H, et al. Children and the risk of fractures caused by oral corticosteroids. *J Bone Miner Res* 2003;18(5):913-918.
7. Castro-Rodriguez JA, Rodrigo GJ. Efficacy of inhaled corticosteroids in infants and preschoolers with recurrent wheezing and asthma: A systematic review with meta-analysis. *Pediatrics* 2009;123(3):e519-525.
8. Zhang L, Axelsson I, Chung M, et al. Dose response of inhaled corticosteroids in children with persistent asthma: A systematic review. *Pediatrics* 2011;127(1):129-138.
9. Loke YK, Price D, Herxheimer A. Systematic reviews of adverse effects: Framework for a structured approach. *BMC Med Res Methodol* 2007;7(1):1-9.
10. Singh JA, Wells GA, Christensen R, et al. Adverse effects of biologics: A network meta-analysis and cochrane overview. *Cochrane Database Syst Rev* 2011;2(CD008794).
11. Higgins J, Green S. (editors). The Cochrane Handbook for Systematic Reviews of Interventions Version 5.1.0. [updated March 2011]. The Cochrane Collaboration, 2011. [www.cochrane-handbook.org](http://www.cochrane-handbook.org). Accessed. January 12, 2018.
12. Moher D, Liberati A, Tetzlaff J, et al. Preferred reporting items for systematic reviews and meta-analyses: The PRISMA statement. *J Clin Epidemiol* 2009;62(10):1006-1012.

13. Zorzela L, Loke YK, Ioannidis JP, et al. PRISMA harms checklist: Improving harms reporting in systematic reviews. *BMJ* 2016;352:i157.
14. Global Initiative for Asthma. Global strategy for asthma management and prevention. <http://www.ginasthma.org>. Accessed: January 12, 2018.
15. Nebeker JR, Barach P, Samore MH. Clarifying adverse drug events: A clinician's guide to terminology, documentation, and reporting. *Ann Intern Med* 2004;140(10):795-801.
16. Tugwell P, Judd MG, Fries JF, et al. Powering our way to the elusive side effect: A composite outcome 'basket' of predefined designated endpoints in each organ system should be included in all controlled trials. *J Clin Epidemiol* 2005;58(8):785-790.
17. Chou R, Aronson N, Atkins DL, et al. Assessing harms when comparing medication interventions. In: Agency for Healthcare Research and Quality (US). *Methods guide for effectiveness and comparative effectiveness reviews*. Rockville, MD; 2008.
18. Higgins JPT, Green S (editors). *The Cochrane Handbook for Systematic Reviews of Interventions*. Section 9.5.2: Identifying and measuring heterogeneity. [www.cochrane-handbook.org](http://www.cochrane-handbook.org). Accessed: January 24, 2018.
19. Egger M, Davey Smith G, Schneider M, et al. Bias in meta-analysis detected by a simple, graphical test. *BMJ* 1997;315(7109):629-634.
20. Review Manager (RevMan) [computer program]. Version 5.3. Copenhagen: The Nordic Cochrane Centre, The Cochrane Collaboration, 2014.
21. TS Inc. TIBCO Spotfire S+ Workbench, Version 3.4 [statistical software]. 1996.
22. Alangari AA, Malhis N, Mubasher M, et al. Budesonide nebulization added to systemic prednisolone in the treatment of acute asthma in children: A double-blind, randomized, controlled trial. *Chest* 2014;145(4):772-778.
23. Alansari KS, Sakran M, Davidson BL, et al. Oral dexamethasone for bronchiolitis: A randomized trial. *Pediatrics* 2013;132(4):e810-816.
24. Aljebab F, Alanazi M, Choonara I, et al. Observational study on the palatability and tolerability of oral prednisolone and oral dexamethasone in children in Saudi Arabia and the UK. *Arch Dis Child* 2017;103(1):83-88.



- 1  
2  
3 25. Alshehr M, Almegamsi T, Hammdi A. Efficacy of a small dose of oral dexamethasone in  
4 croup. *Biomed Res* 2005;16(1):65-72.  
5  
6  
7 26. Altamimi S, Robertson G, Jastaniah, W, et al. Single-dose oral dexamethasone in the  
8 emergency management of children with exacerbations of mild to moderate asthma.  
9 *Pediatr Emerg Care* 2006;22(12):786-793.  
10  
11  
12 27. Bacharier LB, Phillips BR, Zeiger RS, et al; Childhood Asthma Research and Education  
13 Network. Episodic use of an inhaled corticosteroid or leukotriene receptor antagonist in  
14 preschool children with moderate-to-severe intermittent wheezing. *J Allergy Clin*  
15 *Immunol* 2008;122(6):1127-1135.e8.  
16  
17  
18  
19 28. Bisgaard H, Hermansen MN, Loland L, et al. Intermittent inhaled corticosteroids in infants  
20 with episodic wheezing. *N Engl J Med* 2006;354(19):1998-2005.  
21  
22  
23 29. Bjornson CL, Klassen, TP, Williamson J, et al; Pediatric Emergency Research Canada  
24 Network. A randomized trial of a single dose of oral dexamethasone for mild croup. *N*  
25 *Engl J Med* 2004;351(13):1306-1313.  
26  
27  
28 30. Brunette MG, Lands L, Thibodeau LP. Childhood asthma: Prevention of attacks with short-  
29 term corticosteroid treatment of upper respiratory tract infection. *Pediatrics*  
30 1988;81(5):624-629.  
31  
32  
33 31. Buckingham SC, Jafri HS, Bush AJ, et al. A randomized, double-blind, placebo-controlled  
34 trial of dexamethasone in severe respiratory syncytial virus (RSV) infection: Effects on  
35 RSV quantity and clinical outcome. *J Infect Dis* 2002;185(9):1222-1228.  
36  
37  
38 32. Bülow SM, Nir M, Levin E, et al. Prednisolone treatment of respiratory syncytial virus  
39 infection: A randomized controlled trial of 147 infants. *Pediatrics* 1999;104(6):e77.  
40  
41  
42 33. Chang AB, Clark R, Sloots TP, et al. A 5- versus 3-day course of oral corticosteroids for  
43 children with asthma exacerbations who are not hospitalised: A randomised controlled  
44 trial. *Med J Aust* 2008;189(6):306-310.  
45  
46  
47 34. Chen ZG, Li M, Chen H, et al. Efficacy of pulmicort suspension plus salbutamol and  
48 ipratropium bromide for management of acute asthma exacerbation in children: A  
49 comparative study. *J South Med Univ* 2008;28(3):470-472.  
50  
51  
52  
53  
54  
55  
56  
57  
58  
59  
60

- 1  
2  
3 35. Chub-Uppakarn S, Sangsupawanich P. A randomized comparison of dexamethasone 0.15  
4 mg/kg versus 0.6 mg/kg for the treatment of moderate to severe croup. *Int J Pediatr*  
5 *Otorhinolaryngol* 2007;71(3):473-477.  
6  
7  
8 36. Clavenna A, Sequi M, Cartabia M, et al. Effectiveness of nebulized beclomethasone in  
9 preventing viral wheezing: An RCT. *Pediatrics* 2014;133(3):e505-512.  
10  
11  
12 37. Connett GJ, Warde C, Wooler E, et al. Prednisolone and salbutamol in the hospital treatment  
13 of acute asthma. *Arch Dis Child* 1994;70(3):170-173.  
14  
15  
16 38. Connolly JH, Field CMB, Glasgow JFT, et al. A double blind trial of prednisolone in  
17 epidemic bronchiolitis due to respiratory syncytial virus. *Acta Paediatr Scand*  
18 1969;58(2):116-120.  
19  
20  
21 39. Corneli HM, Zorc JJ, Mahajan P, et al; Bronchiolitis Study Group of the Pediatric  
22 Emergency Care Applied Research Network. A multicenter, randomized, controlled trial  
23 of dexamethasone for bronchiolitis. *N Engl J Med* 2007;357(4):331-339.  
24  
25  
26 40. Cronin JJ, McCoy S, Kennedy U, et al. A randomized trial of single-dose oral  
27 dexamethasone versus multidose prednisolone for acute exacerbations of asthma in  
28 children who attend the emergency department. *Ann Emerg Med* 2016;67(5):593-601.  
29  
30  
31 41. Csonka P, Kaila M, Laippala P, et al. Oral prednisolone in the acute management of children  
32 age 6 to 35 months with viral respiratory infection-induced lower airway disease: A  
33 randomized, placebo-controlled trial. *J Pediatr* 2003;143(6):725-730.  
34  
35  
36 42. Daugbjerg P, Brenøe E, Forchhammer H, et al. A comparison between nebulized terbutaline,  
37 nebulized corticosteroid and systemic corticosteroid for acute wheezing in children up to  
38 18 months of age. *Acta Paediatr* 1993;82(6-7):547-551.  
39  
40  
41 43. Dawson KP, Sharpe C. A comparison of the acceptability of prednisolone tablets and  
42 prednisolone sodium phosphate solution in childhood acute asthma. *Aust J Hosp Pharm*  
43 1993;23(5):320-323.  
44  
45  
46 44. Ducharme FM, Lemire C, Noya FJD, et al. Preemptive use of high-dose fluticasone for virus-  
47 induced wheezing in young children. *N Engl J Med* 2009;360(4):339-353.  
48  
49  
50 45. Eboriadou M, Chryssanthopoulou D, Stamoulis P, et al. The effectiveness of local  
51 corticosteroids therapy in the management of mild to moderate viral croup. *Minerva*  
52 *Pediatr* 2010;62(1):23-28.  
53  
54  
55  
56  
57  
58  
59  
60

- 1  
2  
3  
4  
5 46. Eden AN, Kaufman A, Yu R. Corticosteroids and croup. Controlled double-blind study.  
6 *JAMA* 1967;200(5):403-404.  
7
- 8  
9 47. Escobedo Chavez E, Garcia Muniz LO, Thompson Chagoyan O, et al. Steroids and  
10 inhalation therapy in the management of acute asthma in children. *Curr Ther Res Clin*  
11 *Exp* 1992;52(1):7-12.  
12
- 13  
14 48. Fifoot AA, Ting JYS. Comparison between single-dose oral prednisolone and oral  
15 dexamethasone in the treatment of croup: A randomized, double-blinded clinical trial.  
16 *Emerg Med Australas* 2007;19(1):51-58.  
17
- 18  
19 49. Fitzgerald D, Mellis C, Johnson M, et al. Nebulized budesonide is as effective as nebulized  
20 adrenaline in moderately severe croup. *Pediatrics* 1996;97(5):722-725.  
21  
22
- 23 50. Francis P, Geelhoed G, Harris MA, et al. Effect of nebulised fluticasone propionate 1 mg  
24 twice daily compared with oral prednisolone in pre-school children aged 48 months or  
25 less with an acute exacerbation of asthma [abstract]. *Eur Respir J* 1997(Suppl 25):275s.  
26  
27
- 28 51. Garbutt JMC, Bridget C, Sterkel R, et al. The comparative effectiveness of prednisolone and  
29 dexamethasone for children with croup: A community-based randomized trial. *Clin*  
30 *Pediatr (Phila)* 2013;52(11):1014-1021.  
31  
32
- 33 52. Ghirga G, Ghirga P, Fagioli S, et al. Intermittent treatment with high dose nebulized  
34 beclomethasone for recurrent wheezing in infants due to upper respiratory tract infection.  
35 *Minerva Pediatr* 2002;54(3):217-220.  
36  
37
- 38  
39 53. Gill N, Sirizzotti N, Johnson D, et al. Endogenous glucocorticoid response to single-dose  
40 dexamethasone for croup in children: A pharmacodynamic study. *Pediatr Emerg Care*  
41 2017;11.  
42  
43
- 44 54. Goebel J, Estrada B, Quinonez J, et al. Prednisolone plus albuterol versus albuterol alone in  
45 mild to moderate bronchiolitis. *Clin Pediatr (Phila)* 2000;39(4):213-220.  
46  
47
- 48 55. Grant CC, Duggan AK, Santosham M, et al. Oral prednisone as a risk factor for infections in  
49 children with asthma. *Arch Pediatr Adolesc Med* 1996;150(1):58-63.  
50  
51
- 52 56. Gries DM, Moffitt DR, Pulos E, et al. A single dose of intramuscularly administered  
53 dexamethasone acetate is as effective as oral prednisone to treat asthma exacerbations in  
54 young children. *J Pediatr* 2000;136(3):298-303.  
55  
56  
57

- 1  
2  
3  
4  
5 57. Hedlin G, Svedmyr J, Ryden AC. Systemic effects of a short course of betamethasone  
6 compared with high-dose inhaled budesonide in early childhood asthma. *Acta Paediatr*  
7 1999;88(1):48-51.  
8  
9  
10 58. Husby S, Agertoft L, Mortensen S, et al. Treatment of croup with nebulised steroid  
11 (budesonide): A double blind, placebo controlled study. *Arch Dis Child* 1993;68(3):352-  
12 325.  
13  
14  
15 59. Inglis AF. Herpes simplex virus infection. A rare cause of prolonged croup. *Arch*  
16 *Otolaryngol Head Neck Surg* 1993;119(5):551-552.  
17  
18  
19 60. Jan JS, Wu WF. Acute effect of glucocorticoid treatment on serum osteocalcin levels in  
20 asthmatic children. *J Microbiol Immunol Infect* 2000;33(1):25-28.  
21  
22  
23 61. Jartti T, Nieminen R, Vuorinen T, et al. Short- and long-term efficacy of prednisolone for  
24 first acute rhinovirus-induced wheezing episode. *J Allergy Clin Immunol*  
25 2015;135(3):691-698.  
26  
27  
28 62. Jartti T, Lehtinen Pasi, Timo V, et al. Evaluation of the efficacy of prednisolone in early  
29 wheezing induced by rhinovirus or respiratory syncytial virus. *Pediatr Infect Dis J*  
30 2006;25(6):482-488.  
31  
32  
33 63. Jartti T, Lehtinen P, Vanto T, et al. Efficacy of prednisolone in children hospitalized for  
34 recurrent wheezing. *Pediatr Allergy Immunol* 2007;18(4):326-334.  
35  
36  
37 64. Johnson DW, Jacobson S, Edney PC, et al. A comparison of nebulized budesonide,  
38 intramuscular dexamethasone, and placebo for moderately severe croup. *N Engl J Med*  
39 1998;339(8):498-503.  
40  
41  
42 65. Johnson DW, Schuh S, Koren G, et al. Outpatient treatment of croup with nebulized  
43 dexamethasone. *Arch Pediatr Adolesc Med* 1996;150(4):349-355.  
44  
45  
46 66. Klassen TP, Craig WR, Moher D, et al. Nebulized budesonide and oral dexamethasone for  
47 treatment of croup: A randomized controlled trial. *JAMA* 1998;279(20):1629-1632.  
48  
49  
50 67. Klassen TP, Feldman ME, Watters LK, et al. Nebulized budesonide for children with mild-  
51 to-moderate croup. *N Engl J Med* 1994;331(5):285-289.  
52  
53  
54  
55  
56  
57  
58  
59  
60

- 1  
2  
3 68. Klassen TP, Watters LK, Feldman ME, et al. The efficacy of nebulized budesonide in  
4 dexamethasone-treated outpatients with croup. *Pediatrics* 1996;97(4):463-466.  
5  
6  
7 69. Kuyucu S, Unal S, Kuyucu N, et al. Additive effects of dexamethasone in nebulized  
8 salbutamol or L-epinephrine treated infants with acute bronchiolitis. *Pediatr Int*  
9 2004;46(5):539-544.  
10  
11  
12 70. Lai ST, Hua YM, Lai YS, et al. Comparison of nebulized budesonide with intravenous  
13 dexamethasone in the treatment of young children hospitalized with acute asthma. *J Med*  
14 *Sci* 2005;25(5):223-228.  
15  
16  
17 71. Langton Hewer S, Hobbs J, Reid F, et al. Prednisolone in acute childhood asthma: Clinical  
18 responses to three dosages. *Respir Med* 1998;92(3):541-546.  
19  
20  
21 72. Lee KM, Lin YZ, Huang FY. Steroid-induced acute psychosis in a child with asthma: Report  
22 of one case. *Acta Paediatr Taiwan* 2001;42(3):169-171.  
23  
24  
25 73. Leer JA, Green JL, Heimlich EM, et al. A controlled, collaborative study in 297 infants and  
26 children. *Am J Dis Child* 1969;117(5):495-503.  
27  
28  
29 74. Lehmann S, Ott H. Glucocorticoid hypersensitivity as a rare but potentially fatal side effect  
30 of paediatric asthma treatment: A case report. *J Med Case Rep* 2008;2:186.  
31  
32  
33 75. Leipzig B, Oski FA, Cummings CW, et al. A prospective randomized study to determine the  
34 efficacy of steroids in treatment of croup. *J Pediatr* 1979;94(2):194-196.  
35  
36  
37 76. Lin YZ, Hsieh KH, Chen W, et al. Clinical trial of corticosteroid and beta-2 bronchodilator in  
38 acute wheezing infants. *Acta Paed Sin* 1991;32(6):333-340.  
39  
40  
41 77. Lucas-Bouwman ME, Roorda RJ, Jansman FGA, et al. Crushed prednisolone tablets or oral  
42 solution for acute asthma? *Arch Dis Child* 2001;84(4):347-348.  
43  
44  
45 78. Nahum A, Garty BZ, Marcus N, et al. Severe hypersensitivity reactions to corticosteroids in  
46 children. *Pediatr Emerg Care* 2009;25(5):339-341.  
47  
48  
49 79. Paniagua N, Munoz N, Lopez R, et al. Randomized trial of two doses of oral dexamethasone  
50 versus prednisone/prednisolone for children with acute asthma exacerbations in pediatric  
51 emergency department. *Eur J Pediatr* Conference: 6th Congress of the European  
52 Academy of Paediatric Societies Switzerland 2016;175(11):1480.  
53  
54  
55  
56  
57

- 1  
2  
3 80. Panickar J, Lakhanpaul M, Lambert PC, et al. Oral prednisolone for preschool children with  
4 acute virus-induced wheezing. *N Engl J Med* 2009;360(4):329-338.  
5  
6  
7 81. Panigada S, Sacco O, Girosi D, et al. Corticosteroids may favor proliferation of thoracic  
8 inflammatory myofibroblastic tumors. *Pediatr Pulmonol* 2014;49(3):E109-E111.  
9  
10  
11 82. Plint AC, Johnson DW, Patel H, et al; Pediatric Emergency Research Canada. Epinephrine  
12 and dexamethasone in children with bronchiolitis. *N Engl J Med* 2009;360(20):2079-  
13 2089.  
14  
15  
16 83. Razi CH, Akelma AZ, Harmanci K, et al. The addition of inhaled budesonide to standard  
17 therapy shortens the length of stay in hospital for asthmatic preschool children: A  
18 randomized, double-blind, placebo-controlled trial. *Int Arch Allergy Immunol*  
19 2015;166(4):297-303.  
20  
21  
22  
23 84. Roberts GW, Master VV, Staugas RE, et al. Repeated dose inhaled budesonide versus  
24 placebo in the treatment of croup. *J Paediatr Child Health* 1999;35(2):170-174.  
25  
26  
27 85. Roorda RJ, Walhof CM. Effects of inhaled fluticasone propionate administered with metered  
28 dose inhaler and spacer in mild to moderate croup: A negative preliminary report. *Pediatr*  
29 *Pulmonol* 1998;25(2):114-117.  
30  
31  
32 86. Roosevelt G, Sheehan K, Grupp-Phelan J, et al. Dexamethasone in bronchiolitis: A  
33 randomised controlled trial. *Lancet* 1996;348(9023):292-295.  
34  
35  
36 87. Sadowitz PD, Page NE, Crowley K. Adverse effects of steroid therapy in children with  
37 pharyngitis with unsuspected malignancy. *Pediatr Emerg Care* 2012;28(8):807-809.  
38  
39  
40 88. Saito M, Kikuchi Y, Kawarai Lefor A, et al. High-dose nebulized budesonide is effective for  
41 mild asthma exacerbations in children under 3 years of age. *Eur Ann Allergy Clin*  
42 *Immunol* 2017;49(1):22-27.  
43  
44  
45 89. Schuh S, Coates AL, Dick P, et al. A single versus multiple doses of dexamethasone in  
46 infants wheezing for the first time. *Pediatr Pulmonol* 2008;43(9):844-850.  
47  
48  
49 90. Schuh S, Willan AR, Stephens D, et al. Can montelukast shorten prednisolone therapy in  
50 children with mild to moderate acute asthma? A randomized controlled trial. *J Pediatr*  
51 2009;155(6):795-800.  
52  
53  
54  
55  
56  
57  
58  
59  
60

- 1  
2  
3 91. Siomou E, Challa A, Tzoufi M, et al. Biochemical markers of bone metabolism in infants and  
4 children under intravenous corticosteroid therapy. *Calcif Tissue Int* 2003;73(4):319-325.  
5  
6  
7 92. Sparrow A, Geelhoed G. Prednisolone versus dexamethasone in croup: A randomised  
8 equivalence trial. *Arch Dis Child* 2006;91(7):580-583.  
9  
10  
11 93. Stafford L, Hope ME, Janney EP, et al. Comparison of paediatric steroid mixtures.  
12 *Australian Journal of Hospital Pharmacy* 1998;28(4):246-249.  
13  
14  
15 94. Storr J, Barry BE, Barrell E, et al. Effect of a single oral dose of prednisolone in acute  
16 childhood asthma. *Lancet* 1987;1(8538):879-882.  
17  
18  
19 95. Sumboonnanonda A, Suwanjutha S, Sirinavin S. Randomized controlled trial of  
20 dexamethasone in infectious croup. *J Med Assoc Thai* 1997;80(4):262-265.  
21  
22  
23 96. Sung L, Osmond MH, Klassen TP. Randomized, controlled trial of inhaled budesonide as an  
24 adjunct to oral prednisone in acute asthma. *Acad Emerg Med* 1998;5(3):209-213.  
25  
26  
27 97. Super DM, Cartelli NA, Brooks LJ, et al. A prospective randomized double-blind study to  
28 evaluate the effect of dexamethasone in acute laryngotracheitis. *J Pediatr*  
29 1989;115(2):323-329.  
30  
31  
32 98. Sussman S, Grossman M, Magoffin R, et al. Dexamethasone (16 alpha methyl, 9 alpha  
33 fluoroprednisolone) in obstructive respiratory tract infections in children. *Pediatrics*  
34 1964;34(6):851-855.  
35  
36  
37 99. Svedmyr J, Nyberg E, Åsbrink-Nilsson E, et al. Intermittent treatment with inhaled steroids  
38 for deterioration of asthma due to upper respiratory tract infections. *Acta Paediatr*  
39 1995;84(8):884-888.  
40  
41  
42  
43 100. Svedmyr J, Nyberg E, Thunqvist P, et al. Prophylactic intermittent treatment with inhaled  
44 corticosteroids of asthma exacerbations due to airway infections in toddlers. *Acta*  
45 *Paediatr* 1999;88(1):42-47.  
46  
47  
48 101. Tagarro A, Pérez L, Quintero VM, et al. Dexamethasone does not reduce length of  
49 hospitalization or recurrent wheezing 1 year after early bronchiolitis. *Minerva Pediatr*  
50 2014;66(2):131-140.  
51  
52  
53 102. Tal A, Bavailski C, Yohai D, et al. Dexamethasone and salbutamol in the treatment of acute  
54 wheezing in infants. *Pediatrics* 1983;71(1):13-18.  
55  
56  
57

- 1  
2  
3  
4  
5 103. Tamura A, Matsubara K, Tanaka T, et al. Methylprednisolone pulse therapy for refractory  
6 mycoplasma pneumoniae pneumonia in children. *J Infect* 2008;57(3):223-228.  
7  
8  
9 104. Teeratakulpisarn J, Limwattananon C, Tanupattarachai S, et al. Efficacy of dexamethasone  
10 injection for acute bronchiolitis in hospitalized children: A randomized, double-blind,  
11 placebo-controlled trial. *Pediatr Pulmonol* 2007;42(5):433-439.  
12  
13  
14 105. van Woensel JBM, Wolfs TFW, van Aalderen WMC, et al. Randomised double blind  
15 placebo controlled trial of prednisolone in children admitted to hospital with respiratory  
16 syncytial virus bronchiolitis. *Thorax* 1997;52(7):634-637.  
17  
18  
19 106. Webb MSC, Henry RL, Milner AD. Oral corticosteroids for wheezing attacks under 18  
20 months. *Arch Dis Child* 1986;61(1):15-19.  
21  
22  
23 107. Zhang L, Ferruzzi E, Bonfanti T, et al. Long and short-term effect of prednisolone in  
24 hospitalized infants with acute bronchiolitis. *J Paediatr Child Health* 2003;39(7):548-  
25 551.  
26  
27  
28 108. Kelly HW, Van Natta ML, Covar RA, et al. Effect of long-term corticosteroid use on bone  
29 mineral density in children: A prospective longitudinal assessment in the childhood  
30 asthma management program (CAMP) study. *Pediatrics* 2008;122(1):e53-e61.  
31  
32  
33 109. Fuhlbrigge AL, Kelly HW. Inhaled corticosteroids in children: Effects on bone mineral  
34 density and growth. *Lancet Respir Med* 2014;2(6):487-496.  
35  
36  
37 110. Aljebab F, Choonara I, Conroy S. Systematic review of the toxicity of long-course oral  
38 corticosteroids in children. *PLoS ONE* 2017;12(1):e0170259.  
39  
40  
41 111. Vatti RR, Ali F, Teuber S, et al. Hypersensitivity reactions to corticosteroids. *Clinic Rev*  
42 *Allerg Immunol* 2014;47(1):26-37.  
43  
44  
45 112. Rieder M. Size and taste matters: Recent progress in the development of age-appropriate  
46 medicines for children. *Pharm Med* 2018;32(1):21-30.  
47  
48  
49 113. Beigelman A, Durrani S, Guilbert TW. Should a preschool child with acute episodic wheeze  
50 be treated with oral corticosteroids? A pro/con debate. *J Allergy Clin Immunol Pract*  
51 2016;4(1):27-35.  
52  
53  
54  
55  
56  
57  
58  
59  
60



- 1  
2  
3 114. Aljebab F, Choonara I, Conroy S. Systematic review of the toxicity of short-course oral  
4 corticosteroids in children. *Arch Dis Child* 2016;101(4):365-370.  
5  
6  
7 115. Waljee AK, Rogers MA, Lin P, et al. Short term use of oral corticosteroids and related  
8 harms among adults in the united states: Population based cohort study. *BMJ*  
9 2017;357;j1415.  
10  
11  
12 116. Hartling L, Ali S, Dryden DM, et al. How safe are common analgesics for the treatment of  
13 acute pain for children? A systematic review. *Pain Res Manag* 2016;5346819.  
14  
15  
16  
17  
18  
19  
20  
21  
22  
23  
24  
25  
26  
27  
28  
29  
30  
31  
32  
33  
34  
35  
36  
37  
38  
39  
40  
41  
42  
43  
44  
45  
46  
47  
48  
49  
50  
51  
52  
53  
54  
55  
56  
57  
58  
59  
60

For peer review only

**Table 5. Number of studies and participants reporting adverse events\***

| Organ system                       | AE - category               | AE – specific                           | No. of studies | No. of participants |
|------------------------------------|-----------------------------|-----------------------------------------|----------------|---------------------|
| <b>Infection &amp; Respiratory</b> | <b>Severe infections</b>    |                                         | <b>5</b>       | <b>1235</b>         |
|                                    | 1)                          | Sepsis                                  | 1              | 32                  |
|                                    | 2)                          | Superinfection                          | 2              | 354                 |
|                                    | 3)                          | UTI                                     | 1              | 720                 |
|                                    | 4)                          | Streptococcal infection                 | 1              | 129                 |
|                                    | <b>Systemic infections</b>  |                                         | <b>5</b>       | <b>1635</b>         |
|                                    | 1)                          | Fever                                   | 3              | 963                 |
|                                    | 2)                          | Common viral/bacterial/fungal infection | 2              | 792                 |
|                                    | 3)                          | Varicella                               | 3              | 1449                |
|                                    | <b>Lung/trachea</b>         |                                         | <b>10</b>      | <b>2053</b>         |
|                                    | 1)                          | Empyema                                 | 1              | 600                 |
| 2)                                 | Pneumonia                   | 8                                       | 2051           |                     |
| 3)                                 | Respiratory distress        | 2                                       | 2              |                     |
| <b>Upper respiratory tract</b>     |                             | <b>14</b>                               | <b>2457</b>    |                     |
| 1)                                 | Bacterial tracheitis        | 5                                       | 1023           |                     |
| 2)                                 | Sinusitis                   | 2                                       | 849            |                     |
| 3)                                 | Croup                       | 2                                       | 131            |                     |
| 4)                                 | Viral parotitis             | 1                                       | 27             |                     |
| 5)                                 | Pharyngitis                 | 1                                       | 129            |                     |
| 6)                                 | Persistent cough            | 1                                       | 27             |                     |
| 7)                                 | Oral thrush                 | 3                                       | 837            |                     |
| 8)                                 | Otitis media                | 4                                       | 1173           |                     |
| 9)                                 | Ear, nose, throat infection | 3                                       | 862            |                     |
| 10)                                | Nasal discharge             | 1                                       | 720            |                     |
| 11)                                | Eye discharge               | 1                                       | 720            |                     |
|                                    | <b>Voice complaints</b>     |                                         | <b>5</b>       | <b>794</b>          |
| <b>GI</b>                          | <b>GI bleeding</b>          |                                         | <b>8</b>       | <b>2669</b>         |
|                                    | 1)                          | Bleeding                                | 5              | 1577                |
|                                    | 2)                          | Gross hematochezia                      | 1              | 118                 |
|                                    | 3)                          | Occult blood in stools                  | 2              | 292                 |
|                                    | 4)                          | Dark stools                             | 1              | 800                 |
|                                    | <b>Vomiting</b>             |                                         | <b>27</b>      | <b>6067</b>         |
|                                    | 1)                          | Vomiting                                | 24             | 5983                |
|                                    | 2)                          | Nausea                                  | 6              | 586                 |
|                                    | 3)                          | Palatability                            | 3              | 170                 |
|                                    | <b>Abdominal pain</b>       |                                         | <b>5</b>       | <b>1332</b>         |
|                                    | <b>Diarrhea</b>             |                                         | <b>8</b>       | <b>1346</b>         |
|                                    | 1)                          | Diarrhea                                | 7              | 1217                |
|                                    | 2)                          | Gastroenteritis                         | 1              | 129                 |
| <b>CNS &amp; Behaviour</b>         | <b>Tremor/jitteriness</b>   |                                         | <b>8</b>       | <b>1274</b>         |
|                                    | 1)                          | Tremor                                  | 7              | 1226                |
|                                    | 2)                          | Jittery                                 | 1              | 48                  |
|                                    | <b>Behaviour change</b>     |                                         | <b>14</b>      | <b>2078</b>         |
|                                    | 1)                          | Violent behaviour                       | 1              | 198                 |
|                                    | 2)                          | Mood change                             | 7              | 1430                |
|                                    | 3)                          | Hyperactivity                           | 2              | 268                 |

|                                                  |                                            |                                          |           |             |
|--------------------------------------------------|--------------------------------------------|------------------------------------------|-----------|-------------|
|                                                  | 4)                                         | Restlessness                             | 3         | 297         |
|                                                  | 5)                                         | New sleep problems                       | 3         | 408         |
|                                                  | 6)                                         | Emotional distress due to nebulizer mask | 1         | 82          |
|                                                  | 7)                                         | Psychosis                                | 1         | 1           |
|                                                  | <b>Headache</b>                            |                                          | <b>3</b>  | <b>291</b>  |
| <b>Dermatological</b>                            | <b>Burn</b>                                |                                          | <b>1</b>  | <b>198</b>  |
|                                                  | <b>Integument</b>                          |                                          | <b>10</b> | <b>1954</b> |
|                                                  | 1)                                         | Hives                                    | 2         | 199         |
|                                                  | 2)                                         | Rash                                     | 8         | 1954        |
|                                                  | 3)                                         | Eczema                                   | 1         | 129         |
|                                                  | 4)                                         | Eye irritation                           | 2         | 211         |
|                                                  | 5)                                         | Tongue irritation                        | 1         | 82          |
|                                                  | 6)                                         | Positive wheal                           | 1         | 1           |
|                                                  | 7)                                         | Bleeding from ear                        | 1         | 720         |
|                                                  | <b>Phlebitis</b>                           |                                          | <b>1</b>  | <b>32</b>   |
| <b>Endocrine/Metabolic &amp; Musculoskeletal</b> | <b>Fluid and electrolyte abnormalities</b> |                                          | <b>7</b>  | <b>1849</b> |
|                                                  | 1)                                         | Hyperkalemia                             | 1         | 800         |
|                                                  | 2)                                         | Hyperglycemia                            | 3         | 154         |
|                                                  | 3)                                         | Glycosuria                               | 1         | 125         |
|                                                  | 4)                                         | Sodium retention                         | 1         | 50          |
|                                                  | 5)                                         | Dehydration                              | 1         | 720         |
|                                                  | <b>Growth</b>                              |                                          | <b>6</b>  | <b>731</b>  |
|                                                  | <b>Adrenal suppression</b>                 |                                          | <b>5</b>  | <b>249</b>  |
|                                                  | <b>Bone health</b>                         |                                          | <b>5</b>  | <b>579</b>  |
| <b>Cardiovascular</b>                            | <b>Arrhythmia</b>                          |                                          | <b>3</b>  | <b>312</b>  |
|                                                  | 1)                                         | Tachycardia                              | 2         | 178         |
|                                                  | 2)                                         | Palpitations                             | 1         | 134         |
|                                                  | <b>Hypertension</b>                        |                                          | <b>5</b>  | <b>1491</b> |
|                                                  | <b>Congestive heart failure</b>            |                                          | <b>1</b>  | <b>50</b>   |
| <b>General</b>                                   | <b>General complaints</b>                  |                                          | <b>5</b>  | <b>1146</b> |
|                                                  | 1)                                         | Dizziness                                | 1         | 87          |
|                                                  | 2)                                         | Pallor                                   | 2         | 869         |
|                                                  | 3)                                         | Excessive urination                      | 1         | 134         |
|                                                  | 4)                                         | Normal tooth eruption                    | 1         | 56          |
|                                                  | <b>Hematology, gum bleeding</b>            |                                          | <b>1</b>  | <b>1</b>    |
| <b>Immune System &amp; Oncology</b>              | <b>Immunosuppression</b>                   |                                          | <b>4</b>  | <b>147</b>  |
|                                                  | 1)                                         | Immunosuppression                        | 3         | 146         |
|                                                  | 2)                                         | Tumor cell proliferation                 | 1         | 1           |

AE: adverse event; CNS: central nervous system; GI: gastro-intestinal; no.: number; URT: upper respiratory tract  
 \* Each adverse event was clustered into its related organ system; a panel of clinicians ranked each AE category and its corresponding adverse events in order of clinical significance/severity. The organ systems are presented in order of frequency of reporting, beginning with the most frequently reported (i.e., Infection & respiratory).

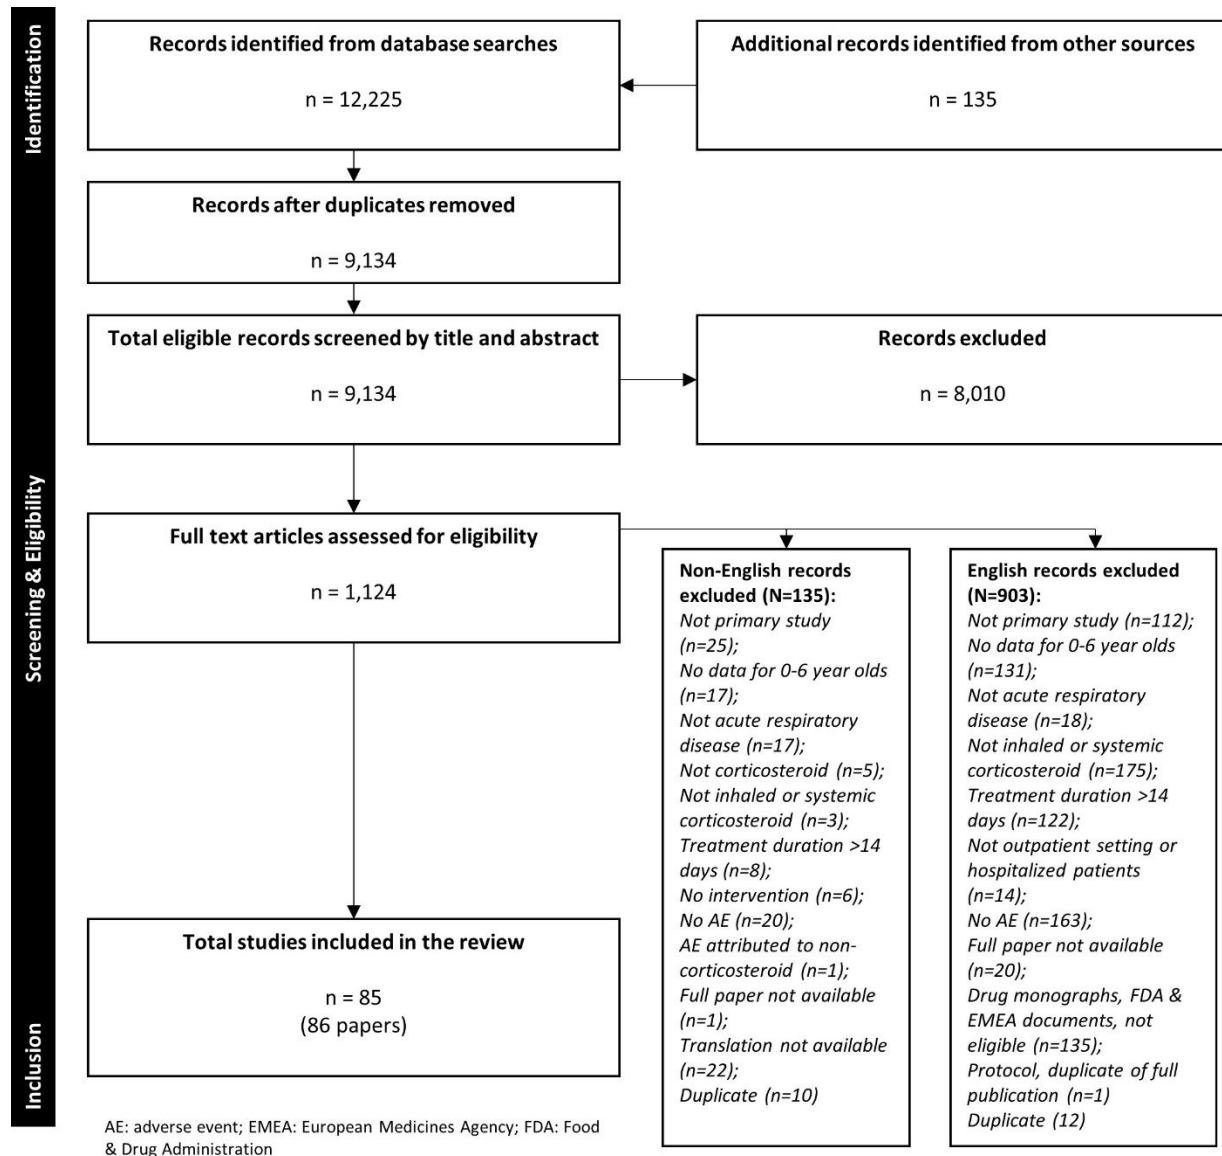

Figure 1. PRISMA study flow selection

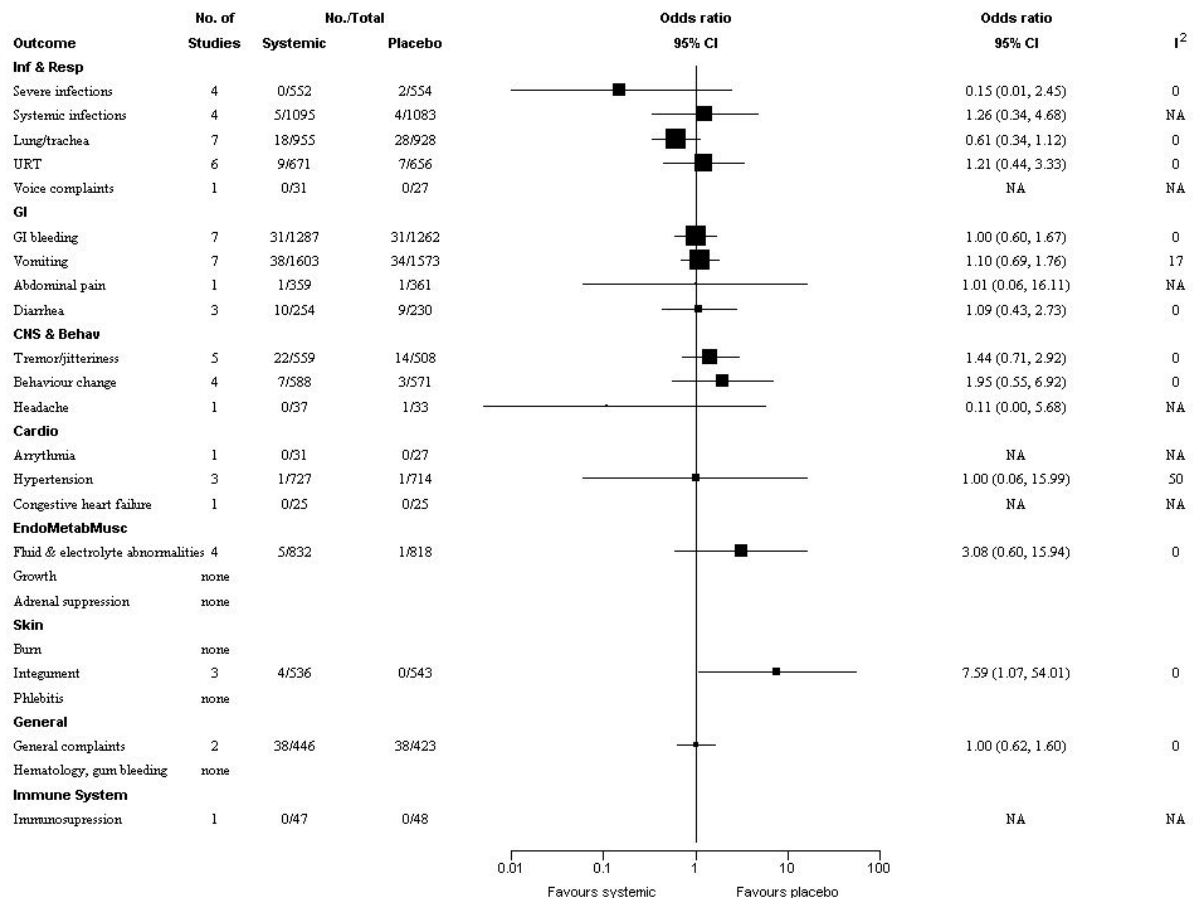

Figure 2. Forest plot of adverse events – systemic versus placebo

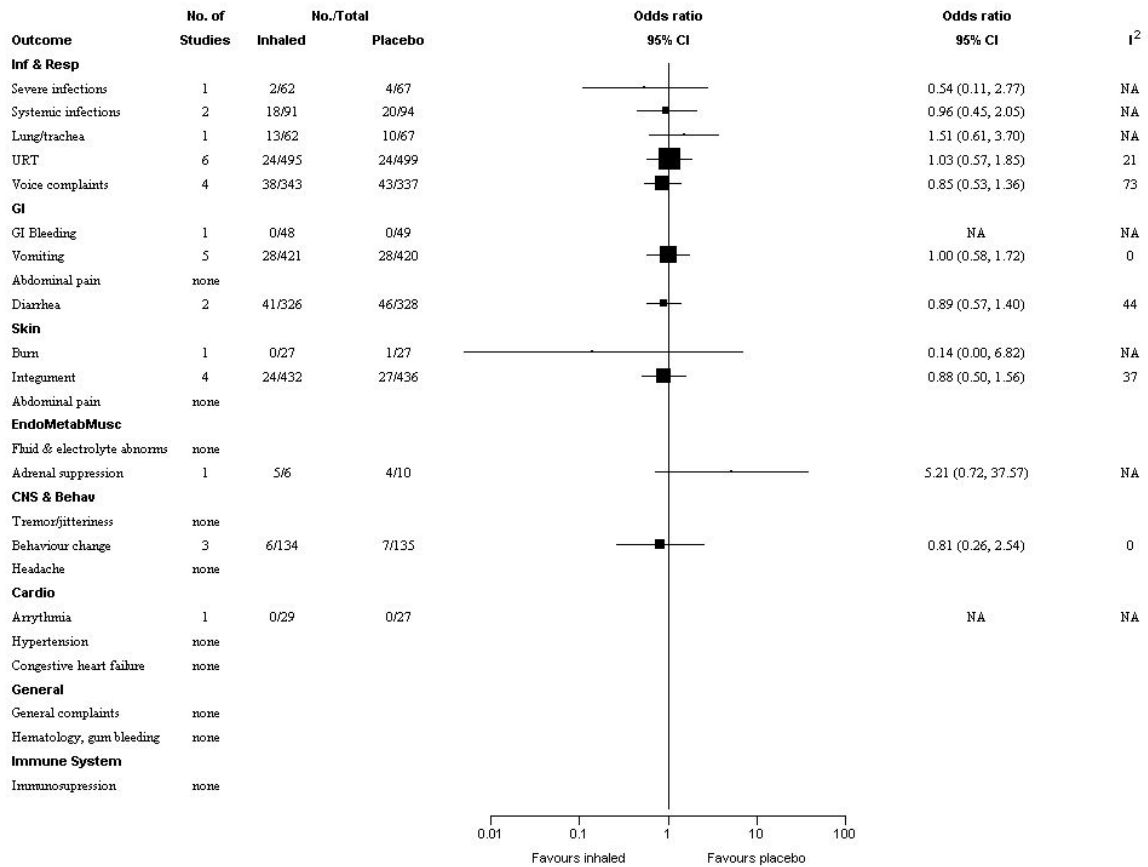

Figure 3. Forest plot of adverse events – inhaled versus placebo

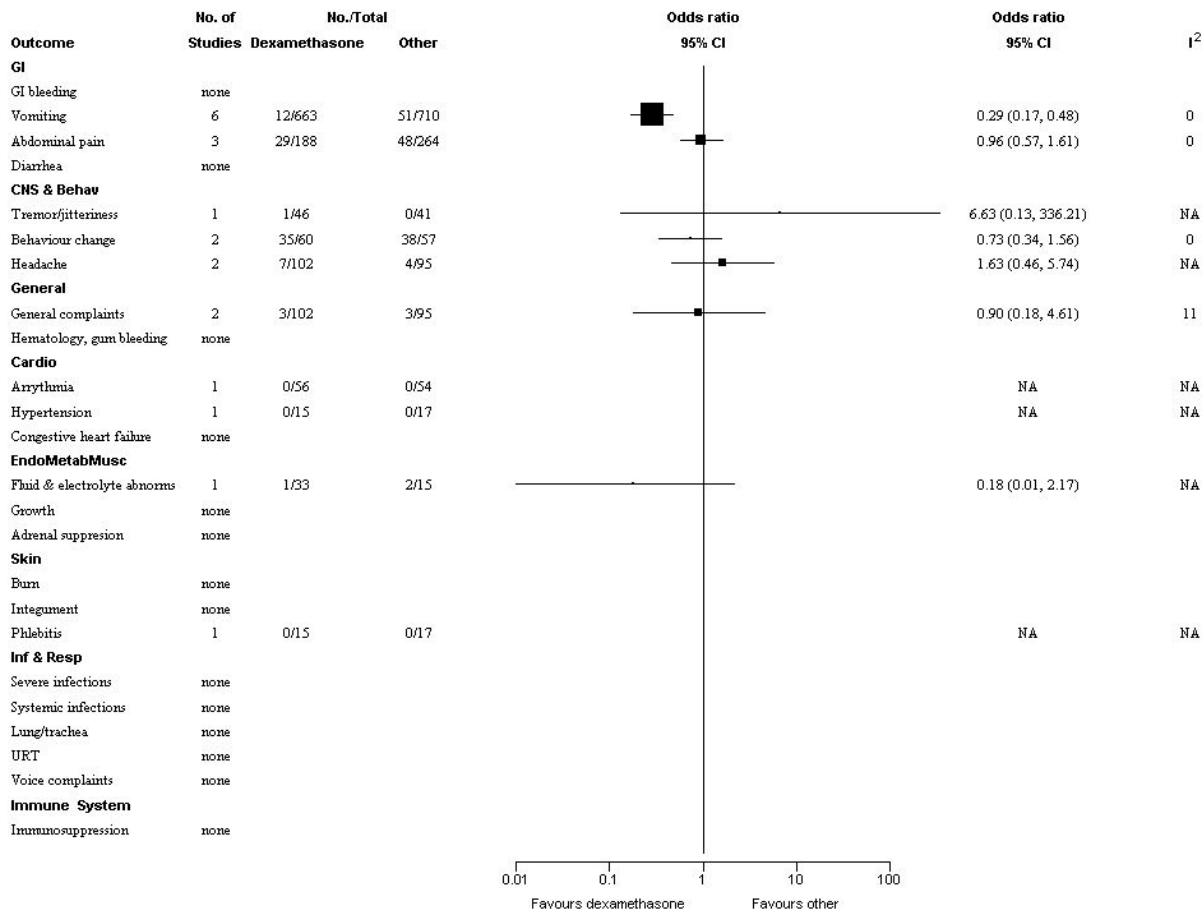

Figure 4. Forest plot of adverse events – dexamethasone versus other

### Supplement 1. Search strategy

**Database for original search:** Ovid Medline(R) 1946 to September Week 1 2014

**Databases for update searches:** Ovid MEDLINE(R) Epub Ahead of Print, In-Process & Other Non-Indexed Citations, Ovid MEDLINE(R) Daily and Ovid MEDLINE(R) 1946 to Present

**Date original search conducted:** 14 September 2014

**Date first update search conducted:** 24 February 2016

**Date second update search conducted:** 31 July 2017

#### Strategy:

1. Adrenal Cortex Hormones/
2. Anti-Inflammatory Agents/
3. Beclomethasone/
4. Budesonide/
5. exp Glucocorticoids/
6. exp Hydroxycorticosteroids/
7. Pregnenediones/
8. Triamcinolone Acetonide/
9. adrenal cortex hormone\*.tw,nm.
10. advair\*.tw,nm.
11. alvesco\*.tw,nm.
12. azmacort\*.tw,nm.
13. becl?met\*.tw,nm.
14. beclazone\*.tw,nm.
15. beclo?ort\*.tw,nm.
16. beclovent\*.tw,nm.
17. beconase\*.tw,nm.
18. becotide\*.tw,nm.
19. betamet?asone\*.tw,nm.
20. betnesol\*.tw,nm.
21. budesonide\*.tw,nm.
22. ciclesonide\*.tw,nm.
23. clobetasol\*.tw,nm.
24. cortiso\*.tw,nm.
25. cortodoxone\*.tw,nm.
26. corticosteroid\*.tw,nm.
27. decadron\*.tw,nm.
28. depo medrone\*.tw,nm.
29. desoximet?asone\*.tw,nm.
30. dexamethasone\*.tw,nm.
31. deflazacort\*.tw,nm.
32. diflucortolone\*.tw,nm.
33. flixotide\*.tw,nm.
34. flumethasone\*.tw,nm.



- 1
- 2
- 3 35. flunisolide\*.tw,nm.
- 4 36. fluocino\*.tw,nm.
- 5 37. fluocortolone\*.tw,nm.
- 6 38. fluorometholone\*.tw,nm.
- 7 39. flurandrenolone\*.tw,nm.
- 8 40. fluticasone\*.tw,nm.
- 9 41. glucocortico\*.tw,nm.
- 10 42. hydrocortisone\*.tw,nm.
- 11 43. hydroxycorticostero\*.tw,nm.
- 12 44. hydrocortone\*.tw,nm.
- 13 45. hydroxypregnenolone\*.tw,nm.
- 14 46. kenacort\*.tw,nm.
- 15 47. kenalog\*.tw,nm.
- 16 48. medrone\*.tw,nm.
- 17 49. methylprednisolone\*.tw,nm.
- 18 50. mometasone furoate\*.tw,nm.
- 19 51. nasonex\*.tw,nm.
- 20 52. paramethasone\*.tw,nm.
- 21 53. predniso\*.tw,nm.
- 22 54. pregnenolone\*.tw,nm.
- 23 55. pulmicort\*.tw,nm.
- 24 56. qvar\*.tw,nm.
- 25 57. rhinocort\*.tw,nm.
- 26 58. seretide\*.tw,nm.
- 27 59. solu cortef\*.tw,nm.
- 28 60. symbicort\*.tw,nm.
- 29 61. tetrahydrocortisol\*.tw,nm.
- 30 62. triamcinolone\*.tw,nm.
- 31 63. tricort\*.tw,nm.
- 32 64. vanceril\*.tw,nm.
- 33 65. or/1-64
- 34 66. Acute Disease/ and (asthma\* or pneumonia\* or wheez\*).mp.
- 35 67. exp Asthma/ and (acute\* or emergenc\* or exacerbation\* or severe\*).mp.
- 36 68. Bronchial Hyperreactivity/
- 37 69. Bronchial Spasm/
- 38 70. exp Bronchiolitis/
- 39 71. Croup/
- 40 72. exp Dyspnea/
- 41 73. Emergencies/ and (asthma\* or pneumonia\* or wheez\*).mp.
- 42 74. Emergency Medical Services/ and (asthma\* or pneumonia\* or wheez\*).mp.
- 43 75. Emergency Services, Hospital/ and (asthma\* or pneumonia\* or wheez\*).mp.
- 44 76. exp Pharyngitis/
- 45 77. exp Pneumonia/ and (acute\* or emergenc\* or exacerbation\* or severe\*).mp.
- 46 78. exp Respiratory Syncytial Viruses/
- 47
- 48
- 49
- 50
- 51
- 52
- 53
- 54
- 55
- 56
- 57
- 58
- 59
- 60

- 1
- 2
- 3 79. exp Respiratory Syncytial Virus Infections/
- 4 80. Rhinitis/
- 5 81. exp Sinusitis/
- 6 82. Status Asthmaticus/
- 7 83. Respiratory Sounds/ and (acute\* or emergenc\* or exacerbation\* or severe\*).mp.
- 8 84. ((acute\* or emergenc\* or exacerbation\* or severe\*) adj5 (asthma\* or pneumonia\* or wheez\*)).tw.
- 9 85. (breath\* adj2 (difficult\* or gasp\* or hard\* or labo?r\* or shallow\* or short\*)).tw.
- 10 86. (bronch\* adj3 (constrict\* or spas\*)).tw.
- 11 87. bronchiolitis\*.tw.
- 12 88. bronchoconstrict\*.tw.
- 13 89. bronchospasm\*.tw.
- 14 90. croup\*.tw.
- 15 91. dyspne\*.tw.
- 16 92. (lung\* adj2 (disease\* or infect\*)).tw.
- 17 93. ((nasopharynx or nasopharynx or para nasal or paranasal or sinus\*) adj3 (infect\* or inflam\*)).tw.
- 18 94. (nasosinusit\* or rhinosinusit\*).tw.
- 19 95. pharyngitis\*.tw.
- 20 96. (respiratory adj2 (attack\* or infect\* or inflam\* or virus\*)).tw.
- 21 97. rhinit\*.tw.
- 22 98. sinusit\*.tw.
- 23 99. tonsillitis\*.tw.
- 24 100. or/66-99
- 25 101. exp child/
- 26 102. exp infant/
- 27 103. exp Pediatrics/
- 28 104. (baby\* or babies or child\* or infant\* or infancy or neonat\* or newborn\*).mp.
- 29 105. (boy\* or girl\* or paediatric\* or peadiatric\* or pediatric\* or prepubescen\*).mp.
- 30 106. or/101-105
- 31 107. and/65,100,106 [steroids/respiratory illness/children]
- 32 108. randomized controlled trial.pt.
- 33 109. controlled clinical trial.pt.
- 34 110. randomi?ed.ab.
- 35 111. placebo.ab.
- 36 112. drug therapy.fs.
- 37 113. randomly.ab.
- 38 114. trial.ab.
- 39 115. groups.ab.
- 40 116. or/108-115
- 41 117. exp Case control studies/
- 42 118. case reports.pt.
- 43 119. Cross-sectional studies/
- 44 120. exp Cohort Studies/
- 45 121. Epidemiologic studies/
- 46 122. case control.tw.
- 47
- 48
- 49
- 50
- 51
- 52
- 53
- 54
- 55
- 56
- 57
- 58
- 59
- 60

123. (case adj (report\* or study or studies or series)).tw.
124. cohort analy\*.tw.
125. (cohort adj (study or studies)).tw.
126. cross sectional.tw.
127. (follow up adj (study or studies)).tw.
128. longitudinal.tw.
129. (observational adj (study or studies)).tw.
130. retrospective.tw.
131. or/117-130
132. 116 or 131
133. exp animals/ not humans.sh.
134. 132 not 133
135. 107 and 134
136. (comment or editorial or letter or meta analysis or review).pt.
137. 135 not 136
138. remove duplicates from 137

**Database for original search:** Ovid Medline(R) In-Process & Other Non-Indexed Citations, September 12, 2014

**Date original search conducted:** 14 September 2014

**Strategy:**

1. adrenal cortex hormone\*.tw,nm.
2. advair\*.tw,nm.
3. alvesco\*.tw,nm.
4. azmacort\*.tw,nm.
5. becl?met\*.tw,nm.
6. beclazone\*.tw,nm.
7. beclo?ort\*.tw,nm.
8. beclovent\*.tw,nm.
9. beconase\*.tw,nm.
10. becotide\*.tw,nm.
11. betamet?asone\*.tw,nm.
12. betnesol\*.tw,nm.
13. budesonide\*.tw,nm.
14. ciclesonide\*.tw,nm.
15. clobetasol\*.tw,nm.
16. cortiso\*.tw,nm.
17. cortodoxone\*.tw,nm.
18. corticosteroid\*.tw,nm.
19. decadron\*.tw,nm.
20. depo medrone\*.tw,nm.
21. desoximet?asone\*.tw,nm.
22. dexamethasone\*.tw,nm.

23. deflazacort\*.tw,nm.
24. diflucortolone\*.tw,nm.
25. flixotide\*.tw,nm.
26. flumethasone\*.tw,nm.
27. flunisolide\*.tw,nm.
28. fluocino\*.tw,nm.
29. fluocortolone\*.tw,nm.
30. fluorometholone\*.tw,nm.
31. flurandrenolone\*.tw,nm.
32. fluticasone\*.tw,nm.
33. glucocortico\*.tw,nm.
34. hydrocortisone\*.tw,nm.
35. hydroxycorticostero\*.tw,nm.
36. hydrocortone\*.tw,nm.
37. hydroxypregnenolone\*.tw,nm.
38. kenacort\*.tw,nm.
39. kenalog\*.tw,nm.
40. medrone\*.tw,nm.
41. methylprednisolone\*.tw,nm.
42. mometasone furoate\*.tw,nm.
43. nasonex\*.tw,nm.
44. paramethasone\*.tw,nm.
45. predniso\*.tw,nm.
46. pregnenolone\*.tw,nm.
47. pulmicort\*.tw,nm.
48. qvar\*.tw,nm.
49. rhinocort\*.tw,nm.
50. seretide\*.tw,nm.
51. solu cortef\*.tw,nm.
52. symbicort\*.tw,nm.
53. tetrahydrocortisol\*.tw,nm.
54. triamcinolone\*.tw,nm.
55. tricort\*.tw,nm.
56. vanceril\*.tw,nm.
57. or/1-56
58. ((acute\* or emergenc\* or exacerbation\* or severe\*) adj5 (asthma\* or pneumonia\* or wheez\*)).tw.
59. (breath\* adj2 (difficult\* or gasp\* or hard\* or labo?r\* or shallow\* or short\*)).tw.
60. (bronch\* adj3 (constrict\* or spas\*)).tw.
61. bronchiolitis\*.tw.
62. bronchoconstrict\*.tw.
63. bronchospasm\*.tw.
64. croup\*.tw.
65. dyspne\*.tw.
66. (lung\* adj2 (disease\* or infect\*)).tw.

- 1
- 2
- 3 67. ((naso pharynx or nasopharynx or para nasal or paranasal or sinus\*) adj3 (infect\* or inflam\*)).tw.
- 4 68. (nasosinusit\* or rhinosinusit\*).tw.
- 5 69. pharyngitis\*.tw.
- 6 70. (respiratory adj2 (attack\* or infect\* or inflam\* or virus\*)).tw.
- 7 71. rhinit\*.tw.
- 8 72. sinusit\*.tw.
- 9 73. tonsillitis\*.tw.
- 10 74. or/58-73
- 11 75. (baby\* or babies or child\* or infant\* or infancy or neonat\* or newborn\*).tw.
- 12 76. (boy\* or girl\* or paediatric\* or peadiatric\* or pediatric\* or prepubescen\*).tw.
- 13 77. or/75,76
- 14 78. and/57,74,77
- 15 79. randomi?ed.tw.
- 16 80. placebo.tw.
- 17 81. randomly.tw.
- 18 82. trial.tw.
- 19 83. groups.tw.
- 20 84. or/79-83
- 21 85. case control.tw.
- 22 86. (case adj (report\* or study or studies or series)).tw.
- 23 87. cohort analy\*.tw.
- 24 88. (cohort adj (study or studies)).tw.
- 25 89. cross sectional.tw.
- 26 90. (follow up adj (study or studies)).tw.
- 27 91. longitudinal.tw.
- 28 92. (observational adj (study or studies)).tw.
- 29 93. retrospective.tw.
- 30 94. or/85-93
- 31 95. 84 or 94
- 32 96. 78 and 95
- 33 97. (comment\* or editorial\* or letter\*).mp.
- 34 98. 96 not 97
- 35 99. remove duplicates from 98
- 36
- 37
- 38
- 39
- 40
- 41
- 42
- 43

44 **Database:** Cochrane Central Register of Controlled Trials (CENTRAL) via Wiley Cochrane Library

45 **Date original search conducted:** 14 September 2014

46 **Date first update search conducted:** 24 February 2016

47 **Date second update search conducted:** 31 July 2017

48 **Strategy:**

- 49
- 50
- 51 1. [mh ^ "Adrenal Cortex Hormones"]
- 52 2. [mh ^ "Anti-Inflammatory Agents"]
- 53 3. [mh ^ Beclomethasone]
- 54 4. [mh ^ Budesonide]
- 55
- 56
- 57
- 58
- 59
- 60

- 1
- 2
- 3 5. [mh Glucocorticoids]
- 4 6. [mh Hydroxycorticosteroids]
- 5 7. [mh ^ Pregnenediones]
- 6 8. [mh ^ "Triamcinolone Acetonide"]
- 7 9. "adrenal cortex" next hormone\*:ti,ab,kw
- 8 10. advair\*:ti,ab,kw
- 9 11. alvesco\*:ti,ab,kw
- 10 12. azmacort\*:ti,ab,kw
- 11 13. becl?met\*:ti,ab,kw
- 12 14. beclazone\*:ti,ab,kw
- 13 15. beclo?ort\*:ti,ab,kw
- 14 16. beclovent\*:ti,ab,kw
- 15 17. beconase\*:ti,ab,kw
- 16 18. becotide\*:ti,ab,kw
- 17 19. betamet?asone\*:ti,ab,kw
- 18 20. betnesol\*:ti,ab,kw
- 19 21. budesonide\*:ti,ab,kw
- 20 22. ciclesonide\*:ti,ab,kw
- 21 23. clobetasol\*:ti,ab,kw
- 22 24. cortiso\*:ti,ab,kw
- 23 25. cortodoxone\*:ti,ab,kw
- 24 26. corticosteroid\*:ti,ab,kw
- 25 27. decadron\*:ti,ab,kw
- 26 28. depo next medrone\*:ti,ab,kw
- 27 29. desoximet?asone\*:ti,ab,kw
- 28 30. dexamethasone\*:ti,ab,kw
- 29 31. deflazacort\*:ti,ab,kw
- 30 32. diflucortolone\*:ti,ab,kw
- 31 33. flixotide\*:ti,ab,kw
- 32 34. flumethasone\*:ti,ab,kw
- 33 35. flunisolide\*:ti,ab,kw
- 34 36. fluocino\*:ti,ab,kw
- 35 37. fluocortolone\*:ti,ab,kw
- 36 38. fluorometholone\*:ti,ab,kw
- 37 39. flurandrenolone\*:ti,ab,kw
- 38 40. fluticasone\*:ti,ab,kw
- 39 41. glucocortico\*:ti,ab,kw
- 40 42. hydrocortisone\*:ti,ab,kw
- 41 43. hydroxycorticostero\*:ti,ab,kw
- 42 44. hydrocortone\*:ti,ab,kw
- 43 45. hydroxypregnenolone\*:ti,ab,kw
- 44 46. kenacort\*:ti,ab,kw
- 45 47. kenalog\*:ti,ab,kw
- 46 48. medrone\*:ti,ab,kw
- 47
- 48
- 49
- 50
- 51
- 52
- 53
- 54
- 55
- 56
- 57
- 58
- 59
- 60

- 1
- 2
- 3
- 4 49. methylprednisolone\*:ti,ab,kw
- 5 50. mometasone next furoate\*:ti,ab,kw
- 6 51. nasonex\*:ti,ab,kw
- 7 52. paramethasone\*:ti,ab,kw
- 8 53. predniso\*:ti,ab,kw
- 9 54. pregnenolone\*:ti,ab,kw
- 10 55. pulmicort\*:ti,ab,kw
- 11 56. qvar\*:ti,ab,kw
- 12 57. rhinocort\*:ti,ab,kw
- 13 58. seretide\*:ti,ab,kw
- 14 59. solu next cortef\*:ti,ab,kw
- 15 60. symbicort\*:ti,ab,kw
- 16 61. tetrahydrocortisol\*:ti,ab,kw
- 17 62. triamcinolone\*:ti,ab,kw
- 18 63. tricort\*:ti,ab,kw
- 19 64. vanceril\*:ti,ab,kw
- 20 65. {OR #1-#64}
- 21 66. [mh ^ "Acute Disease"] and (asthma\* or pneumonia\* or wheez\*)
- 22 67. [mh Asthma] and (acute\* or emergenc\* or exacerbation\* or severe\*)
- 23 68. [mh "Bronchial Hyperreactivity"]
- 24 69. [mh "Bronchial Spasm"]
- 25 70. [mh Bronchiolitis]
- 26 71. [mh ^ Croup]
- 27 72. [mh Dyspnea]
- 28 73. [mh ^ Emergencies] and (asthma\* or pneumonia\* or wheez\*)
- 29 74. [mh ^ "Emergency Medical Services"] and (asthma\* or pneumonia\* or wheez\*)
- 30 75. [mh ^ "Emergency Services, Hospital"] and (asthma\* or pneumonia\* or wheez\*)
- 31 76. [mh Pharyngitis]
- 32 77. [mh Pneumonia] and (acute\* or emergenc\* or exacerbation\* or severe\*)
- 33 78. [mh "Respiratory Syncytial Viruses"]
- 34 79. [mh "Respiratory Syncytial Virus Infections"]
- 35 80. [mh Rhinitis]
- 36 81. [mh Sinusitis]
- 37 82. [mh ^ "Status Asthmaticus"]
- 38 83. [mh ^ "Respiratory Sounds"] and (acute\* or emergenc\* or exacerbation\* or severe\*)
- 39 84. ((acute\* or emergenc\* or exacerbation\* or severe\*) near/5 (asthma\* or pneumonia\* or wheez\*)):ti,ab,kw
- 40 85. (breath\* near/2 (difficult\* or gasp\* or hard\* or labo?r\* or shallow\* or short\*)):ti,ab,kw
- 41 86. (bronch\* near/3 (constrict\* or spas\*)):ti,ab,kw
- 42 87. bronchiolitis\*:ti,ab,kw
- 43 88. bronchoconstrict\*:ti,ab,kw
- 44 89. bronchospasm\*:ti,ab,kw
- 45 90. croup\*:ti,ab,kw
- 46 91. dyspne\*:ti,ab,kw
- 47
- 48
- 49
- 50
- 51
- 52
- 53
- 54
- 55
- 56
- 57
- 58
- 59
- 60

92. (lung\* near/2 (disease\* or infect\*)):ti,ab,kw
93. (("nasopharynx" or nasopharynx\* or "paranasal" or paranasal\* or sinus\*) near/3 (infect\* or inflam\*)):ti,ab,kw
94. (nasosinusit\* or rhinosinusit\*):ti,ab,kw
95. pharyngitis\*:ti,ab,kw
96. (respiratory\* near/2 (attack\* or infect\* or inflam\* or virus\*)):ti,ab,kw
97. rhinit\*:ti,ab,kw
98. sinusit\*:ti,ab,kw
99. tonsillitis\*:ti,ab,kw
100. {or #66-#99}
101. [mh child]
102. [mh infant]
103. [mh Pediatrics]
104. (baby\* or babies or child\* or infant\* or infancy or neonat\* or newborn\*):ti,ab,kw
105. (boy\* or girl\* or paediatric\* or peadiatric\* or pediatric\* or prepubescen\*):ti,ab,kw
106. {or #101-#105}
107. #65 and #100 and #106
108. #65 and #100 and #106 in Trials

**Database:** Ovid Embase 1974 to 2014 September 12

**Date original search conducted:** 14 September 2014

**Strategy:**

1. antiinflammatory agent/
2. beclometasone/
3. budesonide/
4. corticosteroid/
5. exp glucocorticoid/
6. hydroxycorticosteroid/
7. pregnane derivitative/
8. triamcinolone acetonide/
9. adrenal cortex hormone\*.tw,tn.
10. advair\*.tw,tn.
11. alvesco\*.tw,tn.
12. azmacort\*.tw,tn.
13. becl?met\*.tw,tn.
14. beclazone\*.tw,tn.
15. beclo?ort\*.tw,tn.
16. beclovent\*.tw,tn.
17. beconase\*.tw,tn.
18. becotide\*.tw,tn.
19. betamet?asone\*.tw,tn.
20. betnesol\*.tw,tn.
21. budesonide\*.tw,tn.



- 1
- 2
- 3 22. ciclesonide\*.tw,tn.
- 4 23. clobetasol\*.tw,tn.
- 5 24. cortiso\*.tw,tn.
- 6 25. cortodoxone\*.tw,tn.
- 7 26. corticosteroid\*.tw,tn.
- 8 27. decadron\*.tw,tn.
- 9 28. depo medrone\*.tw,tn.
- 10 29. desoximet?asone\*.tw,tn.
- 11 30. dexamethasone\*.tw,tn.
- 12 31. deflazacort\*.tw,tn.
- 13 32. diflucortolone\*.tw,tn.
- 14 33. flixotide\*.tw,tn.
- 15 34. flumethasone\*.tw,tn.
- 16 35. flunisolide\*.tw,tn.
- 17 36. fluocino\*.tw,tn.
- 18 37. fluocortolone\*.tw,tn.
- 19 38. fluorometholone\*.tw,tn.
- 20 39. flurandrenolone\*.tw,tn.
- 21 40. fluticasone\*.tw,tn.
- 22 41. glucocortico\*.tw,tn.
- 23 42. hydrocortisone\*.tw,tn.
- 24 43. hydroxycorticostero\*.tw,tn.
- 25 44. hydrocortone\*.tw,tn.
- 26 45. hydroxypregnenolone\*.tw,tn.
- 27 46. kenacort\*.tw,tn.
- 28 47. kenalog\*.tw,tn.
- 29 48. medrone\*.tw,tn.
- 30 49. methylprednisolone\*.tw,tn.
- 31 50. mometasone furoate\*.tw,tn.
- 32 51. nasonex\*.tw,tn.
- 33 52. paramethasone\*.tw,tn.
- 34 53. predniso\*.tw,tn.
- 35 54. pregnenolone\*.tw,tn.
- 36 55. pulmicort\*.tw,tn.
- 37 56. qvar\*.tw,tn.
- 38 57. rhinocort\*.tw,tn.
- 39 58. seretide\*.tw,tn.
- 40 59. solu cortef\*.tw,tn.
- 41 60. symbicort\*.tw,tn.
- 42 61. tetrahydrocortisol\*.tw,tn.
- 43 62. triamcinolone\*.tw,tn.
- 44 63. tricort\*.tw,tn.
- 45 64. vanceril\*.tw,tn.
- 46 65. or/1-64
- 47
- 48
- 49
- 50
- 51
- 52
- 53
- 54
- 55
- 56
- 57
- 58
- 59
- 60

- 1
- 2
- 3
- 4 66. acute disease/ and (asthma\* or pneumonia\* or wheez\*).mp.
- 5 67. exp asthma/ and (acute\* or emergenc\* or exacerbation\* or severe\*).mp.
- 6 68. exp breathing disorder/ and (acute\* or emergenc\* or exacerbation\* or severe\*).mp.
- 7 69. bronchospasm/
- 8 70. bronchus hyperreactivity/
- 9 71. exp bronchiolitis/
- 10 72. croup/
- 11 73. exp dyspnea/
- 12 74. emergency/ and (asthma\* or pneumonia\* or wheez\*).mp.
- 13 75. emergency health service/ and (asthma\* or pneumonia\* or wheez\*).mp.
- 14 76. exp emergency treatment/ and (asthma\* or pneumonia\* or wheez\*).mp.
- 15 77. emergency ward/ and (asthma\* or pneumonia\* or wheez\*).mp.
- 16 78. exp pharyngitis/
- 17 79. exp pneumonia/ and (acute\* or emergenc\* or exacerbation\* or severe\*).mp.
- 18 80. Respiratory syncytial pneumovirus/
- 19 81. respiratory syncytial virus infection/
- 20 82. exp rhinitis/
- 21 83. exp sinusitis/
- 22 84. ((acute\* or emergenc\* or exacerbation\* or severe\*) adj5 (asthma\* or pneumonia\* or wheez\*)).tw.
- 23 85. (breath\* adj2 (difficult\* or gasp\* or hard\* or labo?r\* or shallow\* or short\*)).tw.
- 24 86. (bronch\* adj3 (constrict\* or spas\*)).tw.
- 25 87. bronchiolitis\*.tw.
- 26 88. bronchoconstrict\*.tw.
- 27 89. bronchospasm\*.tw.
- 28 90. croup\*.tw.
- 29 91. dyspne\*.tw.
- 30 92. (lung\* adj2 (disease\* or infect\*)).tw.
- 31 93. ((naso pharynx or nasopharynx or para nasal or paranasal or sinus\*) adj3 (infect\* or inflam\*)).tw.
- 32 94. (nasosinusit\* or rhinosinusit\*).tw.
- 33 95. pharyngitis\*.tw.
- 34 96. (respiratory adj2 (attack\* or infect\* or inflam\* or virus\*)).tw.
- 35 97. rhinit\*.tw.
- 36 98. sinusit\*.tw.
- 37 99. tonsillitis\*.tw.
- 38 100. or/66-99
- 39 101. exp child/
- 40 102. exp infant/
- 41 103. exp Pediatrics/
- 42 104. (baby\* or babies or child\* or infant\* or infancy or neonat\* or newborn\*).mp.
- 43 105. (boy\* or girl\* or paediatric\* or peadiatric\* or pediatric\* or prepubescen\*).mp.
- 44 106. or/101-105
- 45 107. and/65,100,106
- 46 108. crossover procedure/
- 47 109. double blind procedure/
- 48
- 49
- 50
- 51
- 52
- 53
- 54
- 55
- 56
- 57
- 58
- 59
- 60

110. randomized controlled trial/
110. single blind procedure/
111. allocat\*.tw.
112. assign\*.tw.
113. cross over\*.tw.
114. crossover\*.tw.
115. doubl\* adj blind\*.tw.
116. factorial\*.tw.
117. placebo\*.tw.
118. random\*.tw.
119. singl\* adj blind\*.tw.
120. volunteer\*.tw.
121. or/108-120
122. exp case control study/
123. case report/
124. case study/
125. cross-sectional study/
126. cohort analysis/
127. case control.tw.
128. (case adj (report\* or study or studies or series)).tw.
129. cohort analy\*.tw.
130. (cohort adj (study or studies)).tw.
131. cross sectional.tw.
132. (follow up adj (study or studies)).tw.
133. longitudinal.tw.
134. (observational adj (study or studies)).tw.
135. retrospective.tw.
136. or/122-135
137. 121 or 136
138. animals/ not (animals/ and humans/)
139. 137 not 138
140. 107 and 139
141. (editorial or journal editorial or journal letter or journal note or letter or review).pt.
142. 140 not 141
143. limit 142 to embase

**Database:** Drugs@FDA

**URL:** <http://www.accessdata.fda.gov/scripts/cder/drugsatfda/index.cfm>

**Date original search conducted:** 5 September 2014

**Strategy:**

Searched Drugs@FDA for drug name keywords:

1. beclametasone dipropionate
2. budesonide

3. ciclesonide
4. fluticasone propionate
5. mometasone furoate
6. triamcinolone acetonide

Retrieved all available medical and statistical reviews for drugs in these classes with systemic routes of administration

**Database:** Health Canada Drug Products Database

**URL:** <http://www.hc-sc.gc.ca/dhp-mps/prodpharma/databasdon/index-eng.php>

**Date original search conducted:** 8 September 2014

**Strategy:**

Searched Health Canada Drug Products Database for drug name keywords:

1. beclomethasone
2. budesonide
3. ciclesonide
4. fluticasone propionate
5. mometasone furoate
6. triamcinolone acetonide

Retrieved all available monographs for drugs in these classes with systemic routes of administration

**Database:** European Medicines Agency's European Public Assessment Reports

**URL:**

[http://www.ema.europa.eu/ema/index.jsp?curl=pages/medicines/landing/epar\\_search.jsp&mid=WC0b01ac058001d124](http://www.ema.europa.eu/ema/index.jsp?curl=pages/medicines/landing/epar_search.jsp&mid=WC0b01ac058001d124)

**Date original search conducted:** 9, 10 September 2014

**Strategy:**

Searched EMA reports for drug name keywords:

1. beclomethasone
2. beclometasone
3. beclamethasone
4. beclometasone
5. budesonide
6. ciclesonide
7. fluticasone
8. mometasone
9. triamcinolone acetonide
10. Also searched for "corticosteroids" as a pharmaco therapeutic group

Retrieved all available reports for drugs in these classes with systemic routes of administration

## Supplement 2. Eligibility criteria for study inclusion

### INCLUSION/EXCLUSION FORM

---

**Reviewer ID:** \_\_\_\_\_ **Date:**    /    /2015    **Record ID:** \_\_\_\_\_

---

| Criteria | Yes | No | UC |
|----------|-----|----|----|
|----------|-----|----|----|

#### 1. PUBLICATION TYPE

a. Primary research (RCTs, cohort studies, case control studies, case reports, and case series)

Exclude:

- Systematic reviews, letters to editor, commentaries

#### 2. Population

a. Children  $\leq 6$  years of age, where age subgroups data is available:

Unclear:

- If aggregate/subgroup data include but are not limited to age  $\leq 6$  years

Exclude:

- If data is reported in aggregate with older ages

#### 3. CONDITION

a. Children with acute respiratory disease (any of the following):

- Bronchiolitis
- Croup
- Acute wheeze/asthma
- Acute uncomplicated pneumonia (no abscess, effusion, etc)
- Pharyngitis/tonsillitis
- Peritonsillar abscess
- Acute sinusitis
- Respiratory syncytial virus/ rhinovirus/other viruses
- Respiratory distress due to foreign bodies
- PFAPA syndrome

Exclude:

- patients in NICU, PICU
- respiratory distress syndrome (newborn)
- allergic rhinitis
- animal studies

#### 4. Intervention

a. All inhaled\* and systemic (IV, IM, oral) corticosteroids used for  $\leq 14$  days per course, including (but not limited to):

  

- Beclomethasone
- Budesonide
- Ciclesonide
- Dexamethasone
- Fluticasone propionate
- Mometasone furoate
- Prednisolone
- Prednisone
- Triamcinolone acetonide
- combination therapies (e.g. ICS + short-acting beta-agonists)

Exclude

- topical (non-systemic) corticosteroid therapy

\* inhaled (moderate- to high-dose) corticosteroids, following GINA guidelines for low doses for children 5 years and younger (see Box 6-6 below).

### 5. Comparator group (where relevant)

a. Any comparison, including non-pharmacologic interventions which may act similarly to a placebo

  

### 6. OUTCOME

Adverse drug reaction, side effect, adverse effects/events, adverse reactions

  

### 7. Setting

Focus is on outpatient settings (e.g. ambulatory, ED), and hospitalised patients

  

Exclude

- patients in NICU, PICU

Comments:

GINA Global Strategy for Asthma Management and Prevention:

[http://www.ginasthma.org/local/uploads/files/GINA\\_Report\\_2014\\_Jun11.pdf](http://www.ginasthma.org/local/uploads/files/GINA_Report_2014_Jun11.pdf)

#### Box 6-6. Low daily doses of inhaled corticosteroids for children 5 years and younger

| Drug                              | Low daily dose (mcg) |
|-----------------------------------|----------------------|
| Beclomethasone dipropionate (HFA) | 100                  |
| Budesonide pMDI + spacer          | 200                  |

1  
2  
3  
4  
5  
6  
7  
8  
9  
10  
11  
12  
13  
14  
15  
16  
17  
18  
19  
20  
21  
22  
23  
24  
25  
26  
27  
28  
29  
30  
31  
32  
33  
34  
35  
36  
37  
38  
39  
40  
41  
42  
43  
44  
45  
46  
47  
48  
49  
50  
51  
52  
53  
54  
55  
56  
57  
58  
59  
60

|                               |                               |
|-------------------------------|-------------------------------|
| Budesonide nebulized          | 500                           |
| Fluticasone proprionate (HFA) | 100                           |
| Ciclesonide                   | 160                           |
| Mometasone furoate            | Not studied below age 4 years |
| Triamcinolone acetonide       | Not studied in this age group |

For peer review only

**Supplement 3 Characteristics of included studies**

- a. Summary characteristics of included studies p. 1-2
- b. Summary characteristics of included studies - comparisons p. 3
- c. Characteristics of included studies p. 4-76

**Supplement 3a. Summary characteristics of included studies**

| <b>Study characteristic</b>                                                     | <b>N (%<sup>1</sup>)</b> |
|---------------------------------------------------------------------------------|--------------------------|
| <b>Country</b>                                                                  |                          |
| Canada                                                                          | 15 (18)                  |
| US                                                                              | 15 (18)                  |
| Australia                                                                       | 7 (8)                    |
| UK                                                                              | 5 (6)                    |
| Denmark                                                                         | 4 (5)                    |
| Finland                                                                         | 4 (5)                    |
| Italy, Netherlands, Taiwan, Thailand                                            | 3, each (14)             |
| China, Greece, Ireland, Israel, Japan, Saudi Arabia (SA), Spain, Sweden, Turkey | 2, each (21)             |
| Brazil, Germany, Mexico, Qatar                                                  | 1, each (5)              |
| SA & UK                                                                         | 1 (1)                    |
| <b>Study designs</b>                                                            |                          |
| RCT (all)                                                                       | 68 (80)                  |
| 2-arm                                                                           | 52 (61)                  |
| 3-arm                                                                           | 7 (8)                    |
| 4-arm non-factorial                                                             | 1 (1)                    |
| factorial 4 x4                                                                  | 4 (5)                    |
| crossover                                                                       | 2 (2)                    |
| trial registry                                                                  | 1 (1)                    |
| conference abstract                                                             | 1 (1)                    |
| Non-RCT                                                                         | 5 (6)                    |
| Cohort                                                                          | 4 (5)                    |
| Case control                                                                    | 1 (1)                    |
| Case series                                                                     | 4 (5)                    |
| Case report                                                                     | 3 (4)                    |
| <b>Number of centres</b>                                                        |                          |
| Single centre                                                                   | 56 (66)                  |
| Multi-centre                                                                    | 24 (28)                  |
| Unclear/NR                                                                      | 5 (6)                    |
| <b>Setting</b>                                                                  |                          |
| Inpatient                                                                       | 41 (48)                  |
| Outpatient                                                                      | 22 (26)                  |
| Inpatient & outpatient                                                          | 21 (25)                  |
| NR                                                                              | 1 (1)                    |



|                                                 |                         |
|-------------------------------------------------|-------------------------|
| <b>Funding</b>                                  |                         |
| Not reported                                    | 35 (41)                 |
| Non-industry                                    | 25 (29)                 |
| Industry                                        | 9 (11)                  |
| Industry & non-industry                         | 15 (18)                 |
| No direct funding                               | 1 (1)                   |
| <b>Year of publication, median (range)</b>      | <b>2002 (1964-2017)</b> |
| <b>Respiratory condition</b>                    |                         |
| Asthma                                          | 27 (32)                 |
| Croup                                           | 22 (26)                 |
| Bronchiolitis                                   | 15 (18)                 |
| Wheeze                                          | 14 (16)                 |
| Asthma/croup, palatability & tolerability of CS | 2 (2)                   |
| Pharyngitis                                     | 1 (1)                   |
| Shortness of breath                             | 1 (1)                   |
| Refractory pneumonia                            | 1 (1)                   |
| Bronchiolitis & laryngitis                      | 1 (1)                   |
| Bronchiolitis, viral wheeze & croup             | 1 (1)                   |

CS: corticosteroid; N: number of studies; NR: not reported; RCT: randomized controlled trial; SA: Saudi Arabia; UK: United Kingdom; US: United States

<sup>1</sup>sum of percentages may not total 100 due to rounding

## Supplement 3b. Summary characteristics of included studies – comparisons

| Number of treatment groups            | Comparison                                                                                          | No. of studies<br>(no. of patients) | No. of studies<br>contributing<br>data<br>(no. of patients) |
|---------------------------------------|-----------------------------------------------------------------------------------------------------|-------------------------------------|-------------------------------------------------------------|
| 2-arms                                | Systemic CS vs. placebo/no intervention/standard care                                               | 26 (4166)                           | 15 (1425)                                                   |
|                                       | Systemic CS vs. systemic CS                                                                         | 12 (1683)                           | 5 (1051)                                                    |
|                                       | Systemic CS vs. non-CS                                                                              | 2 (180)                             | 0                                                           |
|                                       | Systemic CS vs. inhaled CS                                                                          | 3 (124)                             | 1 (18)                                                      |
|                                       | Systemic CS vs. systemic CS + placebo                                                               | 1 (125)                             | 0                                                           |
|                                       | Inhaled CS vs. placebo/no intervention                                                              | 14 (2367)                           | 8 (1234)                                                    |
|                                       | Inhaled CS vs. non-CS                                                                               | 1 (66)                              | 0                                                           |
| 3-arms                                | Systemic CS vs. systemic CS vs. no intervention                                                     | 2 (180)                             | 1 (80)                                                      |
|                                       | Systemic CS vs. systemic CS vs. systemic CS                                                         | 5 (624)                             | 2 (99)                                                      |
|                                       | Systemic CS vs. inhaled CS vs. non-CS/placebo                                                       | 2 (208)                             | 2 (183)                                                     |
|                                       | Systemic CS vs. inhaled CS vs. combined (systemic + inhaled)                                        | 1 (198)                             | 1 (197)                                                     |
|                                       | Systemic CS + non-CS vs. inhaled CS + sal + non-CS vs. inhaled CS + sal                             | 1 (238)                             | 0                                                           |
| 4-arms                                | Inhaled CS vs. inhaled CS vs. no CS                                                                 | 1 (80)                              | 1 (80)                                                      |
|                                       | Systemic CS vs. inhaled CS vs. non-CS vs. placebo                                                   | 1 (114)                             | 1 (114)                                                     |
|                                       | Systemic CS + sal dose1 vs. systemic CS + sal dose2 vs. sal dose1 + placebo vs. sal dose2 + placebo | 1 (70)                              | 1 (70)                                                      |
|                                       | Systemic CS + non-CS vs. systemic CS + sal vs. non-CS + placebo vs. sal + placebo                   | 1 (69)                              | 1 (69)                                                      |
|                                       | Systemic CS + non-CS vs. systemic CS + placebo vs. non-CS + placebo vs. placebo + placebo           | 1 (800)                             | 1 (800)                                                     |
| Non-comparative (case reports/series) | Systemic CS                                                                                         | 5 (5)                               | 0                                                           |
|                                       | Mode of administration NR                                                                           | 2 (3)                               | 0                                                           |

CS: corticosteroid; no.: number; NR: not reported; sal: salbutamol; vs.: versus

## Supplement 3c. Characteristics of included studies

| Author, year<br>Country<br>Funding source            | Study design<br>Setting<br>No. of centres    | Respiratory condition<br>Age (range)      | Comparators, no. of participants                                                                                                         | Co-interventions; Maintenance CS                                    | Time points for assessments; FU                                                                                         | Outcomes related to adverse events                                                                                                                                                                                    |
|------------------------------------------------------|----------------------------------------------|-------------------------------------------|------------------------------------------------------------------------------------------------------------------------------------------|---------------------------------------------------------------------|-------------------------------------------------------------------------------------------------------------------------|-----------------------------------------------------------------------------------------------------------------------------------------------------------------------------------------------------------------------|
| Alangari 2014<br>Saudi Arabia<br>Non-industry funded | RCT<br>ED<br>1                               | Asthma<br>2-12y                           | 1) Budesonide 500mcg/dose, 3 doses 20min apart (neb), n=458<br>2) Placebo saline, 3 doses 20min apart (neb), n=448                       | Salbutamol, ipratropium & prednisolone<br><br>No CS in preceding 7d | Baseline, at 1h, 2h, 3h and 4h from the start of medication s;<br>FU 72h post-discharge                                 | The most frequently reported adverse effects were fine tremors (17 cases) and palpitations (11 cases). None of the reported adverse effects was serious, and none was significantly different between the two groups. |
| Alansari 2013<br>Qatar<br>Non-industry funded        | RCT<br>Pediatric emergency unit<br>1         | Bronchiolitis<br><=18mo                   | 1) Dexamethasone 1.0mg first day, then 0.6mg for 4d (oral) + sal, 5d total (neb), n=102<br>2) Placebo (oral) + sal, 5d total (neb), n=98 | Epinephrine, oxygen & hydration<br><br>No CS in preceding 48h       | At study entry, then assessed if ready for discharge at 12h, 18h, 24h, 36h & 48h;<br>FU by telephone 1wk post-discharge | Daily telephone surveillance (7 days) revealed no particular side effect concerns in either treatment group.                                                                                                          |
| Aljebab 2017<br>Saudi Arabia & UK<br>Unfunded        | Cohort,<br>3-arm<br>Pediatric ED of hospital | Asthma/croup, palatability & tolerability | SA<br>1) Dexamethasone 0.5mg/5mL elixir (oral), n=33                                                                                     | NR<br><br>Most patients in prednisolone groups had                  | After each dose (within 10min) & daily on D1-D5                                                                         | In SA and the UK, dexamethasone had the highest palatability                                                                                                                                                          |

|  |                |                           |                                                                                                                                                                                                                                                                                                                              |                                                                                                                                                                       |                                                                                                                                                                                                                                                                                                                                                                                                                                                                  |
|--|----------------|---------------------------|------------------------------------------------------------------------------------------------------------------------------------------------------------------------------------------------------------------------------------------------------------------------------------------------------------------------------|-----------------------------------------------------------------------------------------------------------------------------------------------------------------------|------------------------------------------------------------------------------------------------------------------------------------------------------------------------------------------------------------------------------------------------------------------------------------------------------------------------------------------------------------------------------------------------------------------------------------------------------------------|
|  | (SA & UK)<br>2 | 2-10y (SA);<br>2-16y (UK) | <p>2) Prednisolone base 5.0mg tablets (oral), n=52</p> <p>3) Prednisolone sodium phosphate 15.0mg/mL syrup (oral), n=37</p> <p>UK</p> <p>1) Dexamethasone 2.0mg/5mL elixir (oral), n=53</p> <p>2) Prednisolone base 5.0mg tablet (oral), n=38</p> <p>3) Prednisolone sodium phosphate 5.0mg soluble tablets (oral), n=42</p> | <p>received oral steroids previously; however, most patients and none had received oral steroids previously in the SA &amp; UK dexamethasone groups, respectively</p> | <p>scores and prednisolone base tablets had the lowest. Palatability scores improved for all formulations of prednisolone with each subsequent daily dose. In SA, prednisolone base tablets were associated with more nausea (24 vs. 7 patients) and vomiting (5 vs. 0 patients) than sodium phosphate syrup. In the UK, vomiting occurred more frequently with prednisolone base (8 patients) than sodium phosphate soluble tablets (2 patients) (p=0.041).</p> |
|--|----------------|---------------------------|------------------------------------------------------------------------------------------------------------------------------------------------------------------------------------------------------------------------------------------------------------------------------------------------------------------------------|-----------------------------------------------------------------------------------------------------------------------------------------------------------------------|------------------------------------------------------------------------------------------------------------------------------------------------------------------------------------------------------------------------------------------------------------------------------------------------------------------------------------------------------------------------------------------------------------------------------------------------------------------|

|                                      |                                            |              |                                                                                                             |                                                                                       |                                                                                                          |                                                                                                                                                                                                                                                            |
|--------------------------------------|--------------------------------------------|--------------|-------------------------------------------------------------------------------------------------------------|---------------------------------------------------------------------------------------|----------------------------------------------------------------------------------------------------------|------------------------------------------------------------------------------------------------------------------------------------------------------------------------------------------------------------------------------------------------------------|
|                                      |                                            |              |                                                                                                             |                                                                                       |                                                                                                          | In both centres, dexamethasone was associated with less side effects. Vomiting (1 vs. 0 patients), nausea (7 vs. 3 patients), and abdominal pain (10 vs. 8 patients) occurred more with dexamethasone sodium phosphate solution than dexamethasone elixir. |
| Alshehr 2005 Saudi Arabia Funding NR | RCT Emergency rooms & outpatient clinics 3 | Croup 3mo-9y | 1) Dexamethasone 0.6mg/kg, single dose (oral), n=36<br>2) Dexamethasone 0.15mg/kg, single dose (oral), n=36 | Mist therapy, racemic epinephrine, oxygen & antibiotics<br><br>No CS in preceding 4wk | 12h & 24h after treatment & change in total croup scores per 12h intervals within & between study groups | Two patients developed bronchopneumonia on second day of admission as confirmed by chest x-ray and one patient had bacterial tracheitis. All these three patients were in group A (0.6 mg/kg dexamethasone). No adverse events were                        |

|                                                           |                                   |                            |                                                                                                                                |                                          |                                                         |                                                                                                                                                                                                                                                                                                |
|-----------------------------------------------------------|-----------------------------------|----------------------------|--------------------------------------------------------------------------------------------------------------------------------|------------------------------------------|---------------------------------------------------------|------------------------------------------------------------------------------------------------------------------------------------------------------------------------------------------------------------------------------------------------------------------------------------------------|
|                                                           |                                   |                            |                                                                                                                                |                                          |                                                         | noted in the group B patients. No patient had a clinical deterioration, either in the emergency room or after discharge and no child had gastrointestinal bleeding or bacterial infection.                                                                                                     |
| Altamimi 2006<br>Canada<br>Non-industry & industry funded | RCT<br>Pediatric<br>hospital<br>1 | Asthma<br>2-16y            | 1) Dexamethasone 0.6mg/kg (max 18mg), single dose (oral), n=67<br>2) Prednisolone 1.0mg/kg (max 30mg) twice daily (oral), n=67 | Salbutamol<br><br>No CS in preceding 2wk | 2d & 5d post-discharge & every week to a maximum of 3wk | Two subjects in the prednisolone group dropped out because of repeated vomiting. Side effects (table 5), n:<br>Abdominal pain (2 dex vs. 3 pred);<br>Vomiting (0 dex vs. 1 pred);<br>Headache (0 dex vs. 0 pred);<br>Palpitation (0 dex vs. 0 pred);<br>Excessive urination (0 dex vs. 1 pred) |
| Bacharier 2008<br>USA                                     | RCT, 3-arm                        | At least 2 wheeze episodes | 1) Montelukast 4.0mg once daily (oral) +                                                                                       | Albuterol, prednisolone & other non-     | Clinic visits 4wk after randomizati                     | The 3 groups did not differ significantly in                                                                                                                                                                                                                                                   |

|                                                                                                                                                                                                                                                                 |                                     |                             |                                                                                                                                                                                                                                       |                                                                              |                                                                                                                                                                                                                             |                                                                                                                                                                                                                                                 |
|-----------------------------------------------------------------------------------------------------------------------------------------------------------------------------------------------------------------------------------------------------------------|-------------------------------------|-----------------------------|---------------------------------------------------------------------------------------------------------------------------------------------------------------------------------------------------------------------------------------|------------------------------------------------------------------------------|-----------------------------------------------------------------------------------------------------------------------------------------------------------------------------------------------------------------------------|-------------------------------------------------------------------------------------------------------------------------------------------------------------------------------------------------------------------------------------------------|
| <p>1<br/>2<br/>3<br/>4<br/>5<br/>6<br/>7<br/>8<br/>9<br/>10<br/>11<br/>12<br/>13<br/>14<br/>15<br/>16<br/>17<br/>18<br/>19<br/>20<br/>21<br/>22<br/>23<br/>24<br/>25<br/>26<br/>27<br/>28<br/>29<br/>30</p> <p>Non-industry &amp; industry funded</p>           | <p>Clinical center 5</p>            | <p>in last year 12-59mo</p> | <p>placebo ICS twice daily for 7d (neb), n=95<br/>2) Budesonide 1.0mg twice daily (neb) + placebo LTRA once daily (neb), n=96<br/>3) conventional therapy + placebo (systemic + inhaled), n=47<br/><br/>Multiple courses over 1yr</p> | <p>asthma medications<br/><br/>No more than 6 courses of CS in past year</p> | <p>on, then every 8wk; FU by phone 2wk after randomization, followed by calls 4wk after each scheduled clinic visit<br/><br/>Linear growth in height or length (assessment method NR) from baseline to study end (12mo)</p> | <p>several other outcomes assessed over the 1-year trial, including oral corticosteroid use, health care use, linear growth, quality of life, and frequencies of adverse events.</p>                                                            |
| <p>31<br/>32<br/>33<br/>34<br/>35<br/>36<br/>37<br/>38<br/>39<br/>40<br/>41<br/>42<br/>43<br/>44<br/>45<br/>46<br/>47<br/>48<br/>49<br/>50<br/>51<br/>52<br/>53<br/>54<br/>55<br/>56<br/>57</p> <p>Bisgaard 2006 Denmark Non-industry &amp; industry funded</p> | <p>RCT Clinical research unit 1</p> | <p>Wheeze 1mo</p>           | <p>1) Budesonide 400mcg/day for 2wk (MDI), n=149<br/>2) Placebo once daily for 2wk (MDI), n=145<br/><br/>Multiple courses over 3yrs</p>                                                                                               | <p>NR<br/>NR</p>                                                             | <p>Height &amp; bone mineral density measured using Harpenden stadiometry at 3yrs of age</p>                                                                                                                                | <p>Safety, as evaluated by height and bone mineral density, were not affected by treatment; the height at three years of age measured by stadiometry and bone mineral density measured by ultrasonography at the phalanx were unaffected by</p> |

|                                                           |                          |                                |                                                                                                                                          |                                                                                                             |                                                                                                                                                           |                                                                                                                                                                                                                                                                                                                                                                                                                                                                                                                                                                                                                    |
|-----------------------------------------------------------|--------------------------|--------------------------------|------------------------------------------------------------------------------------------------------------------------------------------|-------------------------------------------------------------------------------------------------------------|-----------------------------------------------------------------------------------------------------------------------------------------------------------|--------------------------------------------------------------------------------------------------------------------------------------------------------------------------------------------------------------------------------------------------------------------------------------------------------------------------------------------------------------------------------------------------------------------------------------------------------------------------------------------------------------------------------------------------------------------------------------------------------------------|
|                                                           |                          |                                |                                                                                                                                          |                                                                                                             |                                                                                                                                                           | treatment group.                                                                                                                                                                                                                                                                                                                                                                                                                                                                                                                                                                                                   |
| Bjornson 2004<br>Canada<br>Non-industry & industry funded | RCT<br>Pediatric ED<br>4 | Croup<br>mean<br>35+/-23<br>mo | 1)<br>Dexamethasone<br>0.6mg, max.<br>20.0mg, single<br>dose (oral),<br>n=359<br>2) Placebo<br>solution, single<br>dose (oral),<br>n=361 | Mist,<br>antibiotics &<br>nebulized<br>epinephrine<br>or beta-<br>agonists<br><br>No CS in<br>preceding 2wk | D1, D2, D3,<br>D7 & D21<br>after day of<br>treatment;<br>FU<br>interview<br>with parent<br>on D7 and<br>chart and<br>administrative<br>database<br>review | Among the<br>720 patients,<br>there were no<br>cases of<br>gastrointestinal<br>bleeding,<br>complicated<br>varicella, or<br>bacterial<br>tracheitis.<br>There were 7<br>cases of<br>pneumonia (3<br>in the<br>dexamethasone<br>group). All<br>these cases<br>were<br>managed on<br>an outpatient<br>basis, without<br>significant<br>sequelae.<br>Repeated<br>short courses<br>of oral<br>corticosteroids<br>are not<br>associated<br>with long-<br>term negative<br>effects on<br>bone<br>metabolism,<br>bone density<br>or adrenal<br>function.<br>There were<br>no serious<br>adverse<br>events<br>attributable |



|  |  |  |  |  |  |                                                                                                                                                                                                                                                                                                                                                                                                                                                                                                                                                                                                                                              |
|--|--|--|--|--|--|----------------------------------------------------------------------------------------------------------------------------------------------------------------------------------------------------------------------------------------------------------------------------------------------------------------------------------------------------------------------------------------------------------------------------------------------------------------------------------------------------------------------------------------------------------------------------------------------------------------------------------------------|
|  |  |  |  |  |  | <p>to therapy in any children in our study. However, the study was not sufficiently powered to exclude the possibility of rare adverse events.</p> <p>Supplementary Table 1 list of adverse events, n (dex vs. placebo):</p> <p>Abnormal bowel movements (6 vs. 5);</p> <p>Fever (5 vs. 4);</p> <p>Pneumonia (3 vs. 4);</p> <p>Vomiting or gastroenteritis (3 vs. 4);</p> <p>Otitis media (1 vs. 5);</p> <p>Bronchitis (3 vs. 1);</p> <p>Sore throat (1 vs. 2);</p> <p>Streptococcal throat infection (1 vs. 1);</p> <p>Abdominal pain (1 vs. 1);</p> <p>Rash (2 vs. 0);</p> <p>Dehydration (1 vs. 0);</p> <p>Febrile seizure (1 vs. 0);</p> |
|--|--|--|--|--|--|----------------------------------------------------------------------------------------------------------------------------------------------------------------------------------------------------------------------------------------------------------------------------------------------------------------------------------------------------------------------------------------------------------------------------------------------------------------------------------------------------------------------------------------------------------------------------------------------------------------------------------------------|

|                                          |                       |               |                                                                                                                                                                                                                                                                                                                                                  |                |                                                                                                                                                                                                                                                                                                   |                                                                                                                                                                                                                                                                                                 |
|------------------------------------------|-----------------------|---------------|--------------------------------------------------------------------------------------------------------------------------------------------------------------------------------------------------------------------------------------------------------------------------------------------------------------------------------------------------|----------------|---------------------------------------------------------------------------------------------------------------------------------------------------------------------------------------------------------------------------------------------------------------------------------------------------|-------------------------------------------------------------------------------------------------------------------------------------------------------------------------------------------------------------------------------------------------------------------------------------------------|
|                                          |                       |               |                                                                                                                                                                                                                                                                                                                                                  |                |                                                                                                                                                                                                                                                                                                   | RSV infection (1 vs. 0);<br>Uncomplicated varicella (0 vs. 1);<br>Urinary tract infection (0 vs. 1);<br>Irritability (1 vs. 1);<br>Eye discharge (1 vs. 0);<br>Sinusitis (0 vs. 1);<br>Bleeding from ear (0 vs. 1);<br>Nasal discharge (1 vs. 0)                                                |
| Brunette<br>1988<br>Canada<br>Funding NR | NRCT<br>Hospital<br>1 | Asthma<br><6y | 1) Theophylline<br>8.0mg/kg every<br>6-8h (oral) +<br>metaproterenol<br>0.3-0.7 mg/kg<br>every 6-8h<br>(oral)+<br>prednisone<br>1.0mg/kg/day<br>for 7-14d (oral),<br>n=16<br>2) Theophylline<br>8.0mg/kg every<br>6-8h (oral) +<br>metaproterenol<br>0.3-0.7mg/kg<br>every 6-8h for<br>7-14d (oral),<br>n=16<br><br>Multiple<br>courses over 1yr | None<br><br>NR | Monthly or<br>every<br>second<br>month,<br>depending<br>on severity<br>of disease;<br><br>Growth<br>(mean<br>height gain<br>in cm/yr<br>and height<br>as<br>percentile<br>of normal<br>distribution<br>) assessed<br>(assessment<br>method<br>NR) at the<br>end of each<br>of two 1-yr<br>periods | No side effect<br>was observed<br>in a particular<br>case which<br>received<br>longer<br>duration of<br>corticosteroid<br>(high<br>cumulative<br>corticosteroid<br>dose).<br>Growth and<br>weight gains<br>for all children<br>were within<br>the normal<br>range during<br>the two<br>periods. |

|                                                        |                                       |                                             |                                                                                                                                             |                                                                                    |                                                                                          |                                                                                                                                                                                                                                                                                                                                                                                                                                                                                                                                                                                                                                                                                                      |
|--------------------------------------------------------|---------------------------------------|---------------------------------------------|---------------------------------------------------------------------------------------------------------------------------------------------|------------------------------------------------------------------------------------|------------------------------------------------------------------------------------------|------------------------------------------------------------------------------------------------------------------------------------------------------------------------------------------------------------------------------------------------------------------------------------------------------------------------------------------------------------------------------------------------------------------------------------------------------------------------------------------------------------------------------------------------------------------------------------------------------------------------------------------------------------------------------------------------------|
| <p>Buckingham 2002<br/>USA<br/>Non-industry funded</p> | <p>RCT<br/>Pediatric<br/>hospital</p> | <p>RSV<br/>(bronchiolitis)<br/>&lt;24mo</p> | <p>1)<br/>Dexamethasone<br/>0.5mg/kg/dose<br/>every 12h for 4d<br/>(IV), n=22<br/>2) Placebo<br/>saline every 12h<br/>for 4d (IV), n=19</p> | <p>Other<br/>treatment<br/>(not specified)<br/><br/>No CS in<br/>preceding 3wk</p> | <p>Enrolment<br/>&amp; daily until<br/>discharge;<br/>FU 30d<br/>after<br/>enrolment</p> | <p>Serious<br/>adverse<br/>events<br/>occurred in 2<br/>patients in the<br/>dexamethasone<br/>group. One<br/>infant<br/>developed<br/>progressive<br/>respiratory<br/>failure that<br/>did not<br/>improve with<br/>high-<br/>frequency<br/>oscillatory<br/>ventilation or<br/>extracorporeal<br/>membrane<br/>oxygenation;<br/>support was<br/>withdrawn,<br/>and this infant<br/>died on study<br/>day 38.<br/>Another<br/>subject<br/>developed<br/>pneumothorax,<br/>which<br/>resolved<br/>following<br/>placement of<br/>a pigtail<br/>thoracotomy<br/>catheter, on<br/>study day 7.<br/>Neither<br/>adverse event<br/>was judged to<br/>be related to<br/>administration<br/>of the study</p> |
|--------------------------------------------------------|---------------------------------------|---------------------------------------------|---------------------------------------------------------------------------------------------------------------------------------------------|------------------------------------------------------------------------------------|------------------------------------------------------------------------------------------|------------------------------------------------------------------------------------------------------------------------------------------------------------------------------------------------------------------------------------------------------------------------------------------------------------------------------------------------------------------------------------------------------------------------------------------------------------------------------------------------------------------------------------------------------------------------------------------------------------------------------------------------------------------------------------------------------|

|                                                           |                                       |                          |                                                                                                                                                                                                                                                                                      |                                                                                 |                                   |                                                                                                                                                                                                        |
|-----------------------------------------------------------|---------------------------------------|--------------------------|--------------------------------------------------------------------------------------------------------------------------------------------------------------------------------------------------------------------------------------------------------------------------------------|---------------------------------------------------------------------------------|-----------------------------------|--------------------------------------------------------------------------------------------------------------------------------------------------------------------------------------------------------|
|                                                           |                                       |                          |                                                                                                                                                                                                                                                                                      |                                                                                 |                                   | drug. No patients in either group had microscopic or gross gastrointestinal bleeding, and no patients required antihypertensive therapy during the study.                                              |
| Bulow 1999<br>Denmark<br>Non-industry funded              | RCT<br>Pediatric<br>hospital<br>3     | RSV (bronchitis)<br>0-2y | 1) Prednisolone 5.0mg/ml at dose of 2mg/kg/day, first dose at enrolment and for 4d (oral), or methylprednisolone for patients with IV line (40.0mg/ml at dose of 1.5mg/kg/day) for 5d (IV), n=73<br>2) quinine hydrochloride (or saline for patients with IV line) for 5d (IV), n=74 | Beta-2-agonist, antibiotics, oxygen & hydration<br><br>No CS in preceding month | Enrolment & 5d;<br>FU 1mo & at 1y | A total of 11 patients (7 in the prednisolone group and 4 in the placebo group) did not complete the treatment because of side effects, primarily vomiting (8 patients), which were mild in all cases. |
| Chang 2008<br>Australia<br>Non-industry & industry funded | RCT<br>Pediatric & general<br>ED<br>3 | Asthma<br>2-15y          | 1) Prednisolone 1.0mg/kg (max. 50.0mg/day) for 3d + placebo solution for 2d (oral), n=101<br>2) Prednisolone 1.0mg/kg (max.                                                                                                                                                          | NR<br><br>No maintenance CS or CS preceding presentation                        | 24h, 48h, D5, D7, D10, D14 & D28  | There were five recorded adverse events, with no significant difference between groups. In the 3-day group,                                                                                            |

|                                              |                                                                           |                 |                                                                                                                                                                                                                                                |                                                                       |                                                     |                                                                                                                                                                                                        |
|----------------------------------------------|---------------------------------------------------------------------------|-----------------|------------------------------------------------------------------------------------------------------------------------------------------------------------------------------------------------------------------------------------------------|-----------------------------------------------------------------------|-----------------------------------------------------|--------------------------------------------------------------------------------------------------------------------------------------------------------------------------------------------------------|
|                                              |                                                                           |                 | 50.0mg/day) for 5d (oral), n=100                                                                                                                                                                                                               |                                                                       |                                                     | two parents reported that their child had behavioural disturbance (cranky and irritable) and one had a rash, while two children in the 5-day group had behavioural disturbance (angry and aggressive). |
| Chen 2008<br>China<br>Funding NR             | RCT, 3-arm<br>Pediatric<br>outpatient,<br>hospital<br>ward,<br>or ED<br>1 | Asthma<br>1-14y | 1) Budesonide 0.5mg (neb) + sal + ipratropium; 1-6yo (n=32); 6-14yo (n=21)<br>2) Budesonide 0.2-0.4mg (neb) + sal + ipratropium; 1-6yo (n=25); 6-14yo (n=16)<br>3) Dexamethasone 2.0mg (<2yo), 4.0mg (2-6yo) (IV); 1-6yo (n=15); 6-14yo (n=14) | NR<br><br>No CS within 48h                                            | 0.5h before & post-treatment & 5d post-treatment    | All three groups of children showed no adverse effects.                                                                                                                                                |
| Chub-Appakarn 2007<br>Thailand<br>Funding NR | RCT<br>Pediatric<br>hospital<br>ward<br>1                                 | Croup<br>6mo-5y | 1) Dexamethasone 0.5ml/kg of 0.15 mg/kg, single dose (IV), n=20<br>2) Dexamethasone 0.5 ml/kg of                                                                                                                                               | Epinephrine, mist, antibiotics & oxygen<br><br>No CS in preceding 2wk | 0, 1h, 2h, 3h, 4h, 6h, 8h, 10h & 12h post-treatment | There was no significant adverse reaction from dexamethasone treatment in either group.                                                                                                                |

|                                                          |                                           |                |                                                                                                                |                                                                                    |                                                                                                          |                                                                                                                                                                                                                                                                                                                                                                                                                                                                                                         |
|----------------------------------------------------------|-------------------------------------------|----------------|----------------------------------------------------------------------------------------------------------------|------------------------------------------------------------------------------------|----------------------------------------------------------------------------------------------------------|---------------------------------------------------------------------------------------------------------------------------------------------------------------------------------------------------------------------------------------------------------------------------------------------------------------------------------------------------------------------------------------------------------------------------------------------------------------------------------------------------------|
|                                                          |                                           |                | 0.6mg/kg, single dose (IV), n=21                                                                               |                                                                                    |                                                                                                          |                                                                                                                                                                                                                                                                                                                                                                                                                                                                                                         |
| Clavenna 2014<br>Italy<br>Non-industry & industry funded | RCT<br>Family pediatric health units<br>9 | Wheeze<br>1-5y | 1) Beclomethasone 400mcg (1ml) twice daily for 10d (neb), n=264<br>2) Placebo twice daily for 10d (neb), n=261 | Paracetamol, nasal saline irrigation & antibiotics<br><br>No CS in preceding month | Entry visit, D11 (or prior if requested by parents) & daily diary symptom recording during 10d treatment | No differences were found in the incidence of adverse events reported by parents at the end of the therapy.<br>Table 4 AEs reported by parents, n (beclo vs. placebo):<br>Any AEs (97 vs. 98)<br>Hoarseness (34 vs. 34);<br>Diarrhea (27 vs. 35);<br>Skin rash (19 vs. 22);<br>Vomiting (19 vs. 20);<br>Candidiasis (12 vs. 15);<br>Others (25 vs. 26)<br>Two serious adverse events were reported by pediatricians: 1 hospital admission for urinary tract infection in the beclomethasone group and 1 |

|                                     |                           |              |                                                                                                                                                                                                                                                                                                                                                                      |                                  |                                                          |                                                                                                                                                                                                                                                                                                                                                                    |
|-------------------------------------|---------------------------|--------------|----------------------------------------------------------------------------------------------------------------------------------------------------------------------------------------------------------------------------------------------------------------------------------------------------------------------------------------------------------------------|----------------------------------|----------------------------------------------------------|--------------------------------------------------------------------------------------------------------------------------------------------------------------------------------------------------------------------------------------------------------------------------------------------------------------------------------------------------------------------|
|                                     |                           |              |                                                                                                                                                                                                                                                                                                                                                                      |                                  |                                                          | hospitalization for adenoidectomy and tonsillectomy in the placebo group. Neither adverse event was drug related.                                                                                                                                                                                                                                                  |
| Connett 1994 UK Non-industry funded | RCT, factorial Hospital 1 | Asthma >18mo | 1) Prednisolone 2.0mg/kg single dose (oral) + sal 0.15mg/kg every 30min for 3h (max. 5.0mg) (neb), n=18<br>2) Prednisolone 2.0mg/kg single dose (oral) + sal 5.0mg every 1-4h as needed (neb), n=19<br>3) Placebo single dose (oral) + sal 0.15mg/kg every 30min for 3h (neb), n=15<br>4) Placebo single dose (oral) plus sal 5.0mg every 1-4h as needed (neb), n=18 | NR<br><br>No CS in preceding 2wk | On arrival, after nebulization & at treatment completion | Tremor and hyperactivity were more commonly reported in those children receiving the more intensive nebuliser regimen but symptoms were mild and self-limiting in most instances. Vomiting was more a feature of disease severity than any particular treatment group. There was no significant change in heart and respiratory rates throughout the study period, |

|                                                          |                      |                              |                                                                                                                                                           |                                                |                                                          |                                                                                                                                                                                                                                                                                  |
|----------------------------------------------------------|----------------------|------------------------------|-----------------------------------------------------------------------------------------------------------------------------------------------------------|------------------------------------------------|----------------------------------------------------------|----------------------------------------------------------------------------------------------------------------------------------------------------------------------------------------------------------------------------------------------------------------------------------|
|                                                          |                      |                              |                                                                                                                                                           |                                                |                                                          | though there was a trend towards decreasing tachypnoea in all four groups.                                                                                                                                                                                                       |
| Connolly 1969<br>Ireland<br>Funding NR                   | RCT<br>Hospital<br>1 | RSV<br>Bronchiolitis<br>0-2y | 1) Prednisolone<br>D1=15.0mg;<br>D2-3=10.0mg;<br>D4-5=5.0mg;<br>D6-7=2.5mg<br>(NR, likely IV),<br>n=47<br>2) Placebo (NR,<br>likely IV), n=48             | Ampicillin,<br>oxygen<br><br>NR                | FU 1mo &<br>1y                                           | There was no evidence in this trial that prednisolone treatment of the patients affected the antibody response. In the dosage used in this trial, prednisolone had no beneficial or harmful effects on the course of the disease in severely ill children. There were no deaths. |
| Corneli 2007<br>USA<br>Non-industry &<br>industry funded | RCT<br>ED<br>20      | Bronchiolitis<br>2-12mo      | 1)<br>Dexamethasone<br>1.0mg/kg (max.<br>12mg), single<br>dose (oral),<br>n=305<br>2) Placebo<br>solution<br>1.0ml/kg (max.<br>12ml), NR (oral),<br>n=295 | Not specified<br><br>No CS in<br>preceding 14d | Baseline, 1h<br>& 4 h;<br>FU at 7-10d<br>by<br>telephone | There were few adverse events. No infant had gastrointestinal bleeding, hypertension, or complicated varicella. Vomiting within 20 min after administratio                                                                                                                       |



|                                         |                            |              |                                                                                                                                        |                                                                                                     |                                                                  |                                                                                                                                                                                                                                                                                                                                   |
|-----------------------------------------|----------------------------|--------------|----------------------------------------------------------------------------------------------------------------------------------------|-----------------------------------------------------------------------------------------------------|------------------------------------------------------------------|-----------------------------------------------------------------------------------------------------------------------------------------------------------------------------------------------------------------------------------------------------------------------------------------------------------------------------------|
|                                         |                            |              |                                                                                                                                        |                                                                                                     |                                                                  | n of study medication (5.5% in dex; 4.7% in placebo). Pneumonia was diagnosed in three infants; two were in the placebo group, and an empyema developed in one of these two infants.                                                                                                                                              |
| Cronin 2016 Ireland Non-industry funded | RCT Tertiary hospital ED 1 | Asthma 2-16y | 1) Dexamethasone 0.3mg/kg (max. 12.0mg) single dose, n=123<br>2) Prednisolone 1.0mg/kg per day, once daily (max. 40.0mg) for 3d, n=122 | Regular inhaled bronchodilators prior to enrolment in trial<br><br>No IV or oral CS in previous 4wk | Baseline & D4 for primary outcome; 14d period for adverse events | Seven patients in the PRED group (5.7%) vomited within 30 minutes of the dose of steroid on day 1 in the ED compared with none in the DEX group (absolute difference - 5.7%; 95%CI - 9.9% to - 1.54%). Seven patients vomited after the prednisolone dose on day 2, and 6 vomited after the dose on day 3. A total of 14 patients |

|                                               |                          |                                                                    |                                                                                                                                                                        |              |                                                                                      |                                                                                                                                                                                                                                                                                                                                                                                  |
|-----------------------------------------------|--------------------------|--------------------------------------------------------------------|------------------------------------------------------------------------------------------------------------------------------------------------------------------------|--------------|--------------------------------------------------------------------------------------|----------------------------------------------------------------------------------------------------------------------------------------------------------------------------------------------------------------------------------------------------------------------------------------------------------------------------------------------------------------------------------|
|                                               |                          |                                                                    |                                                                                                                                                                        |              |                                                                                      | vomited after at least 1 dose of prednisolone. No other adverse events attributable to the study medications were noted.                                                                                                                                                                                                                                                         |
| Csonka 2003<br>Finland<br>Non-industry funded | RCT<br>Pediatric ED<br>1 | Viral respiratory infection-induced lower airway disease<br>6-35mo | 1) Prednisolone 2.0mg/kg in ED followed by 2.0mg/kg/day for 3d (oral), n=113<br>2) Placebo 10.0mL fructose in water (in ED) followed by subsequent doses for 3d, n=117 | NR<br><br>NR | Diary recordings twice daily for 14d; examination by physician 14d-21d post-ED visit | Fifteen children (4 in the placebo group and 11 in the prednisolone group) discontinued the study medication because of perceived side effects. The reported reactions were mild and resolved without special interventions. These included vomiting (4 vs 9), diarrhea (6 vs 6), rash (0 vs 2), and restlessness (2 vs 3) in the placebo and prednisolone groups, respectively. |

|                                                                                                                                                                                                                                                                   |                                                                          |                                                        |                                           |                                                                                                                                                                                                                                                                                                                                                                                                                                                                                                                                                                                                                             |                                       |                                       |                                                                                                                                                                                                                                                           |
|-------------------------------------------------------------------------------------------------------------------------------------------------------------------------------------------------------------------------------------------------------------------|--------------------------------------------------------------------------|--------------------------------------------------------|-------------------------------------------|-----------------------------------------------------------------------------------------------------------------------------------------------------------------------------------------------------------------------------------------------------------------------------------------------------------------------------------------------------------------------------------------------------------------------------------------------------------------------------------------------------------------------------------------------------------------------------------------------------------------------------|---------------------------------------|---------------------------------------|-----------------------------------------------------------------------------------------------------------------------------------------------------------------------------------------------------------------------------------------------------------|
| 1<br>2<br>3<br>4<br>5<br>6<br>7<br>8<br>9<br>10<br>11<br>12<br>13<br>14<br>15<br>16<br>17<br>18<br>19<br>20<br>21<br>22<br>23<br>24<br>25<br>26<br>27<br>28<br>29<br>30<br>31<br>32<br>33<br>34<br>35<br>36<br>37<br>38<br>39<br>40<br>41<br>42<br>43<br>44<br>45 | Daugbjerg<br>1993<br>Denmark<br>Non-<br>industry &<br>industry<br>funded | RCT, 4-<br>arm<br>Pediatri<br>c<br>depart<br>ment<br>5 | First or<br>recurrent<br>wheeze<br>0-18mo | 1) Prednisolone<br>4.0-6.0mg/kg on<br>admission; D2-<br>3=1.6-2.6mg/kg<br>(oral) +<br>terbutaline<br>0.12-0.2mg/kg<br>(4ml) every 4h<br>until discharge<br>or for 5d (neb),<br>n=31<br>2) Placebo<br>solution (oral) +<br>budesonide<br>0.5mg every 4h<br>until discharge<br>or for 5d (neb) +<br>terbutaline<br>0.12-0.2mg/kg<br>(4ml) every 4h<br>until discharge<br>or for 5d, n=29<br>3) Placebo<br>solution (oral) +<br>placebo (neb) +<br>terbutaline<br>0.12-0.2mg/kg<br>every 4h until<br>discharge or for<br>5d (neb), n=27<br>4) Placebo<br>solution (oral) +<br>placebo (neb) +<br>placebo saline<br>(neb), n=27 | NR<br><br>No CS<br>preceding<br>study | Daily for 5d<br>or until<br>discharge | No side<br>effects were<br>observed,<br>specifically no<br>hoarseness,<br>oral<br>candidiasis or<br>continued<br>fever, in any<br>of the groups.<br>No significant<br>tachycardia<br>was found in<br>the treatment<br>groups<br>compared<br>with placebo. |
| 46<br>47<br>48<br>49<br>50<br>51<br>52<br>53<br>54<br>55<br>56<br>57                                                                                                                                                                                              | Dawson<br>1993<br>Australia<br>Industry<br>funded                        | RCT<br>Hospita<br>l<br>1                               | Asthma<br><6.5y                           | 1) Prednisolone<br>1.0mg/kg<br>tablets, every<br>24h for 5d<br>(oral), n=25<br>2) Prednisolone<br>1.0mg/kg<br>solution, every                                                                                                                                                                                                                                                                                                                                                                                                                                                                                               | None<br><br>NR                        | D1 to D5                              | Twenty-one<br>of the<br>children<br>taking the<br>solution took<br>it easily on<br>day 3,<br>compared to<br>two in the                                                                                                                                    |

1  
2  
3  
4  
5  
6  
7  
8  
9  
10  
11  
12  
13  
14  
15  
16  
17  
18  
19  
20  
21  
22  
23  
24  
25  
26  
27  
28  
29  
30  
31  
32  
33  
34  
35  
36  
37  
38  
39  
40  
41  
42  
43  
44  
45  
46  
47  
48  
49  
50  
51  
52  
53  
54  
55  
56  
57  
58  
59  
60

|  |  |  |                            |  |  |                                                                                                                                                                                                                                                                                                                                                                                                                                                                                                                                                       |
|--|--|--|----------------------------|--|--|-------------------------------------------------------------------------------------------------------------------------------------------------------------------------------------------------------------------------------------------------------------------------------------------------------------------------------------------------------------------------------------------------------------------------------------------------------------------------------------------------------------------------------------------------------|
|  |  |  | 24h for 5d<br>(oral), n=26 |  |  | <p>tablet group on the same day. A difference was noted on day 1 with regard to mood change but there was no significant difference at any stage between the groups in terms of excitability. The only children who appeared to be nauseated on day 1 were eight children receiving the tablet treatment. Thereafter, only one child in the tablet group experienced severe nausea although the incidence of mild nausea was evenly distributed. We could not demonstrate any statistical difference between the two treatments in terms of their</p> |
|--|--|--|----------------------------|--|--|-------------------------------------------------------------------------------------------------------------------------------------------------------------------------------------------------------------------------------------------------------------------------------------------------------------------------------------------------------------------------------------------------------------------------------------------------------------------------------------------------------------------------------------------------------|

For peer review only

|                                                           |                      |                                                     |                                                                                                                                                                                                                                                                             |                                                                                                                   |                                                                                                                                                                               |                                                                                                                                                                                                                                                        |
|-----------------------------------------------------------|----------------------|-----------------------------------------------------|-----------------------------------------------------------------------------------------------------------------------------------------------------------------------------------------------------------------------------------------------------------------------------|-------------------------------------------------------------------------------------------------------------------|-------------------------------------------------------------------------------------------------------------------------------------------------------------------------------|--------------------------------------------------------------------------------------------------------------------------------------------------------------------------------------------------------------------------------------------------------|
|                                                           |                      |                                                     |                                                                                                                                                                                                                                                                             |                                                                                                                   |                                                                                                                                                                               | propensity to cause vomiting (on all five days), abdominal pain frequency (days 2-5), nausea (days 2-5) or mood change (days 2-5). As a result of persistent vomiting, the parents of two children receiving tablets stopped treatment prematurely.    |
| Ducharme 2009<br>Canada<br>Non-industry & industry funded | RCT<br>Hospital<br>5 | >=3 wheeze episodes in lifetime, onset of URTI 1-6y | 1) Fluticasone propionate 250mcg (3 doses twice daily at start of URTI) until 48h elapsed without symptoms, for max. 10d (MDI), n=62<br>2) Placebo (3 doses twice daily at start of URTI until 48h elapsed without symptoms (MDI), n=67<br><br>Multiple courses over 6-12mo | Albuterol, nasal saline irrigation<br><br>No more than 1 dose of CS in preceding 6mo or 2 doses in preceding 12mo | Monthly telephone contacts and a medical visit every 4mo;<br><br>Growth assessed using an upright stadiometer at baseline, every month, and at the end of follow-up (6-12mo); | Thirteen serious adverse events (4 in fluticasone group and 9 in placebo) occurred in 13 children during the study period - namely, pneumonia, seizure, admission to an intensive care unit, burn, respiratory syncytial virus infection, atelectasis, |

1  
2  
3  
4  
5  
6  
7  
8  
9  
10  
11  
12  
13  
14  
15  
16  
17  
18  
19  
20  
21  
22  
23  
24  
25  
26  
27  
28  
29  
30  
31  
32  
33  
34  
35  
36  
37  
38  
39  
40  
41  
42  
43  
44  
45  
46  
47  
48  
49  
50  
51  
52  
53  
54  
55  
56  
57  
58  
59  
60

|  |  |  |  |  |                                                                                                                                            |                                                                                                                                                                                                                                                                                                                                                                                                                                                                                                                                                                                                                                                                                                                                           |
|--|--|--|--|--|--------------------------------------------------------------------------------------------------------------------------------------------|-------------------------------------------------------------------------------------------------------------------------------------------------------------------------------------------------------------------------------------------------------------------------------------------------------------------------------------------------------------------------------------------------------------------------------------------------------------------------------------------------------------------------------------------------------------------------------------------------------------------------------------------------------------------------------------------------------------------------------------------|
|  |  |  |  |  | <p>Basal cortisol assessed using an immunoassay system, with or without corticotropin testing, at baseline and end of the study (12mo)</p> | <p>and Kawasaki's disease. None of the serious adverse events were considered by an independent physician masked to treatment to be attributable to the study drug.</p> <p>Table E3 adverse health events, n (FP vs. placebo):<br/>                 Otitis media (27 vs. 23);<br/>                 Fever (18 vs. 20);<br/>                 Gastroenteritis (14 vs. 11);<br/>                 Pneumonia (13 vs. 10);<br/>                 Sinusitis (10 vs. 9);<br/>                 Injuries (5 vs. 9);<br/>                 Chickenpox (9 vs. 6);<br/>                 Croup (5 vs. 4);<br/>                 Vomiting (4 vs. 4);<br/>                 Pharyngitis (6 vs. 4);<br/>                 Streptococcal infection (2 vs. 4);</p> |
|--|--|--|--|--|--------------------------------------------------------------------------------------------------------------------------------------------|-------------------------------------------------------------------------------------------------------------------------------------------------------------------------------------------------------------------------------------------------------------------------------------------------------------------------------------------------------------------------------------------------------------------------------------------------------------------------------------------------------------------------------------------------------------------------------------------------------------------------------------------------------------------------------------------------------------------------------------------|

1  
2  
3  
4  
5  
6  
7  
8  
9  
10  
11  
12  
13  
14  
15  
16  
17  
18  
19  
20  
21  
22  
23  
24  
25  
26  
27  
28  
29  
30  
31  
32  
33  
34  
35  
36  
37  
38  
39  
40  
41  
42  
43  
44  
45  
46  
47  
48  
49  
50  
51  
52  
53  
54  
55  
56  
57  
58  
59  
60

|  |  |  |  |  |  |                                                                                                                                                                                                                                                                                                                                                                                                                                                                                                                                   |
|--|--|--|--|--|--|-----------------------------------------------------------------------------------------------------------------------------------------------------------------------------------------------------------------------------------------------------------------------------------------------------------------------------------------------------------------------------------------------------------------------------------------------------------------------------------------------------------------------------------|
|  |  |  |  |  |  | Conjunctivitis (2 vs. 3);<br>Eczema (6 vs. 1);<br>Rash (5 vs. 2);<br>Serous otitis media (4 vs. 2)<br>Author reports harms separately from adverse health events: harm defined as failure to thrive, defined by a weight below the 3rd percentile at the end of the study period or a decrease in weight by at least 2 major percentile lines on the Centers for Diseases Control and Prevention growth charts. The gain in height and weight was significantly lower in children treated with fluticasone than in children given |
|--|--|--|--|--|--|-----------------------------------------------------------------------------------------------------------------------------------------------------------------------------------------------------------------------------------------------------------------------------------------------------------------------------------------------------------------------------------------------------------------------------------------------------------------------------------------------------------------------------------|

For peer review only

|                                                 |                                               |                         |                                                                                       |                                                   |                                                                                       |                                                                                                                                                                                                                                                                                                                                                                                                                                                                             |
|-------------------------------------------------|-----------------------------------------------|-------------------------|---------------------------------------------------------------------------------------|---------------------------------------------------|---------------------------------------------------------------------------------------|-----------------------------------------------------------------------------------------------------------------------------------------------------------------------------------------------------------------------------------------------------------------------------------------------------------------------------------------------------------------------------------------------------------------------------------------------------------------------------|
|                                                 |                                               |                         |                                                                                       |                                                   |                                                                                       | <p>placebo, with a difference between the groups of 5 percentage points. Two children in the fluticasone group and 1 in the placebo group met the definition of failure to thrive; the number needed to harm was not significant. There were no significant group differences in the change in lumbar bone mineral density, bone mineral content, or bone age; low values for these and cortisol were normal when repeated or when corticotropin testing was performed.</p> |
| <p>Eboriadou 2010<br/>Greece<br/>Funding NR</p> | <p>RCT, 3-arm<br/>Pediatri<br/>c ED<br/>1</p> | <p>Croup<br/>6mo-5y</p> | <p>1) L-epinephrine<br/>5.0ml (1 of<br/>1:1000mg/ml),<br/>5-10min (neb),<br/>n=25</p> | <p>Oxygen<br/><br/>No CS in<br/>preceding 24h</p> | <p>Before<br/>treatment<br/>&amp; at 15min,<br/>20min,<br/>60min,<br/>90min &amp;</p> | <p>The L-epinephrine group was the only group with side effects of</p>                                                                                                                                                                                                                                                                                                                                                                                                      |



|                                                            |                            |                   |                                                                                                                                                                                                                                    |                                                                    |                                                                                              |                                                                                                                                                                                                                            |
|------------------------------------------------------------|----------------------------|-------------------|------------------------------------------------------------------------------------------------------------------------------------------------------------------------------------------------------------------------------------|--------------------------------------------------------------------|----------------------------------------------------------------------------------------------|----------------------------------------------------------------------------------------------------------------------------------------------------------------------------------------------------------------------------|
|                                                            |                            |                   | 2)<br>Dexamethasone<br>0.6mg/kg (max.<br>8mg), single<br>dose (IM), n=19<br>3)<br>Beclomethason<br>e dipropionate<br>200mcg (MDI),<br>n=20                                                                                         |                                                                    | 120min<br>post-<br>treatment;<br>patients<br>asked to<br>return if<br>relapse in<br>next 24h | treatment.<br>Tremor and<br>tachycardia<br>were<br>observed in 4<br>children from<br>Group A, who<br>had received<br>LE and were<br>resolved after<br>2 hours, when<br>the action of<br>LE wear off.                       |
| Eden 1967<br>USA<br>Industry<br>funded                     | RCT<br>Hospital<br>1       | Croup<br>8mo-5y   | 1)<br>Dexamethasone<br>0.10mg/kg at<br>0.1cc/kg/dose<br>every 6h for<br>48h, total daily<br>0.40mg (IM),<br>n=25<br>2) Control<br>preparation<br>0.1cc/kg/dose<br>every 6h for 48h<br>(IM), n=25                                   | Oxygen,<br>humidity &<br>tetracycline<br><br>NR                    | Every 6h for<br>total 48h                                                                    | No untoward<br>effects were<br>noted. There<br>were no<br>episodes of<br>congestive<br>heart failure<br>or sodium<br>retention.                                                                                            |
| Escobedo<br>Chavez<br>1992<br>Mexico<br>Industry<br>funded | RCT<br>Hospital<br>ED<br>1 | Asthma<br>1mo-14y | 1)<br>Methylprednisol<br>one 3.0mg/kg,<br>single dose (IM)<br>+ placebo 4.5ml<br>+ sal 0.5ml<br>every 4h (neb),<br>n=25<br>2)<br>Aminophylline<br>5.0mg/kg every<br>6h (IV) + sal 70<br>mcg/kg every 8h<br>+ oxygen (neb),<br>n=25 | Saline,<br>salbutamol &<br>oxygen<br><br>No CS in<br>preceding 15d | Baseline &<br>discharge                                                                      | We detected<br>no side<br>effects with<br>the use of<br>methylprednis<br>olone in a<br>single dose or<br>any treatment<br>failures that<br>merited the<br>use of<br>methylxanthin<br>es or<br>additional<br>steroid doses. |
| Fifoot 2007<br>Australia                                   | RCT, 3-<br>arm             | Croup<br>6mo-6y   | 1) Prednisolone<br>0.2ml/kg of<br>1.0mg/kg, single                                                                                                                                                                                 | Antipyretics or<br>nebulized<br>adrenaline                         | Baseline &<br>hourly up                                                                      | No patient<br>suffered any<br>adverse                                                                                                                                                                                      |

|                                           |                       |              |                                                                                                                                                          |                                                                               |                                                                 |                                                                                                                                                                                                                                                                         |
|-------------------------------------------|-----------------------|--------------|----------------------------------------------------------------------------------------------------------------------------------------------------------|-------------------------------------------------------------------------------|-----------------------------------------------------------------|-------------------------------------------------------------------------------------------------------------------------------------------------------------------------------------------------------------------------------------------------------------------------|
| Non-industry funded                       | Pediatric ED<br>1     |              | dose (oral), n=34<br>2) Dexamethasone 0.2ml/kg of 0.15mg/kg, single dose (oral), n=34<br>3) Dexamethasone 0.2ml/kg of 0.6mg/kg, single dose (oral), n=31 | No CS in preceding wk                                                         | to 4h post-treatment; FU 1wk by telephone following index visit | outcomes from receiving study steroid, either at index presentation or during the follow-up period. One patient from each group vomited their first dose of medication, all except one (dex 0.6mg/kg) tolerated second dose.                                            |
| Fitzgerald 1996<br>Canada Industry funded | RCT Pediatric ED<br>3 | Croup 6mo-6y | 1) Budesonide 2.0mg (4ml) for 5min (neb), n=35<br>2) Adrenaline 4.0mg (4ml) for 5min (neb), n=31                                                         | Additional medications permitted 2h after study<br><br>No CS in preceding 4wk | Baseline, 30min, 60min, 90min, 120min, 12h & 24h post-treatment | Six patients in each treatment group reported adverse events. These included vomiting, an erythematous rash, diarrhea, wakefulness, excessively active behavior, wheezing, and a nosebleed. These were minor and did not result in withdrawal from the study or require |

|                                   |                                                |              |                                                                                                                                                           |                                                    |          |                                                                                                                                                                                                                                                                                                                                                                                                                                                              |
|-----------------------------------|------------------------------------------------|--------------|-----------------------------------------------------------------------------------------------------------------------------------------------------------|----------------------------------------------------|----------|--------------------------------------------------------------------------------------------------------------------------------------------------------------------------------------------------------------------------------------------------------------------------------------------------------------------------------------------------------------------------------------------------------------------------------------------------------------|
|                                   |                                                |              |                                                                                                                                                           |                                                    |          | specific treatment.                                                                                                                                                                                                                                                                                                                                                                                                                                          |
| Francis 1997 Australia Funding NR | RCT (trial registry data) Acute care setting 4 | Asthma ≤48mo | 1) Fluticasone propionate 1.0mg twice daily (neb) + placebo tablets once daily (oral) for 7d, n=37<br>2) Prednisolone (dose NR) daily for 7d (oral), n=19 | NR<br><br>No CS treatment for >7d in preceding 4wk | D1 to D7 | Most frequent adverse events – on-therapy, n (FP vs. pred): Nausea & vomiting (7 vs. 1); Diarrhoea (3 vs. 0); Normal tooth eruption (2 vs. 1); Ear, nose and throat infections (2 vs. 0); Psychomotor disorders (2 vs. 0); Temperature regulation disturbances (2 vs. 0); Asthma (1 vs. 2); Hoarseness/dysphonia (0 vs. 2); Serious adverse events - on-therapy: Subjects with non-fatal SAEs (2 vs. 0); Ketonuria, glycosuria and hyperglycaemia (1 vs. 0); |

|                                      |                            |            |                                                                                                                                                                            |                                                                        |                                                                            |                                                                                                                                                                                                                                                                                                                                                                                                                                                             |
|--------------------------------------|----------------------------|------------|----------------------------------------------------------------------------------------------------------------------------------------------------------------------------|------------------------------------------------------------------------|----------------------------------------------------------------------------|-------------------------------------------------------------------------------------------------------------------------------------------------------------------------------------------------------------------------------------------------------------------------------------------------------------------------------------------------------------------------------------------------------------------------------------------------------------|
|                                      |                            |            |                                                                                                                                                                            |                                                                        |                                                                            | Subjects with fatal SAEs (0 vs. 0)                                                                                                                                                                                                                                                                                                                                                                                                                          |
| Garbutt 2013 USA Non-industry funded | RCT Primary care office 10 | Croup 1-8y | 1) Dexamethasone 0.6mg/kg (max. 18mg), single dose, followed by placebo for 2d, 2 doses total (oral), n=46<br>2) Prednisolone 2.0mg/kg/d (max. 60mg/d) for 3d (oral), n=41 | Acetaminophen & ibuprofen<br><br>No CS preceding current croup episode | FU interviews at D1 to D4 & D11; FU chart review within 28d of index visit | No serious adverse events occurred. Study groups did not differ in reporting side effects from the study medications (24% dexamethasone, 26% prednisolone, P = 1.0; Table 4). The most common side effects identified with specific questioning were mood changes (57%), sleep problems (36%), stomach pain (19%), and headache (13%).<br>Table 4 adverse events, n (dex vs. pred):<br>A side effect at D11 (11/45 vs. 10/39);<br>Mood changes (25 vs. 24); |

|                                    |                                          |                                                   |                                                                                                                                                                                                            |                                                                                           |                               |                                                                                                                                                                                                                      |
|------------------------------------|------------------------------------------|---------------------------------------------------|------------------------------------------------------------------------------------------------------------------------------------------------------------------------------------------------------------|-------------------------------------------------------------------------------------------|-------------------------------|----------------------------------------------------------------------------------------------------------------------------------------------------------------------------------------------------------------------|
|                                    |                                          |                                                   |                                                                                                                                                                                                            |                                                                                           |                               | New sleep problems (18 vs. 13);<br>Stomach pain (9 vs. 7);<br>Headache (7 vs. 4);<br>Vomiting (3 vs. 7);<br>Nausea (3 vs. 4);<br>Dizziness (3 vs. 2);<br>Tremor (1 vs. 0)                                            |
| Ghirga 2002<br>Italy<br>Funding NR | NRCT<br>NR,<br>"ambulatory infants"<br>1 | Wheeze - early URTI before signs of wheeze 7-12mo | 1) Beclomethasone 400mcg 3 doses daily for 5d (neb), n=12<br>2) Control (no intervention), n=13<br><br>Multiple courses - 4 treatment periods of 5d (12 infants completed 48 treatment periods in group 1) | NR<br><br>NR                                                                              | Twice daily                   | At this writing, four years after the study was completed, no apparent adverse effects were reported. Plasma cortisol measured in four patients receiving at least 2 treatment periods of 5 days a month was normal. |
| Gill 2017<br>Canada<br>Funding NR  | Cohort<br>Pediatric<br>hospital ED<br>1  | Croup >2y (mean 4.7y vs. 4.8y)                    | 1) Dexamethasone 0.6mg/kg (max 12mg), single dose, n=22<br>2) Controls diagnosed with viral URTI (no dexamethasone                                                                                         | NR<br><br>No chronic glucocorticoid therapy or any glucocorticoids within 10d of ED visit | AM of admission & D1, D3 & D7 | Single-dose oral dexamethasone 0.6mg/kg for croup is not associated with decreased endogenous glucocorticoid                                                                                                         |

1  
2  
3  
4  
5  
6  
7  
8  
9  
10  
11  
12  
13  
14  
15  
16  
17  
18  
19  
20  
21  
22  
23  
24  
25  
26  
27  
28  
29  
30  
31  
32  
33  
34  
35  
36  
37  
38  
39  
40  
41  
42  
43  
44  
45  
46  
47  
48  
49  
50  
51  
52  
53  
54  
55  
56  
57  
58  
59  
60

|  |  |  |                         |  |  |                                                                                                                                                                                                                                                                                                                                                                                                                                                                                                        |
|--|--|--|-------------------------|--|--|--------------------------------------------------------------------------------------------------------------------------------------------------------------------------------------------------------------------------------------------------------------------------------------------------------------------------------------------------------------------------------------------------------------------------------------------------------------------------------------------------------|
|  |  |  | or antibiotics),<br>n=5 |  |  | levels in children. A 3-year-old previously healthy boy returned to the ED within 24 hours and was given a diagnosis of pneumonia. He was discharged home from the ED with oral antibiotics, and his symptoms resolved by 7 days. The other, also a 3-year-old boy, returned to the ED 4 days after dexamethasone administration for unilateral facial swelling. Serologic testing for paramyxovirus (mumps) was negative, and he was given a diagnosis of viral parotitis. His symptoms resolved by 7 |
|--|--|--|-------------------------|--|--|--------------------------------------------------------------------------------------------------------------------------------------------------------------------------------------------------------------------------------------------------------------------------------------------------------------------------------------------------------------------------------------------------------------------------------------------------------------------------------------------------------|

For peer review only

|                            |                                         |                     |                                                                                                                 |          |                                                                     |                                                                                                                                                                                                                                                                                                                                                                                                      |
|----------------------------|-----------------------------------------|---------------------|-----------------------------------------------------------------------------------------------------------------|----------|---------------------------------------------------------------------|------------------------------------------------------------------------------------------------------------------------------------------------------------------------------------------------------------------------------------------------------------------------------------------------------------------------------------------------------------------------------------------------------|
|                            |                                         |                     |                                                                                                                 |          |                                                                     | days. Four participants visited their primary care physician within 7 days of dexamethasone administration. One patient was healthy, another was given a diagnosis of otitis media and treated with oral antibiotics, and two patients who had persistent coughs were prescribed salbutamol. None of the participants were admitted to hospital, and there were no serious adverse events or deaths. |
| Goebel 2000 USA Funding NR | RCT Pediatric ED or children's clinic 2 | Bronchiolitis ≤23mo | 1) Prednisone 2.0mg/kg/day for 5d (oral) + albuterol 0.3mg/kg/day (or 0.15mg/kg/dose (neb)) for 5d (oral), n=24 | NR<br>NR | Clinical scores on D0, D2, D3 & D6; FU when convalescence completed | One patient in the prednisolone group was observed by his caretakers to be "jittery" at times after enrollment.                                                                                                                                                                                                                                                                                      |

|                                    |                                                     |              |                                                                                                                                                 |                                     |    |                                                                                                                                                                                                                                                                                                                                                                             |
|------------------------------------|-----------------------------------------------------|--------------|-------------------------------------------------------------------------------------------------------------------------------------------------|-------------------------------------|----|-----------------------------------------------------------------------------------------------------------------------------------------------------------------------------------------------------------------------------------------------------------------------------------------------------------------------------------------------------------------------------|
|                                    |                                                     |              | 2) Placebo solution (oral) + albuterol 0.3mg/kg/day (or 0.15mg/kg/dose (neb)) for 5d (oral), n=24                                               |                                     |    | This resolved after a decrease in the albuterol dose. No evidence of treatment complications was observed in any of the other patients.                                                                                                                                                                                                                                     |
| Grant 1996 USA Non-industry funded | Cohort Primary care clinic & teaching hospital ED 1 | Asthma 2-14y | 1) Prednisone 2.0mg/kg (max. 60mg/day), single dose intermittent for 6mo (oral), n=86<br>2) Placebo (NR), n=86<br><br>Multiple courses over 1yr | Bronchodilators as needed<br><br>NR | NR | Ninety-four episodes of acute infection occurred in 50 subjects and 222 episodes of symptoms of infection occurred in 62 subjects (table 1 episodes of infection, number of doses, and association between doses and frequency of infection). No difference was observed in the mean number of doses of prednisone received by those with the infection compared with those |



|                           |                            |               |                                                                                                                          |                                         |                                                                                                                  |                                                                                                                                                                                                                                                                                                                                                                                    |
|---------------------------|----------------------------|---------------|--------------------------------------------------------------------------------------------------------------------------|-----------------------------------------|------------------------------------------------------------------------------------------------------------------|------------------------------------------------------------------------------------------------------------------------------------------------------------------------------------------------------------------------------------------------------------------------------------------------------------------------------------------------------------------------------------|
|                           |                            |               |                                                                                                                          |                                         |                                                                                                                  | without the infection. No correlation was observed between the number of doses of prednisone received and the number of episodes of each infection. This included all episodes of otitis media, streptococcal pharyngitis, pneumonia, and urinary tract infection; eight (73%) episodes of chickenpox; eight (57%) episodes of skin infections; and 14 (88%) episodes of ringworm. |
| Gries 2000 USA Funding NR | RCT Tertiary care center 1 | Asthma 6mo-7y | 1) Dexamethasone 1.7mg/kg/dose single dose, (IV), n=15<br>2) Prednisolone 2.2mg/kg/dose, twice daily for 5d (oral), n=17 | Albuterol<br><br>No CS in preceding 2wk | D3, D5, D7, D14 & D28;<br><br>Urinary cortisol/creatinine assessed by radioimmunoassay (standard methods) on D14 | Ten of the 17 children who received PO Pred took the prednisone without much difficulty. However, 3 children missed more than 75% of their doses                                                                                                                                                                                                                                   |

|  |  |  |  |  |  |                                                                                                                                                                                                                                                                                                                                                                                                                                                                                                                           |
|--|--|--|--|--|--|---------------------------------------------------------------------------------------------------------------------------------------------------------------------------------------------------------------------------------------------------------------------------------------------------------------------------------------------------------------------------------------------------------------------------------------------------------------------------------------------------------------------------|
|  |  |  |  |  |  | <p>because of refusal to take their medicine, and another 4 missed approximately one third of the doses despite force and coaxing by their parents. There were no complications from the IM injections including no cases of persistent swelling, bruising, soreness, or atrophy at the injection site. Patients with any personality changes within the first 5 days (%): IM dex - 10/14 (71); oral pred - 14/16 (87). The median urinary cortisol/creatinine value for the IM Dex group was lower than that for the</p> |
|--|--|--|--|--|--|---------------------------------------------------------------------------------------------------------------------------------------------------------------------------------------------------------------------------------------------------------------------------------------------------------------------------------------------------------------------------------------------------------------------------------------------------------------------------------------------------------------------------|

|                                                  |                                   |                                           |                                                                                                                                                                                                                                                                                                                                                                                             |                                             |                                                                                                                                                                                                                                                                                                                                                              |                                                                                                                                                                                                                                                                                                                                                                                                                                                  |
|--------------------------------------------------|-----------------------------------|-------------------------------------------|---------------------------------------------------------------------------------------------------------------------------------------------------------------------------------------------------------------------------------------------------------------------------------------------------------------------------------------------------------------------------------------------|---------------------------------------------|--------------------------------------------------------------------------------------------------------------------------------------------------------------------------------------------------------------------------------------------------------------------------------------------------------------------------------------------------------------|--------------------------------------------------------------------------------------------------------------------------------------------------------------------------------------------------------------------------------------------------------------------------------------------------------------------------------------------------------------------------------------------------------------------------------------------------|
|                                                  |                                   |                                           |                                                                                                                                                                                                                                                                                                                                                                                             |                                             |                                                                                                                                                                                                                                                                                                                                                              | PO Pred group, but this difference was not statistically significant.                                                                                                                                                                                                                                                                                                                                                                            |
| Hedlin 1999 <sup>1</sup><br>Sweden<br>Funding NR | RCT<br>Pediatric<br>hospital<br>1 | Asthma –<br>first sign<br>of URTI<br>1-3y | 1) Budesonide 400mcg, 4 times daily for 3d then twice daily for 7d (MDI), n=9<br>2) Placebo, 4 times daily for 3 days then twice daily for 7d (MDI), n=11<br><br>Multiple courses over 1yr, or max. 6 treatments<br><br>*subgroup of children from Svedmyr 1999 with therapeutic failure from budesonide given 3d course (6.0mg, 4.0mg, and 2.0mg on respective days) of oral betamethasone | Beta-agonists and/or theophylline<br><br>NR | D10 & D13;<br><br>Routine height measurements (assessment method NR) were taken (timing of assessments NR);<br><br>Serum cortisol (on D8-10 of second course of study medication, morning of day after third dose, and at 12-14d after therapy) and urinary cortisol/creatinine (in the night after third dose of betamethasone and at 12-14d after therapy) | There were no significant differences between pretreatment and post-treatment serum cortisol, osteocalcin, ICTP and urine cortisol/creatinine ratio in the groups, (the comparison was made in the children who had assessments before and after budesonide/placebo) nor were there any significant differences between the active and placebo treated groups. It was, however, noteworthy that the urine cortisol/creatinine ratio decreased in |

|                                     |                                   |                   |                                                                                                               |                                          |                              |                                                                                                                                                                                                                                                                                                                                                                                                  |
|-------------------------------------|-----------------------------------|-------------------|---------------------------------------------------------------------------------------------------------------|------------------------------------------|------------------------------|--------------------------------------------------------------------------------------------------------------------------------------------------------------------------------------------------------------------------------------------------------------------------------------------------------------------------------------------------------------------------------------------------|
|                                     |                                   |                   |                                                                                                               |                                          | assessed by radioimmunoassay | 5/6 children studied in the active group and in 4/10 in the placebo group. Neither this change nor the difference was statistically significant. PIIINP decreased after both budesonide and placebo treatment periods ( $p < 0.05$ ). Short courses of oral betamethasone have pronounced systemic effects, whereas 10d of high doses of budesonide do not produce significant systemic effects. |
| Husby 1993<br>Denmark<br>Funding NR | RCT<br>Pediatric<br>hospital<br>1 | Croup<br>3mo-4.9y | 1) Budesonide 1000mcg (2ml 500mcg/ml), two doses 30min apart (neb), n=20<br>2) Placebo saline 0.9% (2ml), two | Antibiotics<br><br>No CS preceding study | Baseline & 2h post-treatment | No side effects were reported.                                                                                                                                                                                                                                                                                                                                                                   |

|                            |                         |                  |                                                                                                               |                                                                                                               |    |                                                                                                                                                                                                                                                                                                                                                                                                                                                     |
|----------------------------|-------------------------|------------------|---------------------------------------------------------------------------------------------------------------|---------------------------------------------------------------------------------------------------------------|----|-----------------------------------------------------------------------------------------------------------------------------------------------------------------------------------------------------------------------------------------------------------------------------------------------------------------------------------------------------------------------------------------------------------------------------------------------------|
|                            |                         |                  | doses 30min apart (neb), n=16                                                                                 |                                                                                                               |    |                                                                                                                                                                                                                                                                                                                                                                                                                                                     |
| Inglis 1993 USA Funding NR | Case report, 2 Hospital | Croup 18mo; 14mo | Case 1) Prednisolone 1.0mg/kg, twice daily for 4d (NR)<br>Case 2) Dexamethasone 0.3mg/kg, 3 doses in 24h (NR) | Case 1: racemic epinephrine, acyclovir sodium<br>Case 2: amoxicillin/clavulanate potassium, cefuroxime sodium | NR | Case 1: Twenty days into illness, airway endoscopy revealed shallow mucosal ulcerations of patient's glottis and subglottis, but a normal appearing tracheobronchial tree. Cultures were positive for HSV-1, Staphylococcus aureus and a-hemolytic streptococcus ;<br>Case 2: On day 11 of illness, airway endoscopy revealed severe subglottic edema and ulceration, purulent tracheal secretions, but normal tracheal mucosa. A tracheal aspirate |

1  
2  
3  
4  
5  
6  
7  
8  
9  
10  
11  
12  
13  
14  
15  
16  
17  
18  
19  
20  
21  
22  
23  
24  
25  
26  
27  
28  
29  
30  
31  
32  
33  
34  
35  
36  
37  
38  
39  
40  
41  
42  
43  
44  
45  
46  
47  
48  
49  
50  
51  
52  
53  
54  
55  
56  
57  
58  
59  
60

|  |  |  |  |  |  |                                                                                                                                                                                                                                                                                                                                                                                                                                                                                              |
|--|--|--|--|--|--|----------------------------------------------------------------------------------------------------------------------------------------------------------------------------------------------------------------------------------------------------------------------------------------------------------------------------------------------------------------------------------------------------------------------------------------------------------------------------------------------|
|  |  |  |  |  |  | <p>produced a moderate growth of a-hemolytic streptococci and a few yeast. A swab of the subglottic region showed growth of HSV-1 but no respiratory syncytial virus, influenza A or B, or parainfluenza viruses. The patient required intubation postoperatively and was started on a regimen of nafcillin sodium and dexamethasone sodium phosphate, 1.5mg/kg per day. She was extubated after 48 hours and the dexamethasone therapy was discontinued. Her stridor gradually resolved</p> |
|--|--|--|--|--|--|----------------------------------------------------------------------------------------------------------------------------------------------------------------------------------------------------------------------------------------------------------------------------------------------------------------------------------------------------------------------------------------------------------------------------------------------------------------------------------------------|

For peer review only

|                                  |                                                 |              |                                                                                                                                                                                                                                  |              |          |                                                                                                                                                                                                                                                                                                                                                                                                                                  |
|----------------------------------|-------------------------------------------------|--------------|----------------------------------------------------------------------------------------------------------------------------------------------------------------------------------------------------------------------------------|--------------|----------|----------------------------------------------------------------------------------------------------------------------------------------------------------------------------------------------------------------------------------------------------------------------------------------------------------------------------------------------------------------------------------------------------------------------------------|
|                                  |                                                 |              |                                                                                                                                                                                                                                  |              |          | spontaneously over the next 7 days without further intervention.                                                                                                                                                                                                                                                                                                                                                                 |
| Jan 2000<br>Taiwan<br>Funding NR | Non-RCT<br>Pediatric<br>hospital<br>clinic<br>1 | Asthma<br>NR | 1) Group A:<br>Methylprednisolone<br>1.0mg/kg/6h<br>(IV) for 1d,<br>n=NR<br>2) Group B:<br>Methylprednisolone<br>1.0mg/kg/6h<br>(IV) for 2d,<br>n=NR<br>3) Group C:<br>Methylprednisolone<br>1.0mg/kg/6h<br>(IV) for 3d,<br>n=NR | NR<br><br>NR | D1 to D3 | An acute effect of glucocorticoid therapy on the suppression of osteoblasts was biochemically revealed by the finding of reduced serum osteocalcin levels; this suggests that early change in serum osteocalcin may be a useful indicator for patients at high risk of bone loss. Levels of serum osteocalcin progressively declined with increasing duration of GC therapy, with tendency toward a decrease of serum phosphate. |

|                                                                         |                                       |                                                         |                                                                                                                                                                                                  |                                                                                                                        |                                                                                                                                                                             |                                                                                                                                                                                       |
|-------------------------------------------------------------------------|---------------------------------------|---------------------------------------------------------|--------------------------------------------------------------------------------------------------------------------------------------------------------------------------------------------------|------------------------------------------------------------------------------------------------------------------------|-----------------------------------------------------------------------------------------------------------------------------------------------------------------------------|---------------------------------------------------------------------------------------------------------------------------------------------------------------------------------------|
|                                                                         |                                       |                                                         |                                                                                                                                                                                                  |                                                                                                                        |                                                                                                                                                                             | However, serum calcium levels remained unchanged before and after therapy. Osteocalcin levels ( $\mu\text{g/L}$ ): Group A - 2.7 +/- 3.; Group B - 2.2 +/- 1.9; Group C - 1.8 +/- 1.5 |
| Jartti 2006<br>Finland<br>Non-<br>industry<br>and<br>industry<br>funded | RCT<br>Pediatri<br>c<br>hospital<br>1 | First or<br>second<br>wheeze<br>episode<br>3mo-<br>35mo | 1) Prednisolone<br>5.0mg tablets,<br>first dose<br>2.0mg/kg then<br>2.0mg/kg/day in<br>3 divided doses<br>for 3d (oral),<br>n=46<br>2) Placebo<br>tablets, in 3<br>divided doses<br>for 3d, n=32 | Albuterol,<br>beta-2-<br>agonists,<br>antibiotics, &<br>racemic<br>epinephrine<br><br>No CS in<br>preceding 4<br>weeks | Study entry<br>& twice<br>daily during<br>hospitalizati<br>on, daily<br>diary notes<br>for 2wk<br>post-<br>discharge;<br>FU visit &<br>phone call<br>2wk post-<br>discharge | The<br>prednisolone<br>treatment<br>was well<br>tolerated. No<br>clinically<br>significant<br>adverse<br>effects<br>occurred.                                                         |
| Jartti 2007<br>Finland<br>Non-<br>industry<br>and<br>industry<br>funded | RCT<br>Pediatri<br>c<br>hospital<br>1 | At least<br>third<br>wheeze<br>3mo-7y                   | 1) Prednisolone<br>5.0mg tablets,<br>first dose<br>2.0mg/kg then<br>2.0mg/kg/day in<br>3 divided doses<br>for 3d (oral),<br>n=23<br>2) Placebo for<br>3d, n=35                                   | Salbutamol &<br>antibiotics<br><br>No CS in<br>preceding 4wk                                                           | Study entry<br>& twice<br>daily during<br>hospitalizati<br>on, daily<br>diary notes<br>for 2wk<br>post-<br>discharge;<br>FU visit &<br>phone call<br>2wk post-<br>discharge | The<br>prednisolone<br>treatment<br>was well<br>tolerated. No<br>clinically<br>significant<br>adverse<br>effects<br>occurred.                                                         |
| Jartti 2015<br>Finland                                                  | RCT                                   | Wheeze –<br>first<br>acute                              | 1) Prednisolone<br>first dose<br>2.0mg/kg, then                                                                                                                                                  | NR                                                                                                                     | 2wk daily<br>diary; FU at<br>2wk, 2mo &                                                                                                                                     | There were<br>no differences<br>in the                                                                                                                                                |



|                                         |                       |                                                    |                                                                                                                                                            |                                                                  |                                                                                   |                                                                                                                                                      |
|-----------------------------------------|-----------------------|----------------------------------------------------|------------------------------------------------------------------------------------------------------------------------------------------------------------|------------------------------------------------------------------|-----------------------------------------------------------------------------------|------------------------------------------------------------------------------------------------------------------------------------------------------|
| Non-industry and industry funded        | University hospital 1 | rhinovirus-induced 3-23mo (mean 13.2mo vs. 12.2mo) | 2mg/kg/d in 2 divided doses for 3d (max. 60.0mg/day), n=34<br>2) Placebo, n=40<br><br>Multiple courses over 1yr                                            | No previous systemic or inhaled CS treatment                     | 12mo post-discharge                                                               | incidence of adverse events between the prednisolone and placebo groups (results not shown). No clinically significant adverse events were reported. |
| Johnson 1996 Canada Non-industry funded | RCT Pediatric ED 1    | Croup mean 15mo vs. 17mo                           | 1) Dexamethasone 10.0mg (4ml) - 10.0mg (<8kg), 15.0mg (8-12kg) or 20.0mg (>12kg), 10min (neb), n=28<br>2) Control, saline (4ml), 10min (neb), n=27         | Humidified oxygen<br><br>No CS in preceding 2wk                  | Baseline, 2h & 4h post-treatment                                                  | Two patients with neutropenia treated with dexamethasone had a clinical course consistent with bacterial tracheitis.                                 |
| Johnson 1998 Canada Industry funded     | RCT Pediatric ED 2    | Croup 3mo-9y                                       | 1) Budesonide 4.0mg for 20min (neb), n=48<br>2) Dexamethasone 0.6mg/kg, single dose (IM), n=47<br>3) Placebo suspension, single dose for 20min (neb), n=49 | Racemic epinephrine & mist therapy<br><br>No CS in preceding 4wk | Study entry & hourly for 5h post-treatment until discharge; FU 72h post-discharge | No child had gastrointestinal bleeding or bacterial tracheitis.                                                                                      |
| Klassen 1994 Canada Non-industry funded | RCT Pediatric ED 1    | Croup 3mo-5y                                       | 1) Budesonide 2.0mg (4ml), single dose (neb), n=27<br>2) Placebo saline 0.9%                                                                               | Racemic epinephrine or dexamethasone, or oxygen tent             | Baseline & hourly for 4h; FU at 1wk                                               | No adverse events were noted in the budesonide group. No patient in that                                                                             |

|                                               |                          |                 |                                                                                                                                                         |                                                                                        |                                                    |                                                                                                                                                                                                                                       |
|-----------------------------------------------|--------------------------|-----------------|---------------------------------------------------------------------------------------------------------------------------------------------------------|----------------------------------------------------------------------------------------|----------------------------------------------------|---------------------------------------------------------------------------------------------------------------------------------------------------------------------------------------------------------------------------------------|
|                                               |                          |                 | (4ml), single dose (neb), n=27                                                                                                                          | No CS in preceding 2wk                                                                 |                                                    | group had clinical deterioration, either in the emergency department or after discharge. One patient in the placebo group had a burning sensation on the face.                                                                        |
| Klassen 1996<br>Canada<br>Non-industry funded | RCT<br>Pediatric ED<br>1 | Croup<br>3m-5y  | 1)<br>Dexamethasone 0.6mg/kg (oral) + budesonide 2.0mg (4ml) (neb), n=25<br>2)<br>Dexamethasone 0.6mg/kg (oral) + placebo saline 0.9% (4ml) (neb), n=25 | Racemic epinephrine & croup tent<br><br>No CS in preceding 2 weeks                     | Baseline & hourly for 4h;<br>FU 1wk                | Two patients in the budesonide group and 1 patient in the placebo group vomited their initial doses of dexamethasone within 30min and required readministration of dexamethasone, which was subsequently tolerated in all 3 patients. |
| Klassen 1998<br>Canada<br>Non-industry funded | RCT<br>Pediatric ED<br>2 | Croup<br>3mo-5y | 1) Budesonide 2.0mg (4ml) (neb) + placebo syrup (oral), n=65<br>2)<br>Dexamethasone 0.6mg/kg (oral) + placebo saline 4ml (neb), n=69                    | Epinephrine, supplemental glucocorticoids & mist therapy<br><br>No CS in preceding 2wk | Baseline & hourly for 4h;<br>FU 1wk post-enrolment | All parents were asked about the presence of oral thrush and only 1 parent whose child was in the budesonide group                                                                                                                    |

|                               |                                          |                      |                                                                                                                                                                                                                                     |                              |                                                                                                       |                                                                                                                                                                                                                                                                                                                            |
|-------------------------------|------------------------------------------|----------------------|-------------------------------------------------------------------------------------------------------------------------------------------------------------------------------------------------------------------------------------|------------------------------|-------------------------------------------------------------------------------------------------------|----------------------------------------------------------------------------------------------------------------------------------------------------------------------------------------------------------------------------------------------------------------------------------------------------------------------------|
|                               |                                          |                      | 3) Budesonide 2.0mg (4ml) (neb) + dexamethasone 0.6mg/kg (oral), n=64                                                                                                                                                               |                              |                                                                                                       | reported this condition at the 1-week follow-up. Parents of 1 patient treated with dexamethasone reported hives, and parents of 1 patient treated with dexamethasone reported violent behavior. Parents of 1 patient who had received budesonide and dexamethasone reported their child to be more hyperactive than usual. |
| Kuyucu 2004 Turkey Funding NR | RCT Pediatric outpatient clinic and ED 1 | Bronchiolitis 2-21mo | 1) Epinephrine 3ml of 1:1000 solution for 10min (neb) + dexamethasone 0.6mg/kg, single dose (IM), n=23<br>2) Sal 0.15mg/kg of 1mg/ml solution added to 0.9% saline for 10min (neb) + dexamethasone 0.6mg/kg, single dose (IM), n=23 | NR<br>No CS in preceding 2wk | Baseline, 30min, 60min, 90min & 120min, then 24h, 5d; FU by regular hospital visits in subsequent 2mo | No side-effects such as pallor, vomiting or tremor were encountered in the patients.                                                                                                                                                                                                                                       |

|                                 |                                                     |                |                                                                                                                                                                                                                                       |                                                                                    |                                                                                                                                                                                                                                               |                                                                                                                                                                                                                                                                                                                                  |
|---------------------------------|-----------------------------------------------------|----------------|---------------------------------------------------------------------------------------------------------------------------------------------------------------------------------------------------------------------------------------|------------------------------------------------------------------------------------|-----------------------------------------------------------------------------------------------------------------------------------------------------------------------------------------------------------------------------------------------|----------------------------------------------------------------------------------------------------------------------------------------------------------------------------------------------------------------------------------------------------------------------------------------------------------------------------------|
|                                 |                                                     |                | <p>3) Epinephrine<br/>3ml of 1:1000 solution for 10min (neb) + placebo saline, single dose (IM), n=11</p> <p>4) Sal<br/>0.15mg/kg (1mg/ml solution added to 0.9% saline) for 10min (neb) + placebo saline, single dose (IM), n=12</p> |                                                                                    |                                                                                                                                                                                                                                               |                                                                                                                                                                                                                                                                                                                                  |
| Lai 2005<br>China<br>Funding NR | RCT<br>Hospital<br>pediatric<br>inpatient ward<br>1 | Asthma<br>1-5y | <p>1) Budesonide<br/>0.05mg/kg every 12h (neb), n=9</p> <p>2) Dexamethasone<br/>0.1mg/kg every 8h (neb), n=9</p> <p>Multiple courses over 8-19mo</p>                                                                                  | <p>Terbutaline (as needed)<br/>0.25mg/kg every 6h to a max. of 5.0mg</p> <p>NR</p> | <p>On admission, at discharge &amp; at follow-up;</p> <p>Growth (mean height) assessed (assessment method NR) at baseline and approximately 8-19mo after randomization;</p> <p>Adrenal suppression assessed from blood pressure (systolic</p> | <p>The measures of blood pressure (systolic and diastolic), blood glucose and serum potassium revealed no significant changes between admission and discharge in either group of patients (Table 3). Thus, there were no adverse effects in these patients. Table 4 also shows that there were no significant differences in</p> |

|                                  |                |              |                                                                                                                                                                                                                                           |                                                           |                                                                                           |                                                                                                                                                                                                                                                                                                                                                       |
|----------------------------------|----------------|--------------|-------------------------------------------------------------------------------------------------------------------------------------------------------------------------------------------------------------------------------------------|-----------------------------------------------------------|-------------------------------------------------------------------------------------------|-------------------------------------------------------------------------------------------------------------------------------------------------------------------------------------------------------------------------------------------------------------------------------------------------------------------------------------------------------|
|                                  |                |              |                                                                                                                                                                                                                                           |                                                           | and diastolic) and blood glucose at baseline and approximately 8-19mo after randomization | total height growth, mean rate of height increase, systolic or diastolic blood pressure, or blood glucose between the treatment groups.                                                                                                                                                                                                               |
| Langton Hewer 1998 UK Funding NR | RCT Hospital 1 | Asthma 1-15y | 1) Prednisolone 0.5mg/kg/day until discharge (max. 60.0mg/day) (oral), n=35<br>2) Prednisolone 1.0mg/kg/day until discharge (max. 60.0mg/day) (oral), n=33<br>3) Prednisolone 2.0mg/kg/day until discharge (max. 60.0mg/day) (oral), n=30 | Bronchodilators (nebulized)<br><br>No CS in preceding 14d | Baseline, 0h, 12h, 24h, 36h, 48h, 60h & 72h; FU 2wks post-enrollment                      | No serious short-term side-effects were noted but hyperactivity related to nebulized B2 agonist therapy was seen. No side-effect possibly attributable to prednisolone therapy was noted in any of the three treatment groups. Three children in prednisolone 2.0mg group were withdrawn because of vomiting, a diagnosis of pneumonia or the parents |

|                                       |                                               |                        |                                                                                                                                                                                                    |                                                         |                         |                                                                                                                                                                                                                                         |
|---------------------------------------|-----------------------------------------------|------------------------|----------------------------------------------------------------------------------------------------------------------------------------------------------------------------------------------------|---------------------------------------------------------|-------------------------|-----------------------------------------------------------------------------------------------------------------------------------------------------------------------------------------------------------------------------------------|
|                                       |                                               |                        |                                                                                                                                                                                                    |                                                         |                         | withdrew consent.                                                                                                                                                                                                                       |
| Lee 2001<br>Taiwan<br>Funding NR      | Case report<br>Pediatric clinic of hospital 1 | Asthma<br>5y           | 1) Terbutaline solution (loading dose: 5.0mg/kg/dose, maintaining dose: 0.6mg/kg/h); Methylprednisolone (BW 21kg, 2.0mg/kg/dose, 40.0mg every 6h) (IV), and; Procaterol 12.5mcg twice daily (oral) | NR                                                      | D1 to D3                | On day 3 of admission the patient was found to have major behaviour changes and hyperventilation. She started screaming unreasonably, gazing forward and sometimes upward and became panic. She had visual hallucinations and delusion. |
| Leer 1969<br>USA<br>Industry funded   | RCT<br>Hospital 5                             | Bronchiolitis<br><30mo | 1) Betamethasone, 1.0mg/5lb first dose and 0.5mg/5lb every 12h (total 3.5mg/5lb (6 doses) for 72h) (IM/IV), n=148<br>2) Aqueous vehicle, 5cc every 12h for 72h for total 6 doses (IM/IV), n=149    | Mist, oxygen, parenteral fluids & antibiotics<br><br>NR | Clinical signs every 6h | There were no detrimental corticosteroid effects in any of the patients. The corticosteroid neither increased the incidence of staphylococcal or other bacterial pneumonias nor masked superinfections.                                 |
| Lehmann 2008<br>Germany<br>Funding NR | Case report<br>Pediatric                      | Asthma<br>2y           | 1) Prednisolone-21-hydrogen                                                                                                                                                                        | None<br><br>3wk washout period (but                     | Post skin prick test    | Patient had been on well-tolerated long-term                                                                                                                                                                                            |

|    |          |  |                 |               |  |                 |
|----|----------|--|-----------------|---------------|--|-----------------|
| 1  |          |  |                 |               |  |                 |
| 2  |          |  |                 |               |  |                 |
| 3  |          |  |                 |               |  |                 |
| 4  | Allergol |  | succinate (PSH) | under long-   |  | therapy of      |
| 5  | ogy      |  | 50.0mg (IV)     | term          |  | 100mcg          |
| 6  | Clinic   |  | 2) Prednisone   | maintenance   |  | inhaled         |
| 7  | 1        |  | (100.0mg,       | therapy of    |  | fluticasone     |
| 8  |          |  | suppository)    | daily 100mcg  |  | dipropionate    |
| 9  |          |  | 3)              | fluticasone   |  | daily for       |
| 10 |          |  | Betamethasone   | propionate    |  | frequently      |
| 11 |          |  | (dose NR, oral) | (inhaled) and |  | recurring       |
| 12 |          |  | 4)              | intermittent  |  | episodes of     |
| 13 |          |  | Dexamethasone   | prednisone    |  | asthmatic       |
| 14 |          |  | (dose NR, IV)   | suppositories |  | exacerbations   |
| 15 |          |  |                 |               |  | , with          |
| 16 |          |  |                 |               |  | intermittent    |
| 17 |          |  |                 |               |  | prednisone      |
| 18 |          |  |                 |               |  | suppositories   |
| 19 |          |  |                 |               |  | for acute       |
| 20 |          |  |                 |               |  | bronchopulm     |
| 21 |          |  |                 |               |  | onary           |
| 22 |          |  |                 |               |  | obstruction     |
| 23 |          |  |                 |               |  | with no         |
| 24 |          |  |                 |               |  | occurrence of   |
| 25 |          |  |                 |               |  | adverse         |
| 26 |          |  |                 |               |  | events and no   |
| 27 |          |  |                 |               |  | other           |
| 28 |          |  |                 |               |  | glucocorticoid  |
| 29 |          |  |                 |               |  | preparations.   |
| 30 |          |  |                 |               |  | Patient was     |
| 31 |          |  |                 |               |  | admitted to     |
| 32 |          |  |                 |               |  | department      |
| 33 |          |  |                 |               |  | due to severe   |
| 34 |          |  |                 |               |  | bronchospas     |
| 35 |          |  |                 |               |  | m (neither      |
| 36 |          |  |                 |               |  | bronchodilato   |
| 37 |          |  |                 |               |  | rs nor rectally |
| 38 |          |  |                 |               |  | administered    |
| 39 |          |  |                 |               |  | prednisone      |
| 40 |          |  |                 |               |  | provided        |
| 41 |          |  |                 |               |  | symptom         |
| 42 |          |  |                 |               |  | relief) and     |
| 43 |          |  |                 |               |  | given 50mg of   |
| 44 |          |  |                 |               |  | prednisolone-   |
| 45 |          |  |                 |               |  | 21-hydrogen     |
| 46 |          |  |                 |               |  | succinate       |
| 47 |          |  |                 |               |  | intravenously.  |
| 48 |          |  |                 |               |  |                 |
| 49 |          |  |                 |               |  |                 |
| 50 |          |  |                 |               |  |                 |
| 51 |          |  |                 |               |  |                 |
| 52 |          |  |                 |               |  |                 |
| 53 |          |  |                 |               |  |                 |
| 54 |          |  |                 |               |  |                 |
| 55 |          |  |                 |               |  |                 |
| 56 |          |  |                 |               |  |                 |
| 57 |          |  |                 |               |  |                 |
| 58 |          |  |                 |               |  |                 |
| 59 |          |  |                 |               |  |                 |
| 60 |          |  |                 |               |  |                 |

|  |  |  |  |  |  |                                                                                                                                                                                                                                                                                                                                                                                                                                                                            |
|--|--|--|--|--|--|----------------------------------------------------------------------------------------------------------------------------------------------------------------------------------------------------------------------------------------------------------------------------------------------------------------------------------------------------------------------------------------------------------------------------------------------------------------------------|
|  |  |  |  |  |  | <p>Within a few minutes the boy developed generalized urticaria, facial angio-oedema, nausea and severe dyspnea requiring nasal oxygen supplementation. Medication was interrupted and symptoms spontaneously resolved within 30 minutes. Testing with PSH at a dilution of 1:10 elicited a positive result (wheal diameter 6 mm), whereas no reactions were observed to prednisone, betamethasone or dexamethasone. An oral provocation test with betamethasone and a</p> |
|--|--|--|--|--|--|----------------------------------------------------------------------------------------------------------------------------------------------------------------------------------------------------------------------------------------------------------------------------------------------------------------------------------------------------------------------------------------------------------------------------------------------------------------------------|



|                                      |                            |                          |                                                                                                                                                                                                                                                                                                                                                                                                                   |                                                                              |                                  |                                                                                                                                                                                                              |
|--------------------------------------|----------------------------|--------------------------|-------------------------------------------------------------------------------------------------------------------------------------------------------------------------------------------------------------------------------------------------------------------------------------------------------------------------------------------------------------------------------------------------------------------|------------------------------------------------------------------------------|----------------------------------|--------------------------------------------------------------------------------------------------------------------------------------------------------------------------------------------------------------|
|                                      |                            |                          |                                                                                                                                                                                                                                                                                                                                                                                                                   |                                                                              |                                  | titrated intravenous dexamethasone challenge test were tolerated without any complications.                                                                                                                  |
| Leipzig<br>1979<br>USA<br>Funding NR | RCT<br>Hospital<br>1<br>2  | Croup<br>8mo-5y          | 1)<br>Dexamethasone<br>0.3mg/kg<br>(4mg/ml) 2<br>doses 2h apart<br>(IM), n=16<br>2) Placebo<br>saline, two<br>doses 2h apart<br>(IM), n=14                                                                                                                                                                                                                                                                        | Vaponephrine<br>, mist tent<br>therapy &<br>racemic<br>epinephrine<br><br>NR | Baseline,<br>12h & 24h<br><br>NR | We observed<br>no adverse<br>effects or late<br>relapses.                                                                                                                                                    |
| Lin 1991<br>Taiwan<br>Funding NR     | NRCT<br>Hospital<br>1<br>1 | Acute<br>wheeze<br><36mo | 1) Group A:<br><12mo old<br>(n=29):<br>hydrocortisone<br>5.0mg/kg<br>loading dose<br>(IV) plus<br>2.5mg/kg/dose<br>every 6h for 3d<br>+ meptin liquid<br>(procaterol<br>hydrochloride)<br>1.25mcg/kg/dose<br>on admission,<br>then twice daily<br>(oral)<br>2) Group B:<br>>12mo old<br>(n=23):<br>hydrocortisone<br>5.0mg/kg<br>loading dose<br>(IV) plus<br>2.5mg/kg/dose<br>every 6h for 3d<br>+ meptin liquid | IV fluid,<br>oxygen &<br>antibiotics<br><br>NR                               | Daily for 5d                     | Regarding<br>side effects,<br>two patients<br>in Group B<br>and one<br>patient each<br>in Groups A<br>and C had<br>tremor. One<br>patient in<br>Group A had<br>irritability,<br>and another<br>had diarrhea. |

|                                           |                                                   |                         |                                                                                                                                         |                                     |                                |                                                                                                                                                                                                                                                                 |
|-------------------------------------------|---------------------------------------------------|-------------------------|-----------------------------------------------------------------------------------------------------------------------------------------|-------------------------------------|--------------------------------|-----------------------------------------------------------------------------------------------------------------------------------------------------------------------------------------------------------------------------------------------------------------|
|                                           |                                                   |                         | (procaterol hydrochloride) 1.25mcg/kg/dose on admission, then twice daily (oral)<br>3) Group C: No hydrocortisone or procaterol (n=28)  |                                     |                                |                                                                                                                                                                                                                                                                 |
| Lucas-Bouwman 2001 Netherlands Funding NR | RCT Hospital 1                                    | Asthma 3mo-8y (mean 2y) | 1) Prednisolone 1.0mg/kg tablets, twice daily for 5d (oral), n=NR<br>2) Prednisolone 1.0mg/kg solution, twice daily for 5d (oral), n=NR | Bronchodilators (inhaled)<br><br>NR | 6d to 8d after index visit     | Vomiting was observed in 23% of patients using crushed tablets, and in none of the patients on oral solution.                                                                                                                                                   |
| Nahum 2009 Israel Funding NR              | Case series (n=3, 1 case relevant) Pediatric ED 1 | Asthma 5y               | 1) Methylprednisolone 2.0mg/kg for 2d (IV)                                                                                              | NR                                  | D1 & D2; FU 3mo post-discharge | He presented with wheezing, received an intravenous bolus of methylprednisolone sodium succinate (2mg/kg), and immediately developed restlessness and facial rash which resolved spontaneously. On the following day, he received again the same medication and |

|                                      |                                          |                |                                                                                                                                                                                                     |                                       |                                                                                      |                                                                                                                                                                                                                              |
|--------------------------------------|------------------------------------------|----------------|-----------------------------------------------------------------------------------------------------------------------------------------------------------------------------------------------------|---------------------------------------|--------------------------------------------------------------------------------------|------------------------------------------------------------------------------------------------------------------------------------------------------------------------------------------------------------------------------|
|                                      |                                          |                |                                                                                                                                                                                                     |                                       |                                                                                      | immediately developed respiratory distress and cyanosis with oxygen desaturation of 89%. He recovered with oxygen supplementation and was treated afterward with oral betamethasone sodium phosphate without adverse events. |
| Paniagua 2016 Spain Funding NR       | RCT (conference abstract) Pediatric ED 1 | Asthma >12mo   | 1) Dexamethasone, NR, 2 doses (oral), n=287<br>2) Prednisone/prednisolone, NR, 5d (NR), n=290                                                                                                       | NR<br>NR                              | NR; FU at 7d & 15d post-ED visit                                                     | No differences were found regarding vomits (2.1% vs 4.1%).                                                                                                                                                                   |
| Panickar 2009 UK Non-industry funded | RCT Pediatric ED 3                       | Wheeze 10-60mo | 1) Prednisolone 10.0mg/day (10ml) once daily for 10-24mo old (oral); 20.0mg/day (10ml) once daily for >24mo old (oral), for 5d, n=343<br>2) Placebo solution (10ml) once daily for 5d (oral), n=344 | Albuterol, oxygen & antibiotics<br>NR | 4h, 12h & 24h after albuterol & daily post-discharge; FU by phone 1mo post-discharge | No clinically significant adverse events were reported to the patient safety committee. In one child in the prednisolone group, parents attributed excess                                                                    |

|                                      |                                                             |                                                                                                                      |                                                                 |          |    |                                                                                                                                                                                                                                                                                                                                                                                                        |
|--------------------------------------|-------------------------------------------------------------|----------------------------------------------------------------------------------------------------------------------|-----------------------------------------------------------------|----------|----|--------------------------------------------------------------------------------------------------------------------------------------------------------------------------------------------------------------------------------------------------------------------------------------------------------------------------------------------------------------------------------------------------------|
|                                      |                                                             |                                                                                                                      |                                                                 |          |    | vomiting to the study drug and discontinued the medication after discharge from hospital.                                                                                                                                                                                                                                                                                                              |
| Panigada 2014<br>Italy<br>Funding NR | Case report<br>Pediatric<br>Pulmonary and Allergy Unit<br>1 | Progressive shortness of breath, subsequent diagnosis of inflammatory myofibroblastic tumor cell proliferation<br>5y | Albuterol (inhaled) + prednisone 1.0mg/kg (28.70kg) (oral), n=1 | NR<br>NR | NR | The child was sent home on inhaled albuterol and prednisone to be tapered and discontinued after 7-10 days. Fifteen days after first presentation, 1 day after the discontinuation of prednisone, the boy was readmitted because of progressive shortness of breath. He had moderate-to-severe dyspnoea, inspiratory, and expiratory wheezes: SaO <sub>2</sub> was 97% in room air, RR 39 breaths/min. |

1  
2  
3  
4  
5  
6  
7  
8  
9  
10  
11  
12  
13  
14  
15  
16  
17  
18  
19  
20  
21  
22  
23  
24  
25  
26  
27  
28  
29  
30  
31  
32  
33  
34  
35  
36  
37  
38  
39  
40  
41  
42  
43  
44  
45  
46  
47  
48  
49  
50  
51  
52  
53  
54  
55  
56  
57  
58  
59  
60

|  |  |  |  |  |  |                                                                                                                                                                                                                                                                                                                                                                                                                                                                                                           |
|--|--|--|--|--|--|-----------------------------------------------------------------------------------------------------------------------------------------------------------------------------------------------------------------------------------------------------------------------------------------------------------------------------------------------------------------------------------------------------------------------------------------------------------------------------------------------------------|
|  |  |  |  |  |  | <p>Spirometry demonstrated to significant changes in FVC (1.43L), a decrease in FEV1 (1.29L) and a "box-shaped" flow/volume loop, consistent with fixed large airway obstruction. A computed tomography (CT) scan showed an endoluminal mass in the superior portion of the trachea, 15mm from glottis, nearly completely occluding the lumen. Tracheostomy was performed, followed by bronchoscopy . Histological examination of the biopsies showed spindle cells surrounded by collagenous stroma,</p> |
|--|--|--|--|--|--|-----------------------------------------------------------------------------------------------------------------------------------------------------------------------------------------------------------------------------------------------------------------------------------------------------------------------------------------------------------------------------------------------------------------------------------------------------------------------------------------------------------|

For peer review only

|                                                                       |                              |                                   |                                                                                                                                                                                                                                                                                                   |                                                                                                   |                                                                                                                                             |                                                                                                                                                                                                                                                                                                             |
|-----------------------------------------------------------------------|------------------------------|-----------------------------------|---------------------------------------------------------------------------------------------------------------------------------------------------------------------------------------------------------------------------------------------------------------------------------------------------|---------------------------------------------------------------------------------------------------|---------------------------------------------------------------------------------------------------------------------------------------------|-------------------------------------------------------------------------------------------------------------------------------------------------------------------------------------------------------------------------------------------------------------------------------------------------------------|
|                                                                       |                              |                                   |                                                                                                                                                                                                                                                                                                   |                                                                                                   |                                                                                                                                             | displaying strong positivity for vimentin, focal positivity for a-smooth muscle actin, and weak positivity for clusterin. No desmin, ALK, S100, CD21, and CD 23 expression was detected. A diagnosis of IMT of the trachea was performed and a complete surgical resection of the neoplasm was carried out. |
| Plint 2009<br>Canada<br>Non-<br>industry<br>and<br>industry<br>funded | RCT<br>Pediatri<br>c ED<br>8 | Bronchiol<br>itis<br>6wk-<br>12mo | 1) Epinephrine<br>3ml 1:1000, 2<br>doses 30min<br>apart (neb) +<br>dexamethasone<br>1.0mg/kg (max<br>10mg) in ED<br>plus 5 once-<br>daily<br>0.6mg/kg/dose,<br>total 6d (oral),<br>n=200<br>2) Epinephrine<br>3ml 1:1000, 2<br>doses 30min<br>apart (neb) +<br>placebo, total<br>6d (oral), n=199 | Bronchodilato<br>rs (albuterol,<br>epinephrine)<br>& antibiotics<br><br>No CS in<br>preceding 2wk | Baseline to<br>30min,<br>60min,<br>120min &<br>240min;<br>FU daily<br>until D7,<br>then every<br>2d until<br>D14 &<br>every 3d<br>until D22 | Adverse<br>events were<br>uncommon<br>(see<br>Supplementar<br>y Appendix).<br>Pallor was<br>reported in 76<br>infants (9.5%),<br>tremor in 15<br>(1.9%), and<br>vomiting in 14<br>(1.8%), with<br>no significant<br>differences<br>among the<br>groups. One<br>hospitalized                                 |

|                             |                |               |                                                                                                                                                                                                           |                                                                                              |                          |                                                                                                                                                                                                                                                                                                                                                                                                                                                          |
|-----------------------------|----------------|---------------|-----------------------------------------------------------------------------------------------------------------------------------------------------------------------------------------------------------|----------------------------------------------------------------------------------------------|--------------------------|----------------------------------------------------------------------------------------------------------------------------------------------------------------------------------------------------------------------------------------------------------------------------------------------------------------------------------------------------------------------------------------------------------------------------------------------------------|
|                             |                |               | <p>3) Placebo 2 doses 30min apart (neb) + dexamethasone 1.0mg/kg (max 10mg), total 6d (oral), n=200</p> <p>4) Placebo 2 doses 30min apart (neb) + Placebo solution (max 12ml), total 6d (oral), n=201</p> |                                                                                              |                          | <p>infant in group 2 and one in group 3 had mild, transient hypertension, which resolved rapidly.</p> <p>Supplementary table: side effects and adverse events, n (Epi + Dex vs. Epi vs. Dex vs. Placebo): Tremor (4 vs. 4 vs. 5 vs. 2); Pallor (23 vs. 22 vs. 15 vs. 16); Vomiting (2 vs. 4 vs. 5 vs. 3); Varicella (0 in all groups); Dark stools (17 vs. 14 vs. 12 vs. 16); Hypertension (0 vs. 1 vs. 1 vs. 0); Hyperkalemia (0 vs. 0 vs. 1 vs. 0)</p> |
| Razi 2015 Turkey Funding NR | RCT Hospital 1 | Asthma 7-72mo | <p>1) Budesonide 1.0mg/2ml, 2 doses for up to 5d, n=50</p> <p>2) Sterile saline 2ml, 2 doses for up to 5d, n=50</p>                                                                                       | Standard care: methylprednisolone 1.0mg/kg/day, for up to 5d (IV) + sal 0.15mg/kg every 4h + | Every 4h until discharge | No drug-related adverse effects were identified during hospitalization.                                                                                                                                                                                                                                                                                                                                                                                  |

|                                        |                                       |              |                                                                                                                                                             |                                     |                                                                                                                          |                                                                                                                                                                                                                                                                                                                                                                                                                                                     |
|----------------------------------------|---------------------------------------|--------------|-------------------------------------------------------------------------------------------------------------------------------------------------------------|-------------------------------------|--------------------------------------------------------------------------------------------------------------------------|-----------------------------------------------------------------------------------------------------------------------------------------------------------------------------------------------------------------------------------------------------------------------------------------------------------------------------------------------------------------------------------------------------------------------------------------------------|
|                                        |                                       |              |                                                                                                                                                             | ipratropium bromide 250mcg every 6h |                                                                                                                          |                                                                                                                                                                                                                                                                                                                                                                                                                                                     |
|                                        |                                       |              |                                                                                                                                                             | NR                                  |                                                                                                                          |                                                                                                                                                                                                                                                                                                                                                                                                                                                     |
| Roberts 1999 Australia Industry funded | RCT Women's and Children's Hospital 1 | Croup 6mo-8y | 1) Budesonide 2.0mg (4ml) for 10min each dose, every 12h (max. 4 doses) (neb), n=42<br>2) Placebo for 10min each dose, every 12h (max. 4 doses) (neb), n=40 | NR<br><br>No CS in preceding 4wk    | Baseline, 2h, 6h & 12h after first dose, then 12-hourly up to 48h if in hospital; FU by telephone 1d & 3d post-discharge | The adverse effects in both groups were attributable to either manifestations of the disease state or the mode of drug administration (Table 3). Four patients (3 placebo, 1 budesonide) experienced an exacerbation in symptoms to the point of causing interventional treatment mode outside of the protocol nebulised adrenaline). These exacerbations occurred shortly after beginning nebulisation and were apparently induced due to distress |



1  
2  
3  
4  
5  
6  
7  
8  
9  
10  
11  
12  
13  
14  
15  
16  
17  
18  
19  
20  
21  
22  
23  
24  
25  
26  
27  
28  
29  
30  
31  
32  
33  
34  
35  
36  
37  
38  
39  
40  
41  
42  
43  
44  
45  
46  
47  
48  
49  
50  
51  
52  
53  
54  
55  
56  
57  
58  
59  
60

|  |  |  |  |  |  |                                                                                                                                                                                                                                                                                                                                                                                                                                                                                                           |
|--|--|--|--|--|--|-----------------------------------------------------------------------------------------------------------------------------------------------------------------------------------------------------------------------------------------------------------------------------------------------------------------------------------------------------------------------------------------------------------------------------------------------------------------------------------------------------------|
|  |  |  |  |  |  | caused by using the nebuliser mask. All four of these patients had severe croup symptoms (croup score $\geq 8$ ) at the time of nebulisation. The nebuliser mask was poorly accepted in up to 18% of patients in this study if the four exacerbations were considered to be mediated by nebuliser-induced emotional distress. Table 3 adverse effect profile, n (Bud vs. placebo): Emotional distress (5 vs. 6); Vomiting (2 vs. 3); Rash (0 vs. 2); Eye irritation (1 vs. 1); Irritated tongue (0 vs. 1) |
|--|--|--|--|--|--|-----------------------------------------------------------------------------------------------------------------------------------------------------------------------------------------------------------------------------------------------------------------------------------------------------------------------------------------------------------------------------------------------------------------------------------------------------------------------------------------------------------|

For peer review only

|                                                                                                                                                                            |                                                        |                                                               |                            |                                                                                                                                                        |                                                            |                                                              |                                                                                                                                                                                                                                                                                                                                         |
|----------------------------------------------------------------------------------------------------------------------------------------------------------------------------|--------------------------------------------------------|---------------------------------------------------------------|----------------------------|--------------------------------------------------------------------------------------------------------------------------------------------------------|------------------------------------------------------------|--------------------------------------------------------------|-----------------------------------------------------------------------------------------------------------------------------------------------------------------------------------------------------------------------------------------------------------------------------------------------------------------------------------------|
| 1<br>2<br>3<br>4<br>5<br>6<br>7<br>8<br>9<br>10<br>11<br>12                                                                                                                | Roorda<br>1998<br>Netherlands<br>Funding NR            | RCT<br>Hospital<br>NR                                         | Croup<br>4-52mo            | 1) Fluticasone<br>propionate<br>1000mcg, 2<br>divided doses<br>30min apart<br>(MDI), n=9<br>2) Placebo (NR),<br>n=8                                    | NR<br><br>No CS in<br>preceding 48h                        | Admission,<br>30min, 2h,<br>6h, 12h &<br>24h                 | No side<br>effects of the<br>treatment<br>regimens<br>were reported<br>during the<br>study.                                                                                                                                                                                                                                             |
| 13<br>14<br>15<br>16<br>17<br>18<br>19<br>20<br>21<br>22<br>23<br>24<br>25<br>26<br>27<br>28                                                                               | Roosevelt<br>1996<br>USA<br>Non-<br>industry<br>funded | RCT<br>ED<br>1                                                | Bronchiol<br>itis<br><12mo | 1)<br>Dexamethasone<br>1.0mg/kg every<br>24h for max. 3<br>doses (IM),<br>n=65<br>2) Placebo<br>saline, every<br>24h for max. 3<br>doses (IM),<br>n=53 | Antibiotics,<br>bronchodilato<br>rs & tribavirin<br><br>NR | Admission<br>& every<br>12h;<br>FU 1wk<br>post-<br>discharge | Three<br>patients had<br>occult blood<br>in their stools;<br>two were in<br>the<br>dexamethaso<br>ne group. No<br>episodes of<br>gross<br>haematochezi<br>a were<br>observed.                                                                                                                                                           |
| 29<br>30<br>31<br>32<br>33<br>34<br>35<br>36<br>37<br>38<br>39<br>40<br>41<br>42<br>43<br>44<br>45<br>46<br>47<br>48<br>49<br>50<br>51<br>52<br>53<br>54<br>55<br>56<br>57 | Sadowitz<br>2012<br>USA<br>Funding NR                  | Case<br>series<br>(n=4, 1<br>case<br>relevan<br>t)<br>ED<br>1 | Pharyngit<br>is<br>3y      | Dexamethasone<br>10.0mg single<br>dose (oral?) +<br>acetaminophe<br>n + amoxicillin,<br>n=1                                                            | NR<br><br>NR                                               | NR                                                           | The patient<br>was given a<br>10-mg dose of<br>dexamethaso<br>ne in addition<br>to<br>acetaminophe<br>n and<br>amoxicillin;<br>she was able<br>to tolerate<br>liquids and<br>was<br>discharged.<br>The patient<br>returned to<br>the ED 2 days<br>later with<br>persistent<br>complaints of<br>fever and sore<br>throat, now<br>with an |

1  
2  
3  
4  
5  
6  
7  
8  
9  
10  
11  
12  
13  
14  
15  
16  
17  
18  
19  
20  
21  
22  
23  
24  
25  
26  
27  
28  
29  
30  
31  
32  
33  
34  
35  
36  
37  
38  
39  
40  
41  
42  
43  
44  
45  
46  
47  
48  
49  
50  
51  
52  
53  
54  
55  
56  
57  
58  
59  
60

|  |  |  |  |  |  |                                                                                                                                                                                                                                                                                                                                                                                                                                                                                                                         |
|--|--|--|--|--|--|-------------------------------------------------------------------------------------------------------------------------------------------------------------------------------------------------------------------------------------------------------------------------------------------------------------------------------------------------------------------------------------------------------------------------------------------------------------------------------------------------------------------------|
|  |  |  |  |  |  | inability to tolerate oral fluids. Pertinent physical examination findings included pulse rate of 166 beats per minutes; oral temperature of 40.3 degrees C; dry, erythematous mucous membranes with blood clots; and sores over the tonsils and posterior oropharynx. The tonsils had markedly enlarged from the previous visit. Multiple petechiae were present on the soft palate, with blood noted to be oozing from gums after throat exam. No palpable lymph nodes were found. A completed blood cell (CBC) count |
|--|--|--|--|--|--|-------------------------------------------------------------------------------------------------------------------------------------------------------------------------------------------------------------------------------------------------------------------------------------------------------------------------------------------------------------------------------------------------------------------------------------------------------------------------------------------------------------------------|

For peer review only

1  
2  
3  
4  
5  
6  
7  
8  
9  
10  
11  
12  
13  
14  
15  
16  
17  
18  
19  
20  
21  
22  
23  
24  
25  
26  
27  
28  
29  
30  
31  
32  
33  
34  
35  
36  
37  
38  
39  
40  
41  
42  
43  
44  
45  
46  
47  
48  
49  
50  
51  
52  
53  
54  
55  
56  
57  
58  
59  
60

|  |  |  |  |  |  |                                                                                                                                                                                                                                                                                                                                                                                                                                                                                                                                                           |
|--|--|--|--|--|--|-----------------------------------------------------------------------------------------------------------------------------------------------------------------------------------------------------------------------------------------------------------------------------------------------------------------------------------------------------------------------------------------------------------------------------------------------------------------------------------------------------------------------------------------------------------|
|  |  |  |  |  |  | <p>demonstrated a white blood cell (WBC) count of <math>16.4 \times 10^9/L</math> with 50% blasts on the peripheral smear, platelet count of <math>6 \times 10^9/L</math>, and hemoglobin level of 9.8 g/dL. The patient received 2 fluid boluses of normal saline and was admitted to to the pediatric intensive care unit (PICU) and intubated for airway protection because of rapidly enlarging tonsils. Bone marrow aspiration demonstrated acute lymphocytic leukemia (ALL). The patient was placed in the high-risk treatment group because of</p> |
|--|--|--|--|--|--|-----------------------------------------------------------------------------------------------------------------------------------------------------------------------------------------------------------------------------------------------------------------------------------------------------------------------------------------------------------------------------------------------------------------------------------------------------------------------------------------------------------------------------------------------------------|

For peer review only

1  
2  
3  
4  
5  
6  
7  
8  
9  
10  
11  
12  
13  
14  
15  
16  
17  
18  
19  
20  
21  
22  
23  
24  
25  
26  
27  
28  
29  
30  
31  
32  
33  
34  
35  
36  
37  
38  
39  
40  
41  
42  
43  
44  
45  
46  
47  
48  
49  
50  
51  
52  
53  
54  
55  
56  
57  
58  
59  
60

|  |  |  |  |  |  |                                                                                                                                                                                                                                                                                                                                                                                                                                                                                                                   |
|--|--|--|--|--|--|-------------------------------------------------------------------------------------------------------------------------------------------------------------------------------------------------------------------------------------------------------------------------------------------------------------------------------------------------------------------------------------------------------------------------------------------------------------------------------------------------------------------|
|  |  |  |  |  |  | dexamethasone administration before the diagnosis of ALL and in the absence of a pretreatment CBC count following the guidelines for high-risk leukemia established by the Children's Oncology Group. Induction therapy include IV daunorubicin, decadron, asparaginase, and vincristine. The patient's initial course of treatment was complicated by a ruptured duodenal ulcer with peritonitis and osteonecrosis. The patient survived these complications and achieved remission and continues on maintenance |
|--|--|--|--|--|--|-------------------------------------------------------------------------------------------------------------------------------------------------------------------------------------------------------------------------------------------------------------------------------------------------------------------------------------------------------------------------------------------------------------------------------------------------------------------------------------------------------------------|

For peer review only

|                                                    |                                                    |                               |                                                                                                                                                                                                 |                                                                                                                                      |                                                                                                                             |                                                                                                                                                                                                                                                                                                                                                                                                             |
|----------------------------------------------------|----------------------------------------------------|-------------------------------|-------------------------------------------------------------------------------------------------------------------------------------------------------------------------------------------------|--------------------------------------------------------------------------------------------------------------------------------------|-----------------------------------------------------------------------------------------------------------------------------|-------------------------------------------------------------------------------------------------------------------------------------------------------------------------------------------------------------------------------------------------------------------------------------------------------------------------------------------------------------------------------------------------------------|
|                                                    |                                                    |                               |                                                                                                                                                                                                 |                                                                                                                                      |                                                                                                                             | chemotherapy at this time.                                                                                                                                                                                                                                                                                                                                                                                  |
| Saito 2017<br>Japan<br>Funding NR                  | RCT<br>Pediatric<br>department of<br>hospital<br>1 | Asthma<br><3y                 | 1) Budesonide<br>1.0mg/dose,<br>twice daily<br>(neb), n=30<br>2) Prednisolone<br>0.5mg/kg, 3<br>times daily (IV),<br>n=20                                                                       | At admission,<br>received<br>hydrocortisone (IV) & one<br>inhalation of<br>procaterol;<br>LTRA for<br>wheezing<br>episodes<br><br>NR | Daily;<br><br>Serum<br>cortisol<br>assessed<br>(assessment<br>method<br>NR) on<br>admission<br>and D4 of<br>hospitalization | Serum cortisol<br>levels in the<br>BIS and PSL<br>groups at the<br>time of<br>admission<br>were<br>15.0mcg/dL<br>and<br>17.2mcg/dL<br>(p>0.05),<br>respectively.<br>However,<br>serum levels<br>on the fourth<br>day of<br>hospitalization<br>were<br>17.0mcg/dL<br>and<br>10.9mcg/dL,<br>with<br>significant<br>suppression in<br>the PSL group.<br>Adverse<br>events did not<br>occur in either<br>group. |
| Schuh 2008<br>Canada<br>Non-<br>industry<br>funded | RCT<br>Pediatric<br>ED<br>1                        | Bronchiolitis<br>8wk-<br>23mo | 1)<br>Dexamethasone<br>1.0mg/kg in ED<br>+ 4 doses<br>0.15mg/kg<br>starting 24h<br>later, total 5d<br>(oral), n=61<br>2)<br>Dexamethasone<br>1.0mg in ED + 4<br>doses placebo<br>syrup starting | Albuterol<br><br>Baseline<br>reports 3<br>patients with<br>prior inhaled<br>ICS                                                      | Baseline,<br>D4 & D6<br>(home<br>visits);<br>FU by<br>telephone<br>on D28                                                   | The mean<br>blood<br>pressure<br>increased<br>from 96.1+/-<br>8.8 mmHg to<br>99.5+/-14.8<br>mmHg in the<br>single-dose<br>group and<br>from 96.4+/-<br>7.9 mmHg to<br>103+/-                                                                                                                                                                                                                                |

|                                            |                              |               |                                                                                                                                                                                                                                                                                                      |                                                                                                                                                 |          |                                                                                                                                                                                                                                                                                                                                                                                                                          |
|--------------------------------------------|------------------------------|---------------|------------------------------------------------------------------------------------------------------------------------------------------------------------------------------------------------------------------------------------------------------------------------------------------------------|-------------------------------------------------------------------------------------------------------------------------------------------------|----------|--------------------------------------------------------------------------------------------------------------------------------------------------------------------------------------------------------------------------------------------------------------------------------------------------------------------------------------------------------------------------------------------------------------------------|
|                                            |                              |               | 24h later, total<br>5d (oral), n=64                                                                                                                                                                                                                                                                  |                                                                                                                                                 |          | 16.8mmHg in<br>the multiple<br>dose group.<br>Bag urine was<br>obtained on<br>day 6 visit in<br>47 study<br>infants and<br>tested<br>positive for<br>glucose in 1<br>child<br>belonging to<br>the multiple-<br>dose group.                                                                                                                                                                                               |
| Schuh 2009<br>Canada<br>Industry<br>funded | RCT<br>Pediatri<br>c ED<br>1 | Asthma<br>≥2y | 1) Montelukast<br>1.0mg/kg;<br>2-5y=4.0mg;<br>6-14y=5.0mg;<br>and,<br>15-17y=10.0mg<br>at 24h, 48h,<br>72h, 96h & 120h<br>(oral), n=67<br>2)<br>Prednisone/pre<br>dnisolone<br>1.0mg/kg: 2-<br>5y=4.0mg;<br>6-14y=5.0mg;<br>and 15-<br>17y=10.0mg at<br>24h, 48h, 72h,<br>96h & 120h<br>(oral), n=63 | Albuterol &<br>fluticasone<br><br>>1 single dose<br>or oral<br>prednisolone<br>or >250mcg<br>per day of<br>inhaled<br>fluticasone<br>within 72h | 48h & D8 | In the<br>montelukast<br>group,<br>adverse<br>effects<br>developed in<br>3 patients.<br>One patient<br>experienced<br>facial swelling<br>of unknown<br>etiology at 96<br>hours,<br>another<br>patient had<br>vomiting and<br>diarrhea at 72<br>hours, and<br>the third<br>patient<br>complained of<br>abdominal<br>and leg pains<br>on day 4.<br>None of these<br>patients<br>required<br>treatment for<br>these events, |

|                                          |                                           |                                                    |                                                                                                                                   |                                   |                                                                     |                                                                                                                                                                                                                                                                                                                                            |
|------------------------------------------|-------------------------------------------|----------------------------------------------------|-----------------------------------------------------------------------------------------------------------------------------------|-----------------------------------|---------------------------------------------------------------------|--------------------------------------------------------------------------------------------------------------------------------------------------------------------------------------------------------------------------------------------------------------------------------------------------------------------------------------------|
|                                          |                                           |                                                    |                                                                                                                                   |                                   |                                                                     | and the relationship between montelukast and the “event” is questionable. No adverse effects developed in the children given prednisolone after discharge.                                                                                                                                                                                 |
| Siomou 2003<br>Greece<br>Industry funded | Case control, 3-arm<br>Pediatric hospital | Bronchiolitis, viral wheezing, or croup<br>2mo-10y | 1) Hydrocortisone 10.0mg/kg/day for 3d (NR), n=28<br>2) Methylprednisolone 2.0mg/kg for 3 days (NR), n=21<br>3) Control, 3d, n=51 | NR<br><br>Never/no CS in last 2mo | Baseline, 2 days after CS administration & 12d after end of therapy | In summary, short-term IV corticosteroid administration to children suffering from acute respiratory diseases led to partial but reversible inhibition of bone formation markers, especially detectable in the >1-year-old children, without affecting the bone resorption markers. The fall in the serum phosphate levels and decrease in |



|                                                                             |                                                 |                                                       |                                                                                                                                                                 |                                                                                                                |                                                                                                                                          |                                                                                                                                                                                   |
|-----------------------------------------------------------------------------|-------------------------------------------------|-------------------------------------------------------|-----------------------------------------------------------------------------------------------------------------------------------------------------------------|----------------------------------------------------------------------------------------------------------------|------------------------------------------------------------------------------------------------------------------------------------------|-----------------------------------------------------------------------------------------------------------------------------------------------------------------------------------|
|                                                                             |                                                 |                                                       |                                                                                                                                                                 |                                                                                                                |                                                                                                                                          | the maximum renal phosphate reabsorption decrease in the maximum renal phosphate reabsorption were significant but transient.                                                     |
| Sparrow 2006<br>Australia<br>Funding NR                                     | RCT<br>Pediatri<br>c ED<br>1                    | Croup<br>mean<br>37mo<br>(28.8) vs.<br>45mo<br>(31.6) | 1)<br>Dexamethasone<br>0.2ml/kg of 0.15<br>mg/kg, single<br>dose (oral),<br>n=68<br>2) Prednisolone<br>0.2ml/kg of<br>1.0mg/kg, single<br>dose (oral),<br>n=65  | Adrenaline<br><br>No CS<br>preceding<br>study                                                                  | Enrolment,<br>30min post-<br>treatment,<br>hourly for<br>next 4h &<br>every 4h<br>until<br>discharge;<br>FU 7d-10d<br>post-<br>discharge | No adverse<br>events were<br>noted in<br>either group.                                                                                                                            |
| Stafford<br>1998<br>Australia<br>Industry<br>and non-<br>industry<br>funded | NRCT<br>Pediatri<br>c<br>hospital<br>or ED<br>1 | Asthma/c<br>roup<br>1-12y                             | 1) Prednisolone<br>5.0mg/ml<br>solution (oral),<br>n=8<br>2) PredMix<br>5.0mg/ml<br>solution (oral),<br>n=46<br>3)<br>Dexamethasone<br>5.0mg/ml (oral),<br>n=80 | NR<br><br>NR                                                                                                   | Daily                                                                                                                                    | No significant<br>differences<br>were found<br>regarding the<br>incidence of<br>nausea,<br>vomiting and<br>abdominal<br>pain, or any of<br>the objective<br>parameters<br>tested. |
| Storr 1987<br>UK<br>Non-<br>industry &<br>industry<br>funded                | RCT<br>Pediatri<br>c<br>hospital<br>1           | Asthma<br>NR (mean<br>5y)                             | 1) Prednisolone<br>30.0mg (<5yo),<br>otherwise<br>60.0mg, max.<br>dose 3.0mg/kg<br>(range 1.0-<br>3.0mg/kg) single<br>dose (oral),<br>n=67                      | Salbutamol<br>5.0mg in 2ml<br>saline (neb),<br>on admission<br>& 3 times or<br>more daily<br>when<br>indicated | Admission,<br>4h, 12h,<br>24h & 36h                                                                                                      | Prednisolone<br>has a bitter<br>aftertaste.<br>Most children<br>disliked the<br>drink. 2<br>children in<br>each group<br>vomited                                                  |

|                                                      |                                                                     |                            |                                                                                                               |                                                                                      |                                                             |                                                                                                                                                                                                                     |
|------------------------------------------------------|---------------------------------------------------------------------|----------------------------|---------------------------------------------------------------------------------------------------------------|--------------------------------------------------------------------------------------|-------------------------------------------------------------|---------------------------------------------------------------------------------------------------------------------------------------------------------------------------------------------------------------------|
|                                                      |                                                                     |                            | 2) Placebo solution identical to treatment, single dose (oral), n=73                                          | No CS in preceding 48h                                                               |                                                             | almost immediately and were consequently excluded. There were no observed side-effects related to the single prednisolone dose.                                                                                     |
| Sumboonn<br>anonda<br>1997<br>Thailand<br>Funding NR | RCT<br>Pediatri<br>c<br>hospital<br>1                               | Croup<br><5y               | 1)<br>Dexamethasone<br>0.5mg/kg/d, 3d<br>(IM/IV), n=14<br>2) Control, n=18                                    | Aerosolized<br>adrenaline,<br>antibiotics, IV<br>fluid & cool<br>mist<br><br>NR      | Admission,<br>24h & 48h;<br>FU 3wks<br>post-<br>discharge   | Complications<br>included<br>pneumonia in<br>4 controls,<br>Acinetobacter<br>sepsis in 1<br>control and<br>bacterial<br>tracheitis in 1<br>cases.                                                                   |
| Sung 1998<br>Canada<br>Non-<br>industry<br>funded    | RCT<br>Tertiary<br>pediatri<br>c<br>hospital<br>1                   | Asthma<br>>6mo or<br><18y  | 1) Budesonide<br>4000mcg (4ml),<br>single dose<br>(neb), n=24<br>2) Placebo,<br>single dose<br>(neb), n=20    | Salbutamol<br>0.15mg/kg<br>every 30min<br>for 3 doses,<br>then hourly<br>for 4 doses | Baseline,<br>discharge &<br>7d to 10d<br>post-<br>treatment | No adverse<br>effects were<br>noted in<br>either group.                                                                                                                                                             |
| Super 1989<br>USA<br>Funding NR                      | RCT<br>General<br>hospital<br>or<br>childre<br>n's<br>hospital<br>2 | Croup<br>NR (mean<br>16mo) | 1)<br>Dexamethasone<br>0.6mg/kg, single<br>dose (IM), n=16<br>2) Placebo<br>saline, single<br>dose (IM), n=13 | Mist, racemic<br>epinephrine,<br>oxygen &<br>antibiotics                             | Baseline,<br>30min, and<br>every 12h<br>until<br>discharge  | In two<br>dexamethaso<br>ne-treated<br>patients in the<br>main study,<br>including one<br>with a<br>culture-<br>positive<br>influenza A<br>viral infection,<br>laryngotrachei<br>tis progressed<br>to<br>pneumonia. |

|                                                      |                       |                                                        |                                                                                                                                                                                                                                                    |                                                   |       |                                                                                                                                                                                                                                                   |
|------------------------------------------------------|-----------------------|--------------------------------------------------------|----------------------------------------------------------------------------------------------------------------------------------------------------------------------------------------------------------------------------------------------------|---------------------------------------------------|-------|---------------------------------------------------------------------------------------------------------------------------------------------------------------------------------------------------------------------------------------------------|
|                                                      |                       |                                                        |                                                                                                                                                                                                                                                    |                                                   |       | The other patient was the one who received a second injection of dexamethasone. At the time of his second injection, he had roentgenographic evidence of pneumonia. We did not encounter any side effects directly attributable to dexamethasone. |
| Sussman<br>1964<br>USA<br>Non-<br>industry<br>funded | RCT<br>Hospital<br>NR | Bronchiolitis<br>1-25mo;<br>Laryngitis<br>15mo-<br>10y | 1)<br>Dexamethasone<br>0.1mg in divided<br>daily dose every<br>6h:<br>D1-<br>9=0.2ml/lb/day;<br>D10-<br>11=0.1ml/lb/day;<br>D12-<br>13=0.05ml/lb/day;<br>D14=0.02ml/lb/day (IM), n=31<br>2) Sodium<br>chloride<br>0.15mEq/ml for<br>14d (IM), n=26 | Oxygen,<br>penicillin &<br>streptomycin<br><br>NR | Daily | Adverse reactions to steroid therapy were not noted on clinical examination and superinfections, bacterial or viral dissemination, were not encountered.                                                                                          |

|                                             |                          |                                  |                                                                                                                                                                                                                                                                                                                                |                                                                              |               |                                                                                                                                                                                                                                                                                                                                             |
|---------------------------------------------|--------------------------|----------------------------------|--------------------------------------------------------------------------------------------------------------------------------------------------------------------------------------------------------------------------------------------------------------------------------------------------------------------------------|------------------------------------------------------------------------------|---------------|---------------------------------------------------------------------------------------------------------------------------------------------------------------------------------------------------------------------------------------------------------------------------------------------------------------------------------------------|
| Svedmyr 1995 Sweden Funding NR              | RCT, crossover NR        | Asthma 3-10y                     | <p>1) Budesonide 0.2mg 4 times daily for first 3d, 0.2mg 3 times daily for next 3d and 0.2mg twice daily for last 3d (neb), n=NR (all groups=26)</p> <p>2) Placebo (NR), n=NR (all groups=26)</p> <p>Multiple courses; 17 children completed one paired (Grp 1&amp;2) treatment; 15 children completed 4 paired treatments</p> | <p>Maintenance bronchodilators permitted</p> <p>No CS in preceding month</p> | NR            | <p>Ten adverse events were reported in the budesonide group and nine in the placebo group. There were two cases of dysphonia in the budesonide group. The other events were correlated more to the children's URTI such as headache, diarrhoea, epistaxis or sore throat. There were no significant differences between the two groups.</p> |
| Svedmyr 1999 <sup>1</sup> Sweden Funding NR | RCT Pediatric hospital 4 | Asthma – first sign of URTI 1-3y | <p>1) Budesonide 400mcg, 4 times daily for 3d then twice daily for 7d (MDI), n=28</p> <p>2) Placebo, 4 times daily for 3d then twice daily for 7d (MDI), n=27</p> <p>Multiple courses over</p>                                                                                                                                 | <p>Beta-agonists and/or theophylline</p> <p>No CS in preceding 2mo</p>       | Daily for 10d | <p>In the budesonide group a 24-month-old girl discontinued treatment during the first treatment period because of a suspected side effect. The child</p>                                                                                                                                                                                   |

1  
2  
3  
4  
5  
6  
7  
8  
9  
10  
11  
12  
13  
14  
15  
16  
17  
18  
19  
20  
21  
22  
23  
24  
25  
26  
27  
28  
29  
30  
31  
32  
33  
34  
35  
36  
37  
38  
39  
40  
41  
42  
43  
44  
45  
46  
47  
48  
49  
50  
51  
52  
53  
54  
55  
56  
57  
58  
59  
60

|  |  |  |                           |  |  |                                                                                                                                                                                                                                                                                                                                                                                                                                                                                                                            |
|--|--|--|---------------------------|--|--|----------------------------------------------------------------------------------------------------------------------------------------------------------------------------------------------------------------------------------------------------------------------------------------------------------------------------------------------------------------------------------------------------------------------------------------------------------------------------------------------------------------------------|
|  |  |  | 1yr, or max. 6 treatments |  |  | <p>became emotionally unstable and vomited after inhaling the study drug. Almost 1 y later, she used budesonide for 10 d with no side effects at all. The symptom of hoarseness, a well-known side effect with ICS, is of special interest. Nine children reported 18 episodes of hoarseness in the placebo group, compared with 2 children reporting 4 episodes in the budesonide group. This difference was statistically significant (<math>p = 0.024</math>). Figure 4 – bar chart of adverse events (counts, only</p> |
|--|--|--|---------------------------|--|--|----------------------------------------------------------------------------------------------------------------------------------------------------------------------------------------------------------------------------------------------------------------------------------------------------------------------------------------------------------------------------------------------------------------------------------------------------------------------------------------------------------------------------|

For peer review only

|                                        |                              |                     |                                                                                                                                                                                                                      |                                   |                              |                                                                                                                                                                                                                                                                           |
|----------------------------------------|------------------------------|---------------------|----------------------------------------------------------------------------------------------------------------------------------------------------------------------------------------------------------------------|-----------------------------------|------------------------------|---------------------------------------------------------------------------------------------------------------------------------------------------------------------------------------------------------------------------------------------------------------------------|
|                                        |                              |                     |                                                                                                                                                                                                                      |                                   |                              | once per treatment period), including vomiting, otitis, hoarseness, sore throat, conjunctivitis, croup, stomach ache, diarrhea, agitation, sleep disturbances, and aggressiveness.                                                                                        |
| Tagarro 2014 Spain Non-industry funded | Cohort University hospital 1 | Bronchiolitis 0-6mo | 1) Dexamethasone 1.0mg single dose, or for 6d, or 1.0mg on first day plus 0.6mg for 5d, 6d total (likely oral), n=33<br>2) Prednisone 1.0-2.0mg for 5d (likely oral), n=15<br>3) No steroids, dose/duration NR, n=32 | Adrenaline & salbutamol<br><br>NR | NR                           | No significant adverse effects attributable to steroids or bronchodilators were found in the clinical records, apart from hyperglycemia. Hyperglycemia was found in 4 out of 23 patients tested (17%). Two of them had received PRD, one of them DXM and one no steroids. |
| Tal 1983 Israel                        | RCT Hospital                 | Acute wheeze 1-12mo | 1) Dexamethasone 0.3mg/kg                                                                                                                                                                                            | Oral/IV fluid & humidified oxygen | Admission, 3h after first IM | One infant developed a remarkable                                                                                                                                                                                                                                         |

|                              |                                       |                                 |                                                                                                                                                                                                                                                                                                                                                                                                                                                                                                                                                      |          |                                           |                                                                                                                 |
|------------------------------|---------------------------------------|---------------------------------|------------------------------------------------------------------------------------------------------------------------------------------------------------------------------------------------------------------------------------------------------------------------------------------------------------------------------------------------------------------------------------------------------------------------------------------------------------------------------------------------------------------------------------------------------|----------|-------------------------------------------|-----------------------------------------------------------------------------------------------------------------|
| Non-industry funded          | 1                                     |                                 | <p>(4mg/ml) on admission + 0.1 mg/kg every 8h (IM), n=8</p> <p>2) a) Sal solution 2.5mg (0.5ml), on admission &amp; every 6h (neb);<br/>b) Sal syrup, 0.15mg/kg, every 8h (oral);<br/>and,<br/>c) Placebo saline (IM), n=8</p> <p>3) Dexamethasone 0.3mg/kg (4mg/ml) on admission + 0.1mg/kg every 8h (IM);<br/>a) Sal solution 2.5mg (0.5ml), on admission &amp; every 6h (neb);<br/>and,<br/>b) Sal syrup, 0.15mg/kg, every 8h (oral), n=8</p> <p>4) Placebo saline 0.075ml/kg on admission, then 0.025ml/kg every 8h during next 3d (IM), n=8</p> | NR       | dose & each morning (8am) until discharge | tremor as a side effect of salbutamol. No other side effects or complications of the treatment were documented. |
| Tamura 2008 Japan Funding NR | Case series Medical center, inpatient | Refractory mycoplasma pneumonia | Methylprednisolone 30.0mg/kg once daily for 3d (IV), n=1                                                                                                                                                                                                                                                                                                                                                                                                                                                                                             | NR<br>NR | NR                                        | All cases: There were no adverse events in any patients during steroid                                          |

|                                |                          |                        |                                                   |                                                   |                                                      |                                                                                                                                                                                                                                                                                                                                                                                                                                                              |
|--------------------------------|--------------------------|------------------------|---------------------------------------------------|---------------------------------------------------|------------------------------------------------------|--------------------------------------------------------------------------------------------------------------------------------------------------------------------------------------------------------------------------------------------------------------------------------------------------------------------------------------------------------------------------------------------------------------------------------------------------------------|
|                                | 1                        | 5y (n=6, range 3y-9y)  |                                                   |                                                   |                                                      | treatment; Case patient 1: On the 10th clinical day, we initiated methylprednisolone pulse therapy once daily for 3 days. Six hours after the initiation of steroid therapy, she became afebrile. On the next day, dyspnea was resolved. Chest radiograph on that day showed dramatic improvement. Five days after the initiation of steroid therapy, laboratory findings were normalized. She was discharged on the 17th day of admission without sequelae. |
| Teeratakulpisarn 2007 Thailand | RCT Pediatric outpatient | Bronchiolitis 4wk-24mo | 1) Dexamethasone 0.6mg/kg, single dose (IM), n=89 | Epinephrine, salbutamol, IV fluids, antimicrobial | Baseline & every 6h until study endpoint (resolution | Soon after study endpoint, but before being discharged,                                                                                                                                                                                                                                                                                                                                                                                                      |



|                     |             |  |                                                     |                                              |                                                                |                                                                                                                                                                                                                                                                                                                                                                                                                                                                                                            |
|---------------------|-------------|--|-----------------------------------------------------|----------------------------------------------|----------------------------------------------------------------|------------------------------------------------------------------------------------------------------------------------------------------------------------------------------------------------------------------------------------------------------------------------------------------------------------------------------------------------------------------------------------------------------------------------------------------------------------------------------------------------------------|
| Non-industry funded | ent or ED 2 |  | 2) Saline solution 0.6mg/kg, single dose (IM), n=85 | drugs & oxygen<br><br>No CS in preceding 2wk | of respiratory distress); FU at 2wk intervals for at least 1mo | systemic CS was prescribed to seven children (four in the dexamethasone group) because of re-wheezing. None of the children received theophylline or ribavirin. Three children (two in the dexamethasone group) developed occult blood in stools. Six children (three in the dexamethasone group) had subsequent diarrhea. Three children (all in the placebo group) had subsequent pneumonia with suspicious bacterial causes and required additional antibiotics. Table 5 - probable adverse outcomes of |
|---------------------|-------------|--|-----------------------------------------------------|----------------------------------------------|----------------------------------------------------------------|------------------------------------------------------------------------------------------------------------------------------------------------------------------------------------------------------------------------------------------------------------------------------------------------------------------------------------------------------------------------------------------------------------------------------------------------------------------------------------------------------------|

|                                                  |                                     |                         |                                                                                                                                                                                                                                     |                                                                       |                                                             |                                                                                                                                                                                      |
|--------------------------------------------------|-------------------------------------|-------------------------|-------------------------------------------------------------------------------------------------------------------------------------------------------------------------------------------------------------------------------------|-----------------------------------------------------------------------|-------------------------------------------------------------|--------------------------------------------------------------------------------------------------------------------------------------------------------------------------------------|
|                                                  |                                     |                         |                                                                                                                                                                                                                                     |                                                                       |                                                             | treatment up to 1 month post-treatment, n (Dex vs. Placebo): Occult blood in stools (2 vs. 1); Pneumonia (0 vs. 0); Diarrhea (3 vs. 3)                                               |
| van Woensel 1997 Netherlands Non-industry funded | RCT Hospital 1                      | Bronchiolitis <2y       | 1) Prednisolone powder 1.0mg/kg/day in 2 divided doses for 7d (oral), n=27<br>2) Placebo in 2 divided doses for 7d (oral), n=27                                                                                                     | Oxygen, bronchodilators, or antibiotics<br><br>No CS in preceding 2mo | Baseline & daily for 7d                                     | In the present study no clinically significant side effects of prednisolone were found.                                                                                              |
| Webb 1986 UK Non-industry funded                 | RCT, crossover "unit", outpatient 1 | Persistent wheeze <18mo | 1) Prednisolone 1.0mg/kg, twice daily for 5d (oral), n=NR (total patients in study = 38)<br>2) Placebo, twice daily for 5d (oral), n=18 crossed over<br><br>Multiple courses; 38 children completed a total of 56 treatment courses | Bronchodilator & antibiotics<br><br>NR                                | Daily for 5d & clinical exam 3d after treatment course (D8) | There were no side effects reported by the parents and none was detected on clinical examination at the time of review three days after completing the five day course of treatment. |
| Zhang 2003 Brazil                                | RCT Pediatric                       | Bronchiolitis <12mo     | 1) Prednisolone 1.0mg (oral) + standard care                                                                                                                                                                                        | IV hydrocortisone in first 24h                                        | Enrolment, 1mo, 3mo, 6mo &                                  | The potential side-effects of prednisolone                                                                                                                                           |

|                                                                                                                                                                               |                            |                       |                                                                                                                            |                                                           |                         |                                                                                                                                                                                                                                                                                                                                                              |
|-------------------------------------------------------------------------------------------------------------------------------------------------------------------------------|----------------------------|-----------------------|----------------------------------------------------------------------------------------------------------------------------|-----------------------------------------------------------|-------------------------|--------------------------------------------------------------------------------------------------------------------------------------------------------------------------------------------------------------------------------------------------------------------------------------------------------------------------------------------------------------|
| 1<br>2<br>3<br>4<br>5<br>6<br>7<br>8<br>9<br>10<br>11<br>12<br>13<br>14<br>15<br>16<br>17<br>18<br>19<br>20<br>21<br>22<br>23<br>24<br>25<br>26<br>27<br>28<br>29<br>30<br>31 | Non-<br>industry<br>funded | hospital<br>ward<br>1 | for 5d (NR),<br>n=28<br>2) Standard care<br>(oxygen, fluid<br>replacement,<br>nebulised<br>fenoterol) for<br>5d (NR), n=24 | after<br>hospitalization<br><br>No CS in<br>preceding 4wk | 12mo after<br>discharge | were not<br>included as<br>outcome<br>measures in<br>this study as<br>the safety of<br>short-term<br>steroid<br>therapy has<br>been well<br>confirmed. At<br>the time of<br>analysis of the<br>data, all 52<br>patients'<br>hospital<br>records were<br>reviewed and<br>no adverse<br>event was<br>noted in the<br>patients who<br>received<br>prednisolone. |
|-------------------------------------------------------------------------------------------------------------------------------------------------------------------------------|----------------------------|-----------------------|----------------------------------------------------------------------------------------------------------------------------|-----------------------------------------------------------|-------------------------|--------------------------------------------------------------------------------------------------------------------------------------------------------------------------------------------------------------------------------------------------------------------------------------------------------------------------------------------------------------|

<sup>1</sup>Hedlin 1999 and Svedmyr 1999 are associated publications; Svedmyr 1999 reports on an RCT comparing budesonide with placebo, and Hedlin 1999 reports systemic effects on a subgroup of these children with moderate to severe asthma exacerbations who required additional treatment (with oral betamethasone) and/or hospitalization;  
admin: administration; BW: birthweight; cc: cubic centimetre(s); CCT: controlled clinical trial; cm: centimeter(s); CS: corticosteroid; d/D: day(s); ED: emergency department; FP: fluticasone propionate; FU: follow-up; g: gram(s); h: hour(s); IM: intramuscular; IV: intravenous; kg: kilogram(s); L: litre(s); max.: maximum; mcg: microgram(s); MDI: metered-dose inhaler; mg: milligram(s); mL: milliliter(s); mo: month(s); neb: nebulized; NR: not reported; NRCT: non-randomized clinical trial; RCT: randomized clinical trial; RSV: respiratory syncytial virus; SA: Saudi Arabia; sal: salbutamol; UK: United Kingdom; URTI: upper respiratory tract infection; vs: versus; wk: week(s); y: year(s); yo: year old

**Supplement 4 Methodological quality of included studies**

- a. Summary of methodological quality assessments p. 1-2  
 b. Methodological quality assessments of included studies p. 3-6

**Supplement 4a. Summary of methodological quality assessments**

| <b>McHarm* criteria</b>                                                                                         | <b>Rating</b> | <b>No. of studies (%<sup>2</sup>)</b> |
|-----------------------------------------------------------------------------------------------------------------|---------------|---------------------------------------|
| 1) Were the harms PRE-DEFINED using standardized or precise definitions?                                        | Yes           | 6 (7)                                 |
|                                                                                                                 | No            | 79 (93)                               |
|                                                                                                                 | Unsure        | 0                                     |
| 2) Were SERIOUS events precisely defined?                                                                       | Yes           | 2 (2)                                 |
|                                                                                                                 | No            | 83 (98)                               |
|                                                                                                                 | Unsure        | 0                                     |
| 3) Were SEVERE events precisely defined?                                                                        | Yes           | 0                                     |
|                                                                                                                 | No            | 85 (100)                              |
|                                                                                                                 | Unsure        | 0                                     |
| 4) Were the number of DEATHS in each study group specified OR were the reason(s) for not specifying them given? | Yes           | 10 (12)                               |
|                                                                                                                 | No            | 75 (88)                               |
|                                                                                                                 | Unsure        | 0                                     |
| 5) Was the mode of harms collection specified as ACTIVE?                                                        | Yes           | 46 (54)                               |
|                                                                                                                 | No            | 37 (44)                               |
|                                                                                                                 | Unsure        | 2 (2)                                 |
| 6) Was the mode of harms collection specified as PASSIVE?                                                       | Yes           | 11 (13)                               |
|                                                                                                                 | No            | 73 (86)                               |
|                                                                                                                 | Unsure        | 1 (1)                                 |
| 7) Did the study specify WHO collected the harms?                                                               | Yes           | 22 (26)                               |
|                                                                                                                 | No            | 63 (74)                               |
|                                                                                                                 | Unsure        | 0                                     |
| 8) Did the study specify the TRAINING or BACKGROUND of who ascertained the harms?                               | Yes           | 20 (24)                               |
|                                                                                                                 | No            | 65 (76)                               |
|                                                                                                                 | Unsure        | 0                                     |
| 9) Did the study specify the TIMING and FREQUENCY of collection of the harms?                                   | Yes           | 39 (46)                               |
|                                                                                                                 | No            | 45 (53)                               |
|                                                                                                                 | Unsure        | 1 (1)                                 |
| 10) Did the author(s) use STANDARD scale(s) or checklist(s) for harms collection?                               | Yes           | 6 (7)                                 |
|                                                                                                                 | No            | 76 (89)                               |
|                                                                                                                 | Unsure        | 3 (4)                                 |
| 11) Did the authors specify if the harms reported encompass ALL the events collected or a selected SAMPLE?      | Yes           | 80 (94)                               |
|                                                                                                                 | No            | 2 (2)                                 |
|                                                                                                                 | Unsure        | 3 (4)                                 |
| 12) Was the NUMBER of participants that withdrew or were lost to follow-up specified for each study group?      | Yes           | 24 (28)                               |
|                                                                                                                 | No            | 61 (72)                               |

|                                                                                               |        |         |
|-----------------------------------------------------------------------------------------------|--------|---------|
|                                                                                               | Unsure | 0       |
| 13) Was the TOTAL NUMBER of participants affected by harms specified for each study arm?      | Yes    | 16 (19) |
|                                                                                               | No     | 69 (81) |
|                                                                                               | Unsure | 0       |
| 14) Did the author(s) specify the NUMBER for each TYPE of harmful event for each study group? | Yes    | 43 (51) |
|                                                                                               | No     | 39 (46) |
|                                                                                               | Unsure | 3 (4)   |
| 15) Did the author(s) specify the type of analyses undertaken for harms data?                 | Yes    | 10 (12) |
|                                                                                               | No     | 75 (88) |
|                                                                                               | Unsure | 0       |

\*methodological quality of publications/studies as assessed by the McHarm scale<sup>1</sup>

<sup>2</sup>sum of percentages may not total 100 due to rounding

## Supplement 4b. Methodological quality assessments of included studies

| Study (year)         | Harms pre-defined | Serious AE defined | Severe AE defined | Deaths specified | Mode of collection |         | Who collected AE | Training/ background of assessors | Timing/ frequency of AE collection | Checklist used for AE | Encompass all AE | Withdrawal and losses to follow-up specified | AE in each arm specified | # and type of AE specified | Type of analysis |
|----------------------|-------------------|--------------------|-------------------|------------------|--------------------|---------|------------------|-----------------------------------|------------------------------------|-----------------------|------------------|----------------------------------------------|--------------------------|----------------------------|------------------|
|                      |                   |                    |                   |                  | ACTIVE             | PASSIVE |                  |                                   |                                    |                       |                  |                                              |                          |                            |                  |
| Alangari (2014)      | N                 | N                  | N                 | N                | N                  | N       | N                | N                                 | N                                  | N                     | Y                | N                                            | N                        | N                          | N                |
| Alansari (2013)      | N                 | N                  | N                 | N                | Y                  | N       | Y                | Y                                 | Y                                  | N                     | Y                | Y                                            | N                        | N                          | N                |
| Aljebab (2017)       | Y                 | N                  | N                 | N                | Y                  | Y       | Y                | Y                                 | Y                                  | U                     | Y                | Y                                            | N                        | Y                          | Y                |
| Alshehr (2005)       | N                 | N                  | N                 | N                | N                  | N       | N                | N                                 | N                                  | N                     | Y                | N                                            | N                        | Y                          | N                |
| Altamimi (2006)      | N                 | N                  | N                 | N                | Y                  | N       | Y                | Y                                 | Y                                  | N                     | Y                | Y                                            | N                        | Y                          | N                |
| Bacharier (2008)     | N                 | N                  | N                 | N                | N                  | N       | N                | N                                 | N                                  | N                     | Y                | Y                                            | N                        | N                          | N                |
| Bisgaard (2006)      | Y                 | N                  | N                 | N                | Y                  | N       | N                | N                                 | Y                                  | N                     | N                | Y                                            | Y                        | U                          | Y                |
| Bjornson (2004)      | N                 | N                  | N                 | N                | Y                  | N       | Y                | Y                                 | Y                                  | N                     | Y                | N                                            | N                        | Y                          | N                |
| Brunette (1988)      | Y                 | N                  | N                 | N                | Y                  | N       | N                | N                                 | Y                                  | Y                     | Y                | N                                            | N                        | Y                          | Y                |
| Buckingham (2002)    | N                 | N                  | N                 | Y                | Y                  | N       | Y                | Y                                 | Y                                  | N                     | Y                | N                                            | N                        | Y                          | N                |
| Bulow (1999)         | N                 | N                  | N                 | N                | N                  | N       | N                | N                                 | N                                  | N                     | Y                | N                                            | Y                        | N                          | N                |
| Chang (2008)         | N                 | N                  | N                 | N                | Y                  | N       | N                | N                                 | Y                                  | N                     | Y                | Y                                            | Y                        | Y                          | N                |
| Chen (2008)          | N                 | N                  | N                 | N                | N                  | N       | N                | N                                 | N                                  | N                     | Y                | N                                            | N                        | N                          | N                |
| Chub-Appakarn (2007) | N                 | N                  | N                 | N                | N                  | N       | N                | N                                 | N                                  | N                     | Y                | N                                            | N                        | N                          | N                |
| Clavenna (2014)      | N                 | N                  | N                 | N                | Y                  | Y       | Y                | Y                                 | Y                                  | N                     | Y                | Y                                            | N                        | N                          | N                |
| Connett (1994)       | N                 | N                  | N                 | N                | N                  | N       | N                | N                                 | N                                  | N                     | Y                | N                                            | N                        | Y                          | N                |
| Connolly (1969)      | N                 | N                  | N                 | Y                | Y                  | N       | N                | N                                 | Y                                  | N                     | Y                | N                                            | N                        | Y                          | N                |
| Corneli (2007)       | N                 | N                  | N                 | N                | Y                  | N       | Y                | Y                                 | Y                                  | N                     | Y                | Y                                            | N                        | N                          | N                |
| Cronin (2016)        | N                 | N                  | N                 | N                | Y                  | Y       | Y                | Y                                 | Y                                  | N                     | Y                | Y                                            | N                        | Y                          | N                |
| Csonka (2003)        | N                 | N                  | N                 | N                | N                  | N       | N                | N                                 | N                                  | N                     | Y                | Y                                            | Y                        | Y                          | N                |

1  
2  
3  
4  
5  
6  
7  
8  
9  
10  
11  
12  
13  
14  
15  
16  
17  
18  
19  
20  
21  
22  
23  
24  
25  
26  
27  
28  
29  
30  
31  
32  
33  
34  
35  
36  
37  
38  
39  
40  
41  
42  
43  
44  
45  
46  
47

|                            |   |   |   |   |   |   |   |   |   |   |   |   |   |   |   |
|----------------------------|---|---|---|---|---|---|---|---|---|---|---|---|---|---|---|
| Daugbjerg (1993)           | N | N | N | N | N | N | N | N | N | N | Y | N | Y | Y | N |
| Dawson (1993)              | N | N | N | N | Y | Y | Y | Y | Y | U | Y | N | N | N | N |
| Ducharme (2009)            | Y | Y | N | N | Y | N | Y | Y | Y | N | Y | Y | Y | Y | Y |
| Eboriadou (2010)           | N | N | N | N | Y | N | N | N | N | N | Y | N | N | U | N |
| Eden (1967)                | N | N | N | Y | N | N | N | N | N | N | Y | N | N | U | N |
| Escobedo Chavez (1992)     | N | N | N | N | N | N | N | N | N | N | Y | N | N | N | N |
| Fifoot (2007)              | N | N | N | N | N | N | N | N | N | N | Y | Y | N | N | N |
| Fitzgerald (1996)          | N | N | N | N | U | U | N | N | Y | N | Y | Y | N | N | Y |
| Francis (1997)             | N | Y | N | N | N | N | N | N | N | N | U | Y | Y | N | N |
| Garbutt (2013)             | N | N | N | N | Y | N | Y | Y | Y | N | Y | N | N | N | N |
| Ghirga (2002)              | N | N | N | N | N | N | N | N | N | N | Y | N | N | N | N |
| Gill (2017)                | N | N | N | Y | Y | N | N | N | Y | N | Y | N | N | Y | Y |
| Goebel (2000)              | N | N | N | N | Y | N | Y | Y | Y | N | N | N | N | Y | N |
| Grant (1996)               | N | N | N | N | Y | Y | N | N | Y | N | Y | N | N | N | Y |
| Gries (2000)               | N | N | N | N | Y | N | Y | Y | Y | N | Y | N | N | Y | Y |
| Hedlin (1999) <sup>1</sup> | N | N | N | N | Y | N | Y | N | Y | Y | Y | N | Y | Y | Y |
| Husby (1993)               | N | N | N | N | U | N | Y | N | Y | N | Y | N | N | N | N |
| Inglis (1993)              | N | N | N | Y | Y | Y | N | N | Y | N | Y | Y | Y | Y | N |
| Jan (2000)                 | N | N | N | N | Y | N | N | N | Y | Y | Y | N | N | N | N |
| Jartti (2006)              | N | N | N | N | N | N | N | N | N | N | Y | N | N | N | N |
| Jartti (2007)              | N | N | N | N | N | N | N | N | N | N | Y | N | N | N | N |
| Jartti (2015)              | N | N | N | N | N | N | N | N | N | N | U | Y | N | N | N |
| Johnson (1996)             | N | N | N | N | N | N | N | N | N | N | Y | N | N | Y | N |
| Johnson (1998)             | N | N | N | N | N | N | N | N | N | N | U | N | N | Y | N |
| Klassen (1994)             | N | N | N | N | N | N | N | N | N | N | Y | N | N | Y | N |
| Klassen (1996)             | N | N | N | N | N | N | N | N | N | N | Y | N | N | Y | N |
| Klassen (1998)             | N | N | N | N | Y | Y | Y | Y | U | N | Y | Y | N | Y | N |
| Kuyucu (2004)              | N | N | N | N | N | N | N | N | N | N | Y | N | N | N | N |
| Lai (2005)                 | N | N | N | N | Y | N | N | N | Y | Y | Y | N | N | N | Y |

|    |                  |   |   |   |   |   |   |   |   |   |   |   |   |   |   |   |
|----|------------------|---|---|---|---|---|---|---|---|---|---|---|---|---|---|---|
| 1  |                  |   |   |   |   |   |   |   |   |   |   |   |   |   |   |   |
| 2  |                  |   |   |   |   |   |   |   |   |   |   |   |   |   |   |   |
| 3  | Langton-Hewer    |   |   |   |   |   |   |   |   |   |   |   |   |   |   |   |
| 4  | (1998)           | N | N | N | N | N | N | N | N | N | N | Y | N | N | Y | N |
| 5  | Lee (2001)       | N | N | N | Y | Y | N | N | N | Y | N | Y | Y | Y | Y | N |
| 6  | Leer (1969)      | N | N | N | N | N | N | N | N | N | N | Y | N | Y | Y | N |
| 7  | Leermann (2008)  | N | N | N | Y | Y | N | N | N | Y | N | Y | Y | Y | Y | N |
| 8  | Leipzig (1979)   | N | N | N | N | N | N | N | N | N | N | Y | N | N | N | N |
| 9  | Lin (1991)       | N | N | N | N | N | N | N | N | N | N | Y | N | N | Y | N |
| 10 | Lucas-Bouwman    |   |   |   |   |   |   |   |   |   |   |   |   |   |   |   |
| 11 | (2001)           | N | N | N | N | N | N | N | N | N | N | Y | Y | N | Y | N |
| 12 | Nahum (2009)     | N | N | N | Y | Y | N | N | N | Y | N | Y | Y | Y | Y | N |
| 13 | Paniagua (2017)  | N | N | N | N | Y | N | N | N | N | N | Y | N | N | Y | N |
| 14 | Panickar (2009)  | N | N | N | N | Y | Y | Y | Y | Y | N | Y | N | N | Y | N |
| 15 | Panigada (2014)  | N | N | N | N | Y | N | N | N | Y | N | Y | Y | Y | Y | N |
| 16 | Plint (2009)     | N | N | N | N | Y | N | Y | Y | Y | N | Y | N | N | Y | N |
| 17 | Razi (2015)      | N | N | N | N | N | N | N | N | N | N | Y | N | N | N | N |
| 18 | Roberts (1999)   | N | N | N | N | N | N | N | N | N | N | Y | N | N | Y | N |
| 19 | Roorda (1998)    | N | N | N | N | N | N | N | N | N | N | Y | N | N | N | N |
| 20 | Roosevelt (1996) | N | N | N | N | Y | N | Y | Y | Y | N | Y | N | N | Y | N |
| 21 | Sadowitz (2012)  | N | N | N | N | Y | Y | N | N | Y | N | Y | Y | Y | Y | N |
| 22 | Saito (2017)     | N | N | N | N | Y | N | N | N | N | N | Y | N | N | N | N |
| 23 | Schuh (2008)     | N | N | N | N | Y | N | Y | Y | Y | Y | Y | N | N | N | N |
| 24 | Schuh (2009)     | N | N | N | N | N | N | N | N | N | N | Y | Y | N | Y | N |
| 25 | Siomou (2003)    | Y | N | N | N | Y | N | N | N | Y | U | Y | N | N | N | N |
| 26 | Sparrow (2006)   | N | N | N | N | N | N | N | N | N | N | Y | N | N | N | N |
| 27 | Stafford (1998)  | Y | N | N | N | Y | N | N | N | Y | Y | Y | N | N | Y | N |
| 28 | Storr (1987)     | N | N | N | N | N | N | N | N | N | N | Y | N | N | N | N |
| 29 | Sumboonnanda     |   |   |   |   |   |   |   |   |   |   |   |   |   |   |   |
| 30 | (1997)           | N | N | N | N | Y | N | N | N | Y | N | Y | N | N | Y | N |
| 31 | Sung (1998)      | N | N | N | N | Y | Y | Y | Y | N | N | Y | N | N | N | N |
| 32 | Super (1989)     | N | N | N | N | N | N | N | N | N | N | Y | N | N | N | N |
| 33 |                  |   |   |   |   |   |   |   |   |   |   |   |   |   |   |   |
| 34 |                  |   |   |   |   |   |   |   |   |   |   |   |   |   |   |   |
| 35 |                  |   |   |   |   |   |   |   |   |   |   |   |   |   |   |   |
| 36 |                  |   |   |   |   |   |   |   |   |   |   |   |   |   |   |   |
| 37 |                  |   |   |   |   |   |   |   |   |   |   |   |   |   |   |   |
| 38 |                  |   |   |   |   |   |   |   |   |   |   |   |   |   |   |   |
| 39 |                  |   |   |   |   |   |   |   |   |   |   |   |   |   |   |   |
| 40 |                  |   |   |   |   |   |   |   |   |   |   |   |   |   |   |   |
| 41 |                  |   |   |   |   |   |   |   |   |   |   |   |   |   |   |   |
| 42 |                  |   |   |   |   |   |   |   |   |   |   |   |   |   |   |   |
| 43 |                  |   |   |   |   |   |   |   |   |   |   |   |   |   |   |   |
| 44 |                  |   |   |   |   |   |   |   |   |   |   |   |   |   |   |   |
| 45 |                  |   |   |   |   |   |   |   |   |   |   |   |   |   |   |   |
| 46 |                  |   |   |   |   |   |   |   |   |   |   |   |   |   |   |   |
| 47 |                  |   |   |   |   |   |   |   |   |   |   |   |   |   |   |   |



1  
2  
3  
4  
5  
6  
7  
8  
9  
10  
11  
12  
13  
14  
15  
16  
17  
18  
19  
20  
21  
22  
23  
24  
25  
26  
27  
28  
29  
30  
31  
32  
33  
34  
35  
36  
37  
38  
39  
40  
41  
42  
43  
44  
45  
46  
47

|                             |   |   |   |   |   |   |   |   |   |   |   |   |   |   |   |
|-----------------------------|---|---|---|---|---|---|---|---|---|---|---|---|---|---|---|
| Sussman (1964)              | N | N | N | N | Y | N | N | N | N | N | Y | N | N | Y | N |
| Svedmyr (1995)              | N | N | N | N | N | N | N | N | N | N | Y | N | Y | N | N |
| Svedmyr (1999) <sup>1</sup> | N | N | N | N | Y | N | Y | N | Y | Y | Y | N | Y | Y | Y |
| Tagarro (2014)              | N | N | N | N | N | N | N | N | N | N | Y | N | N | Y | N |
| Tal (1983)                  | N | N | N | Y | N | N | N | N | N | N | Y | N | N | N | N |
| Tamura (2008)               | N | N | N | N | Y | N | N | N | N | N | Y | N | N | N | N |
| Teeratakulpisarn (2007)     | N | N | N | N | Y | N | Y | Y | Y | N | Y | N | N | Y | N |
| van Woensel (1997)          | N | N | N | Y | N | N | N | N | N | N | Y | N | N | N | N |
| Webb (1986)                 | N | N | N | N | Y | Y | N | N | Y | N | Y | N | N | N | N |
| Zhang (2003)                | N | N | N | N | Y | N | N | N | N | N | Y | N | N | N | N |

<sup>1</sup> Hedlin 1999 and Svedmyr 1999 are associated publications; the two papers are assessed as one study  
N: no; U: unsure; Y: yes

REFERENCES

1. Chou R, Aronson N, Atkins DL, et al. Accessing harms when comparing medication interventions. In: Agency for Healthcare Research and Quality. Methods guide for effectiveness and comparative effectiveness reviews. Rockville, MD; 2008.

|    |                     |                                                               |
|----|---------------------|---------------------------------------------------------------|
| 1  |                     |                                                               |
| 2  |                     |                                                               |
| 3  | <b>Supplement 5</b> | <b>Effect estimates for all adverse events with subgroups</b> |
| 4  |                     |                                                               |
| 5  | a.                  | Infection & respiratory system p. 2-4                         |
| 6  | b.                  | Gastro-intestinal tract p. 5-7                                |
| 7  | c.                  | CNS & behaviour effects p. 8-9                                |
| 8  | d.                  | Dermatologic conditions p. 10                                 |
| 9  | e.                  | Endocrine/ metabolic & musculoskeletal systems p. 11          |
| 10 | f.                  | Cardiovascular system p. 12                                   |
| 11 | g.                  | General adverse events/ other symptoms p. 13                  |
| 12 | h.                  | Immune system & oncology p. 14                                |
| 13 |                     |                                                               |
| 14 |                     |                                                               |
| 15 |                     |                                                               |

16 The tables below report results of meta-analyses for adverse events, organized by organ systems.

17 Effect estimates were calculated for studies with more than one treatment arm, using risk difference (RD) for all comparative studies and, using  
18 Peto odds ratio (pOR) for studies that reported at least one event in at least one treatment arm. Shaded rows indicate all studies contributing to  
19 an outcome, for the specified comparison, without subgroup analysis. When data was available, subgroup analyses (non-shaded rows) using  
20 study-level data were conducted for dose (single versus multi-dose) and for respiratory condition (e.g., bronchiolitis).  
21  
22  
23  
24  
25  
26  
27  
28  
29  
30  
31  
32  
33  
34  
35  
36  
37  
38  
39  
40  
41  
42  
43  
44  
45  
46  
47

## Supplement 6a. Infection &amp; respiratory system

| Adverse event                     | Comparison 1 vs. Comparison 2 | Subgroup      | No. of studies | Comparison 1 – no. of patients with events/total no. of patients | Comparison 2 – no. of patients with events/total no. of patients | RD (95% CI)         | I <sup>2</sup> (%) | Peto OR (95% CI)  | I <sup>2</sup> (%) |
|-----------------------------------|-------------------------------|---------------|----------------|------------------------------------------------------------------|------------------------------------------------------------------|---------------------|--------------------|-------------------|--------------------|
| Severe infections, overall        | Systemic vs. placebo          |               | 4              | 0/552                                                            | 2/554                                                            | 0.00 (-0.01, 0.00)  | 0                  | 0.15 (0.01, 2.45) | 0                  |
| Severe infections, by dose        | Systemic vs. placebo          | Single dose   | 1              | 0/359                                                            | 1/361                                                            | 0.00 (-0.01, 0.00)  | NA                 | 0.14 (0.00, 6.86) | NA                 |
|                                   | Systemic vs. placebo          | Multi-dose    | 3              | 0/193                                                            | 1/193                                                            | 0.00 (-0.01, 0.01)  | 0                  | 0.17 (0.00, 8.79) | NA                 |
| Severe infections, by condition   | Systemic vs. placebo          | Bronchiolitis | 2              | 0/179                                                            | 0/175                                                            | 0.00 (-0.01, 0.01)  | 0                  | NA                | NA                 |
|                                   | Systemic vs. placebo          | Croup         | 2              | 0/373                                                            | 2/379                                                            | 0.00 (-0.01, 0.00)  | 0                  | 0.15 (0.01, 2.45) | 0                  |
| Severe infections, overall        | Inhaled vs. placebo           |               | 1              | 2/62                                                             | 4/67                                                             | -0.03 (-0.10, 0.04) | NA                 | 0.54 (0.11, 2.77) | NA                 |
| Systemic infections, overall      | Systemic vs. placebo          |               | 4              | 5/1095                                                           | 4/1083                                                           | 0.00 (0.00, 0.00)   | 0                  | 1.26 (0.34, 4.68) | NA                 |
| Systemic infections, by dose      | Systemic vs. placebo          | Single dose   | 2              | 5/664                                                            | 4/656                                                            | 0.00 (-0.01, 0.01)  | 0                  | 1.26 (0.34, 4.68) | NA                 |
|                                   | Systemic vs. placebo          | Multi-dose    | 2              | 0/431                                                            | 0/427                                                            | 0.00 (-0.01, 0.01)  | 0                  | NA                | NA                 |
| Systemic infections, by condition | Systemic vs. placebo          | Bronchiolitis | 2              | 0/705                                                            | 0/695                                                            | 0.00 (0.00, 0.00)   | 0                  | NA                | NA                 |
|                                   | Systemic vs. placebo          | Croup         | 1              | 5/359                                                            | 4/361                                                            | 0.00 (-0.01, 0.02)  | NA                 | 1.26 (0.34, 4.68) | NA                 |
|                                   | Systemic vs. placebo          | Wheeze        | 1              | 0/31                                                             | 0/27                                                             | 0.00 (-0.07, 0.07)  | NA                 | NA                | NA                 |

|                              |                      |                    |   |        |        |                     |    |                     |    |
|------------------------------|----------------------|--------------------|---|--------|--------|---------------------|----|---------------------|----|
| Systemic infections, overall | Inhaled vs. placebo  | Multi-dose, wheeze | 2 | 18/91  | 20/94  | 0.00 (-0.06, 0.06)  | 0  | 0.96 (0.45, 2.05)   | NA |
| Lung/trachea, overall        | Systemic vs. placebo |                    | 7 | 18/955 | 28/928 | -0.01 (-0.02, 0.01) | 37 | 0.61 (0.34, 1.12)   | 0  |
| Lung/trachea, by dose        | Systemic vs. placebo | Single dose        | 5 | 6/793  | 9/761  | 0.00 (-0.01, 0.00)  | 0  | 0.57 (0.20, 1.62)   | 0  |
|                              | Systemic vs. placebo | Multi-dose         | 2 | 12/162 | 19/167 | -0.09 (-0.29, 0.10) | 69 | 0.63 (0.30, 1.33)   | 57 |
| Lung/trachea, by condition   | Systemic vs. placebo | Bronchiolitis      | 3 | 12/542 | 19/529 | -0.02 (-0.05, 0.02) | 61 | 0.61 (0.29, 1.28)   | 30 |
|                              | Systemic vs. placebo | Croup              | 4 | 6/413  | 9/399  | -0.02 (-0.12, 0.07) | 40 | 0.61 (0.21, 1.76)   | 6  |
| Lung/trachea, overall        | Inhaled vs. placebo  | Multi-dose, wheeze | 1 | 13/62  | 10/67  | 0.06 (-0.07, 0.19)  | NA | 1.51 (0.61, 3.70)   | NA |
| URT, overall                 | Systemic vs. placebo |                    | 6 | 9/671  | 7/656  | 0.00 (-0.01, 0.01)  | 0  | 1.21 (0.44, 3.33)   | 0  |
| URT, by dose                 | Systemic vs. placebo | Single dose        | 4 | 1/492  | 1/480  | 0.00 (-0.01, 0.01)  | 0  | 0.46 (0.02, 10.18)  | 0  |
|                              | Systemic vs. placebo | Multi-dose         | 2 | 8/179  | 6/176  | 0.01 (-0.03, 0.05)  | 0  | 1.36 (0.47, 3.96)   | NA |
| URT, by condition            | Systemic vs. placebo | Bronchiolitis      | 1 | 8/148  | 6/149  | 0.01 (-0.03, 0.06)  | NA | 1.36 (0.47, 3.96)   | NA |
| URT, by condition            | Systemic vs. placebo | Croup              | 4 | 1/492  | 1/480  | 0.00 (-0.01, 0.01)  | 0  | 0.46 (0.02, 10.18)  | 0  |
|                              | Systemic vs. placebo | Wheeze             | 1 | 0/31   | 0/27   | 0.00 (-0.07, 0.07)  | NA | NA                  | NA |
| URT, overall                 | Inhaled vs. placebo  |                    | 6 | 24/495 | 24/499 | 0.00 (-0.02, 0.02)  | 0  | 1.03 (0.57, 1.85)   | 21 |
| URT, by dose                 | Inhaled vs. placebo  | Single dose        | 3 | 2/140  | 0/144  | 0.00 (-0.02, 0.03)  | 14 | 7.40 (0.45, 121.47) | NA |
|                              | Inhaled vs. placebo  | Multi-dose         | 3 | 22/355 | 24/355 | -0.01 (-0.04, 0.03) | 0  | 0.93 (0.51, 1.71)   | 0  |

|                                |                      |                |   |        |        |                      |    |                     |    |
|--------------------------------|----------------------|----------------|---|--------|--------|----------------------|----|---------------------|----|
| URT, by condition              | Inhaled vs. placebo  | Croup          | 3 | 2/140  | 0/144  | 0.00 (-0.02, 0.03)   | 14 | 7.40 (0.45, 121.47) | NA |
|                                | Inhaled vs. placebo  | Wheeze         | 3 | 22/355 | 24/355 | -0.01 (-0.04, 0.03)  | 0  | 0.93 (0.51, 1.71)   | 0  |
| Voice complaints, overall      | Systemic vs. placebo |                | 1 | 0/31   | 0/27   | 0.00 (-0.07, 0.07)   | NA | NA                  | NA |
| Voice complaints, overall      | Inhaled vs. placebo  | All multi-dose | 4 | 38/343 | 43/337 | -0.01 (-0.10, 0.07)  | 64 | 0.85 (0.53, 1.36)   | 73 |
| Voice complaints, by condition | Inhaled vs. placebo  | Asthma         | 2 | 4/50   | 9/49   | -0.08 (-0.046, 0.31) | 90 | 0.39 (0.12, 1.26)   | 81 |
|                                | Inhaled vs. placebo  | Wheeze         | 2 | 34/293 | 34/288 | 0.00 (-0.04, 0.04)   | 0  | 0.99 (0.59, 1.64)   | NA |

RD: risk difference; CI: confidence interval; NA not applicable/estimable; no.: number; Peto OR: Peto odds ratio; URT=upper respiratory tract; vs.: versus

## Supplement 6b. Gastro-intestinal tract

| Adverse event          | Comparison 1 vs. Comparison 2 | Subgroup           | No. of studies | Comparison 1 – no. of patients with events/total no. of patients | Comparison 2 – no. of patients with events/total no. of patients | RD (95% CI)         | I <sup>2</sup> (%) | Peto OR (95% CI)   | I <sup>2</sup> (%) |
|------------------------|-------------------------------|--------------------|----------------|------------------------------------------------------------------|------------------------------------------------------------------|---------------------|--------------------|--------------------|--------------------|
| Bleeding, overall      | Systemic vs. placebo          |                    | 7              | 31/1287                                                          | 31/1262                                                          | 0.00 (0.00, 0.00)   | 0                  | 1.00 (0.60, 1.67)  | 0                  |
| Bleeding, by dose      | Systemic vs. placebo          | Single dose        | 4              | 2/800                                                            | 1/790                                                            | 0.00 (0.00, 0.00)   | 0                  | 1.87 (0.19, 18.27) | NA                 |
|                        | Systemic vs. placebo          | Multi-dose         | 3              | 29/487                                                           | 30/472                                                           | 0.00 (-0.02, 0.02)  | 0                  | 0.96 (0.57, 1.64)  | 0                  |
| Bleeding, by condition | Systemic vs. placebo          | Bronchiolitis      | 5              | 31/881                                                           | 31/852                                                           | 0.00 (-0.01, 0.01)  | 0                  | 1.00 (0.60, 1.67)  | 0                  |
|                        | Systemic vs. placebo          | Croup              | 2              | 0/406                                                            | 0/410                                                            | 0.00 (-0.01, 0.01)  | 0                  | NA                 | NA                 |
| Bleeding, overall      | Inhaled vs. placebo           | Single dose, croup | 1              | 0/48                                                             | 0/49                                                             | 0.00 (-0.04, 0.04)  | NA                 | NA                 | NA                 |
| Vomiting, overall      | Systemic vs. placebo          |                    | 7              | 38/1603                                                          | 34/1573                                                          | 0.00 (0.00, 0.01)   | 0                  | 1.10 (0.69, 1.76)  | 17                 |
| Vomiting, by dose      | Systemic vs. placebo          | Single dose        | 4              | 21/747                                                           | 23/712                                                           | 0.00 (-0.02, 0.01)  | 0                  | 0.87 (0.47, 1.59)  | 24                 |
|                        | Systemic vs. placebo          | Multi-dose         | 3              | 17/856                                                           | 11/861                                                           | 0.00 (-0.01, 0.02)  | 37                 | 1.58 (0.75, 3.36)  | 0                  |
| Vomiting, by condition | Systemic vs. placebo          | Asthma             | 1              | 1/37                                                             | 5/33                                                             | -0.11 (-0.27, 0.06) | 33                 | 0.19 (0.03, 1.02)  | 0                  |
|                        | Systemic vs. placebo          | Bronchiolitis      | 3              | 24/751                                                           | 21/718                                                           | 0.00 (-0.02, 0.02)  | 0                  | 1.12 (0.62, 2.04)  | 0                  |
|                        | Systemic vs. placebo          | Croup              | 1              | 3/359                                                            | 4/361                                                            | 0.00 (-0.02, 0.01)  | NA                 | 0.75 (0.17, 3.34)  | NA                 |

|                         |                                 |                    |   |        |        |                      |    |                     |    |
|-------------------------|---------------------------------|--------------------|---|--------|--------|----------------------|----|---------------------|----|
|                         | Systemic vs. placebo            | Wheeze             | 2 | 10/456 | 4/461  | 0.02 (-0.06, 0.11)   | 87 | 2.55 (0.87, 7.46)   | 0  |
| Vomiting, overall       | Inhaled vs. placebo             |                    | 5 | 28/421 | 28/420 | 0.00 (-0.03, 0.04)   | 0  | 1.00 (0.58, 1.72)   | 0  |
| Vomiting, by dose       | Inhaled vs. placebo             | Single dose        | 1 | 2/25   | 1/25   | 0.04 (-0.09, 0.17)   | NA | 2.00 (0.20, 20.20)  | NA |
|                         | Inhaled vs. placebo             | Multi-dose         | 4 | 26/396 | 27/395 | 0.00 (-0.03, 0.03)   | 0  | 0.96 (0.55, 1.67)   | 0  |
| Vomiting, by condition  | Inhaled vs. placebo             | Asthma             | 1 | 1/28   | 0/27   | 0.04 (-0.06, 0.13)   | NA | 7.13 (0.14, 359.55) | NA |
|                         | Inhaled vs. placebo             | Croup              | 2 | 4/67   | 4/65   | 0.00 (-0.08, 0.08)   | 0  | 0.97 (0.23, 4.00)   | 0  |
|                         | Inhaled vs. placebo             | Wheeze             | 2 | 23/326 | 24/328 | 0.00 (-0.04, 0.04)   | 0  | 0.96 (0.53, 1.74)   | 0  |
| Vomiting, overall       | Dexamethasone vs. other steroid |                    | 6 | 12/663 | 51/710 | -0.06 (-0.09, -0.02) | 58 | 0.29 (0.17, 0.48)   | 0  |
| Vomiting, by dose       | Dexamethasone vs. other steroid | Single dose        | 5 | 6/376  | 39/420 | -0.08 (-0.11, -0.05) | 47 | 0.23 (0.12, 0.42)   | 0  |
|                         | Dexamethasone vs. other steroid | Multi-dose         | 1 | 6/287  | 12/290 | -0.02 (-0.05, -0.01) | NA | 0.51 (0.20, 1.30)   | NA |
| Vomiting, by condition  | Dexamethasone vs. other steroid | Asthma             | 3 | 6/466  | 28/466 | -0.05 (-0.11, 0.00)  | 77 | 0.26 (0.13, 0.52)   | 52 |
|                         | Dexamethasone vs. other steroid | Croup              | 2 | 5/111  | 8/75   | -0.04 (-0.16, 0.08)  | 64 | 0.46 (0.14, 1.45)   | 0  |
|                         | Dexamethasone vs. other steroid | Other conditions   | 1 | 1/86   | 15/169 | -0.08 (-0.13, -0.02) | 3  | 0.25 (0.09, 0.72)   | 0  |
| Abdominal pain, overall | Systemic vs. placebo            | Single dose, croup | 1 | 1/359  | 1/361  | 0.00 (-0.01, 0.01)   | NA | 1.01 (0.06, 16.11)  | NA |
| Abdominal pain, overall | Dexamethasone vs. other steroid |                    | 3 | 29/188 | 48/264 | -0.01 (-0.07, 0.05)  | 0  | 0.96 (0.57, 1.61)   | 0  |

|                              |                                 |                    |   |        |        |                     |    |                   |    |
|------------------------------|---------------------------------|--------------------|---|--------|--------|---------------------|----|-------------------|----|
| Abdominal pain, by condition | Dexamethasone vs. other steroid | Asthma             | 1 | 2/56   | 3/54   | -0.02 (-0.10, 0.06) | NA | 0.64 (0.11, 3.79) | NA |
|                              |                                 | Croup              | 1 | 9/46   | 7/41   | 0.02 (-0.14, 0.19)  | NA | 1.18 (0.40, 3.47) | NA |
|                              |                                 | Other conditions   | 1 | 18/86  | 38/169 | -0.01 (-0.12, 0.10) | 0  | 0.94 (0.50, 1.77) | 0  |
| Diarrhea, overall            | Systemic vs. placebo            |                    | 3 | 10/254 | 9/230  | 0.01 (-0.03, 0.04)  | 0  | 1.09 (0.43, 2.73) | 0  |
| Diarrhea, by dose            | Systemic vs. placebo            | Single dose        | 1 | 3/89   | 3/85   | 0.00 (-0.06, 0.05)  | NA | 0.95 (0.19, 4.84) | NA |
|                              | Systemic vs. placebo            | Multi-dose         | 2 | 7/165  | 6/145  | 0.01 (-0.03, 0.05)  | 0  | 1.16 (0.38, 3.54) | 0  |
| Diarrhea, by condition       | Systemic vs. placebo            | Bronchiolitis      | 1 | 3/89   | 3/85   | 0.00 (-0.06, 0.05)  | NA | 0.95 (0.19, 4.84) | NA |
|                              | Systemic vs. placebo            | Wheeze             | 2 | 7/165  | 6/145  | 0.01 (-0.03, 0.05)  | 0  | 1.16 (0.38, 3.54) | 0  |
| Diarrhea, overall            | Inhaled vs. placebo             | Multi-dose, wheeze | 2 | 41/326 | 46/328 | -0.01 (-0.09, 0.08) | 37 | 0.89 (0.57, 1.40) | 44 |

RD: risk difference; CI: confidence interval; NA: not applicable/estimable; no.: number; Peto OR: Peto odds ratio; vs.: versus



## Supplement 6c. CNS &amp; behavior effects

| Adverse event                    | Comparison 1 vs. Comparison 2   | Subgroup           | No. of studies | Comparison 1 – no. of patients with events/total no. of patients | Comparison 2 – no. of patients with events/total no. of patients | RD (95% CI)         | I <sup>2</sup> (%) | Peto OR (95% CI)    | I <sup>2</sup> (%) |
|----------------------------------|---------------------------------|--------------------|----------------|------------------------------------------------------------------|------------------------------------------------------------------|---------------------|--------------------|---------------------|--------------------|
| Tremor/jitteriness, overall      | Systemic vs. placebo            |                    | 5              | 22/559                                                           | 14/508                                                           | 0.01 (-0.01, 0.03)  | 0                  | 1.44 (0.71, 2.92)   | 0                  |
| Tremor/jitteriness, by dose      | Systemic vs. placebo            | Single dose        | 2              | 9/83                                                             | 7/56                                                             | 0.00 (-0.08, 0.08)  | 0                  | 1.15 (0.36, 3.66)   | 0                  |
|                                  | Systemic vs. placebo            | Multi-dose         | 3              | 13/476                                                           | 7/452                                                            | 0.01 (-0.01, 0.03)  | 0                  | 1.65 (0.67, 4.02)   | 0                  |
| Tremor/jitteriness, by condition | Systemic vs. placebo            | Asthma             | 1              | 9/37                                                             | 7/33                                                             | 0.01 (-0.16, 0.18)  | 0                  | 1.15 (0.36, 3.66)   | 0                  |
|                                  |                                 | Bronchiolitis      | 3              | 10/470                                                           | 6/447                                                            | 0.01 (-0.01, 0.03)  | 0                  | 1.66 (0.62, 4.46)   | 0                  |
|                                  |                                 | Wheeze             | 1              | 3/52                                                             | 1/28                                                             | 0.02 (-0.07, 0.12)  | NA                 | 1.58 (0.19, 12.83)  | NA                 |
| Tremor/jitteriness, overall      | Dexamethasone vs. other steroid | Single dose, croup | 1              | 1/46                                                             | 0/41                                                             | 0.02 (-0.04, 0.08)  | NA                 | 6.63 (0.13, 336.21) | NA                 |
| Behaviour change, overall        | Systemic vs. placebo            |                    | 4              | 7/588                                                            | 3/571                                                            | 0.00 (-0.01, 0.02)  | 19                 | 1.95 (0.55, 6.92)   | 0                  |
| Behaviour change, by dose        | Systemic vs. placebo            | Single dose        | 2              | 1/423                                                            | 1/426                                                            | 0.00 (-0.01, 0.01)  | 0                  | 1.01 (0.06, 16.11)  | NA                 |
|                                  | Systemic vs. placebo            | Multi-dose         | 2              | 6/165                                                            | 2/145                                                            | 0.02 (-0.02, 0.06)  | 11                 | 2.32 (0.56, 9.64)   | 0                  |
| Behaviour change, by condition   | Systemic vs. placebo            | Croup              | 2              | 1/423                                                            | 1/426                                                            | 0.00 (-0.01, 0.01)  | 0                  | 1.01 (0.06, 16.11)  | NA                 |
|                                  | Systemic vs. placebo            | Wheeze             | 2              | 6/165                                                            | 2/145                                                            | 0.02 (-0.02, 0.06)  | 11                 | 2.32 (0.56, 9.64)   | 0                  |
| Behaviour change, overall        | Inhaled vs. placebo             |                    | 3              | 6/134                                                            | 7/135                                                            | -0.01 (-0.04, 0.03) | 0                  | 0.81 (0.26, 2.54)   | 0                  |

|                                |                                 |                     |   |       |       |                     |    |                     |    |
|--------------------------------|---------------------------------|---------------------|---|-------|-------|---------------------|----|---------------------|----|
| Behaviour change, by dose      | Inhaled vs. placebo             | Single dose         | 1 | 0/64  | 1/68  | -0.01 (-0.06, 0.03) | NA | 0.14 (0.00, 7.25)   | NA |
|                                | Inhaled vs. placebo             | Multi-dose          | 2 | 6/70  | 6/67  | 0.02 (-0.06, 0.10)  | 0  | 0.95 (0.28, 3.15)   | 11 |
| Behaviour change, by condition | Inhaled vs. placebo             | Asthma              | 1 | 1/28  | 0/27  | 0.04 (-0.06, 0.13)  | NA | 7.13 (0.14, 359.55) | NA |
|                                | Inhaled vs. placebo             | Croup               | 2 | 5/106 | 7/108 | -0.02 (-0.05, 0.02) | 0  | 0.66 (0.20, 2.18)   | 0  |
| Behaviour change, overall      | Dexamethasone vs. other steroid | All single dose     | 2 | 35/60 | 38/57 | -0.08 (-0.25, 0.09) | 0  | 0.73 (0.34, 1.56)   | 0  |
| Behaviour change, by condition | Dexamethasone vs. other steroid | Asthma              | 1 | 10/14 | 14/16 | -0.16 (-0.45, 0.13) | NA | 0.38 (0.06, 2.21)   | NA |
|                                | Dexamethasone vs. other steroid | Croup               | 1 | 25/46 | 24/41 | -0.04 (-0.25, 0.17) | NA | 0.85 (0.36, 1.97)   | NA |
| Headache, overall              | Systemic vs. placebo            | Single dose, asthma | 1 | 0/37  | 1/33  | -0.02 (-0.10, 0.07) | 0  | 0.11 (0.00, 5.68)   | NA |
| Headache, overall              | Dexamethasone vs. other steroid | All single dose     | 2 | 7/102 | 4/95  | 0.02 (-0.08, 0.11)  | 51 | 1.63 (0.46, 5.74)   | NA |
| Headache, by condition         | Dexamethasone vs. other steroid | Asthma              | 1 | 0/56  | 0/54  | 0.00 (-0.03, 0.03)  | NA | NA                  | NA |
|                                |                                 | Croup               | 1 | 7/46  | 4/41  | 0.05 (-0.08, 0.19)  | NA | 1.63 (0.46, 5.74)   | NA |

RD: risk difference; CI: confidence interval; NA: not applicable/estimable; no.: number; Peto OR: Peto odds ratio; vs.: versus

## Supplement 6d. Dermatologic conditions

| Adverse event            | Comparison 1 vs. Comparison 2   | Subgroup            | No. of studies | Comparison 1 – no. of patients with events/total no. of patients | Comparison 2 – no. of patients with events/total no. of patients | RD (95% CI)         | I <sup>2</sup> (%) | Peto OR (95% CI)    | I <sup>2</sup> (%) |
|--------------------------|---------------------------------|---------------------|----------------|------------------------------------------------------------------|------------------------------------------------------------------|---------------------|--------------------|---------------------|--------------------|
| Burn, overall            | Inhaled vs. placebo             | Single dose, croup  | 1              | 0/27                                                             | 1/27                                                             | -0.04 (-0.13, 0.06) | NA                 | 0.14 (0.00, 6.82)   | NA                 |
| Integument, overall      | Systemic vs. placebo            |                     | 3              | 4/536                                                            | 0/543                                                            | 0.01 (0.00, 0.01)   | 0                  | 7.59 (1.07, 54.01)  | 0                  |
| Integument, by dose      | Systemic vs. placebo            | Single dose         | 2              | 2/423                                                            | 0/426                                                            | 0.01 (0.00, 0.01)   | 0                  | 7.45 (0.47, 119.36) | NA                 |
|                          | Systemic vs. placebo            | Multi-dose          | 1              | 2/133                                                            | 0/117                                                            | 0.02 (-0.01, 0.05)  | NA                 | 7.72 (0.48, 124.29) | NA                 |
| Integument, by condition | Systemic vs. placebo            | Croup               | 2              | 2/423                                                            | 0/426                                                            | 0.01 (0.00, 0.01)   | 0                  | 7.45 (0.47, 119.36) | NA                 |
|                          | Systemic vs. placebo            | Wheeze              | 1              | 2/113                                                            | 0/117                                                            | 0.02 (-0.01, 0.05)  | NA                 | 7.72 (0.48, 124.29) | NA                 |
| Integument, overall      | Inhaled vs. placebo             |                     | 4              | 24/432                                                           | 27/436                                                           | -0.01 (-0.04, 0.02) | 11                 | 0.88 (0.50, 1.56)   | 37                 |
| Integument, by dose      | Inhaled vs. placebo             | Single dose         | 1              | 0/64                                                             | 1/68                                                             | -0.01 (-0.06, 0.03) | NA                 | 0.14 (0.00, 7.25)   | NA                 |
|                          | Inhaled vs. placebo             | Multi-dose          | 3              | 24/368                                                           | 26/368                                                           | -0.01 (-0.05, 0.04) | 38                 | 0.92 (0.52, 1.63)   | 49                 |
| Integument, by condition | Inhaled vs. placebo             | Croup               | 2              | 0/106                                                            | 3/108                                                            | -0.02 (-0.06, 0.01) | 0                  | 0.13 (0.01, 1.27)   | 0                  |
|                          | Inhaled vs. placebo             | Wheeze              | 2              | 24/326                                                           | 24/328                                                           | 0.01 (-0.05, 0.07)  | 46                 | 1.00 (0.56, 1.80)   | 47                 |
| Phlebitis, overall       | Dexamethasone vs. other steroid | Single dose, asthma | 1              | 0/15                                                             | 0/17                                                             | 0.00 (-0.11, 0.11)  | NA                 | NA                  | NA                 |

RD: risk difference; CI: confidence interval; NA: not applicable/estimable; no.: number; Peto OR: Peto odds ratio; vs.: versus

Supplement 6e. Endocrine/metabolic & musculoskeletal systems

1  
2  
3  
4  
5  
6  
7  
8  
9  
10  
11  
12  
13  
14  
15  
16  
17  
18  
19  
20  
21  
22  
23  
24  
25  
26  
27  
28  
29  
30  
31  
32  
33  
34  
35  
36  
37  
38  
39  
40  
41  
42  
43  
44  
45  
46  
47

| Adverse event                                   | Comparison 1 vs. Comparison 2   | Subgroup                  | No. of studies | Comparison 1 – no. of patients with events/total no. of patients | Comparison 2 – no. of patients with events/total no. of patients | RD (95% CI)         | I <sup>2</sup> (%) | Peto OR (95% CI)    | I <sup>2</sup> (%) |
|-------------------------------------------------|---------------------------------|---------------------------|----------------|------------------------------------------------------------------|------------------------------------------------------------------|---------------------|--------------------|---------------------|--------------------|
| Fluid & electrolyte abnormalities, overall      | Systemic vs. placebo            |                           | 4              | 5/832                                                            | 1/818                                                            | 0.00 (0.00, 0.01)   | 0                  | 3.08 (0.60, 15.94)  | 0                  |
| Fluid & electrolyte abnormalities, by dose      | Systemic vs. placebo            | Single dose               | 1              | 1/359                                                            | 0/361                                                            | 0.00 (0.00, 0.01)   | NA                 | 7.43 (0.15, 374.47) | NA                 |
|                                                 | Systemic vs. placebo            | Multi-dose                | 3              | 4/473                                                            | 1/457                                                            | 0.00 (-0.01, 0.01)  | 0                  | 2.56 (0.42, 15.61)  | 0                  |
| Fluid & electrolyte abnormalities, by condition | Systemic vs. placebo            | Bronchiolitis             | 2              | 4/448                                                            | 1/432                                                            | 0.00 (-0.01, 0.01)  | 0                  | 2.56 (0.42, 15.61)  | 0                  |
|                                                 | Systemic vs. placebo            | Croup                     | 2              | 1/384                                                            | 0/386                                                            | 0.00 (0.00, 0.01)   | 0                  | 7.43 (0.15, 374.47) | NA                 |
| Fluid & electrolyte abnormalities, overall      | Dexamethasone vs. other steroid | Multi-dose, bronchiolitis | 1              | 1/33                                                             | 2/15                                                             | -0.10 (-0.28, 0.08) | NA                 | 0.18 (0.01, 2.17)   | NA                 |
| Adrenal suppression, overall                    | Inhaled vs. placebo             | Multi-dose, asthma        | 1              | 5/6                                                              | 4/10                                                             | 0.43 (0.01, 0.86)   | NA                 | 5.21 (0.72, 37.57)  | NA                 |

RD: risk difference; CI: confidence interval; NA: not applicable/estimable; no.: number; Peto OR: Peto odds ratio; vs.: versus

| Adverse event | Comparison 1 vs. Comparison 2 | Subgroup           | No. of studies | Comparison 1 – total no. of patients | Comparison 2 – total no. of patients | Mean Difference (95% CI) | I <sup>2</sup> (%) |
|---------------|-------------------------------|--------------------|----------------|--------------------------------------|--------------------------------------|--------------------------|--------------------|
| Linear growth | Inhaled vs. placebo           | Multi-dose, wheeze | 2              | 154                                  | 109                                  | 0.10 (-0.47, 0.67)       | 9                  |

CI: confidence interval; no.: number; vs.: versus

## Supplement 6f. Cardiovascular system

| Adverse event                     | Comparison 1 vs. Comparison 2   | Subgroup            | No. of studies | Comparison 1 – no. of patients with events/total no. of patients | Comparison 2 – no. of patients with events/total no. of patients | RD (95% CI)        | I <sup>2</sup> (%) | Peto OR (95% CI)   | I <sup>2</sup> (%) |
|-----------------------------------|---------------------------------|---------------------|----------------|------------------------------------------------------------------|------------------------------------------------------------------|--------------------|--------------------|--------------------|--------------------|
| Arrhythmia, overall               | Systemic vs. placebo            | Multi-dose, wheeze  | 1              | 0/31                                                             | 0/27                                                             | 0.00 (-0.07, 0.07) | NA                 | NA                 | NA                 |
| Arrhythmia, overall               | Inhaled vs. placebo             | Multi-dose, wheeze  | 1              | 0/29                                                             | 0/27                                                             | 0.00 (-0.07, 0.07) | NA                 | NA                 | NA                 |
| Arrhythmia, overall               | Dexamethasone vs. other steroid | Multi-dose, asthma  | 1              | 0/56                                                             | 0/54                                                             | 0.00 (-0.03, 0.03) | NA                 | NA                 | NA                 |
| Hypertension, overall             | Systemic vs. placebo            | All bronchiolitis   | 3              | 1/727                                                            | 1/714                                                            | 0.00 (-0.01, 0.01) | 0                  | 1.00 (0.06, 15.99) | 50                 |
| Hypertension, by dose             | Systemic vs. placebo            | Single dose         | 1              | 0/305                                                            | 0/295                                                            | 0.00 (-0.01, 0.01) | NA                 | NA                 | NA                 |
|                                   | Systemic vs. placebo            | Multi-dose          | 2              | 1/422                                                            | 1/419                                                            | 0.00 (-0.01, 0.01) | 0                  | 1.00 (0.06, 15.99) | 50                 |
| Hypertension, overall             | Dexamethasone vs. other steroid | Single dose, asthma | 1              | 0/15                                                             | 0/17                                                             | 0.00 (-0.11, 0.11) | NA                 | NA                 | NA                 |
| Congestive heart failure, overall | Systemic vs. placebo            | Multi-dose, croup   | 1              | 0/25                                                             | 0/25                                                             | 0.00 (-0.07, 0.07) | NA                 | NA                 | NA                 |

RD: risk difference; CI: confidence interval; NA: not applicable/estimable; no.: number; Peto OR: Peto odds ratio; vs.: versus

## Supplement 6g. General adverse events/ other symptoms

| Adverse event                             | Comparison 1 vs. Comparison 2   | Subgroup          | No. of studies | Comparison 1 – no. of patients with events/total no. of patients | Comparison 2 – no. of patients with events/total no. of patients | RD (95% CI)         | I <sup>2</sup> (%) | Peto OR (95% CI)  | I <sup>2</sup> (%) |
|-------------------------------------------|---------------------------------|-------------------|----------------|------------------------------------------------------------------|------------------------------------------------------------------|---------------------|--------------------|-------------------|--------------------|
| General complaints <sup>1</sup> , overall | Systemic vs. placebo            | All bronchiolitis | 2              | 38/446                                                           | 38/423                                                           | 0.00 (-0.04, 0.04)  | 0                  | 1.00 (0.62, 1.60) | 0                  |
| General complaints, by dose               | Systemic vs. placebo            | Single dose       | 1              | 0/46                                                             | 0/23                                                             | 0.00 (-0.09, 0.09)  | 0                  | NA                | NA                 |
|                                           | Systemic vs. placebo            | Multi-dose        | 1              | 38/400                                                           | 38/400                                                           | 0.00 (-0.04, 0.04)  | 0                  | 1.00 (0.62, 1.60) | 0                  |
| General complaints <sup>2</sup> , overall | Dexamethasone vs. other steroid |                   | 2              | 3/102                                                            | 3/95                                                             | -0.01 (-0.06, 0.03) | 0                  | 0.90 (0.18, 4.61) | 11                 |
| General complaints, by condition          | Dexamethasone vs. other steroid | Asthma            | 1              | 0/56                                                             | 1/54                                                             | -0.02 (-0.07, 0.03) | NA                 | 0.13 (0.00, 6.58) | NA                 |
|                                           | Dexamethasone vs. other steroid | Croup             | 1              | 3/46                                                             | 2/41                                                             | 0.01 (-0.08, 0.11)  | NA                 | 1.29 (0.21, 7.81) | NA                 |

<sup>1</sup>Two studies reported pallor

<sup>2</sup>One study reported excessive urination; one study reported dizziness

RD: risk difference; CI: confidence interval; NA: not applicable/estimable; no.: number; Peto OR: Peto odds ratio; vs.: versus

Supplement 6h. Immune system & oncology

| Adverse event              | Comparison 1 vs. Comparison 2 | Subgroup | No. of studies | Comparison 1 –no.# of patients with events/total no. of patients | Comparison 2 – no. of patients with events/total no. of patients | RD (95% CI)        | I <sup>2</sup> (%) | Peto OR (95% CI) | I <sup>2</sup> (%) |
|----------------------------|-------------------------------|----------|----------------|------------------------------------------------------------------|------------------------------------------------------------------|--------------------|--------------------|------------------|--------------------|
| Immunosuppression, overall | Systemic vs. placebo          |          | 1              | 0/47                                                             | 0/48                                                             | 0.00 (-0.04, 0.04) | NA                 | NA               | NA                 |

RD: risk difference; CI: confidence interval; NA: not applicable/estimable; no.: number; Peto OR: Peto odds ratio; vs.: versus

peer review only

## Supplement 6. Studies reporting no adverse events

| Study                       | Condition                      | Comparisons - main                 | Study design | Study sample | AE reporting                                                                                                                                                                                                                                                                                    |
|-----------------------------|--------------------------------|------------------------------------|--------------|--------------|-------------------------------------------------------------------------------------------------------------------------------------------------------------------------------------------------------------------------------------------------------------------------------------------------|
| <b>Alansari 2013</b>        | bronchiolitis                  | systemic vs. placebo               | RCT          | 200          | No AE overall;<br>7 days follow-up revealed no side effect concerns in treatment groups.                                                                                                                                                                                                        |
| <b>Brunette 1988</b>        | asthma, before signs of wheeze | systemic vs. systemic              | nRCT         | 32           | No AE overall;<br>Growth and weight gains for all children were within normal range.                                                                                                                                                                                                            |
| <b>Chen 2008</b>            | asthma                         | systemic vs. inhaled vs. inhaled   | RCT, 3-arm   | 123          | No AE overall;<br>All 3 groups reported no adverse effects.                                                                                                                                                                                                                                     |
| <b>Chub-Uppakarn 2007</b>   | croup                          | systemic vs. systemic              | RCT          | 41           | No AE overall;<br>No significant adverse reaction from dexamethasone treatment in either group.                                                                                                                                                                                                 |
| <b>Escobedo Chavez 1992</b> | asthma                         | systemic vs. non-corticosteroid    | RCT          | 50           | No AE overall;<br>We detected no side effects from the use of methylprednisolone in a single dose.                                                                                                                                                                                              |
| <b>Fifoot 2007</b>          | croup                          | systemic vs. systemic vs. systemic | RCT, 3-arm   | 99           | No AE overall;<br>One patient in each group vomited their first dose of medication; all except one (dexamethasone 0.6mg/kg) tolerated their repeat dose;<br>no patient suffered any adverse outcomes from receiving study steroid, either at index presentation or during the follow-up period. |



|                           |                                   |                                    |            |     |                                                                                                                                |
|---------------------------|-----------------------------------|------------------------------------|------------|-----|--------------------------------------------------------------------------------------------------------------------------------|
| <b>Ghirga 2002</b>        | wheeze - recurrent, early in URTI | inhaled vs. no intervention        | RCT        | 26  | No AE overall;<br>No apparent adverse effects reported 4 years post-study.                                                     |
| <b>Husby 1993</b>         | croup                             | inhaled vs. placebo                | RCT        | 36  | No AE overall;<br>No side effects were reported.                                                                               |
| <b>Jartti 2006</b>        | wheeze - acute                    | systemic vs. placebo               | RCT        | 78  | No AE overall;<br>Prednisolone treatment well tolerated; no clinically significant adverse effects occurred.                   |
| <b>Jartti 2007</b>        | wheeze - recurrent                | systemic vs. placebo               | RCT        | 58  | No AE overall;<br>Prednisolone treatment well tolerated; no clinically significant adverse effects occurred.                   |
| <b>Klassen 1994</b>       | croup                             | inhaled vs. placebo                | RCT        | 54  | One patient in placebo group had a burning sensation on the face. No adverse events noted in budesonide group.                 |
| <b>Langton Hewer 1998</b> | asthma                            | systemic vs. systemic vs. systemic | RCT, 3-arm | 98  | No AE overall;<br>No side effect possibly attributable to prednisolone therapy was noted in any of the three treatment groups. |
| <b>Leipzig 1979</b>       | croup                             | systemic vs. placebo               | RCT        | 30  | No AE overall;<br>Observed no adverse effects or late relapses.                                                                |
| <b>Razi 2015</b>          | asthma                            | inhaled vs. placebo                | RCT        | 100 | No AE overall;<br>No drug-related adverse effects were identified during hospitalization.                                      |
| <b>Roorda 1998</b>        | croup                             | inhaled vs. placebo                | RCT        | 17  | No AE overall;<br>No side effects of treatment regimens were reported.                                                         |

|                     |                                   |                                                                     |          |     |                                                                                                                                                                                                                   |
|---------------------|-----------------------------------|---------------------------------------------------------------------|----------|-----|-------------------------------------------------------------------------------------------------------------------------------------------------------------------------------------------------------------------|
| <b>Saito 2017</b>   | asthma                            | systemic vs. inhaled                                                | RCT      | 50  | No AE overall;<br>Adverse events did not occur in either group;<br>Serum cortisol levels on the 4th day of hospitalization were 17.0mcg/dL and 10.9mcg/dL with significant suppression in the prednisolone group. |
| <b>Schuh 2009</b>   | asthma                            | systemic vs. non-corticosteroid                                     | RCT      | 130 | No AE overall;<br>No adverse effects developed in children given prednisolone after discharge.                                                                                                                    |
| <b>Sparrow 2006</b> | croup                             | systemic vs. systemic                                               | RCT      | 133 | No AE overall;<br>No adverse events in either group.                                                                                                                                                              |
| <b>Storr 1987</b>   | asthma                            | systemic vs. placebo                                                | RCT      | 140 | No AE overall;<br>There were no observed side effects related to the single prednisolone dose.                                                                                                                    |
| <b>Sung 1998</b>    | asthma                            | inhaled vs. placebo                                                 | RCT      | 44  | No AE overall;<br>No adverse effects in either group.                                                                                                                                                             |
| <b>Super 1989</b>   | croup                             | systemic vs. placebo                                                | RCT      | 33  | No AE overall;<br>Did not encounter any side effects directly attributable to dexamethasone.                                                                                                                      |
| <b>Tal 1983</b>     | wheeze - acute                    | systemic + sal;<br>systemic + placebo;<br>sal + placebo;<br>placebo | RCT, 2x2 | 32  | No AE overall;<br>No other side effects or complications were documented, aside from tremor (1 infant) as side effect of salbutamol.                                                                              |
| <b>Tamura 2008</b>  | refractory pneumonia (5 year old) | systemic                                                            | CS (#1)  | 1   | No AE overall;<br>No adverse events in any patients during steroid treatment.                                                                                                                                     |

|                         |               |                            |     |    |                                                                                                                                                                                                                                                         |
|-------------------------|---------------|----------------------------|-----|----|---------------------------------------------------------------------------------------------------------------------------------------------------------------------------------------------------------------------------------------------------------|
| <b>van Woensel 1997</b> | bronchiolitis | systemic vs. placebo       | RCT | 54 | No AE overall;<br>No clinically significant side effects of prednisolone were found.                                                                                                                                                                    |
| <b>Webb 1986</b>        | wheeze        | systemic vs. placebo       | RCT | 38 | No AE overall;<br>No side effects reported by parents and none detected on clinical exam 3 days after completing 5-day treatment course.                                                                                                                |
| <b>Zhang 2003</b>       | bronchiolitis | systemic vs. standard care | RCT | 52 | No AE overall;<br>Potential side-effects of prednisolone not included as outcome measures in this study as short-term steroid therapy has been well confirmed. At time of analysis, no adverse events were noted in patients who received prednisolone. |

AE: adverse events; CS: case series; nRCT: non-randomised controlled trial; RCT: randomised controlled trial; sal: salbutamol; URTI: upper respiratory tract infection; vs: versus

| Section/<br>topic<br>(page no) | Item | PRISMA checklist item                                                                                                                                                                                                                                                                                       | PRISMA harms<br>(minimum)                                                                   | Recommendations<br>for reporting<br>harms in<br>systematic reviews<br>(desirable)                                                                                                                                                      | Check if done                                                    |
|--------------------------------|------|-------------------------------------------------------------------------------------------------------------------------------------------------------------------------------------------------------------------------------------------------------------------------------------------------------------|---------------------------------------------------------------------------------------------|----------------------------------------------------------------------------------------------------------------------------------------------------------------------------------------------------------------------------------------|------------------------------------------------------------------|
| <b>Title</b>                   |      |                                                                                                                                                                                                                                                                                                             |                                                                                             |                                                                                                                                                                                                                                        |                                                                  |
| Title (3)                      | 1    | Identify the report as a systematic review, meta-analysis, or both.                                                                                                                                                                                                                                         | Specifically mention “harms” or other related terms, or the harm of interest in the review. | —                                                                                                                                                                                                                                      | Title page, p. 1-2                                               |
| <b>Abstract</b>                |      |                                                                                                                                                                                                                                                                                                             |                                                                                             |                                                                                                                                                                                                                                        |                                                                  |
| Structured summary (4)         | 2    | Provide a structured summary including, as applicable: background; objectives; data sources; study eligibility criteria, participants, and interventions; study appraisal and synthesis methods; results; limitations; conclusions and implications of key findings; systematic review registration number. | —                                                                                           | Abstracts should report any analysis of harms undertaken in the review, if harms are a primary or secondary outcome.                                                                                                                   | p. 3                                                             |
| <b>Introduction</b>            |      |                                                                                                                                                                                                                                                                                                             |                                                                                             |                                                                                                                                                                                                                                        |                                                                  |
| Rationale (5)                  | 3    | Describe the rationale for the review in the context of what is already known.                                                                                                                                                                                                                              | —                                                                                           | It should clearly describe in introduction or in methods section which events are considered harms and provide a clear rationale for the specific harm(s), condition(s), and patient group(s) included in the review.                  | p. 4                                                             |
| Objectives (5)                 | 4    | Provide an explicit statement of questions being addressed with reference to participants, interventions, comparisons, outcomes, and study design (PICOS).                                                                                                                                                  | —                                                                                           | PICOS format should be specified, although in systematic reviews of harms the selection criteria for P, C, and O may be very broad (same intervention may have been used for heterogeneous indications in a diverse range of patients) | p. 5                                                             |
| <b>Methods</b>                 |      |                                                                                                                                                                                                                                                                                                             |                                                                                             |                                                                                                                                                                                                                                        |                                                                  |
| Protocol and registration (6)  | 5    | Indicate if a review protocol exists, if and where it can be accessed (eg, web address), and, if available, provide registration information including registration number.                                                                                                                                 | —                                                                                           | No specific additional information is required for systematic reviews of harms.                                                                                                                                                        | p. 5;<br>protocol reference # reported in funding source (p. 20) |
| Eligibility criteria (6)       | 6    | Specify study characteristics (eg, PICOS, length of follow-up) and report characteristics (eg, years considered, language, publication                                                                                                                                                                      | —                                                                                           | Report how handled relevant studies (based on population and intervention) when the                                                                                                                                                    | p. 5-6;                                                          |

|    |                |    |                                           |   |                              |                      |
|----|----------------|----|-------------------------------------------|---|------------------------------|----------------------|
| 1  |                |    |                                           |   |                              |                      |
| 2  |                |    |                                           |   |                              |                      |
| 3  |                |    | status) used as criteria for eligibility, |   | outcomes of interest         | Supplement 2 -       |
| 4  |                |    | giving rationale.                         |   | were not reported.           | Eligibility criteria |
| 5  |                |    |                                           |   | Report choices for           | for study inclusion  |
| 6  |                |    |                                           |   | specific study designs       |                      |
| 7  |                |    |                                           |   | and length of follow-up.     |                      |
| 8  | Information    | 7  | Describe all information sources (eg,     | — | Report if only searched      | p. 5;                |
| 9  | sources (7)    |    | databases with dates of coverage,         |   | for published data, or       |                      |
| 10 |                |    | contact with study authors to identify    |   | also sought data from        | Supplement 1 -       |
| 11 |                |    | additional studies) in the search and     |   | unpublished sources,         | Search strategy      |
| 12 |                |    | date last searched.                       |   | from authors, drug           |                      |
| 13 |                |    |                                           |   | manufacturers and            |                      |
| 14 |                |    |                                           |   | regulatory agencies. If      |                      |
| 15 |                |    |                                           |   | includes unpublished         |                      |
| 16 |                |    |                                           |   | data, provide the source     |                      |
| 17 |                |    |                                           |   | and the process of           |                      |
| 18 | Search (7)     | 8  | Present full electronic search strategy   | — | obtaining it.                | Supplement 1 -       |
| 19 |                |    | for at least one database, including      |   | If additional searches       | Search strategy      |
| 20 |                |    | any limits used, such that it could be    |   | were used specifically       |                      |
| 21 |                |    | repeated.                                 |   | to identify adverse          |                      |
| 22 |                |    |                                           |   | events, authors should       |                      |
| 23 |                |    |                                           |   | present the full search      |                      |
| 24 |                |    |                                           |   | process so it can be         |                      |
| 25 | Study          | 9  | State the process for selecting studies   | — | replicated.                  | p. 6;                |
| 26 | selection (8)  |    | (ie, screening, eligibility, included in  |   | If only included studies     |                      |
| 27 |                |    | systematic review, and, if applicable,    |   | reporting on adverse         | Supplement 2 -       |
| 28 |                |    | included in the meta-analysis).           |   | events of interest,          | Eligibility criteria |
| 29 |                |    |                                           |   | defined if screening was     | for study inclusion  |
| 30 |                |    |                                           |   | based on adverse event       |                      |
| 31 |                |    |                                           |   | reporting in                 |                      |
| 32 |                |    |                                           |   | title/abstract or full text. |                      |
| 33 |                |    |                                           |   | If no harms reported in      |                      |
| 34 |                |    |                                           |   | the text, report if any      |                      |
| 35 |                |    |                                           |   | attempt was made to          |                      |
| 36 | Data           | 10 | Describe method of data extraction        | — | retrieve relevant data       | p. 6-7               |
| 37 | collection     |    | from reports (eg, piloted forms,          |   | from authors.                |                      |
| 38 | process (9)    |    | independently, in duplicate) and any      |   | No specific additional       |                      |
| 39 |                |    | processes for obtaining and               |   | information is required      |                      |
| 40 |                |    | confirming data from investigators.       |   | for systematic reviews       |                      |
| 41 | Data items (9) | 11 | List and define all variables for which   | — | of harms.                    |                      |
| 42 |                |    | data were sought (eg, PICOS, funding      |   | Report the definition of     | p. 6-7               |
| 43 |                |    | sources) and any assumptions and          |   | the harm and                 |                      |
| 44 |                |    | simplifications made.                     |   | seriousness used by          |                      |
| 45 |                |    |                                           |   | each included study (if      |                      |
| 46 |                |    |                                           |   | applicable). Report if       |                      |
| 47 |                |    |                                           |   | multiple events              |                      |
| 48 |                |    |                                           |   | occurred in the same         |                      |
| 49 |                |    |                                           |   | individuals, if this         |                      |
| 50 |                |    |                                           |   | information is available.    |                      |
| 51 |                |    |                                           |   | Consider if the harm         |                      |
| 52 |                |    |                                           |   | may be related to            |                      |
| 53 |                |    |                                           |   | factors associated with      |                      |
| 54 |                |    |                                           |   | participants (eg, age,       |                      |
| 55 |                |    |                                           |   | sex, use of medications)     |                      |
| 56 |                |    |                                           |   | or provider (eg, years of    |                      |
| 57 |                |    |                                           |   | practice, level of           |                      |
| 58 |                |    |                                           |   |                              |                      |
| 59 |                |    |                                           |   |                              |                      |
| 60 |                |    |                                           |   |                              |                      |

|    |                 |    |                                         |                      |                          |
|----|-----------------|----|-----------------------------------------|----------------------|--------------------------|
| 1  |                 |    |                                         |                      |                          |
| 2  |                 |    |                                         |                      |                          |
| 3  |                 |    |                                         |                      |                          |
| 4  |                 |    |                                         |                      | training). Specify if    |
| 5  |                 |    |                                         |                      | information was          |
| 6  |                 |    |                                         |                      | extracted and how it     |
| 7  |                 |    |                                         |                      | was used in subsequent   |
| 8  |                 |    |                                         |                      | results. Specify if      |
| 9  |                 |    |                                         |                      | extracted details        |
| 10 |                 |    |                                         |                      | regarding the specific   |
| 11 |                 |    |                                         |                      | methods used to capture  |
| 12 |                 |    |                                         |                      | harms (active/passive    |
| 13 |                 |    |                                         |                      | and timing of adverse    |
| 14 | Risk of bias in | 12 | Describe methods used for assessing     | —                    | The risk of bias         |
| 15 | individual      |    | risk of bias of individual studies      |                      | assessment should be     |
| 16 | studies (10)    |    | (including specification of whether     |                      | considered separately    |
| 17 |                 |    | this was done at the study or outcome   |                      | for outcomes of benefit  |
| 18 |                 |    | level), and how this information is to  |                      | and harms.               |
| 19 | Summary         | 13 | State the principal summary measures    | —                    | No specific additional   |
| 20 | measures (11)   |    | (eg, risk ratio, difference in means).  |                      | information is required  |
| 21 |                 |    |                                         |                      | for systematic reviews   |
| 22 |                 |    |                                         |                      | of harms.                |
| 23 | Synthesis of    | 14 | Describe the methods of handling data   | Specify how zero     |                          |
| 24 | results (11)    |    | and combining results of studies, if    | events were handled, | p. 7-8                   |
| 25 |                 |    | done, including measures of             | if relevant.         |                          |
| 26 |                 |    | consistency (eg, $I^2$ ) for each meta- |                      |                          |
| 27 |                 |    | analysis.                               |                      |                          |
| 28 | Risk of bias    | 15 | Specify any assessment of risk of bias  | —                    | Present the extent of    |
| 29 | across studies  |    | that may affect the cumulative          |                      | missing information      |
| 30 | (11)            |    | evidence (eg, publication bias,         |                      | (studies without harms   |
| 31 |                 |    | selective reporting within studies).    |                      | outcomes), any factors   |
| 32 |                 |    |                                         |                      | that may account for     |
| 33 |                 |    |                                         |                      | their absence, and       |
| 34 |                 |    |                                         |                      | whether these reasons    |
| 35 |                 |    |                                         |                      | may be related to the    |
| 36 | Additional      | 16 | Describe methods of additional          | —                    | Sensitivity analyses     |
| 37 | analyses (12)   |    | analyses (eg, sensitivity or subgroup   |                      | may be affected by       |
| 38 |                 |    | analyses, meta-regression), if done,    |                      | different definitions,   |
| 39 |                 |    | indicating which were prespecified.     |                      | grading, and attribution |
| 40 |                 |    |                                         |                      | of adverse events, as    |
| 41 |                 |    |                                         |                      | adverse events are       |
| 42 |                 |    |                                         |                      | typically infrequent or  |
| 43 |                 |    |                                         |                      | reported using           |
| 44 |                 |    |                                         |                      | heterogeneous            |
| 45 |                 |    |                                         |                      | classifications. Report  |
| 46 |                 |    |                                         |                      | the number of            |
| 47 |                 |    |                                         |                      | participants and studies |
| 48 |                 |    |                                         |                      | included in each         |
| 49 |                 |    |                                         |                      | subgroup.                |
| 50 | <b>Results</b>  |    |                                         |                      |                          |
| 51 | Study           | 17 | Give numbers of studies screened,       | —                    | If a review addresses    |
| 52 | selection (13)  |    | assessed for eligibility, and included  |                      | both efficacy and        |
| 53 |                 |    | in the review, with reasons for         |                      | harms, display a flow    |
| 54 |                 |    | exclusions at each stage, ideally with  |                      | diagram specific for     |
| 55 |                 |    | a flow diagram.                         |                      | each (efficacy and       |
| 56 |                 |    |                                         |                      | harm).                   |
| 57 |                 |    |                                         |                      |                          |
| 58 |                 |    |                                         |                      |                          |
| 59 |                 |    |                                         |                      |                          |
| 60 |                 |    |                                         |                      |                          |

|    |                                    |    |                                                                                                                                                                                                          |                                                                                                                    |                                                                                                                                                                                                                                                                                                                                          |                                                                                                                                                                                                                                                                     |
|----|------------------------------------|----|----------------------------------------------------------------------------------------------------------------------------------------------------------------------------------------------------------|--------------------------------------------------------------------------------------------------------------------|------------------------------------------------------------------------------------------------------------------------------------------------------------------------------------------------------------------------------------------------------------------------------------------------------------------------------------------|---------------------------------------------------------------------------------------------------------------------------------------------------------------------------------------------------------------------------------------------------------------------|
| 1  |                                    |    |                                                                                                                                                                                                          |                                                                                                                    |                                                                                                                                                                                                                                                                                                                                          |                                                                                                                                                                                                                                                                     |
| 2  |                                    |    |                                                                                                                                                                                                          |                                                                                                                    |                                                                                                                                                                                                                                                                                                                                          |                                                                                                                                                                                                                                                                     |
| 3  | Study characteristics (14)         | 18 | For each study, present characteristics for which data were extracted (eg, study size, PICOS, follow-up period) and provide the citations.                                                               | Define each harm addressed, how it was ascertained (eg, patient report, active search), and over what time period. | Add additional characteristics to: "P" (population) patient risk factors that were considered as possibly affecting the risk of the harm outcome. "I" (intervention) professional expertise/skills if relevant (for example if the intervention is a procedure). "T" (time) timing of all harms assessments and the length of follow-up. | p. 8;<br>Supplement 3 - Characteristics of included studies                                                                                                                                                                                                         |
| 4  |                                    |    |                                                                                                                                                                                                          |                                                                                                                    |                                                                                                                                                                                                                                                                                                                                          |                                                                                                                                                                                                                                                                     |
| 5  |                                    |    |                                                                                                                                                                                                          |                                                                                                                    |                                                                                                                                                                                                                                                                                                                                          |                                                                                                                                                                                                                                                                     |
| 6  |                                    |    |                                                                                                                                                                                                          |                                                                                                                    |                                                                                                                                                                                                                                                                                                                                          |                                                                                                                                                                                                                                                                     |
| 7  |                                    |    |                                                                                                                                                                                                          |                                                                                                                    |                                                                                                                                                                                                                                                                                                                                          |                                                                                                                                                                                                                                                                     |
| 8  |                                    |    |                                                                                                                                                                                                          |                                                                                                                    |                                                                                                                                                                                                                                                                                                                                          |                                                                                                                                                                                                                                                                     |
| 9  |                                    |    |                                                                                                                                                                                                          |                                                                                                                    |                                                                                                                                                                                                                                                                                                                                          |                                                                                                                                                                                                                                                                     |
| 10 |                                    |    |                                                                                                                                                                                                          |                                                                                                                    |                                                                                                                                                                                                                                                                                                                                          |                                                                                                                                                                                                                                                                     |
| 11 |                                    |    |                                                                                                                                                                                                          |                                                                                                                    |                                                                                                                                                                                                                                                                                                                                          |                                                                                                                                                                                                                                                                     |
| 12 |                                    |    |                                                                                                                                                                                                          |                                                                                                                    |                                                                                                                                                                                                                                                                                                                                          |                                                                                                                                                                                                                                                                     |
| 13 |                                    |    |                                                                                                                                                                                                          |                                                                                                                    |                                                                                                                                                                                                                                                                                                                                          |                                                                                                                                                                                                                                                                     |
| 14 |                                    |    |                                                                                                                                                                                                          |                                                                                                                    |                                                                                                                                                                                                                                                                                                                                          |                                                                                                                                                                                                                                                                     |
| 15 |                                    |    |                                                                                                                                                                                                          |                                                                                                                    |                                                                                                                                                                                                                                                                                                                                          |                                                                                                                                                                                                                                                                     |
| 16 |                                    |    |                                                                                                                                                                                                          |                                                                                                                    |                                                                                                                                                                                                                                                                                                                                          |                                                                                                                                                                                                                                                                     |
| 17 |                                    |    |                                                                                                                                                                                                          |                                                                                                                    |                                                                                                                                                                                                                                                                                                                                          |                                                                                                                                                                                                                                                                     |
| 18 | Risk of bias within studies (15)   | 19 | Present data on risk of bias of each study and, if available, any outcome level assessment (see item 12).                                                                                                | —                                                                                                                  | Consider the possible sources of biases that could affect the specific harm under consideration within the review. Sample selection, dropouts and measurement of adverse events should be evaluated separately from the outcomes of benefit as described in item 12, above.                                                              | p. 8;<br>Supplement 4 - Methodological quality of included studies                                                                                                                                                                                                  |
| 19 |                                    |    |                                                                                                                                                                                                          |                                                                                                                    |                                                                                                                                                                                                                                                                                                                                          |                                                                                                                                                                                                                                                                     |
| 20 |                                    |    |                                                                                                                                                                                                          |                                                                                                                    |                                                                                                                                                                                                                                                                                                                                          |                                                                                                                                                                                                                                                                     |
| 21 |                                    |    |                                                                                                                                                                                                          |                                                                                                                    |                                                                                                                                                                                                                                                                                                                                          |                                                                                                                                                                                                                                                                     |
| 22 |                                    |    |                                                                                                                                                                                                          |                                                                                                                    |                                                                                                                                                                                                                                                                                                                                          |                                                                                                                                                                                                                                                                     |
| 23 |                                    |    |                                                                                                                                                                                                          |                                                                                                                    |                                                                                                                                                                                                                                                                                                                                          |                                                                                                                                                                                                                                                                     |
| 24 |                                    |    |                                                                                                                                                                                                          |                                                                                                                    |                                                                                                                                                                                                                                                                                                                                          |                                                                                                                                                                                                                                                                     |
| 25 |                                    |    |                                                                                                                                                                                                          |                                                                                                                    |                                                                                                                                                                                                                                                                                                                                          |                                                                                                                                                                                                                                                                     |
| 26 |                                    |    |                                                                                                                                                                                                          |                                                                                                                    |                                                                                                                                                                                                                                                                                                                                          |                                                                                                                                                                                                                                                                     |
| 27 |                                    |    |                                                                                                                                                                                                          |                                                                                                                    |                                                                                                                                                                                                                                                                                                                                          |                                                                                                                                                                                                                                                                     |
| 28 |                                    |    |                                                                                                                                                                                                          |                                                                                                                    |                                                                                                                                                                                                                                                                                                                                          |                                                                                                                                                                                                                                                                     |
| 29 |                                    |    |                                                                                                                                                                                                          |                                                                                                                    |                                                                                                                                                                                                                                                                                                                                          |                                                                                                                                                                                                                                                                     |
| 30 |                                    |    |                                                                                                                                                                                                          |                                                                                                                    |                                                                                                                                                                                                                                                                                                                                          |                                                                                                                                                                                                                                                                     |
| 31 | Results of individual studies (16) | 20 | For all outcomes considered (benefits or harms), present, for each study: (a) simple summary data for each intervention group (b) effect estimates and confidence intervals, ideally with a forest plot. | —                                                                                                                  | Report the actual numbers of adverse events in each study, separately for each intervention.                                                                                                                                                                                                                                             | p. 8;<br>Supplement 3 - Characteristics of included studies                                                                                                                                                                                                         |
| 32 |                                    |    |                                                                                                                                                                                                          |                                                                                                                    |                                                                                                                                                                                                                                                                                                                                          |                                                                                                                                                                                                                                                                     |
| 33 |                                    |    |                                                                                                                                                                                                          |                                                                                                                    |                                                                                                                                                                                                                                                                                                                                          |                                                                                                                                                                                                                                                                     |
| 34 |                                    |    |                                                                                                                                                                                                          |                                                                                                                    |                                                                                                                                                                                                                                                                                                                                          |                                                                                                                                                                                                                                                                     |
| 35 |                                    |    |                                                                                                                                                                                                          |                                                                                                                    |                                                                                                                                                                                                                                                                                                                                          |                                                                                                                                                                                                                                                                     |
| 36 | Synthesis of results (17)          | 21 | Present results of each meta-analysis done, including confidence intervals and measures of consistency.                                                                                                  | Describe any assessment of possible causality.                                                                     | If included data from unpublished sources, report clearly the data source and the impact of these studies to the final systematic review.                                                                                                                                                                                                | p. 8-14;<br>Table 1 - Number of studies and participants reporting adverse events;<br>Figures 2-4 - Forest plots of adverse events;<br>Supplement 5 - Effect estimates for all adverse events with subgroups;<br>Supplement 6 - Studies reporting no adverse events |
| 37 |                                    |    |                                                                                                                                                                                                          |                                                                                                                    |                                                                                                                                                                                                                                                                                                                                          |                                                                                                                                                                                                                                                                     |
| 38 |                                    |    |                                                                                                                                                                                                          |                                                                                                                    |                                                                                                                                                                                                                                                                                                                                          |                                                                                                                                                                                                                                                                     |
| 39 |                                    |    |                                                                                                                                                                                                          |                                                                                                                    |                                                                                                                                                                                                                                                                                                                                          |                                                                                                                                                                                                                                                                     |
| 40 |                                    |    |                                                                                                                                                                                                          |                                                                                                                    |                                                                                                                                                                                                                                                                                                                                          |                                                                                                                                                                                                                                                                     |
| 41 |                                    |    |                                                                                                                                                                                                          |                                                                                                                    |                                                                                                                                                                                                                                                                                                                                          |                                                                                                                                                                                                                                                                     |
| 42 |                                    |    |                                                                                                                                                                                                          |                                                                                                                    |                                                                                                                                                                                                                                                                                                                                          |                                                                                                                                                                                                                                                                     |
| 43 |                                    |    |                                                                                                                                                                                                          |                                                                                                                    |                                                                                                                                                                                                                                                                                                                                          |                                                                                                                                                                                                                                                                     |
| 44 |                                    |    |                                                                                                                                                                                                          |                                                                                                                    |                                                                                                                                                                                                                                                                                                                                          |                                                                                                                                                                                                                                                                     |
| 45 |                                    |    |                                                                                                                                                                                                          |                                                                                                                    |                                                                                                                                                                                                                                                                                                                                          |                                                                                                                                                                                                                                                                     |
| 46 |                                    |    |                                                                                                                                                                                                          |                                                                                                                    |                                                                                                                                                                                                                                                                                                                                          |                                                                                                                                                                                                                                                                     |
| 47 |                                    |    |                                                                                                                                                                                                          |                                                                                                                    |                                                                                                                                                                                                                                                                                                                                          |                                                                                                                                                                                                                                                                     |
| 48 |                                    |    |                                                                                                                                                                                                          |                                                                                                                    |                                                                                                                                                                                                                                                                                                                                          |                                                                                                                                                                                                                                                                     |
| 49 |                                    |    |                                                                                                                                                                                                          |                                                                                                                    |                                                                                                                                                                                                                                                                                                                                          |                                                                                                                                                                                                                                                                     |
| 50 |                                    |    |                                                                                                                                                                                                          |                                                                                                                    |                                                                                                                                                                                                                                                                                                                                          |                                                                                                                                                                                                                                                                     |
| 51 |                                    |    |                                                                                                                                                                                                          |                                                                                                                    |                                                                                                                                                                                                                                                                                                                                          |                                                                                                                                                                                                                                                                     |
| 52 |                                    |    |                                                                                                                                                                                                          |                                                                                                                    |                                                                                                                                                                                                                                                                                                                                          |                                                                                                                                                                                                                                                                     |
| 53 |                                    |    |                                                                                                                                                                                                          |                                                                                                                    |                                                                                                                                                                                                                                                                                                                                          |                                                                                                                                                                                                                                                                     |
| 54 |                                    |    |                                                                                                                                                                                                          |                                                                                                                    |                                                                                                                                                                                                                                                                                                                                          |                                                                                                                                                                                                                                                                     |
| 55 |                                    |    |                                                                                                                                                                                                          |                                                                                                                    |                                                                                                                                                                                                                                                                                                                                          |                                                                                                                                                                                                                                                                     |
| 56 |                                    |    |                                                                                                                                                                                                          |                                                                                                                    |                                                                                                                                                                                                                                                                                                                                          |                                                                                                                                                                                                                                                                     |
| 57 |                                    |    |                                                                                                                                                                                                          |                                                                                                                    |                                                                                                                                                                                                                                                                                                                                          |                                                                                                                                                                                                                                                                     |
| 58 |                                    |    |                                                                                                                                                                                                          |                                                                                                                    |                                                                                                                                                                                                                                                                                                                                          |                                                                                                                                                                                                                                                                     |
| 59 |                                    |    |                                                                                                                                                                                                          |                                                                                                                    |                                                                                                                                                                                                                                                                                                                                          |                                                                                                                                                                                                                                                                     |
| 60 |                                    |    |                                                                                                                                                                                                          |                                                                                                                    |                                                                                                                                                                                                                                                                                                                                          |                                                                                                                                                                                                                                                                     |

|    |                   |    |                                               |   |                           |                     |
|----|-------------------|----|-----------------------------------------------|---|---------------------------|---------------------|
| 1  |                   |    |                                               |   |                           |                     |
| 2  |                   |    |                                               |   |                           |                     |
| 3  | Risk of bias      | 22 | Present results of any assessment of          | — | No specific additional    | p. 8;               |
| 4  | across studies    |    | risk of bias across studies (see item         |   | information is required   | Supplement 4 -      |
| 5  | (18)              |    | 15).                                          |   | for systematic reviews    | Methodological      |
| 6  |                   |    |                                               |   | of harms. See item 15     | quality of included |
| 7  |                   |    |                                               |   | above.                    | studies             |
| 8  |                   |    |                                               |   |                           | p. 8;               |
| 9  |                   | 23 | Give results of additional analyses, if       | — | No specific additional    | Supplement 5 -      |
| 10 |                   |    | done (eg, sensitivity or subgroup             |   | information is required   | Effect estimates    |
| 11 |                   |    | analyses, meta-regression (see item           |   | for systematic reviews    | for all adverse     |
| 12 |                   |    | 16)).                                         |   | of harms.                 | events with         |
| 13 |                   |    |                                               |   |                           | subgroups           |
| 14 |                   |    |                                               |   |                           |                     |
| 15 | <b>Discussion</b> |    |                                               |   |                           |                     |
| 16 | Summary of        | 24 | Summarise the main findings including         | — | No specific additional    | p. 14-16            |
| 17 | evidence (18)     |    | the strength of evidence for each main        |   | information is required   |                     |
| 18 |                   |    | outcome; consider their relevance to key      |   | for systematic reviews    |                     |
| 19 |                   |    | groups (eg, healthcare providers, users,      |   | of harms.                 |                     |
| 20 |                   |    | and policy makers).                           |   |                           |                     |
| 21 | Limitations       | 25 | Discuss limitations at study and outcome      | — | Recognise possible        | p. 16-18            |
| 22 | (18)              |    | level (eg, risk of bias), and at review level |   | limitations of meta-      |                     |
| 23 |                   |    | (eg, incomplete retrieval of identified       |   | analysis for rare adverse |                     |
| 24 |                   |    | research, reporting bias).                    |   | events (ie, quality and   |                     |
| 25 |                   |    |                                               |   | quantity of data), issues |                     |
| 26 |                   |    |                                               |   | noted previously related  |                     |
| 27 |                   |    |                                               |   | to collection and         |                     |
| 28 |                   |    |                                               |   | reporting.                |                     |
| 29 | Conclusions       | 26 | Provide a general interpretation of the       | — | State conclusions in      | p. 18               |
| 30 | (19)              |    | results in the context of other evidence,     |   | coherence with the        |                     |
| 31 |                   |    | and implications for future research.         |   | review findings. When     |                     |
| 32 |                   |    |                                               |   | adverse events were not   |                     |
| 33 |                   |    |                                               |   | identified we caution     |                     |
| 34 |                   |    |                                               |   | against the conclusion    |                     |
| 35 |                   |    |                                               |   | that the intervention is  |                     |
| 36 |                   |    |                                               |   | “safe,” when, in reality, |                     |
| 37 |                   |    |                                               |   | its safety remains        |                     |
| 38 |                   |    |                                               |   | unknown.                  |                     |
| 39 | <b>Funding</b>    |    |                                               |   |                           |                     |
| 40 | Funding (19)      | 27 | Describe sources of funding for the           | — | No specific additional    | p. 20               |
| 41 |                   |    | systematic review and other support (eg,      |   | information is required   |                     |
| 42 |                   |    | supply of data); role of funders for the      |   | for systematic reviews    |                     |
| 43 |                   |    | systematic review.                            |   | of harms.                 |                     |
| 44 |                   |    |                                               |   |                           |                     |
| 45 |                   |    |                                               |   |                           |                     |
| 46 |                   |    |                                               |   |                           |                     |
| 47 |                   |    |                                               |   |                           |                     |
| 48 |                   |    |                                               |   |                           |                     |
| 49 |                   |    |                                               |   |                           |                     |
| 50 |                   |    |                                               |   |                           |                     |
| 51 |                   |    |                                               |   |                           |                     |
| 52 |                   |    |                                               |   |                           |                     |
| 53 |                   |    |                                               |   |                           |                     |
| 54 |                   |    |                                               |   |                           |                     |
| 55 |                   |    |                                               |   |                           |                     |
| 56 |                   |    |                                               |   |                           |                     |
| 57 |                   |    |                                               |   |                           |                     |
| 58 |                   |    |                                               |   |                           |                     |
| 59 |                   |    |                                               |   |                           |                     |
| 60 |                   |    |                                               |   |                           |                     |



# BMJ Open

## Safety of Corticosteroids in Young Children with Acute Respiratory Conditions: A Systematic Review and Meta-Analysis

|                                 |                                                                                                                                                                                                                                                                                                                                                                                                                                                                                                                                                                                                                                                                                                                                                                                                                                                                                                                                                                                                                                                                                                                                                                                                                                                                                                                                                                                                                                                                                                                                                          |
|---------------------------------|----------------------------------------------------------------------------------------------------------------------------------------------------------------------------------------------------------------------------------------------------------------------------------------------------------------------------------------------------------------------------------------------------------------------------------------------------------------------------------------------------------------------------------------------------------------------------------------------------------------------------------------------------------------------------------------------------------------------------------------------------------------------------------------------------------------------------------------------------------------------------------------------------------------------------------------------------------------------------------------------------------------------------------------------------------------------------------------------------------------------------------------------------------------------------------------------------------------------------------------------------------------------------------------------------------------------------------------------------------------------------------------------------------------------------------------------------------------------------------------------------------------------------------------------------------|
| Journal:                        | <i>BMJ Open</i>                                                                                                                                                                                                                                                                                                                                                                                                                                                                                                                                                                                                                                                                                                                                                                                                                                                                                                                                                                                                                                                                                                                                                                                                                                                                                                                                                                                                                                                                                                                                          |
| Manuscript ID                   | bmjopen-2018-028511.R1                                                                                                                                                                                                                                                                                                                                                                                                                                                                                                                                                                                                                                                                                                                                                                                                                                                                                                                                                                                                                                                                                                                                                                                                                                                                                                                                                                                                                                                                                                                                   |
| Article Type:                   | Research                                                                                                                                                                                                                                                                                                                                                                                                                                                                                                                                                                                                                                                                                                                                                                                                                                                                                                                                                                                                                                                                                                                                                                                                                                                                                                                                                                                                                                                                                                                                                 |
| Date Submitted by the Author:   | 24-Jun-2019                                                                                                                                                                                                                                                                                                                                                                                                                                                                                                                                                                                                                                                                                                                                                                                                                                                                                                                                                                                                                                                                                                                                                                                                                                                                                                                                                                                                                                                                                                                                              |
| Complete List of Authors:       | <p>Fernandes, Ricardo; Hospital de Santa Maria, Pediatrics; Laboratory of Clinical Pharmacology and Therapeutics, Faculty of Medicine, Instituto de Medicina Molecular, University of Lisbon</p> <p>Wingert, Aileen; University of Alberta Faculty of Medicine and Dentistry, Alberta Research Centre for Health Evidence</p> <p>Vandermeer, Ben; University of Alberta Faculty of Medicine &amp; Dentistry, Alberta Research Centre for Health Evidence</p> <p>Featherstone, Robin; University of Alberta Faculty of Medicine &amp; Dentistry, Alberta Research Centre for Health Evidence</p> <p>Ali, Samina; University of Alberta, Pediatrics; Women &amp; Children's Health Research Institute, Pediatrics, University of Alberta</p> <p>Plint, AMy; University of Ottawa,</p> <p>Stang, Antonia; University of Calgary, Pediatrics, Emergency Medicine, Community Health Sciences</p> <p>Rowe, Brian; University of Alberta, Emergency Medicine; University of Alberta, School of Public Health</p> <p>Johnson, David; University of Calgary Cumming School of Medicine, Pediatrics, Emergency Medicine, and Physiology and Pharmacology</p> <p>Allain, Dominic; University of Alberta, Pediatrics, Faculty of Medicine &amp; Dentistry</p> <p>Klassen, Terry; Manitoba Institute of Child Health &amp; Associate Dean of Academic, Faculty of Medicine, University of Manitoba</p> <p>Hartling, Lisa; University of Alberta, Pediatrics; University of Alberta Faculty of Medicine and Dentistry, Alberta Research Centre for Health Evidence</p> |
| <b>Primary Subject Heading</b>: | Paediatrics                                                                                                                                                                                                                                                                                                                                                                                                                                                                                                                                                                                                                                                                                                                                                                                                                                                                                                                                                                                                                                                                                                                                                                                                                                                                                                                                                                                                                                                                                                                                              |
| Secondary Subject Heading:      | Respiratory medicine                                                                                                                                                                                                                                                                                                                                                                                                                                                                                                                                                                                                                                                                                                                                                                                                                                                                                                                                                                                                                                                                                                                                                                                                                                                                                                                                                                                                                                                                                                                                     |
| Keywords:                       | corticosteroids, Asthma < THORACIC MEDICINE, bronchiolitis, croup, PAEDIATRICS, safety                                                                                                                                                                                                                                                                                                                                                                                                                                                                                                                                                                                                                                                                                                                                                                                                                                                                                                                                                                                                                                                                                                                                                                                                                                                                                                                                                                                                                                                                   |
|                                 |                                                                                                                                                                                                                                                                                                                                                                                                                                                                                                                                                                                                                                                                                                                                                                                                                                                                                                                                                                                                                                                                                                                                                                                                                                                                                                                                                                                                                                                                                                                                                          |

1  
2  
3  
4  
5  
6  
7  
8  
9  
10  
11  
12  
13  
14  
15  
16  
17  
18  
19  
20  
21  
22  
23  
24  
25  
26  
27  
28  
29  
30  
31  
32  
33  
34  
35  
36  
37  
38  
39  
40  
41  
42  
43  
44  
45  
46  
47  
48  
49  
50  
51  
52  
53  
54  
55  
56  
57  
58  
59  
60

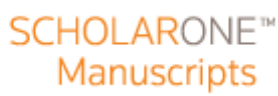

1  
2  
3 **Safety of Corticosteroids in Young Children with Acute Respiratory Conditions: A**  
4 **Systematic Review and Meta-Analysis**  
5

6 Ricardo M. Fernandes, Aileen Wingert, Ben Vandermeer, Robin Featherstone, Samina Ali, Amy  
7 C. Plint, Antonia S. Stang, Brian H. Rowe, David W. Johnson, Dominic Allain, Terry P. Klassen,  
8 Lisa Hartling  
9

10  
11 **Ricardo M. Fernandes**, Department of Pediatrics, Hospital de Santa Maria, Lisbon, Portugal;  
12 Laboratory of Clinical Pharmacology and Therapeutics, Faculty of Medicine, Instituto de  
13 Medicina Molecular, University of Lisbon, Lisbon, Portugal  
14

15  
16 **Aileen Wingert**, Alberta Research Centre for Health Evidence, Department of Pediatrics,  
17 Faculty of Medicine & Dentistry, University of Alberta, Edmonton Clinic Health Academy  
18 11405 – 87 Avenue, Edmonton, Alberta, Canada  
19

20  
21 **Ben Vandermeer**, Alberta Research Centre for Health Evidence, Department of Pediatrics,  
22 Faculty of Medicine & Dentistry, University of Alberta, Edmonton Clinic Health Academy  
23 11405 – 87 Avenue, Edmonton, Alberta, Canada  
24

25  
26 **Robin Featherstone**, Alberta Research Centre for Health Evidence, Department of Pediatrics,  
27 Faculty of Medicine & Dentistry, University of Alberta, Edmonton Clinic Health Academy  
28 11405 – 87 Avenue, Edmonton, Alberta, Canada  
29

30  
31 **Samina Ali**, Department of Pediatrics, Faculty of Medicine & Dentistry, University of Alberta,  
32 Edmonton Clinic Health Academy 11405 – 87 Avenue, Edmonton, Alberta, Canada; Women &  
33 Children's Health Research Institute, Department of Pediatrics, University of Alberta, 5-083  
34 Edmonton Clinic Health Academy 11405 – 87 Avenue, Edmonton, Alberta, Canada  
35

36  
37 **Amy C. Plint**, Department of Pediatrics, University of Ottawa, Children's Hospital of Eastern  
38 Ontario 401 Smyth Road, Ottawa, Ontario, Canada  
39

40  
41 **Antonia S. Stang**, Departments of Pediatrics, Emergency Medicine, Community Health  
42 Sciences, University of Calgary, 2500 University Drive NW, Calgary, Alberta, Canada  
43

44  
45 **Brian H. Rowe**, Department of Emergency Medicine, University of Alberta, 8440 – 112 Street  
46 NW, Edmonton, Alberta, Canada; School of Public Health, University of Alberta, Edmonton  
47 Clinic Health Academy 11405 – 87 Avenue, Edmonton, Alberta, Canada  
48

49  
50 **David W. Johnson**, Departments of Pediatrics, Emergency Medicine, and Physiology and  
51 Pharmacology, Cumming School of Medicine, University of Calgary, 2500 University Drive  
52 NW, Calgary, Alberta, Canada  
53

54  
55 **Dominic Allain**, Department of Pediatrics, Faculty of Medicine & Dentistry, University of  
56 Alberta, Edmonton Clinic Health Academy 11405 – 87 Avenue, Edmonton, Alberta, Canada  
57  
58  
59  
60

1  
2  
3 **Terry P. Klassen**, Manitoba Institute of Child Health, University of Winnipeg, Children's  
4 Hospital of Research Institute of Manitoba 513 – 715 McDermot Avenue, Winnipeg, Manitoba,  
5 Canada  
6

7  
8 **Lisa Hartling**, Alberta Research Centre for Health Evidence, Department of Pediatrics, Faculty  
9 of Medicine & Dentistry, University of Alberta, Edmonton Clinic Health Academy 11405 – 87  
10 Avenue, Edmonton, Alberta, Canada; Department of Pediatrics, Faculty of Medicine &  
11 Dentistry, University of Alberta, Edmonton Clinic Health Academy 11405 – 87 Avenue,  
12 Edmonton, Alberta, Canada  
13

14  
15  
16 **Corresponding author:** Dr. Lisa Hartling, 11405 - 87 Avenue, Edmonton, Alberta, T6G 1C9,  
17 Canada; phone: 780-492-6124; e-mail: [hartling@ualberta.ca](mailto:hartling@ualberta.ca);  
18

19 **Manuscript = 3819 words**  
20  
21  
22  
23  
24  
25  
26  
27  
28  
29  
30  
31  
32  
33  
34  
35  
36  
37  
38  
39  
40  
41  
42  
43  
44  
45  
46  
47  
48  
49  
50  
51  
52  
53  
54  
55  
56  
57  
58  
59  
60

## ABSTRACT (300 words)

**Objective** Adverse events (AEs) associated with short-term corticosteroid use for respiratory conditions in young children.

**Design** Systematic review of primary studies.

**Data sources** Medline, Cochrane CENTRAL, Embase, and regulatory agencies were searched September 2014; search was updated in 2017.

**Eligibility criteria** Children <6 years with acute respiratory condition, given inhaled (high-dose) or systemic corticosteroids up to 14 days.

**Data extraction and synthesis** One reviewer extracted with another reviewer verifying data. Study selection and methodological quality (McHarm scale) involved duplicate independent reviews. We extracted AEs reported by study authors and used a categorization model by organ systems. Meta-analyses used Peto odds ratios (pOR) and DerSimonian Laird inverse variance method utilizing Mantel-Haenszel Q statistic, with 95% confidence intervals (CI). Subgroup analyses were conducted for respiratory condition and dose.

**Results** Eighty-five studies (11,505 children) were included; 68 were randomized trials. Methodological quality was poor overall due to lack of assessment and inadequate reporting of AEs. Meta-analysis (six studies; n=1,373) found fewer cases of vomiting comparing oral dexamethasone with prednisone (pOR 0.29, 95% CI 0.17 to 0.48; I<sup>2</sup>=0%). The mean difference in change-from-baseline height after one year between inhaled corticosteroid and placebo was 0.10 cm (two studies, n=268; 95% CI -0.47, 0.67). Results from five studies with heterogeneous interventions, comparators, and measurements, were not pooled; one study found a smaller mean change in height z-score with recurrent high-dose inhaled fluticasone over one year. No significant differences were found comparing systemic or inhaled corticosteroid with placebo, or between corticosteroids, for other AEs; CIs around estimates were often wide, due to small samples and few events.

**Conclusions** Evidence suggests that short-term high-dose inhaled or systemic corticosteroids use is not associated with an increase in AEs across organ systems. Uncertainties remain, particularly for recurrent use and growth outcomes, due to low study quality, poor reporting and imprecision.

**Strengths and limitations of this study:**

- Examined safety outcomes associated with short-term corticosteroid use across multiple common acute respiratory conditions in young children
- Broad range of adverse events captured across organ systems
- Inconsistent definitions, assessments and reporting of adverse events
- Extensive variation in corticosteroid formulations and dosages within and between studies
- Did not examine long-term corticosteroid use (more than 14 days)

For peer review only

## INTRODUCTION

Corticosteroids are the cornerstone of treatment for many common pediatric respiratory conditions including croup and asthma.<sup>1-3</sup> These conditions often result in presentation to urgent and emergency care settings, in otherwise healthy children. Previous studies examining corticosteroid use in chronic asthma have demonstrated the potential for short- and long-term adverse events, particularly growth inhibition, bone disease, and adrenal suppression.<sup>4-6</sup> While corticosteroids have demonstrated effectiveness for the acute treatment of many respiratory indications, clinicians are faced with considerable uncertainty regarding short-term safety, particularly among the youngest children.<sup>1</sup>

Previous systematic reviews have examined corticosteroids in preschool or school-aged asthma or wheezing;<sup>4, 7, 8</sup> however, most focused on efficacy and were restricted to randomized controlled trials (RCTs). These reviews also focused on a specific underlying condition, disease severity, or particular corticosteroid, and mostly for longer-term administration (e.g., for recurrent, persistent or chronic asthma). Current guidance on systematic assessment of harms highlights the need to include data from observational studies when considering safety outcomes.<sup>9</sup> As well, it has been suggested that it may be useful to have a wider view of the evidence across a number of similar indications.<sup>10</sup> Recent knowledge synthesis approaches have studied specific safety outcomes across conditions to increase power, with the assumption that some safety outcomes are not confounded by condition.<sup>10</sup> Such a comprehensive approach to knowledge synthesis in this area is critical to inform treatment decisions, reduce practice variation, and optimize management of young children who seek care due to acute respiratory illness.

1  
2  
3 The goal of this study was to synthesize evidence regarding the safety of short course  
4 corticosteroid use in young children (less than six years) with acute respiratory conditions.  
5  
6  
7  
8  
9

## 10 **METHODS**

11  
12 This review followed internationally recommended methods and standards for systematic  
13 reviews.<sup>11-13</sup> An *a priori* protocol was developed (available from authors).  
14  
15  
16  
17  
18

### 19 **Patient and Public Involvement**

20  
21 Patients and/or the public were not involved in the design or conduct of this systematic review.  
22  
23  
24  
25

### 26 **Literature search**

27  
28 Original database searches were conducted September 2014 in Ovid Medline, the Cochrane  
29 Central Register of Controlled Trials (CENTRAL) via Wiley Cochrane Library, and Ovid  
30 Embase. Additional sources included regulatory agency databases: Drugs@FDA, Health  
31 Canada's Drug Products Database, and the European Medicines Agency's European Public  
32 Assessment Reports. Search strategies combined index terms and keywords for respiratory  
33 illnesses, children and drug classes identified in the Global Initiative for Asthma (GINA)<sup>14</sup>  
34 guidelines. Study design filters were applied to limit results to RCTs and observational studies.  
35  
36  
37  
38  
39  
40  
41  
42  
43  
44  
45 Update searches were executed in Medline and CENTRAL in February 2016, and then again in  
46  
47  
48  
49  
50  
51  
52  
53  
54  
55  
56  
57  
58  
59  
60  
61  
62  
63  
64  
65  
66  
67  
68  
69  
70  
71  
72  
73  
74  
75  
76  
77  
78  
79  
80  
81  
82  
83  
84  
85  
86  
87  
88  
89  
90  
91  
92  
93  
94  
95  
96  
97  
98  
99  
100  
101  
102  
103  
104  
105  
106  
107  
108  
109  
110  
111  
112  
113  
114  
115  
116  
117  
118  
119  
120  
121  
122  
123  
124  
125  
126  
127  
128  
129  
130  
131  
132  
133  
134  
135  
136  
137  
138  
139  
140  
141  
142  
143  
144  
145  
146  
147  
148  
149  
150  
151  
152  
153  
154  
155  
156  
157  
158  
159  
160  
161  
162  
163  
164  
165  
166  
167  
168  
169  
170  
171  
172  
173  
174  
175  
176  
177  
178  
179  
180  
181  
182  
183  
184  
185  
186  
187  
188  
189  
190  
191  
192  
193  
194  
195  
196  
197  
198  
199  
200  
201  
202  
203  
204  
205  
206  
207  
208  
209  
210  
211  
212  
213  
214  
215  
216  
217  
218  
219  
220  
221  
222  
223  
224  
225  
226  
227  
228  
229  
230  
231  
232  
233  
234  
235  
236  
237  
238  
239  
240  
241  
242  
243  
244  
245  
246  
247  
248  
249  
250  
251  
252  
253  
254  
255  
256  
257  
258  
259  
260  
261  
262  
263  
264  
265  
266  
267  
268  
269  
270  
271  
272  
273  
274  
275  
276  
277  
278  
279  
280  
281  
282  
283  
284  
285  
286  
287  
288  
289  
290  
291  
292  
293  
294  
295  
296  
297  
298  
299  
300  
301  
302  
303  
304  
305  
306  
307  
308  
309  
310  
311  
312  
313  
314  
315  
316  
317  
318  
319  
320  
321  
322  
323  
324  
325  
326  
327  
328  
329  
330  
331  
332  
333  
334  
335  
336  
337  
338  
339  
340  
341  
342  
343  
344  
345  
346  
347  
348  
349  
350  
351  
352  
353  
354  
355  
356  
357  
358  
359  
360  
361  
362  
363  
364  
365  
366  
367  
368  
369  
370  
371  
372  
373  
374  
375  
376  
377  
378  
379  
380  
381  
382  
383  
384  
385  
386  
387  
388  
389  
390  
391  
392  
393  
394  
395  
396  
397  
398  
399  
400  
401  
402  
403  
404  
405  
406  
407  
408  
409  
410  
411  
412  
413  
414  
415  
416  
417  
418  
419  
420  
421  
422  
423  
424  
425  
426  
427  
428  
429  
430  
431  
432  
433  
434  
435  
436  
437  
438  
439  
440  
441  
442  
443  
444  
445  
446  
447  
448  
449  
450  
451  
452  
453  
454  
455  
456  
457  
458  
459  
460  
461  
462  
463  
464  
465  
466  
467  
468  
469  
470  
471  
472  
473  
474  
475  
476  
477  
478  
479  
480  
481  
482  
483  
484  
485  
486  
487  
488  
489  
490  
491  
492  
493  
494  
495  
496  
497  
498  
499  
500  
501  
502  
503  
504  
505  
506  
507  
508  
509  
510  
511  
512  
513  
514  
515  
516  
517  
518  
519  
520  
521  
522  
523  
524  
525  
526  
527  
528  
529  
530  
531  
532  
533  
534  
535  
536  
537  
538  
539  
540  
541  
542  
543  
544  
545  
546  
547  
548  
549  
550  
551  
552  
553  
554  
555  
556  
557  
558  
559  
560  
561  
562  
563  
564  
565  
566  
567  
568  
569  
570  
571  
572  
573  
574  
575  
576  
577  
578  
579  
580  
581  
582  
583  
584  
585  
586  
587  
588  
589  
590  
591  
592  
593  
594  
595  
596  
597  
598  
599  
600  
601  
602  
603  
604  
605  
606  
607  
608  
609  
610  
611  
612  
613  
614  
615  
616  
617  
618  
619  
620  
621  
622  
623  
624  
625  
626  
627  
628  
629  
630  
631  
632  
633  
634  
635  
636  
637  
638  
639  
640  
641  
642  
643  
644  
645  
646  
647  
648  
649  
650  
651  
652  
653  
654  
655  
656  
657  
658  
659  
660  
661  
662  
663  
664  
665  
666  
667  
668  
669  
670  
671  
672  
673  
674  
675  
676  
677  
678  
679  
680  
681  
682  
683  
684  
685  
686  
687  
688  
689  
690  
691  
692  
693  
694  
695  
696  
697  
698  
699  
700  
701  
702  
703  
704  
705  
706  
707  
708  
709  
710  
711  
712  
713  
714  
715  
716  
717  
718  
719  
720  
721  
722  
723  
724  
725  
726  
727  
728  
729  
730  
731  
732  
733  
734  
735  
736  
737  
738  
739  
740  
741  
742  
743  
744  
745  
746  
747  
748  
749  
750  
751  
752  
753  
754  
755  
756  
757  
758  
759  
760  
761  
762  
763  
764  
765  
766  
767  
768  
769  
770  
771  
772  
773  
774  
775  
776  
777  
778  
779  
780  
781  
782  
783  
784  
785  
786  
787  
788  
789  
790  
791  
792  
793  
794  
795  
796  
797  
798  
799  
800  
801  
802  
803  
804  
805  
806  
807  
808  
809  
810  
811  
812  
813  
814  
815  
816  
817  
818  
819  
820  
821  
822  
823  
824  
825  
826  
827  
828  
829  
830  
831  
832  
833  
834  
835  
836  
837  
838  
839  
840  
841  
842  
843  
844  
845  
846  
847  
848  
849  
850  
851  
852  
853  
854  
855  
856  
857  
858  
859  
860  
861  
862  
863  
864  
865  
866  
867  
868  
869  
870  
871  
872  
873  
874  
875  
876  
877  
878  
879  
880  
881  
882  
883  
884  
885  
886  
887  
888  
889  
890  
891  
892  
893  
894  
895  
896  
897  
898  
899  
900  
901  
902  
903  
904  
905  
906  
907  
908  
909  
910  
911  
912  
913  
914  
915  
916  
917  
918  
919  
920  
921  
922  
923  
924  
925  
926  
927  
928  
929  
930  
931  
932  
933  
934  
935  
936  
937  
938  
939  
940  
941  
942  
943  
944  
945  
946  
947  
948  
949  
950  
951  
952  
953  
954  
955  
956  
957  
958  
959  
960  
961  
962  
963  
964  
965  
966  
967  
968  
969  
970  
971  
972  
973  
974  
975  
976  
977  
978  
979  
980  
981  
982  
983  
984  
985  
986  
987  
988  
989  
990  
991  
992  
993  
994  
995  
996  
997  
998  
999  
1000



1  
2  
3 We included primary studies involving population (P): children up to six years old; intervention  
4  
5 (I): treated with single or recurrent systemic (any dose) or high-dose inhaled (as defined by the  
6  
7 GINA guidelines<sup>14</sup>) corticosteroids for up to 14 days; comparator (C): any comparator; outcome  
8  
9 (O): any adverse event; timing (T): any timing; and, setting (S): any inpatient or outpatient  
10  
11 setting providing care to children with an acute respiratory condition. See Supplement 2 for  
12  
13 detailed eligibility criteria.  
14  
15

16  
17  
18  
19 Given the lack of standardized terminology for safety, we gathered information on all potentially  
20  
21 drug-related harm outcomes<sup>15</sup> from studies including, but not limited to: adverse drug reactions,  
22  
23 adverse drug events, medication errors, side effects and potential adverse drug events. For  
24  
25 consistency these outcomes are referred to in the manuscript as adverse events (AEs). Studies  
26  
27 that did not report or mention AEs were excluded. Due to resource constraints and mean age of  
28  
29 the studies, no attempt was made to contact study authors if no harms were reported in the text,  
30  
31 or when there was potentially missing data; such efforts are unlikely to yield additional data.  
32  
33  
34  
35  
36  
37

### 38 **Study selection**

39  
40 Two reviewers independently screened the titles and abstracts of all records using *a priori*  
41  
42 selection criteria. Full texts of potentially eligible studies were reviewed by two reviewers  
43  
44 independently using a standard form. Disagreements were resolved through consensus or  
45  
46 consultation with a third reviewer.  
47  
48  
49  
50

### 51 **Data extraction**

1  
2  
3 One reviewer extracted data using a structured form, with verification by a second reviewer.

4  
5 Data were extracted on study characteristics (design features), patient characteristics (age, sex,  
6  
7 baseline characteristics), respiratory conditions, interventions (type, dose, duration, route of  
8  
9 administration, timing, co-interventions, rescue medications), outcomes (types and timing), care  
10  
11 setting, funding sources, and results.  
12  
13

14  
15  
16  
17 AEs were extracted as reported by study authors and categorized using a published model based  
18  
19 on organ systems (see Results).<sup>16</sup> A panel of clinicians with specialties in pediatrics, emergency  
20  
21 medicine, respiratory medicine and clinical pharmacology rated each AE in order of clinical  
22  
23 severity independent of knowledge of the study results.  
24  
25  
26  
27

### 28 **Assessment of methodological quality**

29  
30  
31 Two reviewers independently assessed the methodological quality of studies using the McMaster  
32  
33 Quality Assessment Scale for Harms (McHarm)<sup>17</sup>; disagreements were resolved through  
34  
35 discussion.  
36  
37  
38  
39

### 40 **Data synthesis**

41  
42 A comparative summary of AEs for studies with more than one treatment arm was presented to  
43  
44 provide an overall picture of which interventions had a high risk of specific AEs. Risk  
45  
46 differences were pooled using the DerSimonian Laird inverse variance random effects method  
47  
48 utilizing the Mantel-Haenszel Q statistic. Binary data were also pooled using the Peto odds ratios  
49  
50 (pORs) fixed effects method.<sup>18</sup> Studies that reported at least one event in at least one treatment  
51  
52 arm were included in the analysis of pORs and all comparative studies were used for analysis of  
53  
54  
55  
56  
57

1  
2  
3 RD. One AE (growth) was reported as a continuous outcome and data were pooled using a  
4  
5 DerSimonian Laird inverse variance random effects method as a mean difference (MD; in cm).  
6  
7 The  $I^2$  statistic was presented to quantify the magnitude of statistical heterogeneity between  
8  
9 studies; while the  $I^2$  has the potential to be misinterpreted, it is the standard in the field and we  
10  
11 chose to present the statistic for informational purposes.<sup>19</sup> Subgroup analyses from study-level  
12  
13 data were conducted for respiratory condition and dose (single versus multi-dose) using  
14  
15 Cochran's Q ( $\alpha=0.05$ ) to detect statistical heterogeneity. Studies contributing no numerical data  
16  
17 for analysis (e.g., single arm studies, studies that reported no AEs overall) are summarized in  
18  
19 Supplement 3. Assessment of small-study bias (for meta-analyses with at least eight studies) was  
20  
21 planned using the funnel plot and Egger's test;<sup>20</sup> however, this was not conducted due to  
22  
23 inadequate number of studies for each outcome. Analyses were conducted using Review  
24  
25 Manager Version 5.3 (Cochrane Collaboration).<sup>21</sup> Graphs were constructed using TIBCO  
26  
27 Spotfire S+ Workbench, Version 3.4.<sup>22</sup>  
28  
29  
30  
31  
32  
33  
34

## 35 RESULTS

36  
37 Database and grey literature searches yielded 9,134 records. Eighty-six papers (85 studies)<sup>23-108</sup>  
38  
39 involving 11,505 participants were included (Figure 1). Characteristics of the included studies  
40  
41 are in Supplement 3. There was large variation in corticosteroid type, dose, duration and route of  
42  
43 administration, both for systemic and inhaled corticosteroids. Methodological quality of studies  
44  
45 was poor overall due to inadequate reporting of how AEs were defined and collected (Table 1;  
46  
47 Supplement 4).  
48  
49  
50  
51  
52  
53

## 54 Adverse events

1  
2  
3 Results below are presented according to the categories in Table 2. Figures 2, 3 and 4 display  
4 forest plots of AEs comparing systemic corticosteroid to placebo, inhaled corticosteroid to  
5 placebo, and systemic dexamethasone to another systemic corticosteroid, respectively. Results of  
6 meta-analyses and subgroup analyses are in Supplement 5, with effect estimates and 95% CIs.  
7  
8 Forest plots from meta-analyses are in Supplement 6. There was large variation in the number of  
9 studies and number of patients with available data for meta-analysis across comparisons and  
10 outcomes. Further, for four safety outcomes there were no events in both study arms (double-  
11 zero) across studies. In most cases the subgroup analyses by dose and condition did not differ  
12 substantially from the overall results. Studies reporting no AEs overall are summarized in  
13 Supplement 7.  
14  
15  
16  
17  
18  
19  
20  
21  
22  
23  
24  
25  
26  
27  
28

### 29 *Infections & Respiratory System*

30  
31 The number of studies contributing to each meta-analysis ranged from one to seven (range 58 to  
32 2,178 children). There were no statistically significant differences between: a) *systemic*  
33 *corticosteroid compared to placebo* for severe infections,<sup>30, 74, 96, 99</sup> systemic infections,<sup>30, 40, 43, 83</sup>  
34 infections of the lung/trachea,<sup>30, 40, 54, 74, 96, 98, 105</sup> and the upper respiratory tract,<sup>30, 43, 54, 65, 67, 74</sup> and  
35 voice complaints<sup>43</sup> (estimated pORs between 0.15 and 1.26) and b) *inhaled corticosteroid*  
36 *compared to placebo* for severe infections,<sup>45</sup> systemic infections,<sup>43, 45</sup> lung/trachea,<sup>45</sup> infections  
37 of the upper respiratory tract<sup>37, 44, 45, 65-67</sup> or voice complaints<sup>37, 43, 100, 101</sup> (estimated pORs  
38 between 0.54 and 1.51). No study comparing *dexamethasone with another corticosteroid*  
39 reported infections or respiratory AEs.  
40  
41  
42  
43  
44  
45  
46  
47  
48  
49  
50  
51  
52  
53

### 54 *Gastro-Intestinal Tract (GI)*

1  
2  
3 The number of studies contributing to each meta-analysis ranged from one to seven (range 97 to  
4 3,176 children). There were no statistically significant differences between: a) *systemic*  
5 *corticosteroid and placebo* for GI bleeding,<sup>30, 32, 40, 65, 83, 87, 105</sup> vomiting,<sup>30, 38, 40, 42, 70, 81, 83</sup>  
6 *abdominal pain*,<sup>30</sup> or diarrhea;<sup>42, 77, 105</sup> and b) *inhaled corticosteroid and placebo* for GI  
7 bleeding,<sup>65</sup> vomiting,<sup>37, 45, 69, 85, 101</sup> or diarrhea.<sup>37, 45</sup> Estimated pORs for both comparisons ranged  
8 from 0.89 to 1.10.  
9

10  
11  
12  
13  
14  
15  
16  
17  
18  
19  
20  
21  
22  
23  
24  
25  
26  
27  
28  
29  
30  
31  
32  
33  
34  
35  
36  
37  
38  
39  
40  
41  
42  
43  
44  
45  
46  
47  
48  
49  
50  
51  
52  
53  
54  
55  
56  
57  
58  
59  
60  
Meta-analysis of six studies (1,373 children)<sup>25, 27, 41, 49, 52, 80</sup> found fewer cases of vomiting in  
patients who received *dexamethasone compared with another corticosteroid*, although the  
number of events was small (12/663 versus 51/710 cases; pOR 0.29, 95% CI 0.17, 0.48; I<sup>2</sup>=0%).  
These studies focused on asthma (n=3),<sup>27, 41, 80</sup> croup (n=2),<sup>49, 52</sup> or both (n=1);<sup>25</sup> all compared  
oral dexamethasone with oral prednisone. No statistically significant difference was found for  
abdominal pain between *dexamethasone and another corticosteroid*.<sup>25, 27, 52</sup>

### *CNS & Behaviour Effects*

The number of studies for each meta-analysis ranged from one to five (range 70 to 1,159  
children). The estimated pORs for the *systemic corticosteroid and placebo* were 1.44 for  
tremor/jitteriness,<sup>38, 55, 70, 77, 83</sup> 1.95 for behaviour change,<sup>30, 42, 67, 77</sup> and 0.11 for headache,<sup>38</sup> with  
no statistically significant differences. There were also no differences between *inhaled*  
*corticosteroid and placebo* for behaviour change,<sup>67, 85, 101</sup> and *dexamethasone and another*  
*corticosteroid* for behaviour change,<sup>52, 57</sup> headache,<sup>27, 52</sup> or tremor/jitteriness,<sup>52</sup> the latter with an  
estimated pOR of 6.63 from a small study (n=87) with only one reported event.

### *Dermatologic Conditions*

1  
2  
3 The number of studies per meta-analysis ranged from one to four (range 32 to 1,079 children).  
4  
5 There were no statistically significant differences between: a) *systemic corticosteroid and*  
6  
7 *placebo* for rash and hives,<sup>30, 42, 67</sup> albeit with an estimated pOR of 7.59 (4/536 versus 0/543;  
8  
9 95% CI 1.07, 54.01); and b) *inhaled corticosteroid and placebo* for rash,<sup>37, 45, 85</sup> hives<sup>67</sup> and  
10  
11 burning sensation<sup>68</sup> (estimated pORs 0.88 and 0.14, respectively). No events of phlebitis were  
12  
13 reported comparing *dexamethasone to another corticosteroid*.<sup>57</sup>  
14  
15  
16  
17  
18

### 19 *Endocrine/metabolic & Musculoskeletal Systems*

20  
21 There were no statistically significant differences for electrolyte abnormalities between *systemic*  
22  
23 *corticosteroid and placebo* (estimated pOR 3.08)<sup>30, 47, 83, 102</sup> and *dexamethasone to another*  
24  
25 *corticosteroid* (estimated pOR 0.18).<sup>102</sup>  
26  
27  
28  
29  
30

31 Pooled data for linear growth between *inhaled corticosteroid and placebo* included two studies  
32  
33 (n=263) using recurrent doses for acute wheeze with follow-up at one year.<sup>28, 45</sup> The estimated  
34  
35 change-from-baseline height was small (MD 0.10 cm; 95% CI -0.47 to 0.67; I<sup>2</sup>=9%). Five  
36  
37 studies reported measurements of growth (height and weight) ranging from one to three years of  
38  
39 follow-up, which could not be pooled due to heterogeneous interventions, comparators, or  
40  
41 outcome measurements.<sup>29, 31, 45, 58, 71</sup> Three studies included data on inhaled corticosteroid versus  
42  
43 placebo. One RCT on asthma<sup>58</sup> (n=20) comparing budesonide and placebo found no signs of  
44  
45 growth retardation by height measurements at 12 months or after up to six treatments. An RCT  
46  
47 of episodic wheeze<sup>29</sup> (n=294) found height at three years of age was unaffected in children  
48  
49 receiving budesonide or placebo. One RCT of inhaled fluticasone propionate at very high doses  
50  
51 (1500 mcg daily during upper respiratory infections) versus placebo in recurrent wheeze<sup>45</sup>  
52  
53  
54  
55  
56  
57  
58  
59  
60

1  
2  
3 reported additional outcome data on height that was not pooled in the meta-analysis mentioned  
4  
5 above. There was a smaller mean change in height z score in the corticosteroid group over one  
6  
7 year (MD -0.24; 95% CI -0.40 to -0.08; adjusted results).<sup>45</sup> Furthermore, mean weight was  
8  
9 significantly lower at one-year follow-up in the fluticasone group (n=62) versus placebo (n=67);  
10  
11 two children given fluticasone and one given placebo met criteria for 'failure to thrive'.<sup>45</sup> Finally,  
12  
13 two small trials did not report group differences for other comparisons: total and mean height  
14  
15 growth (at eight to 19 months) for intravenous (IV) dexamethasone versus inhaled budesonide in  
16  
17 asthma (n=18);<sup>71</sup> weight and height gains at two years for theophylline and metaproterenol with  
18  
19 or without systemic prednisone on prevention of wheeze during upper respiratory infections in  
20  
21 asthma (n=32).<sup>31</sup>  
22  
23  
24  
25  
26  
27

28  
29 Five studies reported on adrenal function/suppression, with few children contributing data for  
30  
31 this outcome.<sup>45, 57, 58, 71, 89</sup> The RCT of high-dose inhaled fluticasone propionate versus placebo  
32  
33 (99 children with data)<sup>45</sup> found no significant differences between groups in basal cortisol  
34  
35 (baseline and 12 months). Another RCT in asthma reported no differences in serum cortisol and  
36  
37 urinary cortisol/creatinine after 10 days of inhaled budesonide or placebo (16 children with data).  
38  
39 A subgroup who received oral betamethasone (n=9) showed significant changes from baseline  
40  
41 after three days, but no differences at 12 to 14 days.<sup>58</sup> Two studies included comparisons  
42  
43 between different corticosteroids. One RCT<sup>89</sup> in acute asthma compared IV prednisolone (n=20)  
44  
45 with nebulized budesonide (n=30) and found significant levels of suppressed serum cortisol in  
46  
47 the prednisolone group, albeit not considered pathologic by the study authors. Although another  
48  
49 RCT<sup>57</sup> comparing intramuscular (IM) dexamethasone with oral prednisone for asthma (n=32)  
50  
51 found lower median urinary cortisol/creatinine in the former group at day 14, there was no  
52  
53  
54  
55  
56  
57  
58  
59  
60

1  
2  
3 statistically significant difference. An RCT<sup>71</sup> comparing IV dexamethasone (n=9) with inhaled  
4 budesonide (n=9) found no significant differences between groups from baseline for blood  
5 pressure and blood glucose measurements.  
6  
7  
8  
9

10  
11  
12 Five studies reported on bone health biomarkers, three of which compared inhaled  
13 corticosteroids and placebo; no pooled analyses were performed.<sup>29, 45, 58, 61, 92</sup> One RCT<sup>29</sup>  
14 compared inhaled budesonide (n=294) with placebo in episodic wheeze and found no effect on  
15 bone mineral density over three years. The RCT comparing high-dose inhaled fluticasone  
16 propionate with placebo (n=59 children with data) in viral wheeze<sup>45</sup> reported no statistically  
17 significant differences between groups in lumbar bone mineral density, bone mineral content or  
18 bone age at 12 months. A small RCT<sup>58</sup> comparing inhaled budesonide with placebo (n=20) in  
19 asthma found transient decreased levels of bone and collagen markers post-treatment and in a  
20 subset of children who received oral betamethasone, with no difference between groups. A study  
21 of patients with acute respiratory illness<sup>92</sup> compared hydrocortisone (n=28), methylprednisone  
22 (n=21) and controls (n=51) and found decreased levels of osteocalcin and alkaline phosphatase  
23 in younger children two days post-treatment; these effects were reversed 12 days after treatment.  
24  
25  
26 A non-randomized controlled trial (nRCT) of 36 asthma patients<sup>61</sup> compared IV  
27 methylprednisolone of three different durations and found that all had decreasing levels of serum  
28 osteocalcin that correlated with increasing duration of treatment.  
29  
30  
31  
32  
33  
34  
35  
36  
37  
38  
39  
40  
41  
42  
43  
44  
45  
46  
47  
48

### 49 *Cardiovascular System*

50  
51 No significant differences were found between *systemic corticosteroid and placebo* in three  
52 bronchiolitis studies reporting hypertension (estimated pOR 1).<sup>32, 40, 83</sup> Single studies with up to  
53  
54  
55  
56  
57



1  
2  
3 110 children did not report events for arrhythmia<sup>43</sup> and congestive heart failure<sup>47</sup> (*systemic or*  
4 *inhaled corticosteroid versus placebo*); and arrhythmia<sup>27</sup> or hypertension<sup>57</sup> (*dexamethasone with*  
5 *another corticosteroid*).  
6  
7  
8  
9

### 10 11 12 *General AEs/ Other Symptoms*

13  
14  
15 Meta-analyses included a total of two studies (range 197 to 869 children). There were no  
16  
17 statistically significant differences between: a) *systemic corticosteroid and placebo* for pallor;<sup>70,</sup>  
18  
19 <sup>83</sup> and b) *dexamethasone with another corticosteroid* for dizziness<sup>52</sup> or excessive urination.<sup>27</sup> No  
20  
21 study comparing *inhaled corticosteroid with placebo* reported general AEs.  
22  
23  
24  
25

### 26 *Immune System & Oncology*

27  
28 One study (95 participants)<sup>39</sup> compared *systemic corticosteroid and placebo* and found no  
29  
30 occurrences of immunosuppression. No other study reported immune system-related AEs.  
31  
32  
33  
34

## 35 **DISCUSSION**

36  
37 This systematic review of studies in which short-course corticosteroids were administered to  
38  
39 children under six years of age for acute respiratory conditions, included 85 studies involving  
40  
41 more than 11,000 patients. These studies used a variety of delivery routes, doses, formulations  
42  
43 and duration of corticosteroids. Overall, the evidence suggests that short-term corticosteroid use  
44  
45 is not associated with a significant increase in AEs across organ systems. However, given the  
46  
47 low quality of included studies, the heterogeneous and poor reporting of AEs, and the lack of  
48  
49 precision of results, considerable uncertainties remain regarding the safety of high-dose inhaled  
50  
51 or systemic corticosteroids for these indications in this age range.  
52  
53  
54  
55  
56  
57

1  
2  
3  
4  
5 A common concern when using corticosteroids in young children is effect on growth. Results  
6 from a single, small trial (n=129) of recurrent high-dose inhaled fluticasone propionate in  
7 wheezing preschoolers were heterogeneous across outcome measures, but suggested a small  
8 significant risk of growth suppression.<sup>45</sup> Observational data have also suggested that multiple  
9 corticosteroid bursts can increase the risk of growth suppression, fractures, bone mineral  
10 accretion and osteopenia in children with underlying respiratory disease.<sup>5, 6, 109</sup> Conversely, a  
11 pooled analysis using change-from-baseline linear growth did not find significant differences,  
12 albeit the other included study used a substantially lower equivalent dose of inhaled  
13 corticosteroid.<sup>110</sup> Further, results from individual studies reporting transient differences in bone  
14 and adrenal biomarkers are of unclear clinical relevance, particularly for previously healthy  
15 children and single use. This calls for caution and monitoring of linear growth, particularly when  
16 use of high-dose inhaled or systemic corticosteroid is recurrent.  
17  
18  
19  
20  
21  
22  
23  
24  
25  
26  
27  
28  
29  
30  
31  
32  
33  
34

35 We found no other statistically significant differences between systemic or inhaled corticosteroid  
36 and placebo, or between dexamethasone and other systemic corticosteroid, including subgroup  
37 analyses by respiratory condition or dose, for AEs across organ systems. Due to small sample  
38 sizes and low number of events, these results should be interpreted with caution. While we found  
39 increased pORs when comparing systemic corticosteroids for behavioural outcomes such as  
40 tremor/jitteriness and behaviour change, there were wide confidence intervals around estimates.  
41  
42 No study examined neurodevelopmental outcomes after corticosteroid administration; ideally,  
43 studies should assess children for potentially related long-term AEs using validated instruments  
44 in this domain. Results from case series and case reports added anecdotal evidence of rare cases  
45  
46  
47  
48  
49  
50  
51  
52  
53  
54  
55  
56  
57  
58  
59  
60

1  
2  
3 of hypersensitivity, infection or behavioral AEs, which have been described.<sup>111, 112</sup> While the  
4  
5 estimated increased pOR for rash and hives was close to statistical significance, no other  
6  
7 differences were found in systemic or severe infections as well as immunosuppression.  
8  
9

10  
11  
12 This review did not ascertain a clear safety advantage between systemic or inhaled  
13  
14 corticosteroids compared with placebo. When comparing between different systemic  
15  
16 corticosteroids, evidence favored oral dexamethasone over oral prednisone for vomiting (pOR  
17  
18 0.029; 95% CI 0.17 to 0.48;  $I^2=0\%$ ). Differences in palatability and tolerability between  
19  
20 corticosteroids are well known to parents, healthcare providers and researchers, and can  
21  
22 influence adherence to medication in children.<sup>113</sup> Further, different specific formulations of  
23  
24 corticosteroid (e.g., prednisolone tablets versus prednisolone syrup) have been shown to  
25  
26 influence taste and vomiting.<sup>25</sup> However, cost and access to better tolerated formulations may be  
27  
28 problematic. Subgroup analyses also found no significant differences between groups by  
29  
30 respiratory condition or dose (single versus multiple) for these outcomes. Due to extensive  
31  
32 variation in dosing within and across studies, we were unable to analyze data or draw further  
33  
34 conclusions with respect to dosage or differences between specific molecules. It should be noted  
35  
36 that among the eight RCTs<sup>35, 43, 46, 51, 65, 67, 71, 89</sup> directly comparing systemic and inhaled routes of  
37  
38 corticosteroid administration, none contributed meaningful data for meta-analysis. The decision  
39  
40 to initiate corticosteroid and the selection of drug, dose and mode of administration must  
41  
42 consider these uncertainties on harms, as well as existing evidence on comparative potency and  
43  
44 clinical effectiveness. The risk-benefit rationale is less established for repeated acute use in  
45  
46 younger children, such as in recurrent wheezing.<sup>114</sup>  
47  
48  
49  
50  
51  
52  
53  
54  
55  
56  
57  
58  
59  
60

### Strengths and limitations

We conducted a comprehensive systematic review of the literature following rigorous methods, including grey literature, to minimize potential for publication and selection bias. We examined safety outcomes across multiple acute respiratory conditions using 'baskets' of outcomes in each organ system to increase our ability to detect rare events and the precision of our estimates.<sup>16</sup>

This approach is reflective of clinical practice where corticosteroids are used across many respiratory diseases, even if the evidence base is not entirely robust for children. A recent systematic review also assessed the toxicity of short-course oral corticosteroids in children across clinical conditions.<sup>115</sup> However, there was scarce overlap in respiratory conditions across included studies, and authors mostly provided estimates of the incidence of AEs within treatment groups rather than comparative treatment effects. Studies in adults have also adopted similar approaches to estimate incidence rates of AEs. For example, findings from a recent retrospective cohort in adults showed a significant increase in rates of sepsis, venous thromboembolism and fracture.<sup>116</sup>

This review was limited by the quality of the primary literature, particularly regarding the definition, assessment and reporting of AEs. This underscores the challenges researchers encounter when attempting to synthesize safety data due to sparse and poor reporting,<sup>117</sup> and highlights the urgent need to enhance detection and reporting of AEs. For example, it is worthwhile noting that 26 studies reported 'no AEs' or 'no significant AE' which could not be included in pooled estimates; this may be a reflection of these studies being under-powered to detect statistically significant findings (especially for rare AEs) and/or AEs that may or may not be considered of special interest and/or clinically important. Such blanket statements are

1  
2  
3 problematic for interpretation, highlighting the need for study authors to clearly report AEs of  
4 interest pre- and post-study conduct. Common nomenclature (e.g., [www.meddra.org](http://www.meddra.org)) and  
5 standardized approaches to collection of AE data should be implemented to help draw  
6 comparisons across studies. Further, safety reporting was not a primary focus of the studies, AEs  
7 were rarely defined a priori, and methods for ascertaining AEs were usually absent. While the  
8 McHarm scale is recommended to be used in conjunction with other quality assessment tools to  
9 evaluate the broader elements of study quality, we used it exclusively to assess methodological  
10 quality since the primary focus of this review was on AEs. The AEs reported typically reflect  
11 what is detected by a healthcare provider; it is difficult to discern what is reported by patients as  
12 well as what patients consider important. The duration of surveillance of most studies was  
13 insufficient to detect many of the long-term AEs potentially associated with corticosteroid use.  
14 Although the present study suggests that single doses of systemic or inhaled corticosteroids may  
15 result in few AEs, recurrent courses may lead to long-term risks, as cumulative dosing has been  
16 shown to be a determinant of safety.<sup>109</sup> Finally, there was variation within and across studies  
17 with respect to maintenance corticosteroids, and concomitant and rescue medications. Due to the  
18 variation in corticosteroids and extensive range of AEs reported (including when a single study  
19 contributes to an outcome or in cases of zero events, where meta-analysis was not feasible or  
20 meaningful) amongst varied study designs of overall poor quality, we did not attempt to rate the  
21 quality of the body of the evidence using the Grading of Recommendations Assessment,  
22 Development and Evaluation (GRADE<sup>118</sup>) approach.  
23  
24  
25  
26  
27  
28  
29  
30  
31  
32  
33  
34  
35  
36  
37  
38  
39  
40  
41  
42  
43  
44  
45  
46  
47  
48  
49  
50

## 51 CONCLUSION

52  
53  
54  
55  
56  
57

1  
2  
3 This is the most comprehensive systematic review to date examining the safety of corticosteroids  
4 for managing acute respiratory conditions among young children, an age group of great clinical  
5 concern. While the existing evidence suggests that short-term high-dose inhaled or systemic  
6 corticosteroids is not associated with an increase in AEs across organ systems, uncertainties  
7 remain due to low quality of studies, poor reporting and lack of precision of results. Importantly,  
8 these results can help guide future research in the collection and reporting of AEs, particularly  
9 concerning measures of growth and behavioral outcomes; this in turn is needed to help inform  
10 shared decision-making between clinicians and parents/caregivers of young children.  
11  
12  
13  
14  
15  
16  
17  
18  
19  
20  
21  
22  
23  
24  
25  
26  
27  
28  
29  
30  
31  
32  
33  
34  
35  
36  
37  
38  
39  
40  
41  
42  
43  
44  
45  
46  
47  
48  
49  
50  
51  
52  
53  
54  
55  
56  
57  
58  
59  
60

## Tables

Table 1. Summary of methodological quality assessments

Table 2. Number of studies and participants reporting adverse events

## Figures

Figure 1. PRISMA study flow selection

Figure 2. Forest plot of adverse events – systemic versus placebo

Figure 3. Forest plot of adverse events – inhaled versus placebo

Figure 4. Forest plot of adverse events – dexamethasone versus other

## Supplementary data

Supplement 1 - Search strategy

Supplement 2 - Eligibility criteria for study inclusion

Supplement 3 - Characteristics of included studies

- a. Summary characteristics of included studies
- b. Summary characteristics of included studies – comparisons
- c. Characteristics of included studies

Supplement 4 - Methodological quality assessments of included studies

Supplement 5 - Effect estimates for all adverse events with subgroups

- a. Infection & respiratory system
- b. Gastro-intestinal tract
- c. CNS & behaviour effects
- d. Dermatologic conditions
- e. Endocrine/ metabolic & musculoskeletal system
- f. Cardiovascular system
- g. General adverse events/ other symptoms
- h. Immune system & oncology

Supplement 6 - Forest plots of adverse events

Systemic vs. placebo

- a. Infection & respiratory system
- b. Gastro-intestinal tract
- c. CNS & behaviour effects
- d. Dermatologic conditions
- e. Endocrine/ metabolic & musculoskeletal system
- f. Cardiovascular system
- g. General adverse events/ other symptoms
- h. Immune system & oncology

Inhaled vs. placebo

- a. Infection & respiratory system
- b. Gastro-intestinal tract

- c. CNS & behaviour effects
  - d. Dermatologic conditions
  - e. Endocrine/ metabolic & musculoskeletal system
  - f. Cardiovascular system
- Dexamethasone vs. Other steroid
- a. Gastro-intestinal tract
  - b. CNS & behaviour effects
  - c. Dermatologic conditions
  - d. Endocrine/ metabolic & musculoskeletal system
  - e. Cardiovascular system
  - f. General adverse events/ other symptoms

#### Supplement 7 - Studies reporting no adverse events

**Acknowledgments:** We gratefully acknowledge the following individuals for their contributions: Megan Nuspl, Sanjaya Dhakal and Pritam Chordiya for assisting with screening, initial data extraction and verification, and article retrieval; Marc Parsons for assisting with data extraction and verification, and quality assessment; and, Jack Yeung, Marta Oleszczuk and Igor Pravdivyi for assistance with translations. MN, SD, PC and MP received remuneration for their work from a Canadian Institutes of Health Research (CIHR) grant (funding reference number KRS134306). JY, MO and IP did not receive remuneration for the translation work. None of the acknowledged individuals have industry affiliations, or any conflicts of interest to declare.

**Contributors:** RMF, AW, BV, SA, ACP, ASS, BHR, DWJ, DA, TPK, and LH critically reviewed and contributed to drafts of the report. RF conducted the literature searches. AW conducted screening, quality assessments, and data extraction. AW and BV conducted data synthesis/analysis. RMF, AW, BV, SA, ACP, ASS, BHR, DWJ, DA, TPK, and LH contributed to interpretation of results. All of the authors approved the final version of this report.

**Funding:** This study was funded by a Knowledge Synthesis Grant from CIHR (funding reference number KRS134306). The funder had no role in the design of the study, the collection, analysis or interpretation of data, the writing of the report, or the decision to submit the paper for publication.

**Competing interests:** All authors declare funding from CIHR for the submitted work. LH was funded in part by a New Investigator Salary Award from the CIHR; ASP is supported by a Tier II University of Ottawa Research Chair Award; BHR was supported by a Tier I Canada Research Chair in Evidence-based Emergency Medicine from CIHR. The remaining authors have no financial relationships relevant to this manuscript to disclose. DWJ, TPK and ASP are also authors on some of the included studies. The other authors have no conflicts of interest to declare.



1  
2  
3  
4 **Provenance and peer review:** Not commissioned; externally peer-reviewed.  
5  
6

7 **Data sharing statement:** Dr. Hartling had full access to all of the data in the study and takes  
8 responsibility for the integrity of the data and the accuracy of the data analysis. Data for this  
9 systematic review (using published data) are available from the corresponding author upon  
10 reasonable request.  
11  
12  
13  
14  
15  
16  
17  
18  
19  
20  
21  
22  
23  
24  
25  
26  
27  
28  
29  
30  
31  
32  
33  
34  
35  
36  
37  
38  
39  
40  
41  
42  
43  
44  
45  
46  
47  
48  
49  
50  
51  
52  
53  
54  
55  
56  
57  
58  
59  
60

For peer review only

**REFERENCES**

1. de Benedictis FM, Bush A. Corticosteroids in respiratory diseases in children. *Am J Respir Crit Care Med* 2012;185(1):12-23.
2. Johnson D. Croup. *BMJ Clin Evid* 2009.
3. Russell KF, Liang Y, O'Gorman K, et al. Glucocorticoids for croup. *Cochrane Database Syst Rev* 2011;1(CD001955).
4. Adams NP, Bestall JC, Jones P, et al. Fluticasone at different doses for chronic asthma in adults and children. *Cochrane Database Syst Rev* 2008;4(CD003534).
5. Kelly HW, Sternberg AL, Lescher R, et al. Effect of inhaled glucocorticoids in childhood on adult height. *N Engl J Med* 2012;367(10):904-912.
6. van Staa T, Cooper C, Leufkens H, et al. Children and the risk of fractures caused by oral corticosteroids. *J Bone Miner Res* 2003;18(5):913-918.
7. Castro-Rodriguez JA, Rodrigo GJ. Efficacy of inhaled corticosteroids in infants and preschoolers with recurrent wheezing and asthma: A systematic review with meta-analysis. *Pediatrics* 2009;123(3):e519-525.
8. Zhang L, Axelsson I, Chung M, et al. Dose response of inhaled corticosteroids in children with persistent asthma: A systematic review. *Pediatrics* 2011;127(1):129-138.
9. Loke YK, Price D, Herxheimer A. Systematic reviews of adverse effects: Framework for a structured approach. *BMC Med Res Methodol* 2007;7(1):1-9.
10. Singh JA, Wells GA, Christensen R, et al. Adverse effects of biologics: A network meta-analysis and cochrane overview. *Cochrane Database Syst Rev* 2011;2(CD008794).
11. Higgins J, Green S. (editors). The Cochrane Handbook for Systematic Reviews of Interventions Version 5.1.0. [updated March 2011]. The Cochrane Collaboration, 2011. [www.cochrane-handbook.org](http://www.cochrane-handbook.org) (accessed 12 January 2018).
12. Moher D, Liberati A, Tetzlaff J, et al. Preferred reporting items for systematic reviews and meta-analyses: The PRISMA statement. *J Clin Epidemiol* 2009;62(10):1006-1012.

13. Zorzela L, Loke YK, Ioannidis JP, et al. PRISMA harms checklist: Improving harms reporting in systematic reviews. *BMJ* 2016;352:i157.
14. Global Initiative for Asthma. Global strategy for asthma management and prevention. <http://www.ginasthma.org> (accessed 12 January 2018).
15. Nebeker JR, Barach P, Samore MH. Clarifying adverse drug events: A clinician's guide to terminology, documentation, and reporting. *Ann Intern Med* 2004;140(10):795-801.
16. Tugwell P, Judd MG, Fries JF, et al. Powering our way to the elusive side effect: A composite outcome 'basket' of predefined designated endpoints in each organ system should be included in all controlled trials. *J Clin Epidemiol* 2005;58(8):785-790.
17. Chou R, Aronson N, Atkins DL, et al. Assessing harms when comparing medication interventions. In: Agency for Healthcare Research and Quality (US). *Methods guide for effectiveness and comparative effectiveness reviews*. Rockville, MD; 2008.
18. Bradburn MJ, Deeks JJ, Berlin JA, Russell Localio A. Much ado about nothing: a comparison of the performance of meta-analytical methods with rare events. *Stat Med* 2007;26(1):53-77.
19. Hedges LV. Comment on 'Misunderstandings about Q and "Cochran's Q Test" in meta analysis'. *Stat Med* 2016;35(4):496-497.
20. Egger M, Davey Smith G, Schneider M, et al. Bias in meta-analysis detected by a simple, graphical test. *BMJ* 1997;315(7109):629-634.
21. Review Manager (RevMan) [computer program]. Version 5.3. Copenhagen: The Nordic Cochrane Centre, The Cochrane Collaboration, 2014.
22. TS Inc. TIBCO Spotfire S+ Workbench, Version 3.4 [statistical software]. 1996.
23. Alangari AA, Malhis N, Mubasher M, et al. Budesonide nebulization added to systemic prednisolone in the treatment of acute asthma in children: A double-blind, randomized, controlled trial. *Chest* 2014;145(4):772-778.
24. Alansari KS, Sakran M, Davidson BL, et al. Oral dexamethasone for bronchiolitis: A randomized trial. *Pediatrics* 2013;132(4):e810-816.

- 1  
2  
3 25. Aljebab F, Alanazi M, Choonara I, et al. Observational study on the palatability and  
4 tolerability of oral prednisolone and oral dexamethasone in children in Saudi Arabia and  
5 the UK. *Arch Dis Child* 2017;103(1):83-88.  
6  
7  
8 26. Alshehr M, Almegamsi T, Hammdi A. Efficacy of a small dose of oral dexamethasone in  
9 croup. *Biomed Res* 2005;16(1):65-72.  
10  
11  
12 27. Altamimi S, Robertson G, Jastaniah, W, et al. Single-dose oral dexamethasone in the  
13 emergency management of children with exacerbations of mild to moderate asthma.  
14 *Pediatr Emerg Care* 2006;22(12):786-793.  
15  
16  
17 28. Bacharier LB, Phillips BR, Zeiger RS, et al; Childhood Asthma Research and Education  
18 Network. Episodic use of an inhaled corticosteroid or leukotriene receptor antagonist in  
19 preschool children with moderate-to-severe intermittent wheezing. *J Allergy Clin*  
20 *Immunol* 2008;122(6):1127-1135.e8.  
21  
22  
23 29. Bisgaard H, Hermansen MN, Loland L, et al. Intermittent inhaled corticosteroids in infants  
24 with episodic wheezing. *N Engl J Med* 2006;354(19):1998-2005.  
25  
26  
27 30. Bjornson CL, Klassen, TP, Williamson J, et al; Pediatric Emergency Research Canada  
28 Network. A randomized trial of a single dose of oral dexamethasone for mild croup. *N*  
29 *Engl J Med* 2004;351(13):1306-1313.  
30  
31  
32 31. Brunette MG, Lands L, Thibodeau LP. Childhood asthma: Prevention of attacks with short-  
33 term corticosteroid treatment of upper respiratory tract infection. *Pediatrics*  
34 1988;81(5):624-629.  
35  
36  
37 32. Buckingham SC, Jafri HS, Bush AJ, et al. A randomized, double-blind, placebo-controlled  
38 trial of dexamethasone in severe respiratory syncytial virus (RSV) infection: Effects on  
39 RSV quantity and clinical outcome. *J Infect Dis* 2002;185(9):1222-1228.  
40  
41  
42 33. Bülow SM, Nir M, Levin E, et al. Prednisolone treatment of respiratory syncytial virus  
43 infection: A randomized controlled trial of 147 infants. *Pediatrics* 1999;104(6):e77.  
44  
45  
46 34. Chang AB, Clark R, Sloots TP, et al. A 5- versus 3-day course of oral corticosteroids for  
47 children with asthma exacerbations who are not hospitalised: A randomised controlled  
48 trial. *Med J Aust* 2008;189(6):306-310.  
49  
50  
51  
52  
53  
54  
55  
56  
57  
58  
59  
60

- 1  
2  
3 35. Chen ZG, Li M, Chen H, et al. Efficacy of pulmicort suspension plus salbutamol and  
4 ipratropium bromide for management of acute asthma exacerbation in children: A  
5 comparative study. *J South Med Univ* 2008;28(3):470-472.  
6  
7  
8 36. Chub-Uppakarn S, Sangsupawanich P. A randomized comparison of dexamethasone 0.15  
9 mg/kg versus 0.6 mg/kg for the treatment of moderate to severe croup. *Int J Pediatr*  
10 *Otorhinolaryngol* 2007;71(3):473-477.  
11  
12  
13 37. Clavenna A, Sequi M, Cartabia M, et al. Effectiveness of nebulized beclomethasone in  
14 preventing viral wheezing: An RCT. *Pediatrics* 2014;133(3):e505-512.  
15  
16  
17 38. Connett GJ, Warde C, Wooler E, et al. Prednisolone and salbutamol in the hospital treatment  
18 of acute asthma. *Arch Dis Child* 1994;70(3):170-173.  
19  
20  
21 39. Connolly JH, Field CMB, Glasgow JFT, et al. A double blind trial of prednisolone in  
22 epidemic bronchiolitis due to respiratory syncytial virus. *Acta Paediatr Scand*  
23 1969;58(2):116-120.  
24  
25  
26 40. Corneli HM, Zorc JJ, Mahajan P, et al; Bronchiolitis Study Group of the Pediatric  
27 Emergency Care Applied Research Network. A multicenter, randomized, controlled trial  
28 of dexamethasone for bronchiolitis. *N Engl J Med* 2007;357(4):331-339.  
29  
30  
31 41. Cronin JJ, McCoy S, Kennedy U, et al. A randomized trial of single-dose oral  
32 dexamethasone versus multidose prednisolone for acute exacerbations of asthma in  
33 children who attend the emergency department. *Ann Emerg Med* 2016;67(5):593-601.  
34  
35  
36 42. Csonka P, Kaila M, Laippala P, et al. Oral prednisolone in the acute management of children  
37 age 6 to 35 months with viral respiratory infection-induced lower airway disease: A  
38 randomized, placebo-controlled trial. *J Pediatr* 2003;143(6):725-730.  
39  
40  
41 43. Daugbjerg P, Brenøe E, Forchhammer H, et al. A comparison between nebulized terbutaline,  
42 nebulized corticosteroid and systemic corticosteroid for acute wheezing in children up to  
43 18 months of age. *Acta Paediatr* 1993;82(6-7):547-551.  
44  
45  
46 44. Dawson KP, Sharpe C. A comparison of the acceptability of prednisolone tablets and  
47 prednisolone sodium phosphate solution in childhood acute asthma. *Aust J Hosp Pharm*  
48 1993;23(5):320-323.  
49  
50  
51 45. Ducharme FM, Lemire C, Noya FJD, et al. Preemptive use of high-dose fluticasone for virus-  
52 induced wheezing in young children. *N Engl J Med* 2009;360(4):339-353.  
53  
54  
55  
56  
57  
58  
59  
60

- 1  
2  
3  
4  
5 46. Eboriadou M, Chryssanthopoulou D, Stamoulis P, et al. The effectiveness of local  
6 corticosteroids therapy in the management of mild to moderate viral croup. *Minerva*  
7 *Pediatr* 2010;62(1):23-28.  
8
- 9  
10 47. Eden AN, Kaufman A, Yu R. Corticosteroids and croup. Controlled double-blind study.  
11 *JAMA* 1967;200(5):403-404.  
12
- 13  
14 48. Escobedo Chavez E, Garcia Muniz LO, Thompson Chagoyan O, et al. Steroids and  
15 inhalation therapy in the management of acute asthma in children. *Curr Ther Res Clin*  
16 *Exp* 1992;52(1):7-12.  
17
- 18  
19 49. Fifoot AA, Ting JYS. Comparison between single-dose oral prednisolone and oral  
20 dexamethasone in the treatment of croup: A randomized, double-blinded clinical trial.  
21 *Emerg Med Australas* 2007;19(1):51-58.  
22
- 23  
24 50. Fitzgerald D, Mellis C, Johnson M, et al. Nebulized budesonide is as effective as nebulized  
25 adrenaline in moderately severe croup. *Pediatrics* 1996;97(5):722-725.  
26
- 27  
28 51. Francis P, Geelhoed G, Harris MA, et al. Effect of nebulised fluticasone propionate 1 mg  
29 twice daily compared with oral prednisolone in pre-school children aged 48 months or  
30 less with an acute exacerbation of asthma [abstract]. *Eur Respir J* 1997(Suppl 25):275s.  
31
- 32  
33 52. Garbutt JMC, Bridget C, Sterkel R, et al. The comparative effectiveness of prednisolone and  
34 dexamethasone for children with croup: A community-based randomized trial. *Clin*  
35 *Pediatr (Phila)* 2013;52(11):1014-1021.  
36
- 37  
38 53. Ghirga G, Ghirga P, Fagioli S, et al. Intermittent treatment with high dose nebulized  
39 beclomethasone for recurrent wheezing in infants due to upper respiratory tract infection.  
40 *Minerva Pediatr* 2002;54(3):217-220.  
41
- 42  
43 54. Gill N, Sirizzotti N, Johnson D, et al. Endogenous glucocorticoid response to single-dose  
44 dexamethasone for croup in children: A pharmacodynamic study. *Pediatr Emerg Care*  
45 2017;11.  
46
- 47  
48 55. Goebel J, Estrada B, Quinonez J, et al. Prednisolone plus albuterol versus albuterol alone in  
49 mild to moderate bronchiolitis. *Clin Pediatr (Phila)* 2000;39(4):213-220.  
50
- 51  
52 56. Grant CC, Duggan AK, Santosham M, et al. Oral prednisone as a risk factor for infections in  
53 children with asthma. *Arch Pediatr Adolesc Med* 1996;150(1):58-63.  
54  
55  
56  
57

- 1  
2  
3  
4  
5 57. Gries DM, Moffitt DR, Pulos E, et al. A single dose of intramuscularly administered  
6 dexamethasone acetate is as effective as oral prednisone to treat asthma exacerbations in  
7 young children. *J Pediatr* 2000;136(3):298-303.  
8  
9  
10 58. Hedlin G, Svedmyr J, Ryden AC. Systemic effects of a short course of betamethasone  
11 compared with high-dose inhaled budesonide in early childhood asthma. *Acta Paediatr*  
12 1999;88(1):48-51.  
13  
14  
15 59. Husby S, Agertoft L, Mortensen S, et al. Treatment of croup with nebulised steroid  
16 (budesonide): A double blind, placebo controlled study. *Arch Dis Child* 1993;68(3):352-  
17 325.  
18  
19  
20 60. Inglis AF. Herpes simplex virus infection. A rare cause of prolonged croup. *Arch*  
21 *Otolaryngol Head Neck Surg* 1993;119(5):551-552.  
22  
23  
24 61. Jan JS, Wu WF. Acute effect of glucocorticoid treatment on serum osteocalcin levels in  
25 asthmatic children. *J Microbiol Immunol Infect* 2000;33(1):25-28.  
26  
27  
28 62. Jartti T, Nieminen R, Vuorinen T, et al. Short- and long-term efficacy of prednisolone for  
29 first acute rhinovirus-induced wheezing episode. *J Allergy Clin Immunol*  
30 2015;135(3):691-698.  
31  
32  
33 63. Jartti T, Lehtinen Pasi, Timo V, et al. Evaluation of the efficacy of prednisolone in early  
34 wheezing induced by rhinovirus or respiratory syncytial virus. *Pediatr Infect Dis J*  
35 2006;25(6):482-488.  
36  
37  
38 64. Jartti T, Lehtinen P, Vanto T, et al. Efficacy of prednisolone in children hospitalized for  
39 recurrent wheezing. *Pediatr Allergy Immunol* 2007;18(4):326-334.  
40  
41  
42 65. Johnson DW, Jacobson S, Edney PC, et al. A comparison of nebulized budesonide,  
43 intramuscular dexamethasone, and placebo for moderately severe croup. *N Engl J Med*  
44 1998;339(8):498-503.  
45  
46  
47 66. Johnson DW, Schuh S, Koren G, et al. Outpatient treatment of croup with nebulized  
48 dexamethasone. *Arch Pediatr Adolesc Med* 1996;150(4):349-355.  
49  
50  
51 67. Klassen TP, Craig WR, Moher D, et al. Nebulized budesonide and oral dexamethasone for  
52 treatment of croup: A randomized controlled trial. *JAMA* 1998;279(20):1629-1632.  
53  
54  
55  
56  
57  
58  
59  
60

- 1  
2  
3 68. Klassen TP, Feldman ME, Watters LK, et al. Nebulized budesonide for children with mild-  
4 to-moderate croup. *N Engl J Med* 1994;331(5):285-289.  
5  
6  
7 69. Klassen TP, Watters LK, Feldman ME, et al. The efficacy of nebulized budesonide in  
8 dexamethasone-treated outpatients with croup. *Pediatrics* 1996;97(4):463-466.  
9  
10  
11 70. Kuyucu S, Unal S, Kuyucu N, et al. Additive effects of dexamethasone in nebulized  
12 salbutamol or L-epinephrine treated infants with acute bronchiolitis. *Pediatr Int*  
13 2004;46(5):539-544.  
14  
15  
16 71. Lai ST, Hua YM, Lai YS, et al. Comparison of nebulized budesonide with intravenous  
17 dexamethasone in the treatment of young children hospitalized with acute asthma. *J Med*  
18 *Sci* 2005;25(5):223-228.  
19  
20  
21 72. Langton Hewer S, Hobbs J, Reid F, et al. Prednisolone in acute childhood asthma: Clinical  
22 responses to three dosages. *Respir Med* 1998;92(3):541-546.  
23  
24  
25 73. Lee KM, Lin YZ, Huang FY. Steroid-induced acute psychosis in a child with asthma: Report  
26 of one case. *Acta Paediatr Taiwan* 2001;42(3):169-171.  
27  
28  
29 74. Leer JA, Green JL, Heimlich EM, et al. A controlled, collaborative study in 297 infants and  
30 children. *Am J Dis Child* 1969;117(5):495-503.  
31  
32  
33 75. Lehmann S, Ott H. Glucocorticoid hypersensitivity as a rare but potentially fatal side effect  
34 of paediatric asthma treatment: A case report. *J Med Case Rep* 2008;2:186.  
35  
36  
37 76. Leipzig B, Oski FA, Cummings CW, et al. A prospective randomized study to determine the  
38 efficacy of steroids in treatment of croup. *J Pediatr* 1979;94(2):194-196.  
39  
40  
41 77. Lin YZ, Hsieh KH, Chen W, et al. Clinical trial of corticosteroid and beta-2 bronchodilator in  
42 acute wheezing infants. *Acta Paed Sin* 1991;32(6):333-340.  
43  
44  
45 78. Lucas-Bouwman ME, Roorda RJ, Jansman FGA, et al. Crushed prednisolone tablets or oral  
46 solution for acute asthma? *Arch Dis Child* 2001;84(4):347-348.  
47  
48  
49 79. Nahum A, Garty BZ, Marcus N, et al. Severe hypersensitivity reactions to corticosteroids in  
50 children. *Pediatr Emerg Care* 2009;25(5):339-341.  
51  
52  
53 80. Paniagua N, Munoz N, Lopez R, et al. Randomized trial of two doses of oral dexamethasone  
54 versus prednisone/prednisolone for children with acute asthma exacerbations in pediatric  
55  
56  
57  
58  
59  
60



- 1  
2  
3 emergency department. *Eur J Pediatr* Conference: 6th Congress of the European  
4 Academy of Paediatric Societies Switzerland 2016;175(11):1480.  
5  
6  
7 81. Panickar J, Lakhanpaul M, Lambert PC, et al. Oral prednisolone for preschool children with  
8 acute virus-induced wheezing. *N Engl J Med* 2009;360(4):329-338.  
9  
10  
11 82. Panigada S, Sacco O, Girosi D, et al. Corticosteroids may favor proliferation of thoracic  
12 inflammatory myofibroblastic tumors. *Pediatr Pulmonol* 2014;49(3):E109-E111.  
13  
14  
15 83. Plint AC, Johnson DW, Patel H, et al; Pediatric Emergency Research Canada. Epinephrine  
16 and dexamethasone in children with bronchiolitis. *N Engl J Med* 2009;360(20):2079-  
17 2089.  
18  
19  
20 84. Razi CH, Akelma AZ, Harmanci K, et al. The addition of inhaled budesonide to standard  
21 therapy shortens the length of stay in hospital for asthmatic preschool children: A  
22 randomized, double-blind, placebo-controlled trial. *Int Arch Allergy Immunol*  
23 2015;166(4):297-303.  
24  
25  
26  
27 85. Roberts GW, Master VV, Staugas RE, et al. Repeated dose inhaled budesonide versus  
28 placebo in the treatment of croup. *J Paediatr Child Health* 1999;35(2):170-174.  
29  
30  
31 86. Roorda RJ, Walhof CM. Effects of inhaled fluticasone propionate administered with metered  
32 dose inhaler and spacer in mild to moderate croup: A negative preliminary report. *Pediatr*  
33 *Pulmonol* 1998;25(2):114-117.  
34  
35  
36 87. Roosevelt G, Sheehan K, Grupp-Phelan J, et al. Dexamethasone in bronchiolitis: A  
37 randomised controlled trial. *Lancet* 1996;348(9023):292-295.  
38  
39  
40 88. Sadowitz PD, Page NE, Crowley K. Adverse effects of steroid therapy in children with  
41 pharyngitis with unsuspected malignancy. *Pediatr Emerg Care* 2012;28(8):807-809.  
42  
43  
44 89. Saito M, Kikuchi Y, Kawarai Lefor A, et al. High-dose nebulized budesonide is effective for  
45 mild asthma exacerbations in children under 3 years of age. *Eur Ann Allergy Clin*  
46 *Immunol* 2017;49(1):22-27.  
47  
48  
49 90. Schuh S, Coates AL, Dick P, et al. A single versus multiple doses of dexamethasone in  
50 infants wheezing for the first time. *Pediatr Pulmonol* 2008;43(9):844-850.  
51  
52  
53  
54  
55  
56  
57  
58  
59  
60

- 1  
2  
3 91. Schuh S, Willan AR, Stephens D, et al. Can montelukast shorten prednisolone therapy in  
4 children with mild to moderate acute asthma? A randomized controlled trial. *J Pediatr*  
5 2009;155(6):795-800.  
6  
7  
8 92. Siomou E, Challa A, Tzoufi M, et al. Biochemical markers of bone metabolism in infants and  
9 children under intravenous corticosteroid therapy. *Calcif Tissue Int* 2003;73(4):319-325.  
10  
11 93. Sparrow A, Geelhoed G. Prednisolone versus dexamethasone in croup: A randomised  
12 equivalence trial. *Arch Dis Child* 2006;91(7):580-583.  
13  
14 94. Stafford L, Hope ME, Janney EP, et al. Comparison of paediatric steroid mixtures.  
15 *Australian Journal of Hospital Pharmacy* 1998;28(4):246-249.  
16  
17 95. Storr J, Barry BE, Barrell E, et al. Effect of a single oral dose of prednisolone in acute  
18 childhood asthma. *Lancet* 1987;1(8538):879-882.  
19  
20 96. Sumboonnanonda A, Suwanjutha S, Sirinavin S. Randomized controlled trial of  
21 dexamethasone in infectious croup. *J Med Assoc Thai* 1997;80(4):262-265.  
22  
23 97. Sung L, Osmond MH, Klassen TP. Randomized, controlled trial of inhaled budesonide as an  
24 adjunct to oral prednisone in acute asthma. *Acad Emerg Med* 1998;5(3):209-213.  
25  
26 98. Super DM, Cartelli NA, Brooks LJ, et al. A prospective randomized double-blind study to  
27 evaluate the effect of dexamethasone in acute laryngotracheitis. *J Pediatr*  
28 1989;115(2):323-329.  
29  
30 99. Sussman S, Grossman M, Magoffin R, et al. Dexamethasone (16 alpha methyl, 9 alpha  
31 fluoroprednisolone) in obstructive respiratory tract infections in children. *Pediatrics*  
32 1964;34(6):851-855.  
33  
34 100. Svedmyr J, Nyberg E, Åsbrink-Nilsson E, et al. Intermittent treatment with inhaled steroids  
35 for deterioration of asthma due to upper respiratory tract infections. *Acta Paediatr*  
36 1995;84(8):884-888.  
37  
38 101. Svedmyr J, Nyberg E, Thunqvist P, et al. Prophylactic intermittent treatment with inhaled  
39 corticosteroids of asthma exacerbations due to airway infections in toddlers. *Acta*  
40 *Paediatr* 1999;88(1):42-47.  
41  
42  
43  
44  
45  
46  
47  
48  
49  
50  
51  
52  
53  
54  
55  
56  
57  
58  
59  
60

- 1  
2  
3 102. Tagarro A, Pérez L, Quintero VM, et al. Dexamethasone does not reduce length of  
4 hospitalization or recurrent wheezing 1 year after early bronchiolitis. *Minerva Pediatr*  
5 2014;66(2):131-140.  
6  
7  
8 103. Tal A, Bavailski C, Yohai D, et al. Dexamethasone and salbutamol in the treatment of acute  
9 wheezing in infants. *Pediatrics* 1983;71(1):13-18.  
10  
11  
12 104. Tamura A, Matsubara K, Tanaka T, et al. Methylprednisolone pulse therapy for refractory  
13 mycoplasma pneumoniae pneumonia in children. *J Infect* 2008;57(3):223-228.  
14  
15  
16 105. Teeratakulpisarn J, Limwattananon C, Tanupattarachai S, et al. Efficacy of dexamethasone  
17 injection for acute bronchiolitis in hospitalized children: A randomized, double-blind,  
18 placebo-controlled trial. *Pediatr Pulmonol* 2007;42(5):433-439.  
19  
20  
21 106. van Woensel JBM, Wolfs TFW, van Aalderen WMC, et al. Randomised double blind  
22 placebo controlled trial of prednisolone in children admitted to hospital with respiratory  
23 syncytial virus bronchiolitis. *Thorax* 1997;52(7):634-637.  
24  
25  
26 107. Webb MSC, Henry RL, Milner AD. Oral corticosteroids for wheezing attacks under 18  
27 months. *Arch Dis Child* 1986;61(1):15-19.  
28  
29  
30 108. Zhang L, Ferruzzi E, Bonfanti T, et al. Long and short-term effect of prednisolone in  
31 hospitalized infants with acute bronchiolitis. *J Paediatr Child Health* 2003;39(7):548-  
32 551.  
33  
34  
35 109. Kelly HW, Van Natta ML, Covar RA, et al. Effect of long-term corticosteroid use on bone  
36 mineral density in children: A prospective longitudinal assessment in the childhood  
37 asthma management program (CAMP) study. *Pediatrics* 2008;122(1):e53-e61.  
38  
39  
40 110. Fuhlbrigge AL, Kelly HW. Inhaled corticosteroids in children: Effects on bone mineral  
41 density and growth. *Lancet Respir Med* 2014;2(6):487-496.  
42  
43  
44 111. Aljebab F, Choonara I, Conroy S. Systematic review of the toxicity of long-course oral  
45 corticosteroids in children. *PLoS ONE* 2017;12(1):e0170259.  
46  
47  
48 112. Vatti RR, Ali F, Teuber S, et al. Hypersensitivity reactions to corticosteroids. *Clinic Rev*  
49 *Allerg Immunol* 2014;47(1):26-37.  
50  
51  
52 113. Rieder M. Size and taste matters: Recent progress in the development of age-appropriate  
53 medicines for children. *Pharm Med* 2018;32(1):21-30.  
54  
55  
56  
57  
58  
59  
60

- 1  
2  
3  
4  
5 114. Beigelman A, Durrani S, Guilbert TW. Should a preschool child with acute episodic wheeze  
6 be treated with oral corticosteroids? A pro/con debate. *J Allergy Clin Immunol Pract*  
7 2016;4(1):27-35.  
8  
9  
10 115. Aljebab F, Choonara I, Conroy S. Systematic review of the toxicity of short-course oral  
11 corticosteroids in children. *Arch Dis Child* 2016;101(4):365-370.  
12  
13  
14 116. Waljee AK, Rogers MA, Lin P, et al. Short term use of oral corticosteroids and related  
15 harms among adults in the united states: Population based cohort study. *BMJ*  
16 2017;357:j1415.  
17  
18  
19 117. Hartling L, Ali S, Dryden DM, et al. How safe are common analgesics for the treatment of  
20 acute pain for children? A systematic review. *Pain Res Manag* 2016;5346819.  
21  
22  
23 118. Guyatt GH, Oxman AD, Vist GE, et al. GRADE: an emerging consensus on rating quality  
24 of evidence and strength of recommendations. *BMJ* 2008; 336(7650):924-926.  
25  
26  
27  
28  
29  
30  
31  
32  
33  
34  
35  
36  
37  
38  
39  
40  
41  
42  
43  
44  
45  
46  
47  
48  
49  
50  
51  
52  
53  
54  
55  
56  
57  
58  
59  
60

**Table 1. Summary of methodological quality assessments**

| McHarm* criteria                                                                                                | Rating | No. of studies (% <sup>2</sup> ) |
|-----------------------------------------------------------------------------------------------------------------|--------|----------------------------------|
| 1) Were the harms PRE-DEFINED using standardized or precise definitions?                                        | Yes    | 6 (7)                            |
|                                                                                                                 | No     | 79 (93)                          |
|                                                                                                                 | Unsure | 0                                |
| 2) Were SERIOUS events precisely defined?                                                                       | Yes    | 2 (2)                            |
|                                                                                                                 | No     | 83 (98)                          |
|                                                                                                                 | Unsure | 0                                |
| 3) Were SEVERE events precisely defined?                                                                        | Yes    | 0                                |
|                                                                                                                 | No     | 85 (100)                         |
|                                                                                                                 | Unsure | 0                                |
| 4) Were the number of DEATHS in each study group specified OR were the reason(s) for not specifying them given? | Yes    | 10 (12)                          |
|                                                                                                                 | No     | 75 (88)                          |
|                                                                                                                 | Unsure | 0                                |
| 5) Was the mode of harms collection specified as ACTIVE?                                                        | Yes    | 46 (54)                          |
|                                                                                                                 | No     | 37 (44)                          |
|                                                                                                                 | Unsure | 2 (2)                            |
| 6) Was the mode of harms collection specified as PASSIVE?                                                       | Yes    | 11 (13)                          |
|                                                                                                                 | No     | 73 (86)                          |
|                                                                                                                 | Unsure | 1 (1)                            |
| 7) Did the study specify WHO collected the harms?                                                               | Yes    | 22 (26)                          |
|                                                                                                                 | No     | 63 (74)                          |
|                                                                                                                 | Unsure | 0                                |
| 8) Did the study specify the TRAINING or BACKGROUND of who ascertained the harms?                               | Yes    | 20 (24)                          |
|                                                                                                                 | No     | 65 (76)                          |
|                                                                                                                 | Unsure | 0                                |
| 9) Did the study specify the TIMING and FREQUENCY of collection of the harms?                                   | Yes    | 39 (46)                          |
|                                                                                                                 | No     | 45 (53)                          |
|                                                                                                                 | Unsure | 1 (1)                            |
| 10) Did the author(s) use STANDARD scale(s) or checklist(s) for harms collection?                               | Yes    | 6 (7)                            |
|                                                                                                                 | No     | 76 (89)                          |
|                                                                                                                 | Unsure | 3 (4)                            |
| 11) Did the authors specify if the harms reported encompass ALL the events collected or a selected SAMPLE?      | Yes    | 80 (94)                          |
|                                                                                                                 | No     | 2 (2)                            |
|                                                                                                                 | Unsure | 3 (4)                            |
| 12) Was the NUMBER of participants that withdrew or were lost to follow-up specified for each study group?      | Yes    | 24 (28)                          |
|                                                                                                                 | No     | 61 (72)                          |
|                                                                                                                 | Unsure | 0                                |
| 13) Was the TOTAL NUMBER of participants affected by harms specified for each study arm?                        | Yes    | 16 (19)                          |
|                                                                                                                 | No     | 69 (81)                          |
|                                                                                                                 | Unsure | 0                                |
| 14) Did the author(s) specify the NUMBER for each TYPE of harmful event for each study group?                   | Yes    | 43 (51)                          |
|                                                                                                                 | No     | 39 (46)                          |
|                                                                                                                 | Unsure | 3 (4)                            |
| 15) Did the author(s) specify the type of analyses undertaken for harms data?                                   | Yes    | 10 (12)                          |
|                                                                                                                 | No     | 75 (88)                          |
|                                                                                                                 | Unsure | 0                                |

\*methodological quality of publications/studies as assessed by the McHarm scale<sup>1</sup>

1  
2  
3  
4  
5  
6  
7  
8  
9  
10  
11  
12  
13  
14  
15  
16  
17  
18  
19  
20  
21  
22  
23  
24  
25  
26  
27  
28  
29  
30  
31  
32  
33  
34  
35  
36  
37  
38  
39  
40  
41  
42  
43  
44  
45  
46  
47  
48  
49  
50  
51  
52  
53  
54  
55  
56  
57  
58  
59  
60

<sup>2</sup> sum of percentages may not total 100 due to rounding

1. Chou R, Aronson N, Atkins DL. Assessing harms when comparing medication interventions. In: editors. Methods guide for effectiveness and comparative effectiveness reviews. Rockville, MD: Agency for Healthcare Research and Quality (US); 2008. p.

For peer review only

Table 2. Number of studies and participants reporting adverse events\*

| Organ system                       | AE - category               | AE – specific                           | No. of studies | No. of participants |
|------------------------------------|-----------------------------|-----------------------------------------|----------------|---------------------|
| <b>Infection &amp; Respiratory</b> | <b>Severe infections</b>    |                                         | <b>5</b>       | <b>1235</b>         |
|                                    | 1)                          | Sepsis                                  | 1              | 32                  |
|                                    | 2)                          | Superinfection                          | 2              | 354                 |
|                                    | 3)                          | UTI                                     | 1              | 720                 |
|                                    | 4)                          | Streptococcal infection                 | 1              | 129                 |
|                                    | <b>Systemic infections</b>  |                                         | <b>5</b>       | <b>1635</b>         |
|                                    | 1)                          | Fever                                   | 3              | 963                 |
|                                    | 2)                          | Common viral/bacterial/fungal infection | 2              | 792                 |
|                                    | 3)                          | Varicella                               | 3              | 1449                |
|                                    | <b>Lung/trachea</b>         |                                         | <b>10</b>      | <b>2053</b>         |
|                                    | 1)                          | Empyema                                 | 1              | 600                 |
| 2)                                 | Pneumonia                   | 8                                       | 2051           |                     |
| 3)                                 | Respiratory distress        | 2                                       | 2              |                     |
| <b>Upper respiratory tract</b>     |                             | <b>14</b>                               | <b>2457</b>    |                     |
| 1)                                 | Bacterial tracheitis        | 5                                       | 1023           |                     |
| 2)                                 | Sinusitis                   | 2                                       | 849            |                     |
| 3)                                 | Croup                       | 2                                       | 131            |                     |
| 4)                                 | Viral parotitis             | 1                                       | 27             |                     |
| 5)                                 | Pharyngitis                 | 1                                       | 129            |                     |
| 6)                                 | Persistent cough            | 1                                       | 27             |                     |
| 7)                                 | Oral thrush                 | 3                                       | 837            |                     |
| 8)                                 | Otitis media                | 4                                       | 1173           |                     |
| 9)                                 | Ear, nose, throat infection | 3                                       | 862            |                     |
| 10)                                | Nasal discharge             | 1                                       | 720            |                     |
| 11)                                | Eye discharge               | 1                                       | 720            |                     |
|                                    | <b>Voice complaints</b>     |                                         | <b>5</b>       | <b>794</b>          |
| <b>GI</b>                          | <b>GI bleeding</b>          |                                         | <b>8</b>       | <b>2669</b>         |
|                                    | 1)                          | Bleeding                                | 5              | 1577                |
|                                    | 2)                          | Gross hematochezia                      | 1              | 118                 |
|                                    | 3)                          | Occult blood in stools                  | 2              | 292                 |
|                                    | 4)                          | Dark stools                             | 1              | 800                 |
|                                    | <b>Vomiting</b>             |                                         | <b>27</b>      | <b>6067</b>         |
|                                    | 1)                          | Vomiting                                | 24             | 5983                |
|                                    | 2)                          | Nausea                                  | 6              | 586                 |
|                                    | 3)                          | Palatability                            | 3              | 170                 |
|                                    | <b>Abdominal pain</b>       |                                         | <b>5</b>       | <b>1332</b>         |
|                                    | <b>Diarrhea</b>             |                                         | <b>8</b>       | <b>1346</b>         |
|                                    | 1)                          | Diarrhea                                | 7              | 1217                |
|                                    | 2)                          | Gastroenteritis                         | 1              | 129                 |
| <b>CNS &amp; Behaviour</b>         | <b>Tremor/jitteriness</b>   |                                         | <b>8</b>       | <b>1274</b>         |
|                                    | 1)                          | Tremor                                  | 7              | 1226                |
|                                    | 2)                          | Jittery                                 | 1              | 48                  |
|                                    | <b>Behaviour change</b>     |                                         | <b>14</b>      | <b>2078</b>         |
|                                    | 1)                          | Violent behaviour                       | 1              | 198                 |
|                                    | 2)                          | Mood change                             | 7              | 1430                |
|                                    | 3)                          | Hyperactivity                           | 2              | 268                 |

|                                                  |                                            |                                          |           |             |
|--------------------------------------------------|--------------------------------------------|------------------------------------------|-----------|-------------|
|                                                  | 4)                                         | Restlessness                             | 3         | 297         |
|                                                  | 5)                                         | New sleep problems                       | 3         | 408         |
|                                                  | 6)                                         | Emotional distress due to nebulizer mask | 1         | 82          |
|                                                  | 7)                                         | Psychosis                                | 1         | 1           |
|                                                  | <b>Headache</b>                            |                                          | <b>3</b>  | <b>291</b>  |
| <b>Dermatological</b>                            | <b>Burn</b>                                |                                          | <b>1</b>  | <b>198</b>  |
|                                                  | <b>Integument</b>                          |                                          | <b>10</b> | <b>1954</b> |
|                                                  | 1)                                         | Hives                                    | 2         | 199         |
|                                                  | 2)                                         | Rash                                     | 8         | 1954        |
|                                                  | 3)                                         | Eczema                                   | 1         | 129         |
|                                                  | 4)                                         | Eye irritation                           | 2         | 211         |
|                                                  | 5)                                         | Tongue irritation                        | 1         | 82          |
|                                                  | 6)                                         | Positive wheal                           | 1         | 1           |
|                                                  | 7)                                         | Bleeding from ear                        | 1         | 720         |
|                                                  | <b>Phlebitis</b>                           |                                          | <b>1</b>  | <b>32</b>   |
| <b>Endocrine/Metabolic &amp; Musculoskeletal</b> | <b>Fluid and electrolyte abnormalities</b> |                                          | <b>7</b>  | <b>1849</b> |
|                                                  | 1)                                         | Hyperkalemia                             | 1         | 800         |
|                                                  | 2)                                         | Hyperglycemia                            | 3         | 154         |
|                                                  | 3)                                         | Glycosuria                               | 1         | 125         |
|                                                  | 4)                                         | Sodium retention                         | 1         | 50          |
|                                                  | 5)                                         | Dehydration                              | 1         | 720         |
|                                                  | <b>Growth</b>                              |                                          | <b>6</b>  | <b>731</b>  |
|                                                  | <b>Adrenal suppression</b>                 |                                          | <b>5</b>  | <b>249</b>  |
|                                                  | <b>Bone health</b>                         |                                          | <b>5</b>  | <b>579</b>  |
| <b>Cardiovascular</b>                            | <b>Arrhythmia</b>                          |                                          | <b>3</b>  | <b>312</b>  |
|                                                  | 1)                                         | Tachycardia                              | 2         | 178         |
|                                                  | 2)                                         | Palpitations                             | 1         | 134         |
|                                                  | <b>Hypertension</b>                        |                                          | <b>5</b>  | <b>1491</b> |
|                                                  | <b>Congestive heart failure</b>            |                                          | <b>1</b>  | <b>50</b>   |
| <b>General</b>                                   | <b>General complaints</b>                  |                                          | <b>5</b>  | <b>1146</b> |
|                                                  | 1)                                         | Dizziness                                | 1         | 87          |
|                                                  | 2)                                         | Pallor                                   | 2         | 869         |
|                                                  | 3)                                         | Excessive urination                      | 1         | 134         |
|                                                  | 4)                                         | Normal tooth eruption                    | 1         | 56          |
|                                                  | <b>Hematology, gum bleeding</b>            |                                          | <b>1</b>  | <b>1</b>    |
| <b>Immune System &amp; Oncology</b>              | <b>Immunosuppression</b>                   |                                          | <b>4</b>  | <b>147</b>  |
|                                                  | 1)                                         | Immunosuppression                        | 3         | 146         |
|                                                  | 2)                                         | Tumor cell proliferation                 | 1         | 1           |

AE: adverse event; CNS: central nervous system; GI: gastro-intestinal; no.: number; URT: upper respiratory tract  
 \* Each adverse event was clustered into its related organ system; a panel of clinicians ranked each AE category and its corresponding adverse events in order of clinical significance/severity. The organ systems are presented in order of frequency of reporting, beginning with the most frequently reported (i.e., Infection & respiratory).



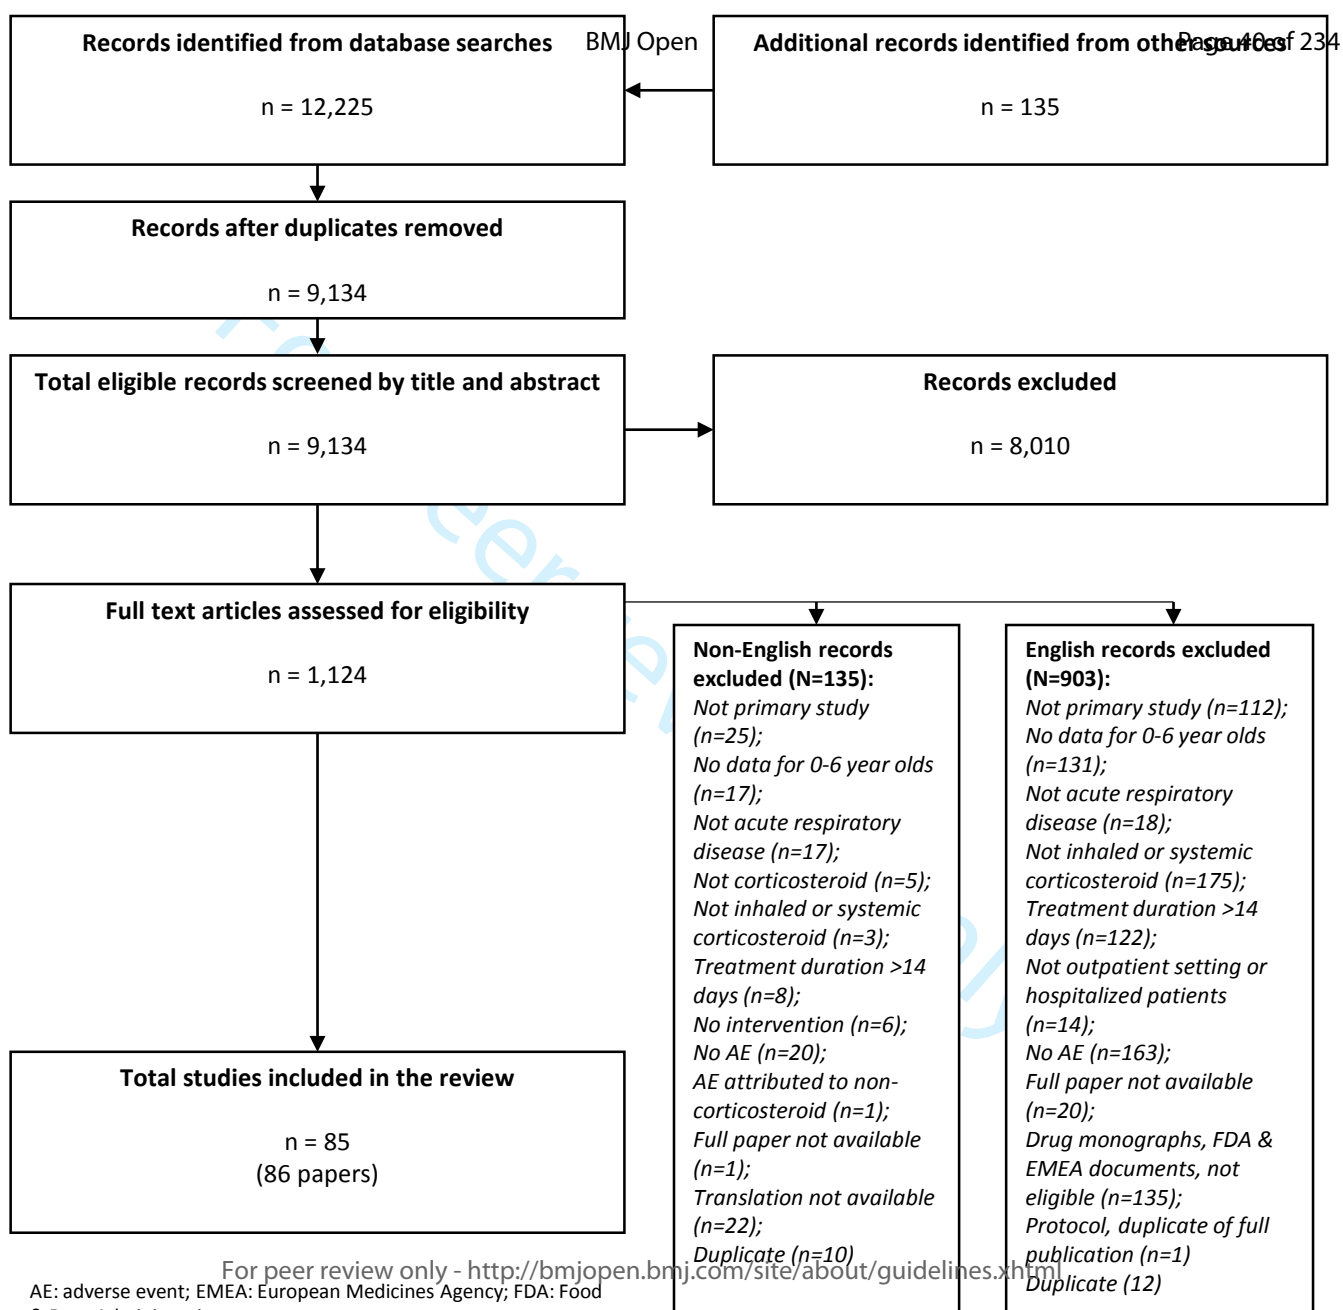

1  
2  
3  
4  
5  
6  
7  
8  
9  
10  
11  
12  
13  
14  
15  
16  
17  
18  
19  
20  
21  
22  
23  
24  
25  
26  
27  
28  
29  
30  
31  
32  
33  
34  
35  
36  
37  
38  
39  
40  
41  
42  
43  
44  
45  
46  
47  
48  
49  
50  
51  
52  
53  
54  
55  
56  
57  
58  
59  
60

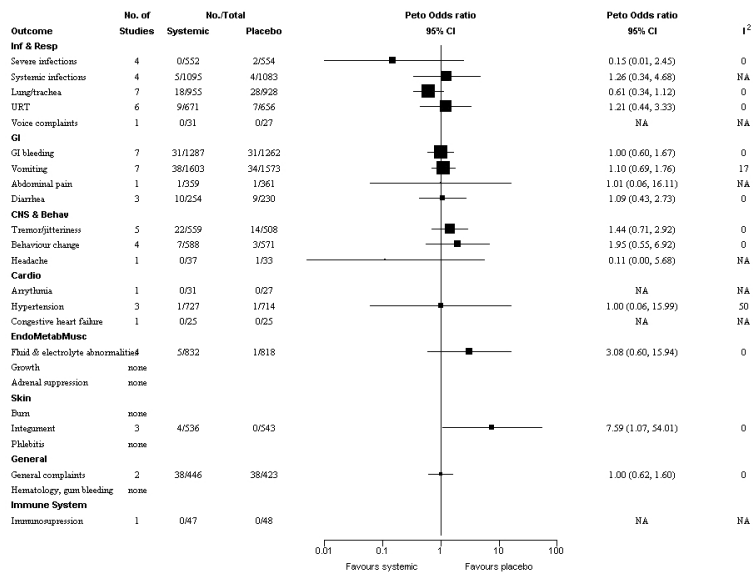

Figure 2. Forest plot of adverse events - systemic vs. placebo

101x101mm (300 x 300 DPI)

1  
2  
3  
4  
5  
6  
7  
8  
9  
10  
11  
12  
13  
14  
15  
16  
17  
18  
19  
20  
21  
22  
23  
24  
25  
26  
27  
28  
29  
30  
31  
32  
33  
34  
35  
36  
37  
38  
39  
40  
41  
42  
43  
44  
45  
46  
47  
48  
49  
50  
51  
52  
53  
54  
55  
56  
57  
58  
59  
60

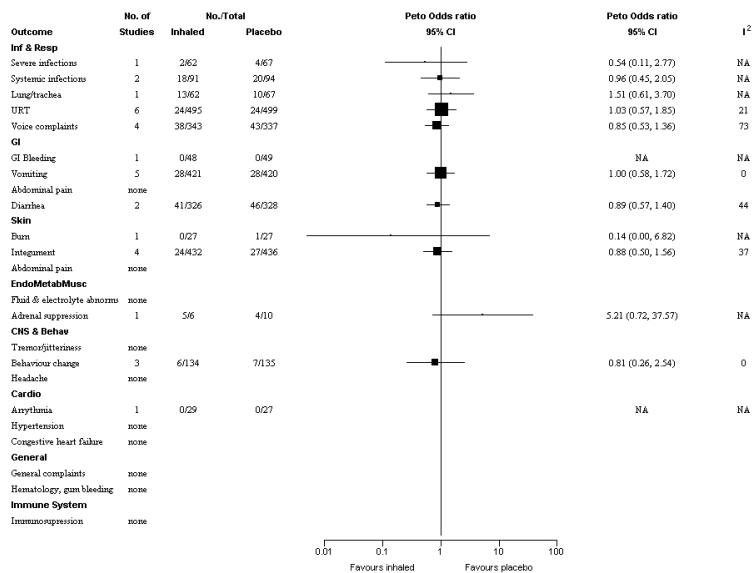

Figure 3. Forest plot of adverse events - inhaled vs. placebo

101x101mm (300 x 300 DPI)

1  
2  
3  
4  
5  
6  
7  
8  
9  
10  
11  
12  
13  
14  
15  
16  
17  
18  
19  
20  
21  
22  
23  
24  
25  
26  
27  
28  
29  
30  
31  
32  
33  
34  
35  
36  
37  
38  
39  
40  
41  
42  
43  
44  
45  
46  
47  
48  
49  
50  
51  
52  
53  
54  
55  
56  
57  
58  
59  
60

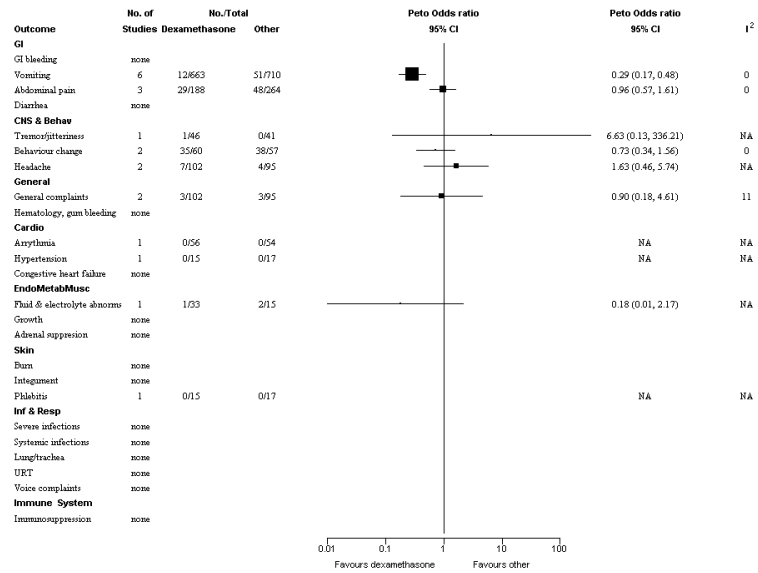

Figure 4. Forest plot of adverse events - dexamethasone vs. other

101x101mm (300 x 300 DPI)

### Supplement 1. Search strategy

**Database for original search:** Ovid Medline(R) 1946 to September Week 1 2014

**Databases for update searches:** Ovid MEDLINE(R) Epub Ahead of Print, In-Process & Other Non-Indexed Citations, Ovid MEDLINE(R) Daily and Ovid MEDLINE(R) 1946 to Present

**Date original search conducted:** 14 September 2014

**Date first update search conducted:** 24 February 2016

**Date second update search conducted:** 31 July 2017

#### Strategy:

1. Adrenal Cortex Hormones/
2. Anti-Inflammatory Agents/
3. Beclomethasone/
4. Budesonide/
5. exp Glucocorticoids/
6. exp Hydroxycorticosteroids/
7. Pregnenediones/
8. Triamcinolone Acetonide/
9. adrenal cortex hormone\*.tw,nm.
10. advair\*.tw,nm.
11. alvesco\*.tw,nm.
12. azmacort\*.tw,nm.
13. becl?met\*.tw,nm.
14. beclazone\*.tw,nm.
15. beclo?ort\*.tw,nm.
16. beclovent\*.tw,nm.
17. beconase\*.tw,nm.
18. becotide\*.tw,nm.
19. betamet?asone\*.tw,nm.
20. betnesol\*.tw,nm.
21. budesonide\*.tw,nm.
22. ciclesonide\*.tw,nm.
23. clobetasol\*.tw,nm.
24. cortiso\*.tw,nm.
25. cortodoxone\*.tw,nm.
26. corticosteroid\*.tw,nm.
27. decadron\*.tw,nm.
28. depo medrone\*.tw,nm.
29. desoximet?asone\*.tw,nm.
30. dexamethasone\*.tw,nm.
31. deflazacort\*.tw,nm.
32. diflucortolone\*.tw,nm.
33. flixotide\*.tw,nm.
34. flumethasone\*.tw,nm.

- 1
- 2
- 3 35. flunisolide\*.tw,nm.
- 4 36. fluocino\*.tw,nm.
- 5 37. fluocortolone\*.tw,nm.
- 6 38. fluorometholone\*.tw,nm.
- 7 39. flurandrenolone\*.tw,nm.
- 8 40. fluticasone\*.tw,nm.
- 9 41. glucocortico\*.tw,nm.
- 10 42. hydrocortisone\*.tw,nm.
- 11 43. hydroxycorticostero\*.tw,nm.
- 12 44. hydrocortone\*.tw,nm.
- 13 45. hydroxypregnenolone\*.tw,nm.
- 14 46. kenacort\*.tw,nm.
- 15 47. kenalog\*.tw,nm.
- 16 48. medrone\*.tw,nm.
- 17 49. methylprednisolone\*.tw,nm.
- 18 50. mometasone furoate\*.tw,nm.
- 19 51. nasonex\*.tw,nm.
- 20 52. paramethasone\*.tw,nm.
- 21 53. predniso\*.tw,nm.
- 22 54. pregnenolone\*.tw,nm.
- 23 55. pulmicort\*.tw,nm.
- 24 56. qvar\*.tw,nm.
- 25 57. rhinocort\*.tw,nm.
- 26 58. seretide\*.tw,nm.
- 27 59. solu cortef\*.tw,nm.
- 28 60. symbicort\*.tw,nm.
- 29 61. tetrahydrocortisol\*.tw,nm.
- 30 62. triamcinolone\*.tw,nm.
- 31 63. tricort\*.tw,nm.
- 32 64. vanceril\*.tw,nm.
- 33 65. or/1-64
- 34 66. Acute Disease/ and (asthma\* or pneumonia\* or wheez\*).mp.
- 35 67. exp Asthma/ and (acute\* or emergenc\* or exacerbation\* or severe\*).mp.
- 36 68. Bronchial Hyperreactivity/
- 37 69. Bronchial Spasm/
- 38 70. exp Bronchiolitis/
- 39 71. Croup/
- 40 72. exp Dyspnea/
- 41 73. Emergencies/ and (asthma\* or pneumonia\* or wheez\*).mp.
- 42 74. Emergency Medical Services/ and (asthma\* or pneumonia\* or wheez\*).mp.
- 43 75. Emergency Services, Hospital/ and (asthma\* or pneumonia\* or wheez\*).mp.
- 44 76. exp Pharyngitis/
- 45 77. exp Pneumonia/ and (acute\* or emergenc\* or exacerbation\* or severe\*).mp.
- 46 78. exp Respiratory Syncytial Viruses/
- 47
- 48
- 49
- 50
- 51
- 52
- 53
- 54
- 55
- 56
- 57
- 58
- 59
- 60

- 1
- 2
- 3 79. exp Respiratory Syncytial Virus Infections/
- 4 80. Rhinitis/
- 5 81. exp Sinusitis/
- 6 82. Status Asthmaticus/
- 7
- 8 83. Respiratory Sounds/ and (acute\* or emergenc\* or exacerbation\* or severe\*).mp.
- 9 84. ((acute\* or emergenc\* or exacerbation\* or severe\*) adj5 (asthma\* or pneumonia\* or wheez\*)).tw.
- 10 85. (breath\* adj2 (difficult\* or gasp\* or hard\* or labo?r\* or shallow\* or short\*)).tw.
- 11 86. (bronch\* adj3 (constrict\* or spas\*)).tw.
- 12 87. bronchiolitis\*.tw.
- 13 88. bronchoconstrict\*.tw.
- 14 89. bronchospasm\*.tw.
- 15 90. croup\*.tw.
- 16 91. dyspne\*.tw.
- 17 92. (lung\* adj2 (disease\* or infect\*)).tw.
- 18 93. ((naso pharynx or nasopharynx or para nasal or paranasal or sinus\*) adj3 (infect\* or inflam\*)).tw.
- 19 94. (nasosinusit\* or rhinosinusit\*).tw.
- 20 95. pharyngitis\*.tw.
- 21 96. (respiratory adj2 (attack\* or infect\* or inflam\* or virus\*)).tw.
- 22 97. rhinit\*.tw.
- 23 98. sinusit\*.tw.
- 24 99. tonsillitis\*.tw.
- 25 100. or/66-99
- 26 101. exp child/
- 27 102. exp infant/
- 28 103. exp Pediatrics/
- 29 104. (baby\* or babies or child\* or infant\* or infancy or neonat\* or newborn\*).mp.
- 30 105. (boy\* or girl\* or paediatric\* or peadiatric\* or pediatric\* or prepubescen\*).mp.
- 31 106. or/101-105
- 32 107. and/65,100,106 [steroids/respiratory illness/children]
- 33 108. randomized controlled trial.pt.
- 34 109. controlled clinical trial.pt.
- 35 110. randomi?ed.ab.
- 36 111. placebo.ab.
- 37 112. drug therapy.fs.
- 38 113. randomly.ab.
- 39 114. trial.ab.
- 40 115. groups.ab.
- 41 116. or/108-115
- 42 117. exp Case control studies/
- 43 118. case reports.pt.
- 44 119. Cross-sectional studies/
- 45 120. exp Cohort Studies/
- 46 121. Epidemiologic studies/
- 47 122. case control.tw.
- 48
- 49
- 50
- 51
- 52
- 53
- 54
- 55
- 56
- 57
- 58
- 59
- 60

123. (case adj (report\* or study or studies or series)).tw.
124. cohort analy\*.tw.
125. (cohort adj (study or studies)).tw.
126. cross sectional.tw.
127. (follow up adj (study or studies)).tw.
128. longitudinal.tw.
129. (observational adj (study or studies)).tw.
130. retrospective.tw.
131. or/117-130
132. 116 or 131
133. exp animals/ not humans.sh.
134. 132 not 133
135. 107 and 134
136. (comment or editorial or letter or meta analysis or review).pt.
137. 135 not 136
138. remove duplicates from 137

**Database for original search:** Ovid Medline(R) In-Process & Other Non-Indexed Citations, September 12, 2014

**Date original search conducted:** 14 September 2014

**Strategy:**

1. adrenal cortex hormone\*.tw,nm.
2. advair\*.tw,nm.
3. alvesco\*.tw,nm.
4. azmacort\*.tw,nm.
5. becl?met\*.tw,nm.
6. beclazone\*.tw,nm.
7. beclo?ort\*.tw,nm.
8. beclovent\*.tw,nm.
9. beconase\*.tw,nm.
10. becotide\*.tw,nm.
11. betamet?asone\*.tw,nm.
12. betnesol\*.tw,nm.
13. budesonide\*.tw,nm.
14. ciclesonide\*.tw,nm.
15. clobetasol\*.tw,nm.
16. cortiso\*.tw,nm.
17. cortodoxone\*.tw,nm.
18. corticosteroid\*.tw,nm.
19. decadron\*.tw,nm.
20. depo medrone\*.tw,nm.
21. desoximet?asone\*.tw,nm.
22. dexamethasone\*.tw,nm.



23. deflazacort\*.tw,nm.
24. diflucortolone\*.tw,nm.
25. flixotide\*.tw,nm.
26. flumethasone\*.tw,nm.
27. flunisolide\*.tw,nm.
28. fluocino\*.tw,nm.
29. fluocortolone\*.tw,nm.
30. fluorometholone\*.tw,nm.
31. flurandrenolone\*.tw,nm.
32. fluticasone\*.tw,nm.
33. glucocortico\*.tw,nm.
34. hydrocortisone\*.tw,nm.
35. hydroxycorticostero\*.tw,nm.
36. hydrocortone\*.tw,nm.
37. hydroxypregnenolone\*.tw,nm.
38. kenacort\*.tw,nm.
39. kenalog\*.tw,nm.
40. medrone\*.tw,nm.
41. methylprednisolone\*.tw,nm.
42. mometasone furoate\*.tw,nm.
43. nasonex\*.tw,nm.
44. paramethasone\*.tw,nm.
45. predniso\*.tw,nm.
46. pregnenolone\*.tw,nm.
47. pulmicort\*.tw,nm.
48. qvar\*.tw,nm.
49. rhinocort\*.tw,nm.
50. seretide\*.tw,nm.
51. solu cortef\*.tw,nm.
52. symbicort\*.tw,nm.
53. tetrahydrocortisol\*.tw,nm.
54. triamcinolone\*.tw,nm.
55. tricort\*.tw,nm.
56. vanceril\*.tw,nm.
57. or/1-56
58. ((acute\* or emergenc\* or exacerbation\* or severe\*) adj5 (asthma\* or pneumonia\* or wheez\*)).tw.
59. (breath\* adj2 (difficult\* or gasp\* or hard\* or labo?r\* or shallow\* or short\*)).tw.
60. (bronch\* adj3 (constrict\* or spas\*)).tw.
61. bronchiolitis\*.tw.
62. bronchoconstrict\*.tw.
63. bronchospasm\*.tw.
64. croup\*.tw.
65. dyspne\*.tw.
66. (lung\* adj2 (disease\* or infect\*)).tw.

- 1
- 2
- 3 67. ((naso pharynx or nasopharynx or para nasal or paranasal or sinus\*) adj3 (infect\* or inflam\*)).tw.
- 4 68. (nasosinusit\* or rhinosinusit\*).tw.
- 5 69. pharyngitis\*.tw.
- 6 70. (respiratory adj2 (attack\* or infect\* or inflam\* or virus\*)).tw.
- 7 71. rhinit\*.tw.
- 8 72. sinusit\*.tw.
- 9 73. tonsillitis\*.tw.
- 10 74. or/58-73
- 11 75. (baby\* or babies or child\* or infant\* or infancy or neonat\* or newborn\*).tw.
- 12 76. (boy\* or girl\* or paediatric\* or peadiatric\* or pediatric\* or prepubescen\*).tw.
- 13 77. or/75,76
- 14 78. and/57,74,77
- 15 79. randomi?ed.tw.
- 16 80. placebo.tw.
- 17 81. randomly.tw.
- 18 82. trial.tw.
- 19 83. groups.tw.
- 20 84. or/79-83
- 21 85. case control.tw.
- 22 86. (case adj (report\* or study or studies or series)).tw.
- 23 87. cohort analy\*.tw.
- 24 88. (cohort adj (study or studies)).tw.
- 25 89. cross sectional.tw.
- 26 90. (follow up adj (study or studies)).tw.
- 27 91. longitudinal.tw.
- 28 92. (observational adj (study or studies)).tw.
- 29 93. retrospective.tw.
- 30 94. or/85-93
- 31 95. 84 or 94
- 32 96. 78 and 95
- 33 97. (comment\* or editorial\* or letter\*).mp.
- 34 98. 96 not 97
- 35 99. remove duplicates from 98
- 36
- 37
- 38
- 39
- 40
- 41
- 42
- 43

**Database:** Cochrane Central Register of Controlled Trials (CENTRAL) via Wiley Cochrane Library

**Date original search conducted:** 14 September 2014

**Date first update search conducted:** 24 February 2016

**Date second update search conducted:** 31 July 2017

**Strategy:**

- 51 1. [mh ^ "Adrenal Cortex Hormones"]
- 52 2. [mh ^ "Anti-Inflammatory Agents"]
- 53 3. [mh ^ Beclomethasone]
- 54 4. [mh ^ Budesonide]
- 55
- 56
- 57
- 58
- 59
- 60

- 1
- 2
- 3 5. [mh Glucocorticoids]
- 4 6. [mh Hydroxycorticosteroids]
- 5 7. [mh ^ Pregnenediones]
- 6 8. [mh ^ "Triamcinolone Acetonide"]
- 7 9. "adrenal cortex" next hormone\*:ti,ab,kw
- 8 10. advair\*:ti,ab,kw
- 9 11. alvesco\*:ti,ab,kw
- 10 12. azmacort\*:ti,ab,kw
- 11 13. becl?met\*:ti,ab,kw
- 12 14. beclazone\*:ti,ab,kw
- 13 15. beclo?ort\*:ti,ab,kw
- 14 16. beclovent\*:ti,ab,kw
- 15 17. beconase\*:ti,ab,kw
- 16 18. becotide\*:ti,ab,kw
- 17 19. betamet?asone\*:ti,ab,kw
- 18 20. betnesol\*:ti,ab,kw
- 19 21. budesonide\*:ti,ab,kw
- 20 22. ciclesonide\*:ti,ab,kw
- 21 23. clobetasol\*:ti,ab,kw
- 22 24. cortiso\*:ti,ab,kw
- 23 25. cortodoxone\*:ti,ab,kw
- 24 26. corticosteroid\*:ti,ab,kw
- 25 27. decadron\*:ti,ab,kw
- 26 28. depo next medrone\*:ti,ab,kw
- 27 29. desoximet?asone\*:ti,ab,kw
- 28 30. dexamethasone\*:ti,ab,kw
- 29 31. deflazacort\*:ti,ab,kw
- 30 32. diflucortolone\*:ti,ab,kw
- 31 33. flixotide\*:ti,ab,kw
- 32 34. flumethasone\*:ti,ab,kw
- 33 35. flunisolide\*:ti,ab,kw
- 34 36. fluocino\*:ti,ab,kw
- 35 37. fluocortolone\*:ti,ab,kw
- 36 38. fluorometholone\*:ti,ab,kw
- 37 39. flurandrenolone\*:ti,ab,kw
- 38 40. fluticasone\*:ti,ab,kw
- 39 41. glucocortico\*:ti,ab,kw
- 40 42. hydrocortisone\*:ti,ab,kw
- 41 43. hydroxycorticostero\*:ti,ab,kw
- 42 44. hydrocortone\*:ti,ab,kw
- 43 45. hydroxypregnenolone\*:ti,ab,kw
- 44 46. kenacort\*:ti,ab,kw
- 45 47. kenalog\*:ti,ab,kw
- 46 48. medrone\*:ti,ab,kw
- 47
- 48
- 49
- 50
- 51
- 52
- 53
- 54
- 55
- 56
- 57
- 58
- 59
- 60

- 1
- 2
- 3
- 4 49. methylprednisolone\*:ti,ab,kw
- 5 50. mometasone next furoate\*:ti,ab,kw
- 6 51. nasonex\*:ti,ab,kw
- 7 52. paramethasone\*:ti,ab,kw
- 8 53. predniso\*:ti,ab,kw
- 9 54. pregnenolone\*:ti,ab,kw
- 10 55. pulmicort\*:ti,ab,kw
- 11 56. qvar\*:ti,ab,kw
- 12 57. rhinocort\*:ti,ab,kw
- 13 58. seretide\*:ti,ab,kw
- 14 59. solu next cortef\*:ti,ab,kw
- 15 60. symbicort\*:ti,ab,kw
- 16 61. tetrahydrocortisol\*:ti,ab,kw
- 17 62. triamcinolone\*:ti,ab,kw
- 18 63. tricort\*:ti,ab,kw
- 19 64. vanceril\*:ti,ab,kw
- 20 65. {OR #1-#64}
- 21 66. [mh ^ "Acute Disease"] and (asthma\* or pneumonia\* or wheez\*)
- 22 67. [mh Asthma] and (acute\* or emergenc\* or exacerbation\* or severe\*)
- 23 68. [mh "Bronchial Hyperreactivity"]
- 24 69. [mh "Bronchial Spasm"]
- 25 70. [mh Bronchiolitis]
- 26 71. [mh ^ Croup]
- 27 72. [mh Dyspnea]
- 28 73. [mh ^ Emergencies] and (asthma\* or pneumonia\* or wheez\*)
- 29 74. [mh ^ "Emergency Medical Services"] and (asthma\* or pneumonia\* or wheez\*)
- 30 75. [mh ^ "Emergency Services, Hospital"] and (asthma\* or pneumonia\* or wheez\*)
- 31 76. [mh Pharyngitis]
- 32 77. [mh Pneumonia] and (acute\* or emergenc\* or exacerbation\* or severe\*)
- 33 78. [mh "Respiratory Syncytial Viruses"]
- 34 79. [mh "Respiratory Syncytial Virus Infections"]
- 35 80. [mh Rhinitis]
- 36 81. [mh Sinusitis]
- 37 82. [mh ^ "Status Asthmaticus"]
- 38 83. [mh ^ "Respiratory Sounds"] and (acute\* or emergenc\* or exacerbation\* or severe\*)
- 39 84. ((acute\* or emergenc\* or exacerbation\* or severe\*) near/5 (asthma\* or pneumonia\* or wheez\*)):ti,ab,kw
- 40 85. (breath\* near/2 (difficult\* or gasp\* or hard\* or labo?r\* or shallow\* or short\*)):ti,ab,kw
- 41 86. (bronch\* near/3 (constrict\* or spas\*)):ti,ab,kw
- 42 87. bronchiolitis\*:ti,ab,kw
- 43 88. bronchoconstrict\*:ti,ab,kw
- 44 89. bronchospasm\*:ti,ab,kw
- 45 90. croup\*:ti,ab,kw
- 46 91. dyspne\*:ti,ab,kw
- 47
- 48
- 49
- 50
- 51
- 52
- 53
- 54
- 55
- 56
- 57
- 58
- 59
- 60

- 1
- 2
- 3 92. (lung\* near/2 (disease\* or infect\*)):ti,ab,kw
- 4 93. (("naso pharynx" or nasopharynx\* or "para nasal" or paranasal\* or sinus\*) near/3 (infect\* or
- 5 inflam\*)):ti,ab,kw
- 6 94. (nasosinusit\* or rhinosinusit\*):ti,ab,kw
- 7 95. pharyngitis\*:ti,ab,kw
- 8 96. (respiratory\* near/2 (attack\* or infect\* or inflam\* or virus\*)):ti,ab,kw
- 9 97. rhinit\*:ti,ab,kw
- 10 98. sinusit\*:ti,ab,kw
- 11 99. tonsillitis\*:ti,ab,kw
- 12 100. {or #66-#99}
- 13 101. [mh child]
- 14 102. [mh infant]
- 15 103. [mh Pediatrics]
- 16 104. (baby\* or babies or child\* or infant\* or infancy or neonat\* or newborn\*):ti,ab,kw
- 17 105. (boy\* or girl\* or paediatric\* or peadiatric\* or pediatric\* or prepubescen\*):ti,ab,kw
- 18 106. {or #101-#105}
- 19 107. #65 and #100 and #106
- 20 108. #65 and #100 and #106 in Trials
- 21
- 22
- 23
- 24
- 25

26 **Database:** Ovid Embase 1974 to 2014 September 12

27 **Date original search conducted:** 14 September 2014

28 **Strategy:**

- 29
- 30
- 31 1. antiinflammatory agent/
- 32 2. beclometasone/
- 33 3. budesonide/
- 34 4. corticosteroid/
- 35 5. exp glucocorticoid/
- 36 6. hydroxycorticosteroid/
- 37 7. pregnane derivitative/
- 38 8. triamcinolone acetone/
- 39 9. adrenal cortex hormone\*.tw,tn.
- 40 10. advair\*.tw,tn.
- 41 11. alvesco\*.tw,tn.
- 42 12. azmacort\*.tw,tn.
- 43 13. becl?met\*.tw,tn.
- 44 14. beclazone\*.tw,tn.
- 45 15. beclo?ort\*.tw,tn.
- 46 16. beclovent\*.tw,tn.
- 47 17. beconase\*.tw,tn.
- 48 18. becotide\*.tw,tn.
- 49 19. betamet?asone\*.tw,tn.
- 50 20. betnesol\*.tw,tn.
- 51 21. budesonide\*.tw,tn.
- 52
- 53
- 54
- 55
- 56
- 57
- 58
- 59
- 60

- 1
- 2
- 3 22. ciclesonide\*.tw,tn.
- 4 23. clobetasol\*.tw,tn.
- 5 24. cortiso\*.tw,tn.
- 6 25. cortodoxone\*.tw,tn.
- 7 26. corticosteroid\*.tw,tn.
- 8 27. decadron\*.tw,tn.
- 9 28. depo medrone\*.tw,tn.
- 10 29. desoximet?asone\*.tw,tn.
- 11 30. dexamethasone\*.tw,tn.
- 12 31. deflazacort\*.tw,tn.
- 13 32. diflucortolone\*.tw,tn.
- 14 33. flixotide\*.tw,tn.
- 15 34. flumethasone\*.tw,tn.
- 16 35. flunisolide\*.tw,tn.
- 17 36. fluocino\*.tw,tn.
- 18 37. fluocortolone\*.tw,tn.
- 19 38. fluorometholone\*.tw,tn.
- 20 39. flurandrenolone\*.tw,tn.
- 21 40. fluticasone\*.tw,tn.
- 22 41. glucocortico\*.tw,tn.
- 23 42. hydrocortisone\*.tw,tn.
- 24 43. hydroxycorticostero\*.tw,tn.
- 25 44. hydrocortone\*.tw,tn.
- 26 45. hydroxypregnenolone\*.tw,tn.
- 27 46. kenacort\*.tw,tn.
- 28 47. kenalog\*.tw,tn.
- 29 48. medrone\*.tw,tn.
- 30 49. methylprednisolone\*.tw,tn.
- 31 50. mometasone furoate\*.tw,tn.
- 32 51. nasonex\*.tw,tn.
- 33 52. paramethasone\*.tw,tn.
- 34 53. predniso\*.tw,tn.
- 35 54. pregnenolone\*.tw,tn.
- 36 55. pulmicort\*.tw,tn.
- 37 56. qvar\*.tw,tn.
- 38 57. rhinocort\*.tw,tn.
- 39 58. seretide\*.tw,tn.
- 40 59. solu cortef\*.tw,tn.
- 41 60. symbicort\*.tw,tn.
- 42 61. tetrahydrocortisol\*.tw,tn.
- 43 62. triamcinolone\*.tw,tn.
- 44 63. tricort\*.tw,tn.
- 45 64. vanceril\*.tw,tn.
- 46 65. or/1-64
- 47
- 48
- 49
- 50
- 51
- 52
- 53
- 54
- 55
- 56
- 57
- 58
- 59
- 60

- 1
- 2
- 3
- 4 66. acute disease/ and (asthma\* or pneumonia\* or wheez\*).mp.
- 5 67. exp asthma/ and (acute\* or emergenc\* or exacerbation\* or severe\*).mp.
- 6 68. exp breathing disorder/ and (acute\* or emergenc\* or exacerbation\* or severe\*).mp.
- 7 69. bronchospasm/
- 8 70. bronchus hyperreactivity/
- 9 71. exp bronchiolitis/
- 10 72. croup/
- 11 73. exp dyspnea/
- 12 74. emergency/ and (asthma\* or pneumonia\* or wheez\*).mp.
- 13 75. emergency health service/ and (asthma\* or pneumonia\* or wheez\*).mp.
- 14 76. exp emergency treatment/ and (asthma\* or pneumonia\* or wheez\*).mp.
- 15 77. emergency ward/ and (asthma\* or pneumonia\* or wheez\*).mp.
- 16 78. exp pharyngitis/
- 17 79. exp pneumonia/ and (acute\* or emergenc\* or exacerbation\* or severe\*).mp.
- 18 80. Respiratory syncytial pneumovirus/
- 19 81. respiratory syncytial virus infection/
- 20 82. exp rhinitis/
- 21 83. exp sinusitis/
- 22 84. ((acute\* or emergenc\* or exacerbation\* or severe\*) adj5 (asthma\* or pneumonia\* or wheez\*)).tw.
- 23 85. (breath\* adj2 (difficult\* or gasp\* or hard\* or labo?r\* or shallow\* or short\*)).tw.
- 24 86. (bronch\* adj3 (constrict\* or spas\*)).tw.
- 25 87. bronchiolitis\*.tw.
- 26 88. bronchoconstrict\*.tw.
- 27 89. bronchospasm\*.tw.
- 28 90. croup\*.tw.
- 29 91. dyspne\*.tw.
- 30 92. (lung\* adj2 (disease\* or infect\*)).tw.
- 31 93. ((naso pharynx or nasopharynx or para nasal or paranasal or sinus\*) adj3 (infect\* or inflam\*)).tw.
- 32 94. (nasosinusit\* or rhinosinusit\*).tw.
- 33 95. pharyngitis\*.tw.
- 34 96. (respiratory adj2 (attack\* or infect\* or inflam\* or virus\*)).tw.
- 35 97. rhinit\*.tw.
- 36 98. sinusit\*.tw.
- 37 99. tonsillitis\*.tw.
- 38 100. or/66-99
- 39 101. exp child/
- 40 102. exp infant/
- 41 103. exp Pediatrics/
- 42 104. (baby\* or babies or child\* or infant\* or infancy or neonat\* or newborn\*).mp.
- 43 105. (boy\* or girl\* or paediatric\* or peadiatric\* or pediatric\* or prepubescen\*).mp.
- 44 106. or/101-105
- 45 107. and/65,100,106
- 46 108. crossover procedure/
- 47 109. double blind procedure/
- 48
- 49
- 50
- 51
- 52
- 53
- 54
- 55
- 56
- 57
- 58
- 59
- 60

- 1
- 2
- 3 110. randomized controlled trial/
- 4 110. single blind procedure/
- 5 111. allocat\*.tw.
- 6 112. assign\*.tw.
- 7 113. cross over\*.tw.
- 8 114. crossover\*.tw.
- 9 115. doubl\* adj blind\*.tw.
- 10 116. factorial\*.tw.
- 11 117. placebo\*.tw.
- 12 118. random\*.tw.
- 13 119. singl\* adj blind\*.tw.
- 14 120. volunteer\*.tw.
- 15 121. or/108-120
- 16 122. exp case control study/
- 17 123. case report/
- 18 124. case study/
- 19 125. cross-sectional study/
- 20 126. cohort analysis/
- 21 127. case control.tw.
- 22 128. (case adj (report\* or study or studies or series)).tw.
- 23 129. cohort analy\*.tw.
- 24 130. (cohort adj (study or studies)).tw.
- 25 131. cross sectional.tw.
- 26 132. (follow up adj (study or studies)).tw.
- 27 133. longitudinal.tw.
- 28 134. (observational adj (study or studies)).tw.
- 29 135. retrospective.tw.
- 30 136. or/122-135
- 31 137. 121 or 136
- 32 138. animals/ not (animals/ and humans/)
- 33 139. 137 not 138
- 34 140. 107 and 139
- 35 141. (editorial or journal editorial or journal letter or journal note or letter or review).pt.
- 36 142. 140 not 141
- 37 143. limit 142 to embase

**Database:** Drugs@FDA

**URL:** <http://www.accessdata.fda.gov/scripts/cder/drugsatfda/index.cfm>

**Date original search conducted:** 5 September 2014

**Strategy:**

Searched Drugs@FDA for drug name keywords:

1. beclometasone dipropionate
2. budesonide



3. ciclesonide
4. fluticasone propionate
5. mometasone furoate
6. triamcinolone acetonide

Retrieved all available medical and statistical reviews for drugs in these classes with systemic routes of administration

**Database:** Health Canada Drug Products Database

**URL:** <http://www.hc-sc.gc.ca/dhp-mps/prodpharma/databasdon/index-eng.php>

**Date original search conducted:** 8 September 2014

**Strategy:**

Searched Health Canada Drug Products Database for drug name keywords:

1. beclomethasone
2. budesonide
3. ciclesonide
4. fluticasone propionate
5. mometasone furoate
6. triamcinolone acetonide

Retrieved all available monographs for drugs in these classes with systemic routes of administration

**Database:** European Medicines Agency's European Public Assessment Reports

**URL:**

[http://www.ema.europa.eu/ema/index.jsp?curl=pages/medicines/landing/epar\\_search.jsp&mid=WC0b01ac058001d124](http://www.ema.europa.eu/ema/index.jsp?curl=pages/medicines/landing/epar_search.jsp&mid=WC0b01ac058001d124)

**Date original search conducted:** 9, 10 September 2014

**Strategy:**

Searched EMA reports for drug name keywords:

1. beclomethasone
2. beclometasone
3. beclamethasone
4. beclometasone
5. budesonide
6. ciclesonide
7. fluticasone
8. mometasone
9. triamcinolone acetonide
10. Also searched for "corticosteroids" as a pharmaco therapeutic group

Retrieved all available reports for drugs in these classes with systemic routes of administration

## Supplement 2. Eligibility criteria for study inclusion

### INCLUSION/EXCLUSION FORM

Reviewer ID: \_\_\_\_\_ Date: / /2015 Record ID: \_\_\_\_\_

| Criteria | Yes | No | UC |
|----------|-----|----|----|
|----------|-----|----|----|

#### 1. PUBLICATION TYPE

a. Primary research (RCTs, cohort studies, case control studies, case reports, and case series)

Exclude:

- Systematic reviews, letters to editor, commentaries

#### 2. Population

a. Children  $\leq 6$  years of age, where age subgroups data is available:

Unclear:

- If aggregate/subgroup data include but are not limited to age  $\leq 6$  years

Exclude:

- If data is reported in aggregate with older ages

#### 3. CONDITION

a. Children with acute respiratory disease (any of the following):

- Bronchiolitis
- Croup
- Acute wheeze/asthma
- Acute uncomplicated pneumonia (no abscess, effusion, etc)
- Pharyngitis/tonsillitis
- Peritonsillar abscess
- Acute sinusitis
- Respiratory syncytial virus/ rhinovirus/other viruses
- Respiratory distress due to foreign bodies
- PFAPA syndrome

Exclude:

- patients in NICU, PICU
- respiratory distress syndrome (newborn)
- allergic rhinitis
- animal studies

#### 4. Intervention

a. All inhaled\* and systemic (IV, IM, oral) corticosteroids used for  $\leq 14$  days per course, including (but not limited to):

  

- Beclomethasone
- Budesonide
- Ciclesonide
- Dexamethasone
- Fluticasone propionate
- Mometasone furoate
- Prednisolone
- Prednisone
- Triamcinolone acetonide
- combination therapies (e.g. ICS + short-acting beta-agonists)

Exclude

- topical (non-systemic) corticosteroid therapy

\* inhaled (moderate- to high-dose) corticosteroids, following GINA guidelines for low doses for children 5 years and younger (see Box 6-6 below).

### 5. Comparator group (where relevant)

a. Any comparison, including non-pharmacologic interventions which may act similarly to a placebo

  

### 6. OUTCOME

Adverse drug reaction, side effect, adverse effects/events, adverse reactions

  

### 7. Setting

Focus is on outpatient settings (e.g. ambulatory, ED), and hospitalised patients

  

Exclude

- patients in NICU, PICU

Comments:

GINA Global Strategy for Asthma Management and Prevention:

[http://www.ginasthma.org/local/uploads/files/GINA\\_Report\\_2014\\_Jun11.pdf](http://www.ginasthma.org/local/uploads/files/GINA_Report_2014_Jun11.pdf)

#### Box 6-6. Low daily doses of inhaled corticosteroids for children 5 years and younger

| Drug                              | Low daily dose (mcg) |
|-----------------------------------|----------------------|
| Beclomethasone dipropionate (HFA) | 100                  |
| Budesonide pMDI + spacer          | 200                  |

1  
2  
3  
4  
5  
6  
7  
8  
9  
10  
11  
12  
13  
14  
15  
16  
17  
18  
19  
20  
21  
22  
23  
24  
25  
26  
27  
28  
29  
30  
31  
32  
33  
34  
35  
36  
37  
38  
39  
40  
41  
42  
43  
44  
45  
46  
47  
48  
49  
50  
51  
52  
53  
54  
55  
56  
57  
58  
59  
60

|                               |                               |
|-------------------------------|-------------------------------|
| Budesonide nebulized          | 500                           |
| Fluticasone proprionate (HFA) | 100                           |
| Ciclesonide                   | 160                           |
| Mometasone furoate            | Not studied below age 4 years |
| Triamcinolone acetonide       | Not studied in this age group |

For peer review only

**Supplement 3 Characteristics of included studies**

- a. Summary characteristics of included studies p. 1-2
- b. Summary characteristics of included studies - comparisons p. 3-4
- c. Characteristics of included studies p. 5-77

**Supplement 3a. Summary characteristics of included studies**

| <b>Study characteristic</b>                                                     | <b>N (%<sup>1</sup>)</b> |
|---------------------------------------------------------------------------------|--------------------------|
| <b>Country</b>                                                                  |                          |
| Canada                                                                          | 15 (18)                  |
| US                                                                              | 15 (18)                  |
| Australia                                                                       | 7 (8)                    |
| UK                                                                              | 5 (6)                    |
| Denmark                                                                         | 4 (5)                    |
| Finland                                                                         | 4 (5)                    |
| Italy, Netherlands, Taiwan, Thailand                                            | 3, each (14)             |
| China, Greece, Ireland, Israel, Japan, Saudi Arabia (SA), Spain, Sweden, Turkey | 2, each (21)             |
| Brazil, Germany, Mexico, Qatar                                                  | 1, each (5)              |
| SA & UK                                                                         | 1 (1)                    |
| <b>Study designs</b>                                                            |                          |
| RCT (all)                                                                       | 68 (80)                  |
| 2-arm                                                                           | 52 (61)                  |
| 3-arm                                                                           | 7 (8)                    |
| 4-arm non-factorial                                                             | 1 (1)                    |
| factorial 4 x4                                                                  | 4 (5)                    |
| crossover                                                                       | 2 (2)                    |
| trial registry                                                                  | 1 (1)                    |
| conference abstract                                                             | 1 (1)                    |
| Non-RCT                                                                         | 5 (6)                    |
| Cohort                                                                          | 4 (5)                    |
| Case control                                                                    | 1 (1)                    |
| Case series                                                                     | 4 (5)                    |
| Case report                                                                     | 3 (4)                    |
| <b>Number of centres</b>                                                        |                          |
| Single centre                                                                   | 56 (66)                  |
| Multi-centre                                                                    | 24 (28)                  |
| Unclear/NR                                                                      | 5 (6)                    |
| <b>Setting</b>                                                                  |                          |
| Inpatient                                                                       | 41 (48)                  |
| Outpatient                                                                      | 22 (26)                  |
| Inpatient & outpatient                                                          | 21 (25)                  |
| NR                                                                              | 1 (1)                    |
| <b>Funding</b>                                                                  |                          |

|                                                 |                         |
|-------------------------------------------------|-------------------------|
| Not reported                                    | 35 (41)                 |
| Non-industry                                    | 25 (29)                 |
| Industry                                        | 9 (11)                  |
| Industry & non-industry                         | 15 (18)                 |
| No direct funding                               | 1 (1)                   |
| <b>Year of publication, median (range)</b>      | <b>2002 (1964-2017)</b> |
| <b>Respiratory condition</b>                    |                         |
| Asthma                                          | 27 (32)                 |
| Croup                                           | 22 (26)                 |
| Bronchiolitis                                   | 15 (18)                 |
| Wheeze                                          | 14 (16)                 |
| Asthma/croup, palatability & tolerability of CS | 2 (2)                   |
| Pharyngitis                                     | 1 (1)                   |
| Shortness of breath                             | 1 (1)                   |
| Refractory pneumonia                            | 1 (1)                   |
| Bronchiolitis & laryngitis                      | 1 (1)                   |
| Bronchiolitis, viral wheeze & croup             | 1 (1)                   |

CS: corticosteroid; N: number of studies; NR: not reported; RCT: randomized controlled trial; SA: Saudi Arabia; UK: United Kingdom; US: United States

<sup>1</sup>sum of percentages may not total 100 due to rounding

## Supplement 3b. Summary characteristics of included studies – comparisons

| Number of treatment groups | Comparison                                                                                          | No. of studies<br>(no. of patients) | No. of studies<br>contributing<br>data<br>(no. of patients) |
|----------------------------|-----------------------------------------------------------------------------------------------------|-------------------------------------|-------------------------------------------------------------|
| 2-arms                     | Systemic CS vs. placebo/no intervention/standard care                                               | 26 (4166)                           | 15 (3035)                                                   |
|                            | Systemic CS vs. systemic CS                                                                         | 12 (1683)                           | 5 (1051)                                                    |
|                            | Systemic CS vs. non-CS                                                                              | 2 (180)                             | 0                                                           |
|                            | Systemic CS vs. inhaled CS                                                                          | 3 (124)                             | 1 (18)                                                      |
|                            | Systemic CS vs. systemic CS + placebo                                                               | 1 (125)                             | 0                                                           |
|                            | Systemic CS + inhaled CS vs. systemic CS + placebo                                                  | 1 (50)                              | 1 (50)                                                      |
|                            | Inhaled CS vs. placebo/no intervention                                                              | 14 (2367)                           | 8 (1234)                                                    |
|                            | Inhaled CS vs. non-CS                                                                               | 1 (66)                              | 0                                                           |
| 3-arms                     | Systemic CS vs. systemic CS vs. no intervention                                                     | 2 (180)                             | 1 (80)                                                      |
|                            | Systemic CS vs. systemic CS vs. systemic CS                                                         | 5 (624)                             | 2 (354)                                                     |
|                            | Systemic CS vs. inhaled CS vs. non-CS/placebo                                                       | 1 (144)                             | 1 (144)                                                     |
|                            | Systemic CS vs. inhaled CS vs. no CS                                                                | 1 (64)                              | 1 (39)                                                      |
|                            | Systemic CS vs. inhaled CS vs. inhaled CS                                                           | 1 (123)                             | 0                                                           |
|                            | Systemic CS vs. inhaled CS vs. combined (systemic + inhaled)                                        | 1 (198)                             | 1 (197)                                                     |
|                            | Systemic CS + non-CS vs. inhaled CS + sal + non-CS vs. inhaled CS + sal                             | 1 (238)                             | 0                                                           |
|                            | Inhaled CS vs. inhaled CS vs. no CS                                                                 | 1 (80)                              | 1 (80)                                                      |
| 4-arms                     | Systemic CS + terb vs. inhaled CS + terb + placebo vs. non-CS + terb + placebo vs. placebo          | 1 (114)                             | 1 (114)                                                     |
|                            | Systemic CS + sal dose1 vs. systemic CS + sal dose2 vs. sal dose1 + placebo vs. sal dose2 + placebo | 1 (70)                              | 1 (70)                                                      |
|                            | Systemic CS + non-CS vs. systemic CS + sal vs. non-CS + placebo vs. sal + placebo                   | 1 (69)                              | 1 (69)                                                      |
|                            | Systemic CS + non-CS vs. systemic CS + placebo vs. non-CS + placebo vs. placebo + placebo           | 1 (800)                             | 1 (800)                                                     |
|                            | Systemic CS + sal vs. systemic CS + placebo vs. sal + placebo vs. placebo                           | 1 (32)                              | 0                                                           |
|                            | Systemic CS                                                                                         | 5 (5)                               | 0                                                           |

1  
2  
3  
4  
5  
6  
7  
8  
9  
10  
11  
12  
13  
14  
15  
16  
17  
18  
19  
20  
21  
22  
23  
24  
25  
26  
27  
28  
29  
30  
31  
32  
33  
34  
35  
36  
37  
38  
39  
40  
41  
42  
43  
44  
45  
46  
47

|                                       |                           |       |   |
|---------------------------------------|---------------------------|-------|---|
| Non-comparative (case reports/series) | Mode of administration NR | 2 (3) | 0 |
|---------------------------------------|---------------------------|-------|---|

CS: corticosteroid; no.: number; NR: not reported; sal: salbutamol; terb: terbutaline; vs.: versus

For peer review only



## Supplement 3c. Characteristics of included studies

| Author, year<br>Country<br>Funding source               | Study design<br>Setting<br>No. of centres           | Respiratory condition<br>Age (range)                                | Comparators, no. of participants                                                                                                         | Co-interventions;<br>Maintenance CS                                                   | Time points for assessment<br>s;<br>FU                                                                                  | Outcomes related to adverse events                                                                                                                                                                                    |
|---------------------------------------------------------|-----------------------------------------------------|---------------------------------------------------------------------|------------------------------------------------------------------------------------------------------------------------------------------|---------------------------------------------------------------------------------------|-------------------------------------------------------------------------------------------------------------------------|-----------------------------------------------------------------------------------------------------------------------------------------------------------------------------------------------------------------------|
| Alangari<br>2014<br>Saudi Arabia<br>Non-industry funded | RCT<br>ED<br>1                                      | Asthma<br>2-12y                                                     | 1) Budesonide 500mcg/dose, 3 doses 20min apart (neb), n=458<br>2) Placebo saline, 3 doses 20min apart (neb), n=448                       | Salbutamol, ipratropium & prednisolone<br><br>No CS in preceding 7d                   | Baseline, at 1h, 2h, 3h and 4h from the start of medication s;<br>FU 72h post-discharge                                 | The most frequently reported adverse effects were fine tremors (17 cases) and palpitations (11 cases). None of the reported adverse effects was serious, and none was significantly different between the two groups. |
| Alansari<br>2013<br>Qatar<br>Non-industry funded        | RCT<br>Pediatric emergency unit<br>1                | Bronchiolitis<br>≤18mo                                              | 1) Dexamethasone 1.0mg first day, then 0.6mg for 4d (oral) + sal, 5d total (neb), n=102<br>2) Placebo (oral) + sal, 5d total (neb), n=98 | Epinephrine, oxygen & hydration<br><br>No CS in preceding 48h                         | At study entry, then assessed if ready for discharge at 12h, 18h, 24h, 36h & 48h;<br>FU by telephone 1wk post-discharge | Daily telephone surveillance (7 days) revealed no particular side effect concerns in either treatment group.                                                                                                          |
| Aljebab<br>2017<br>Saudi Arabia & UK<br>Unfunded        | Cohort, 3-arm<br>Pediatric ED of hospital (SA & UK) | Asthma/croup, palatability & tolerability<br>2-10y (SA); 2-16y (UK) | SA<br>1) Dexamethasone 0.5mg/5mL elixir (oral), n=33                                                                                     | NR<br><br>Most patients in prednisolone groups had received oral steroids previously; | After each dose (within 10min) & daily on D1-D5                                                                         | In SA and the UK, dexamethasone had the highest palatability scores and                                                                                                                                               |

|    |   |  |                                                                     |                                                                       |  |                                                                                                                                                    |
|----|---|--|---------------------------------------------------------------------|-----------------------------------------------------------------------|--|----------------------------------------------------------------------------------------------------------------------------------------------------|
| 1  | 2 |  | 2) Prednisolone base 5.0mg tablets (oral), n=52                     | however, most patients and none had received oral steroids previously |  | prednisolone base tablets had the lowest.                                                                                                          |
| 2  |   |  | 3) Prednisolone sodium phosphate 15.0mg/mL syrup (oral), n=37       | in the SA & UK dexamethasone groups, respectively                     |  | Palatability scores improved for all formulations of prednisolone with each subsequent daily dose.                                                 |
| 3  |   |  | UK                                                                  |                                                                       |  | In SA, prednisolone base tablets were associated with more nausea (24 vs. 7 patients) and vomiting (5 vs. 0 patients) than sodium phosphate syrup. |
| 4  |   |  | 1) Dexamethasone 2.0mg/5mL elixir (oral), n=53                      |                                                                       |  | In the UK, vomiting occurred more frequently with prednisolone base (8 patients) than sodium phosphate soluble tablets (2 patients) (p=0.041).     |
| 5  |   |  | 2) Prednisolone base 5.0mg tablet (oral), n=38                      |                                                                       |  |                                                                                                                                                    |
| 6  |   |  | 3) Prednisolone sodium phosphate 5.0mg soluble tablets (oral), n=42 |                                                                       |  |                                                                                                                                                    |
| 7  |   |  |                                                                     |                                                                       |  |                                                                                                                                                    |
| 8  |   |  |                                                                     |                                                                       |  |                                                                                                                                                    |
| 9  |   |  |                                                                     |                                                                       |  |                                                                                                                                                    |
| 10 |   |  |                                                                     |                                                                       |  |                                                                                                                                                    |
| 11 |   |  |                                                                     |                                                                       |  |                                                                                                                                                    |
| 12 |   |  |                                                                     |                                                                       |  |                                                                                                                                                    |
| 13 |   |  |                                                                     |                                                                       |  |                                                                                                                                                    |
| 14 |   |  |                                                                     |                                                                       |  |                                                                                                                                                    |
| 15 |   |  |                                                                     |                                                                       |  |                                                                                                                                                    |
| 16 |   |  |                                                                     |                                                                       |  |                                                                                                                                                    |
| 17 |   |  |                                                                     |                                                                       |  |                                                                                                                                                    |
| 18 |   |  |                                                                     |                                                                       |  |                                                                                                                                                    |
| 19 |   |  |                                                                     |                                                                       |  |                                                                                                                                                    |
| 20 |   |  |                                                                     |                                                                       |  |                                                                                                                                                    |
| 21 |   |  |                                                                     |                                                                       |  |                                                                                                                                                    |
| 22 |   |  |                                                                     |                                                                       |  |                                                                                                                                                    |
| 23 |   |  |                                                                     |                                                                       |  |                                                                                                                                                    |
| 24 |   |  |                                                                     |                                                                       |  |                                                                                                                                                    |
| 25 |   |  |                                                                     |                                                                       |  |                                                                                                                                                    |
| 26 |   |  |                                                                     |                                                                       |  |                                                                                                                                                    |
| 27 |   |  |                                                                     |                                                                       |  |                                                                                                                                                    |
| 28 |   |  |                                                                     |                                                                       |  |                                                                                                                                                    |
| 29 |   |  |                                                                     |                                                                       |  |                                                                                                                                                    |
| 30 |   |  |                                                                     |                                                                       |  |                                                                                                                                                    |
| 31 |   |  |                                                                     |                                                                       |  |                                                                                                                                                    |
| 32 |   |  |                                                                     |                                                                       |  |                                                                                                                                                    |
| 33 |   |  |                                                                     |                                                                       |  |                                                                                                                                                    |
| 34 |   |  |                                                                     |                                                                       |  |                                                                                                                                                    |
| 35 |   |  |                                                                     |                                                                       |  |                                                                                                                                                    |
| 36 |   |  |                                                                     |                                                                       |  |                                                                                                                                                    |
| 37 |   |  |                                                                     |                                                                       |  |                                                                                                                                                    |
| 38 |   |  |                                                                     |                                                                       |  |                                                                                                                                                    |
| 39 |   |  |                                                                     |                                                                       |  |                                                                                                                                                    |
| 40 |   |  |                                                                     |                                                                       |  |                                                                                                                                                    |
| 41 |   |  |                                                                     |                                                                       |  |                                                                                                                                                    |
| 42 |   |  |                                                                     |                                                                       |  |                                                                                                                                                    |
| 43 |   |  |                                                                     |                                                                       |  |                                                                                                                                                    |
| 44 |   |  |                                                                     |                                                                       |  |                                                                                                                                                    |
| 45 |   |  |                                                                     |                                                                       |  |                                                                                                                                                    |
| 46 |   |  |                                                                     |                                                                       |  |                                                                                                                                                    |
| 47 |   |  |                                                                     |                                                                       |  |                                                                                                                                                    |
| 48 |   |  |                                                                     |                                                                       |  |                                                                                                                                                    |
| 49 |   |  |                                                                     |                                                                       |  |                                                                                                                                                    |
| 50 |   |  |                                                                     |                                                                       |  |                                                                                                                                                    |
| 51 |   |  |                                                                     |                                                                       |  |                                                                                                                                                    |
| 52 |   |  |                                                                     |                                                                       |  |                                                                                                                                                    |
| 53 |   |  |                                                                     |                                                                       |  |                                                                                                                                                    |
| 54 |   |  |                                                                     |                                                                       |  |                                                                                                                                                    |
| 55 |   |  |                                                                     |                                                                       |  |                                                                                                                                                    |
| 56 |   |  |                                                                     |                                                                       |  |                                                                                                                                                    |
| 57 |   |  |                                                                     |                                                                       |  |                                                                                                                                                    |
| 58 |   |  |                                                                     |                                                                       |  |                                                                                                                                                    |
| 59 |   |  |                                                                     |                                                                       |  |                                                                                                                                                    |
| 60 |   |  |                                                                     |                                                                       |  |                                                                                                                                                    |

|                                      |                                            |              |                                                                                                             |                                                                                       |                                                                                                          |                                                                                                                                                                                                                                                            |
|--------------------------------------|--------------------------------------------|--------------|-------------------------------------------------------------------------------------------------------------|---------------------------------------------------------------------------------------|----------------------------------------------------------------------------------------------------------|------------------------------------------------------------------------------------------------------------------------------------------------------------------------------------------------------------------------------------------------------------|
|                                      |                                            |              |                                                                                                             |                                                                                       |                                                                                                          | In both centres, dexamethasone was associated with less side effects. Vomiting (1 vs. 0 patients), nausea (7 vs. 3 patients), and abdominal pain (10 vs. 8 patients) occurred more with dexamethasone sodium phosphate solution than dexamethasone elixir. |
| Alshehr 2005 Saudi Arabia Funding NR | RCT Emergency rooms & outpatient clinics 3 | Croup 3mo-9y | 1) Dexamethasone 0.6mg/kg, single dose (oral), n=36<br>2) Dexamethasone 0.15mg/kg, single dose (oral), n=36 | Mist therapy, racemic epinephrine, oxygen & antibiotics<br><br>No CS in preceding 4wk | 12h & 24h after treatment & change in total croup scores per 12h intervals within & between study groups | Two patients developed bronchopneumonia on second day of admission as confirmed by chest x-ray and one patient had bacterial tracheitis. All these three patients were in group A (0.6 mg/kg dexamethasone). No adverse events were                        |

|                                                           |                                   |                   |                                                                                                                                |                                          |                                                         |                                                                                                                                                                                                                                                                                                |
|-----------------------------------------------------------|-----------------------------------|-------------------|--------------------------------------------------------------------------------------------------------------------------------|------------------------------------------|---------------------------------------------------------|------------------------------------------------------------------------------------------------------------------------------------------------------------------------------------------------------------------------------------------------------------------------------------------------|
|                                                           |                                   |                   |                                                                                                                                |                                          |                                                         | noted in the group B patients. No patient had a clinical deterioration, either in the emergency room or after discharge and no child had gastrointestinal bleeding or bacterial infection.                                                                                                     |
| Altamimi 2006<br>Canada<br>Non-industry & industry funded | RCT<br>Pediatric<br>hospital<br>1 | Asthma<br>2-16y   | 1) Dexamethasone 0.6mg/kg (max 18mg), single dose (oral), n=67<br>2) Prednisolone 1.0mg/kg (max 30mg) twice daily (oral), n=67 | Salbutamol<br><br>No CS in preceding 2wk | 2d & 5d post-discharge & every week to a maximum of 3wk | Two subjects in the prednisolone group dropped out because of repeated vomiting. Side effects (table 5), n:<br>Abdominal pain (2 dex vs. 3 pred);<br>Vomiting (0 dex vs. 1 pred);<br>Headache (0 dex vs. 0 pred);<br>Palpitation (0 dex vs. 0 pred);<br>Excessive urination (0 dex vs. 1 pred) |
| Bacharier 2008<br>USA                                     | RCT, 3-arm                        | At least 2 wheeze | 1) Montelukast 4.0mg once daily (oral) +                                                                                       | Albuterol, prednisolone &                | Clinic visits 4wk after randomizati                     | The 3 groups did not differ significantly in                                                                                                                                                                                                                                                   |

|                                                                                                                                                                                                                                                                                                               |                                                     |                                              |                                                                                                                                                                                                                                                                                       |                                                                                                    |                                                                                                                                                                                                                                                                                                               |                                                                                                                                                                                                                                                                                                                              |
|---------------------------------------------------------------------------------------------------------------------------------------------------------------------------------------------------------------------------------------------------------------------------------------------------------------|-----------------------------------------------------|----------------------------------------------|---------------------------------------------------------------------------------------------------------------------------------------------------------------------------------------------------------------------------------------------------------------------------------------|----------------------------------------------------------------------------------------------------|---------------------------------------------------------------------------------------------------------------------------------------------------------------------------------------------------------------------------------------------------------------------------------------------------------------|------------------------------------------------------------------------------------------------------------------------------------------------------------------------------------------------------------------------------------------------------------------------------------------------------------------------------|
| <p>1<br/>2<br/>3<br/>4<br/>5<br/>6<br/>7<br/>8<br/>9<br/>10<br/>11<br/>12<br/>13<br/>14<br/>15<br/>16<br/>17<br/>18<br/>19<br/>20<br/>21<br/>22<br/>23<br/>24<br/>25<br/>26<br/>27<br/>28<br/>29<br/>30</p> <p>Non-<br/>industry &amp;<br/>industry<br/>funded</p>                                            | <p>Clinical<br/>center<br/>5</p>                    | <p>episodes in<br/>last year<br/>12-59mo</p> | <p>placebo ICS<br/>twice daily for<br/>7d (neb), n=95<br/>2) Budesonide<br/>1.0mg twice<br/>daily (neb) +<br/>placebo LTRA<br/>once daily (neb),<br/>n=96<br/>3) conventional<br/>therapy +<br/>placebo<br/>(systemic +<br/>inhaled), n=47<br/><br/>Multiple<br/>courses over 1yr</p> | <p>other non-asthma<br/>medications<br/><br/>No more than 6<br/>courses of CS in<br/>past year</p> | <p>on, then<br/>every 8wk;<br/>FU by<br/>phone 2wk<br/>after<br/>randomizati<br/>on,<br/>followed by<br/>calls 4wk<br/>after each<br/>scheduled<br/>clinic visit<br/><br/>Linear<br/>growth in<br/>height or<br/>length<br/>(assessmen<br/>t method<br/>NR) from<br/>baseline to<br/>study end<br/>(12mo)</p> | <p>several other<br/>outcomes<br/>assessed over<br/>the 1-year<br/>trial, including<br/>oral<br/>corticosteroid<br/>use, health<br/>care use,<br/>linear growth,<br/>quality of life,<br/>and<br/>frequencies of<br/>adverse<br/>events.</p>                                                                                 |
| <p>31<br/>32<br/>33<br/>34<br/>35<br/>36<br/>37<br/>38<br/>39<br/>40<br/>41<br/>42<br/>43<br/>44<br/>45<br/>46<br/>47<br/>48<br/>49<br/>50<br/>51<br/>52<br/>53<br/>54<br/>55<br/>56<br/>57<br/>58<br/>59<br/>60</p> <p>Bisgaard<br/>2006<br/>Denmark<br/>Non-<br/>industry &amp;<br/>industry<br/>funded</p> | <p>RCT<br/>Clinical<br/>research<br/>unit<br/>1</p> | <p>Wheeze<br/>1mo</p>                        | <p>1) Budesonide<br/>400mcg/day for<br/>2wk (MDI),<br/>n=149<br/>2) Placebo once<br/>daily for 2wk<br/>(MDI), n=145<br/><br/>Multiple<br/>courses over<br/>3yrs</p>                                                                                                                   | <p>NR<br/>NR</p>                                                                                   | <p>Height &amp;<br/>bone<br/>mineral<br/>density<br/>measured<br/>using<br/>Harpenden<br/>stadiometry<br/>at 3yrs of<br/>age</p>                                                                                                                                                                              | <p>Safety, as<br/>evaluated by<br/>height and<br/>bone mineral<br/>density, were<br/>not affected<br/>by treatment;<br/>the height at<br/>three years of<br/>age measured<br/>by<br/>stadiometry<br/>and bone<br/>mineral<br/>density<br/>measured by<br/>ultrasonograp<br/>hy at the<br/>phalanx were<br/>unaffected by</p> |

|                                                                        |                          |                              |                                                                                                                                          |                                                                                                      |                                                                                                                                                           |                                                                                                                                                                                                                                                                                                                                                                                                                                                                                                                                                                                                                    |
|------------------------------------------------------------------------|--------------------------|------------------------------|------------------------------------------------------------------------------------------------------------------------------------------|------------------------------------------------------------------------------------------------------|-----------------------------------------------------------------------------------------------------------------------------------------------------------|--------------------------------------------------------------------------------------------------------------------------------------------------------------------------------------------------------------------------------------------------------------------------------------------------------------------------------------------------------------------------------------------------------------------------------------------------------------------------------------------------------------------------------------------------------------------------------------------------------------------|
|                                                                        |                          |                              |                                                                                                                                          |                                                                                                      |                                                                                                                                                           | treatment group.                                                                                                                                                                                                                                                                                                                                                                                                                                                                                                                                                                                                   |
| Bjornson<br>2004<br>Canada<br>Non-<br>industry &<br>industry<br>funded | RCT<br>Pediatric ED<br>4 | Croup<br>mean 35+/-<br>23 mo | 1)<br>Dexamethasone<br>0.6mg, max.<br>20.0mg, single<br>dose (oral),<br>n=359<br>2) Placebo<br>solution, single<br>dose (oral),<br>n=361 | Mist, antibiotics &<br>nebulized<br>epinephrine or<br>beta-agonists<br><br>No CS in preceding<br>2wk | D1, D2, D3,<br>D7 & D21<br>after day of<br>treatment;<br>FU<br>interview<br>with parent<br>on D7 and<br>chart and<br>administrative<br>database<br>review | Among the<br>720 patients,<br>there were no<br>cases of<br>gastrointestinal<br>bleeding,<br>complicated<br>varicella, or<br>bacterial<br>tracheitis.<br>There were 7<br>cases of<br>pneumonia (3<br>in the<br>dexamethasone<br>group). All<br>these cases<br>were<br>managed on<br>an outpatient<br>basis, without<br>significant<br>sequelae.<br>Repeated<br>short courses<br>of oral<br>corticosteroids<br>are not<br>associated<br>with long-<br>term negative<br>effects on<br>bone<br>metabolism,<br>bone density<br>or adrenal<br>function.<br>There were<br>no serious<br>adverse<br>events<br>attributable |

|  |  |  |  |  |  |                                                                                                                                                                                                                                                                                                                                                                                                                                                                                                                                                   |
|--|--|--|--|--|--|---------------------------------------------------------------------------------------------------------------------------------------------------------------------------------------------------------------------------------------------------------------------------------------------------------------------------------------------------------------------------------------------------------------------------------------------------------------------------------------------------------------------------------------------------|
|  |  |  |  |  |  | <p>to therapy in any children in our study. However, the study was not sufficiently powered to exclude the possibility of rare adverse events. Supplementary Table 1 list of adverse events, n (dex vs. placebo): Abnormal bowel movements (6 vs. 5); Fever (5 vs. 4); Pneumonia (3 vs. 4); Vomiting or gastroenteritis (3 vs. 4); Otitis media (1 vs. 5); Bronchitis (3 vs. 1); Sore throat (1 vs. 2); Streptococcal throat infection (1 vs. 1); Abdominal pain (1 vs. 1); Rash (2 vs. 0); Dehydration (1 vs. 0); Febrile seizure (1 vs. 0);</p> |
|--|--|--|--|--|--|---------------------------------------------------------------------------------------------------------------------------------------------------------------------------------------------------------------------------------------------------------------------------------------------------------------------------------------------------------------------------------------------------------------------------------------------------------------------------------------------------------------------------------------------------|

|                                       |                       |               |                                                                                                                                                                                                                                                                                            |                |                                                                                                                                                                                                                                    |                                                                                                                                                                                                                                                  |
|---------------------------------------|-----------------------|---------------|--------------------------------------------------------------------------------------------------------------------------------------------------------------------------------------------------------------------------------------------------------------------------------------------|----------------|------------------------------------------------------------------------------------------------------------------------------------------------------------------------------------------------------------------------------------|--------------------------------------------------------------------------------------------------------------------------------------------------------------------------------------------------------------------------------------------------|
|                                       |                       |               |                                                                                                                                                                                                                                                                                            |                |                                                                                                                                                                                                                                    | RSV infection (1 vs. 0);<br>Uncomplicated varicella (0 vs. 1);<br>Urinary tract infection (0 vs. 1);<br>Irritability (1 vs. 1);<br>Eye discharge (1 vs. 0);<br>Sinusitis (0 vs. 1);<br>Bleeding from ear (0 vs. 1);<br>Nasal discharge (1 vs. 0) |
| Brunette 1988<br>Canada<br>Funding NR | NRCT<br>Hospital<br>1 | Asthma<br><6y | 1) Theophylline 8.0mg/kg every 6-8h (oral) + metaproterenol 0.3-0.7 mg/kg every 6-8h (oral)+ prednisone 1.0mg/kg/day for 7-14d (oral), n=16<br>2) Theophylline 8.0mg/kg every 6-8h (oral) + metaproterenol 0.3-0.7mg/kg every 6-8h for 7-14d (oral), n=16<br><br>Multiple courses over 1yr | None<br><br>NR | Monthly or every second month, depending on severity of disease;<br><br>Growth (mean height gain in cm/yr and height as percentile of normal distribution ) assessed (assessment method NR) at the end of each of two 1-yr periods | No side effect was observed in a particular case which received longer duration of corticosteroid (high cumulative corticosteroid dose).<br>Growth and weight gains for all children were within the normal range during the two periods.        |



|                                                        |                                   |                                         |                                                                                                                     |                                                                   |                                                                      |                                                                                                                                                                                                                                                                                                                                                                                                                                                                                                                         |
|--------------------------------------------------------|-----------------------------------|-----------------------------------------|---------------------------------------------------------------------------------------------------------------------|-------------------------------------------------------------------|----------------------------------------------------------------------|-------------------------------------------------------------------------------------------------------------------------------------------------------------------------------------------------------------------------------------------------------------------------------------------------------------------------------------------------------------------------------------------------------------------------------------------------------------------------------------------------------------------------|
| <p>Buckingham 2002<br/>USA<br/>Non-industry funded</p> | <p>RCT<br/>Pediatric hospital</p> | <p>RSV (bronchiolitis)<br/>&lt;24mo</p> | <p>1) Dexamethasone 0.5mg/kg/dose every 12h for 4d (IV), n=22<br/>2) Placebo saline every 12h for 4d (IV), n=19</p> | <p>Other treatment (not specified)<br/>No CS in preceding 3wk</p> | <p>Enrolment &amp; daily until discharge; FU 30d after enrolment</p> | <p>Serious adverse events occurred in 2 patients in the dexamethasone group. One infant developed progressive respiratory failure that did not improve with high-frequency oscillatory ventilation or extracorporeal membrane oxygenation; support was withdrawn, and this infant died on study day 38. Another subject developed pneumothorax, which resolved following placement of a pigtail thoracotomy catheter, on study day 7. Neither adverse event was judged to be related to administration of the study</p> |
|--------------------------------------------------------|-----------------------------------|-----------------------------------------|---------------------------------------------------------------------------------------------------------------------|-------------------------------------------------------------------|----------------------------------------------------------------------|-------------------------------------------------------------------------------------------------------------------------------------------------------------------------------------------------------------------------------------------------------------------------------------------------------------------------------------------------------------------------------------------------------------------------------------------------------------------------------------------------------------------------|

|                                                     |                              |                          |                                                                                                                                                                                                                                                                                      |                                                                                 |                                  |                                                                                                                                                                                                        |
|-----------------------------------------------------|------------------------------|--------------------------|--------------------------------------------------------------------------------------------------------------------------------------------------------------------------------------------------------------------------------------------------------------------------------------|---------------------------------------------------------------------------------|----------------------------------|--------------------------------------------------------------------------------------------------------------------------------------------------------------------------------------------------------|
|                                                     |                              |                          |                                                                                                                                                                                                                                                                                      |                                                                                 |                                  | drug. No patients in either group had microscopic or gross gastrointestinal bleeding, and no patients required antihypertensive therapy during the study.                                              |
| Bulow 1999 Denmark Non-industry funded              | RCT Pediatric hospital 3     | RSV (bronchiolitis) 0-2y | 1) Prednisolone 5.0mg/ml at dose of 2mg/kg/day, first dose at enrolment and for 4d (oral), or methylprednisolone for patients with IV line (40.0mg/ml at dose of 1.5mg/kg/day) for 5d (IV), n=73<br>2) quinine hydrochloride (or saline for patients with IV line) for 5d (IV), n=74 | Beta-2-agonist, antibiotics, oxygen & hydration<br><br>No CS in preceding month | Enrolment & 5d; FU 1mo & at 1y   | A total of 11 patients (7 in the prednisolone group and 4 in the placebo group) did not complete the treatment because of side effects, primarily vomiting (8 patients), which were mild in all cases. |
| Chang 2008 Australia Non-industry & industry funded | RCT Pediatric & general ED 3 | Asthma 2-15y             | 1) Prednisolone 1.0mg/kg (max. 50.0mg/day) for 3d + placebo solution for 2d (oral), n=101<br>2) Prednisolone 1.0mg/kg (max.                                                                                                                                                          | NR<br><br>No maintenance CS or CS preceding presentation                        | 24h, 48h, D5, D7, D10, D14 & D28 | There were five recorded adverse events, with no significant difference between groups. In the 3-day group,                                                                                            |

|                                              |                                                                           |                 |                                                                                                                                                                                                                                                |                                                                       |                                                     |                                                                                                                                                                                                        |
|----------------------------------------------|---------------------------------------------------------------------------|-----------------|------------------------------------------------------------------------------------------------------------------------------------------------------------------------------------------------------------------------------------------------|-----------------------------------------------------------------------|-----------------------------------------------------|--------------------------------------------------------------------------------------------------------------------------------------------------------------------------------------------------------|
|                                              |                                                                           |                 | 50.0mg/day) for 5d (oral), n=100                                                                                                                                                                                                               |                                                                       |                                                     | two parents reported that their child had behavioural disturbance (cranky and irritable) and one had a rash, while two children in the 5-day group had behavioural disturbance (angry and aggressive). |
| Chen 2008<br>China<br>Funding NR             | RCT, 3-arm<br>Pediatric<br>outpatient,<br>hospital<br>ward,<br>or ED<br>1 | Asthma<br>1-14y | 1) Budesonide 0.5mg (neb) + sal + ipratropium; 1-6yo (n=32); 6-14yo (n=21)<br>2) Budesonide 0.2-0.4mg (neb) + sal + ipratropium; 1-6yo (n=25); 6-14yo (n=16)<br>3) Dexamethasone 2.0mg (<2yo), 4.0mg (2-6yo) (IV); 1-6yo (n=15); 6-14yo (n=14) | NR<br><br>No CS within 48h                                            | 0.5h before & post-treatment & 5d post-treatment    | All three groups of children showed no adverse effects.                                                                                                                                                |
| Chub-Appakarn 2007<br>Thailand<br>Funding NR | RCT<br>Pediatric<br>hospital<br>ward<br>1                                 | Croup<br>6mo-5y | 1) Dexamethasone 0.5ml/kg of 0.15 mg/kg, single dose (IV), n=20<br>2) Dexamethasone 0.5 ml/kg of                                                                                                                                               | Epinephrine, mist, antibiotics & oxygen<br><br>No CS in preceding 2wk | 0, 1h, 2h, 3h, 4h, 6h, 8h, 10h & 12h post-treatment | There was no significant adverse reaction from dexamethasone treatment in either group.                                                                                                                |

|                                                    |                                     |             |                                                                                                                |                                                                                    |                                                                                                          |                                                                                                                                                                                                                                                                                                                                                                                                                                                                             |
|----------------------------------------------------|-------------------------------------|-------------|----------------------------------------------------------------------------------------------------------------|------------------------------------------------------------------------------------|----------------------------------------------------------------------------------------------------------|-----------------------------------------------------------------------------------------------------------------------------------------------------------------------------------------------------------------------------------------------------------------------------------------------------------------------------------------------------------------------------------------------------------------------------------------------------------------------------|
|                                                    |                                     |             | 0.6mg/kg, single dose (IV), n=21                                                                               |                                                                                    |                                                                                                          |                                                                                                                                                                                                                                                                                                                                                                                                                                                                             |
| Clavenna 2014 Italy Non-industry & industry funded | RCT Family pediatric health units 9 | Wheeze 1-5y | 1) Beclomethasone 400mcg (1ml) twice daily for 10d (neb), n=264<br>2) Placebo twice daily for 10d (neb), n=261 | Paracetamol, nasal saline irrigation & antibiotics<br><br>No CS in preceding month | Entry visit, D11 (or prior if requested by parents) & daily diary symptom recording during 10d treatment | No differences were found in the incidence of adverse events reported by parents at the end of the therapy. Table 4 AEs reported by parents, n (becl vs. placebo): Any AEs (97 vs. 98) Hoarseness (34 vs. 34); Diarrhea (27 vs. 35); Skin rash (19 vs. 22); Vomiting (19 vs. 20); Candidiasis (12 vs. 15); Others (25 vs. 26) Two serious adverse events were reported by pediatricians: 1 hospital admission for urinary tract infection in the beclomethasone group and 1 |

|                                     |                           |              |                                                                                                                                                                                                                                                                                                                                                                      |                              |                                                          |                                                                                                                                                                                                                                                                                                                                                                    |
|-------------------------------------|---------------------------|--------------|----------------------------------------------------------------------------------------------------------------------------------------------------------------------------------------------------------------------------------------------------------------------------------------------------------------------------------------------------------------------|------------------------------|----------------------------------------------------------|--------------------------------------------------------------------------------------------------------------------------------------------------------------------------------------------------------------------------------------------------------------------------------------------------------------------------------------------------------------------|
|                                     |                           |              |                                                                                                                                                                                                                                                                                                                                                                      |                              |                                                          | hospitalization for adenoidectomy and tonsillectomy in the placebo group. Neither adverse event was drug related.                                                                                                                                                                                                                                                  |
| Connett 1994 UK Non-industry funded | RCT, factorial Hospital 1 | Asthma >18mo | 1) Prednisolone 2.0mg/kg single dose (oral) + sal 0.15mg/kg every 30min for 3h (max. 5.0mg) (neb), n=18<br>2) Prednisolone 2.0mg/kg single dose (oral) + sal 5.0mg every 1-4h as needed (neb), n=19<br>3) Placebo single dose (oral) + sal 0.15mg/kg every 30min for 3h (neb), n=15<br>4) Placebo single dose (oral) plus sal 5.0mg every 1-4h as needed (neb), n=18 | NR<br>No CS in preceding 2wk | On arrival, after nebulization & at treatment completion | Tremor and hyperactivity were more commonly reported in those children receiving the more intensive nebuliser regimen but symptoms were mild and self-limiting in most instances. Vomiting was more a feature of disease severity than any particular treatment group. There was no significant change in heart and respiratory rates throughout the study period, |

|                                                                    |                      |                              |                                                                                                                                                           |                                                |                                                          |                                                                                                                                                                                                                                                                                  |
|--------------------------------------------------------------------|----------------------|------------------------------|-----------------------------------------------------------------------------------------------------------------------------------------------------------|------------------------------------------------|----------------------------------------------------------|----------------------------------------------------------------------------------------------------------------------------------------------------------------------------------------------------------------------------------------------------------------------------------|
|                                                                    |                      |                              |                                                                                                                                                           |                                                |                                                          | though there was a trend towards decreasing tachypnoea in all four groups.                                                                                                                                                                                                       |
| Connolly<br>1969<br>Ireland<br>Funding NR                          | RCT<br>Hospital<br>1 | RSV<br>Bronchiolitis<br>0-2y | 1) Prednisolone<br>D1=15.0mg;<br>D2-3=10.0mg;<br>D4-5=5.0mg;<br>D6-7=2.5mg<br>(NR, likely IV),<br>n=47<br>2) Placebo (NR,<br>likely IV), n=48             | Ampicillin, oxygen<br><br>NR                   | FU 1mo &<br>1y                                           | There was no evidence in this trial that prednisolone treatment of the patients affected the antibody response. In the dosage used in this trial, prednisolone had no beneficial or harmful effects on the course of the disease in severely ill children. There were no deaths. |
| Corneli<br>2007<br>USA<br>Non-<br>industry &<br>industry<br>funded | RCT<br>ED<br>20      | Bronchiolitis<br>2-12mo      | 1)<br>Dexamethasone<br>1.0mg/kg (max.<br>12mg), single<br>dose (oral),<br>n=305<br>2) Placebo<br>solution<br>1.0ml/kg (max.<br>12ml), NR (oral),<br>n=295 | Not specified<br><br>No CS in preceding<br>14d | Baseline, 1h<br>& 4 h;<br>FU at 7-10d<br>by<br>telephone | There were few adverse events. No infant had gastrointestinal bleeding, hypertension, or complicated varicella. Vomiting within 20 min after administration                                                                                                                      |

|                                         |                            |              |                                                                                                                                        |                                                                                                     |                                                                  |                                                                                                                                                                                                                                                                                                                                   |
|-----------------------------------------|----------------------------|--------------|----------------------------------------------------------------------------------------------------------------------------------------|-----------------------------------------------------------------------------------------------------|------------------------------------------------------------------|-----------------------------------------------------------------------------------------------------------------------------------------------------------------------------------------------------------------------------------------------------------------------------------------------------------------------------------|
|                                         |                            |              |                                                                                                                                        |                                                                                                     |                                                                  | n of study medication (5.5% in dex; 4.7% in placebo). Pneumonia was diagnosed in three infants; two were in the placebo group, and an empyema developed in one of these two infants.                                                                                                                                              |
| Cronin 2016 Ireland Non-industry funded | RCT Tertiary hospital ED 1 | Asthma 2-16y | 1) Dexamethasone 0.3mg/kg (max. 12.0mg) single dose, n=123<br>2) Prednisolone 1.0mg/kg per day, once daily (max. 40.0mg) for 3d, n=122 | Regular inhaled bronchodilators prior to enrolment in trial<br><br>No IV or oral CS in previous 4wk | Baseline & D4 for primary outcome; 14d period for adverse events | Seven patients in the PRED group (5.7%) vomited within 30 minutes of the dose of steroid on day 1 in the ED compared with none in the DEX group (absolute difference - 5.7%; 95%CI - 9.9% to - 1.54%). Seven patients vomited after the prednisolone dose on day 2, and 6 vomited after the dose on day 3. A total of 14 patients |

|                                               |                          |                                                                    |                                                                                                                                                                        |          |                                                                                      |                                                                                                                                                                                                                                                                                                                                                                                  |
|-----------------------------------------------|--------------------------|--------------------------------------------------------------------|------------------------------------------------------------------------------------------------------------------------------------------------------------------------|----------|--------------------------------------------------------------------------------------|----------------------------------------------------------------------------------------------------------------------------------------------------------------------------------------------------------------------------------------------------------------------------------------------------------------------------------------------------------------------------------|
|                                               |                          |                                                                    |                                                                                                                                                                        |          |                                                                                      | vomited after at least 1 dose of prednisolone. No other adverse events attributable to the study medications were noted.                                                                                                                                                                                                                                                         |
| Csonka 2003<br>Finland<br>Non-industry funded | RCT<br>Pediatric ED<br>1 | Viral respiratory infection-induced lower airway disease<br>6-35mo | 1) Prednisolone 2.0mg/kg in ED followed by 2.0mg/kg/day for 3d (oral), n=113<br>2) Placebo 10.0mL fructose in water (in ED) followed by subsequent doses for 3d, n=117 | NR<br>NR | Diary recordings twice daily for 14d; examination by physician 14d-21d post-ED visit | Fifteen children (4 in the placebo group and 11 in the prednisolone group) discontinued the study medication because of perceived side effects. The reported reactions were mild and resolved without special interventions. These included vomiting (4 vs 9), diarrhea (6 vs 6), rash (0 vs 2), and restlessness (2 vs 3) in the placebo and prednisolone groups, respectively. |



|                                                                                                                                                                                                                                                             |                                                                          |                                                        |                                           |                                                                                                                                                                                                                                                                                                                                                                                                                                                                                                                                                                                                                             |                                    |                                       |                                                                                                                                                                                                                                                           |
|-------------------------------------------------------------------------------------------------------------------------------------------------------------------------------------------------------------------------------------------------------------|--------------------------------------------------------------------------|--------------------------------------------------------|-------------------------------------------|-----------------------------------------------------------------------------------------------------------------------------------------------------------------------------------------------------------------------------------------------------------------------------------------------------------------------------------------------------------------------------------------------------------------------------------------------------------------------------------------------------------------------------------------------------------------------------------------------------------------------------|------------------------------------|---------------------------------------|-----------------------------------------------------------------------------------------------------------------------------------------------------------------------------------------------------------------------------------------------------------|
| 1<br>2<br>3<br>4<br>5<br>6<br>7<br>8<br>9<br>10<br>11<br>12<br>13<br>14<br>15<br>16<br>17<br>18<br>19<br>20<br>21<br>22<br>23<br>24<br>25<br>26<br>27<br>28<br>29<br>30<br>31<br>32<br>33<br>34<br>35<br>36<br>37<br>38<br>39<br>40<br>41<br>42<br>43<br>44 | Daugbjerg<br>1993<br>Denmark<br>Non-<br>industry &<br>industry<br>funded | RCT, 4-<br>arm<br>Pediatri<br>c<br>depart<br>ment<br>5 | First or<br>recurrent<br>wheeze<br>0-18mo | 1) Prednisolone<br>4.0-6.0mg/kg on<br>admission; D2-<br>3=1.6-2.6mg/kg<br>(oral) +<br>terbutaline<br>0.12-0.2mg/kg<br>(4ml) every 4h<br>until discharge<br>or for 5d (neb),<br>n=31<br>2) Placebo<br>solution (oral) +<br>budesonide<br>0.5mg every 4h<br>until discharge<br>or for 5d (neb) +<br>terbutaline<br>0.12-0.2mg/kg<br>(4ml) every 4h<br>until discharge<br>or for 5d, n=29<br>3) Placebo<br>solution (oral) +<br>placebo (neb) +<br>terbutaline<br>0.12-0.2mg/kg<br>every 4h until<br>discharge or for<br>5d (neb), n=27<br>4) Placebo<br>solution (oral) +<br>placebo (neb) +<br>placebo saline<br>(neb), n=27 | NR<br><br>No CS preceding<br>study | Daily for 5d<br>or until<br>discharge | No side<br>effects were<br>observed,<br>specifically no<br>hoarseness,<br>oral<br>candidiasis or<br>continued<br>fever, in any<br>of the groups.<br>No significant<br>tachycardia<br>was found in<br>the treatment<br>groups<br>compared<br>with placebo. |
| 45<br>46<br>47<br>48<br>49<br>50<br>51<br>52<br>53<br>54<br>55<br>56<br>57<br>58<br>59<br>60                                                                                                                                                                | Dawson<br>1993<br>Australia<br>Industry<br>funded                        | RCT<br>Hospita<br>l<br>1                               | Asthma<br><6.5y                           | 1) Prednisolone<br>1.0mg/kg<br>tablets, every<br>24h for 5d<br>(oral), n=25<br>2) Prednisolone<br>1.0mg/kg<br>solution, every                                                                                                                                                                                                                                                                                                                                                                                                                                                                                               | None<br><br>NR                     | D1 to D5                              | Twenty-one<br>of the<br>children<br>taking the<br>solution took<br>it easily on<br>day 3,<br>compared to<br>two in the                                                                                                                                    |

1  
2  
3  
4  
5  
6  
7  
8  
9  
10  
11  
12  
13  
14  
15  
16  
17  
18  
19  
20  
21  
22  
23  
24  
25  
26  
27  
28  
29  
30  
31  
32  
33  
34  
35  
36  
37  
38  
39  
40  
41  
42  
43  
44  
45  
46  
47  
48  
49  
50  
51  
52  
53  
54  
55  
56  
57  
58  
59  
60

|  |  |  |                            |  |  |                                                                                                                                                                                                                                                                                                                                                                                                                                                                                                                                                |
|--|--|--|----------------------------|--|--|------------------------------------------------------------------------------------------------------------------------------------------------------------------------------------------------------------------------------------------------------------------------------------------------------------------------------------------------------------------------------------------------------------------------------------------------------------------------------------------------------------------------------------------------|
|  |  |  | 24h for 5d<br>(oral), n=26 |  |  | tablet group on the same day. A difference was noted on day 1 with regard to mood change but there was no significant difference at any stage between the groups in terms of excitability. The only children who appeared to be nauseated on day 1 were eight children receiving the tablet treatment. Thereafter, only one child in the tablet group experienced severe nausea although the incidence of mild nausea was evenly distributed. We could not demonstrate any statistical difference between the two treatments in terms of their |
|--|--|--|----------------------------|--|--|------------------------------------------------------------------------------------------------------------------------------------------------------------------------------------------------------------------------------------------------------------------------------------------------------------------------------------------------------------------------------------------------------------------------------------------------------------------------------------------------------------------------------------------------|

For peer review only

|                                                           |                      |                                                     |                                                                                                                                                                                                                                                                             |                                                                                                                   |                                                                                                                                                                               |                                                                                                                                                                                                                                                        |
|-----------------------------------------------------------|----------------------|-----------------------------------------------------|-----------------------------------------------------------------------------------------------------------------------------------------------------------------------------------------------------------------------------------------------------------------------------|-------------------------------------------------------------------------------------------------------------------|-------------------------------------------------------------------------------------------------------------------------------------------------------------------------------|--------------------------------------------------------------------------------------------------------------------------------------------------------------------------------------------------------------------------------------------------------|
|                                                           |                      |                                                     |                                                                                                                                                                                                                                                                             |                                                                                                                   |                                                                                                                                                                               | propensity to cause vomiting (on all five days), abdominal pain frequency (days 2-5), nausea (days 2-5) or mood change (days 2-5). As a result of persistent vomiting, the parents of two children receiving tablets stopped treatment prematurely.    |
| Ducharme 2009<br>Canada<br>Non-industry & industry funded | RCT<br>Hospital<br>5 | >=3 wheeze episodes in lifetime, onset of URTI 1-6y | 1) Fluticasone propionate 250mcg (3 doses twice daily at start of URTI) until 48h elapsed without symptoms, for max. 10d (MDI), n=62<br>2) Placebo (3 doses twice daily at start of URTI until 48h elapsed without symptoms (MDI), n=67<br><br>Multiple courses over 6-12mo | Albuterol, nasal saline irrigation<br><br>No more than 1 dose of CS in preceding 6mo or 2 doses in preceding 12mo | Monthly telephone contacts and a medical visit every 4mo;<br><br>Growth assessed using an upright stadiometer at baseline, every month, and at the end of follow-up (6-12mo); | Thirteen serious adverse events (4 in fluticasone group and 9 in placebo) occurred in 13 children during the study period - namely, pneumonia, seizure, admission to an intensive care unit, burn, respiratory syncytial virus infection, atelectasis, |

1  
2  
3  
4  
5  
6  
7  
8  
9  
10  
11  
12  
13  
14  
15  
16  
17  
18  
19  
20  
21  
22  
23  
24  
25  
26  
27  
28  
29  
30  
31  
32  
33  
34  
35  
36  
37  
38  
39  
40  
41  
42  
43  
44  
45  
46  
47  
48  
49  
50  
51  
52  
53  
54  
55  
56  
57  
58  
59  
60

|  |  |  |  |  |                                                                                                                                     |                                                                                                                                                                                                                                                                                                                                                                                                                                                                                                                          |
|--|--|--|--|--|-------------------------------------------------------------------------------------------------------------------------------------|--------------------------------------------------------------------------------------------------------------------------------------------------------------------------------------------------------------------------------------------------------------------------------------------------------------------------------------------------------------------------------------------------------------------------------------------------------------------------------------------------------------------------|
|  |  |  |  |  | Basal cortisol assessed using an immunoassay system, with or without corticotropin testing, at baseline and end of the study (12mo) | and Kawasaki's disease. None of the serious adverse events were considered by an independent physician masked to treatment to be attributable to the study drug.<br>Table E3 adverse health events, n (FP vs. placebo):<br>Otitis media (27 vs. 23);<br>Fever (18 vs. 20);<br>Gastroenteritis (14 vs. 11);<br>Pneumonia (13 vs. 10);<br>Sinusitis (10 vs. 9);<br>Injuries (5 vs. 9);<br>Chickenpox (9 vs. 6);<br>Croup (5 vs. 4);<br>Vomiting (4 vs. 4);<br>Pharyngitis (6 vs. 4);<br>Streptococcal infection (2 vs. 4); |
|--|--|--|--|--|-------------------------------------------------------------------------------------------------------------------------------------|--------------------------------------------------------------------------------------------------------------------------------------------------------------------------------------------------------------------------------------------------------------------------------------------------------------------------------------------------------------------------------------------------------------------------------------------------------------------------------------------------------------------------|

1  
2  
3  
4  
5  
6  
7  
8  
9  
10  
11  
12  
13  
14  
15  
16  
17  
18  
19  
20  
21  
22  
23  
24  
25  
26  
27  
28  
29  
30  
31  
32  
33  
34  
35  
36  
37  
38  
39  
40  
41  
42  
43  
44  
45  
46  
47  
48  
49  
50  
51  
52  
53  
54  
55  
56  
57  
58  
59  
60

|  |  |  |  |  |  |                                                                                                                                                                                                                                                                                                                                                                                                                                                                                                                                              |
|--|--|--|--|--|--|----------------------------------------------------------------------------------------------------------------------------------------------------------------------------------------------------------------------------------------------------------------------------------------------------------------------------------------------------------------------------------------------------------------------------------------------------------------------------------------------------------------------------------------------|
|  |  |  |  |  |  | <p>Conjunctivitis (2 vs. 3);<br/>Eczema (6 vs. 1);<br/>Rash (5 vs. 2);<br/>Serous otitis media (4 vs. 2)<br/>Author reports harms separately from adverse health events: harm defined as failure to thrive, defined by a weight below the 3rd percentile at the end of the study period or a decrease in weight by at least 2 major percentile lines on the Centers for Diseases Control and Prevention growth charts. The gain in height and weight was significantly lower in children treated with fluticasone than in children given</p> |
|--|--|--|--|--|--|----------------------------------------------------------------------------------------------------------------------------------------------------------------------------------------------------------------------------------------------------------------------------------------------------------------------------------------------------------------------------------------------------------------------------------------------------------------------------------------------------------------------------------------------|

For peer review only

1  
2  
3  
4  
5  
6  
7  
8  
9  
10  
11  
12  
13  
14  
15  
16  
17  
18  
19  
20  
21  
22  
23  
24  
25  
26  
27  
28  
29  
30  
31  
32  
33  
34  
35  
36  
37  
38  
39  
40  
41  
42  
43  
44  
45  
46  
47  
48  
49  
50  
51  
52  
53  
54  
55  
56  
57  
58  
59  
60

|                                                 |                                                    |                         |                                                                                       |                                                   |                                                                                       |                                                                                                                                                                                                                                                                                                                                                                                                                                                                             |
|-------------------------------------------------|----------------------------------------------------|-------------------------|---------------------------------------------------------------------------------------|---------------------------------------------------|---------------------------------------------------------------------------------------|-----------------------------------------------------------------------------------------------------------------------------------------------------------------------------------------------------------------------------------------------------------------------------------------------------------------------------------------------------------------------------------------------------------------------------------------------------------------------------|
|                                                 |                                                    |                         |                                                                                       |                                                   |                                                                                       | <p>placebo, with a difference between the groups of 5 percentage points. Two children in the fluticasone group and 1 in the placebo group met the definition of failure to thrive; the number needed to harm was not significant. There were no significant group differences in the change in lumbar bone mineral density, bone mineral content, or bone age; low values for these and cortisol were normal when repeated or when corticotropin testing was performed.</p> |
| <p>Eboriadou 2010<br/>Greece<br/>Funding NR</p> | <p>RCT, 3-<br/>arm<br/>Pediatri<br/>c ED<br/>1</p> | <p>Croup<br/>6mo-5y</p> | <p>1) L-epinephrine<br/>5.0ml (1 of<br/>1:1000mg/ml),<br/>5-10min (neb),<br/>n=25</p> | <p>Oxygen<br/><br/>No CS in preceding<br/>24h</p> | <p>Before<br/>treatment<br/>&amp; at 15min,<br/>20min,<br/>60min,<br/>90min &amp;</p> | <p>The L-<br/>epinephrine<br/>group was the<br/>only group<br/>with side<br/>effects of</p>                                                                                                                                                                                                                                                                                                                                                                                 |

|                                                            |                            |                   |                                                                                                                                                                                                                                    |                                                                 |                                                                                              |                                                                                                                                                                                                                            |
|------------------------------------------------------------|----------------------------|-------------------|------------------------------------------------------------------------------------------------------------------------------------------------------------------------------------------------------------------------------------|-----------------------------------------------------------------|----------------------------------------------------------------------------------------------|----------------------------------------------------------------------------------------------------------------------------------------------------------------------------------------------------------------------------|
|                                                            |                            |                   | 2)<br>Dexamethasone<br>0.6mg/kg (max.<br>8mg), single<br>dose (IM), n=19<br>3)<br>Beclomethason<br>e dipropionate<br>200mcg (MDI),<br>n=20                                                                                         |                                                                 | 120min<br>post-<br>treatment;<br>patients<br>asked to<br>return if<br>relapse in<br>next 24h | treatment.<br>Tremor and<br>tachycardia<br>were<br>observed in 4<br>children from<br>Group A, who<br>had received<br>LE and were<br>resolved after<br>2 hours, when<br>the action of<br>LE wear off.                       |
| Eden 1967<br>USA<br>Industry<br>funded                     | RCT<br>Hospital<br>1       | Croup<br>8mo-5y   | 1)<br>Dexamethasone<br>0.10mg/kg at<br>0.1cc/kg/dose<br>every 6h for<br>48h, total daily<br>0.40mg (IM),<br>n=25<br>2) Control<br>preparation<br>0.1cc/kg/dose<br>every 6h for 48h<br>(IM), n=25                                   | Oxygen, humidity &<br>tetracycline<br><br>NR                    | Every 6h for<br>total 48h                                                                    | No untoward<br>effects were<br>noted. There<br>were no<br>episodes of<br>congestive<br>heart failure<br>or sodium<br>retention.                                                                                            |
| Escobedo<br>Chavez<br>1992<br>Mexico<br>Industry<br>funded | RCT<br>Hospital<br>ED<br>1 | Asthma<br>1mo-14y | 1)<br>Methylprednisol<br>one 3.0mg/kg,<br>single dose (IM)<br>+ placebo 4.5ml<br>+ sal 0.5ml<br>every 4h (neb),<br>n=25<br>2)<br>Aminophylline<br>5.0mg/kg every<br>6h (IV) + sal 70<br>mcg/kg every 8h<br>+ oxygen (neb),<br>n=25 | Saline, salbutamol<br>& oxygen<br><br>No CS in preceding<br>15d | Baseline &<br>discharge                                                                      | We detected<br>no side<br>effects with<br>the use of<br>methylprednis<br>olone in a<br>single dose or<br>any treatment<br>failures that<br>merited the<br>use of<br>methylxanthin<br>es or<br>additional<br>steroid doses. |
| Fifoot 2007<br>Australia                                   | RCT, 3-<br>arm             | Croup<br>6mo-6y   | 1) Prednisolone<br>0.2ml/kg of<br>1.0mg/kg, single                                                                                                                                                                                 | Antipyretics or<br>nebulized<br>adrenaline                      | Baseline &<br>hourly up                                                                      | No patient<br>suffered any<br>adverse                                                                                                                                                                                      |

|                                                                                                                                                                                                                |                                                    |                          |                 |                                                                                                                                                                                           |                                                                                           |                                                                                       |                                                                                                                                                                                                                                                                                                                                                 |
|----------------------------------------------------------------------------------------------------------------------------------------------------------------------------------------------------------------|----------------------------------------------------|--------------------------|-----------------|-------------------------------------------------------------------------------------------------------------------------------------------------------------------------------------------|-------------------------------------------------------------------------------------------|---------------------------------------------------------------------------------------|-------------------------------------------------------------------------------------------------------------------------------------------------------------------------------------------------------------------------------------------------------------------------------------------------------------------------------------------------|
| 1<br>2<br>3<br>4<br>5<br>6<br>7<br>8<br>9<br>10<br>11<br>12<br>13<br>14<br>15<br>16<br>17<br>18<br>19<br>20<br>21<br>22<br>23<br>24<br>25                                                                      | Non-<br>industry<br>funded                         | Pediatric ED<br>1        |                 | dose (oral),<br>n=34<br>2)<br>Dexamethasone<br>0.2ml/kg of<br>0.15mg/kg,<br>single dose<br>(oral), n=34<br>3)<br>Dexamethasone<br>0.2ml/kg of<br>0.6mg/kg, single<br>dose (oral),<br>n=31 | No CS in preceding<br>wk                                                                  | to 4h post-<br>treatment;<br>FU 1wk by<br>telephone<br>following<br>index visit       | outcomes<br>from receiving<br>study steroid,<br>either at<br>index<br>presentation<br>or during the<br>follow-up<br>period. One<br>patient from<br>each group<br>vomited their<br>first dose of<br>medication,<br>all except one<br>(dex<br>0.6mg/kg)<br>tolerated<br>second dose.                                                              |
| 26<br>27<br>28<br>29<br>30<br>31<br>32<br>33<br>34<br>35<br>36<br>37<br>38<br>39<br>40<br>41<br>42<br>43<br>44<br>45<br>46<br>47<br>48<br>49<br>50<br>51<br>52<br>53<br>54<br>55<br>56<br>57<br>58<br>59<br>60 | Fitzgerald<br>1996<br>Canada<br>Industry<br>funded | RCT<br>Pediatric ED<br>3 | Croup<br>6mo-6y | 1) Budesonide<br>2.0mg (4ml) for<br>5min (neb),<br>n=35<br>2) Adrenaline<br>4.0mg (4ml) for<br>5min (neb),<br>n=31                                                                        | Additional<br>medications<br>permitted 2h after<br>study<br><br>No CS in preceding<br>4wk | Baseline,<br>30min,<br>60min,<br>90min,<br>120min,<br>12h & 24h<br>post-<br>treatment | Six patients in<br>each<br>treatment<br>group<br>reported<br>adverse<br>events. These<br>included<br>vomiting, an<br>erythematous<br>rash,<br>diarrhea,<br>wakefulness,<br>excessively<br>active<br>behavior,<br>wheezing, and<br>a nosebleed.<br>These were<br>minor and did<br>not result in<br>withdrawal<br>from the<br>study or<br>require |



|                                   |                                                |              |                                                                                                                                                           |                                                |          |                                                                                                                                                                                                                                                                                                                                                                                                                                                                                               |
|-----------------------------------|------------------------------------------------|--------------|-----------------------------------------------------------------------------------------------------------------------------------------------------------|------------------------------------------------|----------|-----------------------------------------------------------------------------------------------------------------------------------------------------------------------------------------------------------------------------------------------------------------------------------------------------------------------------------------------------------------------------------------------------------------------------------------------------------------------------------------------|
|                                   |                                                |              |                                                                                                                                                           |                                                |          | specific treatment.                                                                                                                                                                                                                                                                                                                                                                                                                                                                           |
| Francis 1997 Australia Funding NR | RCT (trial registry data) Acute care setting 4 | Asthma ≤48mo | 1) Fluticasone propionate 1.0mg twice daily (neb) + placebo tablets once daily (oral) for 7d, n=37<br>2) Prednisolone (dose NR) daily for 7d (oral), n=19 | NR<br>No CS treatment for >7d in preceding 4wk | D1 to D7 | Most frequent adverse events – on-therapy, n (FP vs. pred):<br>Nausea & vomiting (7 vs. 1);<br>Diarrhoea (3 vs. 0);<br>Normal tooth eruption (2 vs. 1);<br>Ear, nose and throat infections (2 vs. 0);<br>Psychomotor disorders (2 vs. 0);<br>Temperature regulation disturbances (2 vs. 0);<br>Asthma (1 vs. 2);<br>Hoarseness/dysphonia (0 vs. 2);<br>Serious adverse events - on-therapy:<br>Subjects with non-fatal SAEs (2 vs. 0):<br>Ketonuria, glycosuria and hyperglycaemia (1 vs. 0); |

|                                                      |                                        |               |                                                                                                                                                                                                             |                                                                                 |                                                                                                    |                                                                                                                                                                                                                                                                                                                                                                                                                                                                                                                                                                             |
|------------------------------------------------------|----------------------------------------|---------------|-------------------------------------------------------------------------------------------------------------------------------------------------------------------------------------------------------------|---------------------------------------------------------------------------------|----------------------------------------------------------------------------------------------------|-----------------------------------------------------------------------------------------------------------------------------------------------------------------------------------------------------------------------------------------------------------------------------------------------------------------------------------------------------------------------------------------------------------------------------------------------------------------------------------------------------------------------------------------------------------------------------|
|                                                      |                                        |               |                                                                                                                                                                                                             |                                                                                 |                                                                                                    | Subjects with fatal SAEs (0 vs. 0)                                                                                                                                                                                                                                                                                                                                                                                                                                                                                                                                          |
| Garbutt<br>2013<br>USA<br>Non-<br>industry<br>funded | RCT<br>Primary<br>care<br>office<br>10 | Croup<br>1-8y | 1)<br>Dexamethasone<br>0.6mg/kg (max.<br>18mg), single<br>dose, followed<br>by placebo for<br>2d, 2 doses total<br>(oral), n=46<br>2) Prednisolone<br>2.0mg/kg/d<br>(max. 60mg/d)<br>for 3d (oral),<br>n=41 | Acetaminophen &<br>ibuprofen<br><br>No CS preceding<br>current croup<br>episode | FU<br>interviews<br>at D1 to D4<br>& D11;<br>FU chart<br>review<br>within 28d<br>of index<br>visit | No serious<br>adverse<br>events<br>occurred.<br>Study groups<br>did not differ<br>in reporting<br>side effects<br>from the<br>study<br>medications<br>(24%<br>dexamethaso<br>ne, 26%<br>prednisolone,<br>P = 1.0; Table<br>4). The most<br>common side<br>effects<br>identified<br>with specific<br>questioning<br>were mood<br>changes<br>(57%), sleep<br>problems<br>(36%),<br>stomach pain<br>(19%), and<br>headache<br>(13%).<br>Table 4<br>adverse<br>events, n (dex<br>vs. pred):<br>A side effect<br>at D11 (11/45<br>vs. 10/39);<br>Mood<br>changes (25<br>vs. 24); |

|                                    |                                            |                                                   |                                                                                                                                                                                                            |                                                                                           |                               |                                                                                                                                                                                                                      |
|------------------------------------|--------------------------------------------|---------------------------------------------------|------------------------------------------------------------------------------------------------------------------------------------------------------------------------------------------------------------|-------------------------------------------------------------------------------------------|-------------------------------|----------------------------------------------------------------------------------------------------------------------------------------------------------------------------------------------------------------------|
|                                    |                                            |                                                   |                                                                                                                                                                                                            |                                                                                           |                               | New sleep problems (18 vs. 13); Stomach pain (9 vs. 7); Headache (7 vs. 4); Vomiting (3 vs. 7); Nausea (3 vs. 4); Dizziness (3 vs. 2); Tremor (1 vs. 0)                                                              |
| Ghirga 2002<br>Italy<br>Funding NR | NRCT<br>NR,<br>"ambulatory infants"<br>1   | Wheeze - early URTI before signs of wheeze 7-12mo | 1) Beclomethasone 400mcg 3 doses daily for 5d (neb), n=12<br>2) Control (no intervention), n=13<br><br>Multiple courses - 4 treatment periods of 5d (12 infants completed 48 treatment periods in group 1) | NR<br><br>NR                                                                              | Twice daily                   | At this writing, four years after the study was completed, no apparent adverse effects were reported. Plasma cortisol measured in four patients receiving at least 2 treatment periods of 5 days a month was normal. |
| Gill 2017<br>Canada<br>Funding NR  | Cohort<br>Pediatric<br>hospital<br>ED<br>1 | Croup >2y (mean 4.7y vs. 4.8y)                    | 1) Dexamethasone 0.6mg/kg (max 12mg), single dose, n=22<br>2) Controls diagnosed with viral URTI (no dexamethasone)                                                                                        | NR<br><br>No chronic glucocorticoid therapy or any glucocorticoids within 10d of ED visit | AM of admission & D1, D3 & D7 | Single-dose oral dexamethasone 0.6mg/kg for croup is not associated with decreased endogenous glucocorticoid                                                                                                         |

1  
2  
3  
4  
5  
6  
7  
8  
9  
10  
11  
12  
13  
14  
15  
16  
17  
18  
19  
20  
21  
22  
23  
24  
25  
26  
27  
28  
29  
30  
31  
32  
33  
34  
35  
36  
37  
38  
39  
40  
41  
42  
43  
44  
45  
46  
47  
48  
49  
50  
51  
52  
53  
54  
55  
56  
57  
58  
59  
60

|  |  |  |                         |  |  |                                                                                                                                                                                                                                                                                                                                                                                                                                                                                                        |
|--|--|--|-------------------------|--|--|--------------------------------------------------------------------------------------------------------------------------------------------------------------------------------------------------------------------------------------------------------------------------------------------------------------------------------------------------------------------------------------------------------------------------------------------------------------------------------------------------------|
|  |  |  | or antibiotics),<br>n=5 |  |  | levels in children. A 3-year-old previously healthy boy returned to the ED within 24 hours and was given a diagnosis of pneumonia. He was discharged home from the ED with oral antibiotics, and his symptoms resolved by 7 days. The other, also a 3-year-old boy, returned to the ED 4 days after dexamethasone administration for unilateral facial swelling. Serologic testing for paramyxovirus (mumps) was negative, and he was given a diagnosis of viral parotitis. His symptoms resolved by 7 |
|--|--|--|-------------------------|--|--|--------------------------------------------------------------------------------------------------------------------------------------------------------------------------------------------------------------------------------------------------------------------------------------------------------------------------------------------------------------------------------------------------------------------------------------------------------------------------------------------------------|

|                                   |                                                |                            |                                                                                                                        |                  |                                                                                |                                                                                                                                                                                                                                                                                                                                                                                                             |
|-----------------------------------|------------------------------------------------|----------------------------|------------------------------------------------------------------------------------------------------------------------|------------------|--------------------------------------------------------------------------------|-------------------------------------------------------------------------------------------------------------------------------------------------------------------------------------------------------------------------------------------------------------------------------------------------------------------------------------------------------------------------------------------------------------|
|                                   |                                                |                            |                                                                                                                        |                  |                                                                                | <p>days. Four participants visited their primary care physician within 7 days of dexamethasone administration. One patient was healthy, another was given a diagnosis of otitis media and treated with oral antibiotics, and two patients who had persistent coughs were prescribed salbutamol. None of the participants were admitted to hospital, and there were no serious adverse events or deaths.</p> |
| <p>Goebel 2000 USA Funding NR</p> | <p>RCT Pediatric ED or children's clinic 2</p> | <p>Bronchiolitis ≤23mo</p> | <p>1) Prednisone 2.0mg/kg/day for 5d (oral) + albuterol 0.3mg/kg/day (or 0.15mg/kg/dose (neb)) for 5d (oral), n=24</p> | <p>NR<br/>NR</p> | <p>Clinical scores on D0, D2, D3 &amp; D6; FU when convalescence completed</p> | <p>One patient in the prednisolone group was observed by his caretakers to be "jittery" at times after enrollment.</p>                                                                                                                                                                                                                                                                                      |

|                                    |                                                     |              |                                                                                                                                                 |                                     |    |                                                                                                                                                                                                                                                                                                                                                                             |
|------------------------------------|-----------------------------------------------------|--------------|-------------------------------------------------------------------------------------------------------------------------------------------------|-------------------------------------|----|-----------------------------------------------------------------------------------------------------------------------------------------------------------------------------------------------------------------------------------------------------------------------------------------------------------------------------------------------------------------------------|
|                                    |                                                     |              | 2) Placebo solution (oral) + albuterol 0.3mg/kg/day (or 0.15mg/kg/dose (neb)) for 5d (oral), n=24                                               |                                     |    | This resolved after a decrease in the albuterol dose. No evidence of treatment complications was observed in any of the other patients.                                                                                                                                                                                                                                     |
| Grant 1996 USA Non-industry funded | Cohort Primary care clinic & teaching hospital ED 1 | Asthma 2-14y | 1) Prednisone 2.0mg/kg (max. 60mg/day), single dose intermittent for 6mo (oral), n=86<br>2) Placebo (NR), n=86<br><br>Multiple courses over 1yr | Bronchodilators as needed<br><br>NR | NR | Ninety-four episodes of acute infection occurred in 50 subjects and 222 episodes of symptoms of infection occurred in 62 subjects (table 1 episodes of infection, number of doses, and association between doses and frequency of infection). No difference was observed in the mean number of doses of prednisone received by those with the infection compared with those |

|                                 |                                        |                  |                                                                                                                                               |                                            |                                                                                                                                               |                                                                                                                                                                                                                                                                                                                                                                                    |
|---------------------------------|----------------------------------------|------------------|-----------------------------------------------------------------------------------------------------------------------------------------------|--------------------------------------------|-----------------------------------------------------------------------------------------------------------------------------------------------|------------------------------------------------------------------------------------------------------------------------------------------------------------------------------------------------------------------------------------------------------------------------------------------------------------------------------------------------------------------------------------|
|                                 |                                        |                  |                                                                                                                                               |                                            |                                                                                                                                               | without the infection. No correlation was observed between the number of doses of prednisone received and the number of episodes of each infection. This included all episodes of otitis media, streptococcal pharyngitis, pneumonia, and urinary tract infection; eight (73%) episodes of chickenpox; eight (57%) episodes of skin infections; and 14 (88%) episodes of ringworm. |
| Gries 2000<br>USA<br>Funding NR | RCT<br>Tertiary<br>care<br>center<br>1 | Asthma<br>6mo-7y | 1)<br>Dexamethasone<br>1.7mg/kg/dose<br>single dose, (IV),<br>n=15<br>2) Prednisolone<br>2.2mg/kg/dose,<br>twice daily for<br>5d (oral), n=17 | Albuterol<br><br>No CS in preceding<br>2wk | D3, D5, D7,<br>D14 & D28;<br><br>Urinary<br>cortisol/cre<br>atinine<br>assessed by<br>radioimmu<br>noassay<br>(standard<br>methods)<br>on D14 | Ten of the 17<br>children who<br>received PO<br>Pred took the<br>prednisone<br>without much<br>difficulty.<br>However, 3<br>children<br>missed more<br>than 75% of<br>their doses                                                                                                                                                                                                  |

1  
2  
3  
4  
5  
6  
7  
8  
9  
10  
11  
12  
13  
14  
15  
16  
17  
18  
19  
20  
21  
22  
23  
24  
25  
26  
27  
28  
29  
30  
31  
32  
33  
34  
35  
36  
37  
38  
39  
40  
41  
42  
43  
44  
45  
46  
47  
48  
49  
50  
51  
52  
53  
54  
55  
56  
57  
58  
59  
60

|  |  |  |  |  |  |                                                                                                                                                                                                                                                                                                                                                                                                                                                                                                                    |
|--|--|--|--|--|--|--------------------------------------------------------------------------------------------------------------------------------------------------------------------------------------------------------------------------------------------------------------------------------------------------------------------------------------------------------------------------------------------------------------------------------------------------------------------------------------------------------------------|
|  |  |  |  |  |  | because of refusal to take their medicine, and another 4 missed approximately one third of the doses despite force and coaxing by their parents. There were no complications from the IM injections including no cases of persistent swelling, bruising, soreness, or atrophy at the injection site. Patients with any personality changes within the first 5 days (%): IM dex - 10/14 (71); oral pred - 14/16 (87). The median urinary cortisol/creatinine value for the IM Dex group was lower than that for the |
|--|--|--|--|--|--|--------------------------------------------------------------------------------------------------------------------------------------------------------------------------------------------------------------------------------------------------------------------------------------------------------------------------------------------------------------------------------------------------------------------------------------------------------------------------------------------------------------------|

For peer review only



|                                                  |                                   |                                           |                                                                                                                                                                                                                                                                                                                                                                                             |                                             |                                                                                                                                                                                                                                                                                                                                                              |                                                                                                                                                                                                                                                                                                                                                                                                                                                  |
|--------------------------------------------------|-----------------------------------|-------------------------------------------|---------------------------------------------------------------------------------------------------------------------------------------------------------------------------------------------------------------------------------------------------------------------------------------------------------------------------------------------------------------------------------------------|---------------------------------------------|--------------------------------------------------------------------------------------------------------------------------------------------------------------------------------------------------------------------------------------------------------------------------------------------------------------------------------------------------------------|--------------------------------------------------------------------------------------------------------------------------------------------------------------------------------------------------------------------------------------------------------------------------------------------------------------------------------------------------------------------------------------------------------------------------------------------------|
|                                                  |                                   |                                           |                                                                                                                                                                                                                                                                                                                                                                                             |                                             |                                                                                                                                                                                                                                                                                                                                                              | PO Pred group, but this difference was not statistically significant.                                                                                                                                                                                                                                                                                                                                                                            |
| Hedlin 1999 <sup>1</sup><br>Sweden<br>Funding NR | RCT<br>Pediatric<br>hospital<br>1 | Asthma –<br>first sign of<br>URTI<br>1-3y | 1) Budesonide 400mcg, 4 times daily for 3d then twice daily for 7d (MDI), n=9<br>2) Placebo, 4 times daily for 3 days then twice daily for 7d (MDI), n=11<br><br>Multiple courses over 1yr, or max. 6 treatments<br><br>*subgroup of children from Svedmyr 1999 with therapeutic failure from budesonide given 3d course (6.0mg, 4.0mg, and 2.0mg on respective days) of oral betamethasone | Beta-agonists and/or theophylline<br><br>NR | D10 & D13;<br><br>Routine height measurements (assessment method NR) were taken (timing of assessments NR);<br><br>Serum cortisol (on D8-10 of second course of study medication, morning of day after third dose, and at 12-14d after therapy) and urinary cortisol/creatinine (in the night after third dose of betamethasone and at 12-14d after therapy) | There were no significant differences between pretreatment and post-treatment serum cortisol, osteocalcin, ICTP and urine cortisol/creatinine ratio in the groups, (the comparison was made in the children who had assessments before and after budesonide/placebo) nor were there any significant differences between the active and placebo treated groups. It was, however, noteworthy that the urine cortisol/creatinine ratio decreased in |

1  
2  
3  
4  
5  
6  
7  
8  
9  
10  
11  
12  
13  
14  
15  
16  
17  
18  
19  
20  
21  
22  
23  
24  
25  
26  
27  
28  
29  
30  
31  
32  
33  
34  
35  
36  
37  
38  
39  
40  
41  
42  
43  
44  
45  
46  
47  
48  
49  
50  
51  
52  
53  
54  
55  
56  
57  
58  
59  
60

|                                     |                                   |                   |                                                                                                               |                                          |                              |                                                                                                                                                                                                                                                                                                                                                                                                  |
|-------------------------------------|-----------------------------------|-------------------|---------------------------------------------------------------------------------------------------------------|------------------------------------------|------------------------------|--------------------------------------------------------------------------------------------------------------------------------------------------------------------------------------------------------------------------------------------------------------------------------------------------------------------------------------------------------------------------------------------------|
|                                     |                                   |                   |                                                                                                               |                                          | assessed by radioimmunoassay | 5/6 children studied in the active group and in 4/10 in the placebo group. Neither this change nor the difference was statistically significant. PIIINP decreased after both budesonide and placebo treatment periods ( $p < 0.05$ ). Short courses of oral betamethasone have pronounced systemic effects, whereas 10d of high doses of budesonide do not produce significant systemic effects. |
| Husby 1993<br>Denmark<br>Funding NR | RCT<br>Pediatric<br>hospital<br>1 | Croup<br>3mo-4.9y | 1) Budesonide 1000mcg (2ml 500mcg/ml), two doses 30min apart (neb), n=20<br>2) Placebo saline 0.9% (2ml), two | Antibiotics<br><br>No CS preceding study | Baseline & 2h post-treatment | No side effects were reported.                                                                                                                                                                                                                                                                                                                                                                   |

|                            |                         |                  |                                                                                                               |                                                                                                               |    |                                                                                                                                                                                                                                                                                                                                                                                                                                                     |
|----------------------------|-------------------------|------------------|---------------------------------------------------------------------------------------------------------------|---------------------------------------------------------------------------------------------------------------|----|-----------------------------------------------------------------------------------------------------------------------------------------------------------------------------------------------------------------------------------------------------------------------------------------------------------------------------------------------------------------------------------------------------------------------------------------------------|
|                            |                         |                  | doses 30min apart (neb), n=16                                                                                 |                                                                                                               |    |                                                                                                                                                                                                                                                                                                                                                                                                                                                     |
| Inglis 1993 USA Funding NR | Case report, 2 Hospital | Croup 18mo; 14mo | Case 1) Prednisolone 1.0mg/kg, twice daily for 4d (NR)<br>Case 2) Dexamethasone 0.3mg/kg, 3 doses in 24h (NR) | Case 1: racemic epinephrine, acyclovir sodium<br>Case 2: amoxicillin/clavulanate potassium, cefuroxime sodium | NR | Case 1: Twenty days into illness, airway endoscopy revealed shallow mucosal ulcerations of patient's glottis and subglottis, but a normal appearing tracheobronchial tree. Cultures were positive for HSV-1, Staphylococcus aureus and a-hemolytic streptococcus ;<br>Case 2: On day 11 of illness, airway endoscopy revealed severe subglottic edema and ulceration, purulent tracheal secretions, but normal tracheal mucosa. A tracheal aspirate |

1  
2  
3  
4  
5  
6  
7  
8  
9  
10  
11  
12  
13  
14  
15  
16  
17  
18  
19  
20  
21  
22  
23  
24  
25  
26  
27  
28  
29  
30  
31  
32  
33  
34  
35  
36  
37  
38  
39  
40  
41  
42  
43  
44  
45  
46  
47  
48  
49  
50  
51  
52  
53  
54  
55  
56  
57  
58  
59  
60

|  |  |  |  |  |  |                                                                                                                                                                                                                                                                                                                                                                                                                                                                                       |
|--|--|--|--|--|--|---------------------------------------------------------------------------------------------------------------------------------------------------------------------------------------------------------------------------------------------------------------------------------------------------------------------------------------------------------------------------------------------------------------------------------------------------------------------------------------|
|  |  |  |  |  |  | produced a moderate growth of a-hemolytic streptococci and a few yeast. A swab of the subglottic region showed growth of HSV-1 but no respiratory syncytial virus, influenza A or B, or parainfluenza viruses. The patient required intubation postoperatively and was started on a regimen of nafcillin sodium and dexamethasone sodium phosphate, 1.5mg/kg per day. She was extubated after 48 hours and the dexamethasone therapy was discontinued. Her stridor gradually resolved |
|--|--|--|--|--|--|---------------------------------------------------------------------------------------------------------------------------------------------------------------------------------------------------------------------------------------------------------------------------------------------------------------------------------------------------------------------------------------------------------------------------------------------------------------------------------------|

For peer review only

|                                  |                                                 |              |                                                                                                                                                                                                                                  |          |          |                                                                                                                                                                                                                                                                                                                                                                                                                                  |
|----------------------------------|-------------------------------------------------|--------------|----------------------------------------------------------------------------------------------------------------------------------------------------------------------------------------------------------------------------------|----------|----------|----------------------------------------------------------------------------------------------------------------------------------------------------------------------------------------------------------------------------------------------------------------------------------------------------------------------------------------------------------------------------------------------------------------------------------|
|                                  |                                                 |              |                                                                                                                                                                                                                                  |          |          | spontaneously over the next 7 days without further intervention.                                                                                                                                                                                                                                                                                                                                                                 |
| Jan 2000<br>Taiwan<br>Funding NR | Non-RCT<br>Pediatric<br>hospital<br>clinic<br>1 | Asthma<br>NR | 1) Group A:<br>Methylprednisolone<br>1.0mg/kg/6h<br>(IV) for 1d,<br>n=NR<br>2) Group B:<br>Methylprednisolone<br>1.0mg/kg/6h<br>(IV) for 2d,<br>n=NR<br>3) Group C:<br>Methylprednisolone<br>1.0mg/kg/6h<br>(IV) for 3d,<br>n=NR | NR<br>NR | D1 to D3 | An acute effect of glucocorticoid therapy on the suppression of osteoblasts was biochemically revealed by the finding of reduced serum osteocalcin levels; this suggests that early change in serum osteocalcin may be a useful indicator for patients at high risk of bone loss. Levels of serum osteocalcin progressively declined with increasing duration of GC therapy, with tendency toward a decrease of serum phosphate. |

|                                                                         |                                       |                                                     |                                                                                                                                                                                                  |                                                                                                                  |                                                                                                                                                                             |                                                                                                                                                                                       |
|-------------------------------------------------------------------------|---------------------------------------|-----------------------------------------------------|--------------------------------------------------------------------------------------------------------------------------------------------------------------------------------------------------|------------------------------------------------------------------------------------------------------------------|-----------------------------------------------------------------------------------------------------------------------------------------------------------------------------|---------------------------------------------------------------------------------------------------------------------------------------------------------------------------------------|
|                                                                         |                                       |                                                     |                                                                                                                                                                                                  |                                                                                                                  |                                                                                                                                                                             | However, serum calcium levels remained unchanged before and after therapy. Osteocalcin levels ( $\mu\text{g/L}$ ): Group A - 2.7 +/- 3.; Group B - 2.2 +/- 1.9; Group C - 1.8 +/- 1.5 |
| Jartti 2006<br>Finland<br>Non-<br>industry<br>and<br>industry<br>funded | RCT<br>Pediatri<br>c<br>hospital<br>1 | First or<br>second<br>wheeze<br>episode<br>3mo-35mo | 1) Prednisolone<br>5.0mg tablets,<br>first dose<br>2.0mg/kg then<br>2.0mg/kg/day in<br>3 divided doses<br>for 3d (oral),<br>n=46<br>2) Placebo<br>tablets, in 3<br>divided doses<br>for 3d, n=32 | Albuterol, beta-2-<br>agonists,<br>antibiotics, &<br>racemic<br>epinephrine<br><br>No CS in preceding<br>4 weeks | Study entry<br>& twice<br>daily during<br>hospitalizati<br>on, daily<br>diary notes<br>for 2wk<br>post-<br>discharge;<br>FU visit &<br>phone call<br>2wk post-<br>discharge | The<br>prednisolone<br>treatment<br>was well<br>tolerated. No<br>clinically<br>significant<br>adverse<br>effects<br>occurred.                                                         |
| Jartti 2007<br>Finland<br>Non-<br>industry<br>and<br>industry<br>funded | RCT<br>Pediatri<br>c<br>hospital<br>1 | At least<br>third<br>wheeze<br>3mo-7y               | 1) Prednisolone<br>5.0mg tablets,<br>first dose<br>2.0mg/kg then<br>2.0mg/kg/day in<br>3 divided doses<br>for 3d (oral),<br>n=23<br>2) Placebo for<br>3d, n=35                                   | Salbutamol &<br>antibiotics<br><br>No CS in preceding<br>4wk                                                     | Study entry<br>& twice<br>daily during<br>hospitalizati<br>on, daily<br>diary notes<br>for 2wk<br>post-<br>discharge;<br>FU visit &<br>phone call<br>2wk post-<br>discharge | The<br>prednisolone<br>treatment<br>was well<br>tolerated. No<br>clinically<br>significant<br>adverse<br>effects<br>occurred.                                                         |
| Jartti 2015<br>Finland                                                  | RCT                                   | Wheeze –<br>first acute                             | 1) Prednisolone<br>first dose<br>2.0mg/kg, then                                                                                                                                                  | NR                                                                                                               | 2wk daily<br>diary; FU at<br>2wk, 2mo &                                                                                                                                     | There were<br>no differences<br>in the                                                                                                                                                |

|                                         |                       |                                                    |                                                                                                                                                            |                                                                  |                                                                                   |                                                                                                                                                      |
|-----------------------------------------|-----------------------|----------------------------------------------------|------------------------------------------------------------------------------------------------------------------------------------------------------------|------------------------------------------------------------------|-----------------------------------------------------------------------------------|------------------------------------------------------------------------------------------------------------------------------------------------------|
| Non-industry and industry funded        | University hospital 1 | rhinovirus-induced 3-23mo (mean 13.2mo vs. 12.2mo) | 2mg/kg/d in 2 divided doses for 3d (max. 60.0mg/day), n=34<br>2) Placebo, n=40<br><br>Multiple courses over 1yr                                            | No previous systemic or inhaled CS treatment                     | 12mo post-discharge                                                               | incidence of adverse events between the prednisolone and placebo groups (results not shown). No clinically significant adverse events were reported. |
| Johnson 1996 Canada Non-industry funded | RCT Pediatric ED 1    | Croup mean 15mo vs. 17mo                           | 1) Dexamethasone 10.0mg (4ml) - 10.0mg (<8kg), 15.0mg (8-12kg) or 20.0mg (>12kg), 10min (neb), n=28<br>2) Control, saline (4ml), 10min (neb), n=27         | Humidified oxygen<br><br>No CS in preceding 2wk                  | Baseline, 2h & 4h post-treatment                                                  | Two patients with neutropenia treated with dexamethasone had a clinical course consistent with bacterial tracheitis.                                 |
| Johnson 1998 Canada Industry funded     | RCT Pediatric ED 2    | Croup 3mo-9y                                       | 1) Budesonide 4.0mg for 20min (neb), n=48<br>2) Dexamethasone 0.6mg/kg, single dose (IM), n=47<br>3) Placebo suspension, single dose for 20min (neb), n=49 | Racemic epinephrine & mist therapy<br><br>No CS in preceding 4wk | Study entry & hourly for 5h post-treatment until discharge; FU 72h post-discharge | No child had gastrointestinal bleeding or bacterial tracheitis.                                                                                      |
| Klassen 1994 Canada Non-industry funded | RCT Pediatric ED 1    | Croup 3mo-5y                                       | 1) Budesonide 2.0mg (4ml), single dose (neb), n=27<br>2) Placebo saline 0.9%                                                                               | Racemic epinephrine or dexamethasone, or oxygen tent             | Baseline & hourly for 4h; FU at 1wk                                               | No adverse events were noted in the budesonide group. No patient in that                                                                             |

|                                               |                          |                 |                                                                                                                                                   |                                                                                        |                                                 |                                                                                                                                                                                                                                       |
|-----------------------------------------------|--------------------------|-----------------|---------------------------------------------------------------------------------------------------------------------------------------------------|----------------------------------------------------------------------------------------|-------------------------------------------------|---------------------------------------------------------------------------------------------------------------------------------------------------------------------------------------------------------------------------------------|
|                                               |                          |                 | (4ml), single dose (neb), n=27                                                                                                                    | No CS in preceding 2wk                                                                 |                                                 | group had clinical deterioration, either in the emergency department or after discharge. One patient in the placebo group had a burning sensation on the face.                                                                        |
| Klassen 1996<br>Canada<br>Non-industry funded | RCT<br>Pediatric ED<br>1 | Croup<br>3m-5y  | 1) Dexamethasone 0.6mg/kg (oral) + budesonide 2.0mg (4ml) (neb), n=25<br>2) Dexamethasone 0.6mg/kg (oral) + placebo saline 0.9% (4ml) (neb), n=25 | Racemic epinephrine & croup tent<br><br>No CS in preceding 2 weeks                     | Baseline & hourly for 4h; FU 1wk                | Two patients in the budesonide group and 1 patient in the placebo group vomited their initial doses of dexamethasone within 30min and required readministration of dexamethasone, which was subsequently tolerated in all 3 patients. |
| Klassen 1998<br>Canada<br>Non-industry funded | RCT<br>Pediatric ED<br>2 | Croup<br>3mo-5y | 1) Budesonide 2.0mg (4ml) (neb) + placebo syrup (oral), n=65<br>2) Dexamethasone 0.6mg/kg (oral) + placebo saline 4ml (neb), n=69                 | Epinephrine, supplemental glucocorticoids & mist therapy<br><br>No CS in preceding 2wk | Baseline & hourly for 4h; FU 1wk post-enrolment | All parents were asked about the presence of oral thrush and only 1 parent whose child was in the budesonide group                                                                                                                    |



|                                        |                                                                 |                         |                                                                                                                                                                                                                                                                               |                                     |                                                                                                                                           |                                                                                                                                                                                                                                                                                                                                                                                                                |
|----------------------------------------|-----------------------------------------------------------------|-------------------------|-------------------------------------------------------------------------------------------------------------------------------------------------------------------------------------------------------------------------------------------------------------------------------|-------------------------------------|-------------------------------------------------------------------------------------------------------------------------------------------|----------------------------------------------------------------------------------------------------------------------------------------------------------------------------------------------------------------------------------------------------------------------------------------------------------------------------------------------------------------------------------------------------------------|
|                                        |                                                                 |                         | 3) Budesonide<br>2.0mg (4ml)<br>(neb) +<br>dexamethasone<br>0.6mg/kg (oral),<br>n=64                                                                                                                                                                                          |                                     |                                                                                                                                           | reported this<br>condition at<br>the 1-week<br>follow-up.<br>Parents of 1<br>patient<br>treated with<br>dexamethaso<br>ne reported<br>hives, and<br>parents of 1<br>patient<br>treated with<br>dexamethaso<br>ne reported<br>violent<br>behavior.<br>Parents of 1<br>patient who<br>had received<br>budesonide<br>and<br>dexamethaso<br>ne reported<br>their child to<br>be more<br>hyperactive<br>than usual. |
| Kuyucu<br>2004<br>Turkey<br>Funding NR | RCT<br>Pediatri<br>c<br>outpati<br>ent<br>clinic<br>and ED<br>1 | Bronchiolitis<br>2-21mo | 1) Epinephrine<br>3ml of 1:1000<br>solution for<br>10min (neb) +<br>dexamethasone<br>0.6mg/kg, single<br>dose (IM), n=23<br>2) Sal<br>0.15mg/kg of<br>1mg/ml solution<br>added to 0.9%<br>saline for 10min<br>(neb) +<br>dexamethasone<br>0.6mg/kg, single<br>dose (IM), n=23 | NR<br><br>No CS in preceding<br>2wk | Baseline,<br>30min,<br>60min,<br>90min &<br>120min,<br>then 24h,<br>5d;<br>FU by<br>regular<br>hospital<br>visits in<br>subsequent<br>2mo | No side-<br>effects such<br>as pallor,<br>vomiting or<br>tremor were<br>encountered<br>in the<br>patients.                                                                                                                                                                                                                                                                                                     |

|                                 |                                                     |                |                                                                                                                                                                                                                                       |                                                                                |                                                                                                                                                                                                                                               |                                                                                                                                                                                                                                                                                                                                  |
|---------------------------------|-----------------------------------------------------|----------------|---------------------------------------------------------------------------------------------------------------------------------------------------------------------------------------------------------------------------------------|--------------------------------------------------------------------------------|-----------------------------------------------------------------------------------------------------------------------------------------------------------------------------------------------------------------------------------------------|----------------------------------------------------------------------------------------------------------------------------------------------------------------------------------------------------------------------------------------------------------------------------------------------------------------------------------|
|                                 |                                                     |                | <p>3) Epinephrine<br/>3ml of 1:1000 solution for 10min (neb) + placebo saline, single dose (IM), n=11</p> <p>4) Sal<br/>0.15mg/kg (1mg/ml solution added to 0.9% saline) for 10min (neb) + placebo saline, single dose (IM), n=12</p> |                                                                                |                                                                                                                                                                                                                                               |                                                                                                                                                                                                                                                                                                                                  |
| Lai 2005<br>China<br>Funding NR | RCT<br>Hospital<br>pediatric<br>inpatient ward<br>1 | Asthma<br>1-5y | <p>1) Budesonide 0.05mg/kg every 12h (neb), n=9</p> <p>2) Dexamethasone 0.1mg/kg every 8h (neb), n=9</p> <p>Multiple courses over 8-19mo</p>                                                                                          | <p>Terbutaline (as needed) 0.25mg/kg every 6h to a max. of 5.0mg</p> <p>NR</p> | <p>On admission, at discharge &amp; at follow-up;</p> <p>Growth (mean height) assessed (assessment method NR) at baseline and approximately 8-19mo after randomization;</p> <p>Adrenal suppression assessed from blood pressure (systolic</p> | <p>The measures of blood pressure (systolic and diastolic), blood glucose and serum potassium revealed no significant changes between admission and discharge in either group of patients (Table 3). Thus, there were no adverse effects in these patients. Table 4 also shows that there were no significant differences in</p> |

|                                  |                |              |                                                                                                                                                                                                                                           |                                                           |                                                                                           |                                                                                                                                                                                                                                                                                                                                                       |
|----------------------------------|----------------|--------------|-------------------------------------------------------------------------------------------------------------------------------------------------------------------------------------------------------------------------------------------|-----------------------------------------------------------|-------------------------------------------------------------------------------------------|-------------------------------------------------------------------------------------------------------------------------------------------------------------------------------------------------------------------------------------------------------------------------------------------------------------------------------------------------------|
|                                  |                |              |                                                                                                                                                                                                                                           |                                                           | and diastolic) and blood glucose at baseline and approximately 8-19mo after randomization | total height growth, mean rate of height increase, systolic or diastolic blood pressure, or blood glucose between the treatment groups.                                                                                                                                                                                                               |
| Langton Hoyer 1998 UK Funding NR | RCT Hospital 1 | Asthma 1-15y | 1) Prednisolone 0.5mg/kg/day until discharge (max. 60.0mg/day) (oral), n=35<br>2) Prednisolone 1.0mg/kg/day until discharge (max. 60.0mg/day) (oral), n=33<br>3) Prednisolone 2.0mg/kg/day until discharge (max. 60.0mg/day) (oral), n=30 | Bronchodilators (nebulized)<br><br>No CS in preceding 14d | Baseline, 0h, 12h, 24h, 36h, 48h, 60h & 72h; FU 2wks post-enrollment                      | No serious short-term side-effects were noted but hyperactivity related to nebulized B2 agonist therapy was seen. No side-effect possibly attributable to prednisolone therapy was noted in any of the three treatment groups. Three children in prednisolone 2.0mg group were withdrawn because of vomiting, a diagnosis of pneumonia or the parents |

|                                       |                                               |                        |                                                                                                                                                                                                    |                                                         |                         |                                                                                                                                                                                                                                         |
|---------------------------------------|-----------------------------------------------|------------------------|----------------------------------------------------------------------------------------------------------------------------------------------------------------------------------------------------|---------------------------------------------------------|-------------------------|-----------------------------------------------------------------------------------------------------------------------------------------------------------------------------------------------------------------------------------------|
|                                       |                                               |                        |                                                                                                                                                                                                    |                                                         |                         | withdrew consent.                                                                                                                                                                                                                       |
| Lee 2001<br>Taiwan<br>Funding NR      | Case report<br>Pediatric clinic of hospital 1 | Asthma<br>5y           | 1) Terbutaline solution (loading dose: 5.0mg/kg/dose, maintaining dose: 0.6mg/kg/h); Methylprednisolone (BW 21kg, 2.0mg/kg/dose, 40.0mg every 6h) (IV), and; Procaterol 12.5mcg twice daily (oral) | NR                                                      | D1 to D3                | On day 3 of admission the patient was found to have major behaviour changes and hyperventilation. She started screaming unreasonably, gazing forward and sometimes upward and became panic. She had visual hallucinations and delusion. |
| Leer 1969<br>USA<br>Industry funded   | RCT<br>Hospital 5                             | Bronchiolitis<br><30mo | 1) Betamethasone, 1.0mg/5lb first dose and 0.5mg/5lb every 12h (total 3.5mg/5lb (6 doses) for 72h) (IM/IV), n=148<br>2) Aqueous vehicle, 5cc every 12h for 72h for total 6 doses (IM/IV), n=149    | Mist, oxygen, parenteral fluids & antibiotics<br><br>NR | Clinical signs every 6h | There were no detrimental corticosteroid effects in any of the patients. The corticosteroid neither increased the incidence of staphylococcal or other bacterial pneumonias nor masked superinfections.                                 |
| Lehmann 2008<br>Germany<br>Funding NR | Case report<br>Pediatric                      | Asthma<br>2y           | 1) Prednisolone-21-hydrogen                                                                                                                                                                        | None<br><br>3wk washout period (but under               | Post skin prick test    | Patient had been on well-tolerated long-term                                                                                                                                                                                            |

|  |                                     |  |                                                                                                                                                                                 |                                                                                                                                                                 |                                                                                                                                                                                                                                                                                                                                                                                                                                                                                                                                                                                                                                                                                                          |
|--|-------------------------------------|--|---------------------------------------------------------------------------------------------------------------------------------------------------------------------------------|-----------------------------------------------------------------------------------------------------------------------------------------------------------------|----------------------------------------------------------------------------------------------------------------------------------------------------------------------------------------------------------------------------------------------------------------------------------------------------------------------------------------------------------------------------------------------------------------------------------------------------------------------------------------------------------------------------------------------------------------------------------------------------------------------------------------------------------------------------------------------------------|
|  | <p>Allergology<br/>Clinic<br/>1</p> |  | <p>succinate (PSH)<br/>50.0mg (IV)<br/>2) Prednisone<br/>(100.0mg,<br/>suppository)<br/>3)<br/>Betamethasone<br/>(dose NR, oral)<br/>4)<br/>Dexamethasone<br/>(dose NR, IV)</p> | <p>long-term<br/>maintenance<br/>therapy of daily<br/>100mcg fluticasone<br/>propionate<br/>(inhaled) and<br/>intermittent<br/>prednisone<br/>suppositories</p> | <p>therapy of<br/>100mcg<br/>inhaled<br/>fluticasone<br/>dipropionate<br/>daily for<br/>frequently<br/>recurring<br/>episodes of<br/>asthmatic<br/>exacerbations<br/>, with<br/>intermittent<br/>prednisone<br/>suppositories<br/>for acute<br/>bronchopulm<br/>onary<br/>obstruction<br/>with no<br/>occurrence of<br/>adverse<br/>events and no<br/>other<br/>glucocorticoid<br/>preparations.<br/>Patient was<br/>admitted to<br/>department<br/>due to severe<br/>bronchospas<br/>m (neither<br/>bronchodilato<br/>rs nor rectally<br/>administered<br/>prednisone<br/>provided<br/>symptom<br/>relief) and<br/>given 50mg of<br/>prednisolone-<br/>21-hydrogen<br/>succinate<br/>intravenously.</p> |
|--|-------------------------------------|--|---------------------------------------------------------------------------------------------------------------------------------------------------------------------------------|-----------------------------------------------------------------------------------------------------------------------------------------------------------------|----------------------------------------------------------------------------------------------------------------------------------------------------------------------------------------------------------------------------------------------------------------------------------------------------------------------------------------------------------------------------------------------------------------------------------------------------------------------------------------------------------------------------------------------------------------------------------------------------------------------------------------------------------------------------------------------------------|

For peer review only

1  
2  
3  
4  
5  
6  
7  
8  
9  
10  
11  
12  
13  
14  
15  
16  
17  
18  
19  
20  
21  
22  
23  
24  
25  
26  
27  
28  
29  
30  
31  
32  
33  
34  
35  
36  
37  
38  
39  
40  
41  
42  
43  
44  
45  
46  
47  
48  
49  
50  
51  
52  
53  
54  
55  
56  
57  
58  
59  
60

1  
2  
3  
4  
5  
6  
7  
8  
9  
10  
11  
12  
13  
14  
15  
16  
17  
18  
19  
20  
21  
22  
23  
24  
25  
26  
27  
28  
29  
30  
31  
32  
33  
34  
35  
36  
37  
38  
39  
40  
41  
42  
43  
44  
45  
46  
47  
48  
49  
50  
51  
52  
53  
54  
55  
56  
57  
58  
59  
60

|  |  |  |  |  |  |                                                                                                                                                                                                                                                                                                                                                                                                                                                                            |
|--|--|--|--|--|--|----------------------------------------------------------------------------------------------------------------------------------------------------------------------------------------------------------------------------------------------------------------------------------------------------------------------------------------------------------------------------------------------------------------------------------------------------------------------------|
|  |  |  |  |  |  | <p>Within a few minutes the boy developed generalized urticaria, facial angio-oedema, nausea and severe dyspnea requiring nasal oxygen supplementation. Medication was interrupted and symptoms spontaneously resolved within 30 minutes. Testing with PSH at a dilution of 1:10 elicited a positive result (wheal diameter 6 mm), whereas no reactions were observed to prednisone, betamethasone or dexamethasone. An oral provocation test with betamethasone and a</p> |
|--|--|--|--|--|--|----------------------------------------------------------------------------------------------------------------------------------------------------------------------------------------------------------------------------------------------------------------------------------------------------------------------------------------------------------------------------------------------------------------------------------------------------------------------------|

For peer review only

|                             |                 |                    |                                                                                                                                                                                                                                                                                                                                           |                                                                 |                               |                                                                                                                                                                       |
|-----------------------------|-----------------|--------------------|-------------------------------------------------------------------------------------------------------------------------------------------------------------------------------------------------------------------------------------------------------------------------------------------------------------------------------------------|-----------------------------------------------------------------|-------------------------------|-----------------------------------------------------------------------------------------------------------------------------------------------------------------------|
|                             |                 |                    |                                                                                                                                                                                                                                                                                                                                           |                                                                 |                               | titrated intravenous dexamethasone challenge test were tolerated without any complications.                                                                           |
| Leipzig 1979 USA Funding NR | RCT Hospital 2  | Croup 8mo-5y       | 1) Dexamethasone 0.3mg/kg (4mg/ml) 2 doses 2h apart (IM), n=16<br>2) Placebo saline, two doses 2h apart (IM), n=14                                                                                                                                                                                                                        | Vaponephrine, mist tent therapy & racemic epinephrine<br><br>NR | Baseline, 12h & 24h<br><br>NR | We observed no adverse effects or late relapses.                                                                                                                      |
| Lin 1991 Taiwan Funding NR  | NRCT Hospital 1 | Acute wheeze <36mo | 1) Group A: <12mo old (n=29): hydrocortisone 5.0mg/kg loading dose (IV) plus 2.5mg/kg/dose every 6h for 3d + meptin liquid (procaterol hydrochloride) 1.25mcg/kg/dose on admission, then twice daily (oral)<br>2) Group B: >12mo old (n=23): hydrocortisone 5.0mg/kg loading dose (IV) plus 2.5mg/kg/dose every 6h for 3d + meptin liquid | IV fluid, oxygen & antibiotics<br><br>NR                        | Daily for 5d                  | Regarding side effects, two patients in Group B and one patient each in Groups A and C had tremor. One patient in Group A had irritability, and another had diarrhea. |

|                                           |                                                   |                         |                                                                                                                                         |                                 |                                |                                                                                                                                                                                                                                                                 |
|-------------------------------------------|---------------------------------------------------|-------------------------|-----------------------------------------------------------------------------------------------------------------------------------------|---------------------------------|--------------------------------|-----------------------------------------------------------------------------------------------------------------------------------------------------------------------------------------------------------------------------------------------------------------|
|                                           |                                                   |                         | (procaterol hydrochloride) 1.25mcg/kg/dose on admission, then twice daily (oral)<br>3) Group C: No hydrocortisone or procaterol (n=28)  |                                 |                                |                                                                                                                                                                                                                                                                 |
| Lucas-Bouwman 2001 Netherlands Funding NR | RCT Hospital 1                                    | Asthma 3mo-8y (mean 2y) | 1) Prednisolone 1.0mg/kg tablets, twice daily for 5d (oral), n=NR<br>2) Prednisolone 1.0mg/kg solution, twice daily for 5d (oral), n=NR | Bronchodilators (inhaled)<br>NR | 6d to 8d after index visit     | Vomiting was observed in 23% of patients using crushed tablets, and in none of the patients on oral solution.                                                                                                                                                   |
| Nahum 2009 Israel Funding NR              | Case series (n=3, 1 case relevant) Pediatric ED 1 | Asthma 5y               | 1) Methylprednisolone 2.0mg/kg for 2d (IV)                                                                                              | NR                              | D1 & D2; FU 3mo post-discharge | He presented with wheezing, received an intravenous bolus of methylprednisolone sodium succinate (2mg/kg), and immediately developed restlessness and facial rash which resolved spontaneously. On the following day, he received again the same medication and |



|                                      |                                          |                |                                                                                                                                                                                                     |                                       |                                                                                      |                                                                                                                                                                                                                              |
|--------------------------------------|------------------------------------------|----------------|-----------------------------------------------------------------------------------------------------------------------------------------------------------------------------------------------------|---------------------------------------|--------------------------------------------------------------------------------------|------------------------------------------------------------------------------------------------------------------------------------------------------------------------------------------------------------------------------|
|                                      |                                          |                |                                                                                                                                                                                                     |                                       |                                                                                      | immediately developed respiratory distress and cyanosis with oxygen desaturation of 89%. He recovered with oxygen supplementation and was treated afterward with oral betamethasone sodium phosphate without adverse events. |
| Paniagua 2016 Spain Funding NR       | RCT (conference abstract) Pediatric ED 1 | Asthma >12mo   | 1) Dexamethasone, NR, 2 doses (oral), n=287<br>2) Prednisone/prednisolone, NR, 5d (NR), n=290                                                                                                       | NR<br>NR                              | NR; FU at 7d & 15d post-ED visit                                                     | No differences were found regarding vomits (2.1% vs 4.1%).                                                                                                                                                                   |
| Panickar 2009 UK Non-industry funded | RCT Pediatric ED 3                       | Wheeze 10-60mo | 1) Prednisolone 10.0mg/day (10ml) once daily for 10-24mo old (oral); 20.0mg/day (10ml) once daily for >24mo old (oral), for 5d, n=343<br>2) Placebo solution (10ml) once daily for 5d (oral), n=344 | Albuterol, oxygen & antibiotics<br>NR | 4h, 12h & 24h after albuterol & daily post-discharge; FU by phone 1mo post-discharge | No clinically significant adverse events were reported to the patient safety committee. In one child in the prednisolone group, parents attributed excess                                                                    |

|                                |                                                    |                                                                                                                   |                                                                 |          |    |                                                                                                                                                                                                                                                                                                                                                                                            |
|--------------------------------|----------------------------------------------------|-------------------------------------------------------------------------------------------------------------------|-----------------------------------------------------------------|----------|----|--------------------------------------------------------------------------------------------------------------------------------------------------------------------------------------------------------------------------------------------------------------------------------------------------------------------------------------------------------------------------------------------|
|                                |                                                    |                                                                                                                   |                                                                 |          |    | vomiting to the study drug and discontinued the medication after discharge from hospital.                                                                                                                                                                                                                                                                                                  |
| Panigada 2014 Italy Funding NR | Case report Pediatric Pulmonary and Allergy Unit 1 | Progressive shortness of breath, subsequent diagnosis of inflammatory myofibroblastic tumor cell proliferation 5y | Albuterol (inhaled) + prednisone 1.0mg/kg (28.70kg) (oral), n=1 | NR<br>NR | NR | The child was sent home on inhaled albuterol and prednisone to be tapered and discontinued after 7-10 days. Fifteen days after first presentation, 1 day after the discontinuation of prednisone, the boy was readmitted because of progressive shortness of breath. He had moderate-to-severe dyspnoea, inspiratory, and expiratory wheezes: SaO2 was 97% in room air, RR 39 breaths/min. |

1  
2  
3  
4  
5  
6  
7  
8  
9  
10  
11  
12  
13  
14  
15  
16  
17  
18  
19  
20  
21  
22  
23  
24  
25  
26  
27  
28  
29  
30  
31  
32  
33  
34  
35  
36  
37  
38  
39  
40  
41  
42  
43  
44  
45  
46  
47  
48  
49  
50  
51  
52  
53  
54  
55  
56  
57  
58  
59  
60

|  |  |  |  |  |  |                                                                                                                                                                                                                                                                                                                                                                                                                                                                                                           |
|--|--|--|--|--|--|-----------------------------------------------------------------------------------------------------------------------------------------------------------------------------------------------------------------------------------------------------------------------------------------------------------------------------------------------------------------------------------------------------------------------------------------------------------------------------------------------------------|
|  |  |  |  |  |  | <p>Spirometry demonstrated to significant changes in FVC (1.43L), a decrease in FEV1 (1.29L) and a "box-shaped" flow/volume loop, consistent with fixed large airway obstruction. A computed tomography (CT) scan showed an endoluminal mass in the superior portion of the trachea, 15mm from glottis, nearly completely occluding the lumen. Tracheostomy was performed, followed by bronchoscopy . Histological examination of the biopsies showed spindle cells surrounded by collagenous stroma,</p> |
|--|--|--|--|--|--|-----------------------------------------------------------------------------------------------------------------------------------------------------------------------------------------------------------------------------------------------------------------------------------------------------------------------------------------------------------------------------------------------------------------------------------------------------------------------------------------------------------|

For peer review only

|                                                                       |                              |                           |                                                                                                                                                                                                                                                                                                   |                                                                                                  |                                                                                                                                             |                                                                                                                                                                                                                                                                                                             |
|-----------------------------------------------------------------------|------------------------------|---------------------------|---------------------------------------------------------------------------------------------------------------------------------------------------------------------------------------------------------------------------------------------------------------------------------------------------|--------------------------------------------------------------------------------------------------|---------------------------------------------------------------------------------------------------------------------------------------------|-------------------------------------------------------------------------------------------------------------------------------------------------------------------------------------------------------------------------------------------------------------------------------------------------------------|
|                                                                       |                              |                           |                                                                                                                                                                                                                                                                                                   |                                                                                                  |                                                                                                                                             | displaying strong positivity for vimentin, focal positivity for a-smooth muscle actin, and weak positivity for clusterin. No desmin, ALK, S100, CD21, and CD 23 expression was detected. A diagnosis of IMT of the trachea was performed and a complete surgical resection of the neoplasm was carried out. |
| Plint 2009<br>Canada<br>Non-<br>industry<br>and<br>industry<br>funded | RCT<br>Pediatri<br>c ED<br>8 | Bronchiolitis<br>6wk-12mo | 1) Epinephrine<br>3ml 1:1000, 2<br>doses 30min<br>apart (neb) +<br>dexamethasone<br>1.0mg/kg (max<br>10mg) in ED<br>plus 5 once-<br>daily<br>0.6mg/kg/dose,<br>total 6d (oral),<br>n=200<br>2) Epinephrine<br>3ml 1:1000, 2<br>doses 30min<br>apart (neb) +<br>placebo, total<br>6d (oral), n=199 | Bronchodilators<br>(albuterol,<br>epinephrine) &<br>antibiotics<br><br>No CS in preceding<br>2wk | Baseline to<br>30min,<br>60min,<br>120min &<br>240min;<br>FU daily<br>until D7,<br>then every<br>2d until<br>D14 &<br>every 3d<br>until D22 | Adverse<br>events were<br>uncommon<br>(see<br>Supplementar<br>y Appendix).<br>Pallor was<br>reported in 76<br>infants (9.5%),<br>tremor in 15<br>(1.9%), and<br>vomiting in 14<br>(1.8%), with<br>no significant<br>differences<br>among the<br>groups. One<br>hospitalized                                 |

|                             |                |               |                                                                                                                                                                                                           |                                                                                                                                  |                          |                                                                                                                                                                                                                                                                                                                                                                                                                                                    |
|-----------------------------|----------------|---------------|-----------------------------------------------------------------------------------------------------------------------------------------------------------------------------------------------------------|----------------------------------------------------------------------------------------------------------------------------------|--------------------------|----------------------------------------------------------------------------------------------------------------------------------------------------------------------------------------------------------------------------------------------------------------------------------------------------------------------------------------------------------------------------------------------------------------------------------------------------|
|                             |                |               | <p>3) Placebo 2 doses 30min apart (neb) + dexamethasone 1.0mg/kg (max 10mg), total 6d (oral), n=200</p> <p>4) Placebo 2 doses 30min apart (neb) + Placebo solution (max 12ml), total 6d (oral), n=201</p> |                                                                                                                                  |                          | <p>infant in group 2 and one in group 3 had mild, transient hypertension, which resolved rapidly. Supplementar y table: side effects and adverse events, n (Epi + Dex vs. Epi vs. Dex vs. Placebo): Tremor (4 vs. 4 vs. 5 vs. 2); Pallor (23 vs. 22 vs. 15 vs. 16); Vomiting (2 vs. 4 vs. 5 vs. 3); Varicella (0 in all groups); Dark stools (17 vs. 14 vs. 12 vs. 16); Hypertension (0 vs. 1 vs. 1 vs. 0); Hyperkalemia (0 vs. 0 vs. 1 vs. 0)</p> |
| Razi 2015 Turkey Funding NR | RCT Hospital 1 | Asthma 7-72mo | <p>1) Budesonide 1.0mg/2ml, 2 doses for up to 5d, n=50</p> <p>2) Sterile saline 2ml, 2 doses for up to 5d, n=50</p>                                                                                       | Standard care: methylprednisolone 1.0mg/kg/day, for up to 5d (IV) + sal 0.15mg/kg every 4h + ipratropium bromide 250mcg every 6h | Every 4h until discharge | No drug-related adverse effects were identified during hospitalization.                                                                                                                                                                                                                                                                                                                                                                            |

|                                                    |                                                               |                 |                                                                                                                                                                                        |                                     |                                                                                                                                                                |                                                                                                                                                                                                                                                                                                                                                                                                                                                                                                                                                                                                                               |
|----------------------------------------------------|---------------------------------------------------------------|-----------------|----------------------------------------------------------------------------------------------------------------------------------------------------------------------------------------|-------------------------------------|----------------------------------------------------------------------------------------------------------------------------------------------------------------|-------------------------------------------------------------------------------------------------------------------------------------------------------------------------------------------------------------------------------------------------------------------------------------------------------------------------------------------------------------------------------------------------------------------------------------------------------------------------------------------------------------------------------------------------------------------------------------------------------------------------------|
|                                                    |                                                               |                 |                                                                                                                                                                                        | NR                                  |                                                                                                                                                                |                                                                                                                                                                                                                                                                                                                                                                                                                                                                                                                                                                                                                               |
| Roberts<br>1999<br>Australia<br>Industry<br>funded | RCT<br>Women<br>'s and<br>Childre<br>n's<br>Hospita<br>l<br>1 | Croup<br>6mo-8y | 1) Budesonide<br>2.0mg (4ml) for<br>10min each<br>dose, every 12h<br>(max. 4 doses)<br>(neb), n=42<br>2) Placebo for<br>10min each<br>dose, every 12h<br>(max. 4 doses)<br>(neb), n=40 | NR<br><br>No CS in preceding<br>4wk | Baseline,<br>2h, 6h &<br>12h after<br>first dose,<br>then 12-<br>hourly up<br>to 48h if in<br>hospital;<br>FU by<br>telephone<br>1d & 3d<br>post-<br>discharge | The adverse<br>effects in both<br>groups were<br>attributable<br>to either<br>manifestation<br>s of the<br>disease state<br>or the mode<br>of drug<br>administratio<br>n (Table 3).<br>Four patients<br>(3 placebo, 1<br>budesonide)<br>experienced<br>an<br>exacerbation<br>in symptoms<br>to the point of<br>causing<br>interventional<br>treatment<br>mode outside<br>of the<br>protocol<br>nebulised<br>adrenaline).<br>These<br>exacerbations<br>occurred<br>shortly after<br>beginning<br>nebulisation<br>and were<br>apparently<br>induced due<br>to distress<br>caused by<br>using the<br>nebuliser<br>mask. All four |

|                                             |                       |                 |                                                    |                                  |                                     |                                                                                                                                                                                                                                                                                                                                                                                                                                                              |
|---------------------------------------------|-----------------------|-----------------|----------------------------------------------------|----------------------------------|-------------------------------------|--------------------------------------------------------------------------------------------------------------------------------------------------------------------------------------------------------------------------------------------------------------------------------------------------------------------------------------------------------------------------------------------------------------------------------------------------------------|
|                                             |                       |                 |                                                    |                                  |                                     | of these patients had severe croup symptoms (croup score $\geq 8$ ) at the time of nebulisation. The nebuliser mask was poorly accepted in up to 18% of patients in this study if the four exacerbations were considered to be mediated by nebuliser-induced emotional distress. Table 3 adverse effect profile, n (Bud vs. placebo): Emotional distress (5 vs. 6); Vomiting (2 vs. 3); Rash (0 vs. 2); Eye irritation (1 vs. 1); Irritated tongue (0 vs. 1) |
| Roorda<br>1998<br>Netherlands<br>Funding NR | RCT<br>Hospital<br>NR | Croup<br>4-52mo | 1) Fluticasone propionate 1000mcg, 2 divided doses | NR<br><br>No CS in preceding 48h | Admission, 30min, 2h, 6h, 12h & 24h | No side effects of the treatment regimens were reported                                                                                                                                                                                                                                                                                                                                                                                                      |

|                                              |                                               |                     |                                                                                                                             |                                                     |                                              |                                                                                                                                                                                                                                                                                                                     |
|----------------------------------------------|-----------------------------------------------|---------------------|-----------------------------------------------------------------------------------------------------------------------------|-----------------------------------------------------|----------------------------------------------|---------------------------------------------------------------------------------------------------------------------------------------------------------------------------------------------------------------------------------------------------------------------------------------------------------------------|
|                                              |                                               |                     | 30min apart (MDI), n=9<br>2) Placebo (NR), n=8                                                                              |                                                     |                                              | during the study.                                                                                                                                                                                                                                                                                                   |
| Roosevelt 1996<br>USA<br>Non-industry funded | RCT<br>ED<br>1                                | Bronchiolitis <12mo | 1) Dexamethasone 1.0mg/kg every 24h for max. 3 doses (IM), n=65<br>2) Placebo saline, every 24h for max. 3 doses (IM), n=53 | Antibiotics, bronchodilators & tribavirin<br><br>NR | Admission & every 12h; FU 1wk post-discharge | Three patients had occult blood in their stools; two were in the dexamethasone group. No episodes of gross haematochezia were observed.                                                                                                                                                                             |
| Sadowitz 2012<br>USA<br>Funding NR           | Case series (n=4, 1 case relevant)<br>ED<br>1 | Pharyngitis 3y      | Dexamethasone 10.0mg single dose (oral?) + acetaminophen + amoxicillin, n=1                                                 | NR<br><br>NR                                        | NR                                           | The patient was given a 10-mg dose of dexamethasone in addition to acetaminophen and amoxicillin; she was able to tolerate liquids and was discharged. The patient returned to the ED 2 days later with persistent complaints of fever and sore throat, now with an inability to tolerate oral fluids.<br>Pertinent |



|  |  |  |  |  |  |                                                                                                                                                                                                                                                                                                                                                                                                                                                                                                                                |
|--|--|--|--|--|--|--------------------------------------------------------------------------------------------------------------------------------------------------------------------------------------------------------------------------------------------------------------------------------------------------------------------------------------------------------------------------------------------------------------------------------------------------------------------------------------------------------------------------------|
|  |  |  |  |  |  | physical examination findings included pulse rate of 166 beats per minutes; oral temperature of 40.3 degrees C; dry, erythematous mucous membranes with blood clots; and sores over the tonsils and posterior oropharynx. The tonsils had markedly enlarged from the previous visit. Multiple petechiae were present on the soft palate, with blood noted to be oozing from gums after throat exam. No palpable lymph nodes were found. A completed blood cell (CBC) count demonstrated a white blood cell (WBC) count of 16.4 |
|--|--|--|--|--|--|--------------------------------------------------------------------------------------------------------------------------------------------------------------------------------------------------------------------------------------------------------------------------------------------------------------------------------------------------------------------------------------------------------------------------------------------------------------------------------------------------------------------------------|

1  
2  
3  
4  
5  
6  
7  
8  
9  
10  
11  
12  
13  
14  
15  
16  
17  
18  
19  
20  
21  
22  
23  
24  
25  
26  
27  
28  
29  
30  
31  
32  
33  
34  
35  
36  
37  
38  
39  
40  
41  
42  
43  
44  
45  
46  
47  
48  
49  
50  
51  
52  
53  
54  
55  
56  
57  
58  
59  
60

|  |  |  |  |  |  |                                                                                                                                                                                                                                                                                                                                                                                                                                                                                                                            |
|--|--|--|--|--|--|----------------------------------------------------------------------------------------------------------------------------------------------------------------------------------------------------------------------------------------------------------------------------------------------------------------------------------------------------------------------------------------------------------------------------------------------------------------------------------------------------------------------------|
|  |  |  |  |  |  | x 10 <sup>9</sup> /L with 50% blasts on the peripheral smear, platelet count of 6 x 10 <sup>9</sup> /L, and hemoglobin level of 9.8 g/dL. The patient received 2 fluid boluses of normal saline and was admitted to to the pediatric intensive care unit (PICU) and intubated for airway protection because of rapidly enlarging tonsils. Bone marrow aspiration demonstrated acute lymphocytic leukemia (ALL). The patient was placed in the high-risk treatment group because of dexamethasone administration before the |
|--|--|--|--|--|--|----------------------------------------------------------------------------------------------------------------------------------------------------------------------------------------------------------------------------------------------------------------------------------------------------------------------------------------------------------------------------------------------------------------------------------------------------------------------------------------------------------------------------|

For peer review only

1  
2  
3  
4  
5  
6  
7  
8  
9  
10  
11  
12  
13  
14  
15  
16  
17  
18  
19  
20  
21  
22  
23  
24  
25  
26  
27  
28  
29  
30  
31  
32  
33  
34  
35  
36  
37  
38  
39  
40  
41  
42  
43  
44  
45  
46  
47  
48  
49  
50  
51  
52  
53  
54  
55  
56  
57  
58  
59  
60

For peer review only

|                             |               |            |                           |                                            |        |                                                                                                                                                                                                                                                                                                                                                                                                                                                                                                             |
|-----------------------------|---------------|------------|---------------------------|--------------------------------------------|--------|-------------------------------------------------------------------------------------------------------------------------------------------------------------------------------------------------------------------------------------------------------------------------------------------------------------------------------------------------------------------------------------------------------------------------------------------------------------------------------------------------------------|
|                             |               |            |                           |                                            |        | <p>diagnosis of ALL and in the absence of a pretreatment CBC count following the guidelines for high-risk leukemia established by the Children's Oncology Group. Induction therapy include IV daunorubicin, decadron, asparaginase, and vincristine. The patient's initial course of treatment was complicated by a ruptured duodenal ulcer with peritonitis and osteonecrosis. The patient survived these complications and achieved remission and continues on maintenance chemotherapy at this time.</p> |
| Saito 2017 Japan Funding NR | RCT Pediatric | Asthma <3y | 1) Budesonide 1.0mg/dose, | At admission, received hydrocortisone (IV) | Daily; | Serum cortisol levels in the BIS and PSL                                                                                                                                                                                                                                                                                                                                                                                                                                                                    |

|                                                    |                                    |                           |                                                                                                                                                                                                                                        |                                                                               |                                                                                                                   |                                                                                                                                                                                                                                                                                                                                                            |
|----------------------------------------------------|------------------------------------|---------------------------|----------------------------------------------------------------------------------------------------------------------------------------------------------------------------------------------------------------------------------------|-------------------------------------------------------------------------------|-------------------------------------------------------------------------------------------------------------------|------------------------------------------------------------------------------------------------------------------------------------------------------------------------------------------------------------------------------------------------------------------------------------------------------------------------------------------------------------|
|                                                    | depart<br>ment of<br>hospital<br>1 |                           | twice daily<br>(neb), n=30<br>2) Prednisolone<br>0.5mg/kg, 3<br>times daily (IV),<br>n=20                                                                                                                                              | & one inhalation of<br>procaterol; LTRA<br>for wheezing<br>episodes<br><br>NR | Serum<br>cortisol<br>assessed<br>(assessment<br>method<br>NR) on<br>admission<br>and D4 of<br>hospitalizati<br>on | groups at the<br>time of<br>admission<br>were<br>15.0mcg/dL<br>and<br>17.2mcg/dL<br>(p>0.05),<br>respectively.<br>However,<br>serum levels<br>on the fourth<br>day of<br>hospitalizatio<br>n were<br>17.0mcg/dL<br>and<br>10.9mcg/dL,<br>with<br>significant<br>suppression in<br>the PSL group.<br>Adverse<br>events did not<br>occur in either<br>group. |
| Schuh 2008<br>Canada<br>Non-<br>industry<br>funded | RCT<br>Pediatric ED<br>1           | Bronchiolitis<br>8wk-23mo | 1)<br>Dexamethasone<br>1.0mg/kg in ED<br>+ 4 doses<br>0.15mg/kg<br>starting 24h<br>later, total 5d<br>(oral), n=61<br>2)<br>Dexamethasone<br>1.0mg in ED + 4<br>doses placebo<br>syrup starting<br>24h later, total<br>5d (oral), n=64 | Albuterol<br><br>Baseline reports 3<br>patients with prior<br>inhaled ICS     | Baseline,<br>D4 & D6<br>(home<br>visits);<br>FU by<br>telephone<br>on D28                                         | The mean<br>blood<br>pressure<br>increased<br>from 96.1+/-<br>8.8 mmHg to<br>99.5+/-14.8<br>mmHg in the<br>single-dose<br>group and<br>from 96.4+/-<br>7.9 mmHg to<br>103+/-<br>16.8mmHg in<br>the multiple<br>dose group.<br>Bag urine was<br>obtained on                                                                                                 |

|                                            |                              |               |                                                                                                                                                                                                                                                                                                      |                                                                                                                                           |          |                                                                                                                                                                                                                                                                                                                                                                                       |
|--------------------------------------------|------------------------------|---------------|------------------------------------------------------------------------------------------------------------------------------------------------------------------------------------------------------------------------------------------------------------------------------------------------------|-------------------------------------------------------------------------------------------------------------------------------------------|----------|---------------------------------------------------------------------------------------------------------------------------------------------------------------------------------------------------------------------------------------------------------------------------------------------------------------------------------------------------------------------------------------|
|                                            |                              |               |                                                                                                                                                                                                                                                                                                      |                                                                                                                                           |          | day 6 visit in 47 study infants and tested positive for glucose in 1 child belonging to the multiple-dose group.                                                                                                                                                                                                                                                                      |
| Schuh 2009<br>Canada<br>Industry<br>funded | RCT<br>Pediatri<br>c ED<br>1 | Asthma<br>≥2y | 1) Montelukast<br>1.0mg/kg:<br>2-5y=4.0mg;<br>6-14y=5.0mg;<br>and,<br>15-17y=10.0mg<br>at 24h, 48h,<br>72h, 96h & 120h<br>(oral), n=67<br>2)<br>Prednisone/pre<br>dnisolone<br>1.0mg/kg: 2-<br>5y=4.0mg;<br>6-14y=5.0mg;<br>and 15-<br>17y=10.0mg at<br>24h, 48h, 72h,<br>96h & 120h<br>(oral), n=63 | Albuterol &<br>fluticasone<br><br>>1 single dose or<br>oral prednisolone<br>or >250mcg per day<br>of inhaled<br>fluticasone within<br>72h | 48h & D8 | In the montelukast group, adverse effects developed in 3 patients. One patient experienced facial swelling of unknown etiology at 96 hours, another patient had vomiting and diarrhea at 72 hours, and the third patient complained of abdominal and leg pains on day 4. None of these patients required treatment for these events, and the relationship between montelukast and the |

|                                          |                                           |                                                    |                                                                                                                                   |                               |                                                                     |                                                                                                                                                                                                                                                                                                                                                                                                 |
|------------------------------------------|-------------------------------------------|----------------------------------------------------|-----------------------------------------------------------------------------------------------------------------------------------|-------------------------------|---------------------------------------------------------------------|-------------------------------------------------------------------------------------------------------------------------------------------------------------------------------------------------------------------------------------------------------------------------------------------------------------------------------------------------------------------------------------------------|
|                                          |                                           |                                                    |                                                                                                                                   |                               |                                                                     | “event” is questionable. No adverse effects developed in the children given prednisolone after discharge.                                                                                                                                                                                                                                                                                       |
| Siomou 2003<br>Greece<br>Industry funded | Case control, 3-arm<br>Pediatric hospital | Bronchiolitis, viral wheezing, or croup<br>2mo-10y | 1) Hydrocortisone 10.0mg/kg/day for 3d (NR), n=28<br>2) Methylprednisolone 2.0mg/kg for 3 days (NR), n=21<br>3) Control, 3d, n=51 | NR<br>Never/no CS in last 2mo | Baseline, 2 days after CS administration & 12d after end of therapy | In summary, short-term IV corticosteroid administration to children suffering from acute respiratory diseases led to partial but reversible inhibition of bone formation markers, especially detectable in the >1-year-old children, without affecting the bone resorption markers. The fall in the serum phosphate levels and decrease in the maximum renal phosphate reabsorption decrease in |

|                                                                             |                                                 |                                                 |                                                                                                                                                                                                    |                                                                                                                                        |                                                                                                                                          |                                                                                                                                                                                                    |
|-----------------------------------------------------------------------------|-------------------------------------------------|-------------------------------------------------|----------------------------------------------------------------------------------------------------------------------------------------------------------------------------------------------------|----------------------------------------------------------------------------------------------------------------------------------------|------------------------------------------------------------------------------------------------------------------------------------------|----------------------------------------------------------------------------------------------------------------------------------------------------------------------------------------------------|
|                                                                             |                                                 |                                                 |                                                                                                                                                                                                    |                                                                                                                                        |                                                                                                                                          | the maximum renal phosphate reabsorption were significant but transient.                                                                                                                           |
| Sparrow 2006<br>Australia<br>Funding NR                                     | RCT<br>Pediatri<br>c ED<br>1                    | Croup<br>mean 37mo<br>(28.8) vs.<br>45mo (31.6) | 1) Dexamethasone<br>0.2ml/kg of 0.15<br>mg/kg, single<br>dose (oral),<br>n=68<br>2) Prednisolone<br>0.2ml/kg of<br>1.0mg/kg, single<br>dose (oral),<br>n=65                                        | Adrenaline<br><br>No CS preceding<br>study                                                                                             | Enrolment,<br>30min post-<br>treatment,<br>hourly for<br>next 4h &<br>every 4h<br>until<br>discharge;<br>FU 7d-10d<br>post-<br>discharge | No adverse<br>events were<br>noted in<br>either group.                                                                                                                                             |
| Stafford<br>1998<br>Australia<br>Industry<br>and non-<br>industry<br>funded | NRCT<br>Pediatri<br>c<br>hospital<br>or ED<br>1 | Asthma/cro<br>up<br>1-12y                       | 1) Prednisolone<br>5.0mg/ml<br>solution (oral),<br>n=8<br>2) PredMix<br>5.0mg/ml<br>solution (oral),<br>n=46<br>3)<br>Dexamethasone<br>5.0mg/ml (oral),<br>n=80                                    | NR<br><br>NR                                                                                                                           | Daily                                                                                                                                    | No significant<br>differences<br>were found<br>regarding the<br>incidence of<br>nausea,<br>vomiting and<br>abdominal<br>pain, or any of<br>the objective<br>parameters<br>tested.                  |
| Storr 1987<br>UK<br>Non-<br>industry &<br>industry<br>funded                | RCT<br>Pediatri<br>c<br>hospital<br>1           | Asthma<br>NR (mean<br>5y)                       | 1) Prednisolone<br>30.0mg (<5yo),<br>otherwise<br>60.0mg, max.<br>dose 3.0mg/kg<br>(range 1.0-<br>3.0mg/kg) single<br>dose (oral),<br>n=67<br>2) Placebo<br>solution<br>identical to<br>treatment, | Salbutamol 5.0mg<br>in 2ml saline (neb),<br>on admission & 3<br>times or more daily<br>when indicated<br><br>No CS in preceding<br>48h | Admission,<br>4h, 12h,<br>24h & 36h                                                                                                      | Prednisolone<br>has a bitter<br>aftertaste.<br>Most children<br>disliked the<br>drink. 2<br>children in<br>each group<br>vomited<br>almost<br>immediately<br>and were<br>consequently<br>excluded. |

|                                                      |                                                                     |                            |                                                                                                               |                                                                                   |                                                             |                                                                                                                                                                                                                                                                                        |
|------------------------------------------------------|---------------------------------------------------------------------|----------------------------|---------------------------------------------------------------------------------------------------------------|-----------------------------------------------------------------------------------|-------------------------------------------------------------|----------------------------------------------------------------------------------------------------------------------------------------------------------------------------------------------------------------------------------------------------------------------------------------|
|                                                      |                                                                     |                            | single dose (oral), n=73                                                                                      |                                                                                   |                                                             | There were no observed side-effects related to the single prednisolone dose.                                                                                                                                                                                                           |
| Sumboonn<br>anonda<br>1997<br>Thailand<br>Funding NR | RCT<br>Pediatri<br>c<br>hospital<br>1                               | Croup<br><5y               | 1)<br>Dexamethasone<br>0.5mg/kg/d, 3d<br>(IM/IV), n=14<br>2) Control, n=18                                    | Aerosolized<br>adrenaline,<br>antibiotics, IV fluid<br>& cool mist<br><br>NR      | Admission,<br>24h & 48h;<br>FU 3wks<br>post-<br>discharge   | Complications<br>included<br>pneumonia in<br>4 controls,<br>Acinetobacter<br>sepsis in 1<br>control and<br>bacterial<br>tracheitis in 1<br>cases.                                                                                                                                      |
| Sung 1998<br>Canada<br>Non-<br>industry<br>funded    | RCT<br>Tertiary<br>pediatri<br>c<br>hospital<br>1                   | Asthma<br>>6mo or<br><18y  | 1) Budesonide<br>4000mcg (4ml),<br>single dose<br>(neb), n=24<br>2) Placebo,<br>single dose<br>(neb), n=20    | Salbutamol<br>0.15mg/kg every<br>30min for 3 doses,<br>then hourly for 4<br>doses | Baseline,<br>discharge &<br>7d to 10d<br>post-<br>treatment | No adverse<br>effects were<br>noted in<br>either group.                                                                                                                                                                                                                                |
| Super 1989<br>USA<br>Funding NR                      | RCT<br>General<br>hospital<br>or<br>childre<br>n's<br>hospital<br>2 | Croup<br>NR (mean<br>16mo) | 1)<br>Dexamethasone<br>0.6mg/kg, single<br>dose (IM), n=16<br>2) Placebo<br>saline, single<br>dose (IM), n=13 | Mist, racemic<br>epinephrine,<br>oxygen &<br>antibiotics                          | Baseline,<br>30min, and<br>every 12h<br>until<br>discharge  | In two<br>dexamethaso<br>ne-treated<br>patients in the<br>main study,<br>including one<br>with a<br>culture-<br>positive<br>influenza A<br>viral infection,<br>laryngotrachei<br>tis progressed<br>to<br>pneumonia.<br>The other<br>patient was<br>the one who<br>received a<br>second |



|                                                      |                         |                                                    |                                                                                                                                                                                                                                                 |                                                                            |       |                                                                                                                                                                                               |
|------------------------------------------------------|-------------------------|----------------------------------------------------|-------------------------------------------------------------------------------------------------------------------------------------------------------------------------------------------------------------------------------------------------|----------------------------------------------------------------------------|-------|-----------------------------------------------------------------------------------------------------------------------------------------------------------------------------------------------|
|                                                      |                         |                                                    |                                                                                                                                                                                                                                                 |                                                                            |       | injection of dexamethasone. At the time of his second injection, he had roentgenographic evidence of pneumonia. We did not encounter any side effects directly attributable to dexamethasone. |
| Sussman<br>1964<br>USA<br>Non-<br>industry<br>funded | RCT<br>Hospital<br>NR   | Bronchiolitis<br>1-25mo;<br>Laryngitis<br>15mo-10y | 1) Dexamethasone<br>0.1mg in divided<br>daily dose every<br>6h:<br>D1-<br>9=0.2ml/lb/day;<br>D10-<br>11=0.1ml/lb/day;<br>D12-<br>13=0.05ml/lb/day;<br>D14=0.02ml/lb/day (IM), n=31<br>2) Sodium<br>chloride<br>0.15mEq/ml for<br>14d (IM), n=26 | Oxygen, penicillin &<br>streptomycin<br>NR                                 | Daily | Adverse reactions to steroid therapy were not noted on clinical examination and superinfections, bacterial or viral dissemination, were not encountered.                                      |
| Svedmyr<br>1995<br>Sweden<br>Funding NR              | RCT,<br>crossover<br>NR | Asthma<br>3-10y                                    | 1) Budesonide<br>0.2mg 4 times<br>daily for first 3d,<br>0.2mg 3 times<br>daily for next 3d<br>and 0.2mg twice                                                                                                                                  | Maintenance<br>bronchodilators<br>permitted<br>No CS in preceding<br>month | NR    | Ten adverse events were reported in the budesonide group and                                                                                                                                  |

|                                                           |                                                  |                                                     |                                                                                                                                                                                                                                |                                                                        |                      |                                                                                                                                                                                                                                                                                |
|-----------------------------------------------------------|--------------------------------------------------|-----------------------------------------------------|--------------------------------------------------------------------------------------------------------------------------------------------------------------------------------------------------------------------------------|------------------------------------------------------------------------|----------------------|--------------------------------------------------------------------------------------------------------------------------------------------------------------------------------------------------------------------------------------------------------------------------------|
|                                                           |                                                  |                                                     | <p>daily for last 3d (neb), n=NR (all groups=26)</p> <p>2) Placebo (NR), n=NR (all groups=26)</p> <p>Multiple courses; 17 children completed one paired (Grp 1&amp;2) treatment; 15 children completed 4 paired treatments</p> |                                                                        |                      | <p>nine in the placebo group. There were two cases of dysphonia in the budesonide group. The other events were correlated more to the children's URTI such as headache, diarrhoea, epistaxis or sore throat. There were no significant differences between the two groups.</p> |
| <p>Svedmyr 1999<sup>1</sup><br/>Sweden<br/>Funding NR</p> | <p>RCT<br/>Pediatri<br/>c<br/>hospital<br/>4</p> | <p>Asthma –<br/>first sign of<br/>URTI<br/>1-3y</p> | <p>1) Budesonide 400mcg, 4 times daily for 3d then twice daily for 7d (MDI), n=28</p> <p>2) Placebo, 4 times daily for 3d then twice daily for 7d (MDI), n=27</p> <p>Multiple courses over 1yr, or max. 6 treatments</p>       | <p>Beta-agonists and/or theophylline</p> <p>No CS in preceding 2mo</p> | <p>Daily for 10d</p> | <p>In the budesonide group a 24-month-old girl discontinued treatment during the first treatment period because of a suspected side effect. The child became emotionally unstable and vomited after inhaling the study drug.</p>                                               |

|  |  |  |  |  |  |                                                                                                                                                                                                                                                                                                                                                                                                                                                                                                             |
|--|--|--|--|--|--|-------------------------------------------------------------------------------------------------------------------------------------------------------------------------------------------------------------------------------------------------------------------------------------------------------------------------------------------------------------------------------------------------------------------------------------------------------------------------------------------------------------|
|  |  |  |  |  |  | <p>Almost 1 y later, she used budesonide for 10 d with no side effects at all. The symptom of hoarseness, a well-known side effect with ICS, is of special interest. Nine children reported 18 episodes of hoarseness in the placebo group, compared with 2 children reporting 4 episodes in the budesonide group. This difference was statistically significant (<math>p = 0.024</math>). Figure 4 – bar chart of adverse events (counts, only once per treatment period), including vomiting, otitis,</p> |
|--|--|--|--|--|--|-------------------------------------------------------------------------------------------------------------------------------------------------------------------------------------------------------------------------------------------------------------------------------------------------------------------------------------------------------------------------------------------------------------------------------------------------------------------------------------------------------------|

|                                        |                              |                     |                                                                                                                                                                                                                      |                                             |                                                                        |                                                                                                                                                                                                                                                                           |
|----------------------------------------|------------------------------|---------------------|----------------------------------------------------------------------------------------------------------------------------------------------------------------------------------------------------------------------|---------------------------------------------|------------------------------------------------------------------------|---------------------------------------------------------------------------------------------------------------------------------------------------------------------------------------------------------------------------------------------------------------------------|
|                                        |                              |                     |                                                                                                                                                                                                                      |                                             |                                                                        | hoarseness, sore throat, conjunctivitis, croup, stomach ache, diarrhea, agitation, sleep disturbances, and aggressiveness.                                                                                                                                                |
| Tagarro 2014 Spain Non-industry funded | Cohort University hospital 1 | Bronchiolitis 0-6mo | 1) Dexamethasone 1.0mg single dose, or for 6d, or 1.0mg on first day plus 0.6mg for 5d, 6d total (likely oral), n=33<br>2) Prednisone 1.0-2.0mg for 5d (likely oral), n=15<br>3) No steroids, dose/duration NR, n=32 | Adrenaline & salbutamol<br><br>NR           | NR                                                                     | No significant adverse effects attributable to steroids or bronchodilators were found in the clinical records, apart from hyperglycemia. Hyperglycemia was found in 4 out of 23 patients tested (17%). Two of them had received PRD, one of them DXM and one no steroids. |
| Tal 1983 Israel Non-industry funded    | RCT Hospital 1               | Acute wheeze 1-12mo | 1) Dexamethasone 0.3mg/kg (4mg/ml) on admission + 0.1 mg/kg every 8h (IM), n=8<br>2) a) Sal solution 2.5mg (0.5ml),                                                                                                  | Oral/IV fluid & humidified oxygen<br><br>NR | Admission, 3h after first IM dose & each morning (8am) until discharge | One infant developed a remarkable tremor as a side effect of salbutamol. No other side effects or complications                                                                                                                                                           |

|                                    |                                               |                                                       |                                                                                                                                                                                                                                                                                                                                                                                                                                                               |          |    |                                                                                                                                                        |
|------------------------------------|-----------------------------------------------|-------------------------------------------------------|---------------------------------------------------------------------------------------------------------------------------------------------------------------------------------------------------------------------------------------------------------------------------------------------------------------------------------------------------------------------------------------------------------------------------------------------------------------|----------|----|--------------------------------------------------------------------------------------------------------------------------------------------------------|
|                                    |                                               |                                                       | <p>on admission &amp; every 6h (neb);<br/> b) Sal syrup, 0.15mg/kg, every 8h (oral);<br/> and,<br/> c) Placebo saline (IM), n=8<br/> 3)<br/> Dexamethasone 0.3mg/kg (4mg/ml) on admission + 0.1mg/kg every 8h (IM);<br/> a) Sal solution 2.5mg (0.5ml), on admission &amp; every 6h (neb);<br/> and,<br/> b) Sal syrup, 0.15mg/kg, every 8h (oral), n=8<br/> 4) Placebo saline 0.075ml/kg on admission, then 0.025ml/kg every 8h during next 3d (IM), n=8</p> |          |    | of the treatment were documented.                                                                                                                      |
| Tamura 2008<br>Japan<br>Funding NR | Case series<br>Medical center, inpatient<br>1 | Refractory mycoplasma pneumonia 5y (n=6, range 3y-9y) | Methylprednisolone 30.0mg/kg once daily for 3d (IV), n=1                                                                                                                                                                                                                                                                                                                                                                                                      | NR<br>NR | NR | All cases: There were no adverse events in any patients during steroid treatment; Case patient 1: On the 10th clinical day, we initiated methylprednis |

1  
2  
3  
4  
5  
6  
7  
8  
9  
10  
11  
12  
13  
14  
15  
16  
17  
18  
19  
20  
21  
22  
23  
24  
25  
26  
27  
28  
29  
30  
31  
32  
33  
34  
35  
36  
37  
38  
39  
40  
41  
42  
43  
44  
45  
46  
47  
48  
49  
50  
51  
52  
53  
54  
55  
56  
57  
58  
59  
60

|                                                            |                                             |                               |                                                                                                                  |                                                                                                             |                                                                                                                   |                                                                                                                                                                                                                                                                                                                                                                                      |
|------------------------------------------------------------|---------------------------------------------|-------------------------------|------------------------------------------------------------------------------------------------------------------|-------------------------------------------------------------------------------------------------------------|-------------------------------------------------------------------------------------------------------------------|--------------------------------------------------------------------------------------------------------------------------------------------------------------------------------------------------------------------------------------------------------------------------------------------------------------------------------------------------------------------------------------|
|                                                            |                                             |                               |                                                                                                                  |                                                                                                             |                                                                                                                   | <p>alone pulse therapy once daily for 3 days. Six hours after the initiation of steroid therapy, she became afebrile. On the next day, dyspnea was resolved. Chest radiograph on that day showed dramatic improvement. Five days after the initiation of steroid therapy, laboratory findings were normalized. She was discharged on the 17th day of admission without sequelae.</p> |
| <p>Teeratakul pisarn 2007 Thailand Non-industry funded</p> | <p>RCT Pediatric outpatient or ED<br/>2</p> | <p>Bronchiolitis 4wk-24mo</p> | <p>1) Dexamethasone 0.6mg/kg, single dose (IM), n=89<br/>2) Saline solution 0.6mg/kg, single dose (IM), n=85</p> | <p>Epinephrine, salbutamol, IV fluids, antimicrobial drugs &amp; oxygen<br/><br/>No CS in preceding 2wk</p> | <p>Baseline &amp; every 6h until study endpoint (resolution of respiratory distress); FU at 2wk intervals for</p> | <p>Soon after study endpoint, but before being discharged, systemic CS was prescribed to seven children (four in the dexamethaso</p>                                                                                                                                                                                                                                                 |

1  
2  
3  
4  
5  
6  
7  
8  
9  
10  
11  
12  
13  
14  
15  
16  
17  
18  
19  
20  
21  
22  
23  
24  
25  
26  
27  
28  
29  
30  
31  
32  
33  
34  
35  
36  
37  
38  
39  
40  
41  
42  
43  
44  
45  
46  
47  
48  
49  
50  
51  
52  
53  
54  
55  
56  
57  
58  
59  
60

|  |  |  |  |  |                 |                                                                                                                                                                                                                                                                                                                                                                                                                                                                                                    |
|--|--|--|--|--|-----------------|----------------------------------------------------------------------------------------------------------------------------------------------------------------------------------------------------------------------------------------------------------------------------------------------------------------------------------------------------------------------------------------------------------------------------------------------------------------------------------------------------|
|  |  |  |  |  | at least<br>1mo | ne group) because of re-wheezing. None of the children received theophylline or ribavirin. Three children (two in the dexamethasone group) developed occult blood in stools. Six children (three in the dexamethasone group) had subsequent diarrhea. Three children (all in the placebo group) had subsequent pneumonia with suspicious bacterial causes and required additional antibiotics. Table 5 - probable adverse outcomes of treatment up to 1 month post-treatment, n (Dex vs. Placebo): |
|--|--|--|--|--|-----------------|----------------------------------------------------------------------------------------------------------------------------------------------------------------------------------------------------------------------------------------------------------------------------------------------------------------------------------------------------------------------------------------------------------------------------------------------------------------------------------------------------|

For peer review only

|                                                        |                                           |                            |                                                                                                                                                                                                                                               |                                                                                    |                                                             |                                                                                                                                                                                      |
|--------------------------------------------------------|-------------------------------------------|----------------------------|-----------------------------------------------------------------------------------------------------------------------------------------------------------------------------------------------------------------------------------------------|------------------------------------------------------------------------------------|-------------------------------------------------------------|--------------------------------------------------------------------------------------------------------------------------------------------------------------------------------------|
|                                                        |                                           |                            |                                                                                                                                                                                                                                               |                                                                                    |                                                             | Occult blood in stools (2 vs. 1);<br>Pneumonia (0 vs. 0);<br>Diarrhea (3 vs. 3)                                                                                                      |
| van Woensel 1997<br>Netherlands<br>Non-industry funded | RCT<br>Hospital<br>1                      | Bronchiolitis<br><2y       | 1) Prednisolone powder<br>1.0mg/kg/day in 2 divided doses for 7d (oral), n=27<br>2) Placebo in 2 divided doses for 7d (oral), n=27                                                                                                            | Oxygen, bronchodilators, or antibiotics<br><br>No CS in preceding 2mo              | Baseline & daily for 7d                                     | In the present study no clinically significant side effects of prednisolone were found.                                                                                              |
| Webb 1986<br>UK<br>Non-industry funded                 | RCT, crossover<br>"unit", outpatient<br>1 | Persistent wheeze<br><18mo | 1) Prednisolone 1.0mg/kg, twice daily for 5d (oral), n=NR (total patients in study = 38)<br>2) Placebo, twice daily for 5d (oral), n=18<br><br>crossed over<br><br>Multiple courses;<br>38 children completed a total of 56 treatment courses | Bronchodilator & antibiotics<br><br>NR                                             | Daily for 5d & clinical exam 3d after treatment course (D8) | There were no side effects reported by the parents and none was detected on clinical examination at the time of review three days after completing the five day course of treatment. |
| Zhang 2003<br>Brazil<br>Non-industry funded            | RCT<br>Pediatric hospital ward<br>1       | Bronchiolitis<br><12mo     | 1) Prednisolone 1.0mg (oral) + standard care for 5d (NR), n=28<br>2) Standard care (oxygen, fluid replacement, nebulised                                                                                                                      | IV hydrocortisone in first 24h after hospitalization<br><br>No CS in preceding 4wk | Enrolment, 1mo, 3mo, 6mo & 12mo after discharge             | The potential side-effects of prednisolone were not included as outcome measures in this study as the safety of                                                                      |



|  |  |  |                              |  |  |                                                                                                                                                                                                                    |
|--|--|--|------------------------------|--|--|--------------------------------------------------------------------------------------------------------------------------------------------------------------------------------------------------------------------|
|  |  |  | fenoterol) for 5d (NR), n=24 |  |  | short-term steroid therapy has been well confirmed. At the time of analysis of the data, all 52 patients' hospital records were reviewed and no adverse event was noted in the patients who received prednisolone. |
|--|--|--|------------------------------|--|--|--------------------------------------------------------------------------------------------------------------------------------------------------------------------------------------------------------------------|

<sup>1</sup>Hedlin 1999 and Svedmyr 1999 are associated publications; Svedmyr 1999 reports on an RCT comparing budesonide with placebo, and Hedlin 1999 reports systemic effects on a subgroup of these children with moderate to severe asthma exacerbations who required additional treatment (with oral betamethasone) and/or hospitalization; admin: administration; BW: birthweight; cc: cubic centrimetre(s); CCT: controlled clinical trial; cm: centimeter(s); CS: corticosteroid; d/D: day(s); ED: emergency department; FP: fluticasone propionate; FU: follow-up; g: gram(s); h: hour(s); IM: intramuscular; IV: intravenous; kg: kilogram(s); L: litre(s); max.: maximum; mcg: microgram(s); MDI: metered-dose inhaler; mg: milligram(s); mL: milliliter(s); mo: month(s); neb: nebulized; NR: not reported; NRCT: non-randomized clinical trial; RCT: randomized clinical trial; RSV: respiratory syncytial virus; SA: Saudi Arabia; sal: salbutamol; UK: United Kingdom; URTI: upper respiratory tract infection; vs: versus; wk: week(s); y: year(s); yo: year old

## Supplement 4. Methodological quality assessments of included studies

| Study (year)         | Harms pre-defined | Serious AE defined | Severe AE defined | Deaths specified | Mode of collection |         | Who collected AE | Training/ background of assessors | Timing/ frequency of AE collection | Checklist used for AE | Encompass all AE | Withdrawal and losses to follow-up specified | AE in each arm specified | No. and type of AE specified | Type of analysis |
|----------------------|-------------------|--------------------|-------------------|------------------|--------------------|---------|------------------|-----------------------------------|------------------------------------|-----------------------|------------------|----------------------------------------------|--------------------------|------------------------------|------------------|
|                      |                   |                    |                   |                  | ACTIVE             | PASSIVE |                  |                                   |                                    |                       |                  |                                              |                          |                              |                  |
| Alangari (2014)      | N                 | N                  | N                 | N                | N                  | N       | N                | N                                 | N                                  | N                     | Y                | N                                            | N                        | N                            | N                |
| Alansari (2013)      | N                 | N                  | N                 | N                | Y                  | N       | Y                | Y                                 | Y                                  | N                     | Y                | Y                                            | N                        | N                            | N                |
| Aljebab (2017)       | Y                 | N                  | N                 | N                | Y                  | Y       | Y                | Y                                 | Y                                  | U                     | Y                | Y                                            | N                        | Y                            | Y                |
| Alshehr (2005)       | N                 | N                  | N                 | N                | N                  | N       | N                | N                                 | N                                  | N                     | Y                | N                                            | N                        | Y                            | N                |
| Altamimi (2006)      | N                 | N                  | N                 | N                | Y                  | N       | Y                | Y                                 | Y                                  | N                     | Y                | Y                                            | N                        | Y                            | N                |
| Bacharier (2008)     | N                 | N                  | N                 | N                | N                  | N       | N                | N                                 | N                                  | N                     | Y                | Y                                            | N                        | N                            | N                |
| Bisgaard (2006)      | Y                 | N                  | N                 | N                | Y                  | N       | N                | N                                 | Y                                  | N                     | N                | Y                                            | Y                        | U                            | Y                |
| Bjornson (2004)      | N                 | N                  | N                 | N                | Y                  | N       | Y                | Y                                 | Y                                  | N                     | Y                | N                                            | N                        | Y                            | N                |
| Brunette (1988)      | Y                 | N                  | N                 | N                | Y                  | N       | N                | N                                 | Y                                  | Y                     | Y                | N                                            | N                        | Y                            | Y                |
| Buckingham (2002)    | N                 | N                  | N                 | Y                | Y                  | N       | Y                | Y                                 | Y                                  | N                     | Y                | N                                            | N                        | Y                            | N                |
| Bulow (1999)         | N                 | N                  | N                 | N                | N                  | N       | N                | N                                 | N                                  | N                     | Y                | N                                            | Y                        | N                            | N                |
| Chang (2008)         | N                 | N                  | N                 | N                | Y                  | N       | N                | N                                 | Y                                  | N                     | Y                | Y                                            | Y                        | Y                            | N                |
| Chen (2008)          | N                 | N                  | N                 | N                | N                  | N       | N                | N                                 | N                                  | N                     | Y                | N                                            | N                        | N                            | N                |
| Chub-Appakarn (2007) | N                 | N                  | N                 | N                | N                  | N       | N                | N                                 | N                                  | N                     | Y                | N                                            | N                        | N                            | N                |
| Clavenna (2014)      | N                 | N                  | N                 | N                | Y                  | Y       | Y                | Y                                 | Y                                  | N                     | Y                | Y                                            | N                        | N                            | N                |
| Connett (1994)       | N                 | N                  | N                 | N                | N                  | N       | N                | N                                 | N                                  | N                     | Y                | N                                            | N                        | Y                            | N                |
| Connolly (1969)      | N                 | N                  | N                 | Y                | Y                  | N       | N                | N                                 | Y                                  | N                     | Y                | N                                            | N                        | Y                            | N                |
| Corneli (2007)       | N                 | N                  | N                 | N                | Y                  | N       | Y                | Y                                 | Y                                  | N                     | Y                | Y                                            | N                        | N                            | N                |

|    |                            |   |   |   |   |   |   |   |   |   |   |   |   |   |   |   |
|----|----------------------------|---|---|---|---|---|---|---|---|---|---|---|---|---|---|---|
| 1  |                            |   |   |   |   |   |   |   |   |   |   |   |   |   |   |   |
| 2  |                            |   |   |   |   |   |   |   |   |   |   |   |   |   |   |   |
| 3  | Cronin (2016)              | N | N | N | N | Y | Y | Y | Y | Y | N | Y | Y | N | Y | N |
| 4  | Csonka (2003)              | N | N | N | N | N | N | N | N | N | N | Y | Y | Y | Y | N |
| 5  | Daugbjerg (1993)           | N | N | N | N | N | N | N | N | N | N | Y | N | Y | Y | N |
| 6  | Dawson (1993)              | N | N | N | N | Y | Y | Y | Y | Y | U | Y | N | N | N | N |
| 7  | Ducharme (2009)            | Y | Y | N | N | Y | N | Y | Y | Y | N | Y | Y | Y | Y | Y |
| 8  | Eboriadou (2010)           | N | N | N | N | Y | N | N | N | N | N | Y | N | N | U | N |
| 9  | Eden (1967)                | N | N | N | Y | N | N | N | N | N | N | Y | N | N | U | N |
| 10 | Escobedo Chavez (1992)     | N | N | N | N | N | N | N | N | N | N | Y | N | N | N | N |
| 11 | Fifoot (2007)              | N | N | N | N | N | N | N | N | N | N | Y | Y | N | N | N |
| 12 | Fitzgerald (1996)          | N | N | N | N | U | U | N | N | Y | N | Y | Y | N | N | Y |
| 13 | Francis (1997)             | N | Y | N | N | N | N | N | N | N | N | U | Y | Y | N | N |
| 14 | Garbutt (2013)             | N | N | N | N | Y | N | Y | Y | Y | N | Y | N | N | N | N |
| 15 | Ghirga (2002)              | N | N | N | N | N | N | N | N | N | N | Y | N | N | N | N |
| 16 | Gill (2017)                | N | N | N | Y | Y | N | N | N | Y | N | Y | N | N | Y | Y |
| 17 | Goebel (2000)              | N | N | N | N | Y | N | Y | Y | Y | N | N | N | N | Y | N |
| 18 | Grant (1996)               | N | N | N | N | Y | Y | N | N | Y | N | Y | N | N | N | Y |
| 19 | Gries (2000)               | N | N | N | N | Y | N | Y | Y | Y | N | Y | N | N | Y | Y |
| 20 | Hedlin (1999) <sup>1</sup> | N | N | N | N | Y | N | Y | N | Y | Y | Y | N | Y | Y | Y |
| 21 | Husby (1993)               | N | N | N | N | U | N | Y | N | Y | N | Y | N | N | N | N |
| 22 | Inglis (1993)              | N | N | N | Y | Y | Y | N | N | Y | N | Y | Y | Y | Y | N |
| 23 | Jan (2000)                 | N | N | N | N | Y | N | N | N | Y | Y | Y | N | N | N | N |
| 24 | Jartti (2006)              | N | N | N | N | N | N | N | N | N | N | Y | N | N | N | N |
| 25 | Jartti (2007)              | N | N | N | N | N | N | N | N | N | N | Y | N | N | N | N |
| 26 | Jartti (2015)              | N | N | N | N | N | N | N | N | N | N | U | Y | N | N | N |
| 27 | Johnson (1996)             | N | N | N | N | N | N | N | N | N | N | Y | N | N | Y | N |
| 28 | Johnson (1998)             | N | N | N | N | N | N | N | N | N | N | U | N | N | Y | N |
| 29 | Klassen (1994)             | N | N | N | N | N | N | N | N | N | N | Y | N | N | Y | N |
| 30 | Klassen (1996)             | N | N | N | N | N | N | N | N | N | N | Y | N | N | Y | N |
| 31 | Klassen (1998)             | N | N | N | N | Y | Y | Y | Y | U | N | Y | Y | N | Y | N |
| 32 |                            |   |   |   |   |   |   |   |   |   |   |   |   |   |   |   |
| 33 |                            |   |   |   |   |   |   |   |   |   |   |   |   |   |   |   |
| 34 |                            |   |   |   |   |   |   |   |   |   |   |   |   |   |   |   |
| 35 |                            |   |   |   |   |   |   |   |   |   |   |   |   |   |   |   |
| 36 |                            |   |   |   |   |   |   |   |   |   |   |   |   |   |   |   |
| 37 |                            |   |   |   |   |   |   |   |   |   |   |   |   |   |   |   |
| 38 |                            |   |   |   |   |   |   |   |   |   |   |   |   |   |   |   |
| 39 |                            |   |   |   |   |   |   |   |   |   |   |   |   |   |   |   |
| 40 |                            |   |   |   |   |   |   |   |   |   |   |   |   |   |   |   |
| 41 |                            |   |   |   |   |   |   |   |   |   |   |   |   |   |   |   |
| 42 |                            |   |   |   |   |   |   |   |   |   |   |   |   |   |   |   |
| 43 |                            |   |   |   |   |   |   |   |   |   |   |   |   |   |   |   |
| 44 |                            |   |   |   |   |   |   |   |   |   |   |   |   |   |   |   |
| 45 |                            |   |   |   |   |   |   |   |   |   |   |   |   |   |   |   |
| 46 |                            |   |   |   |   |   |   |   |   |   |   |   |   |   |   |   |
| 47 |                            |   |   |   |   |   |   |   |   |   |   |   |   |   |   |   |

1  
2  
3  
4  
5  
6  
7  
8  
9  
10  
11  
12  
13  
14  
15  
16  
17  
18  
19  
20  
21  
22  
23  
24  
25  
26  
27  
28  
29  
30  
31  
32  
33  
34  
35  
36  
37  
38  
39  
40  
41  
42  
43  
44  
45  
46  
47

|                       |   |   |   |   |   |   |   |   |   |   |   |   |   |   |   |   |
|-----------------------|---|---|---|---|---|---|---|---|---|---|---|---|---|---|---|---|
| Kuyucu (2004)         | N | N | N | N | N | N | N | N | N | N | N | Y | N | N | N | N |
| Lai (2005)            | N | N | N | N | Y | N | N | N | Y | Y | Y | N | N | N | Y |   |
| Langton-Hewer (1998)  | N | N | N | N | N | N | N | N | N | N | Y | N | N | Y | N |   |
| Lee (2001)            | N | N | N | Y | Y | N | N | N | Y | N | Y | Y | Y | Y | Y | N |
| Leer (1969)           | N | N | N | N | N | N | N | N | N | N | Y | N | Y | Y | Y | N |
| Lehmann (2008)        | N | N | N | Y | Y | N | N | N | Y | N | Y | Y | Y | Y | Y | N |
| Leipzig (1979)        | N | N | N | N | N | N | N | N | N | N | Y | N | N | N | N | N |
| Lin (1991)            | N | N | N | N | N | N | N | N | N | N | Y | N | N | Y | N |   |
| Lucas-Bouwman (2001)  | N | N | N | N | N | N | N | N | N | N | Y | Y | N | Y | N |   |
| Nahum (2009)          | N | N | N | Y | Y | N | N | N | Y | N | Y | Y | Y | Y | Y | N |
| Paniagua (2017)       | N | N | N | N | Y | N | N | N | N | N | Y | N | N | Y | N |   |
| Panickar (2009)       | N | N | N | N | Y | Y | Y | Y | Y | N | Y | N | N | Y | N |   |
| Panigada (2014)       | N | N | N | N | Y | N | N | N | Y | N | Y | Y | Y | Y | Y | N |
| Plint (2009)          | N | N | N | N | Y | N | Y | Y | Y | N | Y | N | N | Y | N |   |
| Razi (2015)           | N | N | N | N | N | N | N | N | N | N | Y | N | N | N | N |   |
| Roberts (1999)        | N | N | N | N | N | N | N | N | N | N | Y | N | N | Y | N |   |
| Roorda (1998)         | N | N | N | N | N | N | N | N | N | N | Y | N | N | N | N |   |
| Roosevelt (1996)      | N | N | N | N | Y | N | Y | Y | Y | N | Y | N | N | Y | N |   |
| Sadowitz (2012)       | N | N | N | N | Y | Y | N | N | Y | N | Y | Y | Y | Y | Y | N |
| Saito (2017)          | N | N | N | N | Y | N | N | N | N | N | Y | N | N | N | N |   |
| Schuh (2008)          | N | N | N | N | Y | N | Y | Y | Y | Y | Y | N | N | N | N |   |
| Schuh (2009)          | N | N | N | N | N | N | N | N | N | N | Y | Y | N | Y | N |   |
| Siomou (2003)         | Y | N | N | N | Y | N | N | N | Y | U | Y | N | N | N | N |   |
| Sparrow (2006)        | N | N | N | N | N | N | N | N | N | N | Y | N | N | N | N |   |
| Stafford (1998)       | Y | N | N | N | Y | N | N | N | Y | Y | Y | N | N | Y | N |   |
| Storr (1987)          | N | N | N | N | N | N | N | N | N | N | Y | N | N | N | N |   |
| Sumboonnanonda (1997) | N | N | N | N | Y | N | N | N | Y | N | Y | N | N | Y | N |   |

|    |                             |   |   |   |   |   |   |   |   |   |   |   |   |   |   |   |
|----|-----------------------------|---|---|---|---|---|---|---|---|---|---|---|---|---|---|---|
| 1  |                             |   |   |   |   |   |   |   |   |   |   |   |   |   |   |   |
| 2  |                             |   |   |   |   |   |   |   |   |   |   |   |   |   |   |   |
| 3  | Sung (1998)                 | N | N | N | N | Y | Y | Y | Y | N | N | Y | N | N | N | N |
| 4  | Super (1989)                | N | N | N | N | N | N | N | N | N | N | Y | N | N | N | N |
| 5  | Sussman (1964)              | N | N | N | N | Y | N | N | N | N | N | Y | N | N | Y | N |
| 6  | Svedmyr (1995)              | N | N | N | N | N | N | N | N | N | N | Y | N | Y | N | N |
| 7  | Svedmyr (1999) <sup>1</sup> | N | N | N | N | Y | N | Y | N | Y | Y | Y | N | Y | Y | Y |
| 8  | Tagarro (2014)              | N | N | N | N | N | N | N | N | N | N | Y | N | N | Y | N |
| 9  | Tal (1983)                  | N | N | N | Y | N | N | N | N | N | N | Y | N | N | N | N |
| 10 | Tamura (2008)               | N | N | N | N | Y | N | N | N | N | N | Y | N | N | N | N |
| 11 | Teeratakulpisarn (2007)     | N | N | N | N | Y | N | Y | Y | Y | N | Y | N | N | Y | N |
| 12 | van Woensel (1997)          | N | N | N | Y | N | N | N | N | N | N | Y | N | N | N | N |
| 13 | Webb (1986)                 | N | N | N | N | Y | Y | N | N | Y | N | Y | N | N | N | N |
| 14 | Zhang (2003)                | N | N | N | N | Y | N | N | N | N | N | Y | N | N | N | N |

<sup>1</sup> Hedlin 1999 and Svedmyr 1999 are associated publications; the two papers are assessed as one study

N: no; No.: number; U: unsure; Y: yes

## REFERENCES

1. Chou R, Aronson N, Atkins DL, et al. Accessing harms when comparing medication interventions. In: Agency for Healthcare Research and Quality. Methods guide for effectiveness and comparative effectiveness reviews. Rockville, MD; 2008.

1  
2  
3  
4  
5  
6  
7  
8  
9  
10  
11  
12  
13  
14  
15  
16  
17  
18  
19  
20  
21  
22  
23  
24  
25  
26  
27  
28  
29  
30  
31  
32  
33  
34  
35  
36  
37  
38  
39  
40  
41  
42  
43  
44  
45  
46  
47

|                     |                                                               |        |
|---------------------|---------------------------------------------------------------|--------|
| <b>Supplement 5</b> | <b>Effect estimates for all adverse events with subgroups</b> |        |
|                     | a. Infection & respiratory system                             | p. 2-4 |
|                     | b. Gastro-intestinal tract                                    | p. 5-7 |
|                     | c. CNS & behaviour effects                                    | p. 8-9 |
|                     | d. Dermatologic conditions                                    | p. 10  |
|                     | e. Endocrine/ metabolic & musculoskeletal systems             | p. 11  |
|                     | f. Cardiovascular system                                      | p. 12  |
|                     | g. General adverse events/ other symptoms                     | p. 13  |
|                     | h. Immune system & oncology                                   | p. 14  |

The tables below report results of meta-analyses for adverse events, organized by organ systems. Effect estimates were calculated for studies with more than one treatment arm, using risk difference (RD) for all comparative studies and, using Peto odds ratio (pOR) for studies that reported at least one event in at least one treatment arm. Shaded rows indicate all studies contributing to an outcome, for the specified comparison, without subgroup analysis. When data was available, subgroup analyses (non-shaded rows) using study-level data were conducted for dose (single versus multi-dose) and for respiratory condition (e.g., bronchiolitis).

## Supplement 5a. Infection &amp; respiratory system

| Adverse event                     | Comparison 1 vs. Comparison 2 | Subgroup      | No. of studies | Comparison 1 – no. of patients with events/total no. of patients | Comparison 2 – no. of patients with events/total no. of patients | RD (95% CI)         | I <sup>2</sup> (%) | Peto OR (95% CI)  | I <sup>2</sup> (%) |
|-----------------------------------|-------------------------------|---------------|----------------|------------------------------------------------------------------|------------------------------------------------------------------|---------------------|--------------------|-------------------|--------------------|
| Severe infections, overall        | Systemic vs. placebo          |               | 4              | 0/552                                                            | 2/554                                                            | 0.00 (-0.01, 0.00)  | 0                  | 0.15 (0.01, 2.45) | 0                  |
| Severe infections, by dose        | Systemic vs. placebo          | Single dose   | 1              | 0/359                                                            | 1/361                                                            | 0.00 (-0.01, 0.00)  | NA                 | 0.14 (0.00, 6.86) | NA                 |
|                                   | Systemic vs. placebo          | Multi-dose    | 3              | 0/193                                                            | 1/193                                                            | 0.00 (-0.01, 0.01)  | 0                  | 0.17 (0.00, 8.79) | NA                 |
| Severe infections, by condition   | Systemic vs. placebo          | Bronchiolitis | 2              | 0/179                                                            | 0/175                                                            | 0.00 (-0.01, 0.01)  | 0                  | NA                | NA                 |
|                                   | Systemic vs. placebo          | Croup         | 2              | 0/373                                                            | 2/379                                                            | 0.00 (-0.01, 0.00)  | 0                  | 0.15 (0.01, 2.45) | 0                  |
| Severe infections, overall        | Inhaled vs. placebo           |               | 1              | 2/62                                                             | 4/67                                                             | -0.03 (-0.10, 0.04) | NA                 | 0.54 (0.11, 2.77) | NA                 |
| Systemic infections, overall      | Systemic vs. placebo          |               | 4              | 5/1095                                                           | 4/1083                                                           | 0.00 (0.00, 0.00)   | 0                  | 1.26 (0.34, 4.68) | NA                 |
| Systemic infections, by dose      | Systemic vs. placebo          | Single dose   | 2              | 5/664                                                            | 4/656                                                            | 0.00 (-0.01, 0.01)  | 0                  | 1.26 (0.34, 4.68) | NA                 |
|                                   | Systemic vs. placebo          | Multi-dose    | 2              | 0/431                                                            | 0/427                                                            | 0.00 (-0.01, 0.01)  | 0                  | NA                | NA                 |
| Systemic infections, by condition | Systemic vs. placebo          | Bronchiolitis | 2              | 0/705                                                            | 0/695                                                            | 0.00 (0.00, 0.00)   | 0                  | NA                | NA                 |
|                                   | Systemic vs. placebo          | Croup         | 1              | 5/359                                                            | 4/361                                                            | 0.00 (-0.01, 0.02)  | NA                 | 1.26 (0.34, 4.68) | NA                 |
|                                   | Systemic vs. placebo          | Wheeze        | 1              | 0/31                                                             | 0/27                                                             | 0.00 (-0.07, 0.07)  | NA                 | NA                | NA                 |

|                              |                      |                    |   |        |        |                     |    |                     |    |
|------------------------------|----------------------|--------------------|---|--------|--------|---------------------|----|---------------------|----|
| Systemic infections, overall | Inhaled vs. placebo  | Multi-dose, wheeze | 2 | 18/91  | 20/94  | 0.00 (-0.06, 0.06)  | 0  | 0.96 (0.45, 2.05)   | NA |
| Lung/trachea, overall        | Systemic vs. placebo |                    | 7 | 18/955 | 28/928 | -0.01 (-0.02, 0.01) | 37 | 0.61 (0.34, 1.12)   | 0  |
| Lung/trachea, by dose        | Systemic vs. placebo | Single dose        | 5 | 6/793  | 9/761  | 0.00 (-0.01, 0.00)  | 0  | 0.57 (0.20, 1.62)   | 0  |
|                              | Systemic vs. placebo | Multi-dose         | 2 | 12/162 | 19/167 | -0.09 (-0.29, 0.10) | 69 | 0.63 (0.30, 1.33)   | 57 |
| Lung/trachea, by condition   | Systemic vs. placebo | Bronchiolitis      | 3 | 12/542 | 19/529 | -0.02 (-0.05, 0.02) | 61 | 0.61 (0.29, 1.28)   | 30 |
|                              | Systemic vs. placebo | Croup              | 4 | 6/413  | 9/399  | -0.02 (-0.12, 0.07) | 40 | 0.61 (0.21, 1.76)   | 6  |
| Lung/trachea, overall        | Inhaled vs. placebo  | Multi-dose, wheeze | 1 | 13/62  | 10/67  | 0.06 (-0.07, 0.19)  | NA | 1.51 (0.61, 3.70)   | NA |
| URT, overall                 | Systemic vs. placebo |                    | 6 | 9/671  | 7/656  | 0.00 (-0.01, 0.01)  | 0  | 1.21 (0.44, 3.33)   | 0  |
| URT, by dose                 | Systemic vs. placebo | Single dose        | 4 | 1/492  | 1/480  | 0.00 (-0.01, 0.01)  | 0  | 0.46 (0.02, 10.18)  | 0  |
|                              | Systemic vs. placebo | Multi-dose         | 2 | 8/179  | 6/176  | 0.01 (-0.03, 0.05)  | 0  | 1.36 (0.47, 3.96)   | NA |
| URT, by condition            | Systemic vs. placebo | Bronchiolitis      | 1 | 8/148  | 6/149  | 0.01 (-0.03, 0.06)  | NA | 1.36 (0.47, 3.96)   | NA |
| URT, by condition            | Systemic vs. placebo | Croup              | 4 | 1/492  | 1/480  | 0.00 (-0.01, 0.01)  | 0  | 0.46 (0.02, 10.18)  | 0  |
|                              | Systemic vs. placebo | Wheeze             | 1 | 0/31   | 0/27   | 0.00 (-0.07, 0.07)  | NA | NA                  | NA |
| URT, overall                 | Inhaled vs. placebo  |                    | 6 | 24/495 | 24/499 | 0.00 (-0.02, 0.02)  | 0  | 1.03 (0.57, 1.85)   | 21 |
| URT, by dose                 | Inhaled vs. placebo  | Single dose        | 3 | 2/140  | 0/144  | 0.00 (-0.02, 0.03)  | 14 | 7.40 (0.45, 121.47) | NA |
|                              | Inhaled vs. placebo  | Multi-dose         | 3 | 22/355 | 24/355 | -0.01 (-0.04, 0.03) | 0  | 0.93 (0.51, 1.71)   | 0  |



|                                |                      |                |   |        |        |                     |    |                     |    |
|--------------------------------|----------------------|----------------|---|--------|--------|---------------------|----|---------------------|----|
| URT, by condition              | Inhaled vs. placebo  | Croup          | 3 | 2/140  | 0/144  | 0.00 (-0.02, 0.03)  | 14 | 7.40 (0.45, 121.47) | NA |
|                                | Inhaled vs. placebo  | Wheeze         | 3 | 22/355 | 24/355 | -0.01 (-0.04, 0.03) | 0  | 0.93 (0.51, 1.71)   | 0  |
| Voice complaints, overall      | Systemic vs. placebo |                | 1 | 0/31   | 0/27   | 0.00 (-0.07, 0.07)  | NA | NA                  | NA |
| Voice complaints, overall      | Inhaled vs. placebo  | All multi-dose | 4 | 38/343 | 43/337 | -0.01 (-0.10, 0.07) | 64 | 0.85 (0.53, 1.36)   | 73 |
| Voice complaints, by condition | Inhaled vs. placebo  | Asthma         | 2 | 4/50   | 9/49   | -0.08 (-0.46, 0.31) | 90 | 0.39 (0.12, 1.26)   | 81 |
|                                | Inhaled vs. placebo  | Wheeze         | 2 | 34/293 | 34/288 | 0.00 (-0.04, 0.04)  | 0  | 0.99 (0.59, 1.64)   | NA |

RD: risk difference; CI: confidence interval; NA not applicable/estimable; no.: number; Peto OR: Peto odds ratio; URT=upper respiratory tract; vs.: versus

## Supplement 5b. Gastro-intestinal tract

| Adverse event          | Comparison 1 vs. Comparison 2 | Subgroup           | No. of studies | Comparison 1 – no. of patients with events/total no. of patients | Comparison 2 – no. of patients with events/total no. of patients | RD (95% CI)         | I <sup>2</sup> (%) | Peto OR (95% CI)   | I <sup>2</sup> (%) |
|------------------------|-------------------------------|--------------------|----------------|------------------------------------------------------------------|------------------------------------------------------------------|---------------------|--------------------|--------------------|--------------------|
| Bleeding, overall      | Systemic vs. placebo          |                    | 7              | 31/1287                                                          | 31/1262                                                          | 0.00 (0.00, 0.00)   | 0                  | 1.00 (0.60, 1.67)  | 0                  |
| Bleeding, by dose      | Systemic vs. placebo          | Single dose        | 4              | 2/800                                                            | 1/790                                                            | 0.00 (0.00, 0.00)   | 0                  | 1.87 (0.19, 18.27) | NA                 |
|                        | Systemic vs. placebo          | Multi-dose         | 3              | 29/487                                                           | 30/472                                                           | 0.00 (-0.02, 0.02)  | 0                  | 0.96 (0.57, 1.64)  | 0                  |
| Bleeding, by condition | Systemic vs. placebo          | Bronchiolitis      | 5              | 31/881                                                           | 31/852                                                           | 0.00 (-0.01, 0.01)  | 0                  | 1.00 (0.60, 1.67)  | 0                  |
|                        | Systemic vs. placebo          | Croup              | 2              | 0/406                                                            | 0/410                                                            | 0.00 (-0.01, 0.01)  | 0                  | NA                 | NA                 |
| Bleeding, overall      | Inhaled vs. placebo           | Single dose, croup | 1              | 0/48                                                             | 0/49                                                             | 0.00 (-0.04, 0.04)  | NA                 | NA                 | NA                 |
| Vomiting, overall      | Systemic vs. placebo          |                    | 7              | 38/1603                                                          | 34/1573                                                          | 0.00 (0.00, 0.01)   | 0                  | 1.10 (0.69, 1.76)  | 17                 |
| Vomiting, by dose      | Systemic vs. placebo          | Single dose        | 4              | 21/747                                                           | 23/712                                                           | 0.00 (-0.02, 0.01)  | 0                  | 0.87 (0.47, 1.59)  | 24                 |
|                        | Systemic vs. placebo          | Multi-dose         | 3              | 17/856                                                           | 11/861                                                           | 0.00 (-0.01, 0.02)  | 37                 | 1.58 (0.75, 3.36)  | 0                  |
| Vomiting, by condition | Systemic vs. placebo          | Asthma             | 1              | 1/37                                                             | 5/33                                                             | -0.11 (-0.27, 0.06) | 33                 | 0.19 (0.03, 1.02)  | 0                  |
|                        | Systemic vs. placebo          | Bronchiolitis      | 3              | 24/751                                                           | 21/718                                                           | 0.00 (-0.02, 0.02)  | 0                  | 1.12 (0.62, 2.04)  | 0                  |
|                        | Systemic vs. placebo          | Croup              | 1              | 3/359                                                            | 4/361                                                            | 0.00 (-0.02, 0.01)  | NA                 | 0.75 (0.17, 3.34)  | NA                 |

|                         |                                 |                    |   |        |        |                      |    |                     |    |
|-------------------------|---------------------------------|--------------------|---|--------|--------|----------------------|----|---------------------|----|
|                         | Systemic vs. placebo            | Wheeze             | 2 | 10/456 | 4/461  | 0.02 (-0.06, 0.11)   | 87 | 2.55 (0.87, 7.46)   | 0  |
| Vomiting, overall       | Inhaled vs. placebo             |                    | 5 | 28/421 | 28/420 | 0.00 (-0.03, 0.04)   | 0  | 1.00 (0.58, 1.72)   | 0  |
| Vomiting, by dose       | Inhaled vs. placebo             | Single dose        | 1 | 2/25   | 1/25   | 0.04 (-0.09, 0.17)   | NA | 2.00 (0.20, 20.20)  | NA |
|                         | Inhaled vs. placebo             | Multi-dose         | 4 | 26/396 | 27/395 | 0.00 (-0.03, 0.03)   | 0  | 0.96 (0.55, 1.67)   | 0  |
| Vomiting, by condition  | Inhaled vs. placebo             | Asthma             | 1 | 1/28   | 0/27   | 0.04 (-0.06, 0.13)   | NA | 7.13 (0.14, 359.55) | NA |
|                         | Inhaled vs. placebo             | Croup              | 2 | 4/67   | 4/65   | 0.00 (-0.08, 0.08)   | 0  | 0.97 (0.23, 4.00)   | 0  |
|                         | Inhaled vs. placebo             | Wheeze             | 2 | 23/326 | 24/328 | 0.00 (-0.04, 0.04)   | 0  | 0.96 (0.53, 1.74)   | 0  |
| Vomiting, overall       | Dexamethasone vs. other steroid |                    | 6 | 12/663 | 51/710 | -0.06 (-0.09, -0.02) | 58 | 0.29 (0.17, 0.48)   | 0  |
| Vomiting, by dose       | Dexamethasone vs. other steroid | Single dose        | 5 | 6/376  | 39/420 | -0.07 (-0.11, -0.02) | 47 | 0.23 (0.12, 0.42)   | 0  |
|                         | Dexamethasone vs. other steroid | Multi-dose         | 1 | 6/287  | 12/290 | -0.02 (-0.05, -0.01) | NA | 0.51 (0.20, 1.30)   | NA |
| Vomiting, by condition  | Dexamethasone vs. other steroid | Asthma             | 3 | 6/466  | 28/466 | -0.05 (-0.11, 0.00)  | 77 | 0.26 (0.13, 0.52)   | 52 |
|                         | Dexamethasone vs. other steroid | Croup              | 2 | 5/111  | 8/75   | -0.04 (-0.16, 0.08)  | 64 | 0.46 (0.14, 1.45)   | 0  |
|                         | Dexamethasone vs. other steroid | Other conditions   | 1 | 1/86   | 15/169 | -0.08 (-0.13, -0.02) | 3  | 0.25 (0.09, 0.72)   | 0  |
| Abdominal pain, overall | Systemic vs. placebo            | Single dose, croup | 1 | 1/359  | 1/361  | 0.00 (-0.01, 0.01)   | NA | 1.01 (0.06, 16.11)  | NA |
| Abdominal pain, overall | Dexamethasone vs. other steroid |                    | 3 | 29/188 | 48/264 | -0.01 (-0.07, 0.05)  | 0  | 0.96 (0.57, 1.61)   | 0  |

|                              |                                 |                    |   |        |        |                     |    |                   |    |
|------------------------------|---------------------------------|--------------------|---|--------|--------|---------------------|----|-------------------|----|
| Abdominal pain, by condition | Dexamethasone vs. other steroid | Asthma             | 1 | 2/56   | 3/54   | -0.02 (-0.10, 0.06) | NA | 0.64 (0.11, 3.79) | NA |
|                              |                                 | Croup              | 1 | 9/46   | 7/41   | 0.02 (-0.14, 0.19)  | NA | 1.18 (0.40, 3.47) | NA |
|                              |                                 | Other conditions   | 1 | 18/86  | 38/169 | -0.01 (-0.12, 0.10) | 0  | 0.94 (0.50, 1.77) | 0  |
| Diarrhea, overall            | Systemic vs. placebo            |                    | 3 | 10/254 | 9/230  | 0.01 (-0.03, 0.04)  | 0  | 1.09 (0.43, 2.73) | 0  |
| Diarrhea, by dose            | Systemic vs. placebo            | Single dose        | 1 | 3/89   | 3/85   | 0.00 (-0.06, 0.05)  | NA | 0.95 (0.19, 4.84) | NA |
|                              | Systemic vs. placebo            | Multi-dose         | 2 | 7/165  | 6/145  | 0.01 (-0.03, 0.05)  | 0  | 1.16 (0.38, 3.54) | 0  |
| Diarrhea, by condition       | Systemic vs. placebo            | Bronchiolitis      | 1 | 3/89   | 3/85   | 0.00 (-0.06, 0.05)  | NA | 0.95 (0.19, 4.84) | NA |
|                              | Systemic vs. placebo            | Wheeze             | 2 | 7/165  | 6/145  | 0.01 (-0.03, 0.05)  | 0  | 1.16 (0.38, 3.54) | 0  |
| Diarrhea, overall            | Inhaled vs. placebo             | Multi-dose, wheeze | 2 | 41/326 | 46/328 | -0.01 (-0.09, 0.08) | 37 | 0.89 (0.57, 1.40) | 44 |

RD: risk difference; CI: confidence interval; NA: not applicable/estimable; no.: number; Peto OR: Peto odds ratio; vs.: versus

## Supplement 5c. CNS &amp; behavior effects

| Adverse event                    | Comparison 1 vs. Comparison 2   | Subgroup           | No. of studies | Comparison 1 – no. of patients with events/total no. of patients | Comparison 2 – no. of patients with events/total no. of patients | RD (95% CI)         | I <sup>2</sup> (%) | Peto OR (95% CI)    | I <sup>2</sup> (%) |
|----------------------------------|---------------------------------|--------------------|----------------|------------------------------------------------------------------|------------------------------------------------------------------|---------------------|--------------------|---------------------|--------------------|
| Tremor/jitteriness, overall      | Systemic vs. placebo            |                    | 5              | 22/559                                                           | 14/508                                                           | 0.01 (-0.01, 0.03)  | 0                  | 1.44 (0.71, 2.92)   | 0                  |
| Tremor/jitteriness, by dose      | Systemic vs. placebo            | Single dose        | 2              | 9/83                                                             | 7/56                                                             | 0.00 (-0.08, 0.08)  | 0                  | 1.15 (0.36, 3.66)   | 0                  |
|                                  | Systemic vs. placebo            | Multi-dose         | 3              | 13/476                                                           | 7/452                                                            | 0.01 (-0.01, 0.03)  | 0                  | 1.65 (0.67, 4.02)   | 0                  |
| Tremor/jitteriness, by condition | Systemic vs. placebo            | Asthma             | 1              | 9/37                                                             | 7/33                                                             | 0.01 (-0.16, 0.18)  | 0                  | 1.15 (0.36, 3.66)   | 0                  |
|                                  |                                 | Bronchiolitis      | 3              | 10/470                                                           | 6/447                                                            | 0.01 (-0.01, 0.03)  | 0                  | 1.66 (0.62, 4.46)   | 0                  |
|                                  |                                 | Wheeze             | 1              | 3/52                                                             | 1/28                                                             | 0.02 (-0.07, 0.12)  | NA                 | 1.58 (0.19, 12.83)  | NA                 |
| Tremor/jitteriness, overall      | Dexamethasone vs. other steroid | Single dose, croup | 1              | 1/46                                                             | 0/41                                                             | 0.02 (-0.04, 0.08)  | NA                 | 6.63 (0.13, 336.21) | NA                 |
| Behaviour change, overall        | Systemic vs. placebo            |                    | 4              | 7/588                                                            | 3/571                                                            | 0.00 (-0.01, 0.02)  | 19                 | 1.95 (0.55, 6.92)   | 0                  |
| Behaviour change, by dose        | Systemic vs. placebo            | Single dose        | 2              | 1/423                                                            | 1/426                                                            | 0.00 (-0.01, 0.01)  | 0                  | 1.01 (0.06, 16.11)  | NA                 |
|                                  | Systemic vs. placebo            | Multi-dose         | 2              | 6/165                                                            | 2/145                                                            | 0.02 (-0.02, 0.06)  | 11                 | 2.32 (0.56, 9.64)   | 0                  |
| Behaviour change, by condition   | Systemic vs. placebo            | Croup              | 2              | 1/423                                                            | 1/426                                                            | 0.00 (-0.01, 0.01)  | 0                  | 1.01 (0.06, 16.11)  | NA                 |
|                                  | Systemic vs. placebo            | Wheeze             | 2              | 6/165                                                            | 2/145                                                            | 0.02 (-0.02, 0.06)  | 11                 | 2.32 (0.56, 9.64)   | 0                  |
| Behaviour change, overall        | Inhaled vs. placebo             |                    | 3              | 6/134                                                            | 7/135                                                            | -0.01 (-0.04, 0.03) | 0                  | 0.81 (0.26, 2.54)   | 0                  |

|                                |                                 |                     |   |       |       |                     |    |                     |    |
|--------------------------------|---------------------------------|---------------------|---|-------|-------|---------------------|----|---------------------|----|
| Behaviour change, by dose      | Inhaled vs. placebo             | Single dose         | 1 | 0/64  | 1/68  | -0.01 (-0.06, 0.03) | NA | 0.14 (0.00, 7.25)   | NA |
|                                | Inhaled vs. placebo             | Multi-dose          | 2 | 6/70  | 6/67  | 0.02 (-0.06, 0.10)  | 0  | 0.95 (0.28, 3.15)   | 11 |
| Behaviour change, by condition | Inhaled vs. placebo             | Asthma              | 1 | 1/28  | 0/27  | 0.04 (-0.06, 0.13)  | NA | 7.13 (0.14, 359.55) | NA |
|                                | Inhaled vs. placebo             | Croup               | 2 | 5/106 | 7/108 | -0.02 (-0.05, 0.02) | 0  | 0.66 (0.20, 2.18)   | 0  |
| Behaviour change, overall      | Dexamethasone vs. other steroid | All single dose     | 2 | 35/60 | 38/57 | -0.08 (-0.25, 0.09) | 0  | 0.73 (0.34, 1.56)   | 0  |
| Behaviour change, by condition | Dexamethasone vs. other steroid | Asthma              | 1 | 10/14 | 14/16 | -0.16 (-0.45, 0.13) | NA | 0.38 (0.06, 2.21)   | NA |
|                                | Dexamethasone vs. other steroid | Croup               | 1 | 25/46 | 24/41 | -0.04 (-0.25, 0.17) | NA | 0.85 (0.36, 1.97)   | NA |
| Headache, overall              | Systemic vs. placebo            | Single dose, asthma | 1 | 0/37  | 1/33  | -0.02 (-0.10, 0.07) | 0  | 0.11 (0.00, 5.68)   | NA |
| Headache, overall              | Dexamethasone vs. other steroid | All single dose     | 2 | 7/102 | 4/95  | 0.02 (-0.08, 0.11)  | 51 | 1.63 (0.46, 5.74)   | NA |
| Headache, by condition         | Dexamethasone vs. other steroid | Asthma              | 1 | 0/56  | 0/54  | 0.00 (-0.03, 0.03)  | NA | NA                  | NA |
|                                |                                 | Croup               | 1 | 7/46  | 4/41  | 0.05 (-0.08, 0.19)  | NA | 1.63 (0.46, 5.74)   | NA |

RD: risk difference; CI: confidence interval; NA: not applicable/estimable; no.: number; Peto OR: Peto odds ratio; vs.: versus

## Supplement 5d. Dermatologic conditions

| Adverse event            | Comparison 1 vs. Comparison 2   | Subgroup            | No. of studies | Comparison 1 – no. of patients with events/total no. of patients | Comparison 2 – no. of patients with events/total no. of patients | RD (95% CI)         | I <sup>2</sup> (%) | Peto OR (95% CI)    | I <sup>2</sup> (%) |
|--------------------------|---------------------------------|---------------------|----------------|------------------------------------------------------------------|------------------------------------------------------------------|---------------------|--------------------|---------------------|--------------------|
| Burn, overall            | Inhaled vs. placebo             | Single dose, croup  | 1              | 0/27                                                             | 1/27                                                             | -0.04 (-0.13, 0.06) | NA                 | 0.14 (0.00, 6.82)   | NA                 |
| Integument, overall      | Systemic vs. placebo            |                     | 3              | 4/536                                                            | 0/543                                                            | 0.01 (0.00, 0.01)   | 0                  | 7.59 (1.07, 54.01)  | 0                  |
| Integument, by dose      | Systemic vs. placebo            | Single dose         | 2              | 2/423                                                            | 0/426                                                            | 0.01 (0.00, 0.01)   | 0                  | 7.45 (0.47, 119.36) | NA                 |
|                          | Systemic vs. placebo            | Multi-dose          | 1              | 2/133                                                            | 0/117                                                            | 0.02 (-0.01, 0.05)  | NA                 | 7.72 (0.48, 124.29) | NA                 |
| Integument, by condition | Systemic vs. placebo            | Croup               | 2              | 2/423                                                            | 0/426                                                            | 0.01 (0.00, 0.01)   | 0                  | 7.45 (0.47, 119.36) | NA                 |
|                          | Systemic vs. placebo            | Wheeze              | 1              | 2/113                                                            | 0/117                                                            | 0.02 (-0.01, 0.05)  | NA                 | 7.72 (0.48, 124.29) | NA                 |
| Integument, overall      | Inhaled vs. placebo             |                     | 4              | 24/432                                                           | 27/436                                                           | -0.01 (-0.04, 0.02) | 11                 | 0.88 (0.50, 1.56)   | 37                 |
| Integument, by dose      | Inhaled vs. placebo             | Single dose         | 1              | 0/64                                                             | 1/68                                                             | -0.01 (-0.06, 0.03) | NA                 | 0.14 (0.00, 7.25)   | NA                 |
|                          | Inhaled vs. placebo             | Multi-dose          | 3              | 24/368                                                           | 26/368                                                           | -0.01 (-0.05, 0.04) | 38                 | 0.92 (0.52, 1.63)   | 49                 |
| Integument, by condition | Inhaled vs. placebo             | Croup               | 2              | 0/106                                                            | 3/108                                                            | -0.02 (-0.06, 0.01) | 0                  | 0.13 (0.01, 1.27)   | 0                  |
|                          | Inhaled vs. placebo             | Wheeze              | 2              | 24/326                                                           | 24/328                                                           | 0.01 (-0.05, 0.07)  | 46                 | 1.00 (0.56, 1.80)   | 47                 |
| Phlebitis, overall       | Dexamethasone vs. other steroid | Single dose, asthma | 1              | 0/15                                                             | 0/17                                                             | 0.00 (-0.11, 0.11)  | NA                 | NA                  | NA                 |

RD: risk difference; CI: confidence interval; NA: not applicable/estimable; no.: number; Peto OR: Peto odds ratio; vs.: versus

## Supplement 5e. Endocrine/metabolic &amp; musculoskeletal systems

| Adverse event                                   | Comparison 1 vs. Comparison 2   | Subgroup                  | No. of studies | Comparison 1 – no. of patients with events/total no. of patients | Comparison 2 – no. of patients with events/total no. of patients | RD (95% CI)         | I <sup>2</sup> (%) | Peto OR (95% CI)    | I <sup>2</sup> (%) |
|-------------------------------------------------|---------------------------------|---------------------------|----------------|------------------------------------------------------------------|------------------------------------------------------------------|---------------------|--------------------|---------------------|--------------------|
| Fluid & electrolyte abnormalities, overall      | Systemic vs. placebo            |                           | 4              | 5/832                                                            | 1/818                                                            | 0.00 (0.00, 0.01)   | 0                  | 3.08 (0.60, 15.94)  | 0                  |
| Fluid & electrolyte abnormalities, by dose      | Systemic vs. placebo            | Single dose               | 1              | 1/359                                                            | 0/361                                                            | 0.00 (0.00, 0.01)   | NA                 | 7.43 (0.15, 374.47) | NA                 |
|                                                 | Systemic vs. placebo            | Multi-dose                | 3              | 4/473                                                            | 1/457                                                            | 0.00 (-0.01, 0.01)  | 0                  | 2.56 (0.42, 15.61)  | 0                  |
| Fluid & electrolyte abnormalities, by condition | Systemic vs. placebo            | Bronchiolitis             | 2              | 4/448                                                            | 1/432                                                            | 0.00 (-0.01, 0.01)  | 0                  | 2.56 (0.42, 15.61)  | 0                  |
|                                                 | Systemic vs. placebo            | Croup                     | 2              | 1/384                                                            | 0/386                                                            | 0.00 (0.00, 0.01)   | 0                  | 7.43 (0.15, 374.47) | NA                 |
| Fluid & electrolyte abnormalities, overall      | Dexamethasone vs. other steroid | Multi-dose, bronchiolitis | 1              | 1/33                                                             | 2/15                                                             | -0.10 (-0.28, 0.08) | NA                 | 0.18 (0.01, 2.17)   | NA                 |
| Adrenal suppression, overall                    | Inhaled vs. placebo             | Multi-dose, asthma        | 1              | 5/6                                                              | 4/10                                                             | 0.43 (0.01, 0.86)   | NA                 | 5.21 (0.72, 37.57)  | NA                 |

RD: risk difference; CI: confidence interval; NA: not applicable/estimable; no.: number; Peto OR: Peto odds ratio; vs.: versus

| Adverse event | Comparison 1 vs. Comparison 2 | Subgroup           | No. of studies | Comparison 1 – total no. of patients | Comparison 2 – total no. of patients | Mean Difference (95% CI) | I <sup>2</sup> (%) |
|---------------|-------------------------------|--------------------|----------------|--------------------------------------|--------------------------------------|--------------------------|--------------------|
| Linear growth | Inhaled vs. placebo           | Multi-dose, wheeze | 2              | 154                                  | 109                                  | 0.10 (-0.47, 0.67)       | 9                  |

CI: confidence interval; no.: number; vs.: versus



## Supplement 5f. Cardiovascular system

| Adverse event                     | Comparison 1 vs. Comparison 2   | Subgroup            | No. of studies | Comparison 1 – no. of patients with events/total no. of patients | Comparison 2 – no. of patients with events/total no. of patients | RD (95% CI)        | I <sup>2</sup> (%) | Peto OR (95% CI)   | I <sup>2</sup> (%) |
|-----------------------------------|---------------------------------|---------------------|----------------|------------------------------------------------------------------|------------------------------------------------------------------|--------------------|--------------------|--------------------|--------------------|
| Arrhythmia, overall               | Systemic vs. placebo            | Multi-dose, wheeze  | 1              | 0/31                                                             | 0/27                                                             | 0.00 (-0.07, 0.07) | NA                 | NA                 | NA                 |
| Arrhythmia, overall               | Inhaled vs. placebo             | Multi-dose, wheeze  | 1              | 0/29                                                             | 0/27                                                             | 0.00 (-0.07, 0.07) | NA                 | NA                 | NA                 |
| Arrhythmia, overall               | Dexamethasone vs. other steroid | Multi-dose, asthma  | 1              | 0/56                                                             | 0/54                                                             | 0.00 (-0.03, 0.03) | NA                 | NA                 | NA                 |
| Hypertension, overall             | Systemic vs. placebo            | All bronchiolitis   | 3              | 1/727                                                            | 1/714                                                            | 0.00 (-0.01, 0.01) | 0                  | 1.00 (0.06, 15.99) | 50                 |
| Hypertension, by dose             | Systemic vs. placebo            | Single dose         | 1              | 0/305                                                            | 0/295                                                            | 0.00 (-0.01, 0.01) | NA                 | NA                 | NA                 |
|                                   | Systemic vs. placebo            | Multi-dose          | 2              | 1/422                                                            | 1/419                                                            | 0.00 (-0.01, 0.01) | 0                  | 1.00 (0.06, 15.99) | 50                 |
| Hypertension, overall             | Dexamethasone vs. other steroid | Single dose, asthma | 1              | 0/15                                                             | 0/17                                                             | 0.00 (-0.11, 0.11) | NA                 | NA                 | NA                 |
| Congestive heart failure, overall | Systemic vs. placebo            | Multi-dose, croup   | 1              | 0/25                                                             | 0/25                                                             | 0.00 (-0.07, 0.07) | NA                 | NA                 | NA                 |

RD: risk difference; CI: confidence interval; NA: not applicable/estimable; no.: number; Peto OR: Peto odds ratio; vs.: versus

## Supplement 5g. General adverse events/ other symptoms

| Adverse event                             | Comparison 1 vs. Comparison 2   | Subgroup          | No. of studies | Comparison 1 – no. of patients with events/total no. of patients | Comparison 2 – no. of patients with events/total no. of patients | RD (95% CI)         | I <sup>2</sup> (%) | Peto OR (95% CI)  | I <sup>2</sup> (%) |
|-------------------------------------------|---------------------------------|-------------------|----------------|------------------------------------------------------------------|------------------------------------------------------------------|---------------------|--------------------|-------------------|--------------------|
| General complaints <sup>1</sup> , overall | Systemic vs. placebo            | All bronchiolitis | 2              | 38/446                                                           | 38/423                                                           | 0.00 (-0.04, 0.04)  | 0                  | 1.00 (0.62, 1.60) | 0                  |
| General complaints, by dose               | Systemic vs. placebo            | Single dose       | 1              | 0/46                                                             | 0/23                                                             | 0.00 (-0.09, 0.09)  | 0                  | NA                | NA                 |
|                                           | Systemic vs. placebo            | Multi-dose        | 1              | 38/400                                                           | 38/400                                                           | 0.00 (-0.04, 0.04)  | 0                  | 1.00 (0.62, 1.60) | 0                  |
| General complaints <sup>2</sup> , overall | Dexamethasone vs. other steroid |                   | 2              | 3/102                                                            | 3/95                                                             | -0.01 (-0.06, 0.03) | 0                  | 0.90 (0.18, 4.61) | 11                 |
| General complaints, by condition          | Dexamethasone vs. other steroid | Asthma            | 1              | 0/56                                                             | 1/54                                                             | -0.02 (-0.07, 0.03) | NA                 | 0.13 (0.00, 6.58) | NA                 |
|                                           | Dexamethasone vs. other steroid | Croup             | 1              | 3/46                                                             | 2/41                                                             | 0.01 (-0.08, 0.11)  | NA                 | 1.29 (0.21, 7.81) | NA                 |

<sup>1</sup>Two studies reported pallor

<sup>2</sup>One study reported excessive urination; one study reported dizziness

RD: risk difference; CI: confidence interval; NA: not applicable/estimable; no.: number; Peto OR: Peto odds ratio; vs.: versus

## Supplement 5h. Immune system &amp; oncology

| Adverse event              | Comparison 1<br>vs.<br>Comparison 2 | Subgroup | No.<br>of<br>studies | Comparison<br>1 –no.# of<br>patients<br>with<br>events/total<br>no. of<br>patients | Comparison<br>2 – no. of<br>patients<br>with<br>events/total<br>no. of<br>patients | RD<br>(95% CI)     | I <sup>2</sup><br>(%) | Peto OR<br>(95% CI) | I <sup>2</sup><br>(%) |
|----------------------------|-------------------------------------|----------|----------------------|------------------------------------------------------------------------------------|------------------------------------------------------------------------------------|--------------------|-----------------------|---------------------|-----------------------|
| Immunosuppression, overall | Systemic vs. placebo                |          | 1                    | 0/47                                                                               | 0/48                                                                               | 0.00 (-0.04, 0.04) | NA                    | NA                  | NA                    |

RD: risk difference; CI: confidence interval; NA: not applicable/estimable; no.: number; Peto OR: Peto odds ratio; vs.: versus

|    |                     |                                                         |
|----|---------------------|---------------------------------------------------------|
| 1  |                     |                                                         |
| 2  |                     |                                                         |
| 3  | <b>Supplement 6</b> | <b>Forest plots of adverse events</b>                   |
| 4  |                     |                                                         |
| 5  |                     | Systemic vs. Placebo                                    |
| 6  | a.                  | Infection & respiratory system p. 2-12                  |
| 7  | b.                  | Gastro-intestinal tract p. 13-22                        |
| 8  | c.                  | CNS & behaviour effects p. 23-29                        |
| 9  | d.                  | Dermatologic conditions p. 30-32                        |
| 10 | e.                  | Endocrine/ metabolic & musculoskeletal systems p. 33-35 |
| 11 | f.                  | Cardiovascular system p. 36-38                          |
| 12 | g.                  | General adverse events/ other symptoms p. 39-40         |
| 13 | h.                  | Immune system & oncology p. 41                          |
| 14 |                     |                                                         |
| 15 |                     | Inhaled vs. Placebo                                     |
| 16 | a.                  | Infection & respiratory system p. 42-47                 |
| 17 | b.                  | Gastro-intestinal tract p. 48-51                        |
| 18 | c.                  | CNS & behaviour effects p. 52-54                        |
| 19 | d.                  | Dermatologic conditions p. 55-57                        |
| 20 | e.                  | Endocrine/ metabolic & musculoskeletal systems p. 58    |
| 21 | f.                  | Cardiovascular system p. 59                             |
| 22 |                     |                                                         |
| 23 |                     | Dexamethasone vs. Other steroid                         |
| 24 | a.                  | Gastro-intestinal tract p. 60-63                        |
| 25 | b.                  | CNS & behaviour effects p. 64-66                        |
| 26 | c.                  | Dermatologic conditions p. 67                           |
| 27 | d.                  | Endocrine/ metabolic & musculoskeletal systems p. 68    |
| 28 | e.                  | Cardiovascular system p. 69                             |
| 29 | f.                  | General adverse events/ other symptoms p. 70-71         |
| 30 |                     |                                                         |
| 31 |                     |                                                         |
| 32 |                     |                                                         |
| 33 |                     |                                                         |
| 34 |                     |                                                         |
| 35 |                     |                                                         |
| 36 |                     |                                                         |
| 37 |                     |                                                         |
| 38 |                     |                                                         |
| 39 |                     |                                                         |
| 40 |                     |                                                         |
| 41 |                     |                                                         |
| 42 |                     |                                                         |
| 43 |                     |                                                         |
| 44 |                     |                                                         |
| 45 |                     |                                                         |
| 46 |                     |                                                         |
| 47 |                     |                                                         |
| 48 |                     |                                                         |
| 49 |                     |                                                         |
| 50 |                     |                                                         |
| 51 |                     |                                                         |
| 52 |                     |                                                         |
| 53 |                     |                                                         |
| 54 |                     |                                                         |
| 55 |                     |                                                         |
| 56 |                     |                                                         |
| 57 |                     |                                                         |
| 58 |                     |                                                         |
| 59 |                     |                                                         |
| 60 |                     |                                                         |

**SYSTEMIC vs. PLACEBO – Infection & Respiratory**

**Severe infections**

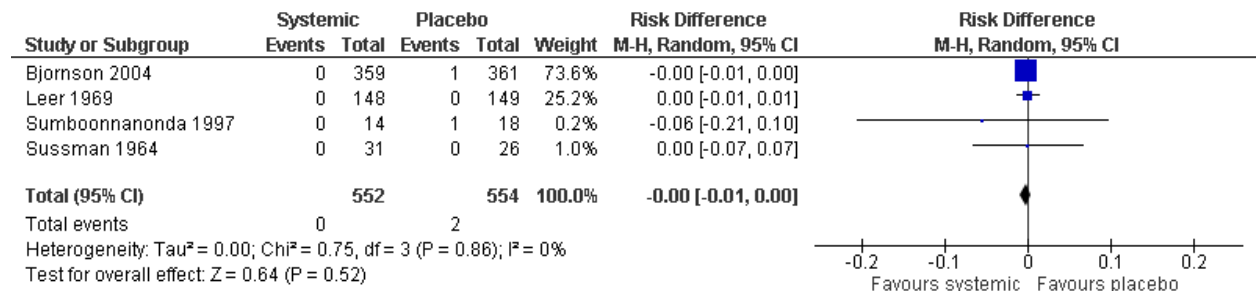

**Severe infections – Peto**

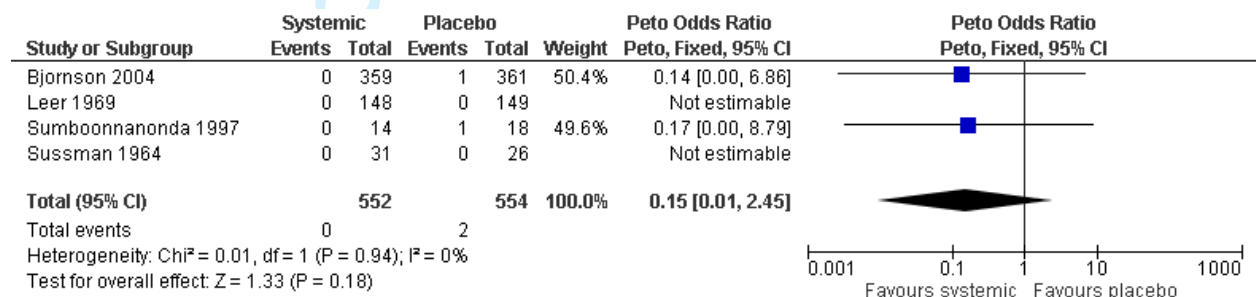

**Severe infections (by dose)**

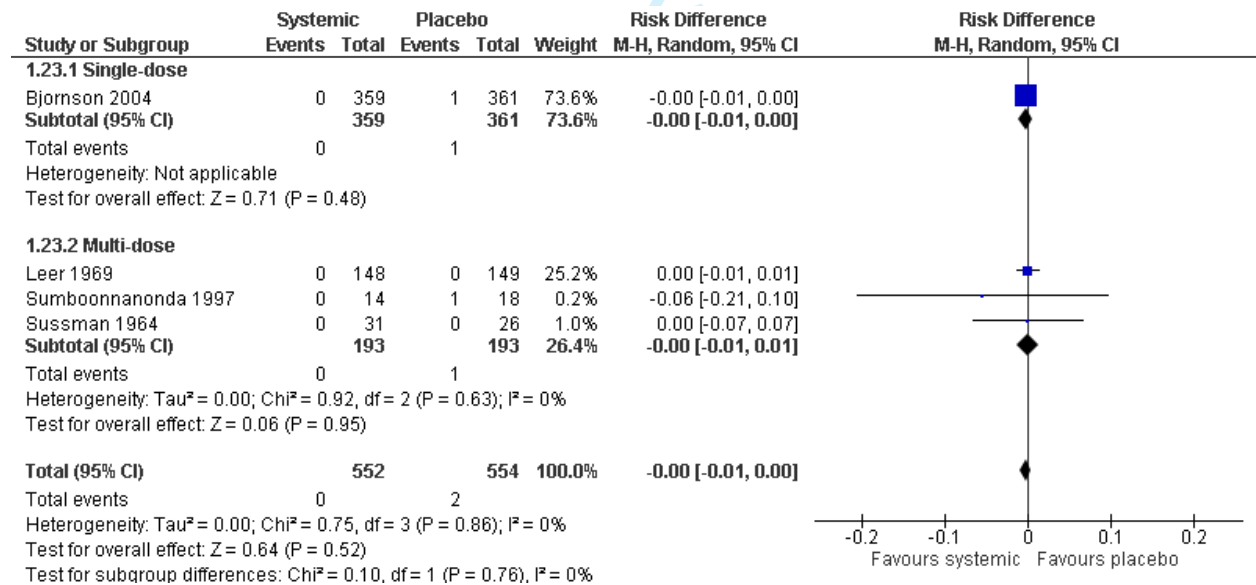

## Severe infections (by dose) – Peto

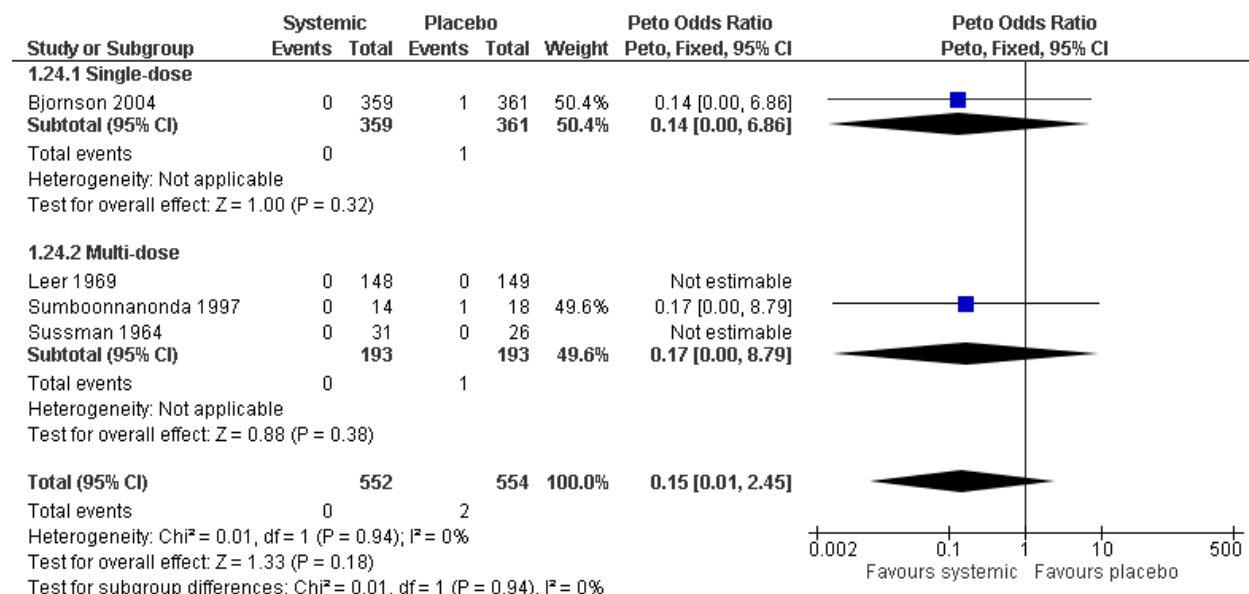

## Severe infections (by condition)

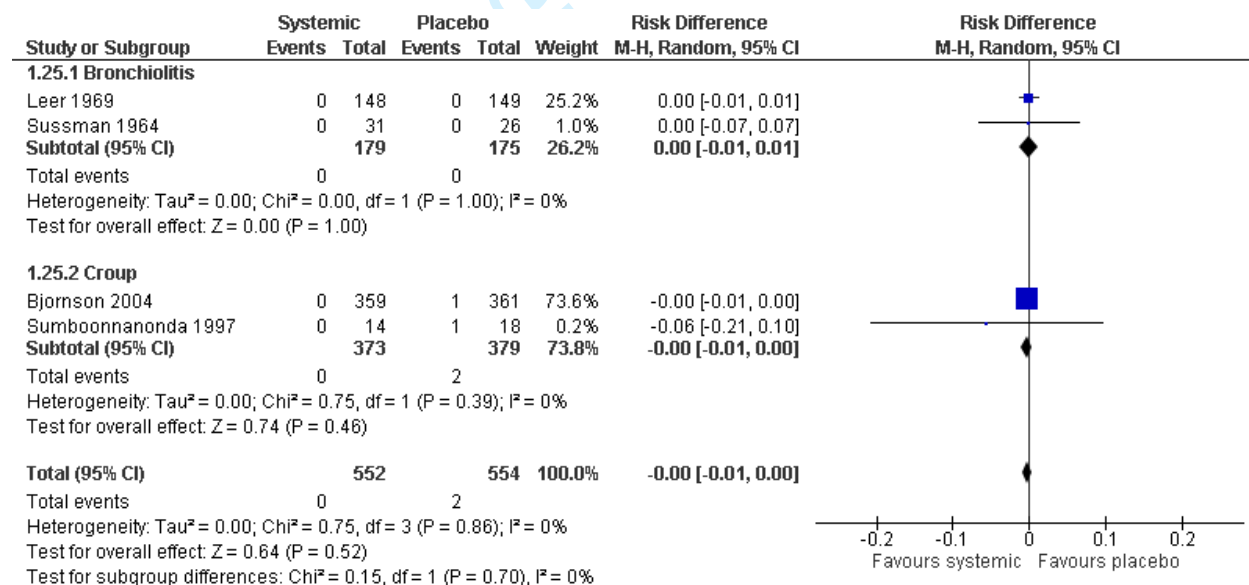

Severe infections (by condition) – Peto

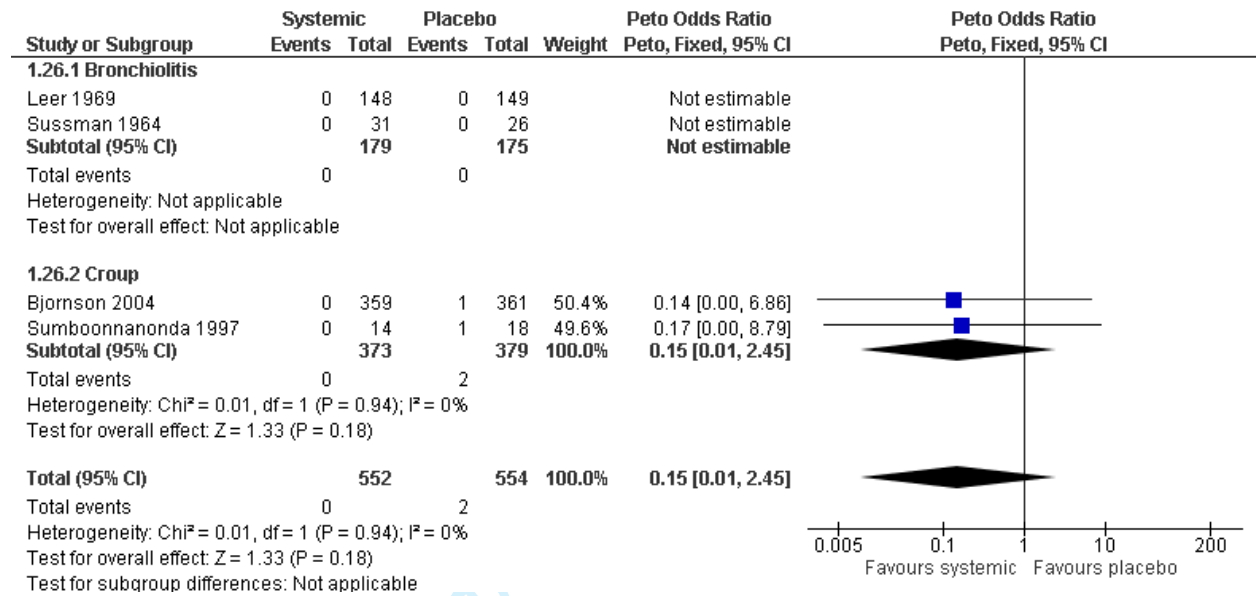

Systemic infections

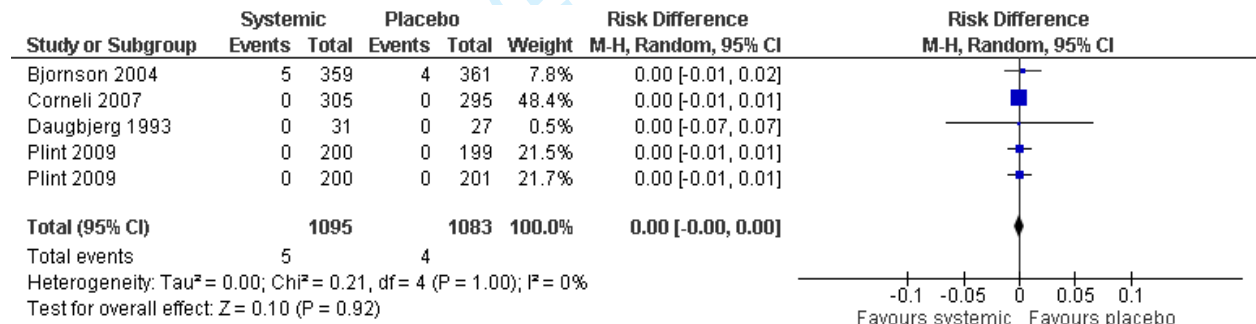

Systemic infections – Peto

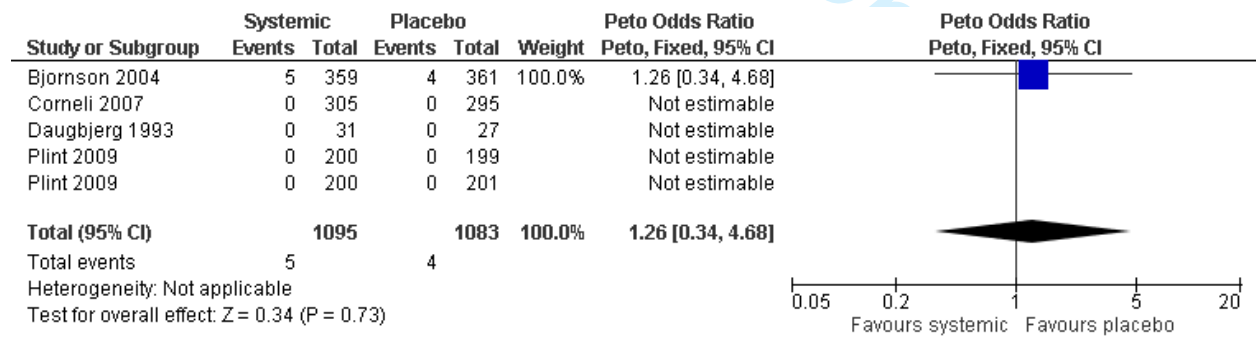

Systemic infections (by dose)

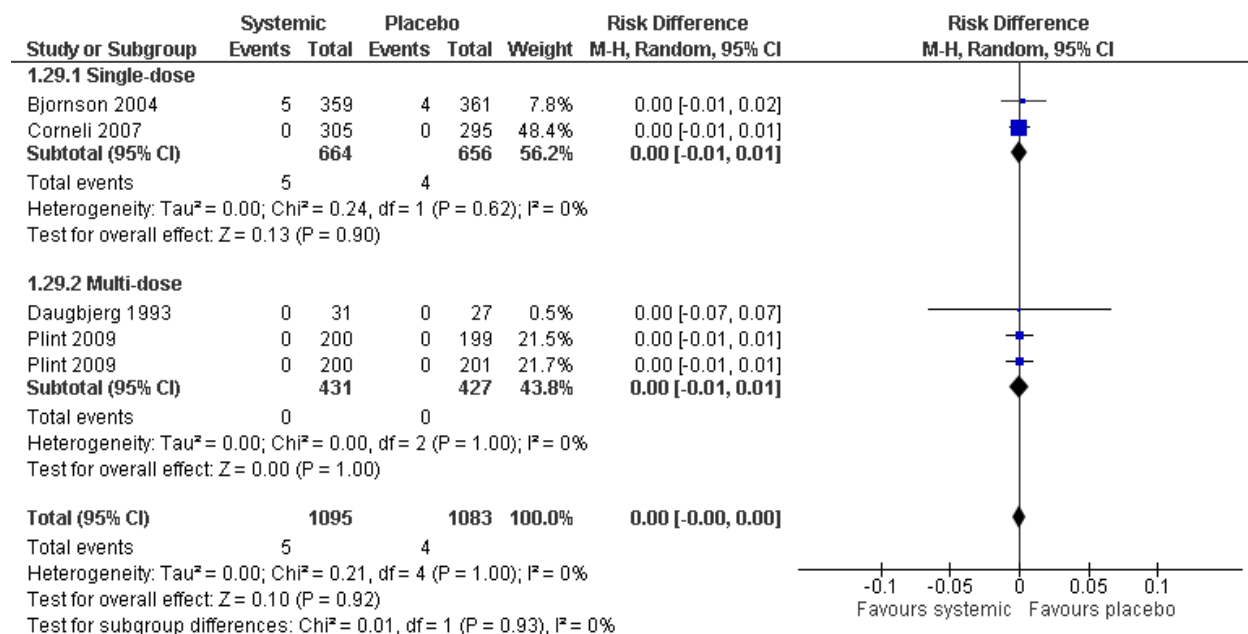

Systemic infections (by dose) – Peto

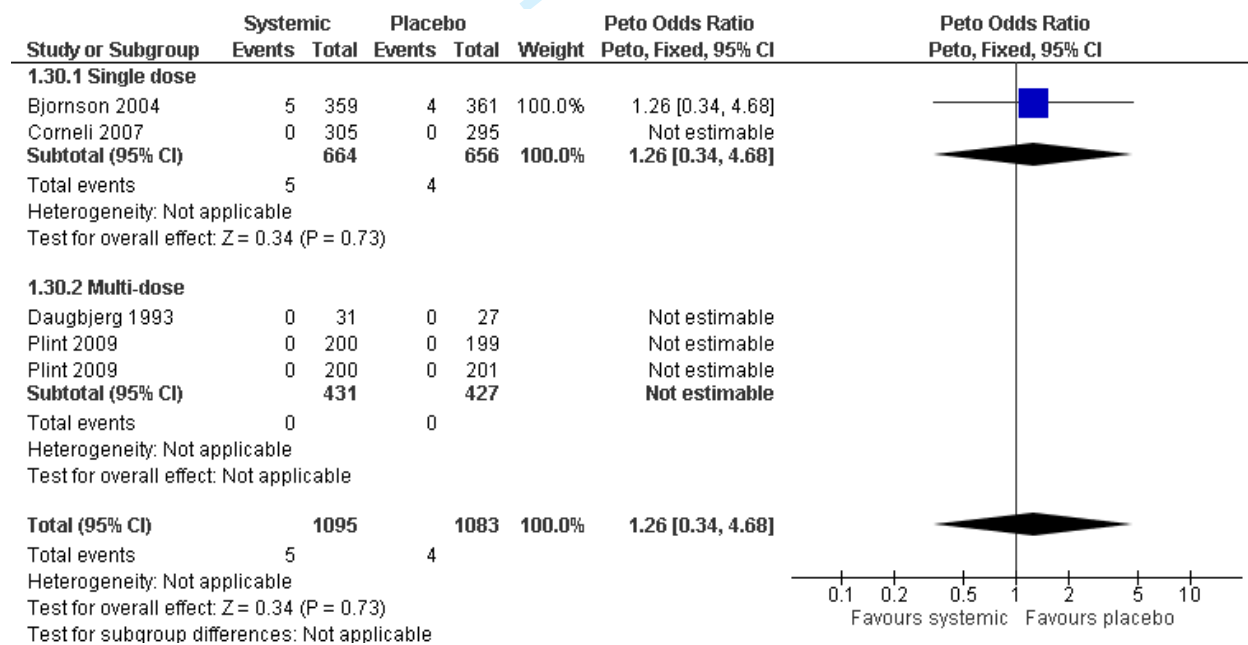



Systemic infections (by condition)

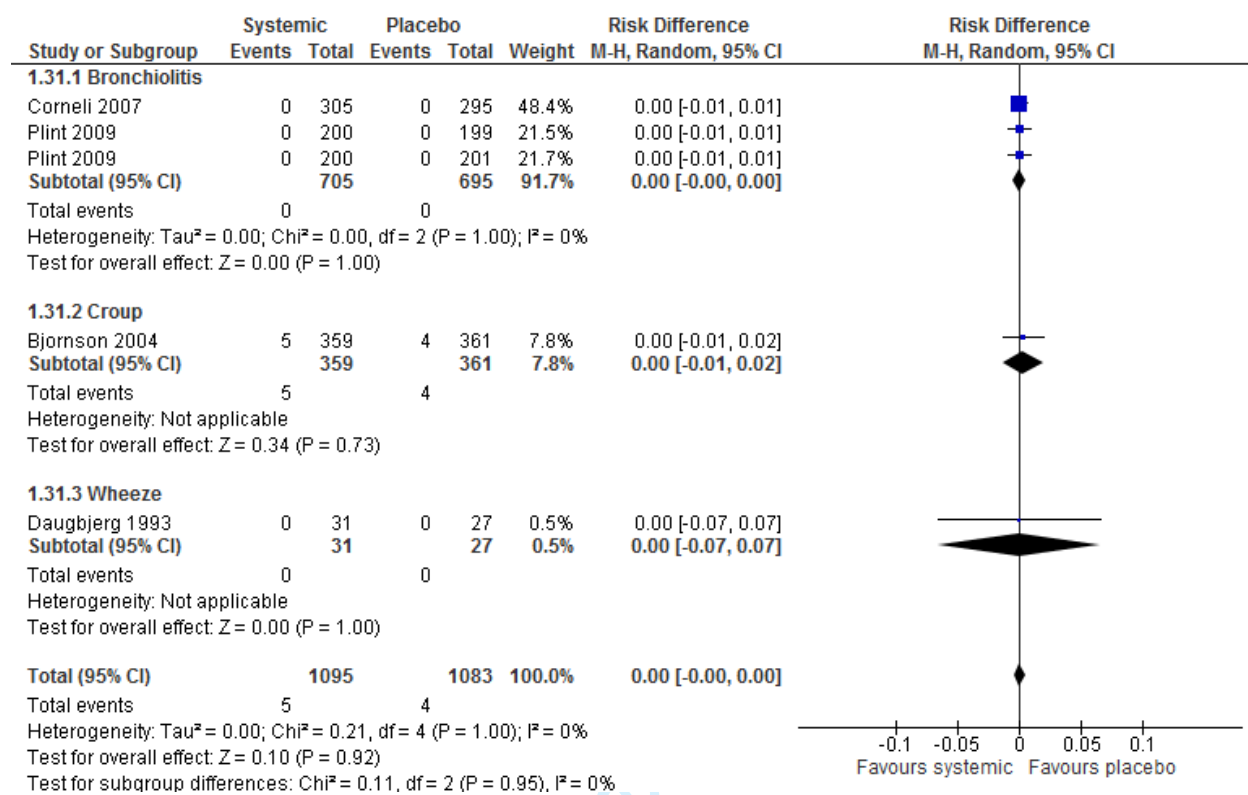

Systemic infections (by condition) – Peto

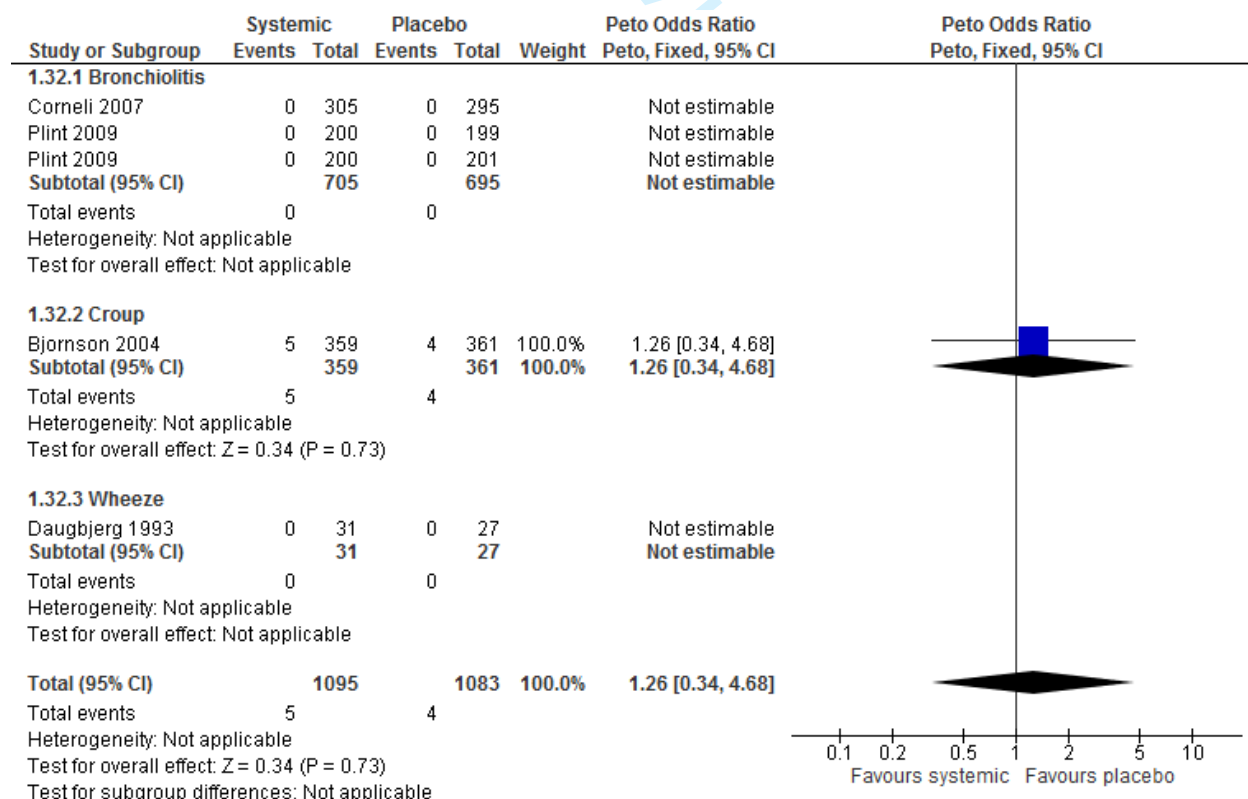

Lung/trachea

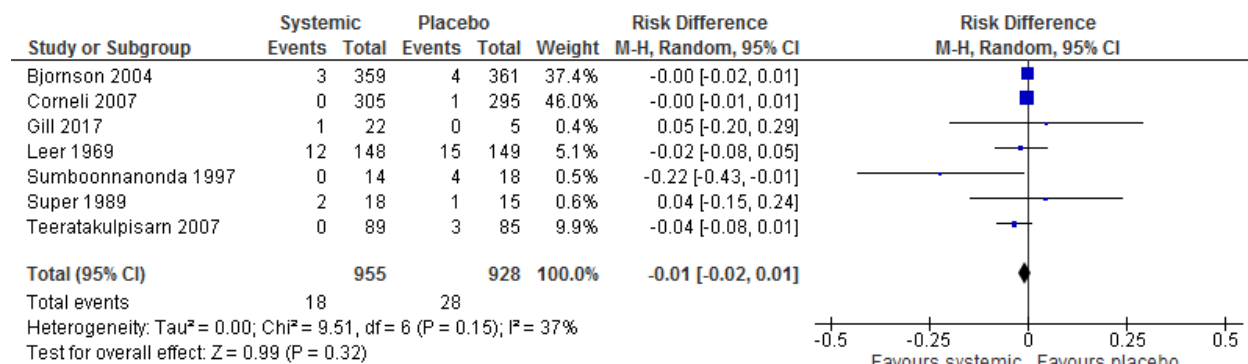

Lung/trachea – Peto

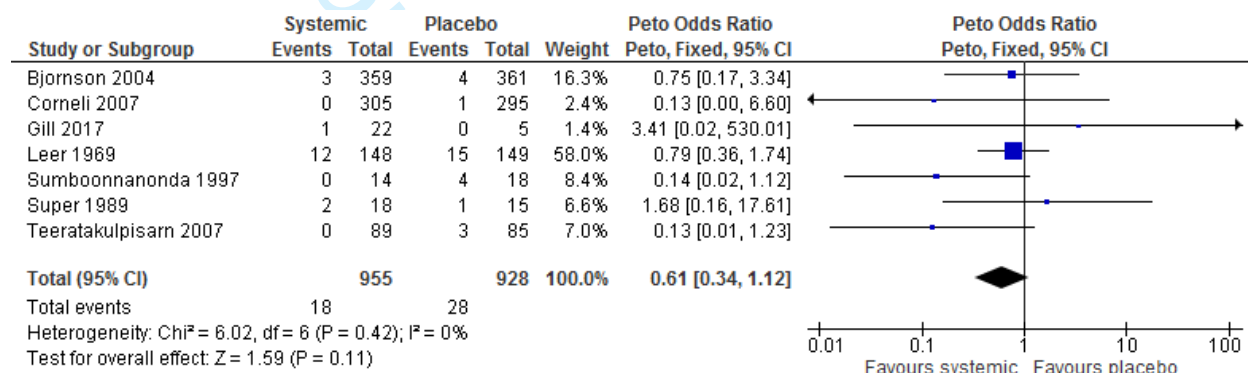

Lung/trachea (by dose)

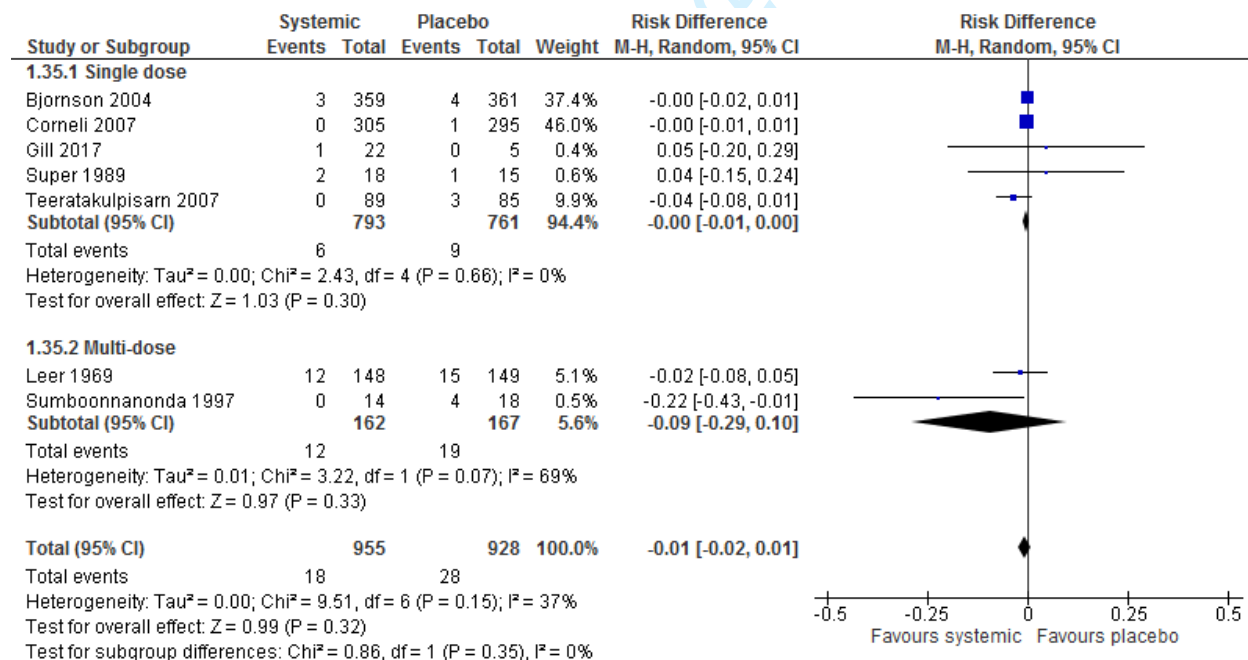

Lung/trachea (by dose) – Peto

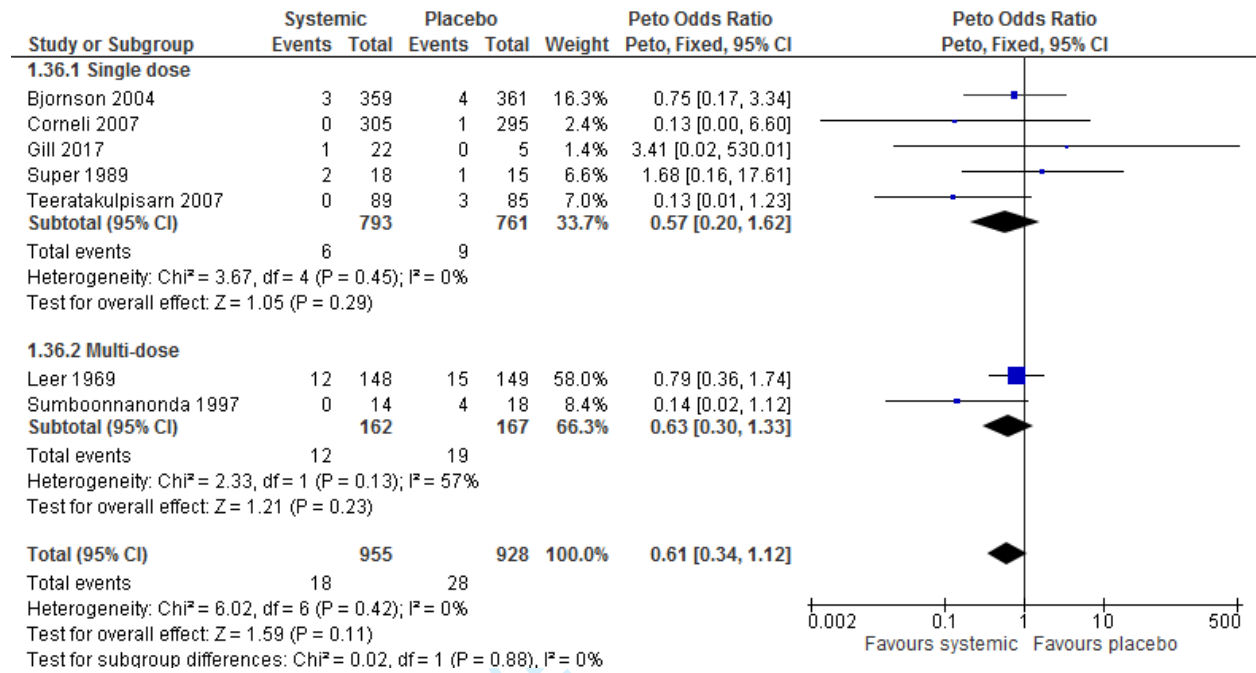

Lung/trachea (by condition)

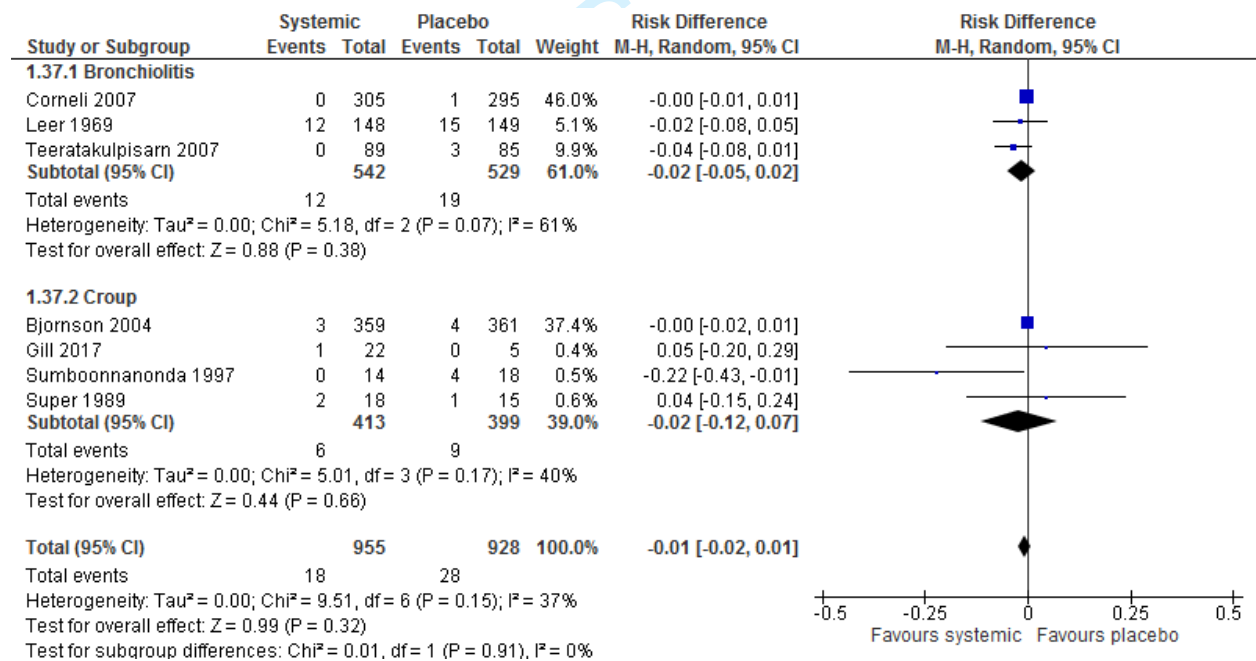

Lung/trachea (by condition) – Peto

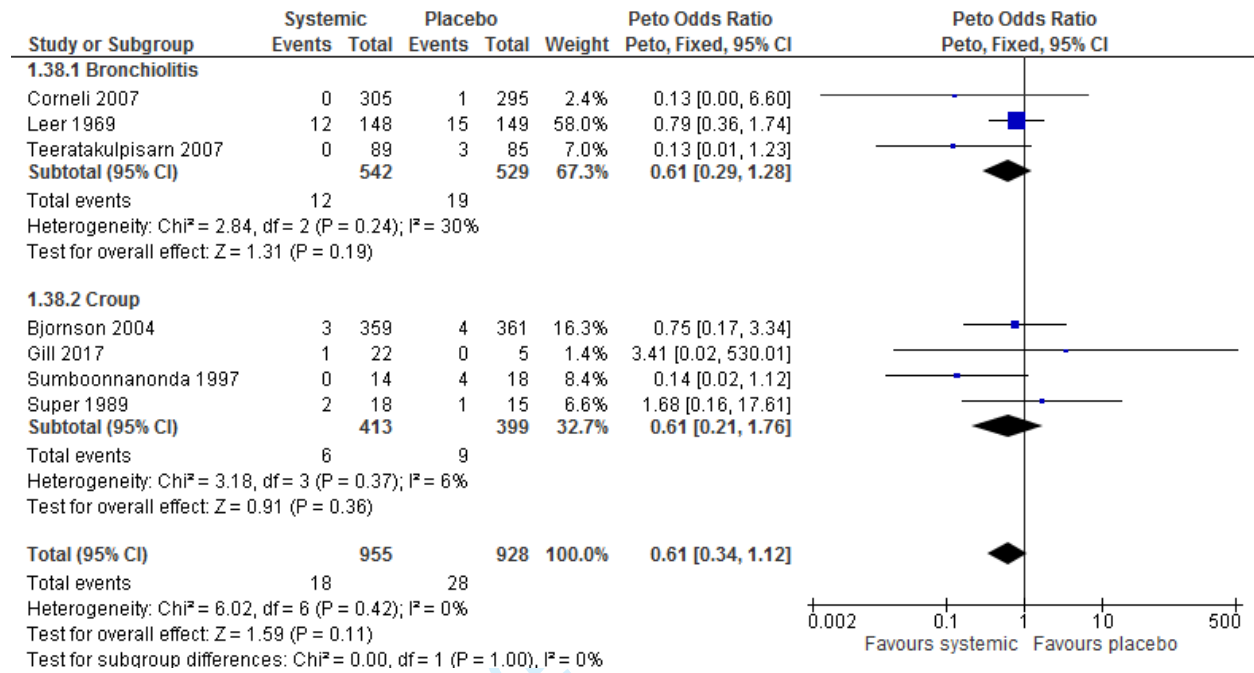

URT

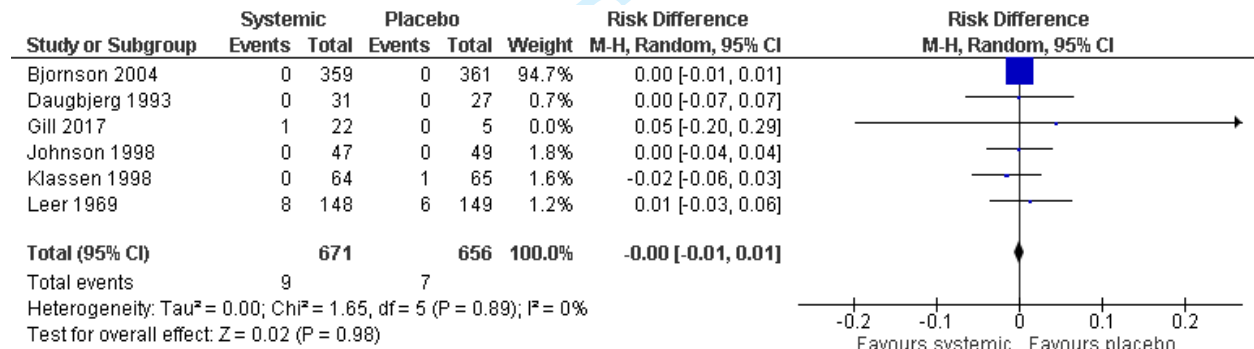

URT – Peto

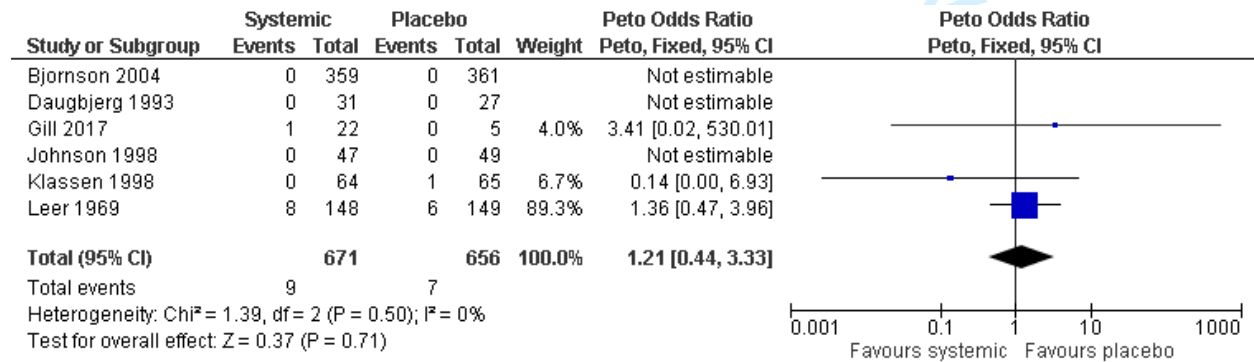

URT (by dose)

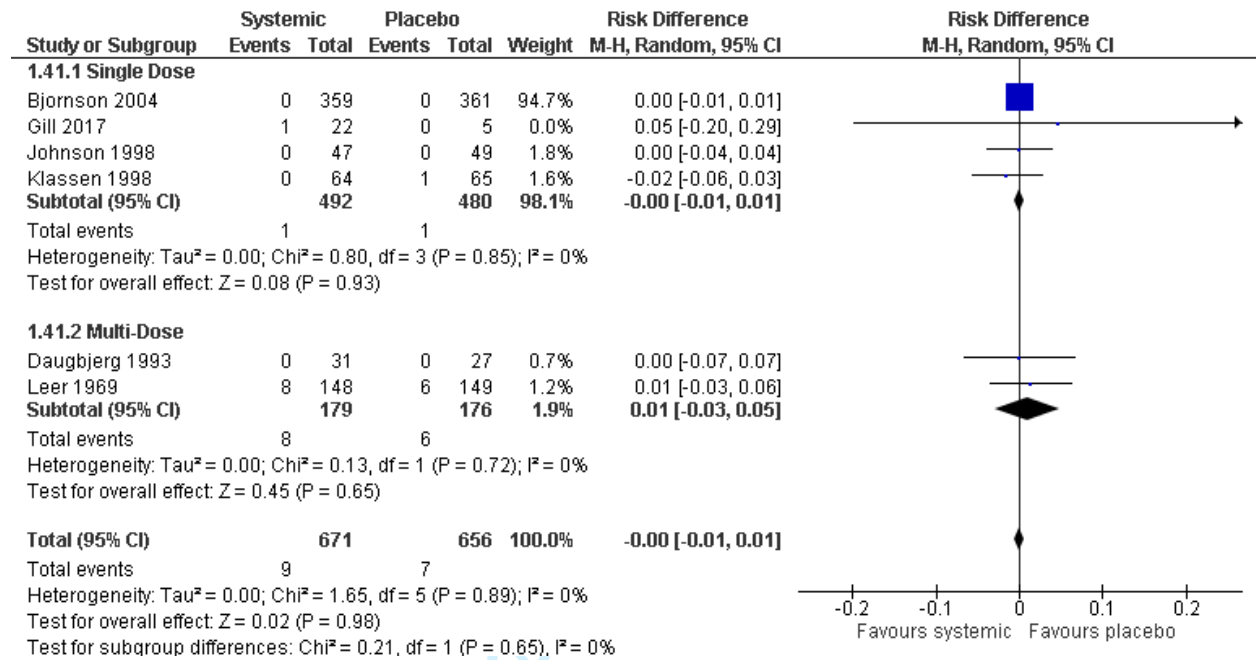

URT (by dose) – Peto

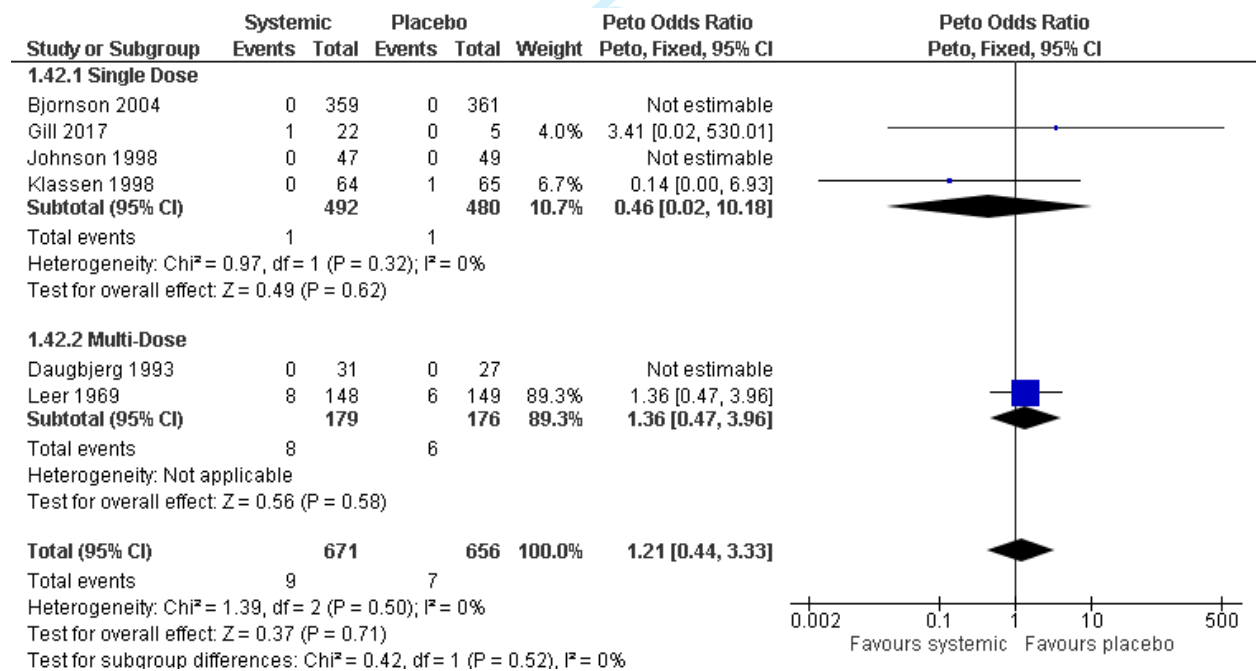

## URT (by condition)

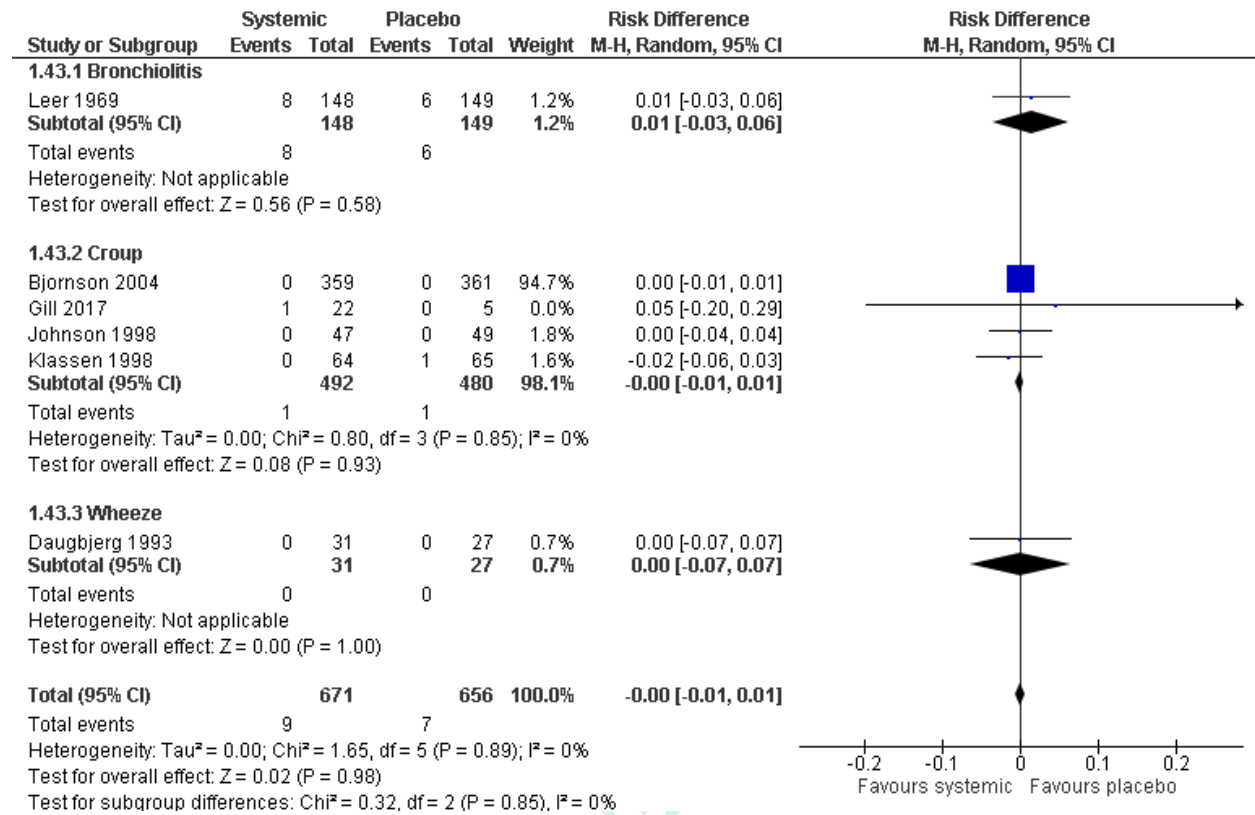

URT (by condition) – Peto

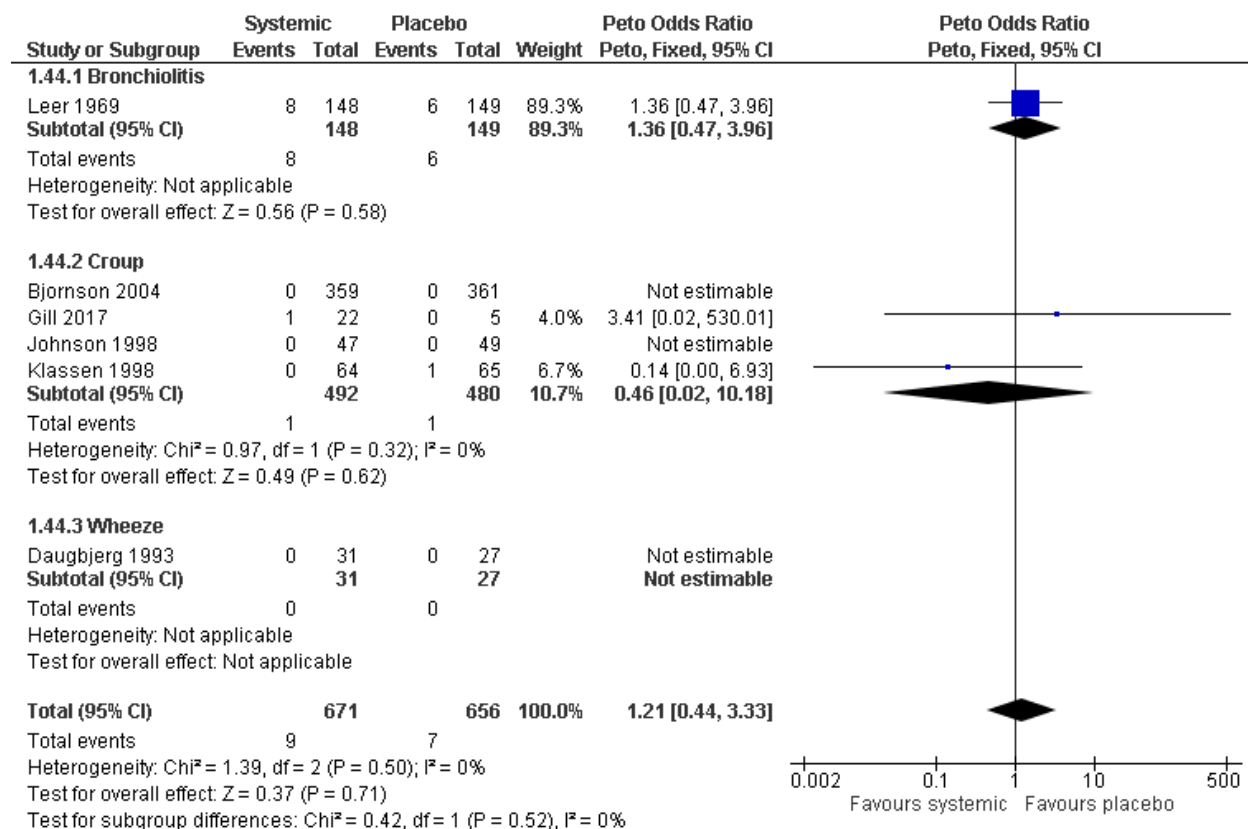

Voice complaints

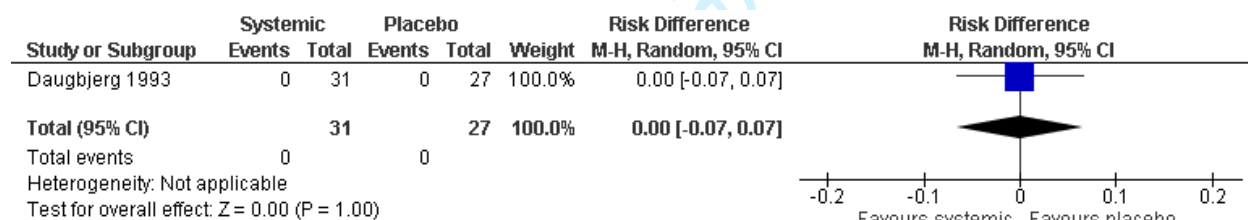

Voice complaints – Peto

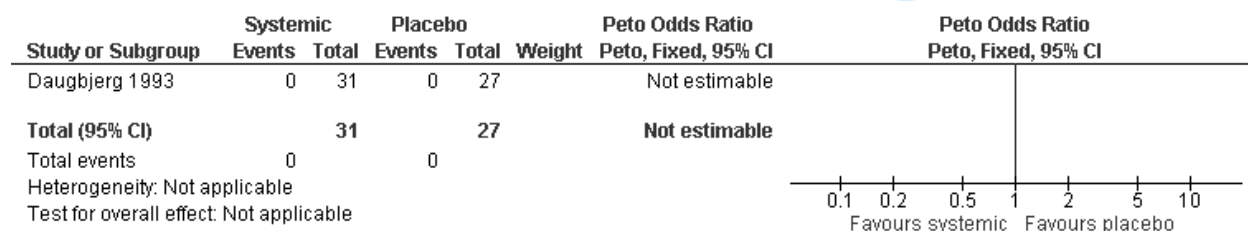

## SYSTEMIC vs. PLACEBO – GI

## GI bleeding

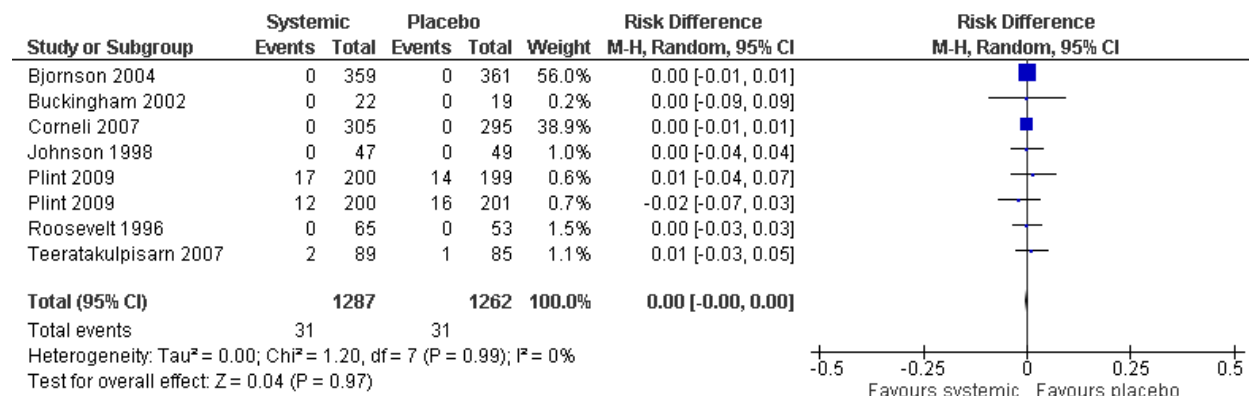

## GI bleeding – Peto

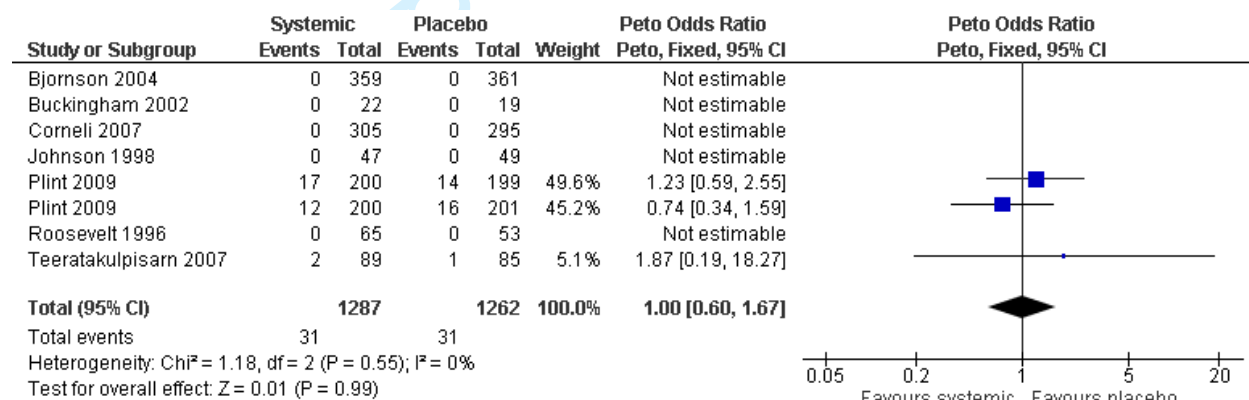



GI bleeding (by dose)

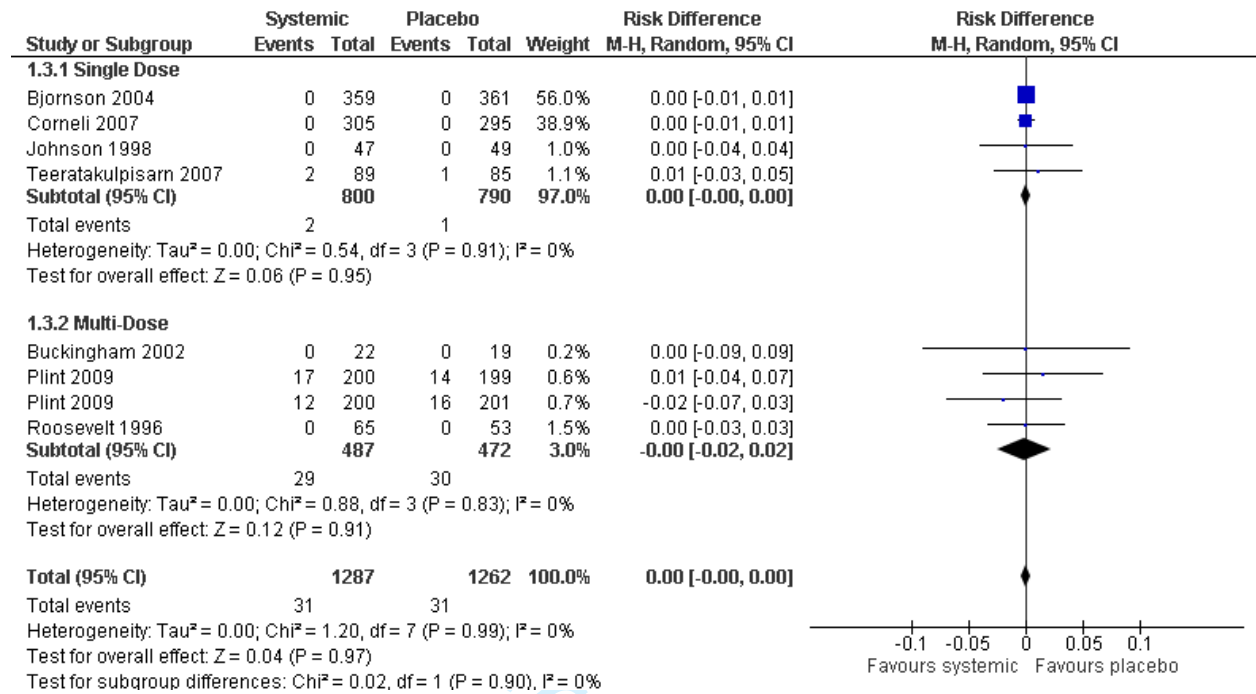

GI bleeding (by dose) – Peto

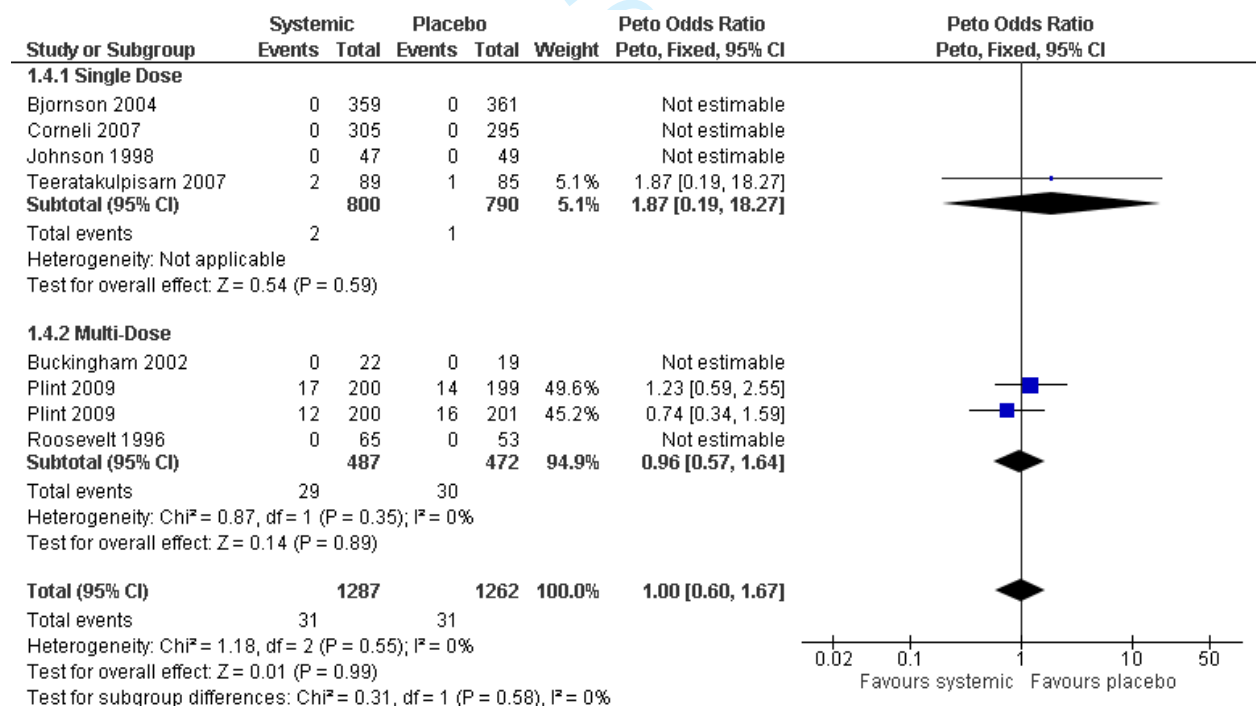

## GI bleeding (by condition)

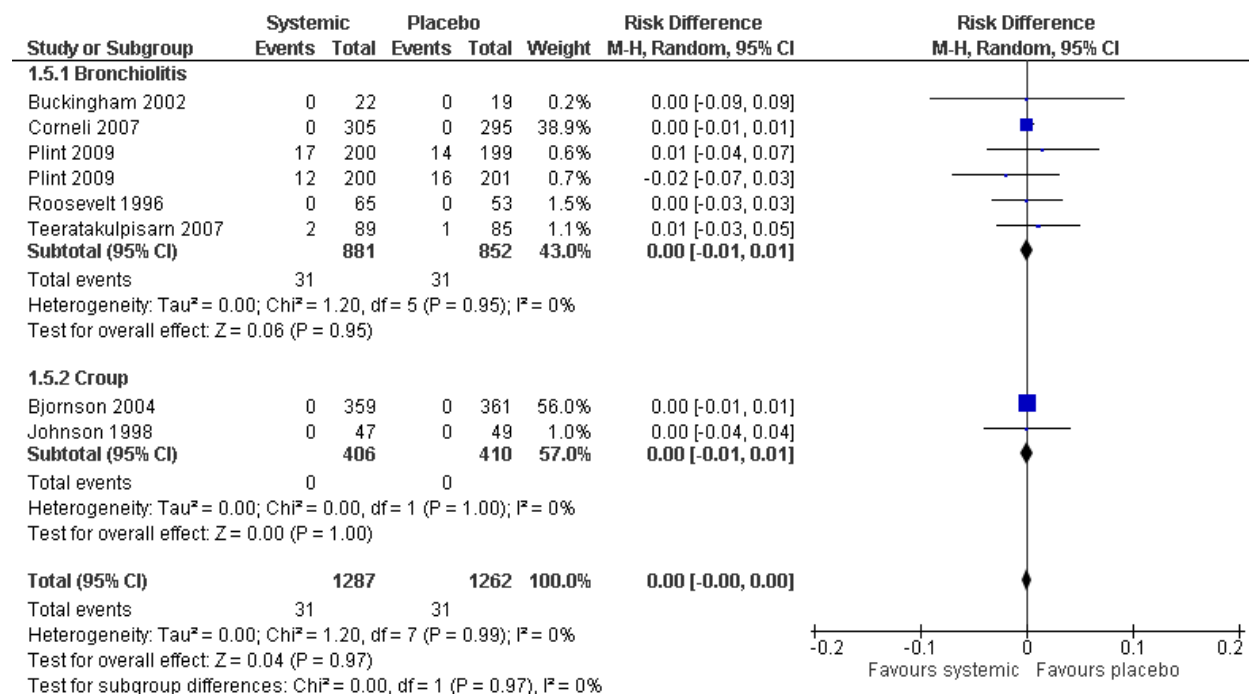

## GI bleeding (by condition) - Peto

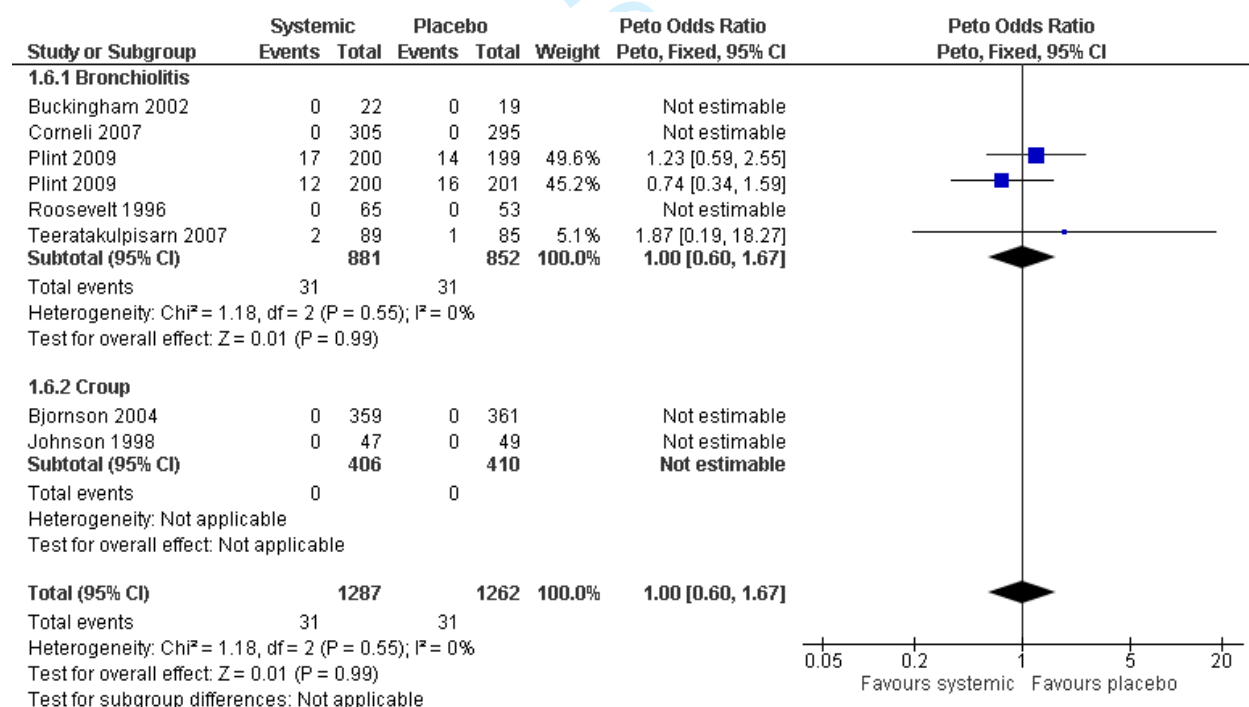

Vomiting

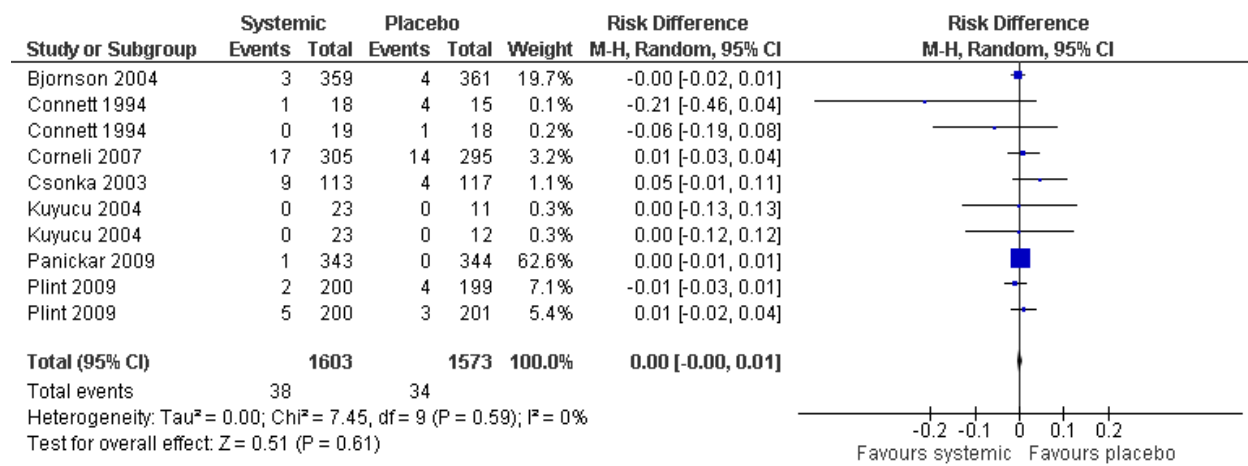

Vomiting – Peto

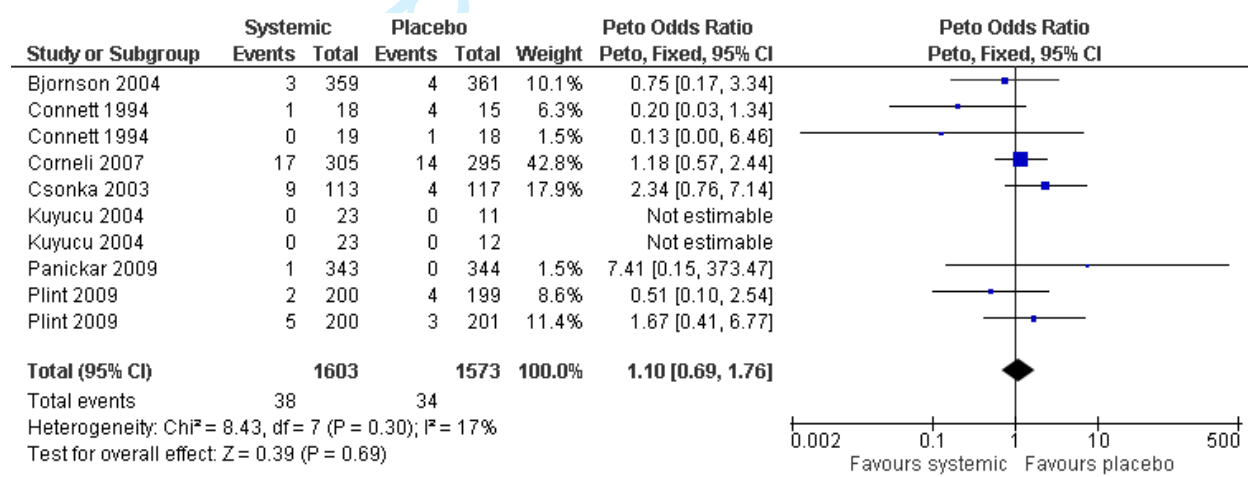

## Vomiting (by dose)

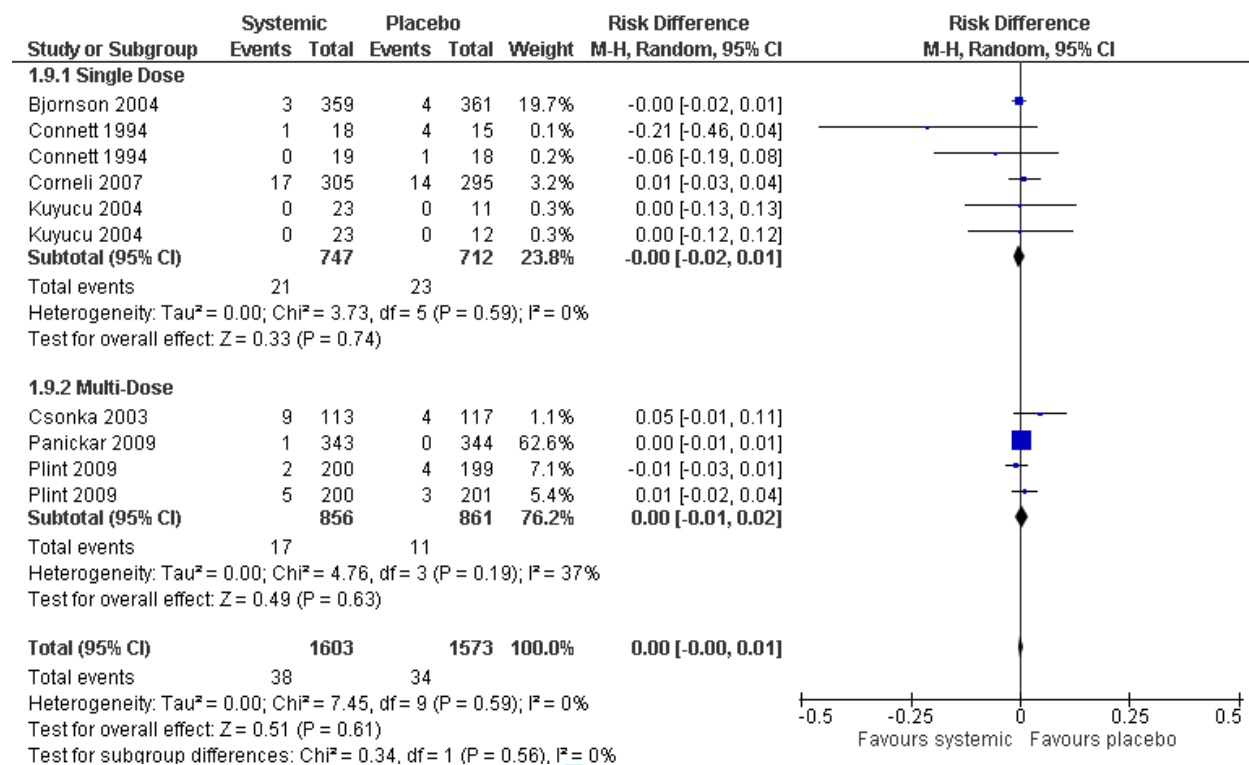

## Vomiting (by dose) – Peto

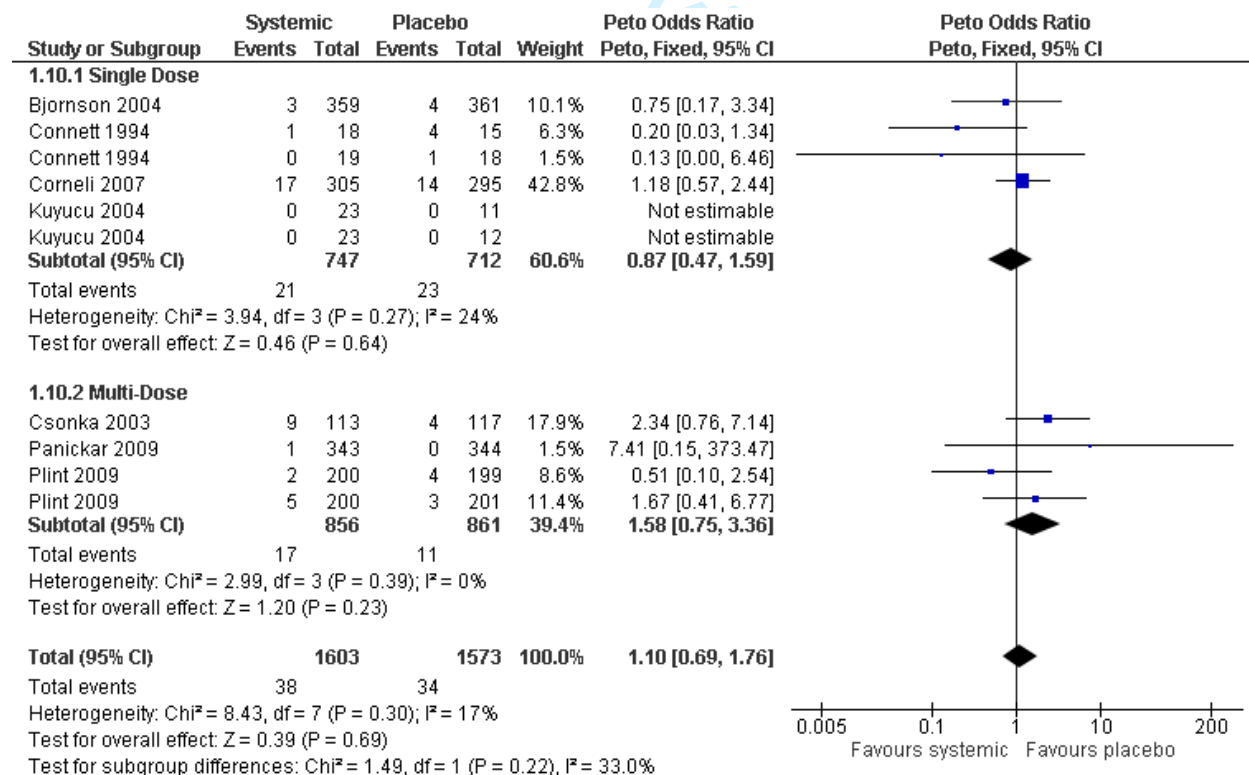

Vomiting (by condition)

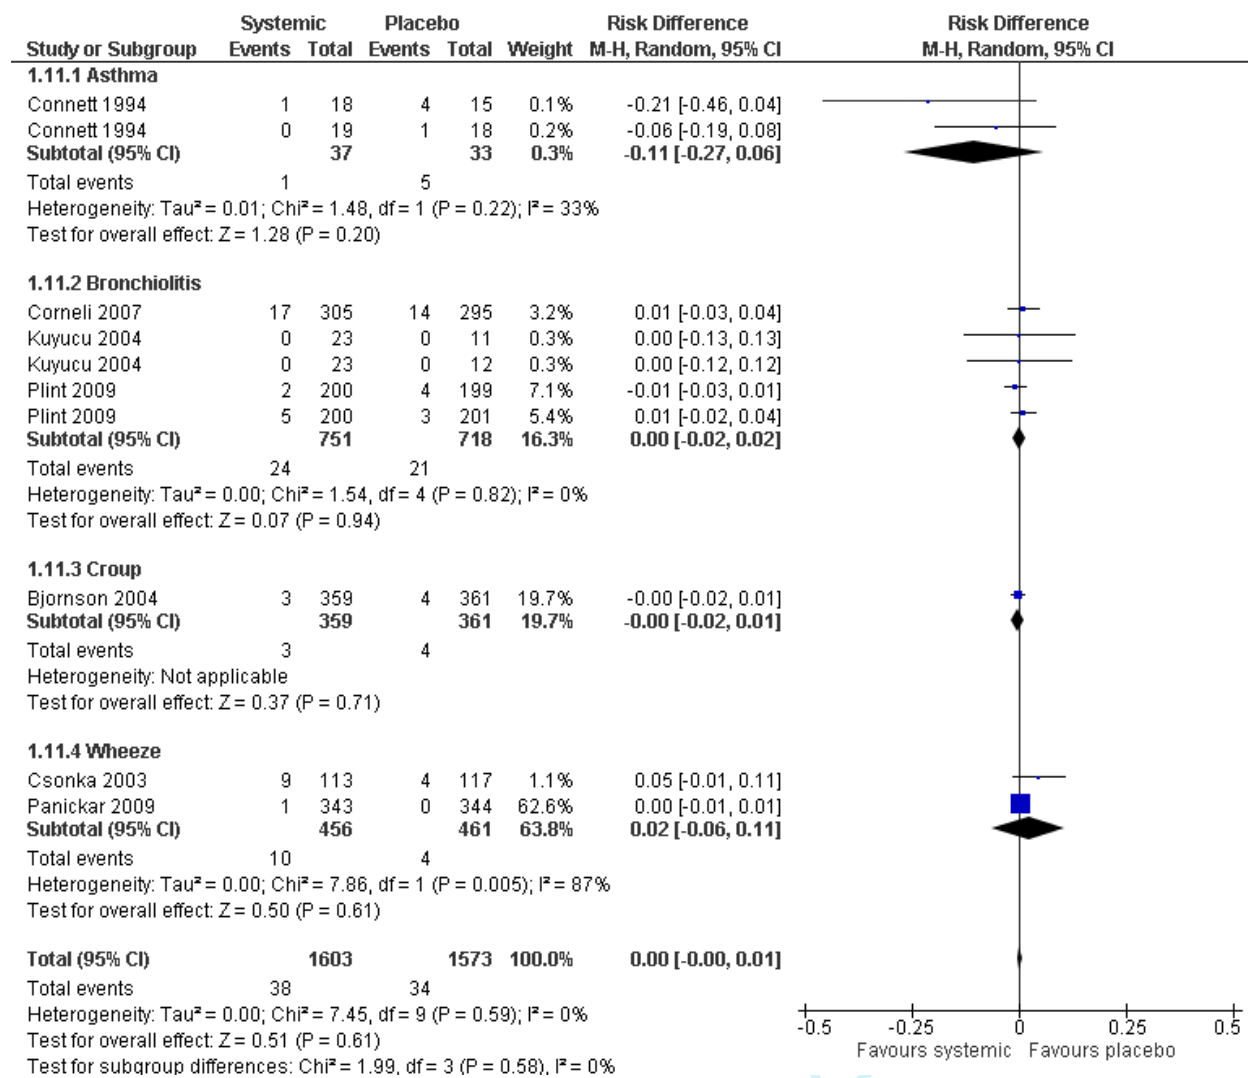

only

Vomiting (by condition) – Peto

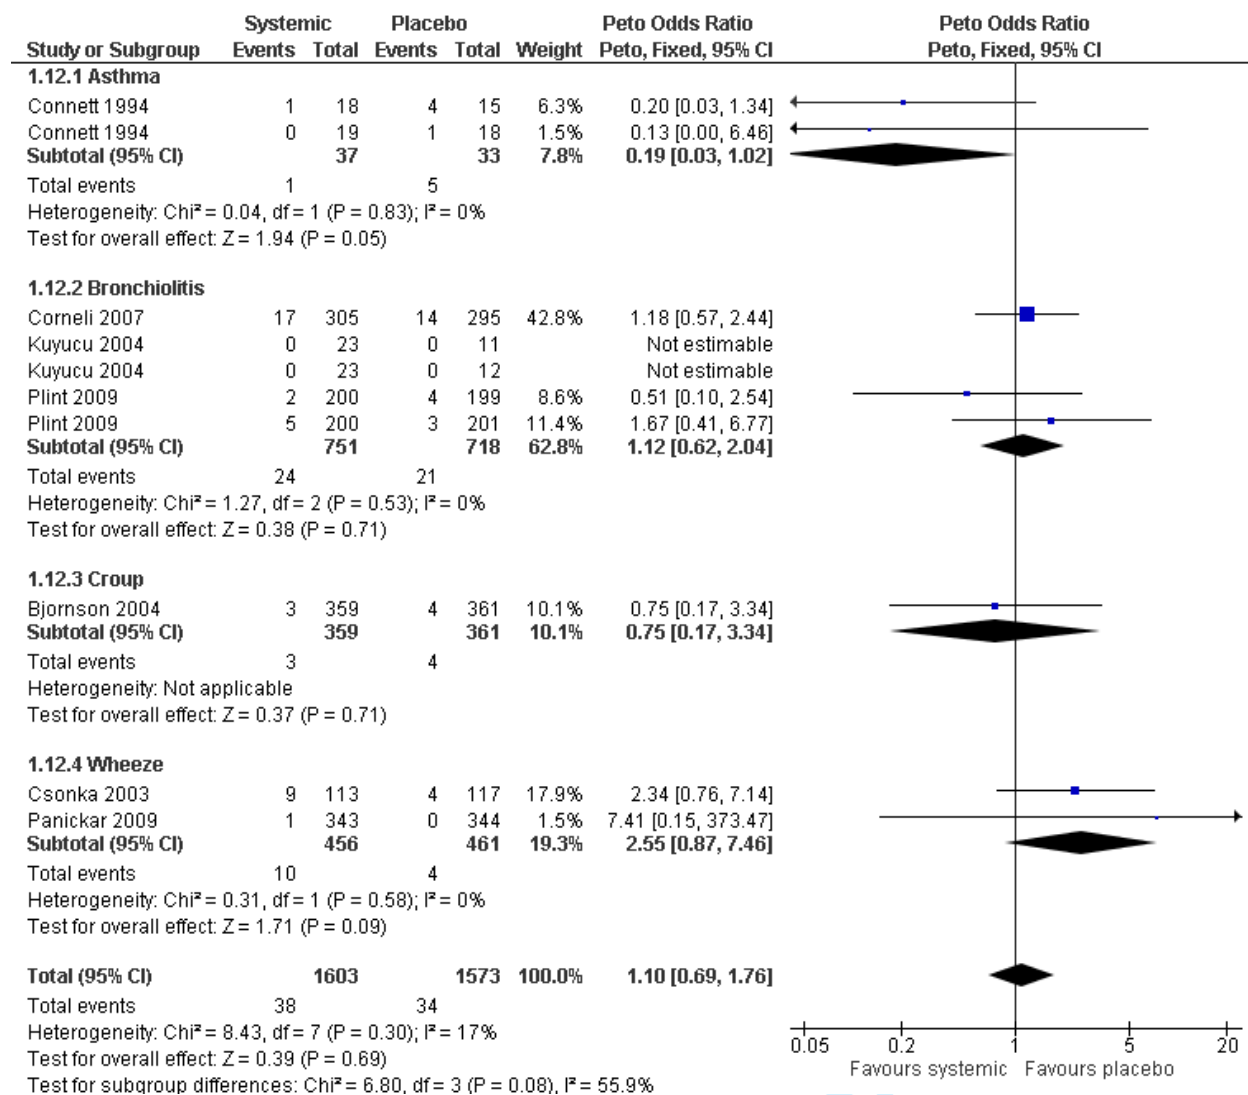

Abdominal pain

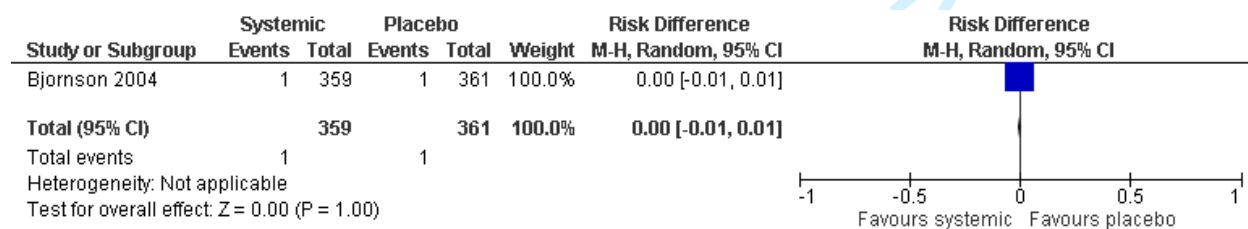

Abdominal pain – Peto

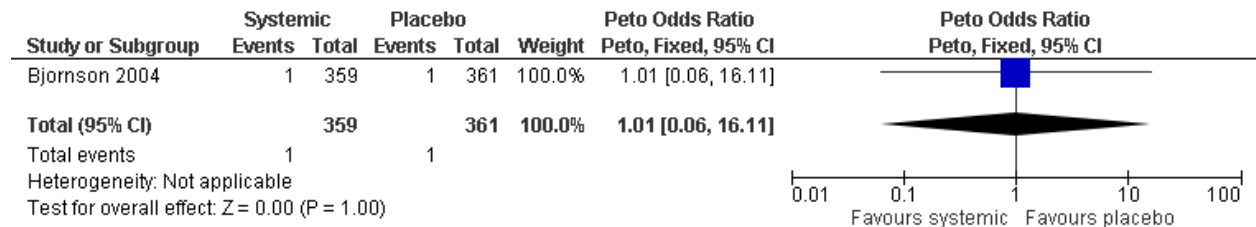

Diarrhea

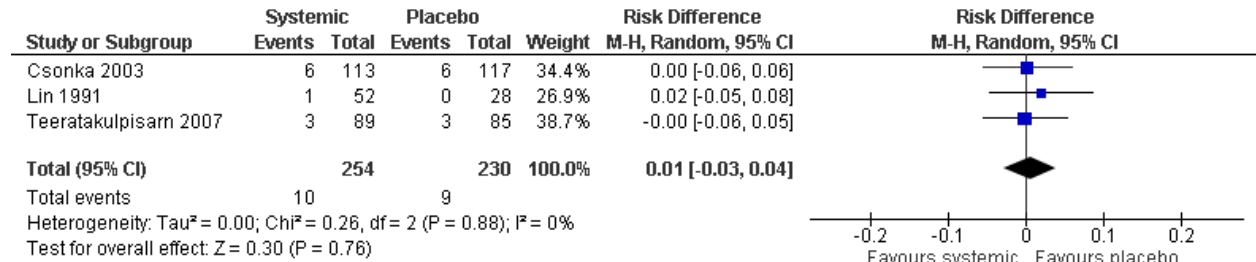

Diarrhea – Peto

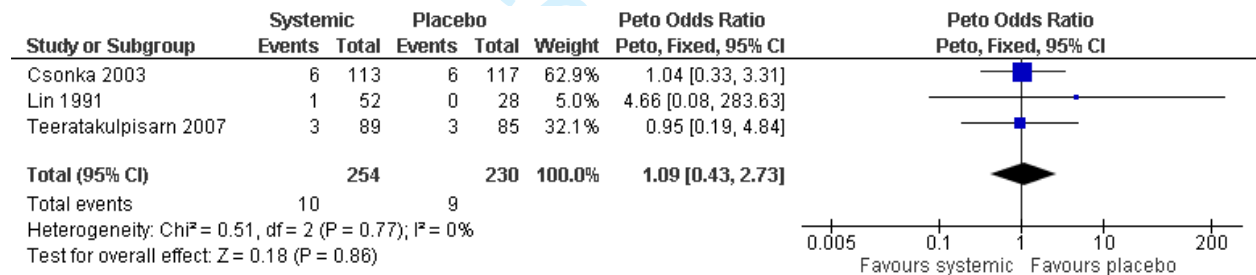

Diarrhea (by dose)

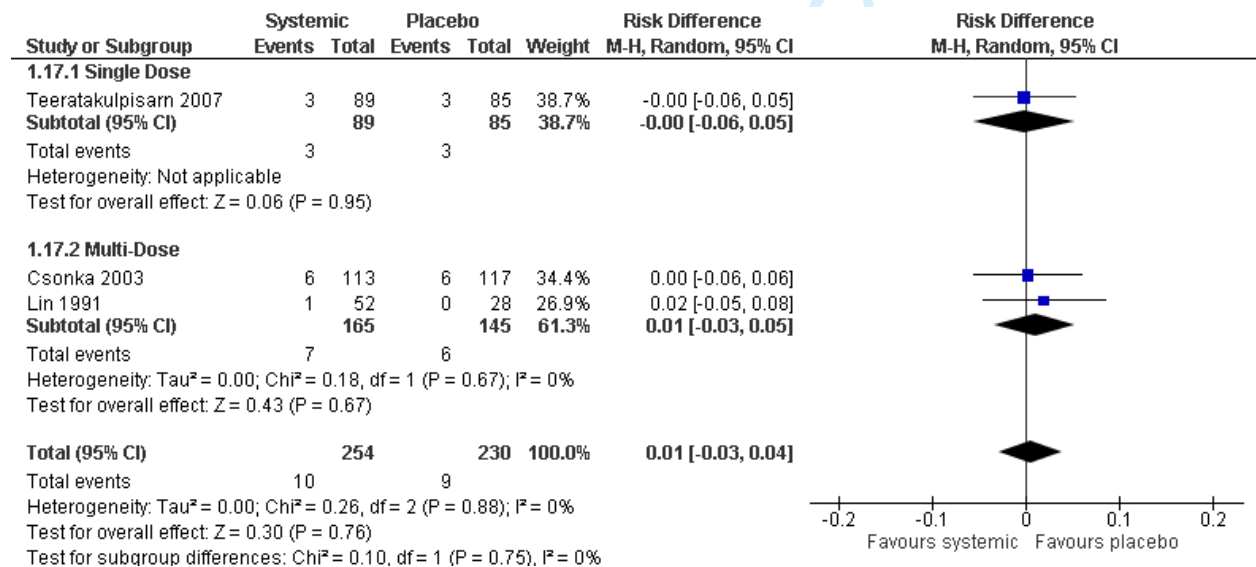

## Diarrhea (by dose) – Peto

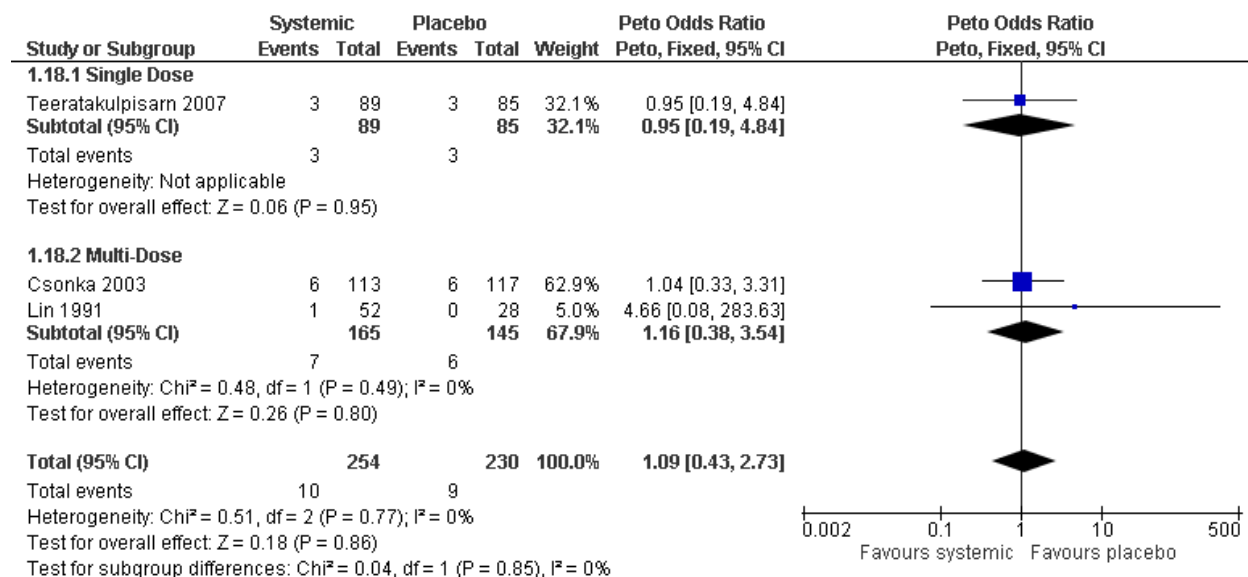

## Diarrhea (by condition)

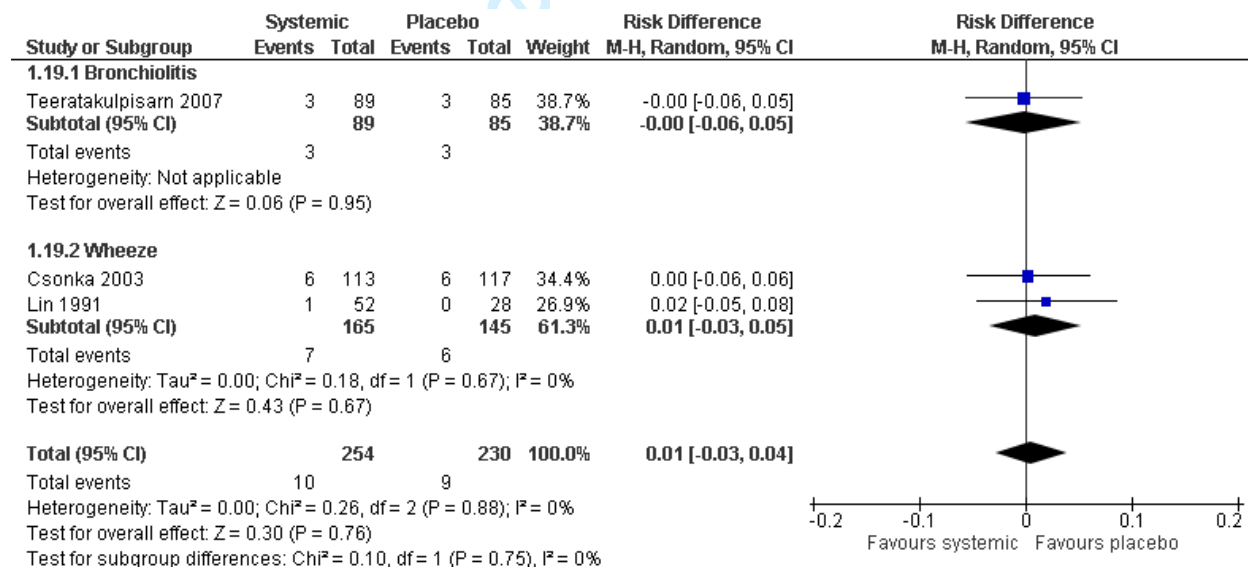



Diarrhea (by condition) – Peto

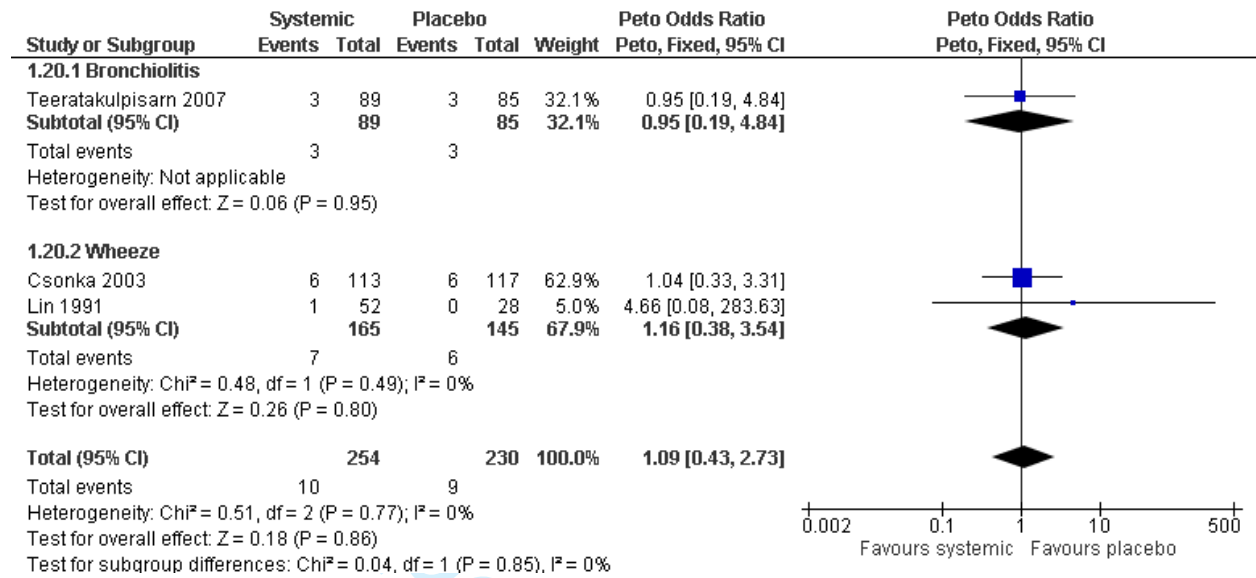

## SYSTEMIC vs. PLACEBO – CNS &amp; Behaviour

## Tremor/jitteriness

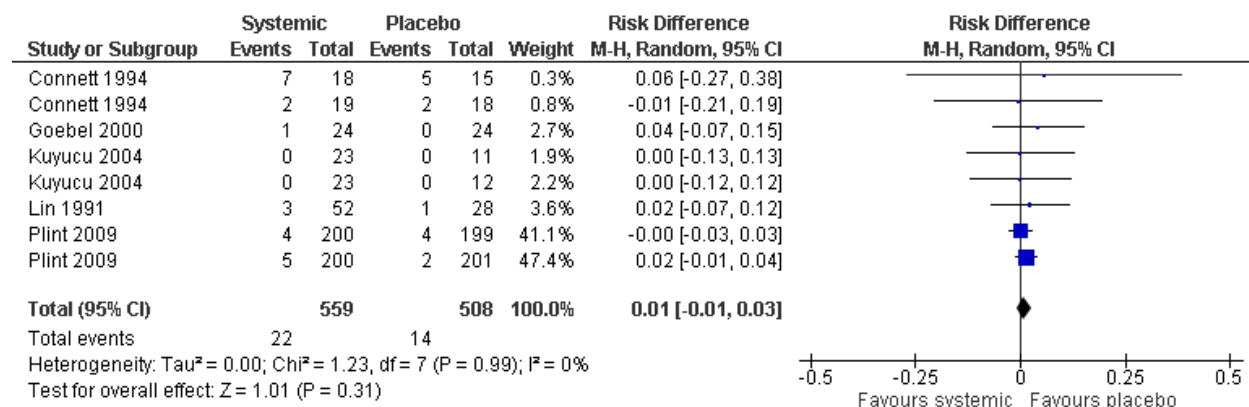

## Tremor/jitteriness – Peto

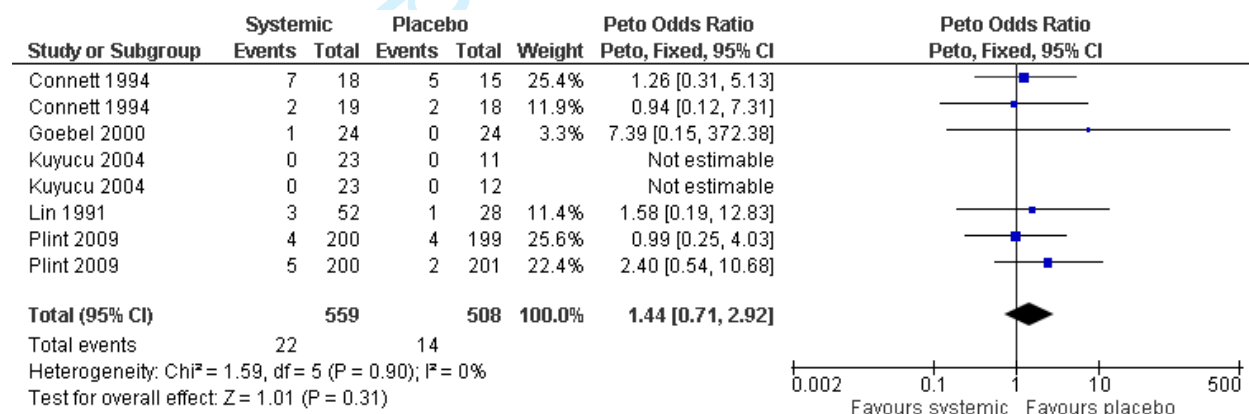

Tremor/jitteriness (by dose)

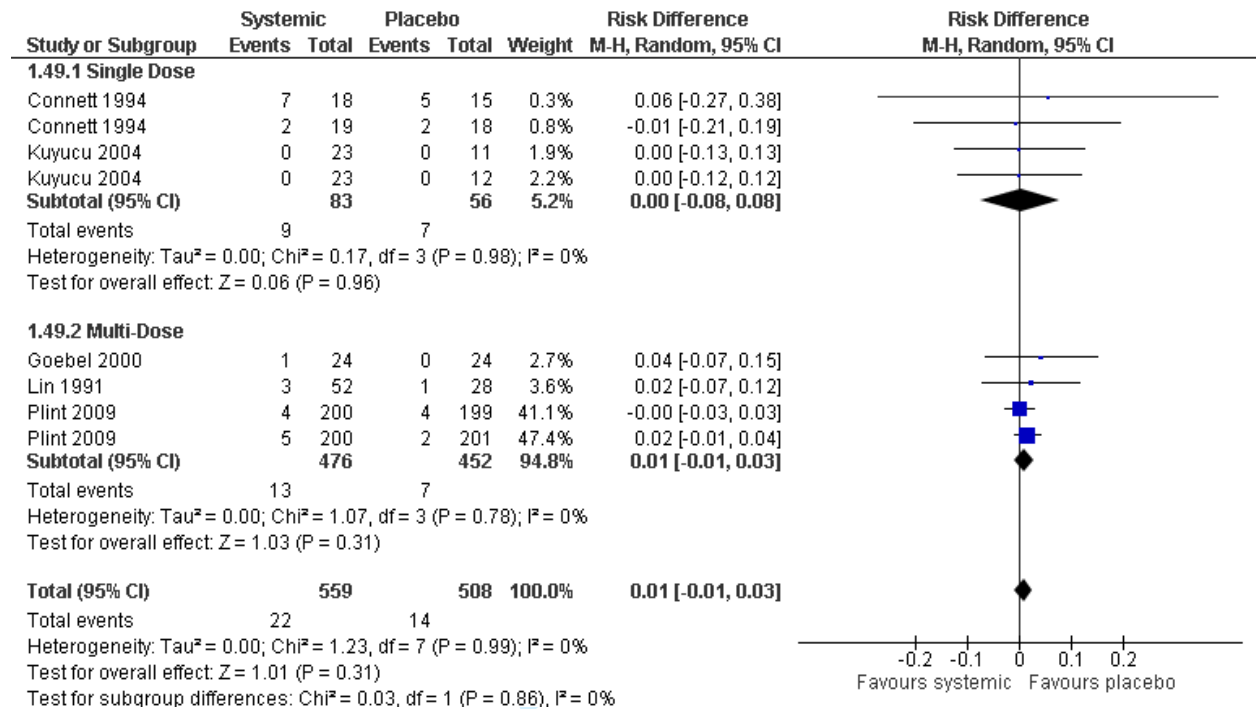

Tremor/jitteriness (by dose) – Peto

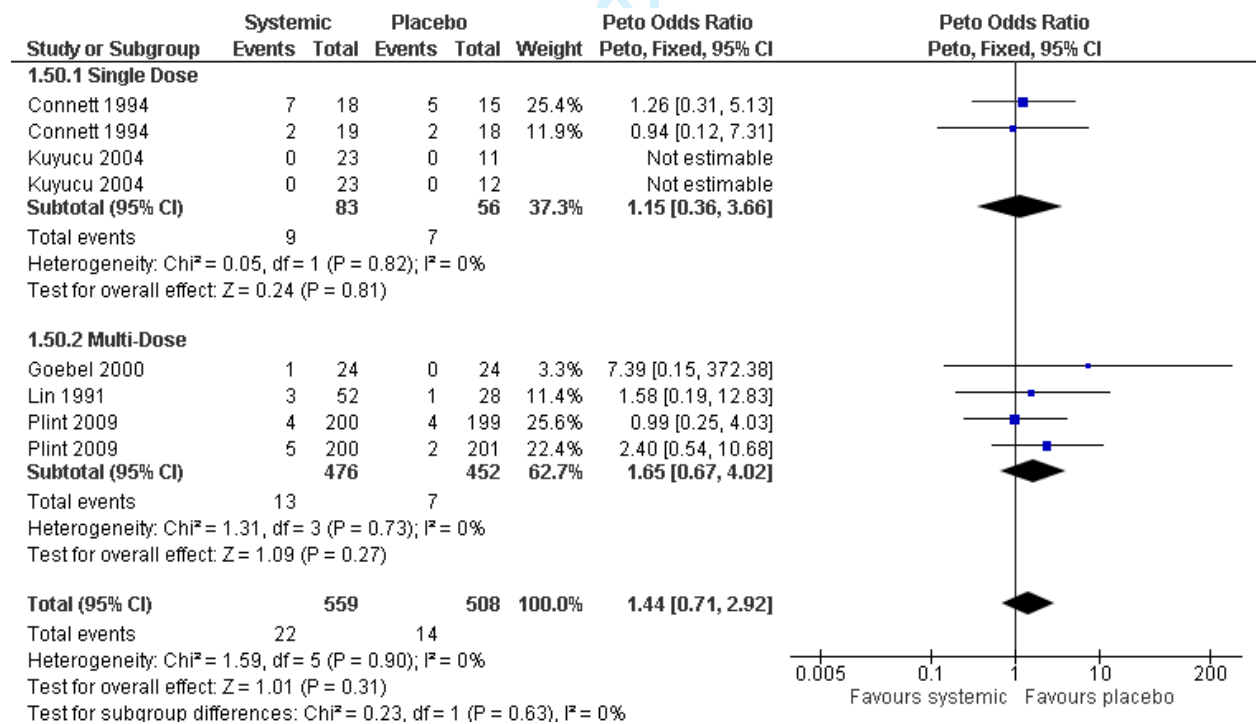

## Tremor/jitteriness (by condition)

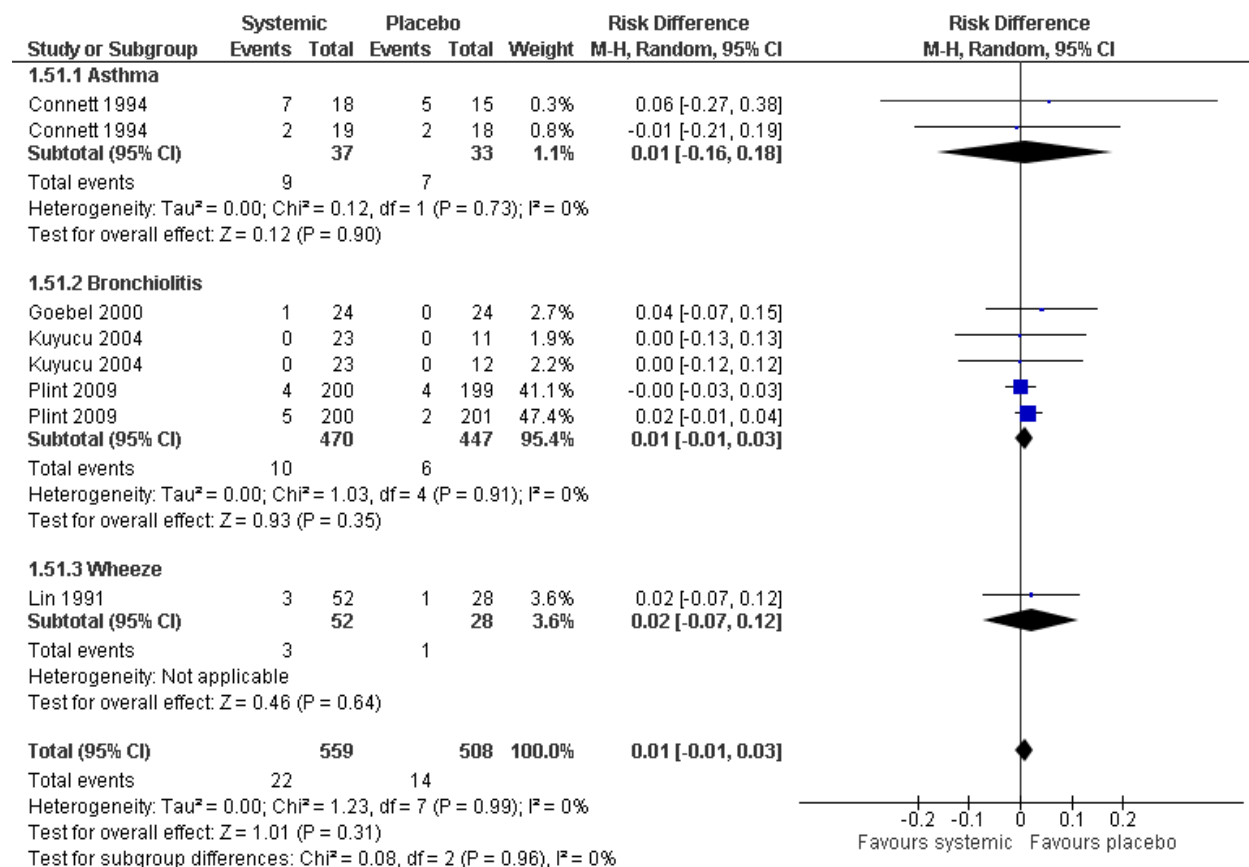

Tremor/jitteriness (by condition) – Peto

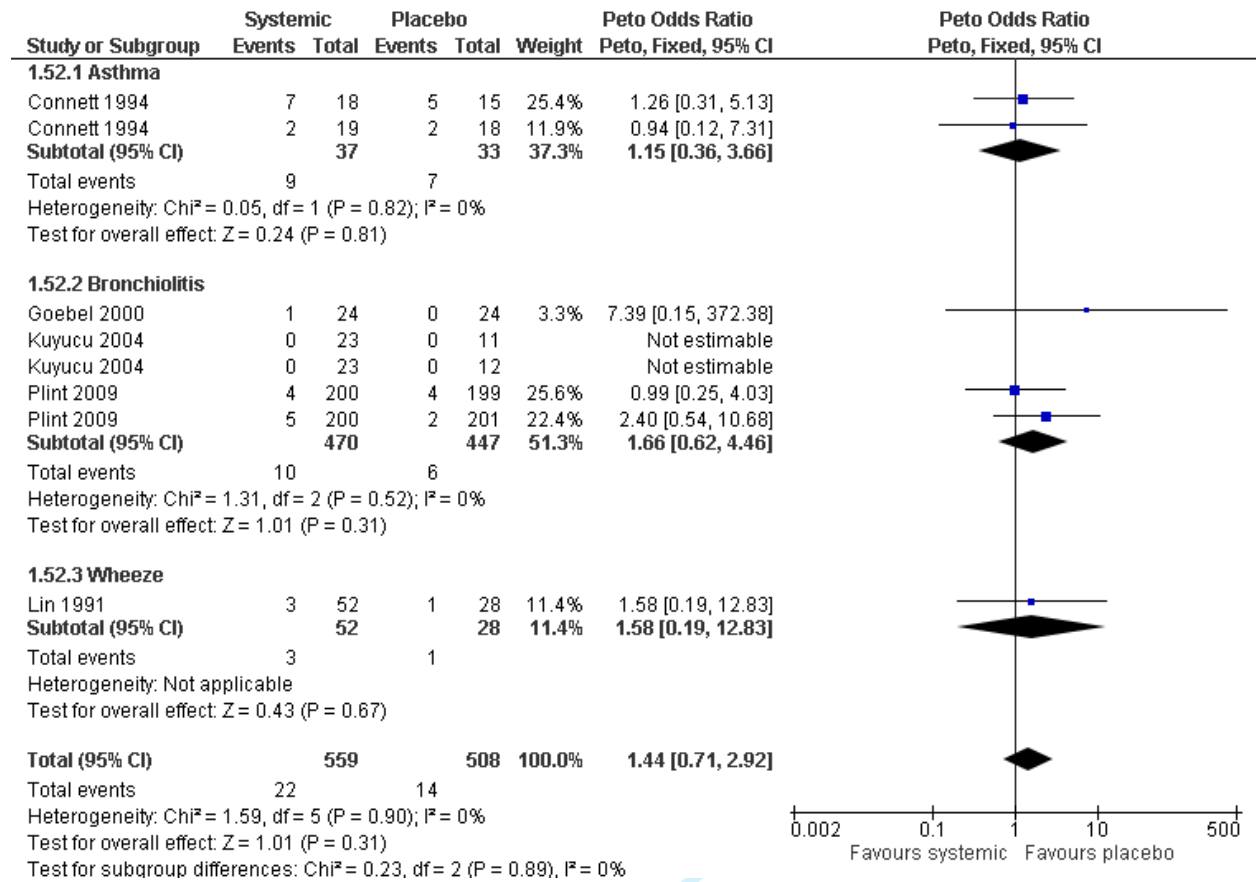

Behaviour change

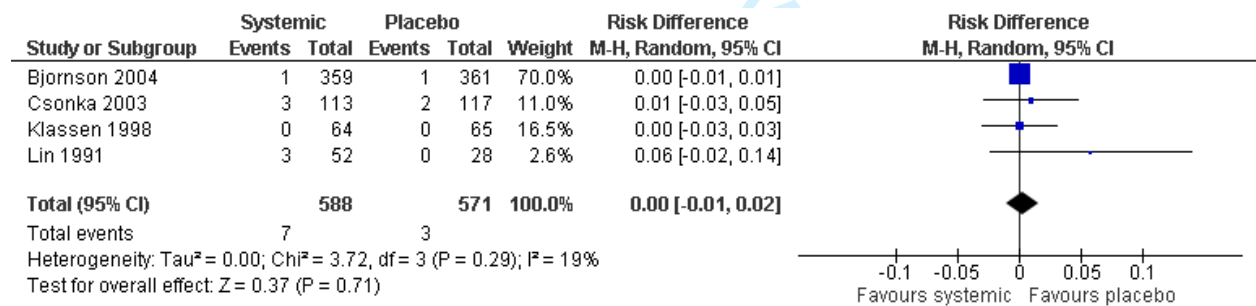

Behaviour change – Peto

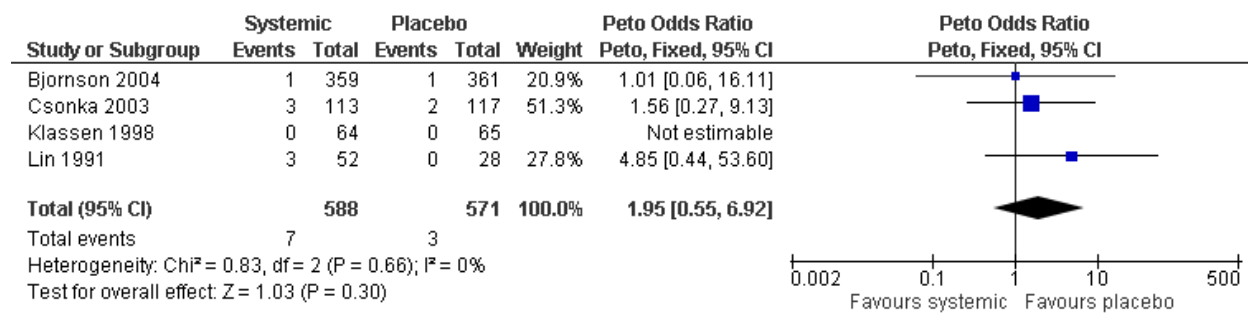

Behaviour change (by dose)

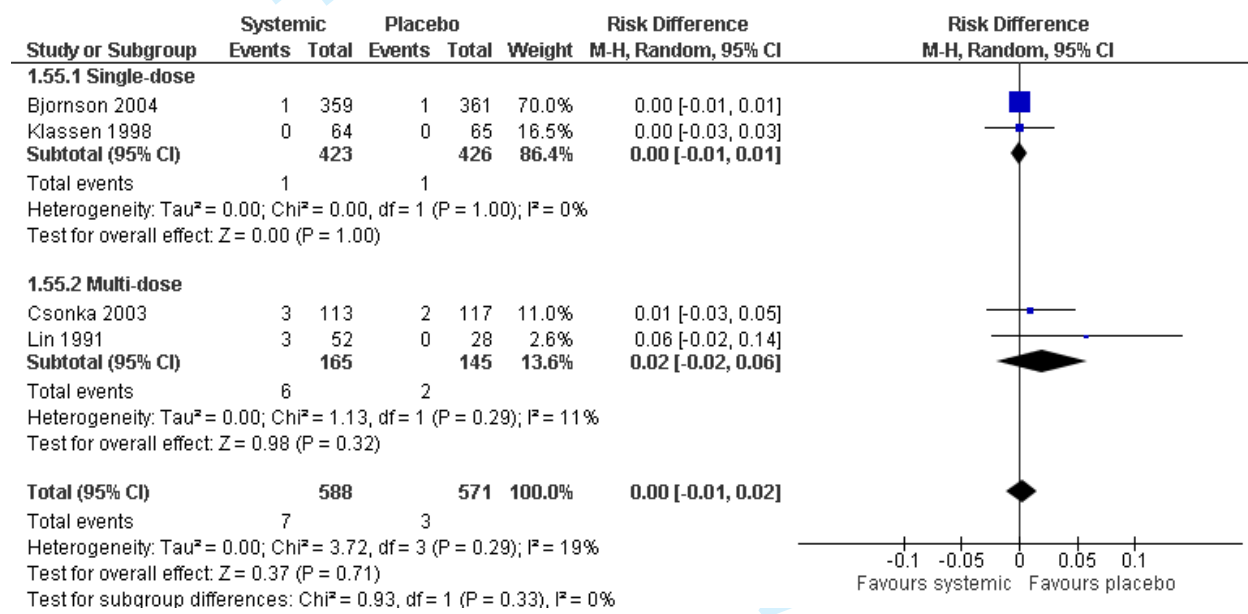

Behaviour change (by dose) – Peto

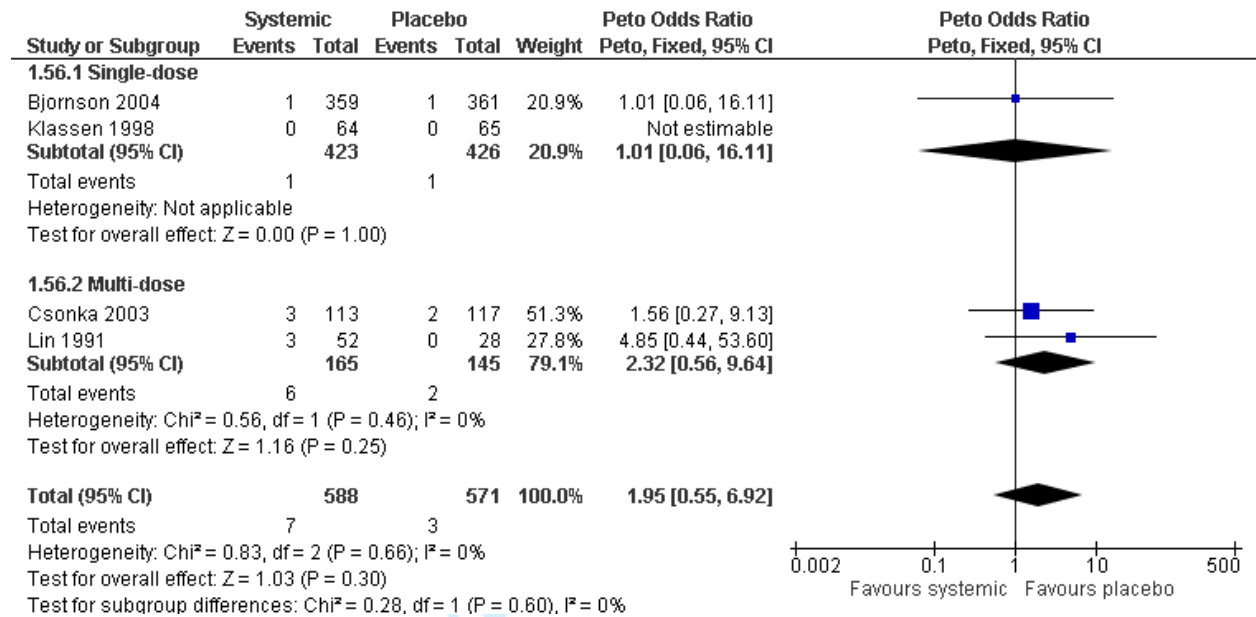

Behaviour change (by condition)

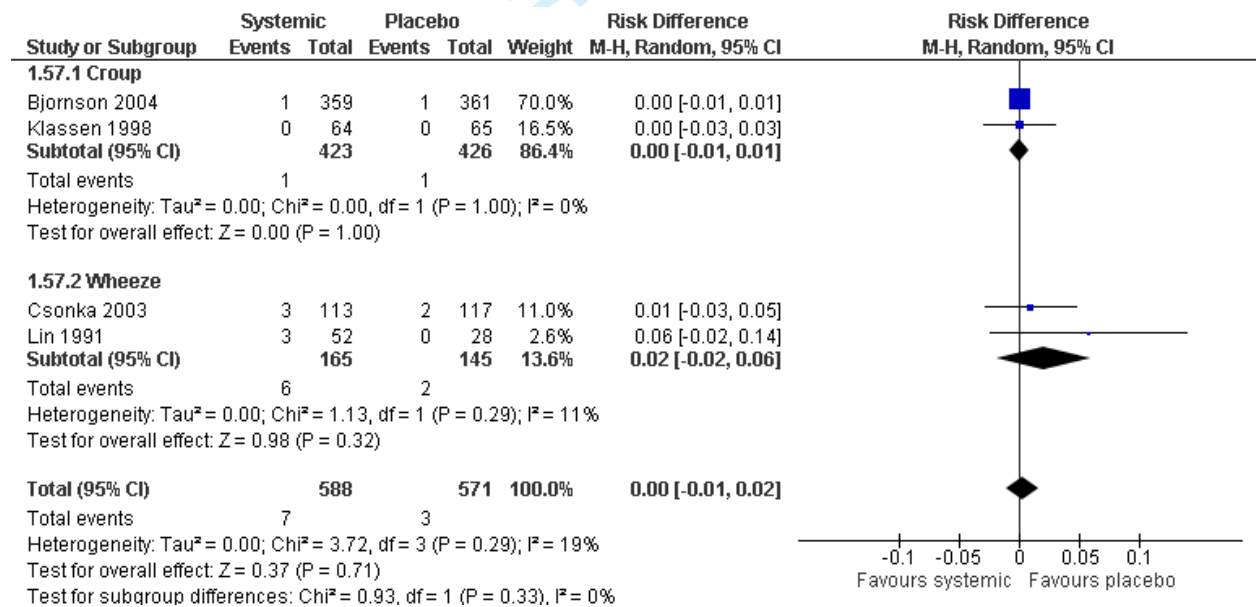

## Behaviour change (by condition) – Peto

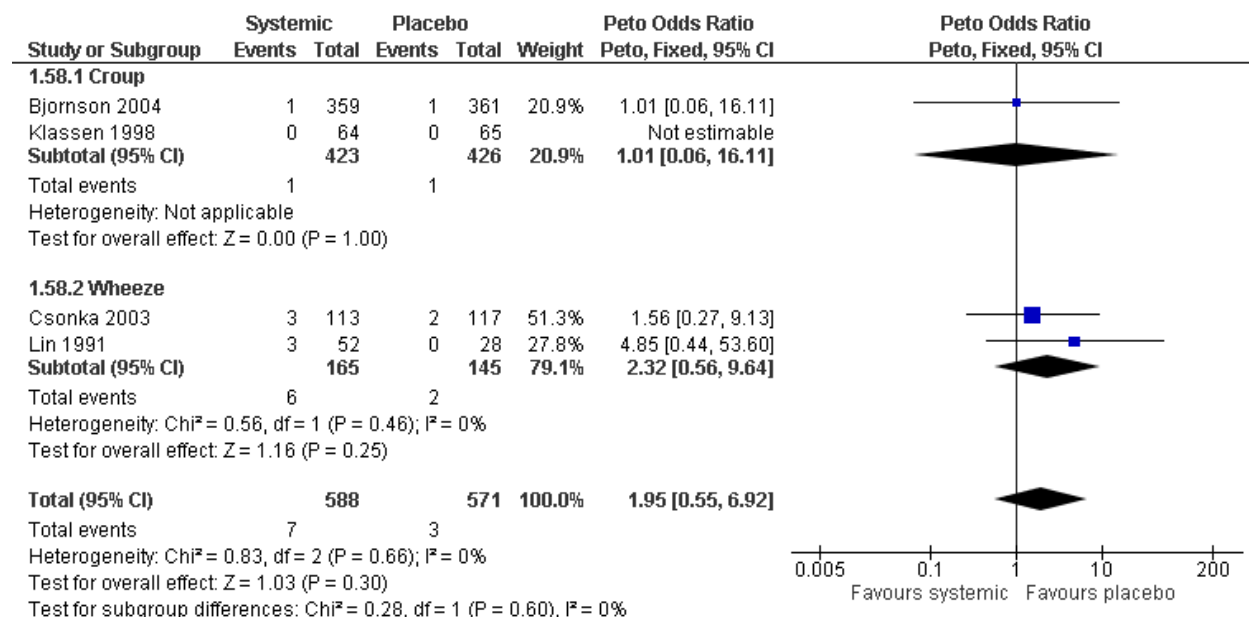

## Headache

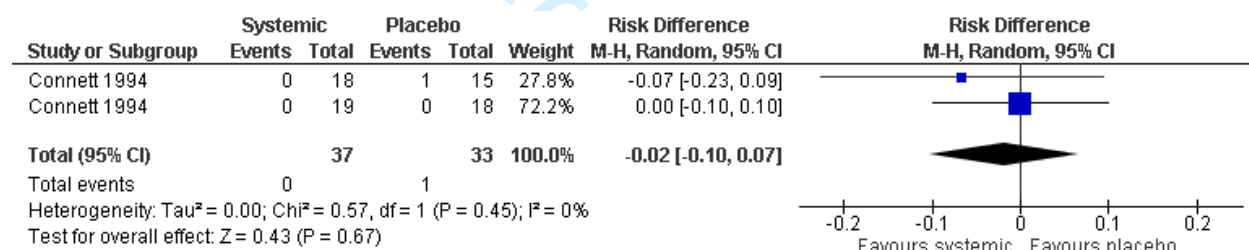

## Headache – Peto

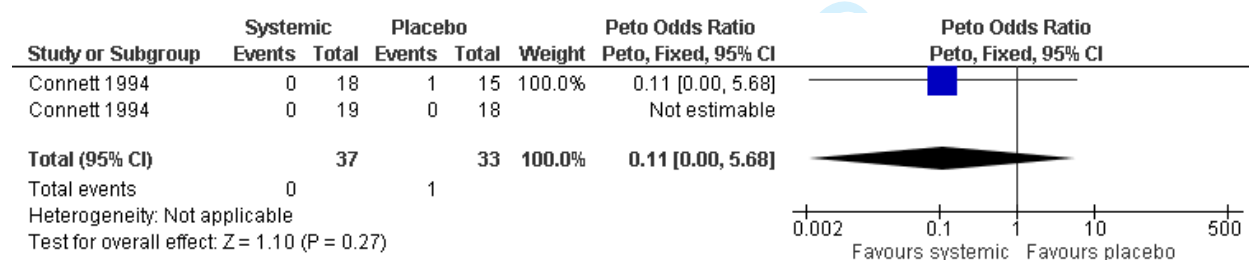



**SYSTEMIC vs. PLACEBO – Dermatologic**

**Integument**

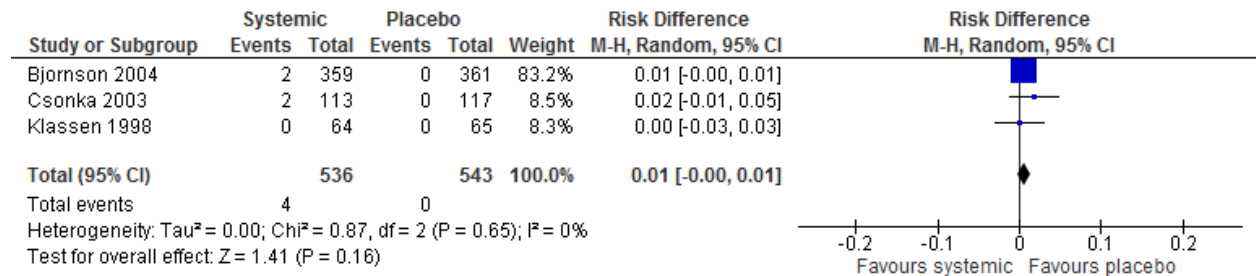

**Integument – Peto**

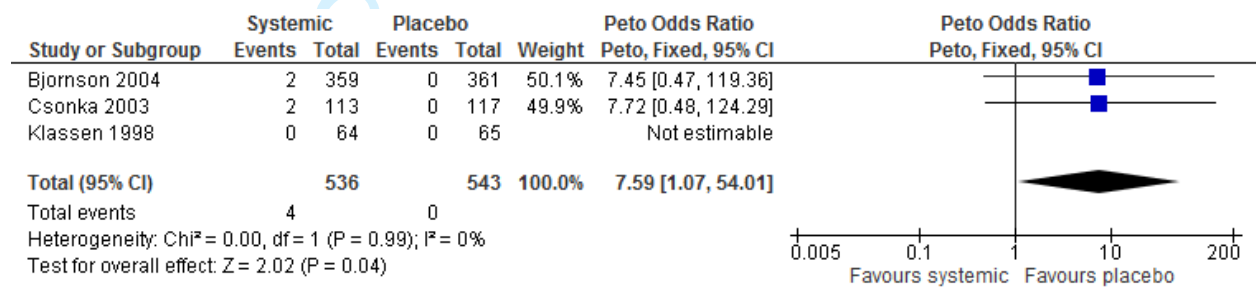

**Integument (by dose)**

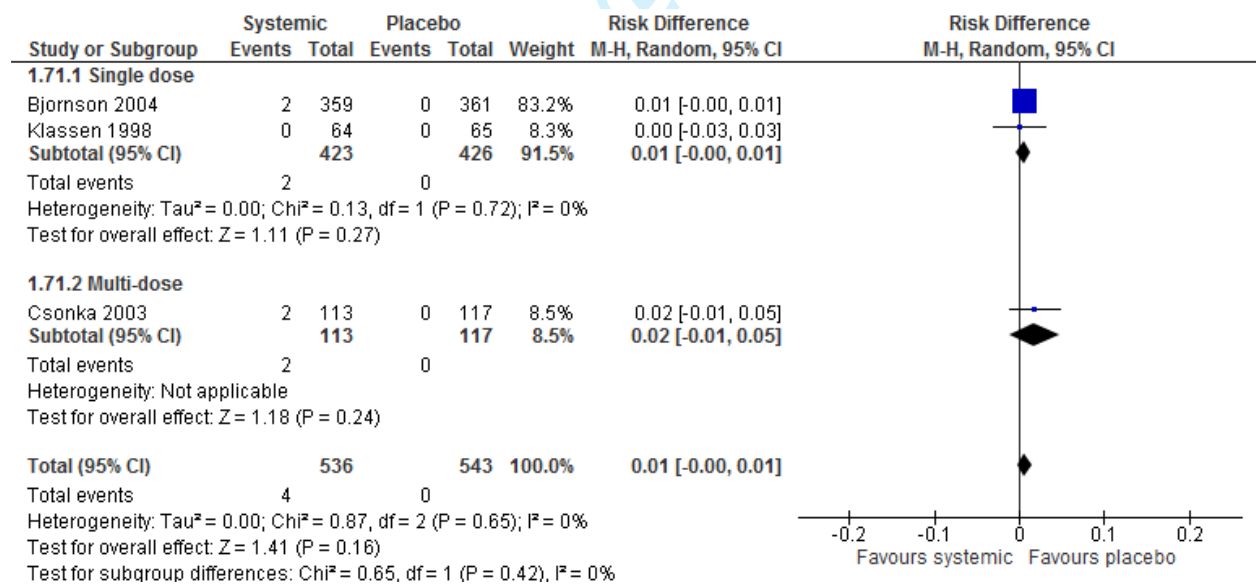

## Integument (by dose) – Peto

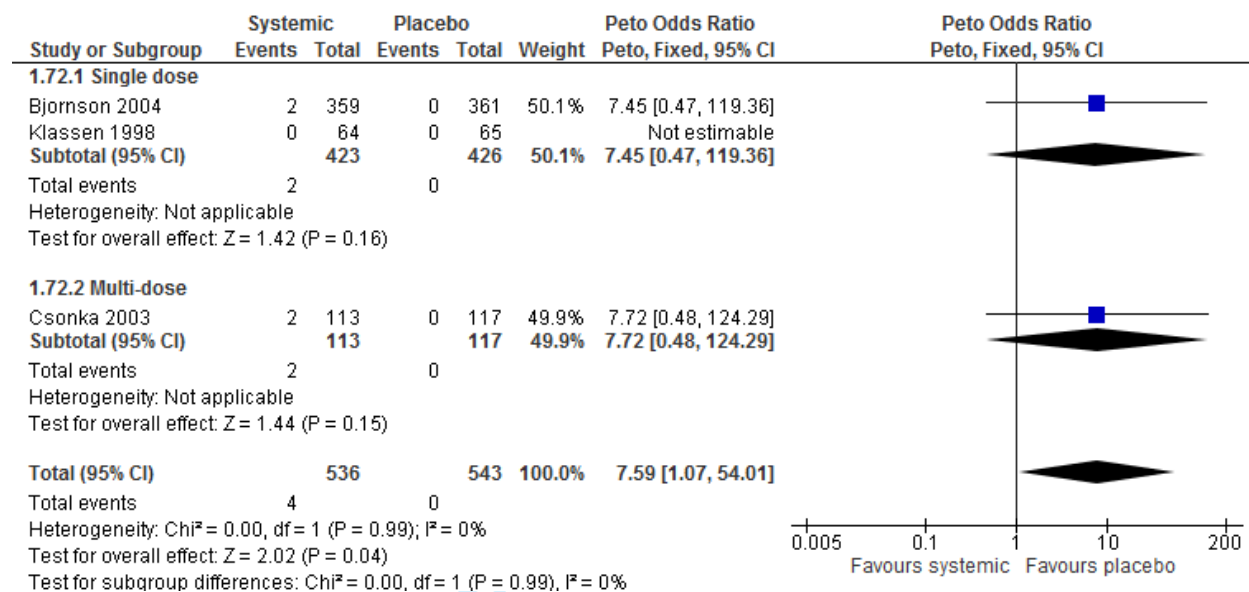

## Integument (by condition)

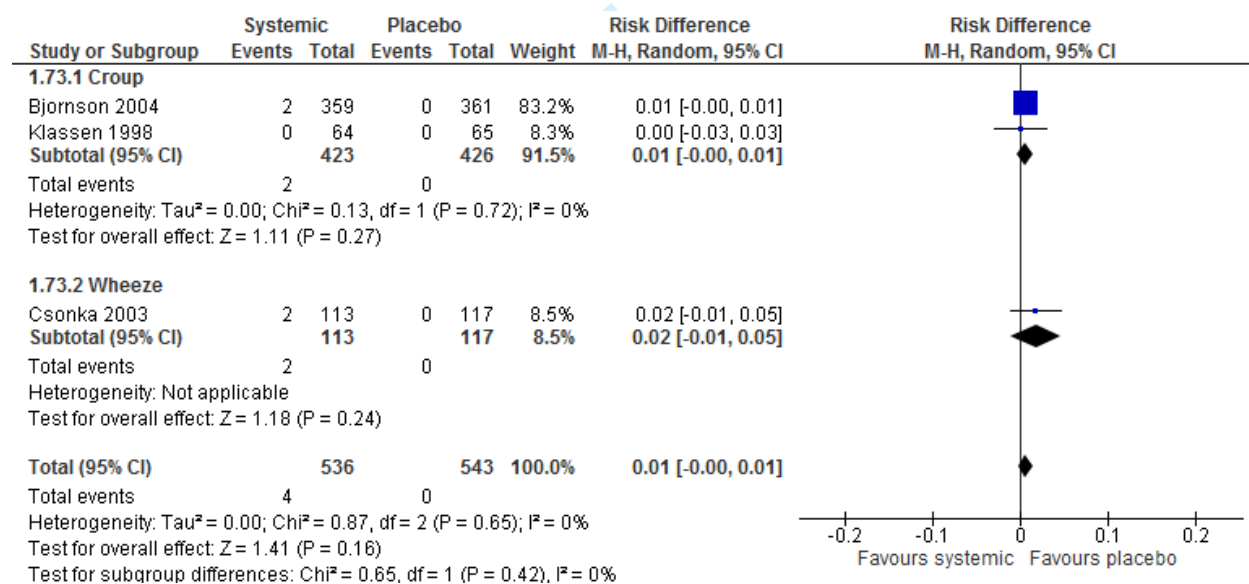

Integument (by condition) – Peto

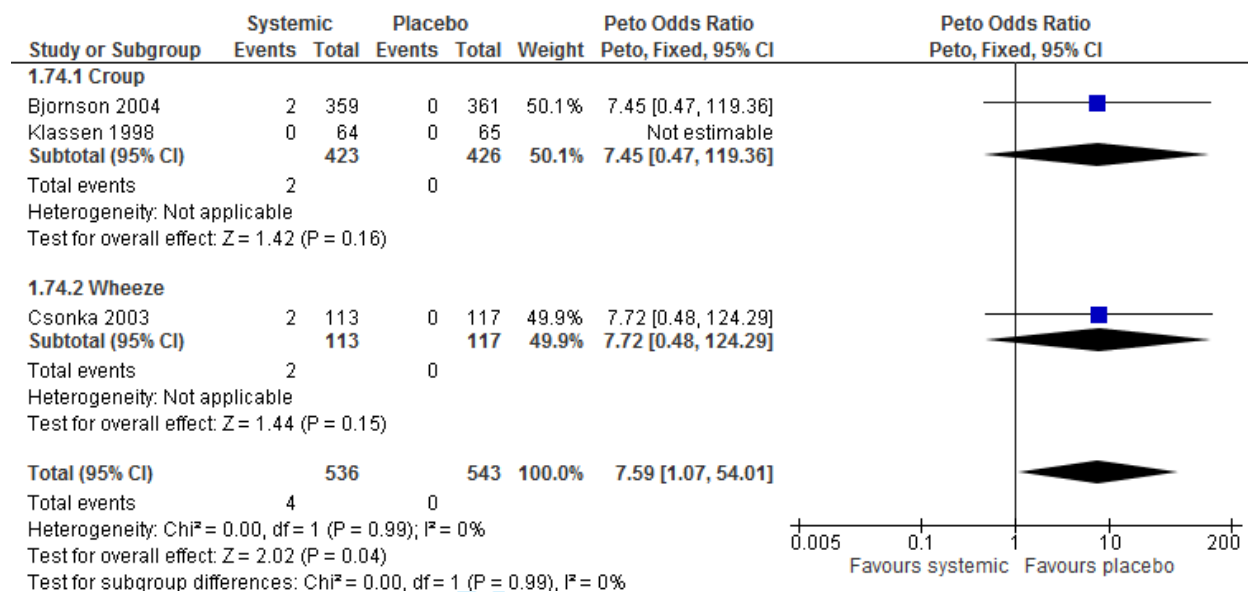

Peer review only

## SYSTEMIC vs. PLACEBO – Endocrine/Metabolic & Musculoskeletal

### Fluid & electrolyte abnormalities

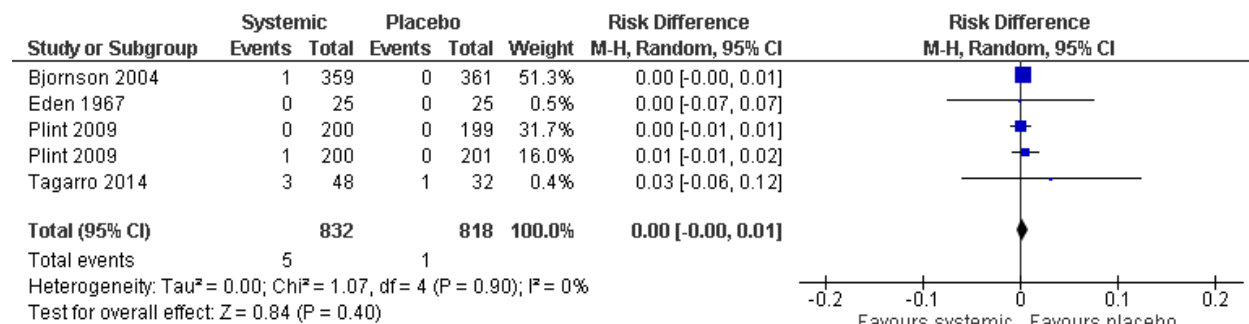

### Fluid & electrolyte abnormalities – Peto

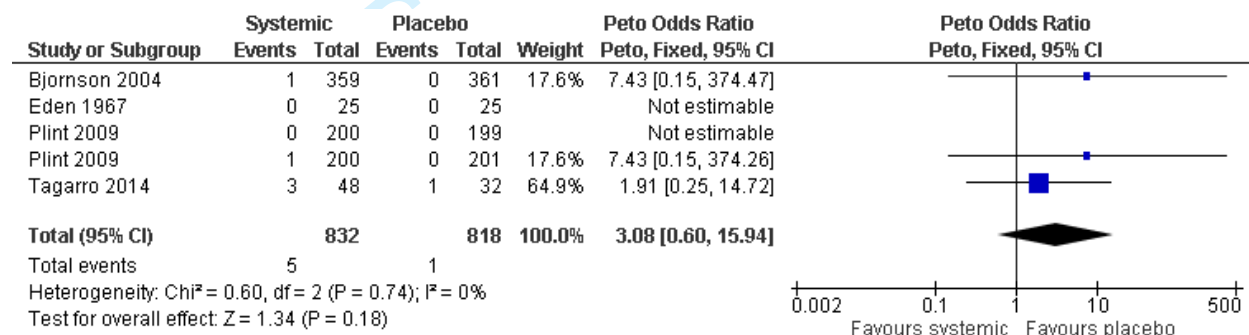

### Fluid & electrolyte abnormalities (by dose)

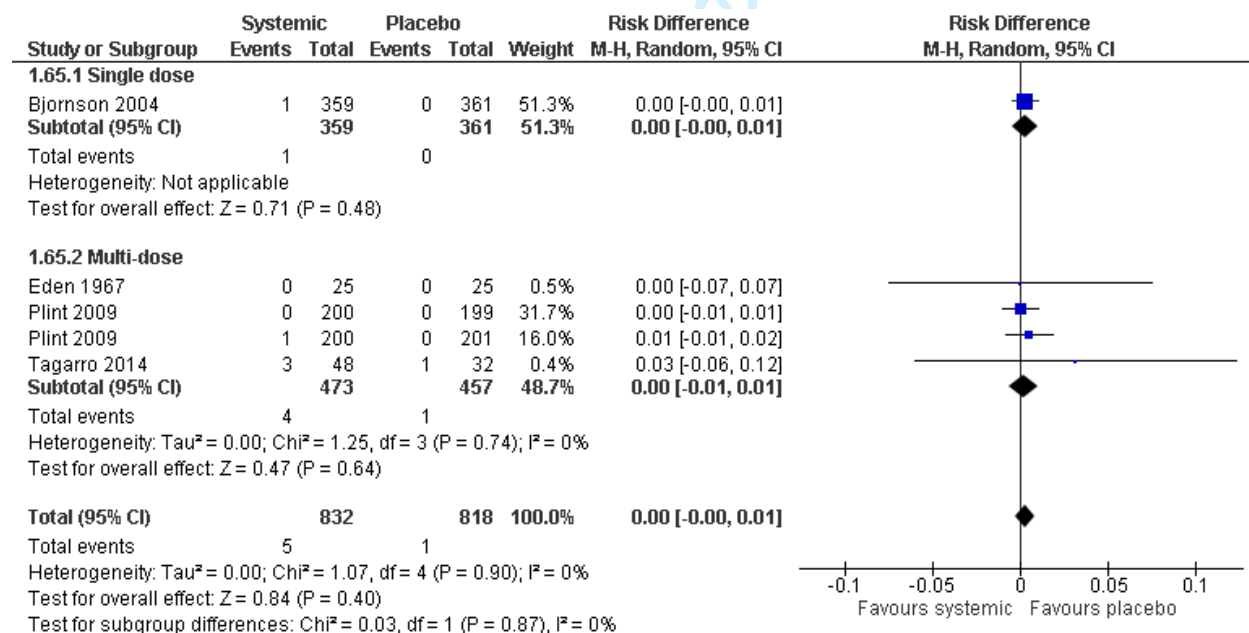

Fluid & electrolyte abnormalities (by dose) – Peto

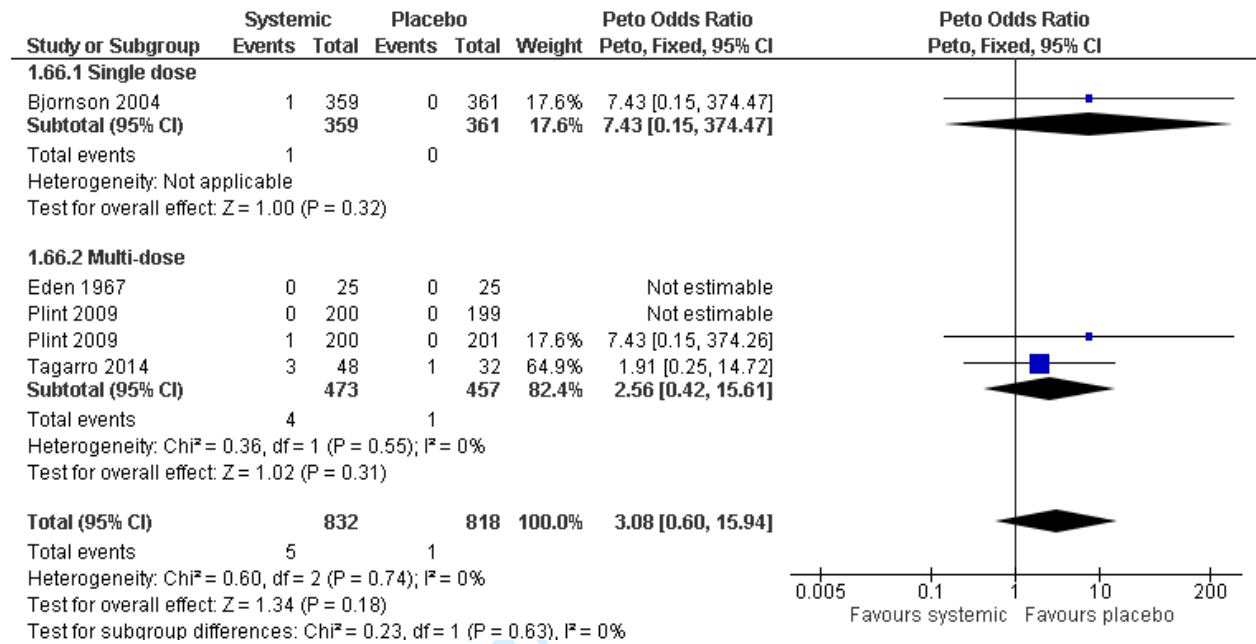

Fluid & electrolyte abnormalities (by condition)

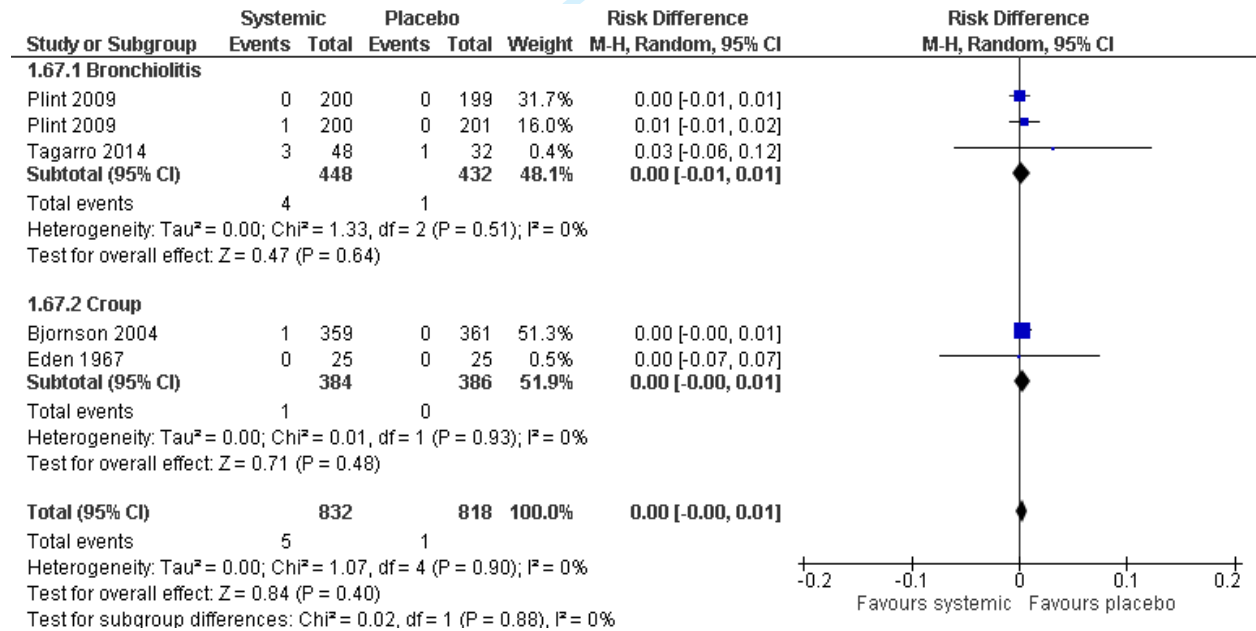

## Fluid &amp; electrolyte abnormalities (by condition) - Peto

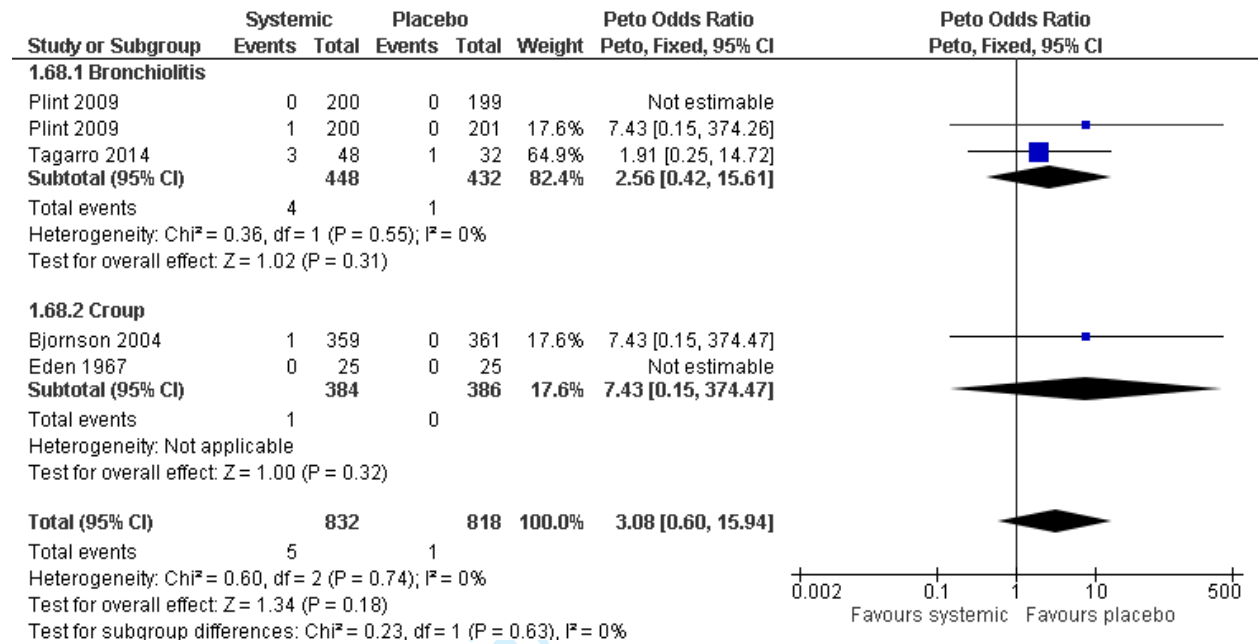

**SYSTEMIC vs. PLACEBO – Cardiovascular**

**Arrhythmia**

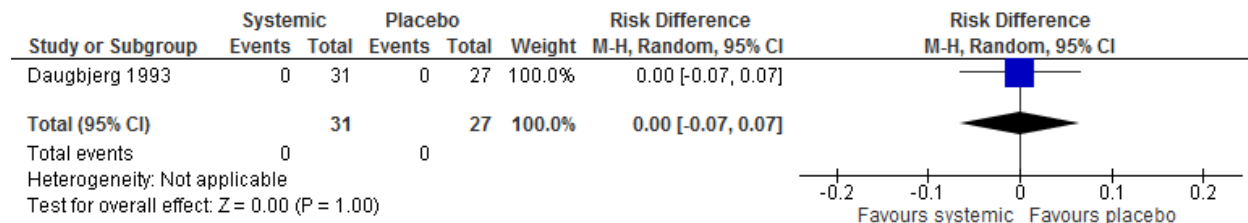

**Arrhythmia - Peto**

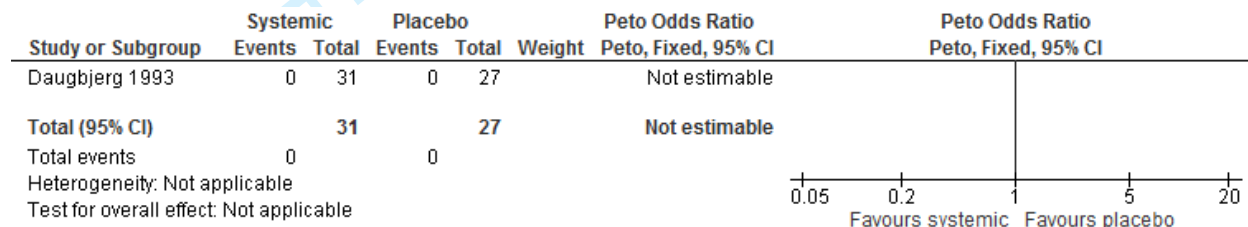

**Hypertension**

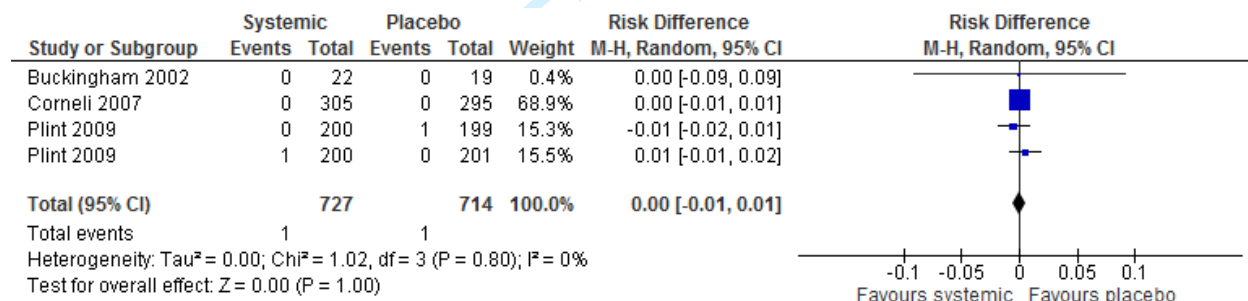

**Hypertension – Peto**

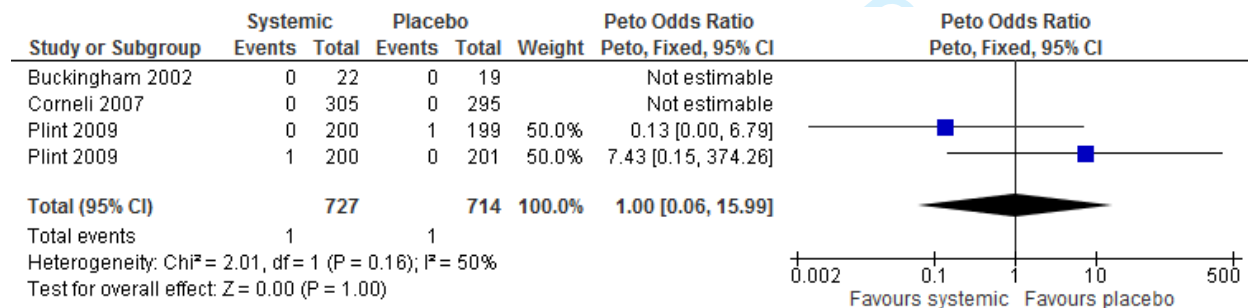

Hypertension (by dose)

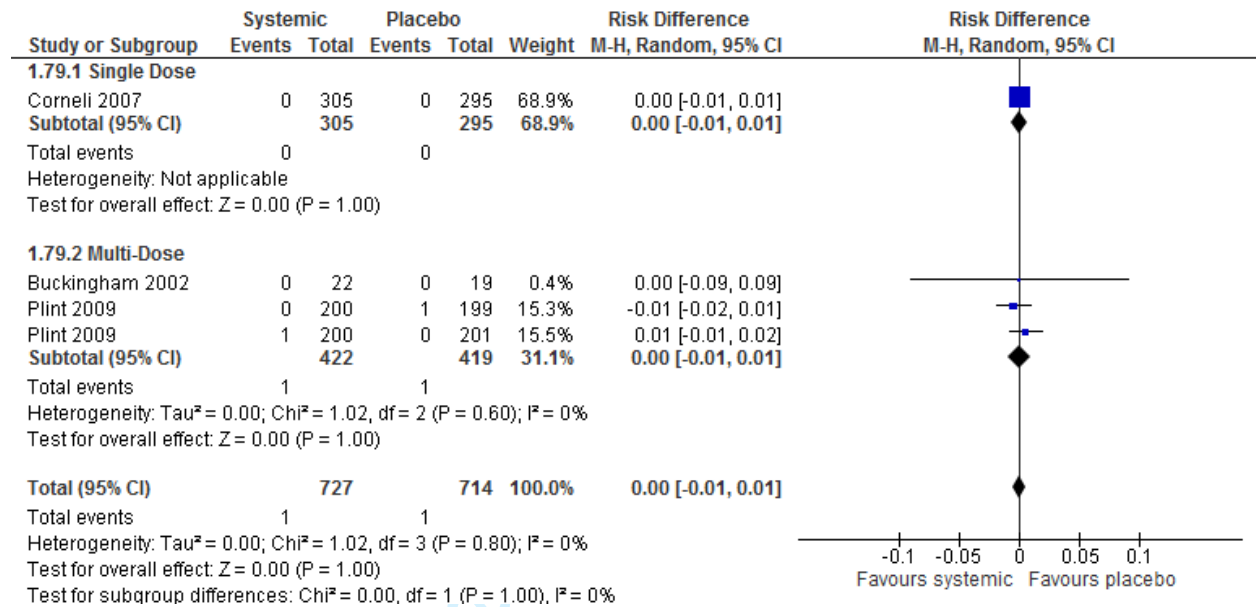

Hypertension (by dose) - Peto

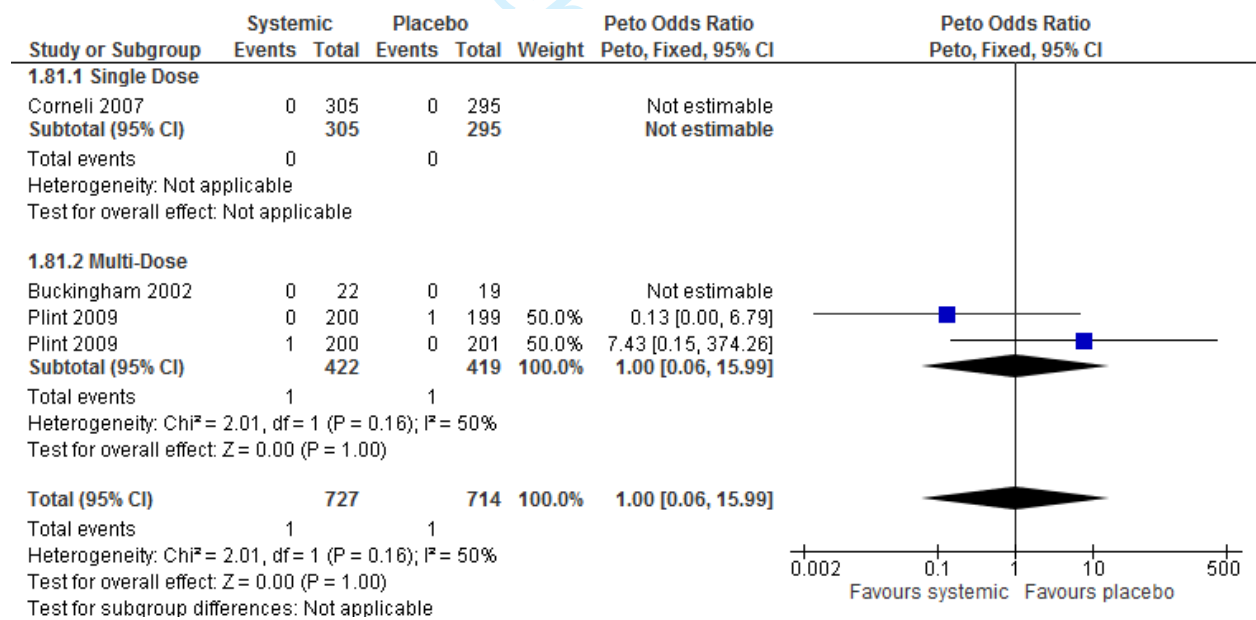

Congestive heart failure

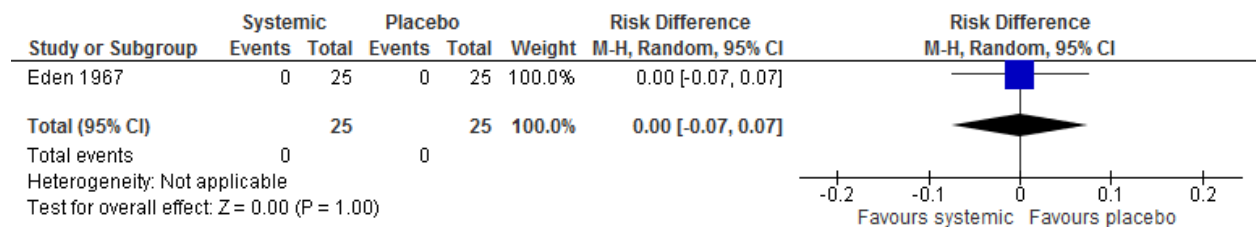



Congestive heart failure - Peto

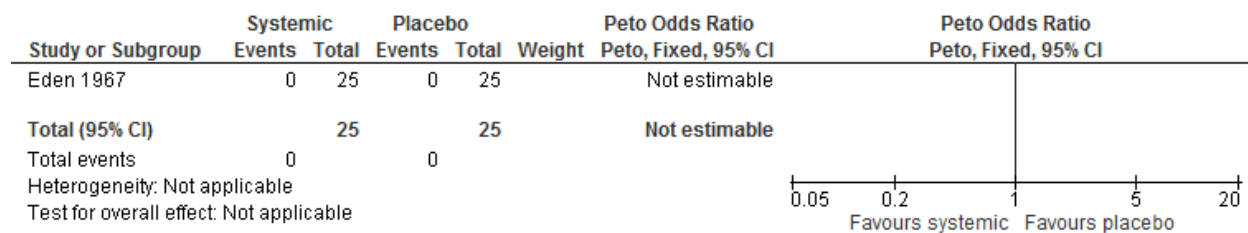

For peer review only

**SYSTEMIC vs. PLACEBO – General**

General complaints

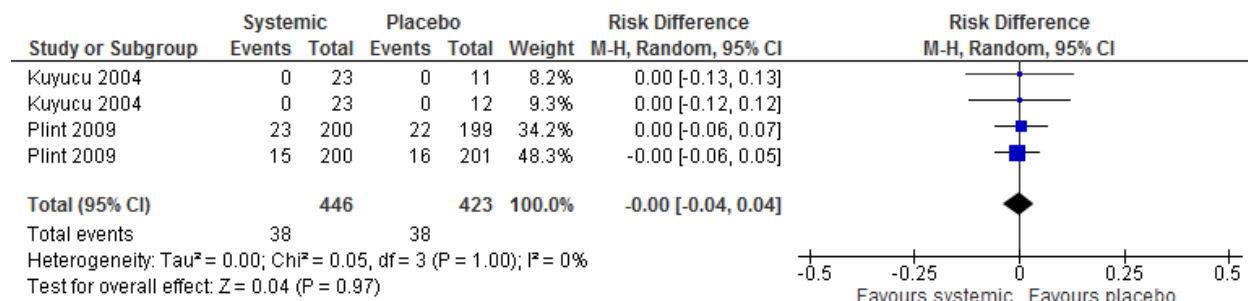

General complaints – Peto

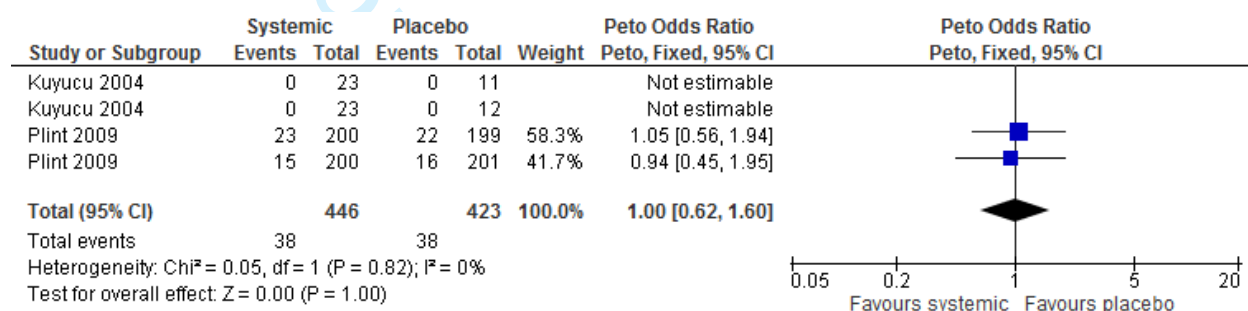

General complaints (by dose)

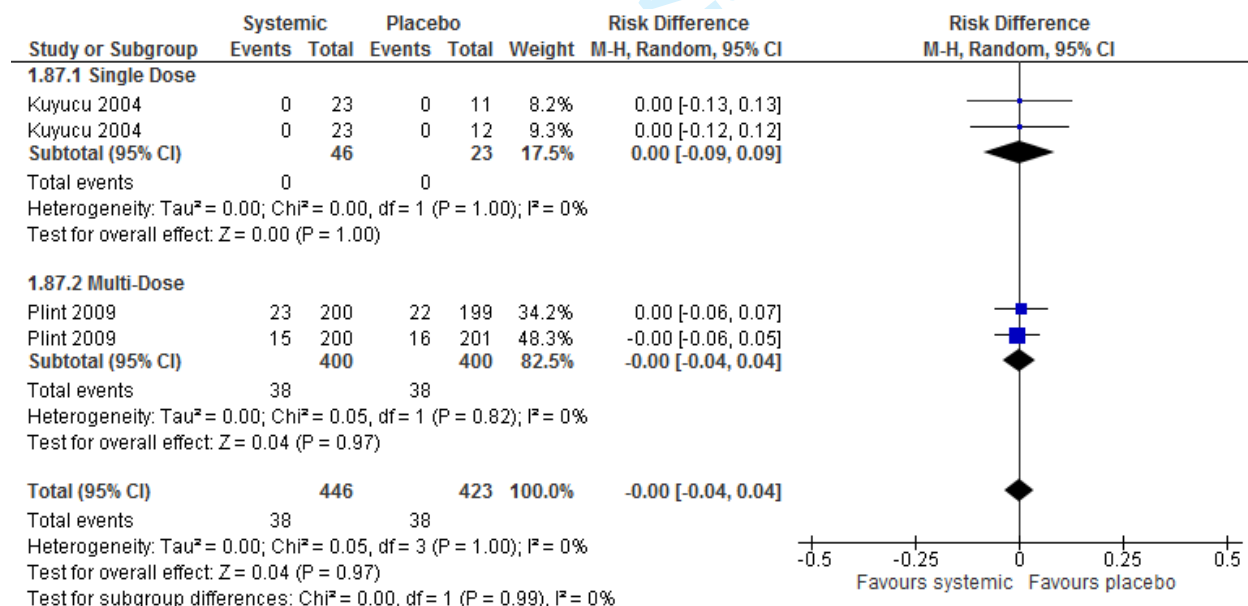

General complaints (by dose) – Peto

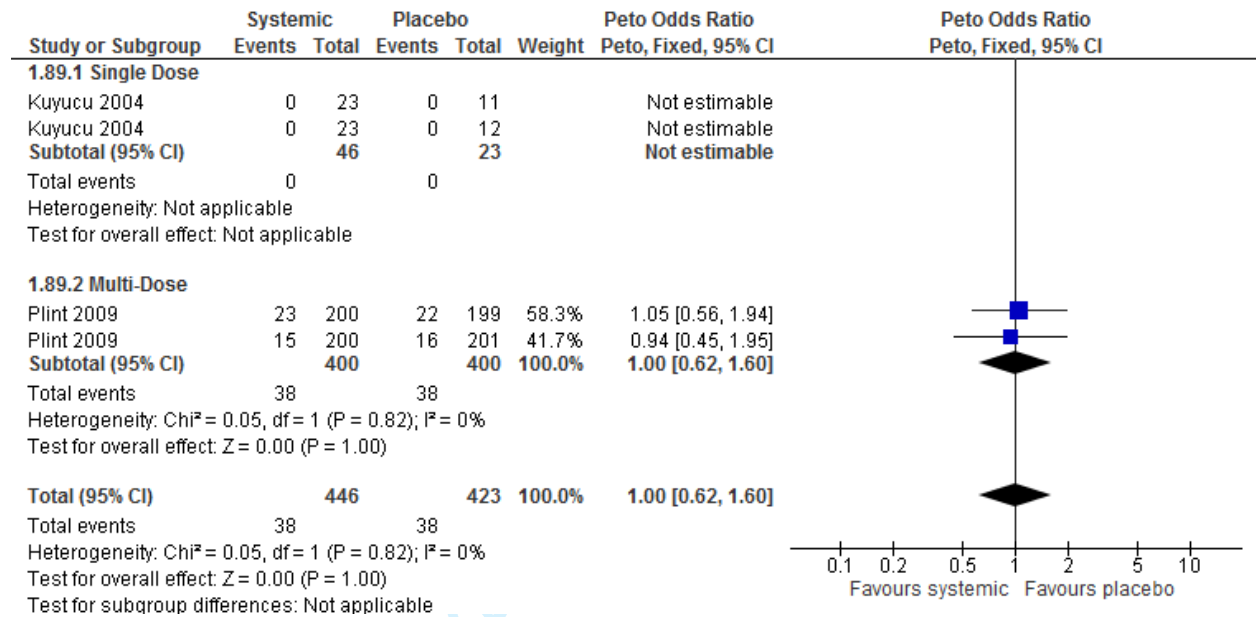

Peer review only

**SYSTEMIC vs. PLACEBO – Immune System**

Immunosuppression

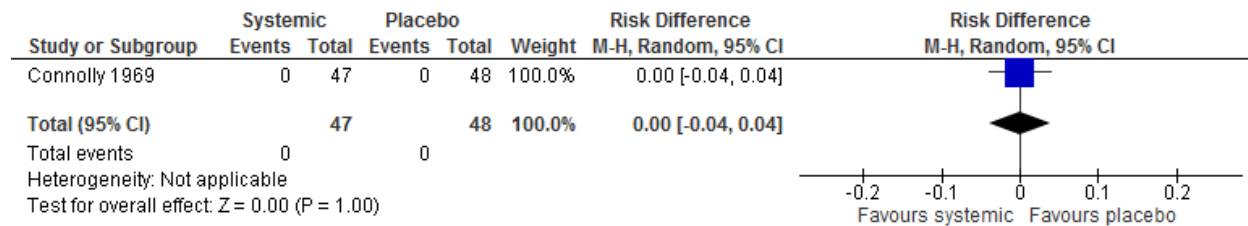

Immunosuppression – Peto

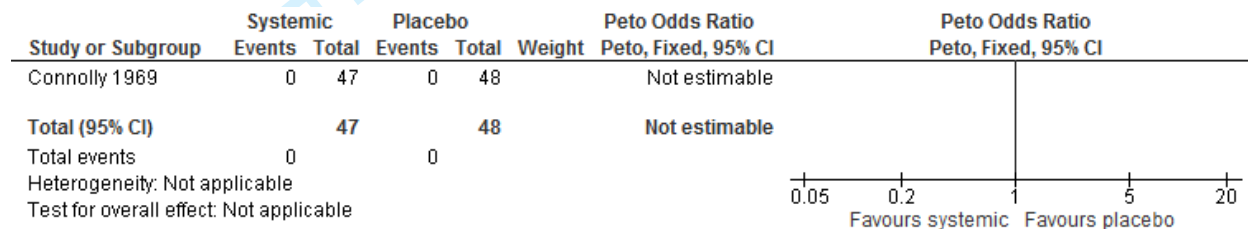

Peer review only

**INHALED vs. PLACEBO – Infection & Respiratory**

**Severe infections**

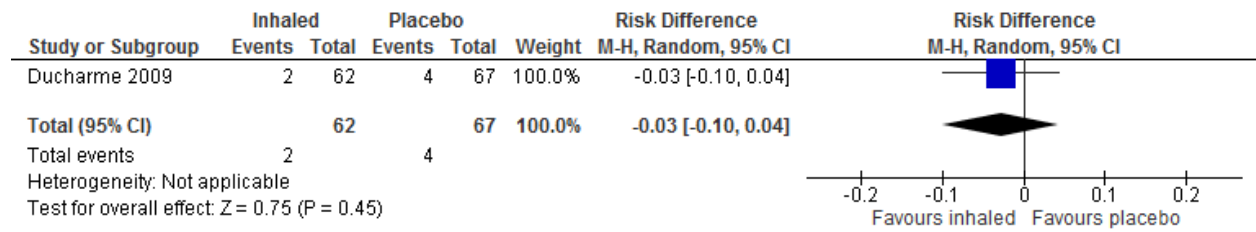

**Severe infections – Peto**

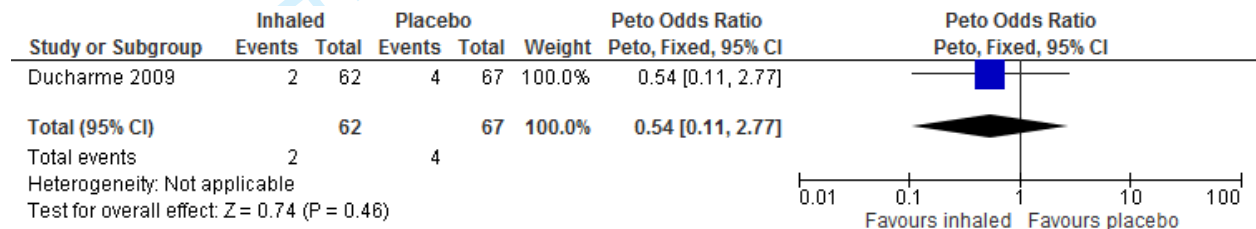

**Systemic infections**

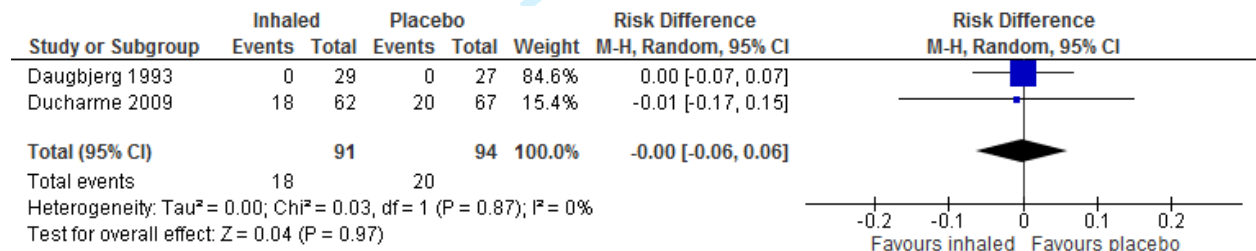

**Systemic infections – Peto**

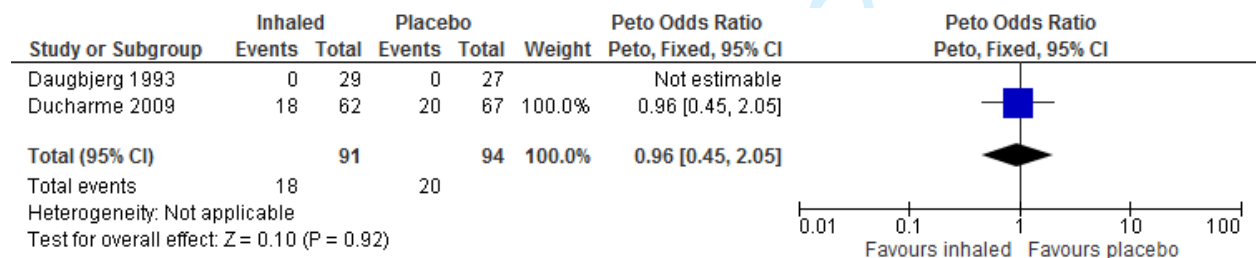

**Lung/trachea**

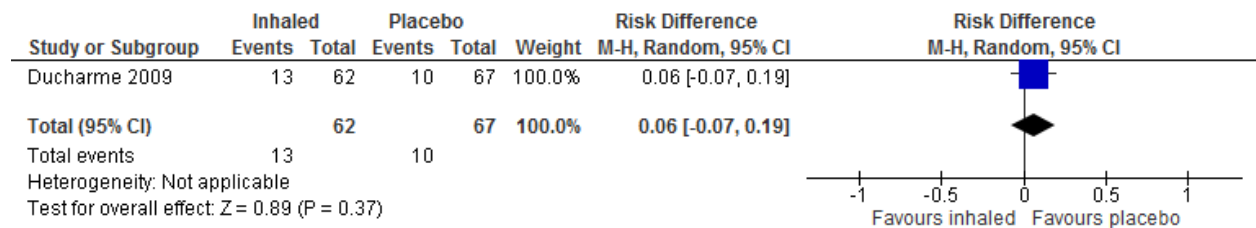

Lung/trachea – Peto

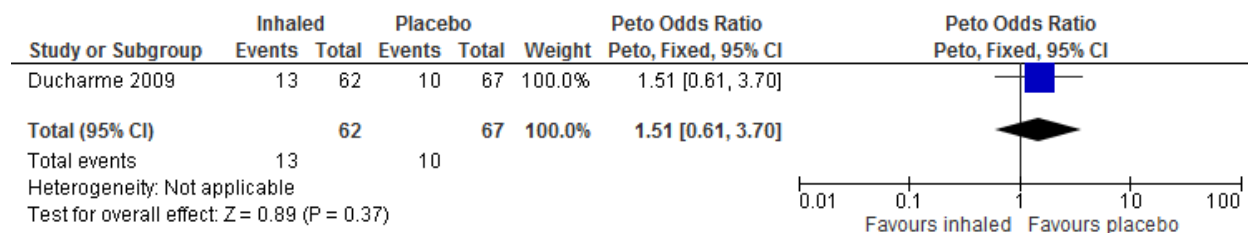

URT

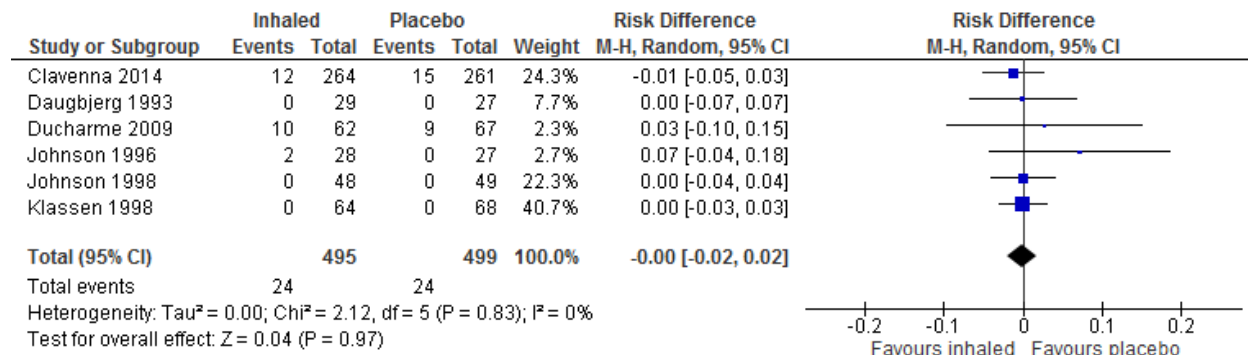

URT – Peto

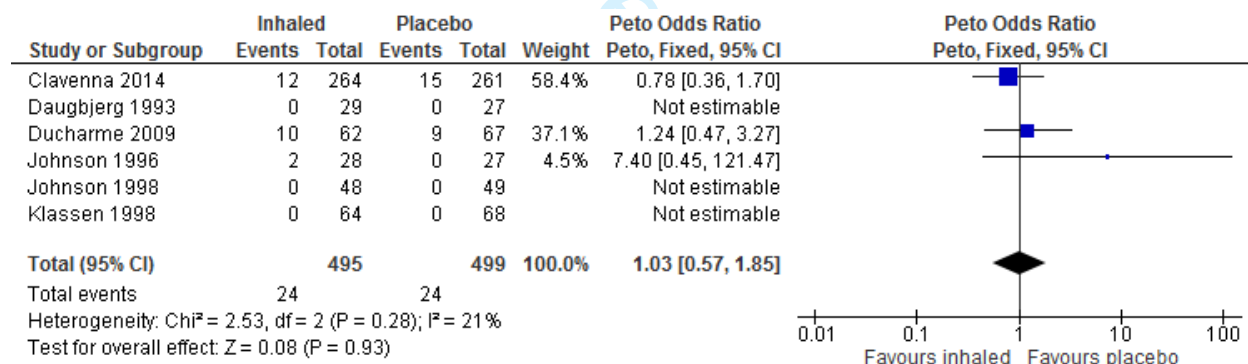

URT (by dose)

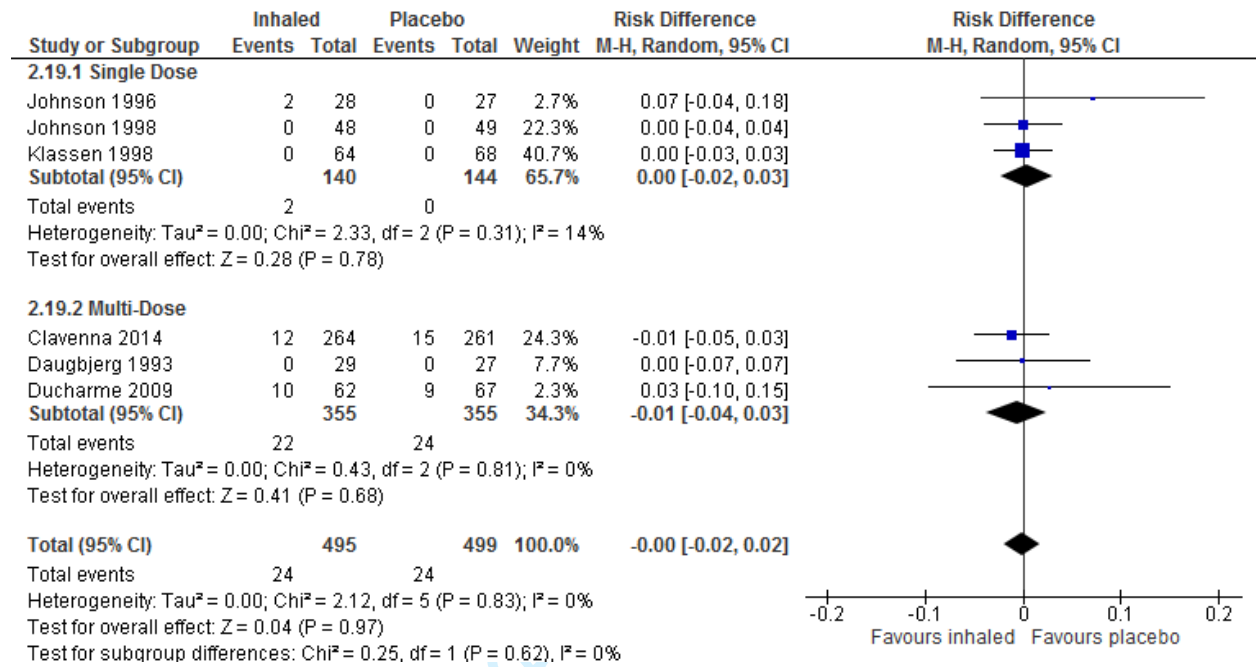

URT (by dose) – Peto

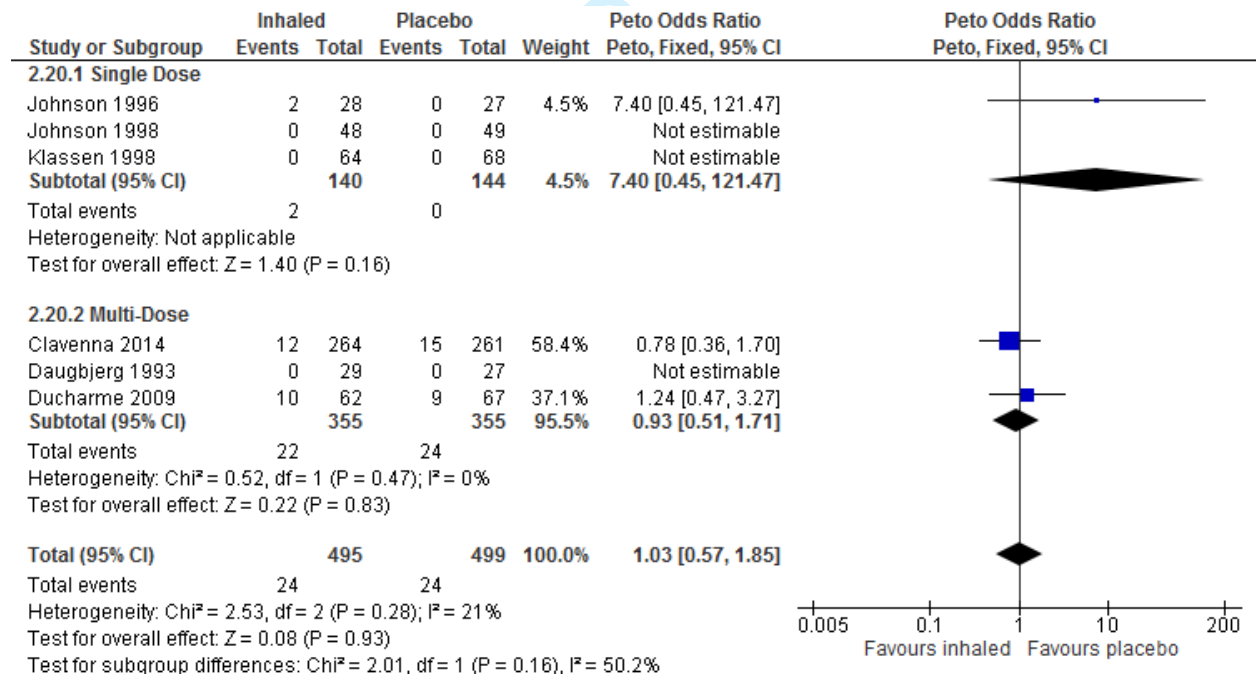

URT (by condition)

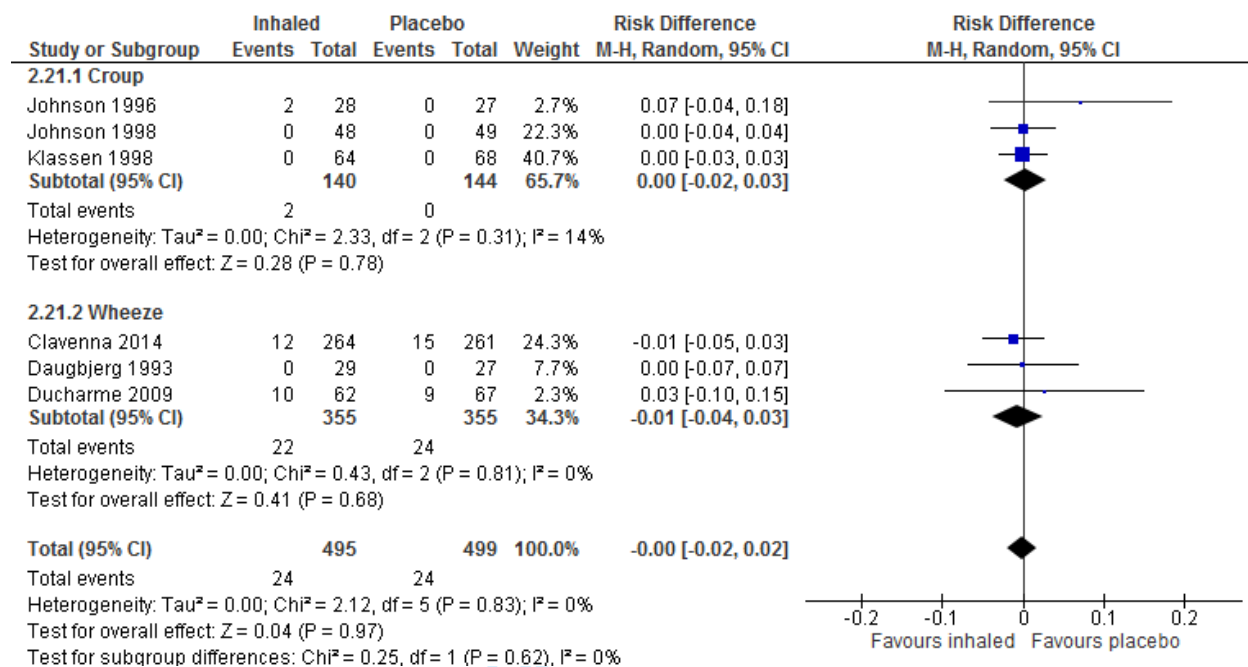

URT (by condition) – Peto

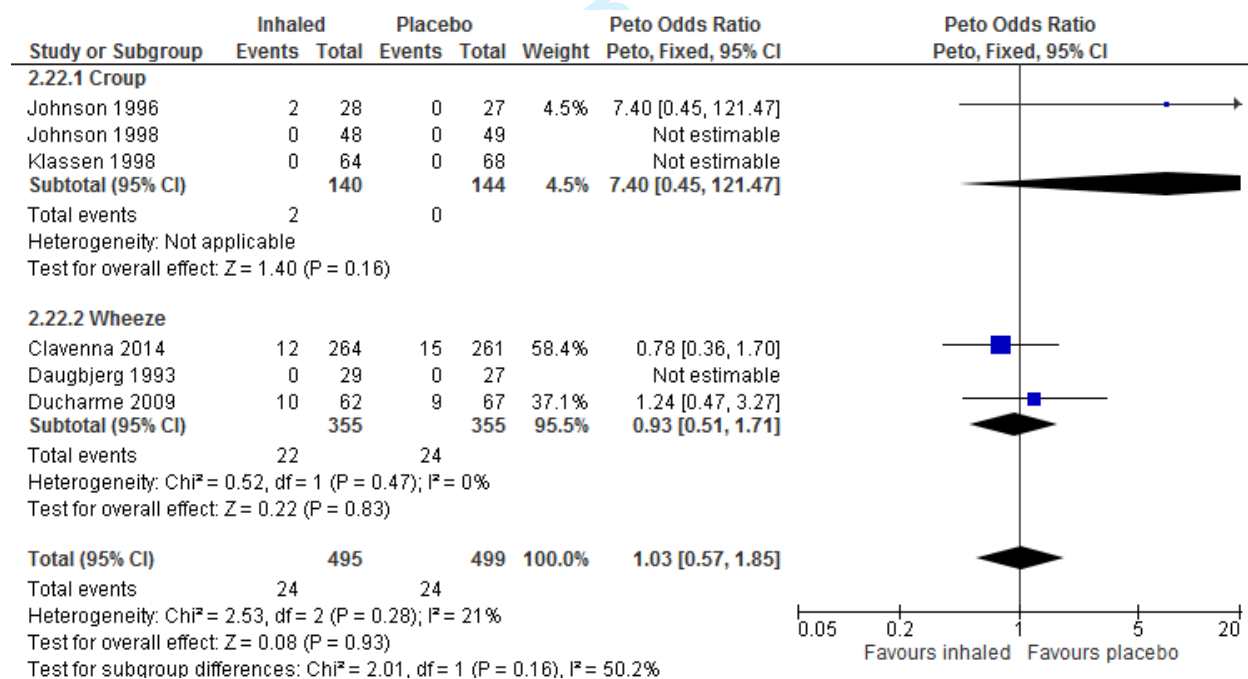



Voice complaints

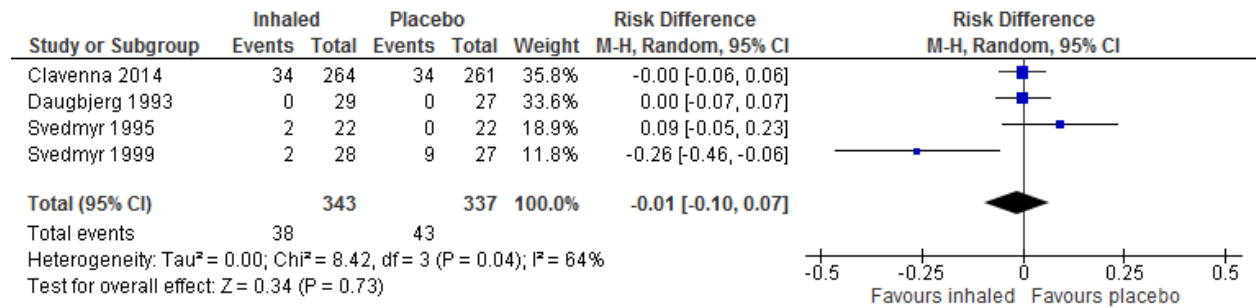

Voice complaints – Peto

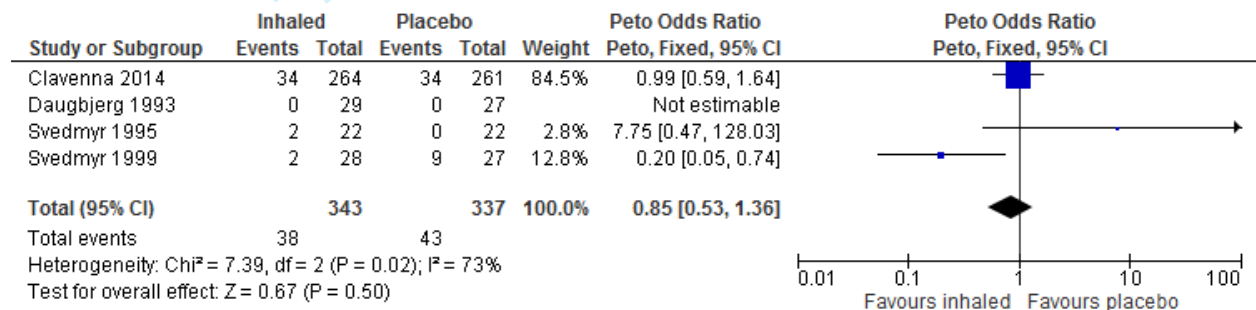

Voice complaints (by condition)

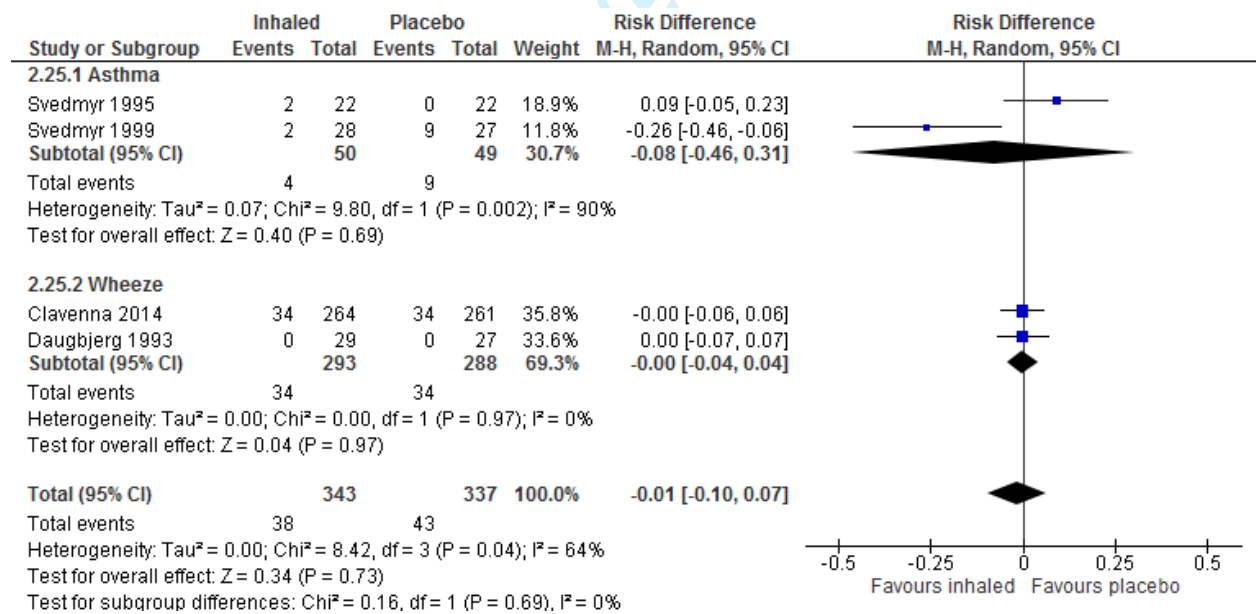

## Voice complaints (by condition) - Peto

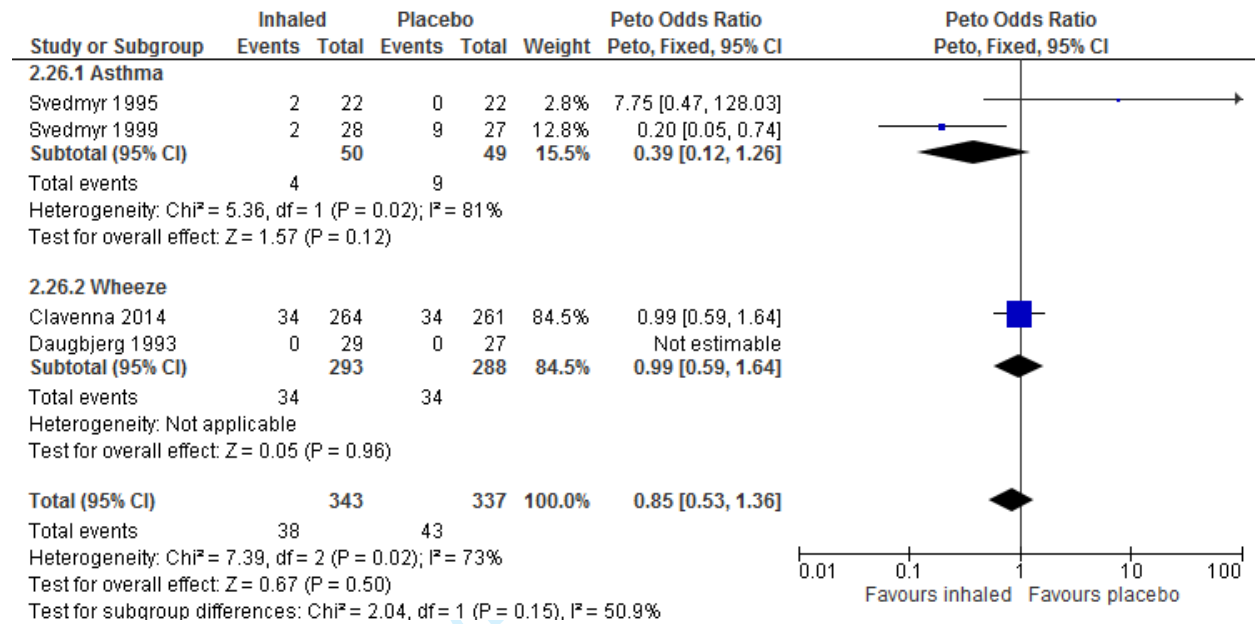

**INHALED vs. PLACEBO – GI**

**GI bleeding**

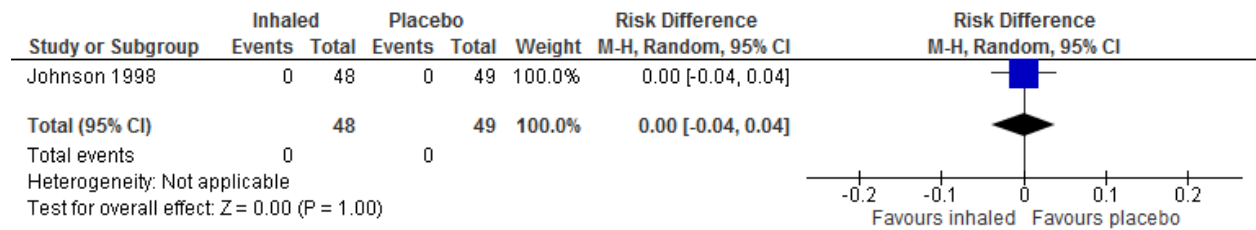

**GI bleeding – Peto**

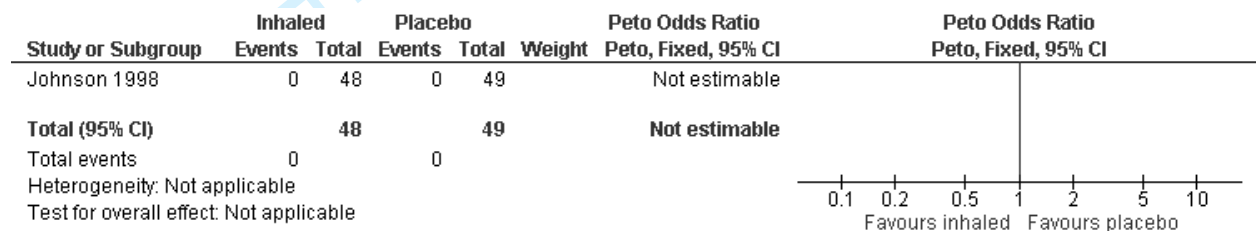

**Vomiting**

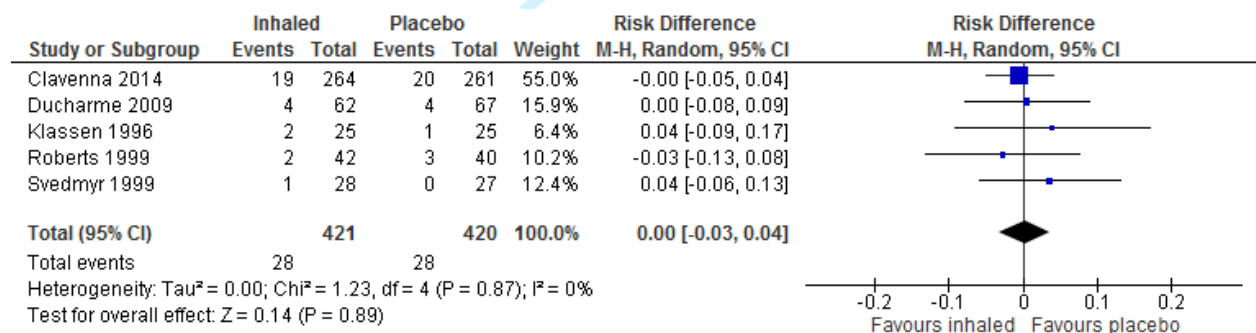

**Vomiting – Peto**

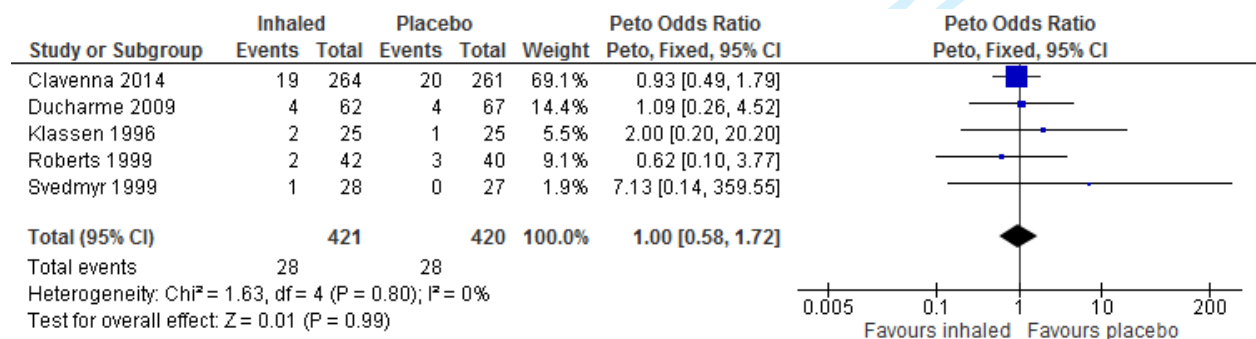

## Vomiting (by dose)

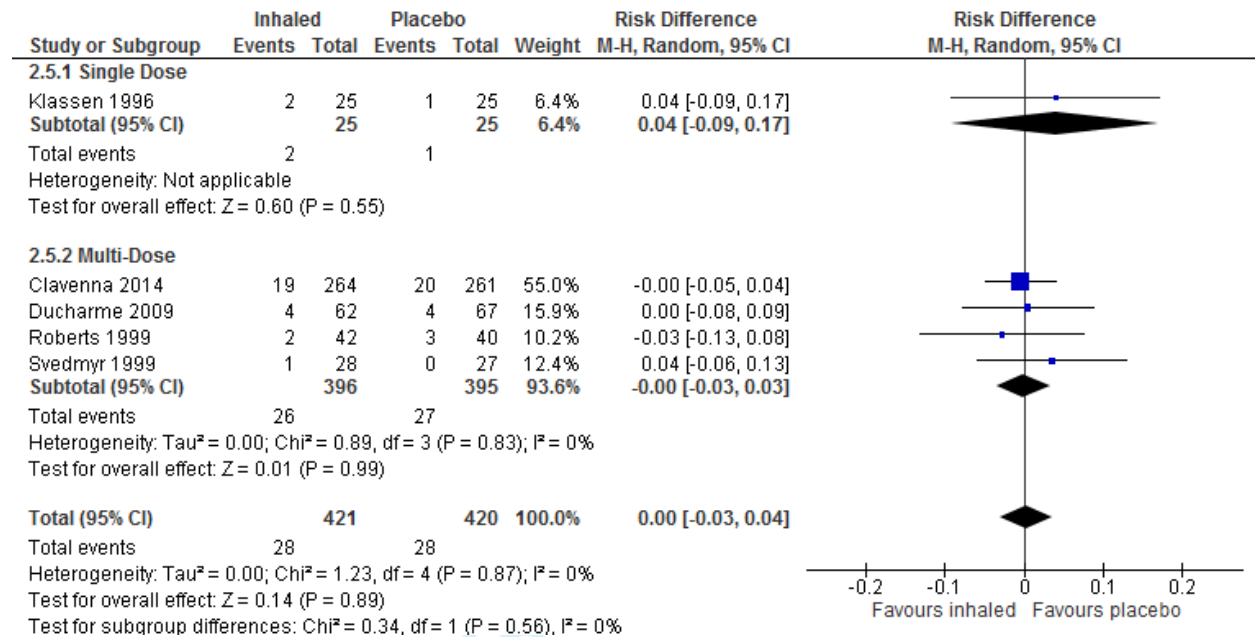

## Vomiting (by dose) – Peto

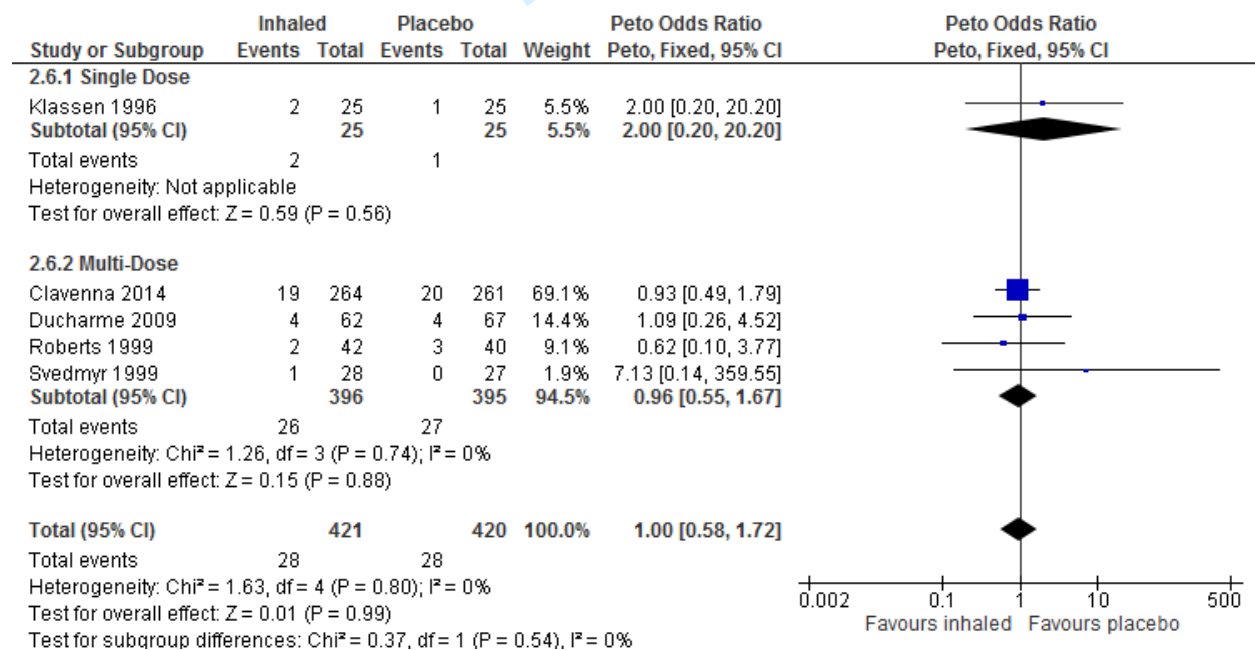

Vomiting (by condition)

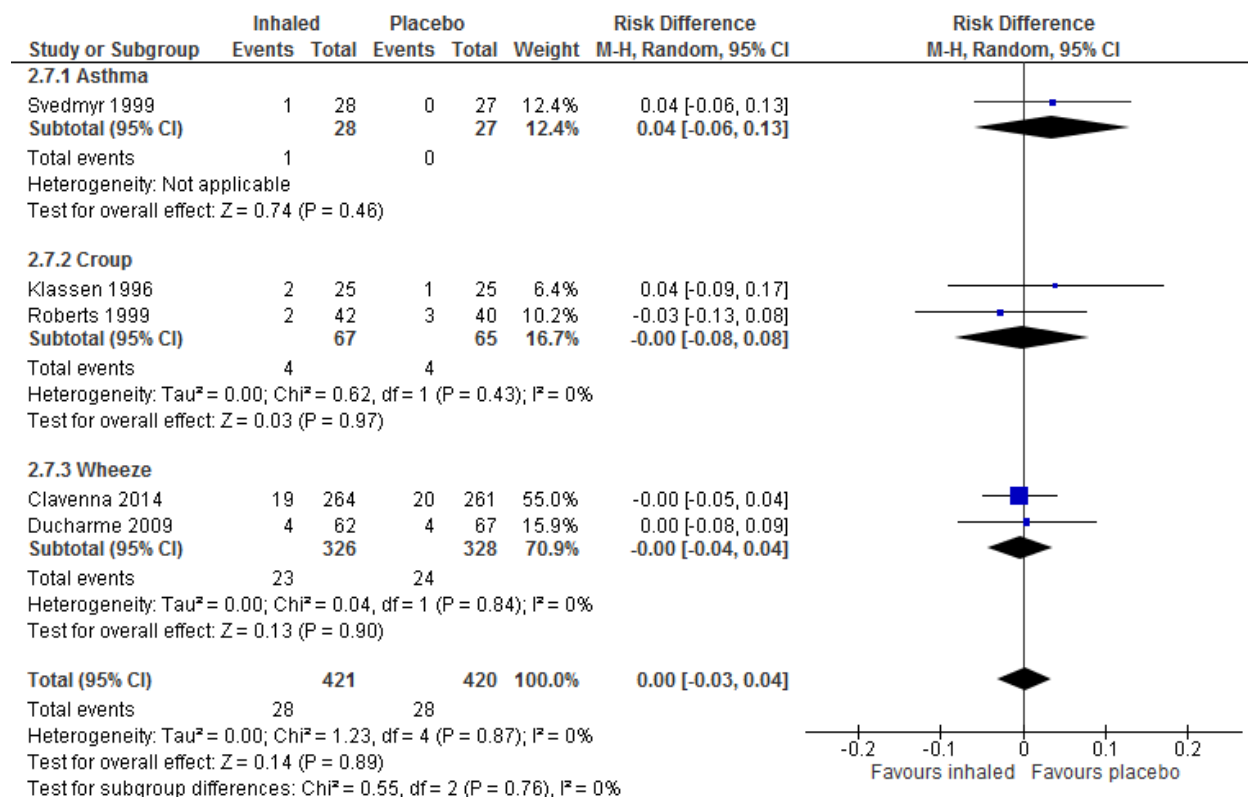

## Vomiting (by condition) - Peto

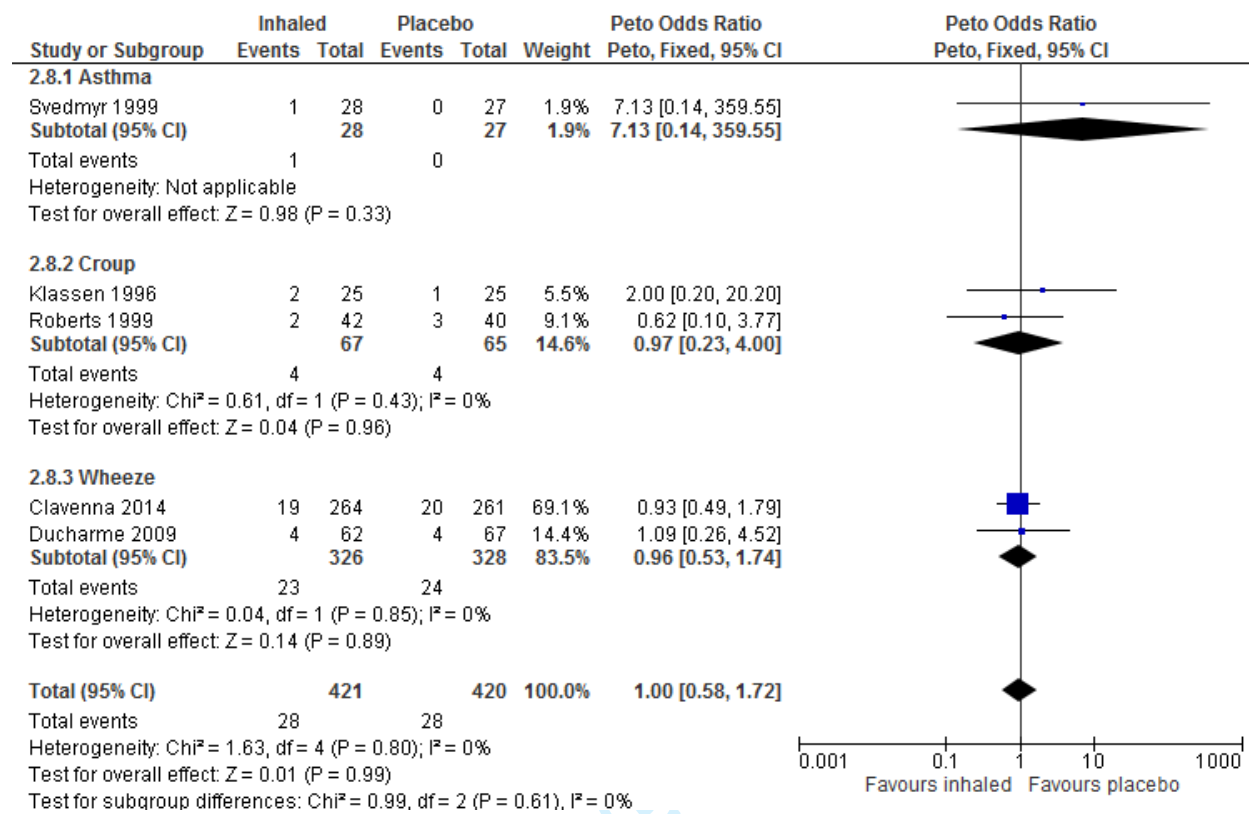

## Diarrhea

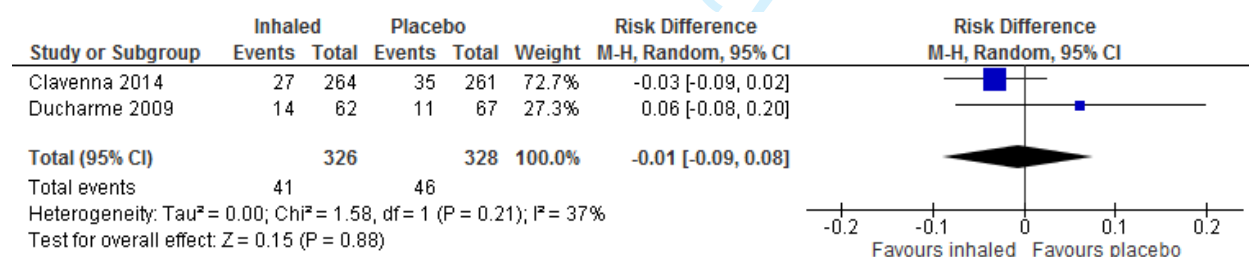

## Diarrhea – Peto

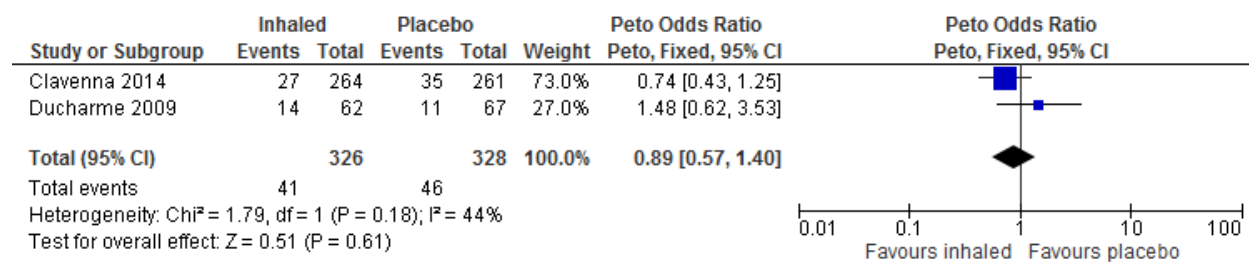

### INHALED vs. PLACEBO – CNS & Behaviour

#### Behaviour change

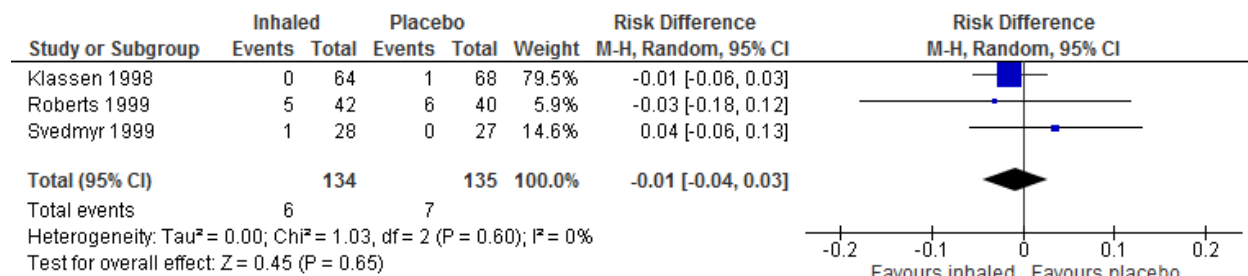

#### Behaviour change – Peto

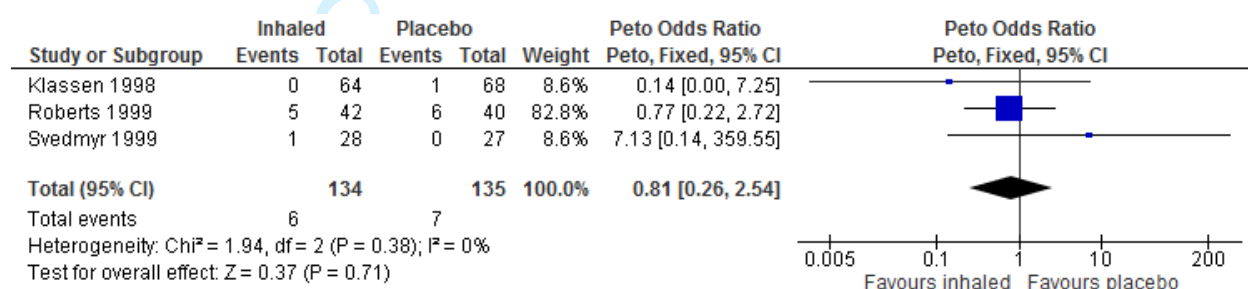

#### Behaviour change (by dose)

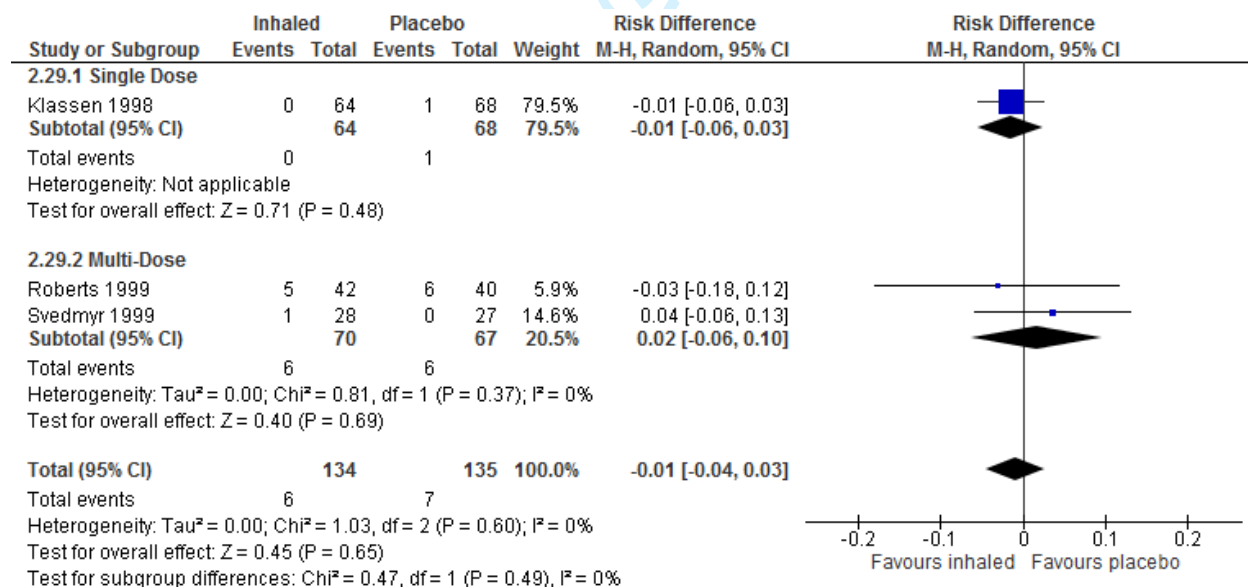

## Behaviour change (by dose) – Peto

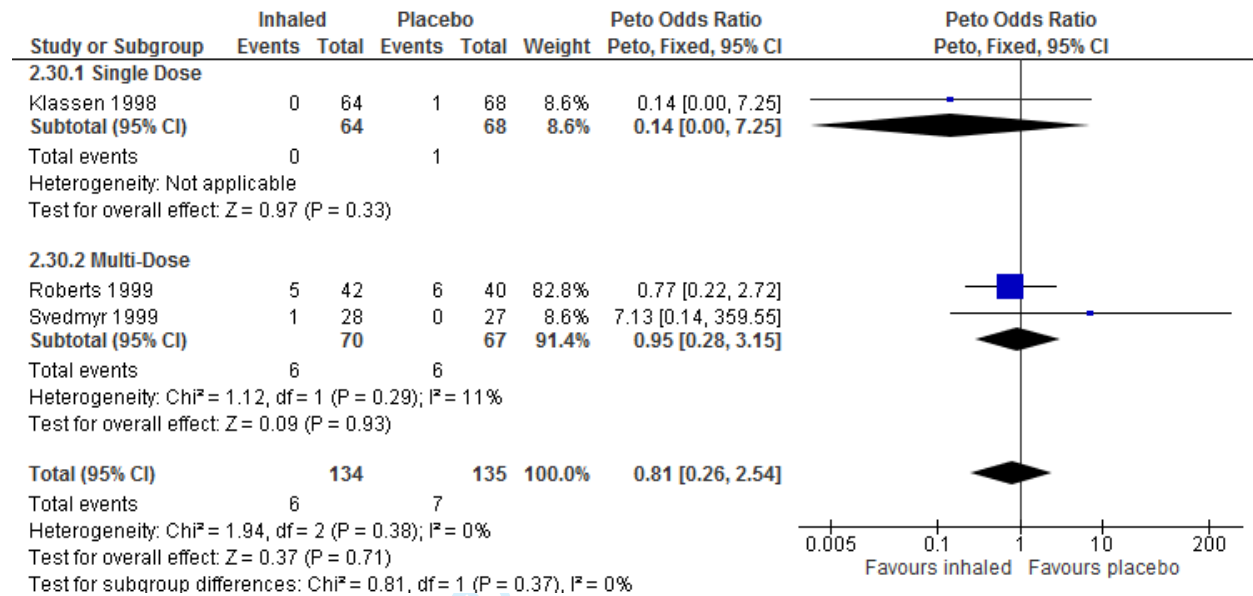

## Behaviour change (by condition)

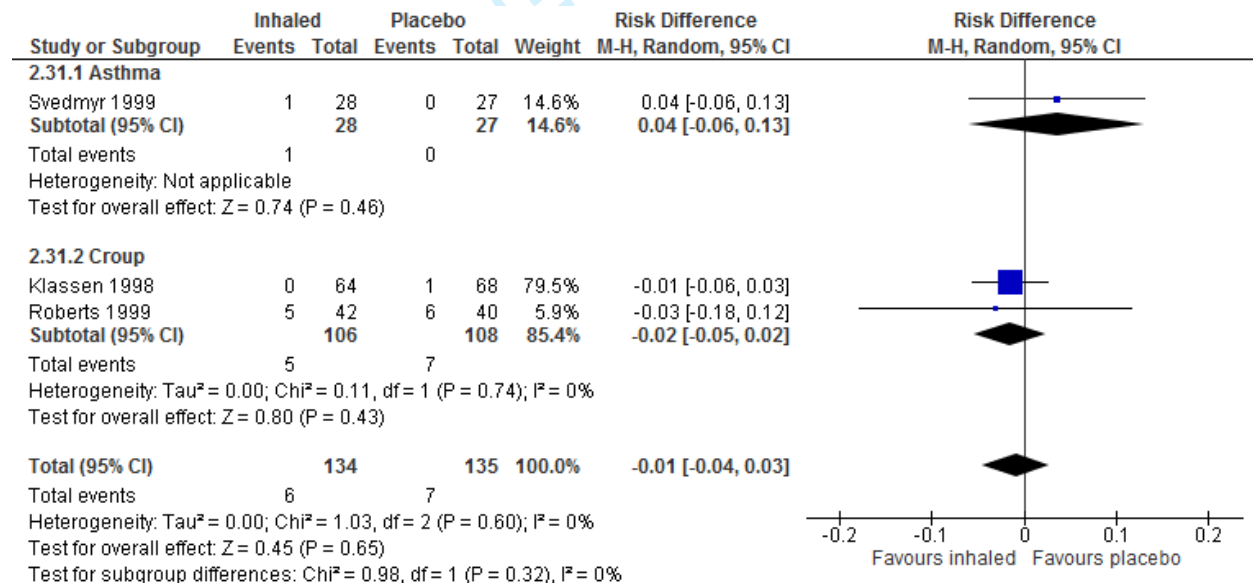



Behaviour change (by condition) – Peto

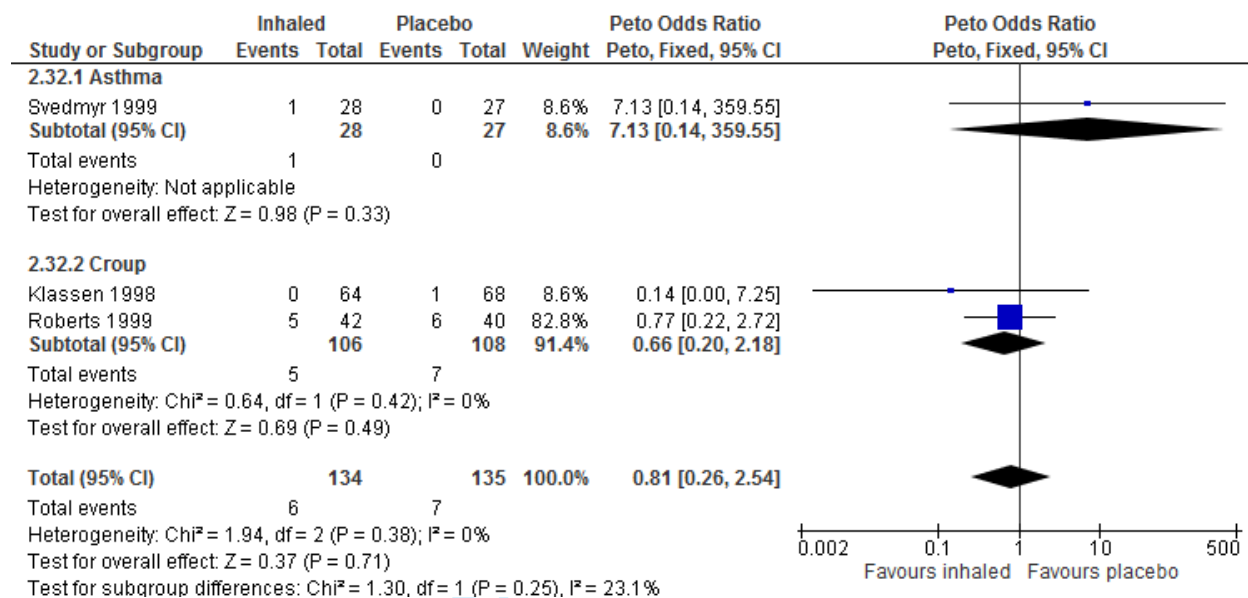

Peer review only

## INHALED vs. PLACEBO – Dermatologic

### Burn

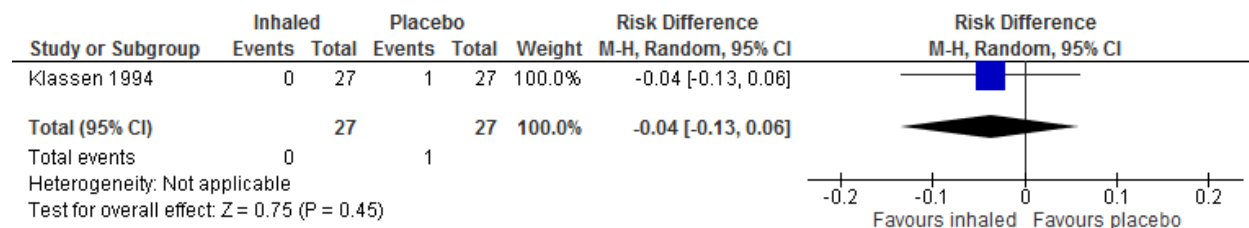

### Burn – Peto

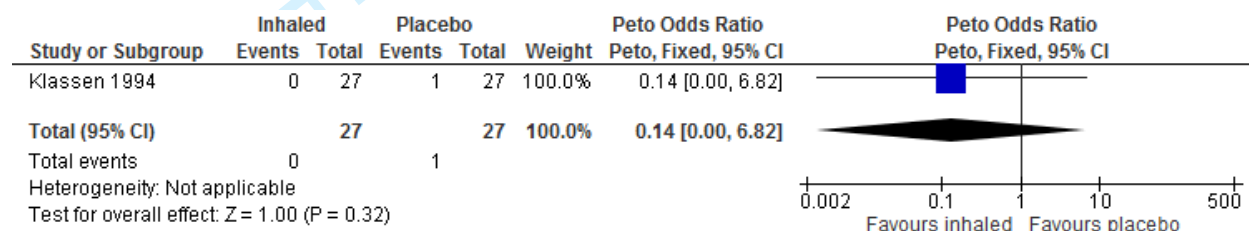

### Integument

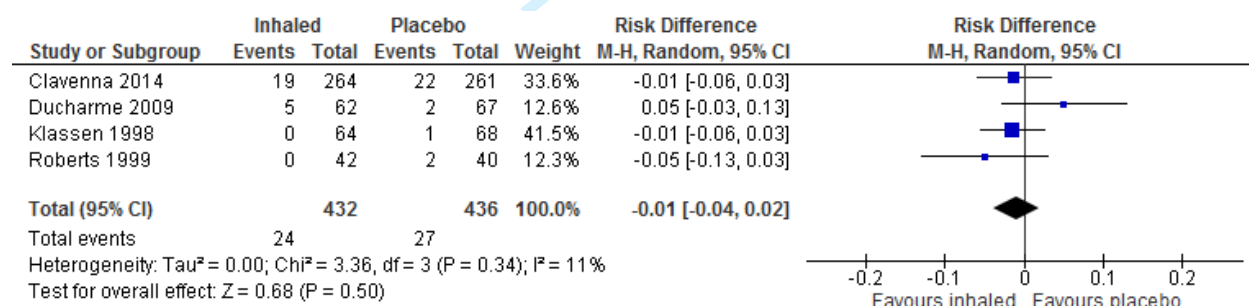

### Integument – Peto

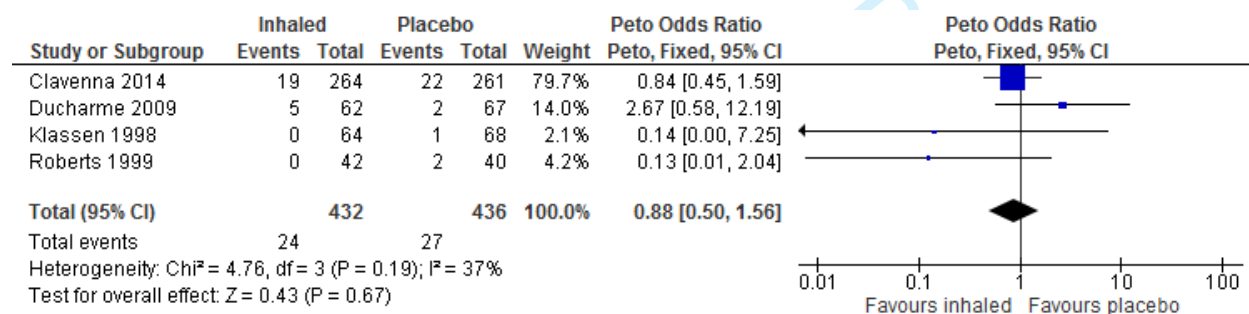

Integument (by dose)

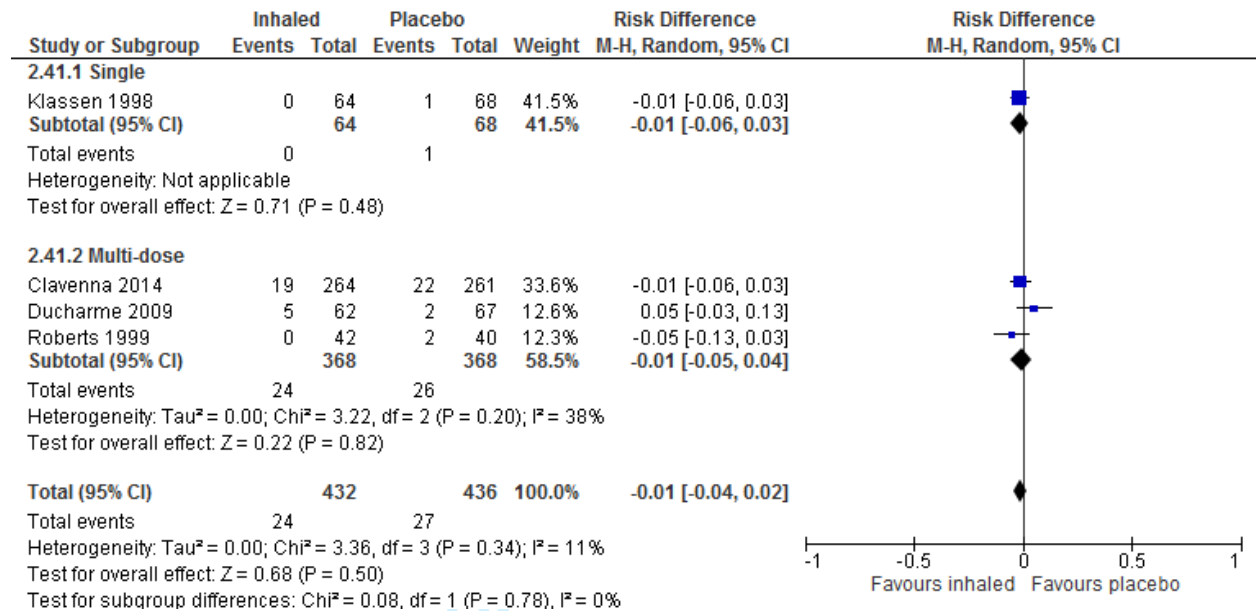

Integument (by dose) – Peto

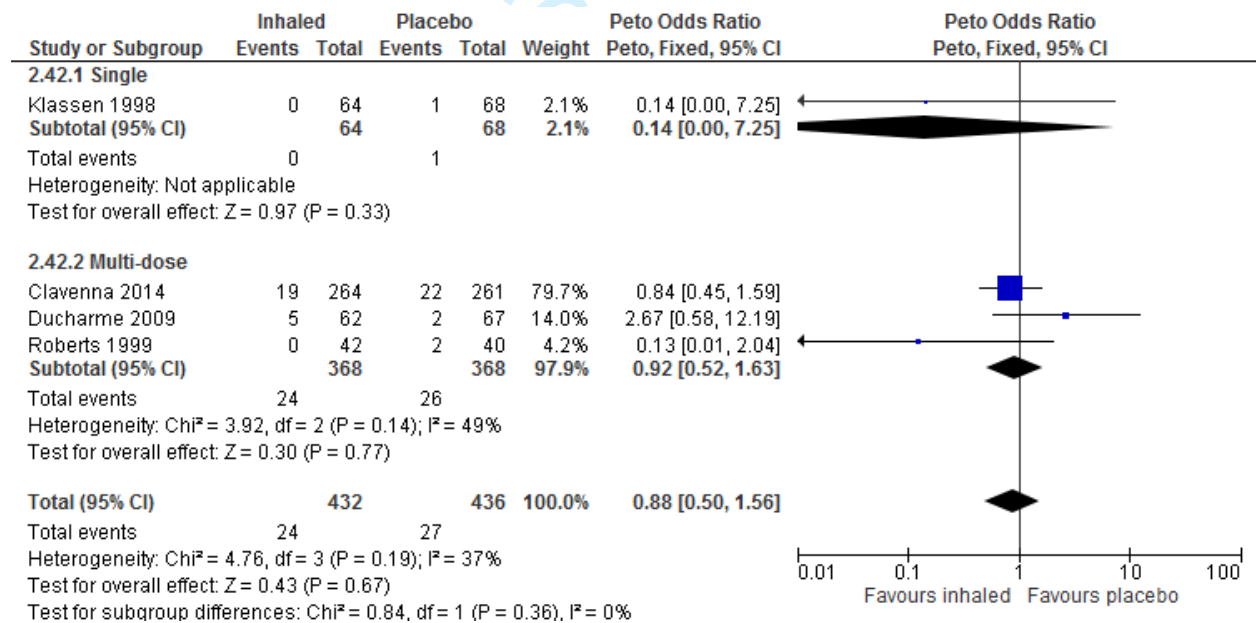

## Integument (by condition)

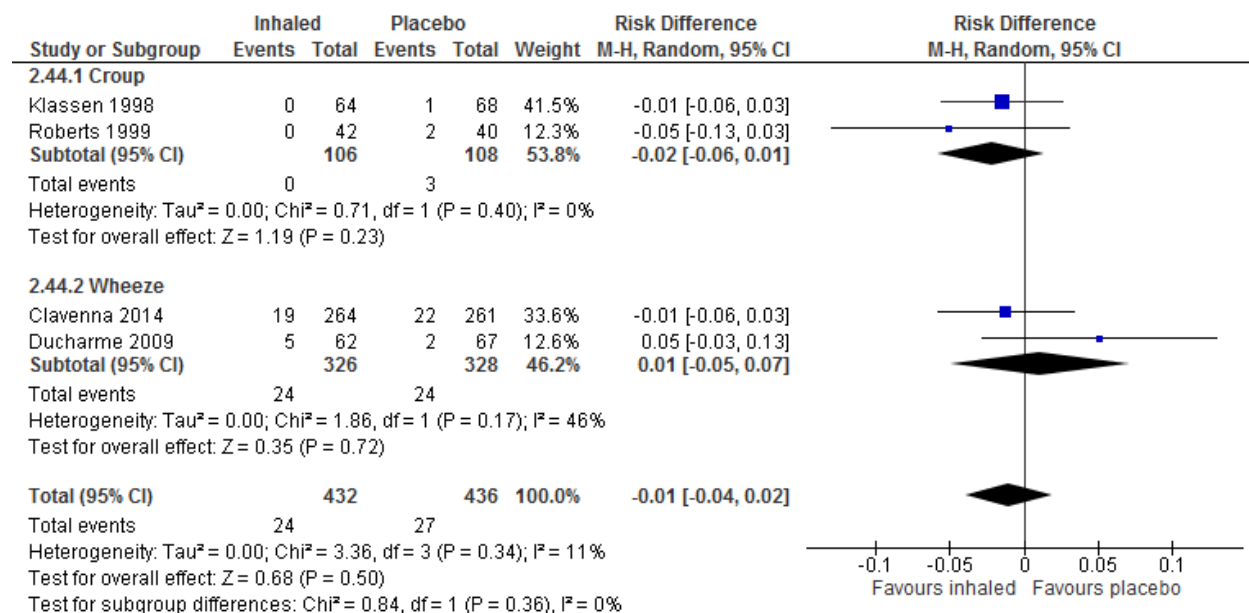

## Integument (by condition) – Peto

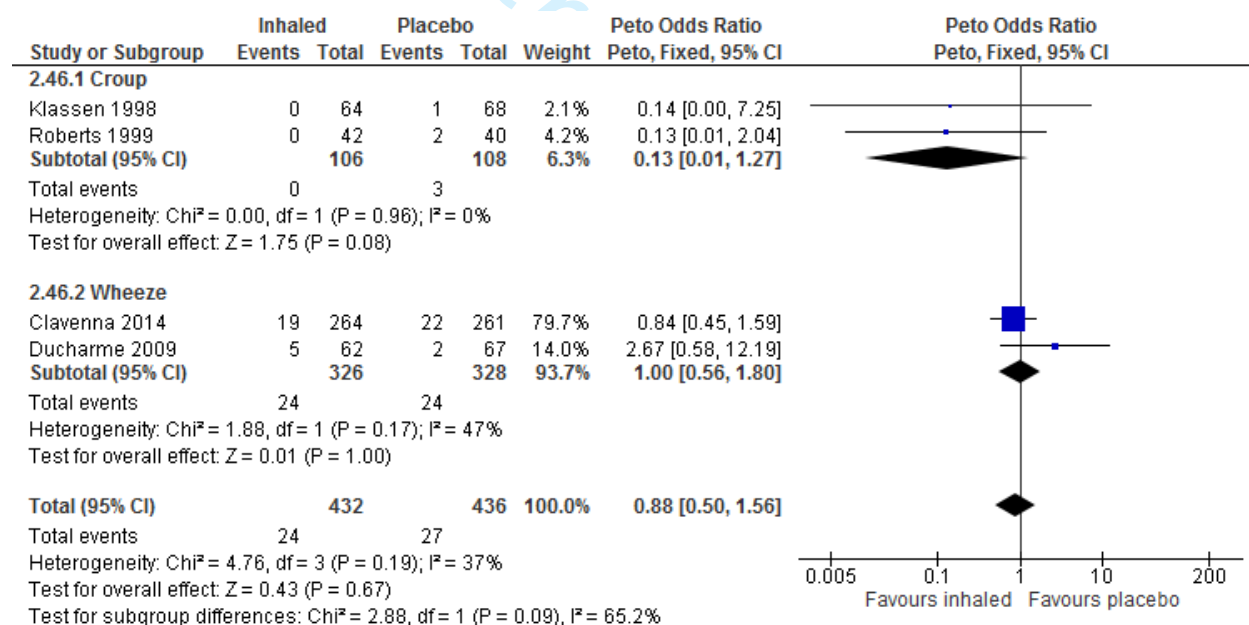

**INHALED vs. PLACEBO – Endocrine/Metabolic & Musculoskeletal**

Growth – change from baseline, cm

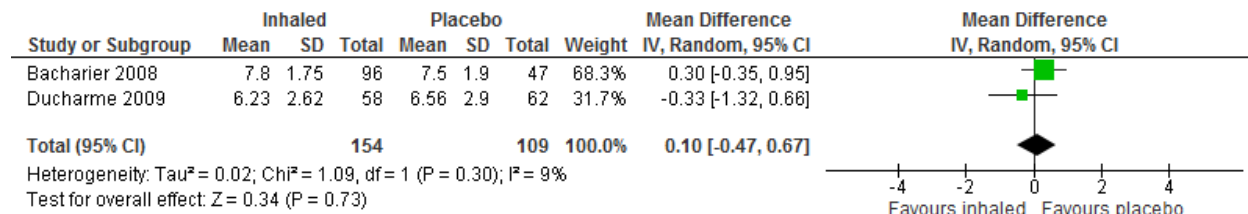

**Adrenal suppression**

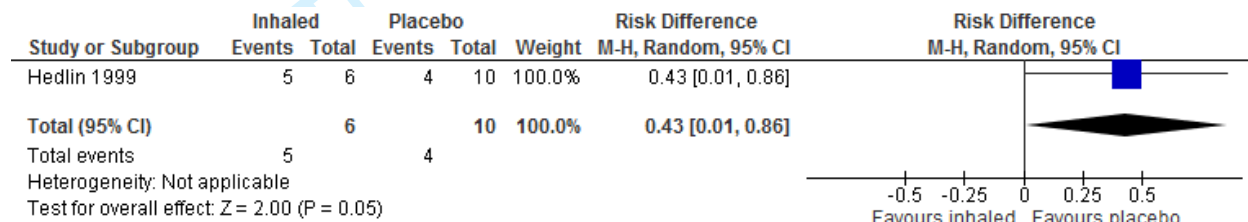

**Adrenal suppression - Peto**

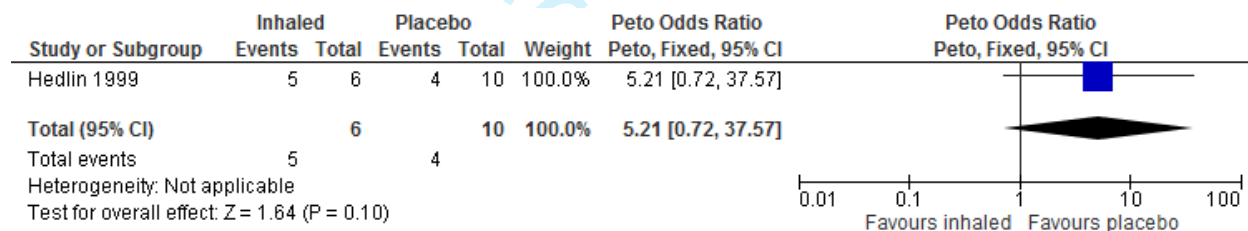

### INHALED vs. PLACEBO – Cardiovascular

#### Arrhythmia

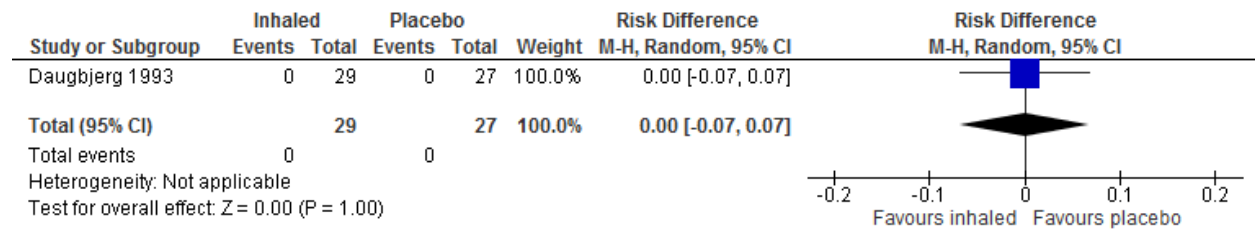

#### Arrhythmia – Peto

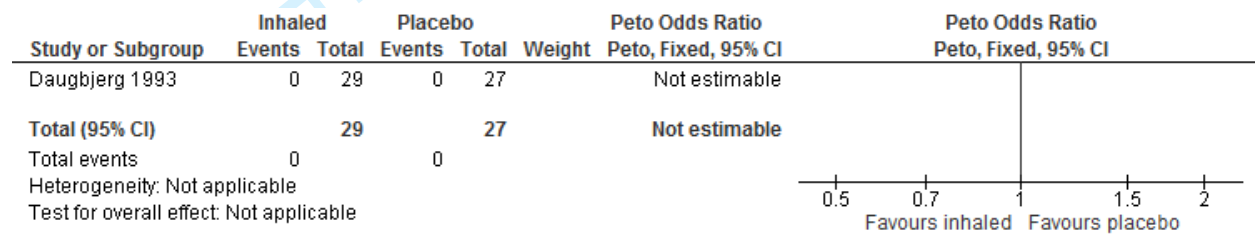

DEXAMETHASONE vs. OTHER STEROID – GI

Vomiting

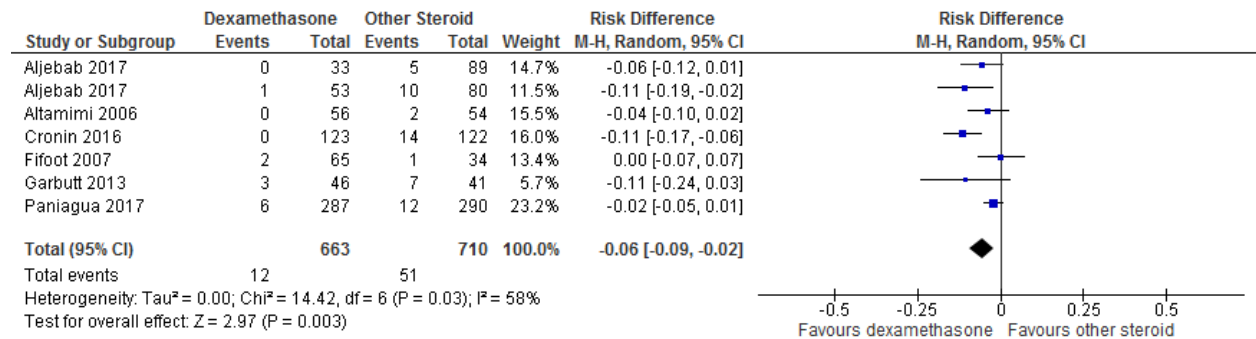

Vomiting – Peto

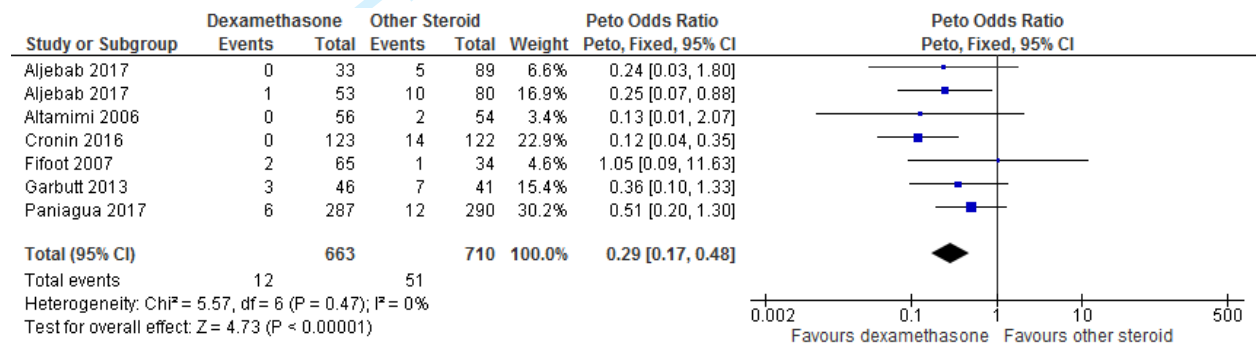

Vomiting (by dose)

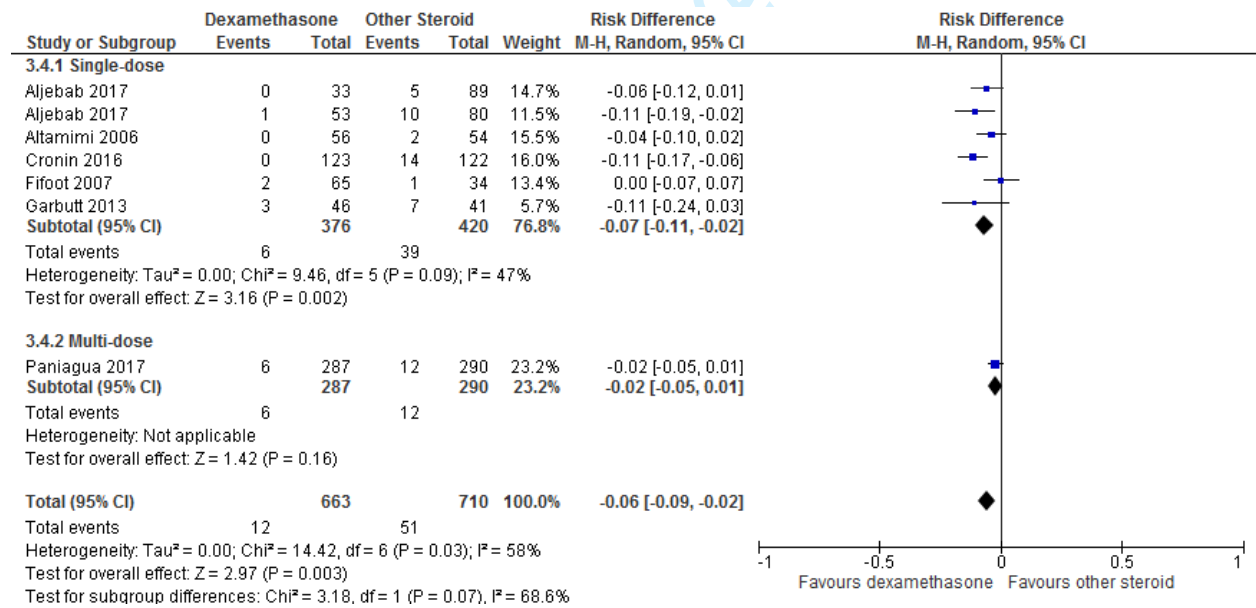

## Vomiting (by dose) – Peto

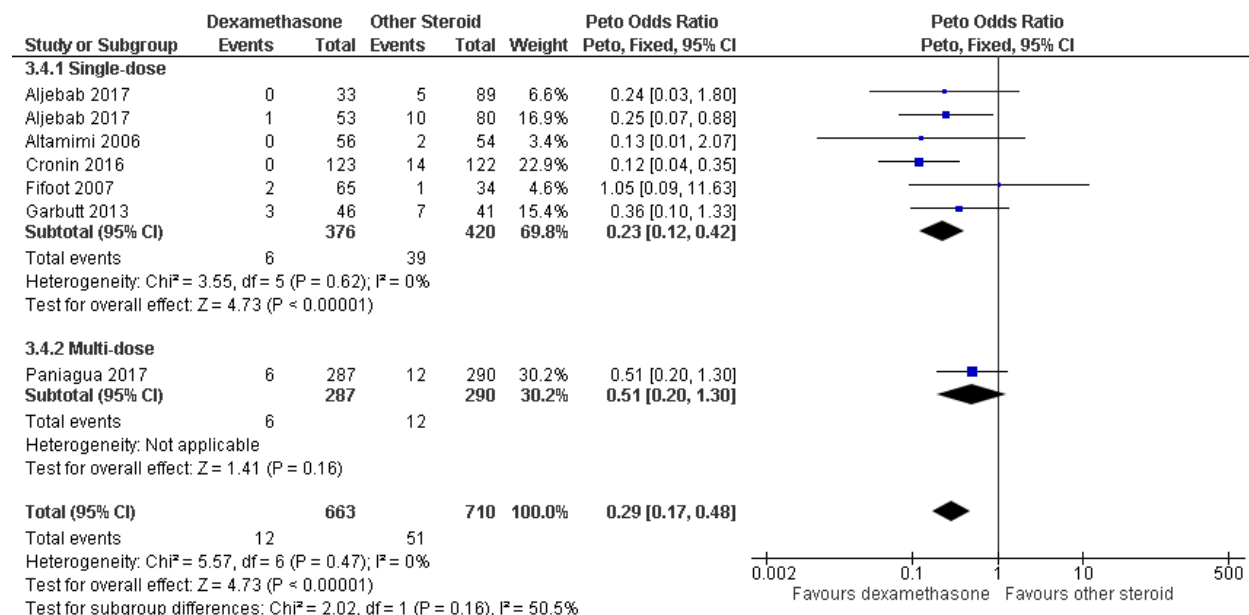

## Vomiting (by condition)

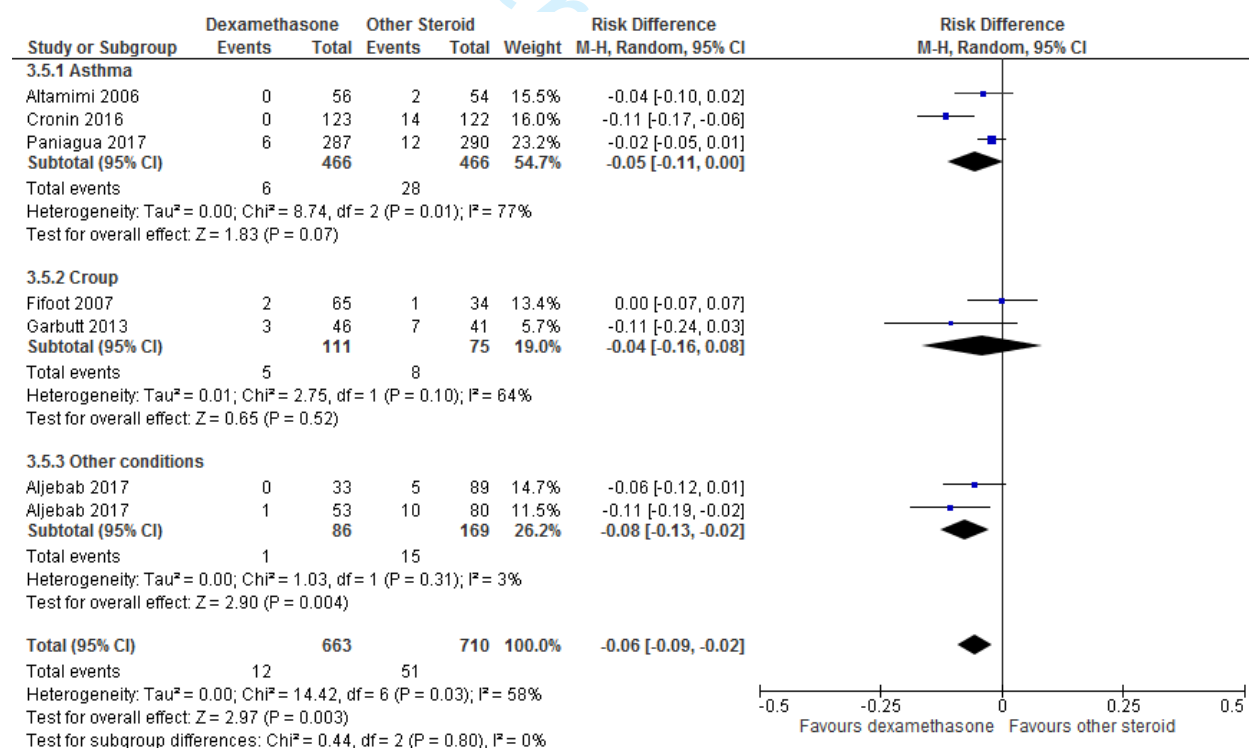



Vomiting (by condition) – Peto

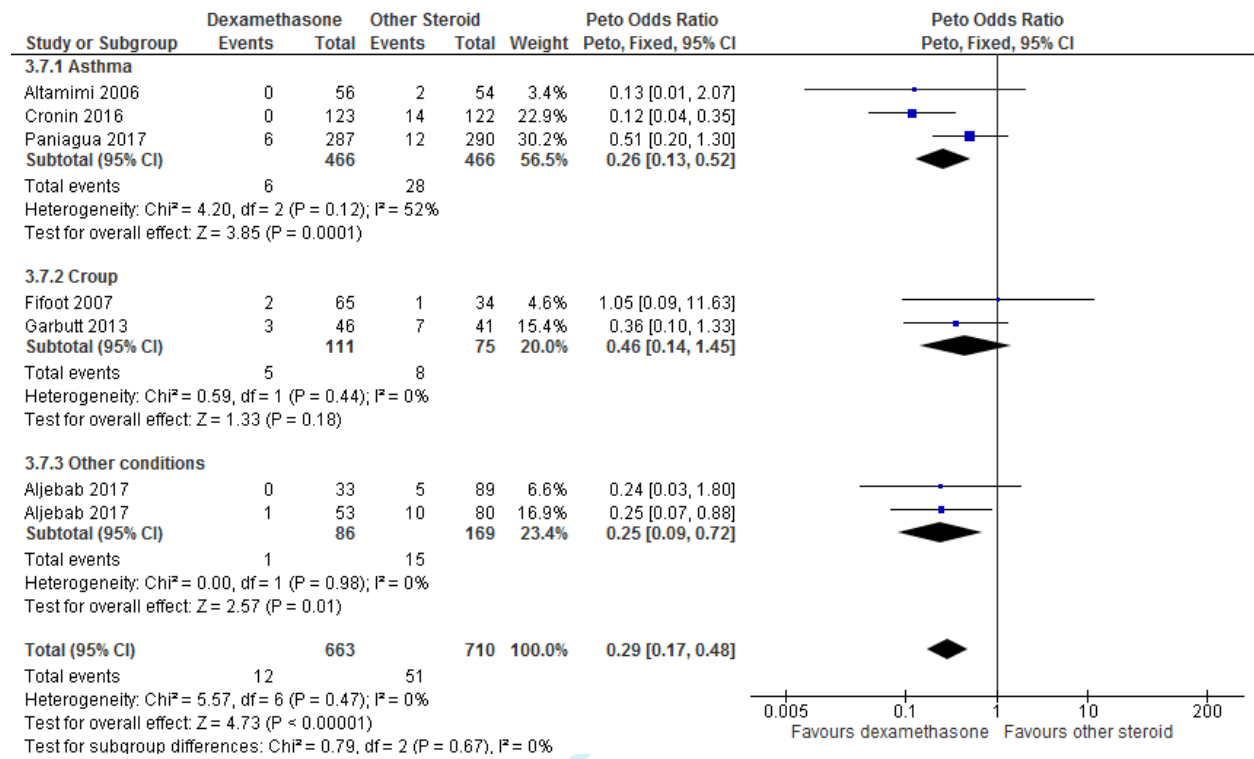

Abdominal pain

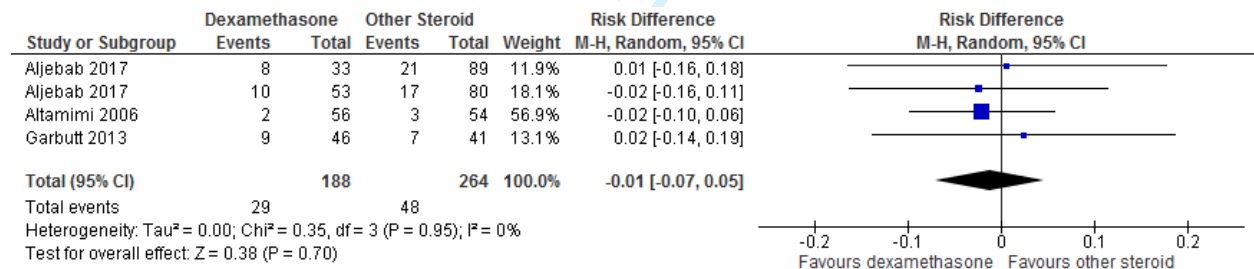

Abdominal pain – Peto

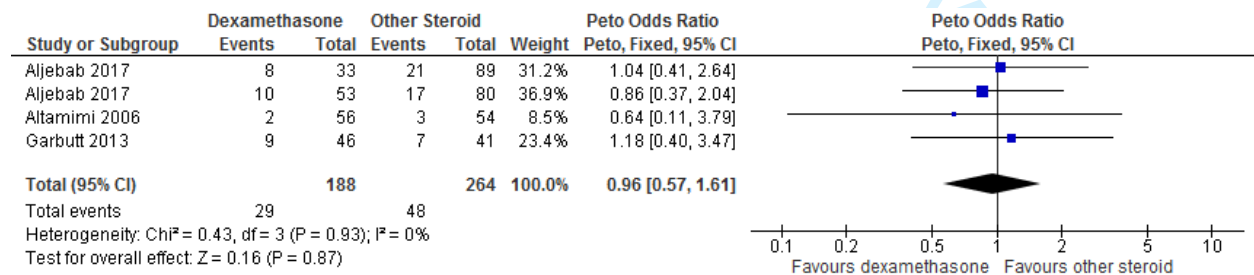

## Abdominal pain (by condition)

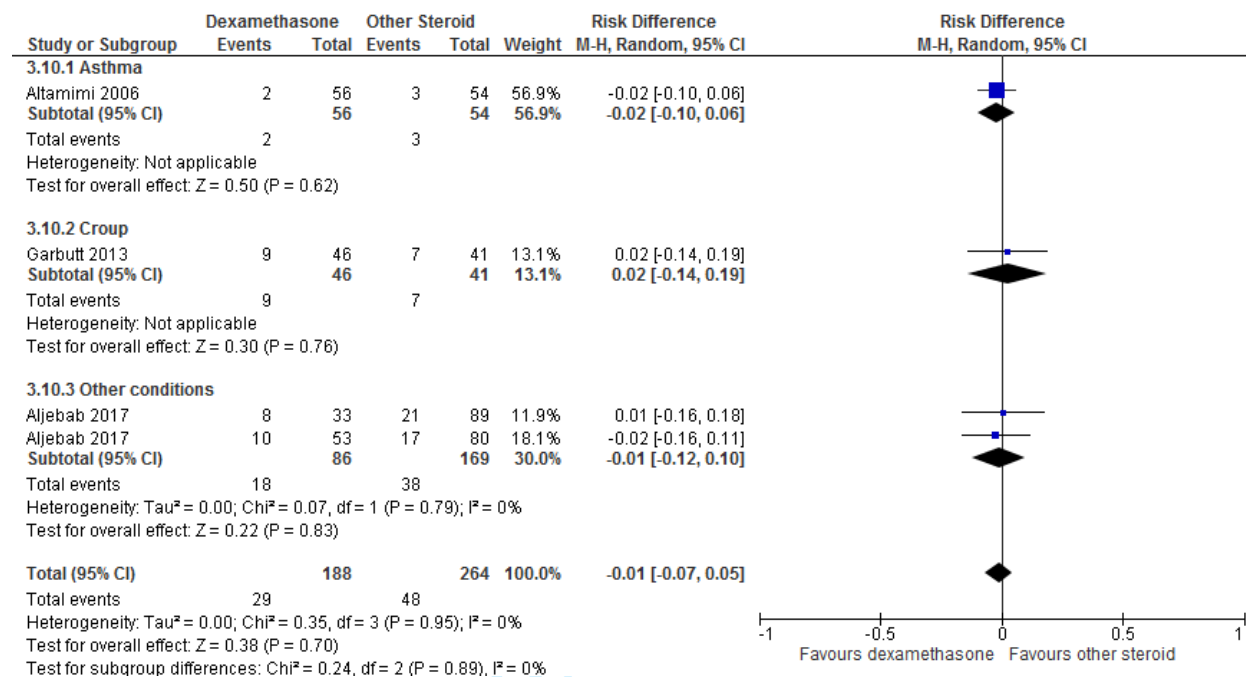

## Abdominal pain (by condition) – Peto

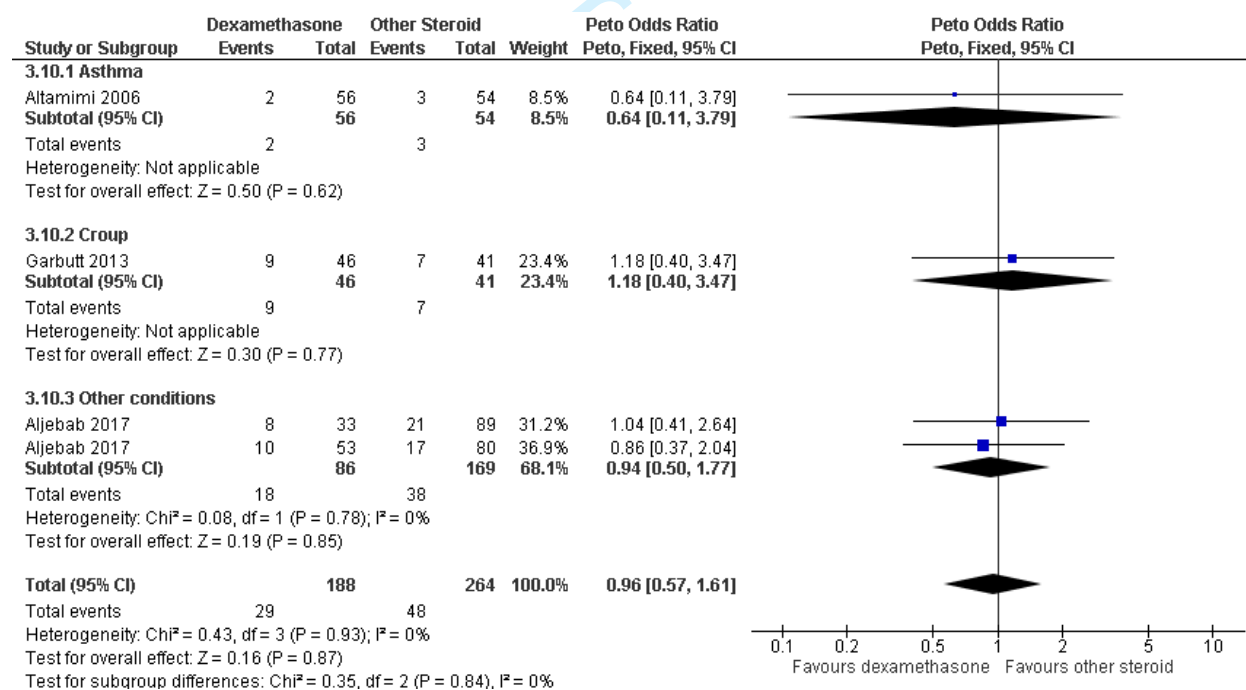

**DEXAMETHASONE vs. OTHER STEROID – CNS & Behaviour**

**Tremor/jitteriness**

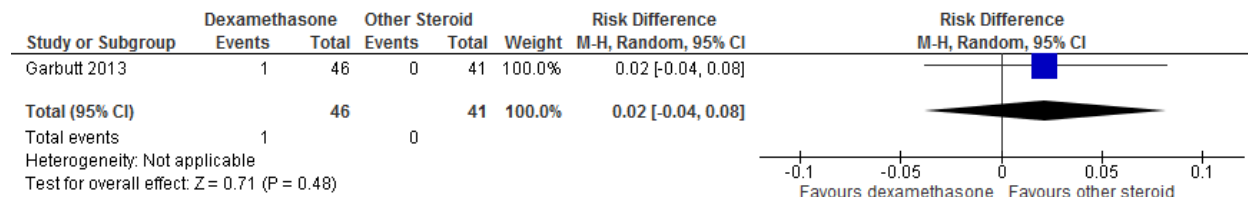

**Tremor/jitteriness – Peto**

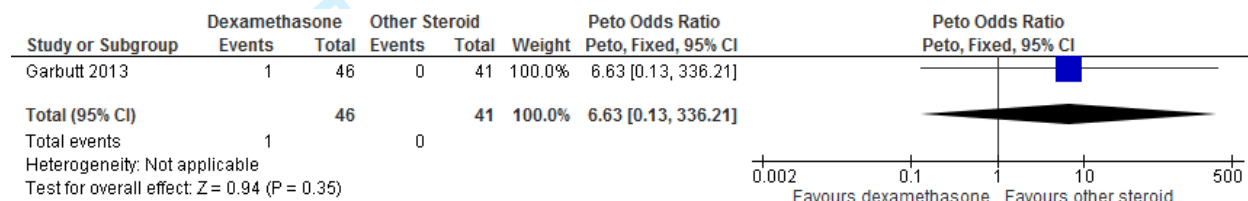

**Behaviour change**

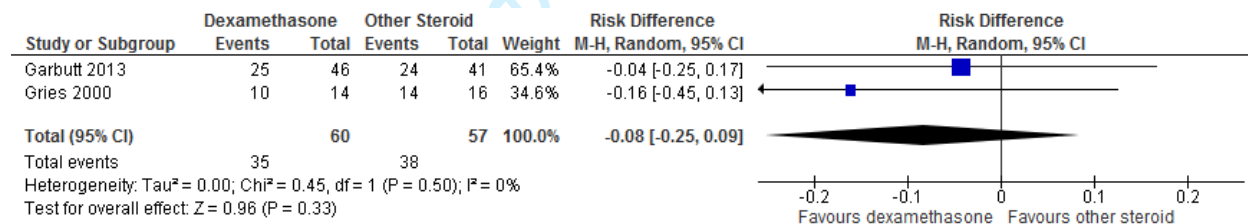

**Behaviour change – Peto**

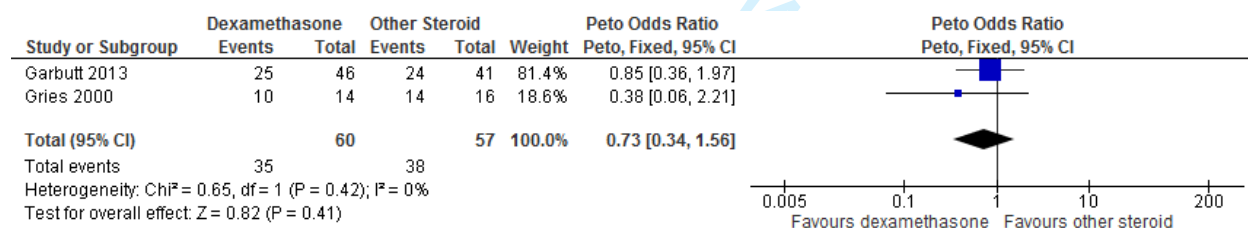

## Behaviour change (by condition)

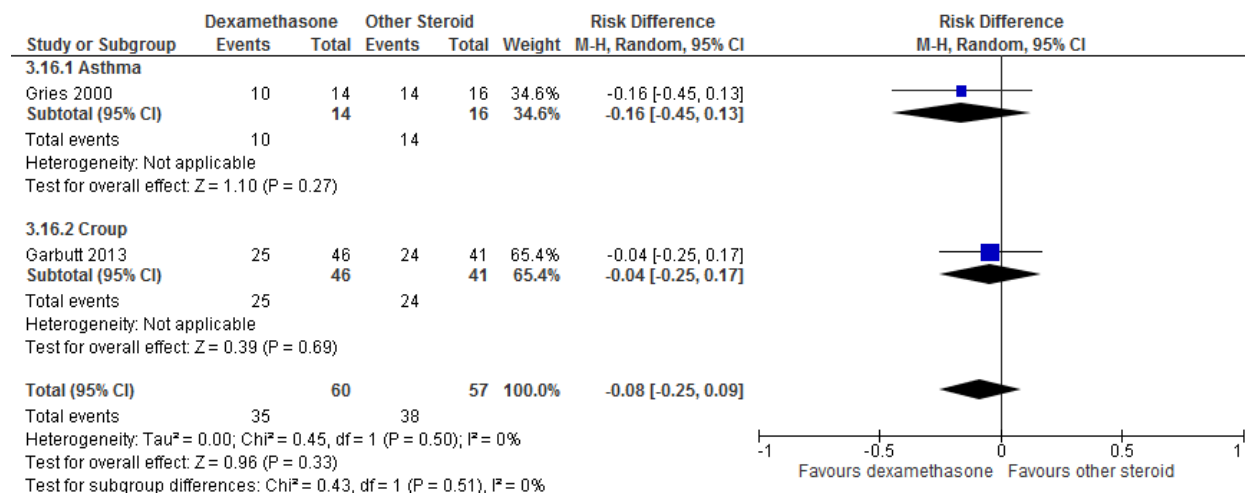

## Behaviour change (by condition) – Peto

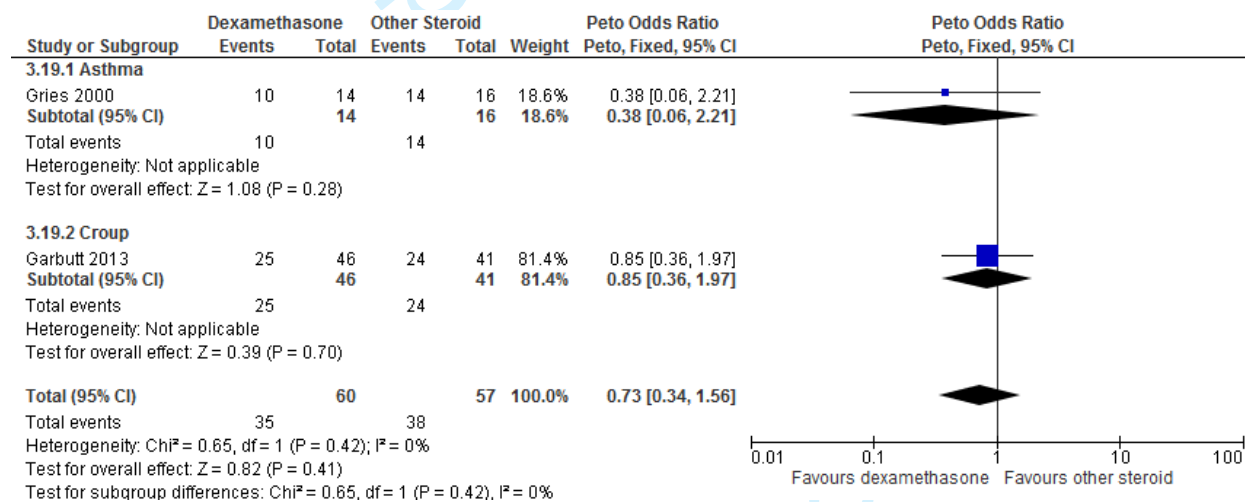

## Headache

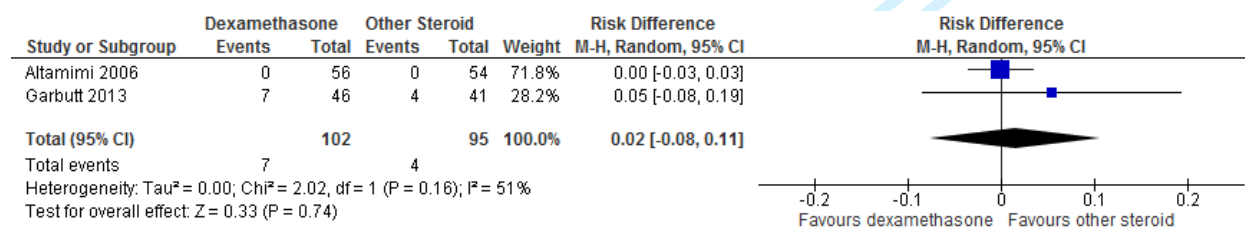

Headache – Peto

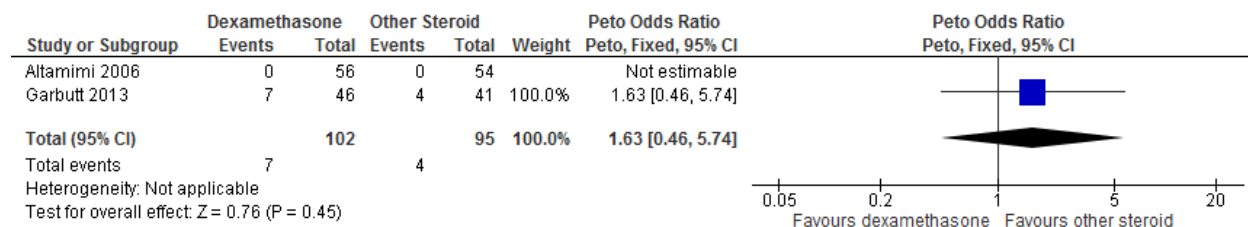

Headache (by condition)

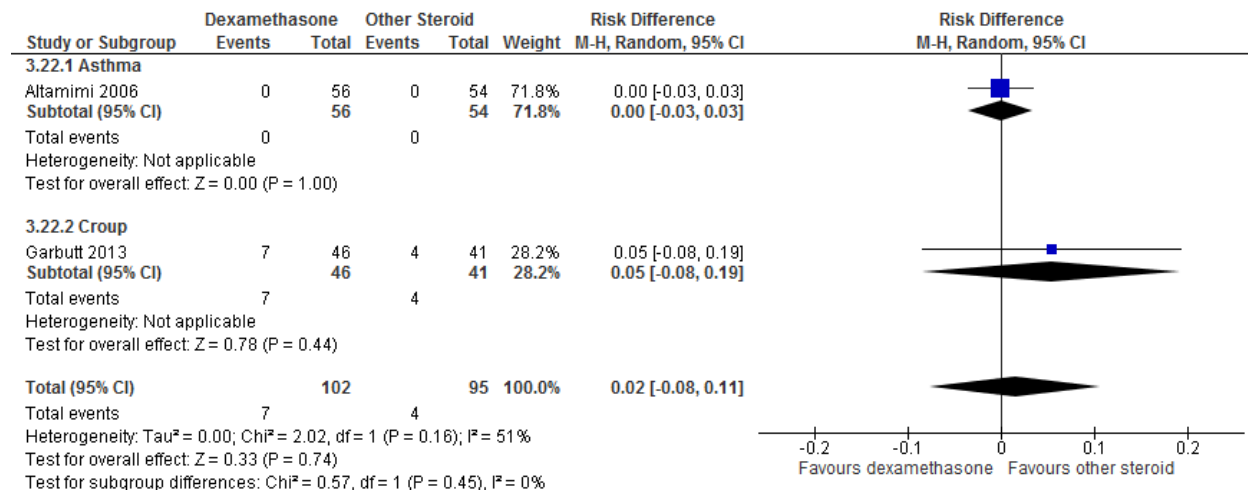

Headache (by condition) – Peto

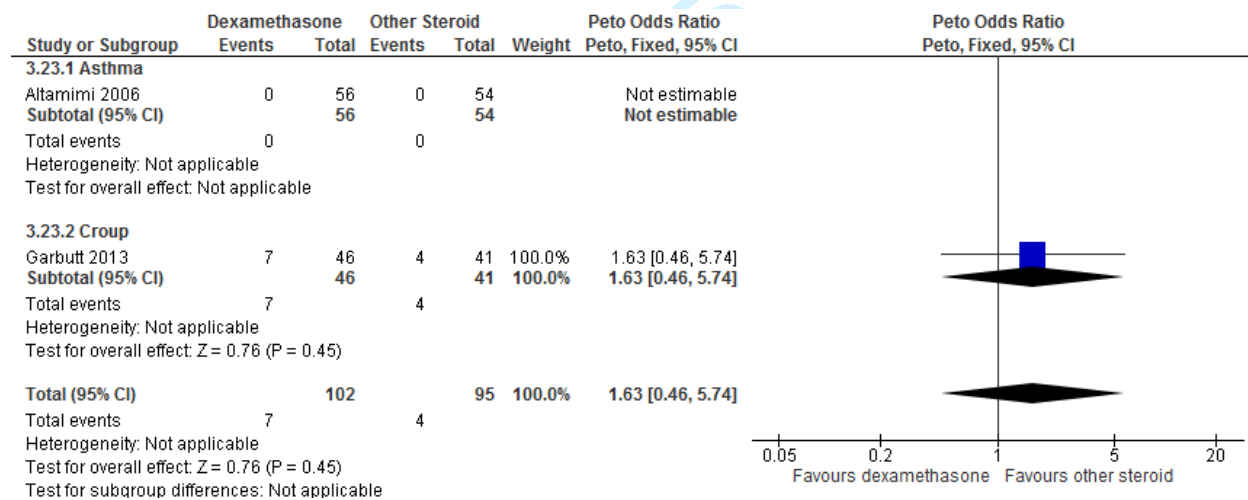

**DEXAMETHASONE vs. OTHER STEROID – Dermatologic****Phlebitis**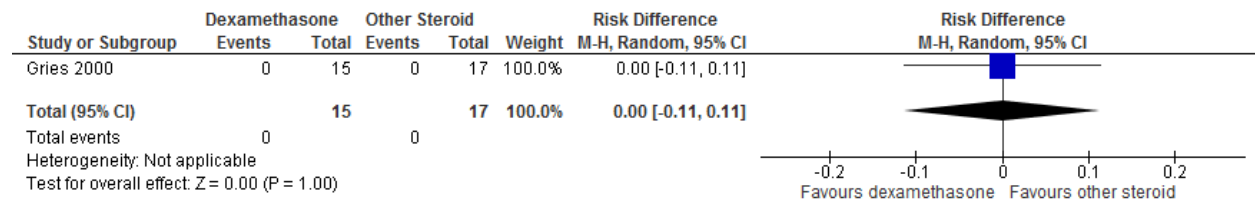**Phlebitis – Peto**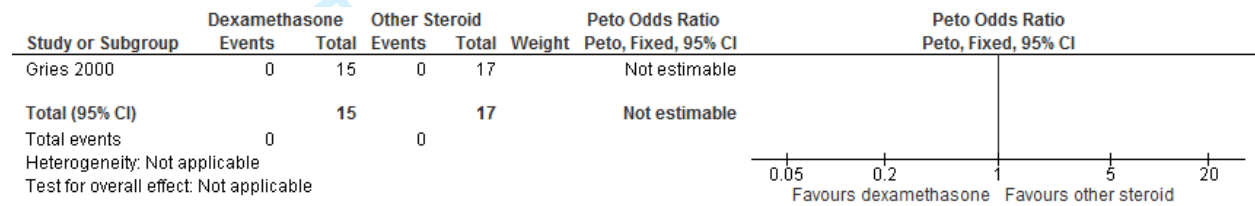

**DEXAMETHASONE vs. OTHER STEROID – Endocrine/Metabolic & Musculoskeletal**

Fluid & electrolyte abnormalities

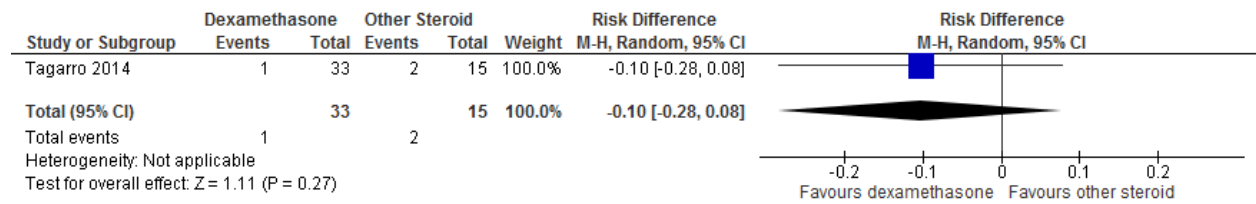

Fluid & electrolyte abnormalities – Peto

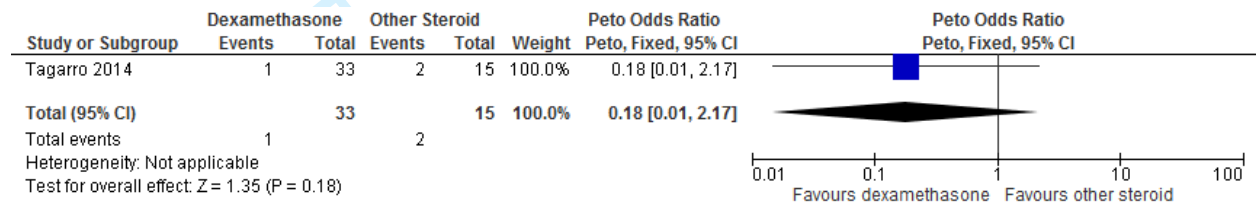

Peer review only

## DEXAMETHASONE vs. OTHER STEROID – Cardiovascular

### Arrhythmia

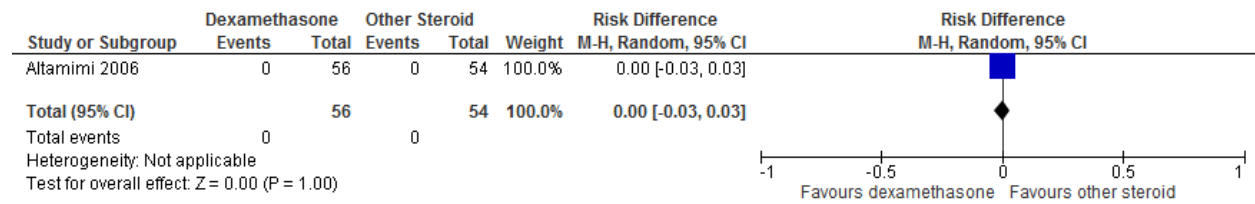

### Arrhythmia – Peto

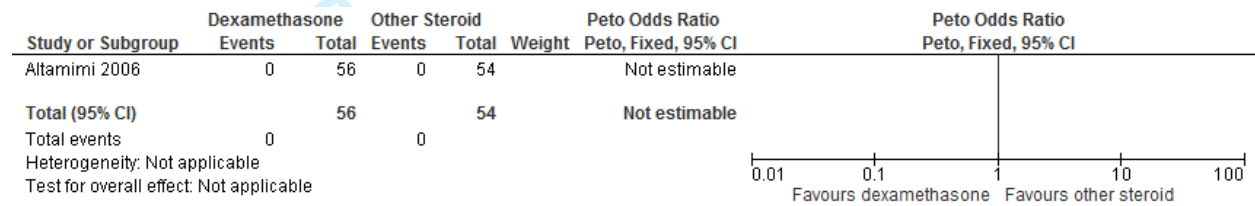

### Hypertension

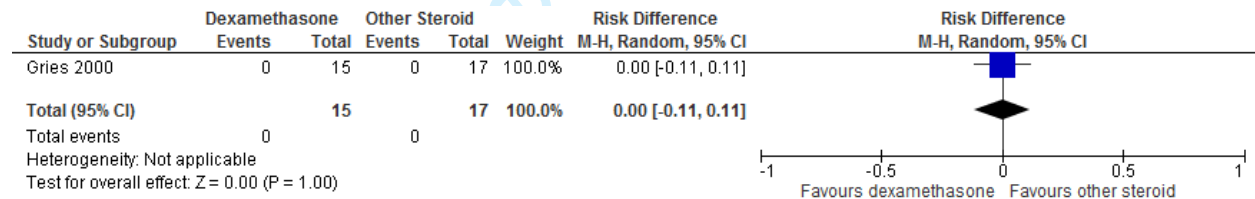

### Hypertension – Peto

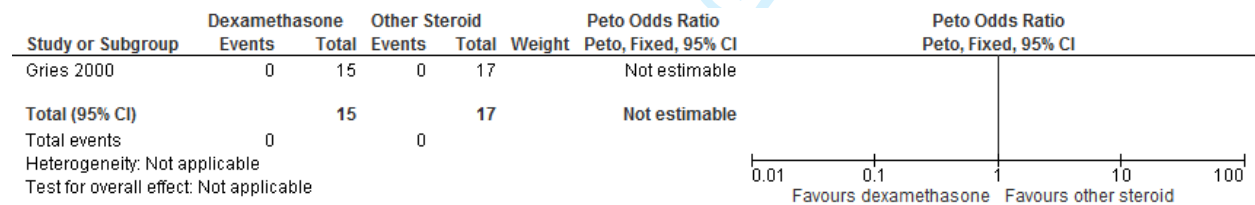



**DEXAMETHASONE vs. OTHER STEROID – General**

**General complaints**

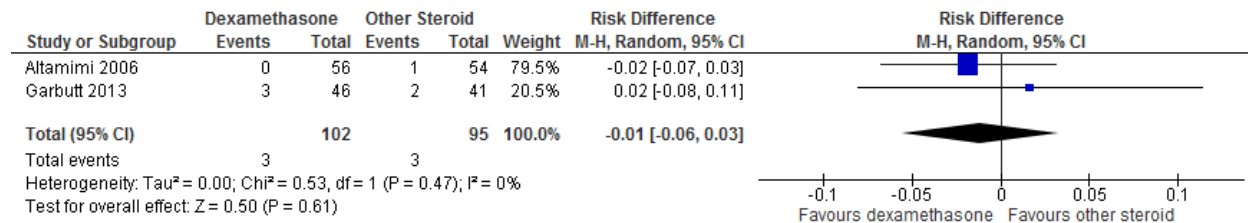

**General complaints – Peto**

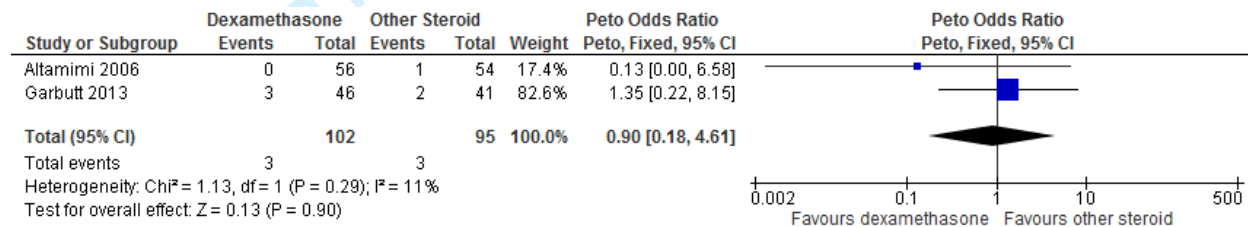

**General complaints (by condition)**

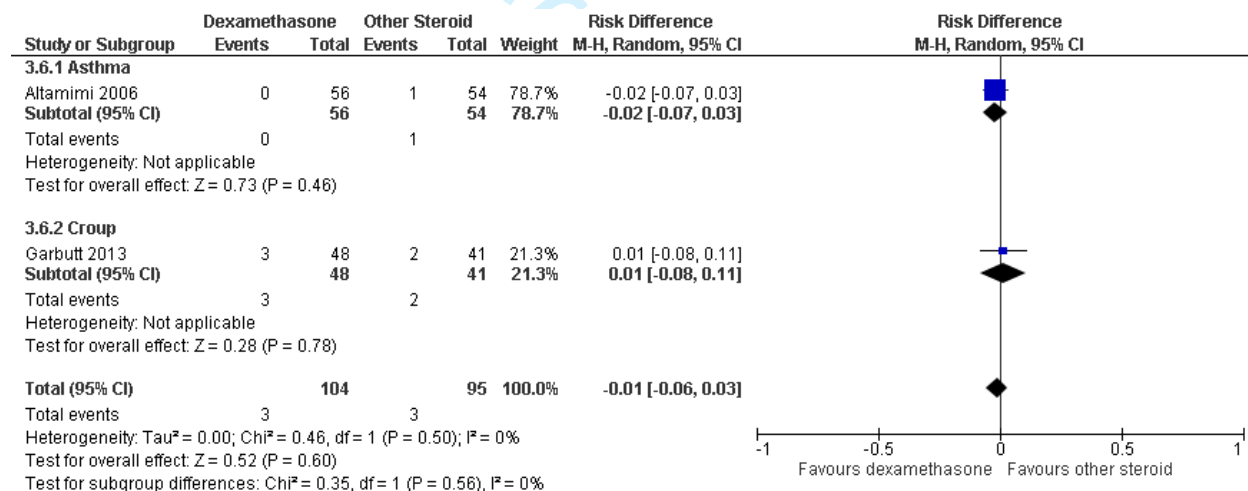

General complaints (by condition) – Peto

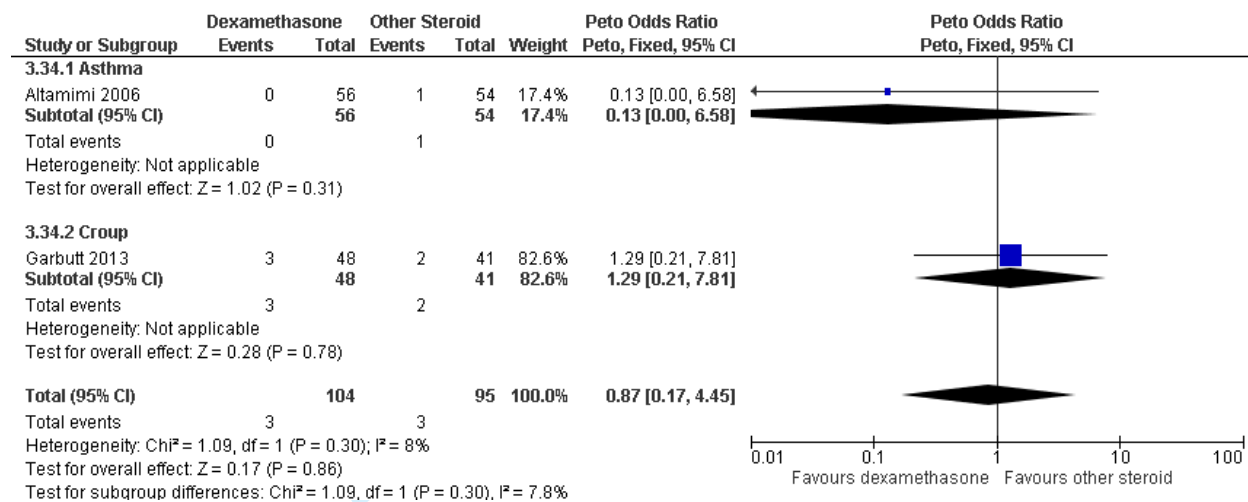

peer review only

## Supplement 7. Studies reporting no adverse events

| Study                       | Condition                      | Comparisons - main                 | Study design | Study sample | AE reporting                                                                                                                                                                                                                                                                                    |
|-----------------------------|--------------------------------|------------------------------------|--------------|--------------|-------------------------------------------------------------------------------------------------------------------------------------------------------------------------------------------------------------------------------------------------------------------------------------------------|
| <b>Alansari 2013</b>        | bronchiolitis                  | systemic vs. placebo               | RCT          | 200          | No AE overall;<br>7 days follow-up revealed no side effect concerns in treatment groups.                                                                                                                                                                                                        |
| <b>Brunette 1988</b>        | asthma, before signs of wheeze | systemic vs. systemic              | nRCT         | 32           | No AE overall;<br>Growth and weight gains for all children were within normal range.                                                                                                                                                                                                            |
| <b>Chen 2008</b>            | asthma                         | systemic vs. inhaled vs. inhaled   | RCT, 3-arm   | 123          | No AE overall;<br>All 3 groups reported no adverse effects.                                                                                                                                                                                                                                     |
| <b>Chub-Uppakarn 2007</b>   | croup                          | systemic vs. systemic              | RCT          | 41           | No AE overall;<br>No significant adverse reaction from dexamethasone treatment in either group.                                                                                                                                                                                                 |
| <b>Escobedo Chavez 1992</b> | asthma                         | systemic vs. non-corticosteroid    | RCT          | 50           | No AE overall;<br>We detected no side effects from the use of methylprednisolone in a single dose.                                                                                                                                                                                              |
| <b>Fifoot 2007</b>          | croup                          | systemic vs. systemic vs. systemic | RCT, 3-arm   | 99           | No AE overall;<br>One patient in each group vomited their first dose of medication; all except one (dexamethasone 0.6mg/kg) tolerated their repeat dose;<br>no patient suffered any adverse outcomes from receiving study steroid, either at index presentation or during the follow-up period. |

|                           |                                   |                                    |            |     |                                                                                                                                |
|---------------------------|-----------------------------------|------------------------------------|------------|-----|--------------------------------------------------------------------------------------------------------------------------------|
| <b>Ghirga 2002</b>        | wheeze - recurrent, early in URTI | inhaled vs. no intervention        | RCT        | 26  | No AE overall;<br>No apparent adverse effects reported 4 years post-study.                                                     |
| <b>Husby 1993</b>         | croup                             | inhaled vs. placebo                | RCT        | 36  | No AE overall;<br>No side effects were reported.                                                                               |
| <b>Jartti 2006</b>        | wheeze - acute                    | systemic vs. placebo               | RCT        | 78  | No AE overall;<br>Prednisolone treatment well tolerated; no clinically significant adverse effects occurred.                   |
| <b>Jartti 2007</b>        | wheeze - recurrent                | systemic vs. placebo               | RCT        | 58  | No AE overall;<br>Prednisolone treatment well tolerated; no clinically significant adverse effects occurred.                   |
| <b>Klassen 1994</b>       | croup                             | inhaled vs. placebo                | RCT        | 54  | One patient in placebo group had a burning sensation on the face. No adverse events noted in budesonide group.                 |
| <b>Langton Hewer 1998</b> | asthma                            | systemic vs. systemic vs. systemic | RCT, 3-arm | 98  | No AE overall;<br>No side effect possibly attributable to prednisolone therapy was noted in any of the three treatment groups. |
| <b>Leipzig 1979</b>       | croup                             | systemic vs. placebo               | RCT        | 30  | No AE overall;<br>Observed no adverse effects or late relapses.                                                                |
| <b>Razi 2015</b>          | asthma                            | inhaled vs. placebo                | RCT        | 100 | No AE overall;<br>No drug-related adverse effects were identified during hospitalization.                                      |
| <b>Roorda 1998</b>        | croup                             | inhaled vs. placebo                | RCT        | 17  | No AE overall;<br>No side effects of treatment regimens were reported.                                                         |

|                     |                                   |                                                                     |          |     |                                                                                                                                                                                                                   |
|---------------------|-----------------------------------|---------------------------------------------------------------------|----------|-----|-------------------------------------------------------------------------------------------------------------------------------------------------------------------------------------------------------------------|
| <b>Saito 2017</b>   | asthma                            | systemic vs. inhaled                                                | RCT      | 50  | No AE overall;<br>Adverse events did not occur in either group;<br>Serum cortisol levels on the 4th day of hospitalization were 17.0mcg/dL and 10.9mcg/dL with significant suppression in the prednisolone group. |
| <b>Schuh 2009</b>   | asthma                            | systemic vs. non-corticosteroid                                     | RCT      | 130 | No AE overall;<br>No adverse effects developed in children given prednisolone after discharge.                                                                                                                    |
| <b>Sparrow 2006</b> | croup                             | systemic vs. systemic                                               | RCT      | 133 | No AE overall;<br>No adverse events in either group.                                                                                                                                                              |
| <b>Storr 1987</b>   | asthma                            | systemic vs. placebo                                                | RCT      | 140 | No AE overall;<br>There were no observed side effects related to the single prednisolone dose.                                                                                                                    |
| <b>Sung 1998</b>    | asthma                            | inhaled vs. placebo                                                 | RCT      | 44  | No AE overall;<br>No adverse effects in either group.                                                                                                                                                             |
| <b>Super 1989</b>   | croup                             | systemic vs. placebo                                                | RCT      | 33  | No AE overall;<br>Did not encounter any side effects directly attributable to dexamethasone.                                                                                                                      |
| <b>Tal 1983</b>     | wheeze - acute                    | systemic + sal;<br>systemic + placebo;<br>sal + placebo;<br>placebo | RCT, 2x2 | 32  | No AE overall;<br>No other side effects or complications were documented, aside from tremor (1 infant) as side effect of salbutamol.                                                                              |
| <b>Tamura 2008</b>  | refractory pneumonia (5 year old) | systemic                                                            | CS (#1)  | 1   | No AE overall;<br>No adverse events in any patients during steroid treatment.                                                                                                                                     |

|                         |               |                            |     |    |                                                                                                                                                                                                                                                         |
|-------------------------|---------------|----------------------------|-----|----|---------------------------------------------------------------------------------------------------------------------------------------------------------------------------------------------------------------------------------------------------------|
| <b>van Woensel 1997</b> | bronchiolitis | systemic vs. placebo       | RCT | 54 | No AE overall;<br>No clinically significant side effects of prednisolone were found.                                                                                                                                                                    |
| <b>Webb 1986</b>        | wheeze        | systemic vs. placebo       | RCT | 38 | No AE overall;<br>No side effects reported by parents and none detected on clinical exam 3 days after completing 5-day treatment course.                                                                                                                |
| <b>Zhang 2003</b>       | bronchiolitis | systemic vs. standard care | RCT | 52 | No AE overall;<br>Potential side-effects of prednisolone not included as outcome measures in this study as short-term steroid therapy has been well confirmed. At time of analysis, no adverse events were noted in patients who received prednisolone. |

AE: adverse events; CS: case series; nRCT: non-randomised controlled trial; RCT: randomised controlled trial; sal: salbutamol; URTI: upper respiratory tract infection; vs: versus

1  
2  
3  
4  
5  
6  
7  
8  
9  
10  
11  
12  
13  
14  
15  
16  
17  
18  
19  
20  
21  
22  
23  
24  
25  
26  
27  
28  
29  
30  
31  
32  
33  
34  
35  
36  
37  
38  
39  
40  
41  
42  
43  
44  
45  
46  
47

## The PRISMA for Abstracts Checklist

| TITLE                                     | CHECKLIST ITEM                                                                                                                                                                                       | REPORTED ON PAGE # |
|-------------------------------------------|------------------------------------------------------------------------------------------------------------------------------------------------------------------------------------------------------|--------------------|
| 1. Title:                                 | Identify the report as a systematic review, meta-analysis, or both.                                                                                                                                  | 1                  |
| <b>BACKGROUND</b>                         |                                                                                                                                                                                                      |                    |
| 2. Objectives:                            | The research question including components such as participants, interventions, comparators, and outcomes.                                                                                           | 3                  |
| <b>METHODS</b>                            |                                                                                                                                                                                                      |                    |
| 3. Eligibility criteria:                  | Study and report characteristics used as criteria for inclusion.                                                                                                                                     | 3                  |
| 4. Information sources:                   | Key databases searched and search dates.                                                                                                                                                             | 3                  |
| 5. Risk of bias:                          | Methods of assessing risk of bias.                                                                                                                                                                   | 3                  |
| <b>RESULTS</b>                            |                                                                                                                                                                                                      |                    |
| 6. Included studies:                      | Number and type of included studies and participants and relevant characteristics of studies.                                                                                                        | 3                  |
| 7. Synthesis of results:                  | Results for main outcomes (benefits and harms), preferably indicating the number of studies and participants for each. If meta-analysis was done, include summary measures and confidence intervals. | 3                  |
| 8. Description of the effect:             | Direction of the effect (i.e. which group is favoured) and size of the effect in terms meaningful to clinicians and patients.                                                                        | 3                  |
| <b>DISCUSSION</b>                         |                                                                                                                                                                                                      |                    |
| 9. Strengths and Limitations of evidence: | Brief summary of strengths and limitations of evidence (e.g. inconsistency, imprecision, indirectness, or risk of bias, other supporting or conflicting evidence)                                    | 3                  |
| 10. Interpretation:                       | General interpretation of the results and important implications                                                                                                                                     | 3                  |
| <b>OTHER</b>                              |                                                                                                                                                                                                      |                    |
| 11. Funding:                              | Primary source of funding for the review.                                                                                                                                                            |                    |
| 12. Registration:                         | Registration number and registry name.                                                                                                                                                               |                    |

| Section/<br>topic<br>(page no) | Item | PRISMA checklist item                                                                                                                                                                                                                                                                                       | PRISMA harms<br>(minimum)                                                                   | Recommendations<br>for reporting<br>harms in<br>systematic reviews<br>(desirable)                                                                                                                                                      | Check if done                                                    |
|--------------------------------|------|-------------------------------------------------------------------------------------------------------------------------------------------------------------------------------------------------------------------------------------------------------------------------------------------------------------|---------------------------------------------------------------------------------------------|----------------------------------------------------------------------------------------------------------------------------------------------------------------------------------------------------------------------------------------|------------------------------------------------------------------|
| <b>Title</b>                   |      |                                                                                                                                                                                                                                                                                                             |                                                                                             |                                                                                                                                                                                                                                        |                                                                  |
| Title (3)                      | 1    | Identify the report as a systematic review, meta-analysis, or both.                                                                                                                                                                                                                                         | Specifically mention “harms” or other related terms, or the harm of interest in the review. | —                                                                                                                                                                                                                                      | Title page, p. 1-2                                               |
| <b>Abstract</b>                |      |                                                                                                                                                                                                                                                                                                             |                                                                                             |                                                                                                                                                                                                                                        |                                                                  |
| Structured summary (4)         | 2    | Provide a structured summary including, as applicable: background; objectives; data sources; study eligibility criteria, participants, and interventions; study appraisal and synthesis methods; results; limitations; conclusions and implications of key findings; systematic review registration number. | —                                                                                           | Abstracts should report any analysis of harms undertaken in the review, if harms are a primary or secondary outcome.                                                                                                                   | p. 3                                                             |
| <b>Introduction</b>            |      |                                                                                                                                                                                                                                                                                                             |                                                                                             |                                                                                                                                                                                                                                        |                                                                  |
| Rationale (5)                  | 3    | Describe the rationale for the review in the context of what is already known.                                                                                                                                                                                                                              | —                                                                                           | It should clearly describe in introduction or in methods section which events are considered harms and provide a clear rationale for the specific harm(s), condition(s), and patient group(s) included in the review.                  | p. 5                                                             |
| Objectives (5)                 | 4    | Provide an explicit statement of questions being addressed with reference to participants, interventions, comparisons, outcomes, and study design (PICOS).                                                                                                                                                  | —                                                                                           | PICOS format should be specified, although in systematic reviews of harms the selection criteria for P, C, and O may be very broad (same intervention may have been used for heterogeneous indications in a diverse range of patients) | p. 6                                                             |
| <b>Methods</b>                 |      |                                                                                                                                                                                                                                                                                                             |                                                                                             |                                                                                                                                                                                                                                        |                                                                  |
| Protocol and registration (6)  | 5    | Indicate if a review protocol exists, if and where it can be accessed (eg, web address), and, if available, provide registration information including registration number.                                                                                                                                 | —                                                                                           | No specific additional information is required for systematic reviews of harms.                                                                                                                                                        | p. 6;<br>protocol reference # reported in funding source (p. 22) |
| Eligibility criteria (6)       | 6    | Specify study characteristics (eg, PICOS, length of follow-up) and report characteristics (eg, years considered, language, publication                                                                                                                                                                      | —                                                                                           | Report how handled relevant studies (based on population and intervention) when the                                                                                                                                                    | p. 6-7;                                                          |



|                             |    |                                                                                                                                                                          |   |                                                                                                                                                                                                                                                                                                                                                          |                                                                  |
|-----------------------------|----|--------------------------------------------------------------------------------------------------------------------------------------------------------------------------|---|----------------------------------------------------------------------------------------------------------------------------------------------------------------------------------------------------------------------------------------------------------------------------------------------------------------------------------------------------------|------------------------------------------------------------------|
|                             |    | status) used as criteria for eligibility, giving rationale.                                                                                                              |   | outcomes of interest were not reported. Report choices for specific study designs and length of follow-up.                                                                                                                                                                                                                                               | Supplement 2 - Eligibility criteria for study inclusion          |
| Information sources (7)     | 7  | Describe all information sources (eg, databases with dates of coverage, contact with study authors to identify additional studies) in the search and date last searched. | — | Report if only searched for published data, or also sought data from unpublished sources, from authors, drug manufacturers and regulatory agencies. If includes unpublished data, provide the source and the process of obtaining it.                                                                                                                    | p. 6;<br>Supplement 1 - Search strategy                          |
| Search (7)                  | 8  | Present full electronic search strategy for at least one database, including any limits used, such that it could be repeated.                                            | — | If additional searches were used specifically to identify adverse events, authors should present the full search process so it can be replicated.                                                                                                                                                                                                        | Supplement 1 - Search strategy                                   |
| Study selection (8)         | 9  | State the process for selecting studies (ie, screening, eligibility, included in systematic review, and, if applicable, included in the meta-analysis).                  | — | If only included studies reporting on adverse events of interest, defined if screening was based on adverse event reporting in title/abstract or full text. If no harms reported in the text, report if any attempt was made to retrieve relevant data from authors.                                                                                     | p. 7;<br>Supplement 2 - Eligibility criteria for study inclusion |
| Data collection process (9) | 10 | Describe method of data extraction from reports (eg, piloted forms, independently, in duplicate) and any processes for obtaining and confirming data from investigators. | — | No specific additional information is required for systematic reviews of harms.                                                                                                                                                                                                                                                                          | p. 7-8                                                           |
| Data items (9)              | 11 | List and define all variables for which data were sought (eg, PICOS, funding sources) and any assumptions and simplifications made.                                      | — | Report the definition of the harm and seriousness used by each included study (if applicable). Report if multiple events occurred in the same individuals, if this information is available. Consider if the harm may be related to factors associated with participants (eg, age, sex, use of medications) or provider (eg, years of practice, level of | p. 7-8                                                           |

|    |                 |    |                                         |                      |  |                          |
|----|-----------------|----|-----------------------------------------|----------------------|--|--------------------------|
| 1  |                 |    |                                         |                      |  |                          |
| 2  |                 |    |                                         |                      |  |                          |
| 3  |                 |    |                                         |                      |  |                          |
| 4  |                 |    |                                         |                      |  | training). Specify if    |
| 5  |                 |    |                                         |                      |  | information was          |
| 6  |                 |    |                                         |                      |  | extracted and how it     |
| 7  |                 |    |                                         |                      |  | was used in subsequent   |
| 8  |                 |    |                                         |                      |  | results. Specify if      |
| 9  |                 |    |                                         |                      |  | extracted details        |
| 10 |                 |    |                                         |                      |  | regarding the specific   |
| 11 |                 |    |                                         |                      |  | methods used to capture  |
| 12 |                 |    |                                         |                      |  | harms (active/passive    |
| 13 |                 |    |                                         |                      |  | and timing of adverse    |
| 14 | Risk of bias in | 12 | Describe methods used for assessing     | —                    |  | The risk of bias         |
| 15 | individual      |    | risk of bias of individual studies      |                      |  | assessment should be     |
| 16 | studies (10)    |    | (including specification of whether     |                      |  | considered separately    |
| 17 |                 |    | this was done at the study or outcome   |                      |  | for outcomes of benefit  |
| 18 |                 |    | level), and how this information is to  |                      |  | and harms.               |
| 19 | Summary         | 13 | State the principal summary measures    | —                    |  | No specific additional   |
| 20 | measures (11)   |    | (eg, risk ratio, difference in means).  |                      |  | information is required  |
| 21 |                 |    |                                         |                      |  | for systematic reviews   |
| 22 |                 |    |                                         |                      |  | of harms.                |
| 23 | Synthesis of    | 14 | Describe the methods of handling data   | Specify how zero     |  |                          |
| 24 | results (11)    |    | and combining results of studies, if    | events were handled, |  | p. 8-9                   |
| 25 |                 |    | done, including measures of             | if relevant.         |  |                          |
| 26 |                 |    | consistency (eg, $I^2$ ) for each meta- |                      |  |                          |
| 27 |                 |    | analysis.                               |                      |  |                          |
| 28 | Risk of bias    | 15 | Specify any assessment of risk of bias  | —                    |  |                          |
| 29 | across studies  |    | that may affect the cumulative          |                      |  | Present the extent of    |
| 30 | (11)            |    | evidence (eg, publication bias,         |                      |  | missing information      |
| 31 |                 |    | selective reporting within studies).    |                      |  | (studies without harms   |
| 32 |                 |    |                                         |                      |  | outcomes), any factors   |
| 33 |                 |    |                                         |                      |  | that may account for     |
| 34 |                 |    |                                         |                      |  | their absence, and       |
| 35 |                 |    |                                         |                      |  | whether these reasons    |
| 36 |                 |    |                                         |                      |  | may be related to the    |
| 37 | Additional      | 16 | Describe methods of additional          | —                    |  |                          |
| 38 | analyses (12)   |    | analyses (eg, sensitivity or subgroup   |                      |  | Sensitivity analyses     |
| 39 |                 |    | analyses, meta-regression), if done,    |                      |  | may be affected by       |
| 40 |                 |    | indicating which were prespecified.     |                      |  | different definitions,   |
| 41 |                 |    |                                         |                      |  | grading, and attribution |
| 42 |                 |    |                                         |                      |  | of adverse events, as    |
| 43 |                 |    |                                         |                      |  | adverse events are       |
| 44 |                 |    |                                         |                      |  | typically infrequent or  |
| 45 |                 |    |                                         |                      |  | reported using           |
| 46 |                 |    |                                         |                      |  | heterogeneous            |
| 47 |                 |    |                                         |                      |  | classifications. Report  |
| 48 |                 |    |                                         |                      |  | the number of            |
| 49 |                 |    |                                         |                      |  | participants and studies |
| 50 | <b>Results</b>  |    |                                         |                      |  | included in each         |
| 51 | Study           | 17 | Give numbers of studies screened,       | —                    |  | subgroup.                |
| 52 | selection (13)  |    | assessed for eligibility, and included  |                      |  |                          |
| 53 |                 |    | in the review, with reasons for         |                      |  | If a review addresses    |
| 54 |                 |    | exclusions at each stage, ideally with  |                      |  | both efficacy and        |
| 55 |                 |    | a flow diagram.                         |                      |  | harms, display a flow    |
| 56 |                 |    |                                         |                      |  | diagram specific for     |
| 57 |                 |    |                                         |                      |  | each (efficacy and       |
| 58 |                 |    |                                         |                      |  | harm).                   |
| 59 |                 |    |                                         |                      |  |                          |
| 60 |                 |    |                                         |                      |  |                          |

|    |                                    |    |                                                                                                                                                                                                          |                                                                                                                    |                                                                                                                                                                                                                                                                                                                                          |                                                                                                                                                                                                                                                                  |
|----|------------------------------------|----|----------------------------------------------------------------------------------------------------------------------------------------------------------------------------------------------------------|--------------------------------------------------------------------------------------------------------------------|------------------------------------------------------------------------------------------------------------------------------------------------------------------------------------------------------------------------------------------------------------------------------------------------------------------------------------------|------------------------------------------------------------------------------------------------------------------------------------------------------------------------------------------------------------------------------------------------------------------|
| 1  |                                    |    |                                                                                                                                                                                                          |                                                                                                                    |                                                                                                                                                                                                                                                                                                                                          |                                                                                                                                                                                                                                                                  |
| 2  |                                    |    |                                                                                                                                                                                                          |                                                                                                                    |                                                                                                                                                                                                                                                                                                                                          |                                                                                                                                                                                                                                                                  |
| 3  | Study characteristics (14)         | 18 | For each study, present characteristics for which data were extracted (eg, study size, PICOS, follow-up period) and provide the citations.                                                               | Define each harm addressed, how it was ascertained (eg, patient report, active search), and over what time period. | Add additional characteristics to: "P" (population) patient risk factors that were considered as possibly affecting the risk of the harm outcome. "I" (intervention) professional expertise/skills if relevant (for example if the intervention is a procedure). "T" (time) timing of all harms assessments and the length of follow-up. | p. 9;<br>Supplement 3 - Characteristics of included studies                                                                                                                                                                                                      |
| 4  |                                    |    |                                                                                                                                                                                                          |                                                                                                                    |                                                                                                                                                                                                                                                                                                                                          |                                                                                                                                                                                                                                                                  |
| 5  |                                    |    |                                                                                                                                                                                                          |                                                                                                                    |                                                                                                                                                                                                                                                                                                                                          |                                                                                                                                                                                                                                                                  |
| 6  |                                    |    |                                                                                                                                                                                                          |                                                                                                                    |                                                                                                                                                                                                                                                                                                                                          |                                                                                                                                                                                                                                                                  |
| 7  |                                    |    |                                                                                                                                                                                                          |                                                                                                                    |                                                                                                                                                                                                                                                                                                                                          |                                                                                                                                                                                                                                                                  |
| 8  |                                    |    |                                                                                                                                                                                                          |                                                                                                                    |                                                                                                                                                                                                                                                                                                                                          |                                                                                                                                                                                                                                                                  |
| 9  |                                    |    |                                                                                                                                                                                                          |                                                                                                                    |                                                                                                                                                                                                                                                                                                                                          |                                                                                                                                                                                                                                                                  |
| 10 |                                    |    |                                                                                                                                                                                                          |                                                                                                                    |                                                                                                                                                                                                                                                                                                                                          |                                                                                                                                                                                                                                                                  |
| 11 |                                    |    |                                                                                                                                                                                                          |                                                                                                                    |                                                                                                                                                                                                                                                                                                                                          |                                                                                                                                                                                                                                                                  |
| 12 |                                    |    |                                                                                                                                                                                                          |                                                                                                                    |                                                                                                                                                                                                                                                                                                                                          |                                                                                                                                                                                                                                                                  |
| 13 |                                    |    |                                                                                                                                                                                                          |                                                                                                                    |                                                                                                                                                                                                                                                                                                                                          |                                                                                                                                                                                                                                                                  |
| 14 |                                    |    |                                                                                                                                                                                                          |                                                                                                                    |                                                                                                                                                                                                                                                                                                                                          |                                                                                                                                                                                                                                                                  |
| 15 |                                    |    |                                                                                                                                                                                                          |                                                                                                                    |                                                                                                                                                                                                                                                                                                                                          |                                                                                                                                                                                                                                                                  |
| 16 |                                    |    |                                                                                                                                                                                                          |                                                                                                                    |                                                                                                                                                                                                                                                                                                                                          |                                                                                                                                                                                                                                                                  |
| 17 |                                    |    |                                                                                                                                                                                                          |                                                                                                                    |                                                                                                                                                                                                                                                                                                                                          |                                                                                                                                                                                                                                                                  |
| 18 | Risk of bias within studies (15)   | 19 | Present data on risk of bias of each study and, if available, any outcome level assessment (see item 12).                                                                                                | —                                                                                                                  | Consider the possible sources of biases that could affect the specific harm under consideration within the review. Sample selection, dropouts and measurement of adverse events should be evaluated separately from the outcomes of benefit as described in item 12, above.                                                              | p. 9;<br>Supplement 4 - Methodological quality of included studies                                                                                                                                                                                               |
| 19 |                                    |    |                                                                                                                                                                                                          |                                                                                                                    |                                                                                                                                                                                                                                                                                                                                          |                                                                                                                                                                                                                                                                  |
| 20 |                                    |    |                                                                                                                                                                                                          |                                                                                                                    |                                                                                                                                                                                                                                                                                                                                          |                                                                                                                                                                                                                                                                  |
| 21 |                                    |    |                                                                                                                                                                                                          |                                                                                                                    |                                                                                                                                                                                                                                                                                                                                          |                                                                                                                                                                                                                                                                  |
| 22 |                                    |    |                                                                                                                                                                                                          |                                                                                                                    |                                                                                                                                                                                                                                                                                                                                          |                                                                                                                                                                                                                                                                  |
| 23 |                                    |    |                                                                                                                                                                                                          |                                                                                                                    |                                                                                                                                                                                                                                                                                                                                          |                                                                                                                                                                                                                                                                  |
| 24 |                                    |    |                                                                                                                                                                                                          |                                                                                                                    |                                                                                                                                                                                                                                                                                                                                          |                                                                                                                                                                                                                                                                  |
| 25 |                                    |    |                                                                                                                                                                                                          |                                                                                                                    |                                                                                                                                                                                                                                                                                                                                          |                                                                                                                                                                                                                                                                  |
| 26 |                                    |    |                                                                                                                                                                                                          |                                                                                                                    |                                                                                                                                                                                                                                                                                                                                          |                                                                                                                                                                                                                                                                  |
| 27 |                                    |    |                                                                                                                                                                                                          |                                                                                                                    |                                                                                                                                                                                                                                                                                                                                          |                                                                                                                                                                                                                                                                  |
| 28 |                                    |    |                                                                                                                                                                                                          |                                                                                                                    |                                                                                                                                                                                                                                                                                                                                          |                                                                                                                                                                                                                                                                  |
| 29 |                                    |    |                                                                                                                                                                                                          |                                                                                                                    |                                                                                                                                                                                                                                                                                                                                          |                                                                                                                                                                                                                                                                  |
| 30 |                                    |    |                                                                                                                                                                                                          |                                                                                                                    |                                                                                                                                                                                                                                                                                                                                          |                                                                                                                                                                                                                                                                  |
| 31 | Results of individual studies (16) | 20 | For all outcomes considered (benefits or harms), present, for each study: (a) simple summary data for each intervention group (b) effect estimates and confidence intervals, ideally with a forest plot. | —                                                                                                                  | Report the actual numbers of adverse events in each study, separately for each intervention.                                                                                                                                                                                                                                             | p. 10;<br>Supplement 3 - Characteristics of included studies                                                                                                                                                                                                     |
| 32 |                                    |    |                                                                                                                                                                                                          |                                                                                                                    |                                                                                                                                                                                                                                                                                                                                          |                                                                                                                                                                                                                                                                  |
| 33 |                                    |    |                                                                                                                                                                                                          |                                                                                                                    |                                                                                                                                                                                                                                                                                                                                          |                                                                                                                                                                                                                                                                  |
| 34 |                                    |    |                                                                                                                                                                                                          |                                                                                                                    |                                                                                                                                                                                                                                                                                                                                          |                                                                                                                                                                                                                                                                  |
| 35 |                                    |    |                                                                                                                                                                                                          |                                                                                                                    |                                                                                                                                                                                                                                                                                                                                          |                                                                                                                                                                                                                                                                  |
| 36 |                                    |    |                                                                                                                                                                                                          |                                                                                                                    |                                                                                                                                                                                                                                                                                                                                          |                                                                                                                                                                                                                                                                  |
| 37 | Synthesis of results (17)          | 21 | Present results of each meta-analysis done, including confidence intervals and measures of consistency.                                                                                                  | Describe any assessment of possible causality.                                                                     | If included data from unpublished sources, report clearly the data source and the impact of these studies to the final systematic review.                                                                                                                                                                                                | p. 10-15;<br>Table 2 - Number of studies and participants reporting adverse events;<br>Figures 2-4 - Forest plots of adverse events;<br>Supplement 5 - Effect estimates for all adverse events with subgroups;<br>Supplement 6 - Forest plots of adverse events; |
| 38 |                                    |    |                                                                                                                                                                                                          |                                                                                                                    |                                                                                                                                                                                                                                                                                                                                          |                                                                                                                                                                                                                                                                  |
| 39 |                                    |    |                                                                                                                                                                                                          |                                                                                                                    |                                                                                                                                                                                                                                                                                                                                          |                                                                                                                                                                                                                                                                  |
| 40 |                                    |    |                                                                                                                                                                                                          |                                                                                                                    |                                                                                                                                                                                                                                                                                                                                          |                                                                                                                                                                                                                                                                  |
| 41 |                                    |    |                                                                                                                                                                                                          |                                                                                                                    |                                                                                                                                                                                                                                                                                                                                          |                                                                                                                                                                                                                                                                  |
| 42 |                                    |    |                                                                                                                                                                                                          |                                                                                                                    |                                                                                                                                                                                                                                                                                                                                          |                                                                                                                                                                                                                                                                  |
| 43 |                                    |    |                                                                                                                                                                                                          |                                                                                                                    |                                                                                                                                                                                                                                                                                                                                          |                                                                                                                                                                                                                                                                  |
| 44 |                                    |    |                                                                                                                                                                                                          |                                                                                                                    |                                                                                                                                                                                                                                                                                                                                          |                                                                                                                                                                                                                                                                  |
| 45 |                                    |    |                                                                                                                                                                                                          |                                                                                                                    |                                                                                                                                                                                                                                                                                                                                          |                                                                                                                                                                                                                                                                  |
| 46 |                                    |    |                                                                                                                                                                                                          |                                                                                                                    |                                                                                                                                                                                                                                                                                                                                          |                                                                                                                                                                                                                                                                  |
| 47 |                                    |    |                                                                                                                                                                                                          |                                                                                                                    |                                                                                                                                                                                                                                                                                                                                          |                                                                                                                                                                                                                                                                  |
| 48 |                                    |    |                                                                                                                                                                                                          |                                                                                                                    |                                                                                                                                                                                                                                                                                                                                          |                                                                                                                                                                                                                                                                  |
| 49 |                                    |    |                                                                                                                                                                                                          |                                                                                                                    |                                                                                                                                                                                                                                                                                                                                          |                                                                                                                                                                                                                                                                  |
| 50 |                                    |    |                                                                                                                                                                                                          |                                                                                                                    |                                                                                                                                                                                                                                                                                                                                          |                                                                                                                                                                                                                                                                  |
| 51 |                                    |    |                                                                                                                                                                                                          |                                                                                                                    |                                                                                                                                                                                                                                                                                                                                          |                                                                                                                                                                                                                                                                  |
| 52 |                                    |    |                                                                                                                                                                                                          |                                                                                                                    |                                                                                                                                                                                                                                                                                                                                          |                                                                                                                                                                                                                                                                  |
| 53 |                                    |    |                                                                                                                                                                                                          |                                                                                                                    |                                                                                                                                                                                                                                                                                                                                          |                                                                                                                                                                                                                                                                  |
| 54 |                                    |    |                                                                                                                                                                                                          |                                                                                                                    |                                                                                                                                                                                                                                                                                                                                          |                                                                                                                                                                                                                                                                  |
| 55 |                                    |    |                                                                                                                                                                                                          |                                                                                                                    |                                                                                                                                                                                                                                                                                                                                          |                                                                                                                                                                                                                                                                  |
| 56 |                                    |    |                                                                                                                                                                                                          |                                                                                                                    |                                                                                                                                                                                                                                                                                                                                          |                                                                                                                                                                                                                                                                  |
| 57 |                                    |    |                                                                                                                                                                                                          |                                                                                                                    |                                                                                                                                                                                                                                                                                                                                          |                                                                                                                                                                                                                                                                  |
| 58 |                                    |    |                                                                                                                                                                                                          |                                                                                                                    |                                                                                                                                                                                                                                                                                                                                          |                                                                                                                                                                                                                                                                  |
| 59 |                                    |    |                                                                                                                                                                                                          |                                                                                                                    |                                                                                                                                                                                                                                                                                                                                          |                                                                                                                                                                                                                                                                  |
| 60 |                                    |    |                                                                                                                                                                                                          |                                                                                                                    |                                                                                                                                                                                                                                                                                                                                          |                                                                                                                                                                                                                                                                  |

|    |                   |    |                                               |   |                           |                   |
|----|-------------------|----|-----------------------------------------------|---|---------------------------|-------------------|
| 1  |                   |    |                                               |   |                           |                   |
| 2  |                   |    |                                               |   |                           |                   |
| 3  |                   |    |                                               |   |                           |                   |
| 4  |                   |    |                                               |   |                           | Supplement 7 -    |
| 5  |                   |    |                                               |   |                           | Studies reporting |
| 6  |                   |    |                                               |   |                           | no adverse events |
| 7  | Risk of bias      | 22 | Present results of any assessment of          | — | No specific additional    | p. 9;             |
| 8  | across studies    |    | risk of bias across studies (see item         |   | information is required   |                   |
| 9  | (18)              |    | 15).                                          |   | for systematic reviews    | Table 1 -         |
| 10 |                   |    |                                               |   | of harms. See item 15     | Summary of        |
| 11 |                   |    |                                               |   | above.                    | methodological    |
| 12 |                   |    |                                               |   |                           | quality           |
| 13 |                   |    |                                               |   |                           | assessments       |
| 14 |                   | 23 | Give results of additional analyses, if       | — | No specific additional    | p. 10;            |
| 15 |                   |    | done (eg, sensitivity or subgroup             |   | information is required   |                   |
| 16 |                   |    | analyses, meta-regression (see item           |   | for systematic reviews    | Supplement 5 -    |
| 17 |                   |    | 16)).                                         |   | of harms.                 | Effect estimates  |
| 18 |                   |    |                                               |   |                           | for all adverse   |
| 19 |                   |    |                                               |   |                           | events with       |
| 20 |                   |    |                                               |   |                           | subgroups;        |
| 21 |                   |    |                                               |   |                           |                   |
| 22 |                   |    |                                               |   |                           | Supplement 6 –    |
| 23 |                   |    |                                               |   |                           | Forest plots of   |
| 24 | <b>Discussion</b> |    |                                               |   |                           | adverse events    |
| 25 | Summary of        | 24 | Summarise the main findings including         | — | No specific additional    | p. 15-17          |
| 26 | evidence (18)     |    | the strength of evidence for each main        |   | information is required   |                   |
| 27 |                   |    | outcome; consider their relevance to key      |   | for systematic reviews    |                   |
| 28 |                   |    | groups (eg, healthcare providers, users,      |   | of harms.                 |                   |
| 29 |                   |    | and policy makers).                           |   |                           |                   |
| 30 | Limitations       | 25 | Discuss limitations at study and outcome      | — | Recognise possible        | p. 18-19          |
| 31 | (18)              |    | level (eg, risk of bias), and at review level |   | limitations of meta-      |                   |
| 32 |                   |    | (eg, incomplete retrieval of identified       |   | analysis for rare adverse |                   |
| 33 |                   |    | research, reporting bias).                    |   | events (ie, quality and   |                   |
| 34 |                   |    |                                               |   | quantity of data), issues |                   |
| 35 |                   |    |                                               |   | noted previously related  |                   |
| 36 |                   |    |                                               |   | to collection and         |                   |
| 37 | Conclusions       | 26 | Provide a general interpretation of the       | — | reporting.                | p. 19-20          |
| 38 | (19)              |    | results in the context of other evidence,     |   | State conclusions in      |                   |
| 39 |                   |    | and implications for future research.         |   | coherence with the        |                   |
| 40 |                   |    |                                               |   | review findings. When     |                   |
| 41 |                   |    |                                               |   | adverse events were not   |                   |
| 42 |                   |    |                                               |   | identified we caution     |                   |
| 43 |                   |    |                                               |   | against the conclusion    |                   |
| 44 |                   |    |                                               |   | that the intervention is  |                   |
| 45 |                   |    |                                               |   | “safe,” when, in reality, |                   |
| 46 |                   |    |                                               |   | its safety remains        |                   |
| 47 | <b>Funding</b>    |    |                                               |   | unknown.                  |                   |
| 48 | Funding (19)      | 27 | Describe sources of funding for the           | — | No specific additional    | p. 22             |
| 49 |                   |    | systematic review and other support (eg,      |   | information is required   |                   |
| 50 |                   |    | supply of data); role of funders for the      |   | for systematic reviews    |                   |
| 51 |                   |    | systematic review.                            |   | of harms.                 |                   |
| 52 |                   |    |                                               |   |                           |                   |
| 53 |                   |    |                                               |   |                           |                   |
| 54 |                   |    |                                               |   |                           |                   |
| 55 |                   |    |                                               |   |                           |                   |
| 56 |                   |    |                                               |   |                           |                   |
| 57 |                   |    |                                               |   |                           |                   |
| 58 |                   |    |                                               |   |                           |                   |
| 59 |                   |    |                                               |   |                           |                   |
| 60 |                   |    |                                               |   |                           |                   |
