# Supplementary material for: Safety of corticosteroids in young children with acute respiratory conditions: a systematic review and meta-analysis
Source: PubMed Central journal article supplement — BMJ Open. 2019 Aug 1;9(8):e028511. doi: 10.1136/bmjopen-2018-028511 (PMC6688746; doi:10.1136/bmjopen-2018-028511), 2019-08-01
Supplement: bmjopen-2018-028511supp004.pdf [file bmjopen-2018-028511supp004.pdf]

**Supplement 4. Methodological quality assessments of included studies**

| Study (year)         | Harms pre-defined | Serious AE defined | Severe AE defined | Deaths specified | Mode of collection |         | Who collected AE | Training/ background of assessors | Timing/ frequency of AE collection | Checklist used for AE | Encompass all AE | Withdrawal and losses to follow-up specified | AE in each arm specified | No. and type of AE specified | Type of analysis |
|----------------------|-------------------|--------------------|-------------------|------------------|--------------------|---------|------------------|-----------------------------------|------------------------------------|-----------------------|------------------|----------------------------------------------|--------------------------|------------------------------|------------------|
|                      |                   |                    |                   |                  | ACTIVE             | PASSIVE |                  |                                   |                                    |                       |                  |                                              |                          |                              |                  |
| Alangari (2014)      | N                 | N                  | N                 | N                | N                  | N       | N                | N                                 | N                                  | N                     | Y                | N                                            | N                        | N                            | N                |
| Alansari (2013)      | N                 | N                  | N                 | N                | Y                  | N       | Y                | Y                                 | Y                                  | N                     | Y                | Y                                            | N                        | N                            | N                |
| Aljebab (2017)       | Y                 | N                  | N                 | N                | Y                  | Y       | Y                | Y                                 | Y                                  | U                     | Y                | Y                                            | N                        | Y                            | Y                |
| Alshehr (2005)       | N                 | N                  | N                 | N                | N                  | N       | N                | N                                 | N                                  | N                     | Y                | N                                            | N                        | Y                            | N                |
| Altamimi (2006)      | N                 | N                  | N                 | N                | Y                  | N       | Y                | Y                                 | Y                                  | N                     | Y                | Y                                            | N                        | Y                            | N                |
| Bacharier (2008)     | N                 | N                  | N                 | N                | N                  | N       | N                | N                                 | N                                  | N                     | Y                | Y                                            | N                        | N                            | N                |
| Bisgaard (2006)      | Y                 | N                  | N                 | N                | Y                  | N       | N                | N                                 | Y                                  | N                     | N                | Y                                            | Y                        | U                            | Y                |
| Bjornson (2004)      | N                 | N                  | N                 | N                | Y                  | N       | Y                | Y                                 | Y                                  | N                     | Y                | N                                            | N                        | Y                            | N                |
| Brunette (1988)      | Y                 | N                  | N                 | N                | Y                  | N       | N                | N                                 | Y                                  | Y                     | Y                | N                                            | N                        | Y                            | Y                |
| Buckingham (2002)    | N                 | N                  | N                 | Y                | Y                  | N       | Y                | Y                                 | Y                                  | N                     | Y                | N                                            | N                        | Y                            | N                |
| Bulow (1999)         | N                 | N                  | N                 | N                | N                  | N       | N                | N                                 | N                                  | N                     | Y                | N                                            | Y                        | N                            | N                |
| Chang (2008)         | N                 | N                  | N                 | N                | Y                  | N       | N                | N                                 | Y                                  | N                     | Y                | Y                                            | Y                        | Y                            | N                |
| Chen (2008)          | N                 | N                  | N                 | N                | N                  | N       | N                | N                                 | N                                  | N                     | Y                | N                                            | N                        | N                            | N                |
| Chub-Appakarn (2007) | N                 | N                  | N                 | N                | N                  | N       | N                | N                                 | N                                  | N                     | Y                | N                                            | N                        | N                            | N                |
| Clavenna (2014)      | N                 | N                  | N                 | N                | Y                  | Y       | Y                | Y                                 | Y                                  | N                     | Y                | Y                                            | N                        | N                            | N                |
| Connett (1994)       | N                 | N                  | N                 | N                | N                  | N       | N                | N                                 | N                                  | N                     | Y                | N                                            | N                        | Y                            | N                |
| Connolly (1969)      | N                 | N                  | N                 | Y                | Y                  | N       | N                | N                                 | Y                                  | N                     | Y                | N                                            | N                        | Y                            | N                |
| Corneli (2007)       | N                 | N                  | N                 | N                | Y                  | N       | Y                | Y                                 | Y                                  | N                     | Y                | Y                                            | N                        | N                            | N                |

|                            |   |   |   |   |   |   |   |   |   |   |   |   |   |   |   |
|----------------------------|---|---|---|---|---|---|---|---|---|---|---|---|---|---|---|
| Cronin (2016)              | N | N | N | N | Y | Y | Y | Y | Y | N | Y | Y | N | Y | N |
| Csonka (2003)              | N | N | N | N | N | N | N | N | N | N | Y | Y | Y | Y | N |
| Daugbjerg (1993)           | N | N | N | N | N | N | N | N | N | N | Y | N | Y | Y | N |
| Dawson (1993)              | N | N | N | N | Y | Y | Y | Y | Y | U | Y | N | N | N | N |
| Ducharme (2009)            | Y | Y | N | N | Y | N | Y | Y | Y | N | Y | Y | Y | Y | Y |
| Eboriadou (2010)           | N | N | N | N | Y | N | N | N | N | N | Y | N | N | U | N |
| Eden (1967)                | N | N | N | Y | N | N | N | N | N | N | Y | N | N | U | N |
| Escobedo Chavez (1992)     | N | N | N | N | N | N | N | N | N | N | Y | N | N | N | N |
| Fifoot (2007)              | N | N | N | N | N | N | N | N | N | N | Y | Y | N | N | N |
| Fitzgerald (1996)          | N | N | N | N | U | U | N | N | Y | N | Y | Y | N | N | Y |
| Francis (1997)             | N | Y | N | N | N | N | N | N | N | N | U | Y | Y | N | N |
| Garbutt (2013)             | N | N | N | N | Y | N | Y | Y | Y | N | Y | N | N | N | N |
| Ghirga (2002)              | N | N | N | N | N | N | N | N | N | N | Y | N | N | N | N |
| Gill (2017)                | N | N | N | Y | Y | N | N | N | Y | N | Y | N | N | Y | Y |
| Goebel (2000)              | N | N | N | N | Y | N | Y | Y | Y | N | N | N | N | Y | N |
| Grant (1996)               | N | N | N | N | Y | Y | N | N | Y | N | Y | N | N | N | Y |
| Gries (2000)               | N | N | N | N | Y | N | Y | Y | Y | N | Y | N | N | Y | Y |
| Hedlin (1999) <sup>1</sup> | N | N | N | N | Y | N | Y | N | Y | Y | Y | N | Y | Y | Y |
| Husby (1993)               | N | N | N | N | U | N | Y | N | Y | N | Y | N | N | N | N |
| Inglis (1993)              | N | N | N | Y | Y | Y | N | N | Y | N | Y | Y | Y | Y | N |
| Jan (2000)                 | N | N | N | N | Y | N | N | N | Y | Y | Y | N | N | N | N |
| Jartti (2006)              | N | N | N | N | N | N | N | N | N | N | Y | N | N | N | N |
| Jartti (2007)              | N | N | N | N | N | N | N | N | N | N | Y | N | N | N | N |
| Jartti (2015)              | N | N | N | N | N | N | N | N | N | N | U | Y | N | N | N |
| Johnson (1996)             | N | N | N | N | N | N | N | N | N | N | Y | N | N | Y | N |
| Johnson (1998)             | N | N | N | N | N | N | N | N | N | N | U | N | N | Y | N |
| Klassen (1994)             | N | N | N | N | N | N | N | N | N | N | Y | N | N | Y | N |
| Klassen (1996)             | N | N | N | N | N | N | N | N | N | N | Y | N | N | Y | N |
| Klassen (1998)             | N | N | N | N | Y | Y | Y | Y | U | N | Y | Y | N | Y | N |

|                       |   |   |   |   |   |   |   |   |   |   |   |   |   |   |   |
|-----------------------|---|---|---|---|---|---|---|---|---|---|---|---|---|---|---|
| Kuyucu (2004)         | N | N | N | N | N | N | N | N | N | N | Y | N | N | N | N |
| Lai (2005)            | N | N | N | N | Y | N | N | N | Y | Y | Y | N | N | N | Y |
| Langton-Hewer (1998)  | N | N | N | N | N | N | N | N | N | N | Y | N | N | Y | N |
| Lee (2001)            | N | N | N | Y | Y | N | N | N | Y | N | Y | Y | Y | Y | N |
| Leer (1969)           | N | N | N | N | N | N | N | N | N | N | Y | N | Y | Y | N |
| Lehmann (2008)        | N | N | N | Y | Y | N | N | N | Y | N | Y | Y | Y | Y | N |
| Leipzig (1979)        | N | N | N | N | N | N | N | N | N | N | Y | N | N | N | N |
| Lin (1991)            | N | N | N | N | N | N | N | N | N | N | Y | N | N | Y | N |
| Lucas-Bouwman (2001)  | N | N | N | N | N | N | N | N | N | N | Y | Y | N | Y | N |
| Nahum (2009)          | N | N | N | Y | Y | N | N | N | Y | N | Y | Y | Y | Y | N |
| Paniagua (2017)       | N | N | N | N | Y | N | N | N | N | N | Y | N | N | Y | N |
| Panickar (2009)       | N | N | N | N | Y | Y | Y | Y | Y | N | Y | N | N | Y | N |
| Panigada (2014)       | N | N | N | N | Y | N | N | N | Y | N | Y | Y | Y | Y | N |
| Plint (2009)          | N | N | N | N | Y | N | Y | Y | Y | N | Y | N | N | Y | N |
| Razi (2015)           | N | N | N | N | N | N | N | N | N | N | Y | N | N | N | N |
| Roberts (1999)        | N | N | N | N | N | N | N | N | N | N | Y | N | N | Y | N |
| Roorda (1998)         | N | N | N | N | N | N | N | N | N | N | Y | N | N | N | N |
| Roosevelt (1996)      | N | N | N | N | Y | N | Y | Y | Y | N | Y | N | N | Y | N |
| Sadowitz (2012)       | N | N | N | N | Y | Y | N | N | Y | N | Y | Y | Y | Y | N |
| Saito (2017)          | N | N | N | N | Y | N | N | N | N | N | Y | N | N | N | N |
| Schuh (2008)          | N | N | N | N | Y | N | Y | Y | Y | Y | Y | N | N | N | N |
| Schuh (2009)          | N | N | N | N | N | N | N | N | N | N | Y | Y | N | Y | N |
| Siomou (2003)         | Y | N | N | N | Y | N | N | N | Y | U | Y | N | N | N | N |
| Sparrow (2006)        | N | N | N | N | N | N | N | N | N | N | Y | N | N | N | N |
| Stafford (1998)       | Y | N | N | N | Y | N | N | N | Y | Y | Y | N | N | Y | N |
| Storr (1987)          | N | N | N | N | N | N | N | N | N | N | Y | N | N | N | N |
| Sumboonnanonda (1997) | N | N | N | N | Y | N | N | N | Y | N | Y | N | N | Y | N |

|                             |   |   |   |   |   |   |   |   |   |   |   |   |   |   |   |
|-----------------------------|---|---|---|---|---|---|---|---|---|---|---|---|---|---|---|
| Sung (1998)                 | N | N | N | N | Y | Y | Y | Y | N | N | Y | N | N | N | N |
| Super (1989)                | N | N | N | N | N | N | N | N | N | N | Y | N | N | N | N |
| Sussman (1964)              | N | N | N | N | Y | N | N | N | N | N | Y | N | N | Y | N |
| Svedmyr (1995)              | N | N | N | N | N | N | N | N | N | N | Y | N | Y | N | N |
| Svedmyr (1999) <sup>1</sup> | N | N | N | N | Y | N | Y | N | Y | Y | Y | N | Y | Y | Y |
| Tagarro (2014)              | N | N | N | N | N | N | N | N | N | N | Y | N | N | Y | N |
| Tal (1983)                  | N | N | N | Y | N | N | N | N | N | N | Y | N | N | N | N |
| Tamura (2008)               | N | N | N | N | Y | N | N | N | N | N | Y | N | N | N | N |
| Teeratakulpisarn (2007)     | N | N | N | N | Y | N | Y | Y | Y | N | Y | N | N | Y | N |
| van Woensel (1997)          | N | N | N | Y | N | N | N | N | N | N | Y | N | N | N | N |
| Webb (1986)                 | N | N | N | N | Y | Y | N | N | Y | N | Y | N | N | N | N |
| Zhang (2003)                | N | N | N | N | Y | N | N | N | N | N | Y | N | N | N | N |

<sup>1</sup> Hedlin 1999 and Svedmyr 1999 are associated publications; the two papers are assessed as one study

N: no; No.: number; U: unsure; Y: yes

## REFERENCES

1. Chou R, Aronson N, Atkins DL, et al. Accessing harms when comparing medication interventions. In: Agency for Healthcare Research and Quality. Methods guide for effectiveness and comparative effectiveness reviews. Rockville, MD; 2008.
