# Supplementary material for: Safety of corticosteroids in young children with acute respiratory conditions: a systematic review and meta-analysis
Source: PubMed Central journal article supplement — BMJ Open. 2019 Aug 1;9(8):e028511. doi: 10.1136/bmjopen-2018-028511 (PMC6688746; doi:10.1136/bmjopen-2018-028511), 2019-08-01
Supplement: bmjopen-2018-028511supp005.pdf [file bmjopen-2018-028511supp005.pdf]

|                     |                                                               |        |
|---------------------|---------------------------------------------------------------|--------|
| <b>Supplement 5</b> | <b>Effect estimates for all adverse events with subgroups</b> |        |
|                     | a. Infection & respiratory system                             | p. 2-4 |
|                     | b. Gastro-intestinal tract                                    | p. 5-7 |
|                     | c. CNS & behaviour effects                                    | p. 8-9 |
|                     | d. Dermatologic conditions                                    | p. 10  |
|                     | e. Endocrine/ metabolic & musculoskeletal systems             | p. 11  |
|                     | f. Cardiovascular system                                      | p. 12  |
|                     | g. General adverse events/ other symptoms                     | p. 13  |
|                     | h. Immune system & oncology                                   | p. 14  |

The tables below report results of meta-analyses for adverse events, organized by organ systems.

Effect estimates were calculated for studies with more than one treatment arm, using risk difference (RD) for all comparative studies and, using Peto odds ratio (pOR) for studies that reported at least one event in at least one treatment arm. Shaded rows indicate all studies contributing to an outcome, for the specified comparison, without subgroup analysis. When data was available, subgroup analyses (non-shaded rows) using study-level data were conducted for dose (single versus multi-dose) and for respiratory condition (e.g., bronchiolitis).

**Supplement 5a. Infection & respiratory system**

| <b>Adverse event</b>              | <b>Comparison 1 vs. Comparison 2</b> | <b>Subgroup</b> | <b>No. of studies</b> | <b>Comparison 1 – no. of patients with events/total no. of patients</b> | <b>Comparison 2 – no. of patients with events/total no. of patients</b> | <b>RD (95% CI)</b>  | <b>I<sup>2</sup> (%)</b> | <b>Peto OR (95% CI)</b> | <b>I<sup>2</sup> (%)</b> |
|-----------------------------------|--------------------------------------|-----------------|-----------------------|-------------------------------------------------------------------------|-------------------------------------------------------------------------|---------------------|--------------------------|-------------------------|--------------------------|
| Severe infections, overall        | Systemic vs. placebo                 |                 | 4                     | 0/552                                                                   | 2/554                                                                   | 0.00 (-0.01, 0.00)  | 0                        | 0.15 (0.01, 2.45)       | 0                        |
| Severe infections, by dose        | Systemic vs. placebo                 | Single dose     | 1                     | 0/359                                                                   | 1/361                                                                   | 0.00 (-0.01, 0.00)  | NA                       | 0.14 (0.00, 6.86)       | NA                       |
|                                   | Systemic vs. placebo                 | Multi-dose      | 3                     | 0/193                                                                   | 1/193                                                                   | 0.00 (-0.01, 0.01)  | 0                        | 0.17 (0.00, 8.79)       | NA                       |
| Severe infections, by condition   | Systemic vs. placebo                 | Bronchiolitis   | 2                     | 0/179                                                                   | 0/175                                                                   | 0.00 (-0.01, 0.01)  | 0                        | NA                      | NA                       |
|                                   | Systemic vs. placebo                 | Croup           | 2                     | 0/373                                                                   | 2/379                                                                   | 0.00 (-0.01, 0.00)  | 0                        | 0.15 (0.01, 2.45)       | 0                        |
| Severe infections, overall        | Inhaled vs. placebo                  |                 | 1                     | 2/62                                                                    | 4/67                                                                    | -0.03 (-0.10, 0.04) | NA                       | 0.54 (0.11, 2.77)       | NA                       |
| Systemic infections, overall      | Systemic vs. placebo                 |                 | 4                     | 5/1095                                                                  | 4/1083                                                                  | 0.00 (0.00, 0.00)   | 0                        | 1.26 (0.34, 4.68)       | NA                       |
| Systemic infections, by dose      | Systemic vs. placebo                 | Single dose     | 2                     | 5/664                                                                   | 4/656                                                                   | 0.00 (-0.01, 0.01)  | 0                        | 1.26 (0.34, 4.68)       | NA                       |
|                                   | Systemic vs. placebo                 | Multi-dose      | 2                     | 0/431                                                                   | 0/427                                                                   | 0.00 (-0.01, 0.01)  | 0                        | NA                      | NA                       |
| Systemic infections, by condition | Systemic vs. placebo                 | Bronchiolitis   | 2                     | 0/705                                                                   | 0/695                                                                   | 0.00 (0.00, 0.00)   | 0                        | NA                      | NA                       |
|                                   | Systemic vs. placebo                 | Croup           | 1                     | 5/359                                                                   | 4/361                                                                   | 0.00 (-0.01, 0.02)  | NA                       | 1.26 (0.34, 4.68)       | NA                       |
|                                   | Systemic vs. placebo                 | Wheeze          | 1                     | 0/31                                                                    | 0/27                                                                    | 0.00 (-0.07, 0.07)  | NA                       | NA                      | NA                       |

|                              |                      |                    |   |        |        |                      |    |                     |    |
|------------------------------|----------------------|--------------------|---|--------|--------|----------------------|----|---------------------|----|
| Systemic infections, overall | Inhaled vs. placebo  | Multi-dose, wheeze | 2 | 18/91  | 20/94  | 0.00 (-0.06, 0.06)   | 0  | 0.96 (0.45, 2.05)   | NA |
| Lung/trachea, overall        | Systemic vs. placebo |                    | 7 | 18/955 | 28/928 | -0.01 ( -0.02, 0.01) | 37 | 0.61 (0.34, 1.12)   | 0  |
| Lung/trachea, by dose        | Systemic vs. placebo | Single dose        | 5 | 6/793  | 9/761  | 0.00 (-0.01, 0.00)   | 0  | 0.57 (0.20, 1.62)   | 0  |
|                              | Systemic vs. placebo | Multi-dose         | 2 | 12/162 | 19/167 | -0.09 (-0.29, 0.10)  | 69 | 0.63 (0.30, 1.33)   | 57 |
| Lung/trachea, by condition   | Systemic vs. placebo | Bronchiolitis      | 3 | 12/542 | 19/529 | -0.02 (-0.05, 0.02)  | 61 | 0.61 (0.29, 1.28)   | 30 |
|                              | Systemic vs. placebo | Croup              | 4 | 6/413  | 9/399  | -0.02 (-0.12, 0.07)  | 40 | 0.61 (0.21, 1.76)   | 6  |
| Lung/trachea, overall        | Inhaled vs. placebo  | Multi-dose, wheeze | 1 | 13/62  | 10/67  | 0.06 (-0.07, 0.19)   | NA | 1.51 (0.61, 3.70)   | NA |
| URT, overall                 | Systemic vs. placebo |                    | 6 | 9/671  | 7/656  | 0.00 (-0.01, 0.01)   | 0  | 1.21 (0.44, 3.33)   | 0  |
| URT, by dose                 | Systemic vs. placebo | Single dose        | 4 | 1/492  | 1/480  | 0.00 (-0.01, 0.01)   | 0  | 0.46 (0.02, 10.18)  | 0  |
|                              | Systemic vs. placebo | Multi-dose         | 2 | 8/179  | 6/176  | 0.01 (-0.03, 0.05)   | 0  | 1.36 (0.47, 3.96)   | NA |
| URT, by condition            | Systemic vs. placebo | Bronchiolitis      | 1 | 8/148  | 6/149  | 0.01 (-0.03, 0.06)   | NA | 1.36 (0.47, 3.96)   | NA |
| URT, by condition            | Systemic vs. placebo | Croup              | 4 | 1/492  | 1/480  | 0.00 (-0.01, 0.01)   | 0  | 0.46 (0.02, 10.18)  | 0  |
|                              | Systemic vs. placebo | Wheeze             | 1 | 0/31   | 0/27   | 0.00 (-0.07, 0.07)   | NA | NA                  | NA |
| URT, overall                 | Inhaled vs. placebo  |                    | 6 | 24/495 | 24/499 | 0.00 (-0.02, 0.02)   | 0  | 1.03 (0.57, 1.85)   | 21 |
| URT, by dose                 | Inhaled vs. placebo  | Single dose        | 3 | 2/140  | 0/144  | 0.00 (-0.02, 0.03)   | 14 | 7.40 (0.45, 121.47) | NA |
|                              | Inhaled vs. placebo  | Multi-dose         | 3 | 22/355 | 24/355 | -0.01 (-0.04, 0.03)  | 0  | 0.93 (0.51, 1.71)   | 0  |

|                                |                      |                |   |        |        |                     |    |                     |    |
|--------------------------------|----------------------|----------------|---|--------|--------|---------------------|----|---------------------|----|
| URT, by condition              | Inhaled vs. placebo  | Croup          | 3 | 2/140  | 0/144  | 0.00 (-0.02, 0.03)  | 14 | 7.40 (0.45, 121.47) | NA |
|                                | Inhaled vs. placebo  | Wheeze         | 3 | 22/355 | 24/355 | -0.01 (-0.04, 0.03) | 0  | 0.93 (0.51, 1.71)   | 0  |
| Voice complaints, overall      | Systemic vs. placebo |                | 1 | 0/31   | 0/27   | 0.00 (-0.07, 0.07)  | NA | NA                  | NA |
| Voice complaints, overall      | Inhaled vs. placebo  | All multi-dose | 4 | 38/343 | 43/337 | -0.01 (-0.10, 0.07) | 64 | 0.85 (0.53, 1.36)   | 73 |
| Voice complaints, by condition | Inhaled vs. placebo  | Asthma         | 2 | 4/50   | 9/49   | -0.08 (-0.46, 0.31) | 90 | 0.39 (0.12, 1.26)   | 81 |
|                                | Inhaled vs. placebo  | Wheeze         | 2 | 34/293 | 34/288 | 0.00 (-0.04, 0.04)  | 0  | 0.99 (0.59, 1.64)   | NA |

RD: risk difference; CI: confidence interval; NA not applicable/estimable; no.: number; Peto OR: Peto odds ratio; URT=upper respiratory tract; vs.: versus

**Supplement 5b. Gastro-intestinal tract**

| <b>Adverse event</b>   | <b>Comparison 1 vs. Comparison 2</b> | <b>Subgroup</b>    | <b>No. of studies</b> | <b>Comparison 1 – no. of patients with events/total no. of patients</b> | <b>Comparison 2 – no. of patients with events/total no. of patients</b> | <b>RD (95% CI)</b>  | <b>I<sup>2</sup> (%)</b> | <b>Peto OR (95% CI)</b> | <b>I<sup>2</sup> (%)</b> |
|------------------------|--------------------------------------|--------------------|-----------------------|-------------------------------------------------------------------------|-------------------------------------------------------------------------|---------------------|--------------------------|-------------------------|--------------------------|
| Bleeding, overall      | Systemic vs. placebo                 |                    | 7                     | 31/1287                                                                 | 31/1262                                                                 | 0.00 (0.00, 0.00)   | 0                        | 1.00 (0.60, 1.67)       | 0                        |
| Bleeding, by dose      | Systemic vs. placebo                 | Single dose        | 4                     | 2/800                                                                   | 1/790                                                                   | 0.00 (0.00, 0.00)   | 0                        | 1.87 (0.19, 18.27)      | NA                       |
|                        | Systemic vs. placebo                 | Multi-dose         | 3                     | 29/487                                                                  | 30/472                                                                  | 0.00 (-0.02, 0.02)  | 0                        | 0.96 (0.57, 1.64)       | 0                        |
| Bleeding, by condition | Systemic vs. placebo                 | Bronchiolitis      | 5                     | 31/881                                                                  | 31/852                                                                  | 0.00 (-0.01, 0.01)  | 0                        | 1.00 (0.60, 1.67)       | 0                        |
|                        | Systemic vs. placebo                 | Croup              | 2                     | 0/406                                                                   | 0/410                                                                   | 0.00 (-0.01, 0.01)  | 0                        | NA                      | NA                       |
| Bleeding, overall      | Inhaled vs. placebo                  | Single dose, croup | 1                     | 0/48                                                                    | 0/49                                                                    | 0.00 (-0.04, 0.04)  | NA                       | NA                      | NA                       |
| Vomiting, overall      | Systemic vs. placebo                 |                    | 7                     | 38/1603                                                                 | 34/1573                                                                 | 0.00 (0.00, 0.01)   | 0                        | 1.10 (0.69, 1.76)       | 17                       |
| Vomiting, by dose      | Systemic vs. placebo                 | Single dose        | 4                     | 21/747                                                                  | 23/712                                                                  | 0.00 (-0.02, 0.01)  | 0                        | 0.87 (0.47, 1.59)       | 24                       |
|                        | Systemic vs. placebo                 | Multi-dose         | 3                     | 17/856                                                                  | 11/861                                                                  | 0.00 (-0.01, 0.02)  | 37                       | 1.58 (0.75, 3.36)       | 0                        |
| Vomiting, by condition | Systemic vs. placebo                 | Asthma             | 1                     | 1/37                                                                    | 5/33                                                                    | -0.11 (-0.27, 0.06) | 33                       | 0.19 (0.03, 1.02)       | 0                        |
|                        | Systemic vs. placebo                 | Bronchiolitis      | 3                     | 24/751                                                                  | 21/718                                                                  | 0.00 (-0.02, 0.02)  | 0                        | 1.12 (0.62, 2.04)       | 0                        |
|                        | Systemic vs. placebo                 | Croup              | 1                     | 3/359                                                                   | 4/361                                                                   | 0.00 (-0.02, 0.01)  | NA                       | 0.75 (0.17, 3.34)       | NA                       |

|                         |                                 |                    |   |        |        |                      |    |                     |    |
|-------------------------|---------------------------------|--------------------|---|--------|--------|----------------------|----|---------------------|----|
|                         | Systemic vs. placebo            | Wheeze             | 2 | 10/456 | 4/461  | 0.02 (-0.06, 0.11)   | 87 | 2.55 (0.87, 7.46)   | 0  |
| Vomiting, overall       | Inhaled vs. placebo             |                    | 5 | 28/421 | 28/420 | 0.00 (-0.03, 0.04)   | 0  | 1.00 (0.58, 1.72)   | 0  |
| Vomiting, by dose       | Inhaled vs. placebo             | Single dose        | 1 | 2/25   | 1/25   | 0.04 (-0.09, 0.17)   | NA | 2.00 (0.20, 20.20)  | NA |
|                         | Inhaled vs. placebo             | Multi-dose         | 4 | 26/396 | 27/395 | 0.00 (-0.03, 0.03)   | 0  | 0.96 (0.55, 1.67)   | 0  |
| Vomiting, by condition  | Inhaled vs. placebo             | Asthma             | 1 | 1/28   | 0/27   | 0.04 (-0.06, 0.13)   | NA | 7.13 (0.14, 359.55) | NA |
|                         | Inhaled vs. placebo             | Croup              | 2 | 4/67   | 4/65   | 0.00 (-0.08, 0.08)   | 0  | 0.97 (0.23, 4.00)   | 0  |
|                         | Inhaled vs. placebo             | Wheeze             | 2 | 23/326 | 24/328 | 0.00 (-0.04, 0.04)   | 0  | 0.96 (0.53, 1.74)   | 0  |
| Vomiting, overall       | Dexamethasone vs. other steroid |                    | 6 | 12/663 | 51/710 | -0.06 (-0.09, -0.02) | 58 | 0.29 (0.17, 0.48)   | 0  |
| Vomiting, by dose       | Dexamethasone vs. other steroid | Single dose        | 5 | 6/376  | 39/420 | -0.07 (-0.11, -0.02) | 47 | 0.23 (0.12, 0.42)   | 0  |
|                         | Dexamethasone vs. other steroid | Multi-dose         | 1 | 6/287  | 12/290 | -0.02 (-0.05, -0.01) | NA | 0.51 (0.20, 1.30)   | NA |
| Vomiting, by condition  | Dexamethasone vs. other steroid | Asthma             | 3 | 6/466  | 28/466 | -0.05 (-0.11, 0.00)  | 77 | 0.26 (0.13, 0.52)   | 52 |
|                         | Dexamethasone vs. other steroid | Croup              | 2 | 5/111  | 8/75   | -0.04 (-0.16, 0.08)  | 64 | 0.46 (0.14, 1.45)   | 0  |
|                         | Dexamethasone vs. other steroid | Other conditions   | 1 | 1/86   | 15/169 | -0.08 (-0.13, -0.02) | 3  | 0.25 (0.09, 0.72)   | 0  |
| Abdominal pain, overall | Systemic vs. placebo            | Single dose, croup | 1 | 1/359  | 1/361  | 0.00 (-0.01, 0.01)   | NA | 1.01 (0.06, 16.11)  | NA |
| Abdominal pain, overall | Dexamethasone vs. other steroid |                    | 3 | 29/188 | 48/264 | -0.01 (-0.07, 0.05)  | 0  | 0.96 (0.57, 1.61)   | 0  |

|                              |                                 |                    |   |        |        |                     |    |                   |    |
|------------------------------|---------------------------------|--------------------|---|--------|--------|---------------------|----|-------------------|----|
| Abdominal pain, by condition | Dexamethasone vs. other steroid | Asthma             | 1 | 2/56   | 3/54   | -0.02 (-0.10, 0.06) | NA | 0.64 (0.11, 3.79) | NA |
|                              |                                 | Croup              | 1 | 9/46   | 7/41   | 0.02 (-0.14, 0.19)  | NA | 1.18 (0.40, 3.47) | NA |
|                              |                                 | Other conditions   | 1 | 18/86  | 38/169 | -0.01 (-0.12, 0.10) | 0  | 0.94 (0.50, 1.77) | 0  |
| Diarrhea, overall            | Systemic vs. placebo            |                    | 3 | 10/254 | 9/230  | 0.01 (-0.03, 0.04)  | 0  | 1.09 (0.43, 2.73) | 0  |
| Diarrhea, by dose            | Systemic vs. placebo            | Single dose        | 1 | 3/89   | 3/85   | 0.00 (-0.06, 0.05)  | NA | 0.95 (0.19, 4.84) | NA |
|                              | Systemic vs. placebo            | Multi-dose         | 2 | 7/165  | 6/145  | 0.01 (-0.03, 0.05)  | 0  | 1.16 (0.38, 3.54) | 0  |
| Diarrhea, by condition       | Systemic vs. placebo            | Bronchiolitis      | 1 | 3/89   | 3/85   | 0.00 (-0.06, 0.05)  | NA | 0.95 (0.19, 4.84) | NA |
|                              | Systemic vs. placebo            | Wheeze             | 2 | 7/165  | 6/145  | 0.01 (-0.03, 0.05)  | 0  | 1.16 (0.38, 3.54) | 0  |
| Diarrhea, overall            | Inhaled vs. placebo             | Multi-dose, wheeze | 2 | 41/326 | 46/328 | -0.01 (-0.09, 0.08) | 37 | 0.89 (0.57, 1.40) | 44 |

RD: risk difference; CI: confidence interval; NA: not applicable/estimable; no.: number; Peto OR: Peto odds ratio; vs.: versus

**Supplement 5c. CNS & behavior effects**

| <b>Adverse event</b>             | <b>Comparison 1 vs. Comparison 2</b> | <b>Subgroup</b>    | <b>No. of studies</b> | <b>Comparison 1 – no. of patients with events/total no. of patients</b> | <b>Comparison 2 – no. of patients with events/total no. of patients</b> | <b>RD (95% CI)</b>  | <b>I<sup>2</sup> (%)</b> | <b>Peto OR (95% CI)</b> | <b>I<sup>2</sup> (%)</b> |
|----------------------------------|--------------------------------------|--------------------|-----------------------|-------------------------------------------------------------------------|-------------------------------------------------------------------------|---------------------|--------------------------|-------------------------|--------------------------|
| Tremor/jitteriness, overall      | Systemic vs. placebo                 |                    | 5                     | 22/559                                                                  | 14/508                                                                  | 0.01 (-0.01, 0.03)  | 0                        | 1.44 (0.71, 2.92)       | 0                        |
| Tremor/jitteriness, by dose      | Systemic vs. placebo                 | Single dose        | 2                     | 9/83                                                                    | 7/56                                                                    | 0.00 (-0.08, 0.08)  | 0                        | 1.15 (0.36, 3.66)       | 0                        |
|                                  | Systemic vs. placebo                 | Multi-dose         | 3                     | 13/476                                                                  | 7/452                                                                   | 0.01 (-0.01, 0.03)  | 0                        | 1.65 (0.67, 4.02)       | 0                        |
| Tremor/jitteriness, by condition | Systemic vs. placebo                 | Asthma             | 1                     | 9/37                                                                    | 7/33                                                                    | 0.01 (-0.16, 0.18)  | 0                        | 1.15 (0.36, 3.66)       | 0                        |
|                                  |                                      | Bronchiolitis      | 3                     | 10/470                                                                  | 6/447                                                                   | 0.01 (-0.01, 0.03)  | 0                        | 1.66 (0.62, 4.46)       | 0                        |
|                                  |                                      | Wheeze             | 1                     | 3/52                                                                    | 1/28                                                                    | 0.02 (-0.07, 0.12)  | NA                       | 1.58 (0.19, 12.83)      | NA                       |
| Tremor/jitteriness, overall      | Dexamethasone vs. other steroid      | Single dose, croup | 1                     | 1/46                                                                    | 0/41                                                                    | 0.02 (-0.04, 0.08)  | NA                       | 6.63 (0.13, 336.21)     | NA                       |
| Behaviour change, overall        | Systemic vs. placebo                 |                    | 4                     | 7/588                                                                   | 3/571                                                                   | 0.00 (-0.01, 0.02)  | 19                       | 1.95 (0.55, 6.92)       | 0                        |
| Behaviour change, by dose        | Systemic vs. placebo                 | Single dose        | 2                     | 1/423                                                                   | 1/426                                                                   | 0.00 (-0.01, 0.01)  | 0                        | 1.01 (0.06, 16.11)      | NA                       |
|                                  | Systemic vs. placebo                 | Multi-dose         | 2                     | 6/165                                                                   | 2/145                                                                   | 0.02 (-0.02, 0.06)  | 11                       | 2.32 (0.56, 9.64)       | 0                        |
| Behaviour change, by condition   | Systemic vs. placebo                 | Croup              | 2                     | 1/423                                                                   | 1/426                                                                   | 0.00 (-0.01, 0.01)  | 0                        | 1.01 (0.06, 16.11)      | NA                       |
|                                  | Systemic vs. placebo                 | Wheeze             | 2                     | 6/165                                                                   | 2/145                                                                   | 0.02 (-0.02, 0.06)  | 11                       | 2.32 (0.56, 9.64)       | 0                        |
| Behaviour change, overall        | Inhaled vs. placebo                  |                    | 3                     | 6/134                                                                   | 7/135                                                                   | -0.01 (-0.04, 0.03) | 0                        | 0.81 (0.26, 2.54)       | 0                        |



|                                |                                 |                     |   |       |       |                     |    |                     |    |
|--------------------------------|---------------------------------|---------------------|---|-------|-------|---------------------|----|---------------------|----|
| Behaviour change, by dose      | Inhaled vs. placebo             | Single dose         | 1 | 0/64  | 1/68  | -0.01 (-0.06, 0.03) | NA | 0.14 (0.00, 7.25)   | NA |
|                                | Inhaled vs. placebo             | Multi-dose          | 2 | 6/70  | 6/67  | 0.02 (-0.06, 0.10)  | 0  | 0.95 (0.28, 3.15)   | 11 |
| Behaviour change, by condition | Inhaled vs. placebo             | Asthma              | 1 | 1/28  | 0/27  | 0.04 (-0.06, 0.13)  | NA | 7.13 (0.14, 359.55) | NA |
|                                | Inhaled vs. placebo             | Croup               | 2 | 5/106 | 7/108 | -0.02 (-0.05, 0.02) | 0  | 0.66 (0.20, 2.18)   | 0  |
| Behaviour change, overall      | Dexamethasone vs. other steroid | All single dose     | 2 | 35/60 | 38/57 | -0.08 (-0.25, 0.09) | 0  | 0.73 (0.34, 1.56)   | 0  |
| Behaviour change, by condition | Dexamethasone vs. other steroid | Asthma              | 1 | 10/14 | 14/16 | -0.16 (-0.45, 0.13) | NA | 0.38 (0.06, 2.21)   | NA |
|                                | Dexamethasone vs. other steroid | Croup               | 1 | 25/46 | 24/41 | -0.04 (-0.25, 0.17) | NA | 0.85 (0.36, 1.97)   | NA |
| Headache, overall              | Systemic vs. placebo            | Single dose, asthma | 1 | 0/37  | 1/33  | -0.02 (-0.10, 0.07) | 0  | 0.11 (0.00, 5.68)   | NA |
| Headache, overall              | Dexamethasone vs. other steroid | All single dose     | 2 | 7/102 | 4/95  | 0.02 (-0.08, 0.11)  | 51 | 1.63 (0.46, 5.74)   | NA |
| Headache, by condition         | Dexamethasone vs. other steroid | Asthma              | 1 | 0/56  | 0/54  | 0.00 (-0.03, 0.03)  | NA | NA                  | NA |
|                                |                                 | Croup               | 1 | 7/46  | 4/41  | 0.05 (-0.08, 0.19)  | NA | 1.63 (0.46, 5.74)   | NA |

RD: risk difference; CI: confidence interval; NA: not applicable/estimable; no.: number; Peto OR: Peto odds ratio; vs.: versus

**Supplement 5d. Dermatologic conditions**

| <b>Adverse event</b>     | <b>Comparison 1 vs. Comparison 2</b> | <b>Subgroup</b>     | <b>No. of studies</b> | <b>Comparison 1 – no. of patients with events/total no. of patients</b> | <b>Comparison 2 – no. of patients with events/total no. of patients</b> | <b>RD (95% CI)</b>  | <b>I<sup>2</sup> (%)</b> | <b>Peto OR (95% CI)</b> | <b>I<sup>2</sup> (%)</b> |
|--------------------------|--------------------------------------|---------------------|-----------------------|-------------------------------------------------------------------------|-------------------------------------------------------------------------|---------------------|--------------------------|-------------------------|--------------------------|
| Burn, overall            | Inhaled vs. placebo                  | Single dose, croup  | 1                     | 0/27                                                                    | 1/27                                                                    | -0.04 (-0.13, 0.06) | NA                       | 0.14 (0.00, 6.82)       | NA                       |
| Integument, overall      | Systemic vs. placebo                 |                     | 3                     | 4/536                                                                   | 0/543                                                                   | 0.01 (0.00, 0.01)   | 0                        | 7.59 (1.07, 54.01)      | 0                        |
| Integument, by dose      | Systemic vs. placebo                 | Single dose         | 2                     | 2/423                                                                   | 0/426                                                                   | 0.01 (0.00, 0.01)   | 0                        | 7.45 (0.47, 119.36)     | NA                       |
|                          | Systemic vs. placebo                 | Multi-dose          | 1                     | 2/133                                                                   | 0/117                                                                   | 0.02 (-0.01, 0.05)  | NA                       | 7.72 (0.48, 124.29)     | NA                       |
| Integument, by condition | Systemic vs. placebo                 | Croup               | 2                     | 2/423                                                                   | 0/426                                                                   | 0.01 (0.00, 0.01)   | 0                        | 7.45 (0.47, 119.36)     | NA                       |
|                          | Systemic vs. placebo                 | Wheeze              | 1                     | 2/113                                                                   | 0/117                                                                   | 0.02 (-0.01, 0.05)  | NA                       | 7.72 (0.48, 124.29)     | NA                       |
| Integument, overall      | Inhaled vs. placebo                  |                     | 4                     | 24/432                                                                  | 27/436                                                                  | -0.01 (-0.04, 0.02) | 11                       | 0.88 (0.50, 1.56)       | 37                       |
| Integument, by dose      | Inhaled vs. placebo                  | Single dose         | 1                     | 0/64                                                                    | 1/68                                                                    | -0.01 (-0.06, 0.03) | NA                       | 0.14 (0.00, 7.25)       | NA                       |
|                          | Inhaled vs. placebo                  | Multi-dose          | 3                     | 24/368                                                                  | 26/368                                                                  | -0.01 (-0.05, 0.04) | 38                       | 0.92 (0.52, 1.63)       | 49                       |
| Integument, by condition | Inhaled vs. placebo                  | Croup               | 2                     | 0/106                                                                   | 3/108                                                                   | -0.02 (-0.06, 0.01) | 0                        | 0.13 (0.01, 1.27)       | 0                        |
|                          | Inhaled vs. placebo                  | Wheeze              | 2                     | 24/326                                                                  | 24/328                                                                  | 0.01 (-0.05, 0.07)  | 46                       | 1.00 (0.56, 1.80)       | 47                       |
| Phlebitis, overall       | Dexamethasone vs. other steroid      | Single dose, asthma | 1                     | 0/15                                                                    | 0/17                                                                    | 0.00 (-0.11, 0.11)  | NA                       | NA                      | NA                       |

RD: risk difference; CI: confidence interval; NA: not applicable/estimable; no.: number; Peto OR: Peto odds ratio; vs.: versus

**Supplement 5e. Endocrine/metabolic & musculoskeletal systems**

| <b>Adverse event</b>                            | <b>Comparison 1 vs. Comparison 2</b> | <b>Subgroup</b>           | <b>No. of studies</b> | <b>Comparison 1 – no. of patients with events/total no. of patients</b> | <b>Comparison 2 – no. of patients with events/total no. of patients</b> | <b>RD (95% CI)</b>  | <b>I<sup>2</sup> (%)</b> | <b>Peto OR (95% CI)</b> | <b>I<sup>2</sup> (%)</b> |
|-------------------------------------------------|--------------------------------------|---------------------------|-----------------------|-------------------------------------------------------------------------|-------------------------------------------------------------------------|---------------------|--------------------------|-------------------------|--------------------------|
| Fluid & electrolyte abnormalities, overall      | Systemic vs. placebo                 |                           | 4                     | 5/832                                                                   | 1/818                                                                   | 0.00 (0.00, 0.01)   | 0                        | 3.08 (0.60, 15.94)      | 0                        |
| Fluid & electrolyte abnormalities, by dose      | Systemic vs. placebo                 | Single dose               | 1                     | 1/359                                                                   | 0/361                                                                   | 0.00 (0.00, 0.01)   | NA                       | 7.43 (0.15, 374.47)     | NA                       |
|                                                 | Systemic vs. placebo                 | Multi-dose                | 3                     | 4/473                                                                   | 1/457                                                                   | 0.00 (-0.01, 0.01)  | 0                        | 2.56 (0.42, 15.61)      | 0                        |
| Fluid & electrolyte abnormalities, by condition | Systemic vs. placebo                 | Bronchiolitis             | 2                     | 4/448                                                                   | 1/432                                                                   | 0.00 (-0.01, 0.01)  | 0                        | 2.56 (0.42, 15.61)      | 0                        |
|                                                 | Systemic vs. placebo                 | Croup                     | 2                     | 1/384                                                                   | 0/386                                                                   | 0.00 (0.00, 0.01)   | 0                        | 7.43 (0.15, 374.47)     | NA                       |
| Fluid & electrolyte abnormalities, overall      | Dexamethasone vs. other steroid      | Multi-dose, bronchiolitis | 1                     | 1/33                                                                    | 2/15                                                                    | -0.10 (-0.28, 0.08) | NA                       | 0.18 (0.01, 2.17)       | NA                       |
| Adrenal suppression, overall                    | Inhaled vs. placebo                  | Multi-dose, asthma        | 1                     | 5/6                                                                     | 4/10                                                                    | 0.43 (0.01, 0.86)   | NA                       | 5.21 (0.72, 37.57)      | NA                       |

RD: risk difference; CI: confidence interval; NA: not applicable/estimable; no.: number; Peto OR: Peto odds ratio; vs.: versus

| <b>Adverse event</b> | <b>Comparison 1 vs. Comparison 2</b> | <b>Subgroup</b>    | <b>No. of studies</b> | <b>Comparison 1 – total no. of patients</b> | <b>Comparison 2 – total no. of patients</b> | <b>Mean Difference (95% CI)</b> | <b>I<sup>2</sup> (%)</b> |
|----------------------|--------------------------------------|--------------------|-----------------------|---------------------------------------------|---------------------------------------------|---------------------------------|--------------------------|
| Linear growth        | Inhaled vs. placebo                  | Multi-dose, wheeze | 2                     | 154                                         | 109                                         | 0.10 (-0.47, 0.67)              | 9                        |

CI: confidence interval; no.: number; vs.: versus

**Supplement 5f. Cardiovascular system**

| <b>Adverse event</b>              | <b>Comparison 1 vs. Comparison 2</b> | <b>Subgroup</b>     | <b>No. of studies</b> | <b>Comparison 1 – no. of patients with events/total no. of patients</b> | <b>Comparison 2 – no. of patients with events/total no. of patients</b> | <b>RD (95% CI)</b> | <b>I<sup>2</sup> (%)</b> | <b>Peto OR (95% CI)</b> | <b>I<sup>2</sup> (%)</b> |
|-----------------------------------|--------------------------------------|---------------------|-----------------------|-------------------------------------------------------------------------|-------------------------------------------------------------------------|--------------------|--------------------------|-------------------------|--------------------------|
| Arrhythmia, overall               | Systemic vs. placebo                 | Multi-dose, wheeze  | 1                     | 0/31                                                                    | 0/27                                                                    | 0.00 (-0.07, 0.07) | NA                       | NA                      | NA                       |
| Arrhythmia, overall               | Inhaled vs. placebo                  | Multi-dose, wheeze  | 1                     | 0/29                                                                    | 0/27                                                                    | 0.00 (-0.07, 0.07) | NA                       | NA                      | NA                       |
| Arrhythmia, overall               | Dexamethasone vs. other steroid      | Multi-dose, asthma  | 1                     | 0/56                                                                    | 0/54                                                                    | 0.00 (-0.03, 0.03) | NA                       | NA                      | NA                       |
| Hypertension, overall             | Systemic vs. placebo                 | All bronchiolitis   | 3                     | 1/727                                                                   | 1/714                                                                   | 0.00 (-0.01, 0.01) | 0                        | 1.00 (0.06, 15.99)      | 50                       |
| Hypertension, by dose             | Systemic vs. placebo                 | Single dose         | 1                     | 0/305                                                                   | 0/295                                                                   | 0.00 (-0.01, 0.01) | NA                       | NA                      | NA                       |
|                                   | Systemic vs. placebo                 | Multi-dose          | 2                     | 1/422                                                                   | 1/419                                                                   | 0.00 (-0.01, 0.01) | 0                        | 1.00 (0.06, 15.99)      | 50                       |
| Hypertension, overall             | Dexamethasone vs. other steroid      | Single dose, asthma | 1                     | 0/15                                                                    | 0/17                                                                    | 0.00 (-0.11, 0.11) | NA                       | NA                      | NA                       |
| Congestive heart failure, overall | Systemic vs. placebo                 | Multi-dose, croup   | 1                     | 0/25                                                                    | 0/25                                                                    | 0.00 (-0.07, 0.07) | NA                       | NA                      | NA                       |

RD: risk difference; CI: confidence interval; NA: not applicable/estimable; no.: number; Peto OR: Peto odds ratio; vs.: versus

**Supplement 5g. General adverse events/ other symptoms**

| <b>Adverse event</b>                      | <b>Comparison 1 vs. Comparison 2</b> | <b>Subgroup</b>   | <b>No. of studies</b> | <b>Comparison 1 – no. of patients with events/total no. of patients</b> | <b>Comparison 2 – no. of patients with events/total no. of patients</b> | <b>RD (95% CI)</b>  | <b>I<sup>2</sup> (%)</b> | <b>Peto OR (95% CI)</b> | <b>I<sup>2</sup> (%)</b> |
|-------------------------------------------|--------------------------------------|-------------------|-----------------------|-------------------------------------------------------------------------|-------------------------------------------------------------------------|---------------------|--------------------------|-------------------------|--------------------------|
| General complaints <sup>1</sup> , overall | Systemic vs. placebo                 | All bronchiolitis | 2                     | 38/446                                                                  | 38/423                                                                  | 0.00 (-0.04, 0.04)  | 0                        | 1.00 (0.62, 1.60)       | 0                        |
| General complaints, by dose               | Systemic vs. placebo                 | Single dose       | 1                     | 0/46                                                                    | 0/23                                                                    | 0.00 (-0.09, 0.09)  | 0                        | NA                      | NA                       |
|                                           | Systemic vs. placebo                 | Multi-dose        | 1                     | 38/400                                                                  | 38/400                                                                  | 0.00 (-0.04, 0.04)  | 0                        | 1.00 (0.62, 1.60)       | 0                        |
| General complaints <sup>2</sup> , overall | Dexamethasone vs. other steroid      |                   | 2                     | 3/102                                                                   | 3/95                                                                    | -0.01 (-0.06, 0.03) | 0                        | 0.90 (0.18, 4.61)       | 11                       |
| General complaints, by condition          | Dexamethasone vs. other steroid      | Asthma            | 1                     | 0/56                                                                    | 1/54                                                                    | -0.02 (-0.07, 0.03) | NA                       | 0.13 (0.00, 6.58)       | NA                       |
|                                           | Dexamethasone vs. other steroid      | Croup             | 1                     | 3/46                                                                    | 2/41                                                                    | 0.01 (-0.08, 0.11)  | NA                       | 1.29 (0.21, 7.81)       | NA                       |

<sup>1</sup>Two studies reported pallor

<sup>2</sup>One study reported excessive urination; one study reported dizziness

RD: risk difference; CI: confidence interval; NA: not applicable/estimable; no.: number; Peto OR: Peto odds ratio; vs.: versus

**Supplement 5h. Immune system & oncology**

| <b>Adverse event</b>       | <b>Comparison 1 vs. Comparison 2</b> | <b>Subgroup</b> | <b>No. of studies</b> | <b>Comparison 1 –no.# of patients with events/total no. of patients</b> | <b>Comparison 2 – no. of patients with events/total no. of patients</b> | <b>RD (95% CI)</b> | <b>I<sup>2</sup> (%)</b> | <b>Peto OR (95% CI)</b> | <b>I<sup>2</sup> (%)</b> |
|----------------------------|--------------------------------------|-----------------|-----------------------|-------------------------------------------------------------------------|-------------------------------------------------------------------------|--------------------|--------------------------|-------------------------|--------------------------|
| Immunosuppression, overall | Systemic vs. placebo                 |                 | 1                     | 0/47                                                                    | 0/48                                                                    | 0.00 (-0.04, 0.04) | NA                       | NA                      | NA                       |

RD: risk difference; CI: confidence interval; NA: not applicable/estimable; no.: number; Peto OR: Peto odds ratio; vs.: versus
