# Supplementary material for: Safety of corticosteroids in young children with acute respiratory conditions: a systematic review and meta-analysis
Source: PubMed Central journal article supplement — BMJ Open. 2019 Aug 1;9(8):e028511. doi: 10.1136/bmjopen-2018-028511 (PMC6688746; doi:10.1136/bmjopen-2018-028511), 2019-08-01
Supplement: bmjopen-2018-028511supp007.pdf [file bmjopen-2018-028511supp007.pdf]

**Supplement 7. Studies reporting no adverse events**

| <b>Study</b>                | <b>Condition</b>               | <b>Comparisons - main</b>          | <b>Study design</b> | <b>Study sample</b> | <b>AE reporting</b>                                                                                                                                                                                                                                                                             |
|-----------------------------|--------------------------------|------------------------------------|---------------------|---------------------|-------------------------------------------------------------------------------------------------------------------------------------------------------------------------------------------------------------------------------------------------------------------------------------------------|
| <b>Alansari 2013</b>        | bronchiolitis                  | systemic vs. placebo               | RCT                 | 200                 | No AE overall;<br>7 days follow-up revealed no side effect concerns in treatment groups.                                                                                                                                                                                                        |
| <b>Brunette 1988</b>        | asthma, before signs of wheeze | systemic vs. systemic              | nRCT                | 32                  | No AE overall;<br>Growth and weight gains for all children were within normal range.                                                                                                                                                                                                            |
| <b>Chen 2008</b>            | asthma                         | systemic vs. inhaled vs. inhaled   | RCT, 3-arm          | 123                 | No AE overall;<br>All 3 groups reported no adverse effects.                                                                                                                                                                                                                                     |
| <b>Chub-Uppakarn 2007</b>   | croup                          | systemic vs. systemic              | RCT                 | 41                  | No AE overall;<br>No significant adverse reaction from dexamethasone treatment in either group.                                                                                                                                                                                                 |
| <b>Escobedo Chavez 1992</b> | asthma                         | systemic vs. non-corticosteroid    | RCT                 | 50                  | No AE overall;<br>We detected no side effects from the use of methylprednisolone in a single dose.                                                                                                                                                                                              |
| <b>Fifoot 2007</b>          | croup                          | systemic vs. systemic vs. systemic | RCT, 3-arm          | 99                  | No AE overall;<br>One patient in each group vomited their first dose of medication; all except one (dexamethasone 0.6mg/kg) tolerated their repeat dose;<br>no patient suffered any adverse outcomes from receiving study steroid, either at index presentation or during the follow-up period. |

|                           |                                   |                                    |            |     |                                                                                                                                |
|---------------------------|-----------------------------------|------------------------------------|------------|-----|--------------------------------------------------------------------------------------------------------------------------------|
| <b>Ghirga 2002</b>        | wheeze - recurrent, early in URTI | inhaled vs. no intervention        | RCT        | 26  | No AE overall;<br>No apparent adverse effects reported 4 years post-study.                                                     |
| <b>Husby 1993</b>         | croup                             | inhaled vs. placebo                | RCT        | 36  | No AE overall;<br>No side effects were reported.                                                                               |
| <b>Jartti 2006</b>        | wheeze - acute                    | systemic vs. placebo               | RCT        | 78  | No AE overall;<br>Prednisolone treatment well tolerated; no clinically significant adverse effects occurred.                   |
| <b>Jartti 2007</b>        | wheeze - recurrent                | systemic vs. placebo               | RCT        | 58  | No AE overall;<br>Prednisolone treatment well tolerated; no clinically significant adverse effects occurred.                   |
| <b>Klassen 1994</b>       | croup                             | inhaled vs. placebo                | RCT        | 54  | One patient in placebo group had a burning sensation on the face. No adverse events noted in budesonide group.                 |
| <b>Langton Hewer 1998</b> | asthma                            | systemic vs. systemic vs. systemic | RCT, 3-arm | 98  | No AE overall;<br>No side effect possibly attributable to prednisolone therapy was noted in any of the three treatment groups. |
| <b>Leipzig 1979</b>       | croup                             | systemic vs. placebo               | RCT        | 30  | No AE overall;<br>Observed no adverse effects or late relapses.                                                                |
| <b>Razi 2015</b>          | asthma                            | inhaled vs. placebo                | RCT        | 100 | No AE overall;<br>No drug-related adverse effects were identified during hospitalization.                                      |
| <b>Roorda 1998</b>        | croup                             | inhaled vs. placebo                | RCT        | 17  | No AE overall;<br>No side effects of treatment regimens were reported.                                                         |

|                     |                                   |                                                                     |          |     |                                                                                                                                                                                                                   |
|---------------------|-----------------------------------|---------------------------------------------------------------------|----------|-----|-------------------------------------------------------------------------------------------------------------------------------------------------------------------------------------------------------------------|
| <b>Saito 2017</b>   | asthma                            | systemic vs. inhaled                                                | RCT      | 50  | No AE overall;<br>Adverse events did not occur in either group;<br>Serum cortisol levels on the 4th day of hospitalization were 17.0mcg/dL and 10.9mcg/dL with significant suppression in the prednisolone group. |
| <b>Schuh 2009</b>   | asthma                            | systemic vs. non-corticosteroid                                     | RCT      | 130 | No AE overall;<br>No adverse effects developed in children given prednisolone after discharge.                                                                                                                    |
| <b>Sparrow 2006</b> | croup                             | systemic vs. systemic                                               | RCT      | 133 | No AE overall;<br>No adverse events in either group.                                                                                                                                                              |
| <b>Storr 1987</b>   | asthma                            | systemic vs. placebo                                                | RCT      | 140 | No AE overall;<br>There were no observed side effects related to the single prednisolone dose.                                                                                                                    |
| <b>Sung 1998</b>    | asthma                            | inhaled vs. placebo                                                 | RCT      | 44  | No AE overall;<br>No adverse effects in either group.                                                                                                                                                             |
| <b>Super 1989</b>   | croup                             | systemic vs. placebo                                                | RCT      | 33  | No AE overall;<br>Did not encounter any side effects directly attributable to dexamethasone.                                                                                                                      |
| <b>Tal 1983</b>     | wheeze - acute                    | systemic + sal;<br>systemic + placebo;<br>sal + placebo;<br>placebo | RCT, 2x2 | 32  | No AE overall;<br>No other side effects or complications were documented, aside from tremor (1 infant) as side effect of salbutamol.                                                                              |
| <b>Tamura 2008</b>  | refractory pneumonia (5 year old) | systemic                                                            | CS (#1)  | 1   | No AE overall;<br>No adverse events in any patients during steroid treatment.                                                                                                                                     |

|                         |               |                            |     |    |                                                                                                                                                                                                                                                         |
|-------------------------|---------------|----------------------------|-----|----|---------------------------------------------------------------------------------------------------------------------------------------------------------------------------------------------------------------------------------------------------------|
| <b>van Woensel 1997</b> | bronchiolitis | systemic vs. placebo       | RCT | 54 | No AE overall;<br>No clinically significant side effects of prednisolone were found.                                                                                                                                                                    |
| <b>Webb 1986</b>        | wheeze        | systemic vs. placebo       | RCT | 38 | No AE overall;<br>No side effects reported by parents and none detected on clinical exam 3 days after completing 5-day treatment course.                                                                                                                |
| <b>Zhang 2003</b>       | bronchiolitis | systemic vs. standard care | RCT | 52 | No AE overall;<br>Potential side-effects of prednisolone not included as outcome measures in this study as short-term steroid therapy has been well confirmed. At time of analysis, no adverse events were noted in patients who received prednisolone. |

AE: adverse events; CS: case series; nRCT: non-randomised controlled trial; RCT: randomised controlled trial; sal: salbutamol; URTI: upper respiratory tract infection; vs: versus
